# Supplementary material for: Identification of Multiple Novel Protein Biomarkers Shed by Human Serous Ovarian Tumors into the Blood of Immunocompromised Mice and Verified in Patient Sera
Source: PubMed Central journal article supplement (PMC3609810; doi:10.1371/journal.pone.0060129), 2013-03-27

Figure S1

A.

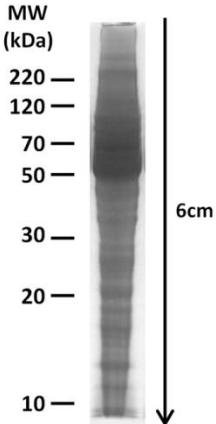

B.

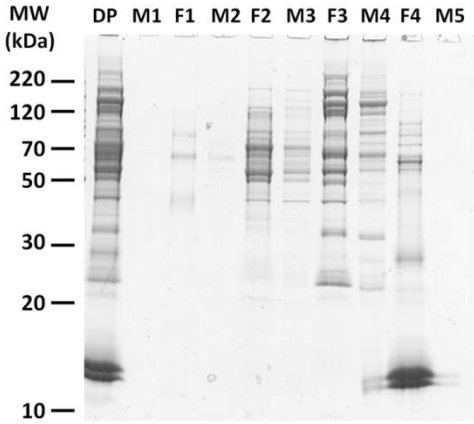

C.

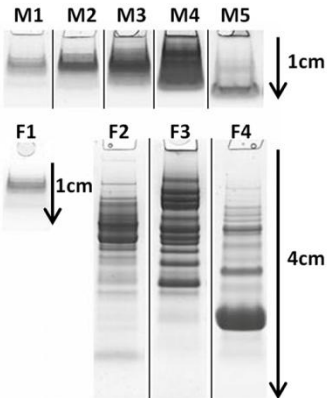

Supplement: pone.0060129.s001.pdf [file pone.0060129.s001.pdf]
