# Supplementary material for: Identification of Multiple Novel Protein Biomarkers Shed by Human Serous Ovarian Tumors into the Blood of Immunocompromised Mice and Verified in Patient Sera
Source: PubMed Central journal article supplement (PMC3609810; doi:10.1371/journal.pone.0060129), 2013-03-27
Supplement: pone.0060129.s002.pdf [file pone.0060129.s002.pdf]

Table S1. Proteins identified in the OVCAR-3 tumor supernatant by two or more unique peptides.

| Protein or Group | Accession Number | Unique Peptide Count | Spectrum Count | Sequence Coverage (%) | Length | MolWt   | pI  | Descriptive Name                                                       |
|------------------|------------------|----------------------|----------------|-----------------------|--------|---------|-----|------------------------------------------------------------------------|
| 1                | Q14204           | 249                  | 1239           | 64.9                  | 4646   | 532412  | 6.4 | Cytoplasmic dynein 1 heavy chain 1                                     |
| 2                | Q15149-4         | 246                  | 1340           | 59.5                  | 4547   | 516204  | 5.8 | Isoform 4 of Plectin                                                   |
| 3                | E9QM71           | 240                  | 1141           | 62.4                  | 4644   | 532050  | 6.4 | Uncharacterized protein                                                |
| 4                | Q09666           | 238                  | 3747           | 50.2                  | 5890   | 629114  | 6.1 | Neuroblast differentiation-associated protein AHNAK                    |
| 5                | Q9UPN3           | 206                  | 572            | 51.3                  | 5430   | 620426  | 5.4 | Microtubule-actin cross-linking factor 1, isoforms 1/2/3/5             |
| 6                | E9QMZ5           | 183                  | 865            | 44.3                  | 4543   | 517292  | 5.8 | Uncharacterized protein                                                |
| 6                | Q9QXS1-3         | 183                  | 865            | 44.3                  | 4543   | 517320  | 5.8 | Isoform PLEC-1A of Plectin                                             |
| 7                | P78527           | 167                  | 897            | 48.6                  | 4128   | 469093  | 7.1 | DNA-dependent protein kinase catalytic subunit                         |
| 8                | Q13813           | 158                  | 700            | 71.4                  | 2472   | 284538  | 5.3 | Spectrin alpha chain, brain                                            |
| 9                | Q7Z6Z7-2         | 152                  | 969            | 50.8                  | 4358   | 480203  | 5.2 | Isoform 2 of E3 ubiquitin-protein ligase HUWE1                         |
| 9                | Q7Z6Z7           | 152                  | 969            | 50.7                  | 4374   | 481896  | 5.2 | E3 ubiquitin-protein ligase HUWE1                                      |
| 10               | E9PZ16           | 150                  | 852            | 49.1                  | 4383   | 469789  | 6.5 | Uncharacterized protein                                                |
| 11               | A3KGU7           | 149                  | 602            | 68.1                  | 2477   | 285151  | 5.3 | Spectrin alpha 2                                                       |
| 11               | B9EKJ1           | 149                  | 602            | 68.1                  | 2477   | 285178  | 5.3 | Spna2 protein                                                          |
| 12               | B2ZZ83           | 144                  | 815            | 78.8                  | 2633   | 281633  | 5.7 | Filamin B                                                              |
| 13               | Q8WXI7           | 140                  | 743            | 8.8                   | 22152  | 2354561 | 6   | Mucin-16                                                               |
| 14               | Q01082           | 133                  | 597            | 70.3                  | 2364   | 274608  | 5.6 | Spectrin beta chain, brain 1                                           |
| 15               | B9EKF5           | 132                  | 1436           | 67.8                  | 2639   | 280470  | 6   | Filamin, alpha                                                         |
| 15               | Q8BTM8           | 132                  | 1436           | 67.5                  | 2647   | 281191  | 6   | Filamin-A                                                              |
| 16               | A2AFQ0           | 129                  | 815            | 41.3                  | 4378   | 482697  | 5.2 | HECT, UBA and WWE domain containing 1                                  |
| 16               | Q7TMY8           | 129                  | 815            | 41.3                  | 4377   | 482668  | 5.2 | E3 ubiquitin-protein ligase HUWE1                                      |
| 16               | Q4JG03           | 129                  | 815            | 41.3                  | 4378   | 482751  | 5.2 | Mcl-1 ubiquitin ligase                                                 |
| 16               | A2AFQ1           | 129                  | 815            | 41.3                  | 4377   | 482640  | 5.2 | HECT, UBA and WWE domain containing 1                                  |
| 17               | P21333           | 129                  | 1591           | 70.1                  | 2647   | 280737  | 6.1 | Filamin-A                                                              |
| 18               | P49327           | 128                  | 1260           | 72                    | 2511   | 273424  | 6.4 | Fatty acid synthase                                                    |
| 19               | UPI0001BB0BFA    | 128                  | 291            | 31.6                  | 5256   | 596494  | 6.4 | Protein ALO17 isoform 1                                                |
| 20               | Q5T4S7-3         | 127                  | 470            | 35.2                  | 5159   | 571859  | 6   | Isoform 3 of E3 ubiquitin-protein ligase UBR4                          |
| 20               | Q5T4S7           | 127                  | 470            | 35                    | 5183   | 573849  | 6   | E3 ubiquitin-protein ligase UBR4                                       |
| 20               | Q5T4S7-2         | 127                  | 470            | 34.9                  | 5204   | 575966  | 6   | Isoform 2 of E3 ubiquitin-protein ligase UBR4                          |
| 21               | Q62261           | 126                  | 532            | 66.6                  | 2363   | 274221  | 5.6 | Spectrin beta chain, brain 1                                           |
| 22               | Q9Y490           | 126                  | 1185           | 69.4                  | 2541   | 269765  | 6.1 | Talin-1                                                                |
| 23               | A2AIM8           | 122                  | 994            | 69.5                  | 2541   | 269819  | 6.2 | Talin 1                                                                |
| 24               | P35579           | 112                  | 750            | 59.1                  | 1960   | 226530  | 5.6 | Myosin-9                                                               |
| 25               | UPI00006070DC    | 111                  | 411            | 64.7                  | 2591   | 276597  | 5.7 | Filamin-B                                                              |
| 25               | E9QNV9           | 111                  | 411            | 64.4                  | 2602   | 277822  | 5.7 | Uncharacterized protein                                                |
| 26               | UPI0000DBD688    | 109                  | 653            | 48.1                  | 3061   | 333333  | 5.8 | collagen alpha-1(XII) chain                                            |
| 26               | E9PX70           | 109                  | 653            | 48                    | 3064   | 333731  | 5.8 | Uncharacterized protein                                                |
| 26               | Q60847-2         | 109                  | 653            | 48                    | 3065   | 333672  | 5.8 | Isoform 2 of Collagen alpha-1(XII) chain                               |
| 26               | Q60847-5         | 109                  | 653            | 47.9                  | 3068   | 334069  | 5.8 | Isoform 5 of Collagen alpha-1(XII) chain                               |
| 26               | Q60847           | 109                  | 653            | 47.1                  | 3120   | 340215  | 5.6 | Collagen alpha-1(XII) chain                                            |
| 27               | E1NZA1           | 107                  | 521            | 52.1                  | 2671   | 292742  | 7.4 | Peroxisome proliferator activated receptor interacting complex protein |
| 27               | UPI0000451CA7    | 107                  | 521            | 52.1                  | 2671   | 292708  | 7.4 | Translational activator GCN1                                           |
| 28               | B1ART6           | 105                  | 278            | 24.8                  | 5333   | 608246  | 5.4 | Microtubule-actin crosslinking factor 1 (Fragment)                     |
| 28               | E9PVY6           | 105                  | 278            | 24.3                  | 5430   | 619491  | 5.4 | Uncharacterized protein                                                |
| 29               | Q68FD5           | 103                  | 712            | 77.3                  | 1675   | 191555  | 5.7 | Clathrin heavy chain 1                                                 |
| 29               | Q5SXR6           | 103                  | 712            | 77.1                  | 1679   | 191985  | 5.7 | Clathrin, heavy polypeptide (Hc)                                       |
| 30               | Q00610-2         | 103                  | 723            | 79                    | 1639   | 187889  | 5.7 | Isoform 2 of Clathrin heavy chain 1                                    |
| 30               | Q00610           | 103                  | 723            | 77.3                  | 1675   | 191613  | 5.7 | Clathrin heavy chain 1                                                 |
| 31               | Q8VDD5           | 99                   | 631            | 56.6                  | 1960   | 226370  | 5.7 | Myosin-9                                                               |
| 32               | Q60437           | 97                   | 792            | 61                    | 1756   | 204745  | 5.6 | Periplakin                                                             |
| 32               | UPI000034ECE3    | 97                   | 792            | 61                    | 1756   | 204676  | 5.6 | periplakin                                                             |
| 33               | A2AN08-3         | 96                   | 335            | 23.7                  | 5156   | 570308  | 6.1 | Isoform 3 of E3 ubiquitin-protein ligase UBR4                          |
| 33               | A2AN08           | 96                   | 335            | 23.6                  | 5180   | 572298  | 6.1 | E3 ubiquitin-protein ligase UBR4                                       |
| 33               | A2AN08-5         | 96                   | 335            | 23.4                  | 5208   | 575184  | 6   | Isoform 5 of E3 ubiquitin-protein ligase UBR4                          |
| 34               | UPI0001E6B5EB    | 94                   | 345            | 45.4                  | 3057   | 330028  | 7.6 | PREDICTED: collagen alpha-3(VI) chain isoform 1                        |
| 34               | UPI0001E6B858    | 94                   | 345            | 45.4                  | 3062   | 330512  | 7.8 | PREDICTED: collagen alpha-3(VI) chain isoform 4                        |
| 35               | E9Q8N1           | 94                   | 130            | 3.8                   | 33467  | 3715911 | 6.4 | Uncharacterized protein                                                |
| 35               | E9Q8K5           | 94                   | 130            | 3.8                   | 33467  | 3715952 | 6.4 | Uncharacterized protein                                                |
| 35               | A2ASS6           | 94                   | 130            | 3.6                   | 35213  | 3906375 | 6.2 | Titin                                                                  |
| 36               | P01024           | 87                   | 496            | 67.7                  | 1663   | 187147  | 6.4 | Complement C3                                                          |
| 37               | O15230           | 87                   | 232            | 33                    | 3695   | 399740  | 7   | Laminin subunit alpha-5                                                |
| 38               | Q80XP1           | 86                   | 586            | 65.7                  | 1663   | 186483  | 6.7 | Complement component 3                                                 |
| 39               | Q80YX1           | 85                   | 429            | 61.2                  | 2110   | 231805  | 4.9 | Tenascin                                                               |
| 40               | Q3UGY5           | 83                   | 567            | 52.5                  | 2386   | 262841  | 5.8 | Putative uncharacterized protein                                       |
| 41               | P46940           | 82                   | 513            | 63.1                  | 1657   | 189251  | 6.5 | Ras GTPase-activating-like protein IQGAP1                              |
| 42               | P50851           | 81                   | 275            | 37.9                  | 2863   | 319107  | 5.6 | Lipopolysaccharide-responsive and beige-like anchor protein            |
| 43               | D6RGG3           | 81                   | 378            | 33.1                  | 3062   | 333203  | 5.5 | Uncharacterized protein                                                |
| 43               | Q99715           | 81                   | 378            | 33.1                  | 3063   | 333147  | 5.5 | Collagen alpha-1(XII) chain                                            |
| 44               | Q9NYQ8           | 81                   | 154            | 26.8                  | 4349   | 479321  | 5.2 | Protocadherin Fat 2                                                    |
| 45               | O15020           | 79                   | 138            | 53.2                  | 2390   | 271323  | 6.1 | Spectrin beta chain, brain 2                                           |
| 45               | UPI0000135DB9    | 79                   | 138            | 53.2                  | 2390   | 271293  | 6.1 | Spectrin beta chain, brain 2                                           |
| 46               | O75643           | 79                   | 215            | 50.7                  | 2136   | 244505  | 6.1 | U5 small nuclear ribonucleoprotein 200 kDa helicase                    |
| 47               | Q14980           | 79                   | 280            | 48.3                  | 2115   | 238257  | 5.8 | Nuclear mitotic apparatus protein 1                                    |
| 48               | Q4LE33           | 78                   | 338            | 52.4                  | 2233   | 244402  | 4.9 | TNC variant protein (Fragment)                                         |
| 49               | Q86UP2           | 74                   | 420            | 59.1                  | 1357   | 156275  | 5.6 | Kinectin                                                               |
| 50               | P42858           | 74                   | 168            | 35.4                  | 3142   | 347603  | 6.2 | Huntingtin                                                             |
| 51               | Q8VHX6-2         | 73                   | 141            | 42.8                  | 2693   | 287363  | 6   | Isoform 2 of Filamin-C                                                 |
| 51               | Q8VHX6           | 73                   | 141            | 42.3                  | 2726   | 291117  | 5.9 | Filamin-C                                                              |
| 52               | O43707           | 73                   | 1546           | 83.8                  | 911    | 104854  | 5.4 | Alpha-actinin-4                                                        |
| 53               | Q6P2Q9           | 71                   | 107            | 40.9                  | 2335   | 273599  | 8.8 | Pre-mRNA-processing-splicing factor 8                                  |
| 54               | Q9QXQ0           | 70                   | 1363           | 79.9                  | 911    | 104915  | 5.4 | Alpha-actinin-4                                                        |
| 55               | O00468           | 70                   | 490            | 49.5                  | 2045   | 214844  | 6.4 | Agrin                                                                  |
| 56               | Q93008           | 70                   | 161            | 36.2                  | 2570   | 292278  | 5.8 | Probable ubiquitin carboxyl-terminal hydrolase FAF-X                   |
| 57               | Q6ZQK2           | 69                   | 351            | 52.9                  | 1681   | 191311  | 6.6 | MKIAA0051 protein (Fragment)                                           |
| 57               | UPI0001F78C4C    | 69                   | 351            | 52.9                  | 1681   | 191283  | 6.5 | IQ motif containing GTPase activating protein 1                        |
| 58               | Q8WXH0           | 69                   | 136            | 12.7                  | 6885   | 796457  | 5.4 | Nesprin-2                                                              |
| 58               | Q8WXH0-2         | 69                   | 136            | 12.6                  | 6907   | 798877  | 5.4 | Isoform 2 of Nesprin-2                                                 |
| 59               | Q91ZX7           | 68                   | 126            | 19.1                  | 4545   | 504745  | 5.4 | Prolow-density lipoprotein receptor-related protein 1                  |
| 60               | Q7KZ85           | 67                   | 144            | 50.6                  | 1726   | 199071  | 4.9 | Transcription elongation factor SPT6                                   |
| 61               | P07814           | 66                   | 181            | 56.7                  | 1512   | 170590  | 7.3 | Bifunctional aminoacyl-tRNA synthetase                                 |
| 62               | B2RWVW6          | 65                   | 337            | 30.6                  | 2671   | 293027  | 7.5 | GCN1 general control of amino-acid synthesis 1-like 1 (Yeast)          |
| 62               | Q3UHQ5           | 65                   | 337            | 30.6                  | 2671   | 292989  | 7.3 | Putative uncharacterized protein                                       |
| 62               | E9PVA8           | 65                   | 337            | 30.6                  | 2671   | 293018  | 7.4 | Uncharacterized protein                                                |
| 63               | Q92817           | 65                   | 158            | 42.6                  | 2033   | 231602  | 7   | Envoplakin                                                             |
| 64               | Q9P273           | 65                   | 106            | 35.5                  | 2699   | 300950  | 6.4 | Teneurin-3                                                             |
| 65               | P15924           | 65                   | 315            | 27.2                  | 2871   | 331774  | 6.8 | Desmoplakin                                                            |
| 66               | A2AQ53           | 63                   | 90             | 29.3                  | 2873   | 312298  | 4.9 | Fibrillin 1                                                            |
| 67               | E9Q414           | 63                   | 70             | 19                    | 4505   | 509437  | 6.8 | Uncharacterized protein                                                |
| 68               | P53621           | 63                   | 215            | 68.2                  | 1224   | 138345  | 7.7 | Coatomer subunit alpha                                                 |
| 69               | Q64727           | 62                   | 432            | 69.1                  | 1066   | 116717  | 6   | Vinculin                                                               |
| 70               | P18206-2         | 62                   | 474            | 68.9                  | 1066   | 116722  | 6.1 | Isoform 1 of Vinculin                                                  |
| 70               | P18206           | 62                   | 474            | 64.8                  | 1134   | 123799  | 5.7 | Vinculin                                                               |
| 71               | UPI000163999A    | 62                   | 118            | 46.9                  | 2162   | 236020  | 6.5 | UPI000163999A UniRef100 entry                                          |

Table S1. Proteins identified in the OVCAR-3 tumor supernatant by two or more unique peptides.

| Protein or Group | Accession Number | Unique Peptide Count | Spectrum Count | Sequence Coverage (%) | Length | MolWt  | pI  | Descriptive Name                                                                                       |
|------------------|------------------|----------------------|----------------|-----------------------|--------|--------|-----|--------------------------------------------------------------------------------------------------------|
| 71               | P27708           | 62                   | 118            | 45.6                  | 2225   | 242981 | 6.5 | CAD protein                                                                                            |
| 72               | Q07954           | 62                   | 117            | 17.5                  | 4544   | 504610 | 5.4 | Prolow-density lipoprotein receptor-related protein 1                                                  |
| 73               | E9QPW0           | 61                   | 297            | 55.8                  | 1495   | 165852 | 6.7 | Uncharacterized protein                                                                                |
| 73               | D3YV52           | 61                   | 297            | 55.3                  | 1507   | 167282 | 6.8 | Uncharacterized protein                                                                                |
| 74               | Q14152           | 61                   | 277            | 44.6                  | 1382   | 166569 | 6.8 | Eukaryotic translation initiation factor 3 subunit A                                                   |
| 74               | Q24JU4           | 61                   | 277            | 44.6                  | 1382   | 166470 | 6.7 | Eukaryotic translation initiation factor 3, subunit A                                                  |
| 75               | UPI000024DD4E    | 60                   | 313            | 51                    | 1607   | 177187 | 5.2 | Laminin subunit gamma-1 precursor                                                                      |
| 76               | E9Q616           | 60                   | 1089           | 12.2                  | 5656   | 604265 | 6.3 | Uncharacterized protein                                                                                |
| 77               | Q5VYK3           | 60                   | 163            | 46.4                  | 1845   | 204289 | 7.1 | Proteasome-associated protein ECM29 log                                                                |
| 77               | UPI0000DD7F7A    | 60                   | 163            | 42.4                  | 2017   | 223692 | 8.7 | Proteasome-associated protein ECM29 log                                                                |
| 78               | P35580           | 60                   | 112            | 46                    | 1976   | 228997 | 5.5 | Myosin-10                                                                                              |
| 78               | B2RWP9           | 60                   | 112            | 45.7                  | 1985   | 230028 | 5.6 | MYH10 protein                                                                                          |
| 78               | P35580-2         | 60                   | 112            | 45.6                  | 1992   | 230777 | 5.6 | Isoform 2 of Myosin-10                                                                                 |
| 78               | P35580-3         | 60                   | 112            | 45.5                  | 1997   | 231367 | 5.5 | Isoform 3 of Myosin-10                                                                                 |
| 78               | Q4LE45           | 60                   | 112            | 45                    | 2018   | 233847 | 5.6 | MYH10 variant protein (Fragment)                                                                       |
| 79               | Q9Y6D6           | 60                   | 177            | 42.7                  | 1849   | 207866 | 5.9 | Brefeldin A-inhibited guanine nucleotide-exchange protein 1                                            |
| 80               | Q8CIE6           | 59                   | 205            | 62.2                  | 1224   | 138446 | 7.7 | Coatomer subunit alpha                                                                                 |
| 81               | P28665           | 59                   | 259            | 52.5                  | 1476   | 165297 | 6.4 | Murine globulin-1                                                                                      |
| 82               | P07724           | 58                   | 2414           | 85                    | 608    | 68693  | 6.1 | Serum albumin                                                                                          |
| 83               | A8K8U1           | 58                   | 513            | 60.2                  | 1230   | 136317 | 5.8 | cDNA FLJ77762, highly similar to sapiens cullin-associated and neddylation-dissociated 1 (CAND1), mRNA |
| 83               | Q86VP6           | 58                   | 513            | 60.2                  | 1230   | 136375 | 5.8 | Cullin-associated NEDD8-dissociated protein 1                                                          |
| 84               | P98160           | 58                   | 241            | 16.7                  | 4391   | 468835 | 6.5 | Basement membrane-specific heparan sulfate proteoglycan core protein                                   |
| 85               | B2RXW7           | 57                   | 161            | 49.7                  | 1738   | 192904 | 7.5 | Complement component 4B (Childo blood group)                                                           |
| 86               | P55060           | 57                   | 1000           | 73.6                  | 971    | 110417 | 5.8 | Exportin-2                                                                                             |
| 87               | Q16531           | 57                   | 234            | 55.6                  | 1140   | 126968 | 5.3 | DNA damage-binding protein 1                                                                           |
| 88               | P11047           | 56                   | 256            | 47.8                  | 1609   | 177602 | 5.1 | Laminin subunit gamma-1                                                                                |
| 89               | P55268           | 56                   | 171            | 41                    | 1798   | 195980 | 6.5 | Laminin subunit beta-2                                                                                 |
| 90               | B2ZZ91           | 56                   | 88             | 20                    | 3269   | 377122 | 5   | Golgin B1                                                                                              |
| 91               | Q9NR09           | 56                   | 179            | 18                    | 4857   | 530260 | 6   | Baculoviral IAP repeat-containing protein 6                                                            |
| 91               | UPI000159689D    | 56                   | 179            | 18                    | 4857   | 530274 | 6   | baculoviral IAP repeat-containing protein 6                                                            |
| 92               | E9PGE1           | 55                   | 122            | 60.1                  | 1253   | 138750 | 5.5 | Uncharacterized protein                                                                                |
| 92               | E7EX90           | 55                   | 122            | 60                    | 1256   | 139094 | 5.7 | Uncharacterized protein                                                                                |
| 93               | Q9NYU2           | 55                   | 81             | 53.1                  | 1555   | 177189 | 5.6 | UDP-glucose:glycoprotein glucosyltransferase 1                                                         |
| 94               | Q460N5           | 55                   | 111            | 42.1                  | 1801   | 202799 | 7.2 | Poly [ADP-ribose] polymerase 14                                                                        |
| 95               | E9QQ50           | 54                   | 210            | 41.7                  | 1344   | 161936 | 6.8 | Uncharacterized protein                                                                                |
| 95               | P23116           | 54                   | 210            | 41.7                  | 1344   | 161936 | 6.8 | Eukaryotic translation initiation factor 3 subunit A                                                   |
| 96               | E9QN70           | 54                   | 211            | 34.5                  | 1834   | 202440 | 5   | Uncharacterized protein                                                                                |
| 96               | Q3UHL7           | 54                   | 211            | 34.5                  | 1834   | 202444 | 5   | Putative uncharacterized protein                                                                       |
| 97               | UPI0000E67207    | 54                   | 191            | 25.5                  | 3083   | 338149 | 6.7 | laminin subunit alpha-1 precursor                                                                      |
| 98               | B2RUT2           | 54                   | 77             | 33.6                  | 1979   | 227596 | 5.3 | Thyroid hormone receptor interactor 11                                                                 |
| 98               | Q15643           | 54                   | 77             | 33.6                  | 1979   | 227584 | 5.3 | Thyroid receptor-interacting protein 11                                                                |
| 99               | Q6ZQ38           | 53                   | 473            | 54.2                  | 1230   | 136331 | 5.8 | Cullin-associated NEDD8-dissociated protein 1                                                          |
| 100              | P07900           | 53                   | 1084           | 72                    | 732    | 84660  | 5   | Heat shock protein HSP 90-alpha                                                                        |
| 101              | P55072           | 52                   | 820            | 78.3                  | 806    | 89322  | 5.3 | Transitional endoplasmic reticulum ATPase Transitional                                                 |
| 102              | P22314           | 52                   | 553            | 78.7                  | 1058   | 117849 | 5.8 | endoplasmic reticulum ATPase                                                                           |
| 103              | B0V043           | 52                   | 151            | 53.7                  | 1264   | 140466 | 7.6 | Ubiquitin-like modifier-activating enzyme 1                                                            |
| 103              | P26640           | 52                   | 151            | 53.7                  | 1264   | 140476 | 7.6 | Valyl-tRNA synthetase                                                                                  |
| 104              | E7EX73           | 52                   | 498            | 43.8                  | 1436   | 158644 | 5.2 | Valyl-tRNA synthetase                                                                                  |
| 104              | D3DNT2           | 52                   | 498            | 39.3                  | 1600   | 175618 | 5.3 | Uncharacterized protein                                                                                |
| 105              | P58252           | 51                   | 557            | 67.9                  | 858    | 95314  | 6.8 | Eukaryotic translation initiation factor 4 gamma, 1, isoform CRA_c                                     |
| 105              | Q3UDC8           | 51                   | 557            | 67.9                  | 858    | 95268  | 6.8 | Elongation factor 2                                                                                    |
| 106              | Q61147           | 51                   | 227            | 57.7                  | 1061   | 121151 | 5.8 | Putative uncharacterized protein                                                                       |
| 106              | E9PZD8           | 51                   | 227            | 56.4                  | 1086   | 124211 | 5.9 | Ceruloplasmin                                                                                          |
| 107              | P13639           | 51                   | 622            | 67.9                  | 858    | 95338  | 6.8 | Uncharacterized protein                                                                                |
| 108              | UPI0000167B25    | 51                   | 236            | 31.3                  | 2355   | 259223 | 5.7 | Elongation factor 2                                                                                    |
| 109              | P12270           | 51                   | 168            | 23.5                  | 2363   | 267290 | 5   | fibronectin isoform 3 preproprotein                                                                    |
| 110              | P25391           | 51                   | 96             | 22.3                  | 3075   | 337084 | 6.4 | Nucleoprotein TPR                                                                                      |
| 111              | Q14980           | 50                   | 495            | 65.4                  | 1071   | 123386 | 6.1 | Laminin subunit alpha-1                                                                                |
| 112              | Q96T23           | 50                   | 250            | 40.2                  | 1441   | 163820 | 5   | Exportin-1                                                                                             |
| 113              | P02545           | 49                   | 821            | 72.3                  | 664    | 74140  | 7   | Remodeling and spacing factor 1                                                                        |
| 114              | P34932           | 49                   | 333            | 68.7                  | 840    | 94331  | 5.2 | Prelamin-A/C                                                                                           |
| 115              | B4DZJ7           | 49                   | 661            | 59.4                  | 1065   | 118185 | 5.4 | Heat shock 70 kDa protein 4                                                                            |
| 115              | Q00267           | 49                   | 661            | 58.2                  | 1087   | 121000 | 5.1 | cDNA FLJ55629, highly similar to Transcription elongation factor SPT5                                  |
| 116              | Q02952-3         | 49                   | 188            | 42.5                  | 1677   | 180989 | 4.4 | Transcription elongation factor SPT5                                                                   |
| 116              | Q02952-2         | 49                   | 188            | 42.3                  | 1684   | 181688 | 4.4 | Isoform 3 of A-kinase anchor protein 12                                                                |
| 116              | Q02952           | 49                   | 188            | 40                    | 1782   | 191480 | 4.4 | Isoform 2 of A-kinase anchor protein 12                                                                |
| 117              | Q9P2E9           | 49                   | 290            | 41                    | 1410   | 152472 | 8.6 | A-kinase anchor protein 12                                                                             |
| 117              | A7BI36           | 49                   | 290            | 37.5                  | 1540   | 165715 | 9   | Ribosome-binding protein 1                                                                             |
| 118              | B7ZNH7           | 48                   | 135            | 38.1                  | 1794   | 192753 | 5.1 | p180/ribosome receptor                                                                                 |
| 119              | Q00410           | 48                   | 238            | 66.5                  | 1097   | 123630 | 4.9 | Collagen, type XIV, alpha 1                                                                            |
| 120              | C9JSL9           | 48                   | 76             | 41.4                  | 1411   | 162359 | 5.6 | Importin-5                                                                                             |
| 120              | Q15075           | 48                   | 76             | 41.4                  | 1411   | 162465 | 5.7 | Uncharacterized protein                                                                                |
| 121              | Q7KZF4           | 47                   | 178            | 68.4                  | 910    | 101997 | 7.2 | Early endosome antigen 1                                                                               |
| 121              | Q59FF0           | 47                   | 178            | 64.5                  | 964    | 107433 | 7.5 | Staphylococcal nuclease domain-containing protein 1                                                    |
| 122              | Q5CAQ5           | 47                   | 307            | 55.4                  | 802    | 92340  | 4.9 | EBNA-2 co-activator variant (Fragment)                                                                 |
| 122              | P14625           | 47                   | 307            | 55.3                  | 803    | 92469  | 4.8 | Tumor rejection antigen (Gp96) 1                                                                       |
| 123              | P35573           | 47                   | 64             | 42.2                  | 1532   | 174763 | 6.8 | Endoplasmic reticulum chaperone                                                                        |
| 124              | Q14839           | 47                   | 135            | 33.9                  | 1912   | 218003 | 5.9 | Glycogen debranching enzyme                                                                            |
| 124              | Q14839-2         | 47                   | 135            | 33.4                  | 1940   | 220846 | 6   | Chromodomain-helicase-DNA-binding protein 4                                                            |
| 125              | P48678           | 46                   | 591            | 67.8                  | 665    | 74238  | 7   | Isoform 2 of Chromodomain-helicase-DNA-binding protein 4                                               |
| 126              | Q08211           | 46                   | 182            | 52.5                  | 1270   | 140958 | 6.8 | Prelamin-A/C                                                                                           |
| 127              | Q9C0C9           | 46                   | 105            | 46.8                  | 1292   | 141293 | 5.1 | ATP-dependent RNA helicase A                                                                           |
| 128              | Q14683           | 46                   | 88             | 43.2                  | 1233   | 143233 | 7.6 | Ubiquitin-conjugating enzyme E2 O                                                                      |
| 129              | B0AZQ4           | 45                   | 57             | 44                    | 1217   | 141529 | 7.2 | Structural maintenance of chromosomes protein 1A                                                       |
| 129              | Q9UQE7           | 45                   | 57             | 44                    | 1217   | 141541 | 7.2 | cDNA, FLJ79494, highly similar to Structural maintenance of chromosome 3                               |
| 129              | Q9CW03           | 45                   | 57             | 44                    | 1217   | 141555 | 7.2 | Structural maintenance of chromosomes protein 3                                                        |
| 129              | Q86VX4           | 45                   | 57             | 44                    | 1217   | 141507 | 7.2 | Structural maintenance of chromosomes protein 3                                                        |
| 129              | Q6P5E5           | 45                   | 57             | 44                    | 1216   | 141441 | 7.2 | Structural maintenance of chromosomes 3                                                                |
| 130              | Q92111           | 45                   | 607            | 67                    | 697    | 76724  | 7.2 | Structural maintenance of chromosomes 3                                                                |
| 131              | P07901           | 45                   | 928            | 61.1                  | 733    | 84788  | 5   | Serotransferrin                                                                                        |
| 132              | P06909           | 45                   | 153            | 54.5                  | 1234   | 139082 | 6.9 | Heat shock protein HSP 90-alpha                                                                        |
| 132              | E9Q8I0           | 45                   | 153            | 53.8                  | 1252   | 141271 | 7.1 | Complement factor H                                                                                    |
| 133              | P14618           | 45                   | 2032           | 80.4                  | 531    | 57937  | 7.8 | Uncharacterized protein                                                                                |
| 134              | Q13200           | 45                   | 211            | 65.6                  | 908    | 100200 | 5.2 | Pyruvate kinase isozymes M1/M2                                                                         |
| 135              | B7ZLV8           | 45                   | 61             | 51.1                  | 1265   | 140599 | 5.5 | 26S proteasome non-ATPase regulatory subunit 2                                                         |
| 135              | Q99707           | 45                   | 61             | 51.1                  | 1265   | 140527 | 5.6 | 5-methyltetrahydrofolate-cysteine methyltransferase                                                    |
| 136              | P41252           | 45                   | 61             | 46.9                  | 1262   | 144498 | 6.1 | Methionine synthase                                                                                    |
| 137              | P19096           | 44                   | 119            | 25.6                  | 2504   | 272426 | 6.6 | Isoleucyl-tRNA synthetase, cytoplasmic                                                                 |
|                  |                  |                      |                |                       |        |        |     | Fatty acid synthase                                                                                    |

Table S1. Proteins identified in the OVCAR-3 tumor supernatant by two or more unique peptides.

| Protein or Group | Accession Number | Unique Peptide Count | Spectrum Count | Sequence Coverage (%) | Length | MolWt  | pI  | Descriptive Name                                                                                                                                                                                                                                                                    |
|------------------|------------------|----------------------|----------------|-----------------------|--------|--------|-----|-------------------------------------------------------------------------------------------------------------------------------------------------------------------------------------------------------------------------------------------------------------------------------------|
| 138              | Q9Y678           | 44                   | 305            | 69.9                  | 874    | 97718  | 5.5 | Coatomeer subunit gamma                                                                                                                                                                                                                                                             |
| 139              | P53618           | 44                   | 357            | 60.5                  | 953    | 107142 | 6   | Coatomeer subunit beta                                                                                                                                                                                                                                                              |
| 140              | Q14997           | 44                   | 65             | 33.4                  | 1843   | 211332 | 6.9 | Proteasome activator complex subunit 4                                                                                                                                                                                                                                              |
| 141              | Q1HE25           | 43                   | 525            | 80.5                  | 914    | 105568 | 5.4 | Actinin alpha 1 isoform b                                                                                                                                                                                                                                                           |
| 142              | P35221           | 43                   | 496            | 66.3                  | 906    | 100071 | 6.3 | Catenin alpha-1                                                                                                                                                                                                                                                                     |
| 143              | Q14697-2         | 43                   | 204            | 63.9                  | 966    | 109438 | 6.2 | Isoform 2 of Neutral alpha-glucosidase AB                                                                                                                                                                                                                                           |
| 144              | E9PLK3           | 43                   | 267            | 62.2                  | 915    | 102988 | 5.6 | Uncharacterized protein                                                                                                                                                                                                                                                             |
| 144              | P55786           | 43                   | 267            | 61.9                  | 919    | 103276 | 5.7 | Puromycin-sensitive aminopeptidase                                                                                                                                                                                                                                                  |
| 145              | P49588           | 43                   | 138            | 61.8                  | 968    | 106810 | 5.5 | Alanyl-tRNA synthetase, cytoplasmic                                                                                                                                                                                                                                                 |
| 146              | E9PEZ3           | 43                   | 147            | 46.5                  | 1269   | 141061 | 5.4 | Uncharacterized protein                                                                                                                                                                                                                                                             |
| 146              | UPI0001AE73A7    | 43                   | 147            | 46.4                  | 1272   | 141386 | 5.4 | Protein diaphanous log 1 (Diaphanous-related formin-1) (DRF1).                                                                                                                                                                                                                      |
| 146              | Q6URC4           | 43                   | 147            | 46.4                  | 1272   | 141303 | 5.5 | Diaphanous 1                                                                                                                                                                                                                                                                        |
| 146              | Q60610           | 43                   | 147            | 46.4                  | 1272   | 141347 | 5.4 | Protein diaphanous log 1                                                                                                                                                                                                                                                            |
| 147              | E9PYU6           | 42                   | 135            | 12.6                  | 4854   | 529426 | 6.1 | Uncharacterized protein                                                                                                                                                                                                                                                             |
| 147              | Q88738           | 42                   | 135            | 12.6                  | 4845   | 528429 | 6.1 | Ubiquitin-conjugating enzyme                                                                                                                                                                                                                                                        |
| 148              | P35606           | 42                   | 192            | 69.4                  | 906    | 102487 | 5.3 | Coatomeer subunit beta'                                                                                                                                                                                                                                                             |
| 149              | P22102           | 42                   | 217            | 57.6                  | 1010   | 107767 | 6.7 | Trifunctional purine biosynthetic protein adenosine-3                                                                                                                                                                                                                               |
| 149              | Q3B7A7           | 42                   | 217            | 57.6                  | 1010   | 107723 | 6.8 | Phosphoribosylglycinamide formyltransferase, phosphoribosylglycinamide synthetase, phosphoribosylaminoimidazole synthetase, phosphoribosylglycinamide formyltransferase, phosphoribosylglycinamide synthetase, phosphoribosylaminoimidazole synthetase isoform 1 variant (Fragment) |
| 149              | Q59HH3           | 42                   | 217            | 55.6                  | 1046   | 112138 | 7.4 | (Fragment)                                                                                                                                                                                                                                                                          |
| 150              | P00450           | 42                   | 215            | 51.8                  | 1065   | 122205 | 5.7 | Ceruloplasmin                                                                                                                                                                                                                                                                       |
| 151              | Q60841           | 42                   | 122            | 41.1                  | 1220   | 138827 | 5.5 | Eukaryotic translation initiation factor 5B                                                                                                                                                                                                                                         |
| 152              | P26358           | 42                   | 89             | 32.4                  | 1616   | 183164 | 7.8 | DNA (cytosine-5)-methyltransferase 1                                                                                                                                                                                                                                                |
| 153              | Q15393           | 41                   | 98             | 50.3                  | 1217   | 135577 | 5.3 | Splicing factor 3B subunit 3                                                                                                                                                                                                                                                        |
| 153              | Q921M3           | 41                   | 98             | 50.3                  | 1217   | 135550 | 5.3 | Splicing factor 3B subunit 3                                                                                                                                                                                                                                                        |
| 154              | Q3UBU0           | 41                   | 240            | 52.4                  | 802    | 92476  | 4.8 | Putative uncharacterized protein                                                                                                                                                                                                                                                    |
| 155              | E9QQ49           | 41                   | 59             | 38.9                  | 1551   | 176433 | 5.6 | Uncharacterized protein                                                                                                                                                                                                                                                             |
| 156              | P26639           | 41                   | 188            | 65.6                  | 723    | 83435  | 6.7 | Threonyl-tRNA synthetase, cytoplasmic                                                                                                                                                                                                                                               |
| 156              | Q53GX7           | 41                   | 188            | 65.6                  | 723    | 83445  | 6.7 | Threonyl-tRNA synthetase variant (Fragment)                                                                                                                                                                                                                                         |
| 157              | Q92598           | 41                   | 139            | 64.9                  | 858    | 96865  | 5.4 | Heat shock protein 105 kDa                                                                                                                                                                                                                                                          |
| 158              | Q9UIA9           | 41                   | 169            | 51                    | 1087   | 123907 | 6.3 | Exportin-7                                                                                                                                                                                                                                                                          |
| 158              | E7ESC6           | 41                   | 169            | 50.9                  | 1088   | 124066 | 6.5 | Uncharacterized protein                                                                                                                                                                                                                                                             |
| 159              | B2R5V9           | 41                   | 159            | 46.5                  | 1268   | 141379 | 6.9 | cDNA, FLJ92652, highly similar to sapiens high density lipoprotein binding protein (vigilin)(HDLBP), mRNA                                                                                                                                                                           |
| 160              | Q7L576           | 41                   | 93             | 39.2                  | 1253   | 145182 | 6.9 | Cytoplasmic FMR1-interacting protein 1                                                                                                                                                                                                                                              |
| 161              | Q75116           | 41                   | 50             | 39.1                  | 1388   | 160899 | 6   | Rho-associated protein kinase 2                                                                                                                                                                                                                                                     |
| 162              | Q92673           | 41                   | 44             | 24.7                  | 2214   | 248425 | 5.6 | Sortilin-related receptor                                                                                                                                                                                                                                                           |
| 163              | A1BN54           | 40                   | 480            | 78.4                  | 887    | 102720 | 5.5 | Alpha actinin 1a                                                                                                                                                                                                                                                                    |
| 164              | P52480           | 40                   | 1548           | 76.8                  | 531    | 57845  | 7.5 | Pyruvate kinase isozymes M1/M2                                                                                                                                                                                                                                                      |
| 165              | Q3TXV1           | 40                   | 187            | 62.7                  | 908    | 100145 | 5.2 | Putative uncharacterized protein                                                                                                                                                                                                                                                    |
| 165              | Q8VDM4           | 40                   | 187            | 62.7                  | 908    | 100203 | 5.2 | 26S proteasome non-ATPase regulatory subunit 2                                                                                                                                                                                                                                      |
| 166              | E9QAI5           | 40                   | 71             | 26.4                  | 2162   | 236247 | 6.5 | Uncharacterized protein                                                                                                                                                                                                                                                             |
| 166              | B2RQC6           | 40                   | 71             | 25.7                  | 2225   | 243236 | 6.4 | Carbamoyl-phosphate synthetase 2, aspartate transcarbamylase, and dihydroorotase                                                                                                                                                                                                    |
| 167              | Q10567-3         | 40                   | 214            | 58.8                  | 939    | 103564 | 5.2 | Isoform C of AP-1 complex subunit beta-1                                                                                                                                                                                                                                            |
| 168              | Q8TEX9           | 40                   | 282            | 57.8                  | 1081   | 118715 | 5   | Importin-4                                                                                                                                                                                                                                                                          |
| 168              | Q8TEX9-2         | 40                   | 282            | 57.7                  | 1083   | 118901 | 4.9 | Isoform 2 of Importin-4                                                                                                                                                                                                                                                             |
| 169              | P10586-2         | 40                   | 53             | 32.2                  | 1898   | 211685 | 6.4 | Isoform 2 of Receptor-type tyrosine-protein phosphatase F                                                                                                                                                                                                                           |
| 169              | P10586           | 40                   | 53             | 32                    | 1907   | 212877 | 6.3 | Receptor-type tyrosine-protein phosphatase F                                                                                                                                                                                                                                        |
| 170              | P45974-2         | 39                   | 193            | 58.6                  | 835    | 93308  | 5.1 | Isoform Short of Ubiquitin carboxyl-terminal hydrolase 5                                                                                                                                                                                                                            |
| 171              | A0AVT1           | 39                   | 96             | 53.2                  | 1052   | 117970 | 6.1 | Ubiquitin-like modifier-activating enzyme 6                                                                                                                                                                                                                                         |
| 172              | P33176           | 39                   | 140            | 48.4                  | 963    | 109685 | 6.5 | Kinesin-1 heavy chain                                                                                                                                                                                                                                                               |
| 173              | Q9P2J5           | 39                   | 89             | 48                    | 1176   | 134466 | 7.3 | Leucyl-tRNA synthetase, cytoplasmic                                                                                                                                                                                                                                                 |
| 174              | Q9NTJ3           | 39                   | 48             | 39.2                  | 1288   | 147182 | 6.8 | Structural maintenance of chromosomes protein 4                                                                                                                                                                                                                                     |
| 175              | Q3TMY8           | 38                   | 132            | 61.1                  | 971    | 109361 | 5   | Putative uncharacterized protein                                                                                                                                                                                                                                                    |
| 176              | B9EHR3           | 38                   | 58             | 32.2                  | 1560   | 173089 | 5.4 | Tenascin N                                                                                                                                                                                                                                                                          |
| 176              | Q8OZ71           | 38                   | 58             | 32.2                  | 1560   | 173115 | 5.4 | Tenascin-N                                                                                                                                                                                                                                                                          |
| 177              | A2ALW0           | 38                   | 93             | 30.1                  | 1840   | 203702 | 7.1 | Novel protein containing 10 HEAT domains                                                                                                                                                                                                                                            |
| 177              | Q6PDI5-2         | 38                   | 93             | 30.1                  | 1840   | 203927 | 7.2 | Isoform 2 of Proteasome-associated protein ECM29 homolog                                                                                                                                                                                                                            |
| 177              | Q6PDI5           | 38                   | 93             | 30.1                  | 1840   | 203716 | 7.1 | Proteasome-associated protein ECM29 homolog                                                                                                                                                                                                                                         |
| 177              | E9QKS7           | 38                   | 93             | 30.1                  | 1840   | 203913 | 7.2 | Uncharacterized protein                                                                                                                                                                                                                                                             |
| 178              | B4DE59           | 38                   | 909            | 76.7                  | 563    | 62616  | 5.2 | cDNA FLJ60424, highly similar to Junction plakoglobin                                                                                                                                                                                                                               |
| 179              | B2R6D0           | 38                   | 105            | 56.9                  | 953    | 105838 | 5.4 | cDNA, FLJ92896, highly similar to sapiens proteasome (prosome, macropain) 26S subunit, non-ATPase, 1 (PSMD1), mRNA                                                                                                                                                                  |
| 179              | Q99460           | 38                   | 105            | 56.9                  | 953    | 105836 | 5.4 | 26S proteasome non-ATPase regulatory subunit 1                                                                                                                                                                                                                                      |
| 180              | P11216           | 38                   | 126            | 56.9                  | 843    | 96696  | 6.9 | Glycogen phosphorylase, brain form                                                                                                                                                                                                                                                  |
| 181              | Q14566           | 38                   | 220            | 52.7                  | 821    | 92889  | 5.4 | DNA replication licensing factor MCM6                                                                                                                                                                                                                                               |
| 182              | B4E0E1           | 38                   | 163            | 47.3                  | 993    | 111127 | 8.9 | cDNA FLJ53442, highly similar to Poly (ADP-ribose) polymerase 1 (EC 2.4.2.30)                                                                                                                                                                                                       |
| 182              | P09874           | 38                   | 163            | 46.4                  | 1014   | 113084 | 8.9 | Poly [ADP-ribose] polymerase 1                                                                                                                                                                                                                                                      |
| 183              | B4DIM0           | 38                   | 96             | 43.8                  | 1145   | 125137 | 8.2 | cDNA FLJ56442, highly similar to ATP-citrate synthase (EC 2.3.3.8)                                                                                                                                                                                                                  |
| 184              | Q9H2G2           | 38                   | 77             | 41                    | 1235   | 142695 | 5.1 | STE20-like serine/threonine-protein kinase                                                                                                                                                                                                                                          |
| 185              | A7E2Y5           | 38                   | 54             | 23                    | 2243   | 254451 | 6.8 | DnaJ (Hsp40) log. subfamily C, member 13                                                                                                                                                                                                                                            |
| 185              | Q75165           | 38                   | 54             | 23                    | 2243   | 254412 | 6.7 | DnaJ log subfamily C member 13                                                                                                                                                                                                                                                      |
| 186              | Q3TXG4           | 37                   | 194            | 55.4                  | 943    | 103935 | 5.2 | Adaptor protein complex AP-1, beta 1 subunit, isoform CRA_b                                                                                                                                                                                                                         |
| 186              | Q8CC13           | 37                   | 194            | 54.8                  | 953    | 104998 | 5.1 | Putative uncharacterized protein                                                                                                                                                                                                                                                    |
| 187              | Q02053           | 37                   | 364            | 50.4                  | 1058   | 117809 | 5.7 | Ubiquitin-like modifier-activating enzyme 1                                                                                                                                                                                                                                         |
| 188              | B9EIU1           | 37                   | 76             | 31                    | 1512   | 169962 | 7.6 | Glutamyl-prolyl-tRNA synthetase                                                                                                                                                                                                                                                     |
| 188              | Q8CGC7           | 37                   | 76             | 31                    | 1512   | 170052 | 7.7 | Bifunctional aminoacyl-tRNA synthetase                                                                                                                                                                                                                                              |
| 188              | E9QKC4           | 37                   | 76             | 31                    | 1512   | 170078 | 7.7 | Uncharacterized protein                                                                                                                                                                                                                                                             |
| 189              | Q96910           | 37                   | 1440           | 85.5                  | 365    | 41108  | 5   | KRT8 protein (Fragment)                                                                                                                                                                                                                                                             |
| 190              | P13010           | 37                   | 381            | 68.3                  | 732    | 82705  | 5.8 | X-ray repair cross-complementing protein 5                                                                                                                                                                                                                                          |
| 191              | P47897           | 37                   | 137            | 62.7                  | 775    | 87799  | 7.2 | Glutamyl-tRNA synthetase                                                                                                                                                                                                                                                            |
| 192              | P07384           | 37                   | 220            | 61.9                  | 714    | 81890  | 5.7 | Calpain-1 catalytic subunit                                                                                                                                                                                                                                                         |
| 193              | B2R7C5           | 37                   | 151            | 58.5                  | 808    | 91009  | 5.8 | cDNA, FLJ93378, highly similar to sapiens MCM3 minichromosome maintenance deficient 3 (S. cerevisiae) (MCM3), mRNA                                                                                                                                                                  |
| 193              | Q53HJ4           | 37                   | 151            | 58.5                  | 808    | 90981  | 5.7 | Minichromosome maintenance protein 3 variant (Fragment)                                                                                                                                                                                                                             |
| 193              | P25205           | 37                   | 151            | 58.5                  | 808    | 90981  | 5.8 | DNA replication licensing factor MCM3                                                                                                                                                                                                                                               |
| 194              | B4DLA6           | 37                   | 160            | 55.7                  | 823    | 92722  | 7   | cDNA FLJ54365, highly similar to DNA replication licensing factor MCM4                                                                                                                                                                                                              |
| 194              | B3KMX0           | 37                   | 160            | 53.1                  | 863    | 96604  | 6.7 | cDNA FLJ12837 fis, clone NT2RP2003228, highly similar to DNA replication licensing factor MCM4                                                                                                                                                                                      |
| 195              | B7Z815           | 37                   | 70             | 49.3                  | 1086   | 126269 | 5.7 | Ubiquitin carboxyl-terminal hydrolase 5                                                                                                                                                                                                                                             |
| 195              | Q93009           | 37                   | 70             | 48.5                  | 1102   | 128302 | 5.6 | Ubiquitin carboxyl-terminal hydrolase 7                                                                                                                                                                                                                                             |
| 196              | B2R721           | 37                   | 79             | 38.8                  | 1019   | 117811 | 6.6 | cDNA, FLJ93240, highly similar to sapiens insulin-degrading enzyme (IDE), mRNA                                                                                                                                                                                                      |

Table S1. Proteins identified in the OVCAR-3 tumor supernatant by two or more unique peptides.

| Protein or Group | Accession Number | Unique Peptide Count | Spectrum Count | Sequence Coverage (%) | Length | MolWt  | pI  | Descriptive Name                                                                                                                                             |
|------------------|------------------|----------------------|----------------|-----------------------|--------|--------|-----|--------------------------------------------------------------------------------------------------------------------------------------------------------------|
| 196              | P14735           | 37                   | 79             | 38.8                  | 1019   | 117968 | 6.6 | Insulin-degrading enzyme                                                                                                                                     |
| 197              | P24928           | 37                   | 72             | 27.5                  | 1970   | 217174 | 7.4 | DNA-directed RNA polymerase II subunit RPB1                                                                                                                  |
| 198              | P20918           | 36                   | 198            | 63.4                  | 812    | 90782  | 6.6 | Plasminogen                                                                                                                                                  |
| 199              | Q9QZ5E           | 36                   | 259            | 60.5                  | 874    | 97513  | 5.3 | Coatomeer subunit gamma                                                                                                                                      |
| 199              | E9Q5P4           | 36                   | 259            | 60.3                  | 877    | 97958  | 5.5 | Uncharacterized protein                                                                                                                                      |
| 200              | P97927           | 36                   | 96             | 26.7                  | 1816   | 201818 | 6.2 | Laminin subunit alpha-4                                                                                                                                      |
| 201              | E5RKB6           | 36                   | 42             | 19.8                  | 2571   | 276470 | 6.6 | FELE-1                                                                                                                                                       |
| 201              | UPI000019347C    | 36                   | 42             | 19.8                  | 2571   | 276471 | 6.6 | stabilin-1 precursor                                                                                                                                         |
| 202              | E9Q555           | 36                   | 60             | 9.3                   | 5150   | 584506 | 6.8 | Uncharacterized protein                                                                                                                                      |
| 203              | P49915           | 36                   | 190            | 73                    | 693    | 76715  | 6.9 | GMP synthase [glutamine-hydrolyzing]                                                                                                                         |
| 204              | P50990           | 36                   | 70             | 70.1                  | 548    | 59621  | 5.6 | T-complex protein 1 subunit theta                                                                                                                            |
| 205              | P49321           | 36                   | 162            | 65.5                  | 788    | 85238  | 4.3 | Nuclear autoantigenic sperm protein<br>cDNA, FLJ95650, highly similar to sapiens karyopherin (importin)                                                      |
| 206              | B2RBR9           | 36                   | 455            | 62                    | 876    | 97184  | 4.8 | beta 1 (KPNB1), mRNA                                                                                                                                         |
| 206              | Q14974           | 36                   | 455            | 62                    | 876    | 97170  | 4.8 | Importin subunit beta-1                                                                                                                                      |
| 207              | E7EOR4           | 36                   | 525            | 57.3                  | 586    | 69372  | 6.2 | Uncharacterized protein                                                                                                                                      |
| 207              | Q6NUR7           | 36                   | 525            | 57.3                  | 586    | 69242  | 6.3 | Ezrin                                                                                                                                                        |
| 207              | P15311           | 36                   | 525            | 57.3                  | 586    | 69413  | 6.3 | Ezrin                                                                                                                                                        |
| 208              | Q8WUM4           | 36                   | 178            | 50.2                  | 868    | 96023  | 6.5 | Programmed cell death 6-interacting protein                                                                                                                  |
| 209              | O95373           | 36                   | 413            | 47                    | 1038   | 119516 | 4.8 | Importin-7                                                                                                                                                   |
| 210              | Q13308           | 36                   | 84             | 46.4                  | 1070   | 118392 | 7.1 | Inactive tyrosine-protein kinase 7                                                                                                                           |
| 210              | B7Z477           | 36                   | 84             | 46.1                  | 1078   | 119225 | 7   | cDNA FLJ55335, highly similar to Tyrosine-protein kinase-like 7                                                                                              |
| 210              | E9PFZ5           | 36                   | 84             | 46.1                  | 1078   | 119197 | 7   | Uncharacterized protein                                                                                                                                      |
| 211              | Q15020           | 36                   | 58             | 44.3                  | 963    | 109935 | 5.6 | Squamous cell carcinoma antigen recognized by T-cells 3                                                                                                      |
| 212              | O43847           | 36                   | 76             | 40.3                  | 1150   | 131571 | 5   | Nardilysin                                                                                                                                                   |
| 212              | B1AKJ5           | 36                   | 76             | 38.1                  | 1219   | 139413 | 5   | Nardilysin (N-arginine dibasic convertase)                                                                                                                   |
| 212              | O43847-2         | 36                   | 76             | 38.1                  | 1218   | 139284 | 5   | Isoform 2 of Nardilysin                                                                                                                                      |
| 213              | P35556           | 36                   | 51             | 16.8                  | 2912   | 314775 | 4.9 | Fibrillin-2                                                                                                                                                  |
| 214              | O75533           | 35                   | 183            | 43.1                  | 1304   | 145830 | 7.1 | Splicing factor 3B subunit 1                                                                                                                                 |
| 214              | Q99NB9           | 35                   | 183            | 43.1                  | 1304   | 145816 | 7.1 | Splicing factor 3B subunit 1                                                                                                                                 |
| 215              | P10493           | 35                   | 101            | 38.9                  | 1245   | 136623 | 5.5 | Nidogen-1                                                                                                                                                    |
| 215              | Q3TKX9           | 35                   | 101            | 38.9                  | 1245   | 136538 | 5.4 | Nidogen 1                                                                                                                                                    |
| 216              | Q3V1M8           | 35                   | 125            | 36.8                  | 1268   | 141742 | 6.9 | Putative uncharacterized protein                                                                                                                             |
| 216              | Q8VDJ3           | 35                   | 125            | 36.8                  | 1268   | 141742 | 6.9 | Vigilin                                                                                                                                                      |
| 217              | P00558           | 35                   | 539            | 76.7                  | 417    | 44615  | 8.1 | Phosphoglycerate kinase 1                                                                                                                                    |
| 218              | O60763           | 35                   | 218            | 52.6                  | 962    | 107895 | 4.9 | General vesicular transport factor p115                                                                                                                      |
| 219              | P27816-6         | 35                   | 193            | 44.5                  | 1135   | 119958 | 6.2 | Isoform 6 of Microtubule-associated protein 4                                                                                                                |
| 219              | P27816           | 35                   | 193            | 43.8                  | 1152   | 121005 | 5.4 | Microtubule-associated protein 4<br>Phosphoribosylformylglycinamide synthase (FGAR amidotransferase), isoform CRA_b                                          |
| 220              | A8K8N7           | 35                   | 46             | 43.3                  | 1338   | 144724 | 5.8 | SWI/SNF-related matrix-associated actin-dependent regulator of chromatin subfamily A member 5                                                                |
| 221              | O60264           | 35                   | 81             | 34.8                  | 1052   | 121905 | 8.1 | chromatin subfamily A member 5                                                                                                                               |
| 222              | Q13576           | 35                   | 41             | 30.5                  | 1575   | 180577 | 5.6 | Ras GTPase-activating-like protein IQGAP2                                                                                                                    |
| 222              | UPI0000E56ECC    | 35                   | 41             | 30.5                  | 1575   | 180578 | 5.6 | ras GTPase-activating-like protein IQGAP2                                                                                                                    |
| 223              | Q8IWW7           | 35                   | 48             | 25.4                  | 1749   | 200209 | 6   | E3 ubiquitin-protein ligase UBR1                                                                                                                             |
| 224              | P42345           | 35                   | 62             | 21.8                  | 2549   | 288890 | 7.2 | Serine/threonine-protein kinase mTOR                                                                                                                         |
| 225              | Q3TFE8           | 34                   | 438            | 59.5                  | 875    | 97113  | 4.8 | Putative uncharacterized protein                                                                                                                             |
| 225              | O6GTI5           | 34                   | 438            | 59.5                  | 876    | 97184  | 4.8 | Karyopherin (Importin) beta 1                                                                                                                                |
| 226              | O55029           | 34                   | 174            | 55.9                  | 905    | 102449 | 5.3 | Coatomeer subunit beta'                                                                                                                                      |
| 227              | A2AVJ7           | 34                   | 170            | 27.6                  | 1464   | 158395 | 9.2 | Ribosome binding protein 1                                                                                                                                   |
| 227              | Q99PL5           | 34                   | 170            | 25.2                  | 1605   | 172878 | 9.3 | Ribosome-binding protein 1                                                                                                                                   |
| 228              | P08238           | 34                   | 478            | 72                    | 724    | 83264  | 5   | Heat shock protein HSP 90-beta                                                                                                                               |
| 229              | Q92973-2         | 34                   | 142            | 56.6                  | 890    | 101310 | 5   | Isoform 2 of Transportin-1                                                                                                                                   |
| 230              | P55884           | 34                   | 147            | 56.1                  | 814    | 92482  | 5   | Eukaryotic translation initiation factor 3 subunit B                                                                                                         |
| 230              | E7EME9           | 34                   | 147            | 52.4                  | 872    | 98916  | 5.1 | Uncharacterized protein                                                                                                                                      |
| 230              | P55884-2         | 34                   | 147            | 52.3                  | 873    | 99029  | 5.1 | Isoform 2 of Eukaryotic translation initiation factor 3 subunit B                                                                                            |
| 231              | P11586           | 34                   | 81             | 52.3                  | 935    | 101559 | 7.3 | C-1-tetrahydrofolate synthase, cytoplasmic                                                                                                                   |
| 232              | P49736           | 34                   | 154            | 46.3                  | 904    | 101896 | 5.5 | DNA replication licensing factor MCM2                                                                                                                        |
| 233              | Q01970           | 34                   | 59             | 40.7                  | 1234   | 138799 | 5.9 | 1-phosphatidylinositol-4,5-bisphosphate phosphodiesterase beta-3                                                                                             |
| 234              | Q94979           | 34                   | 250            | 34.3                  | 1220   | 133015 | 6.9 | Protein transport protein Sec31A                                                                                                                             |
| 234              | D6REX3           | 34                   | 250            | 33.4                  | 1251   | 136226 | 7   | Uncharacterized protein                                                                                                                                      |
| 235              | P35222           | 33                   | 327            | 60.7                  | 781    | 85497  | 5.9 | Catenin beta-1                                                                                                                                               |
| 235              | Q3UZT7           | 33                   | 327            | 60.7                  | 781    | 85497  | 5.9 | Putative uncharacterized protein                                                                                                                             |
| 235              | Q02248           | 33                   | 327            | 60.7                  | 781    | 85471  | 5.9 | Catenin beta-1                                                                                                                                               |
| 236              | P63017           | 33                   | 600            | 73.4                  | 646    | 70871  | 5.5 | Heat shock cognate 71 kDa protein                                                                                                                            |
| 236              | Q3UBA6           | 33                   | 600            | 73.4                  | 646    | 70899  | 5.6 | Putative uncharacterized protein                                                                                                                             |
| 236              | Q3TQ13           | 33                   | 600            | 73.4                  | 646    | 70871  | 5.5 | Putative uncharacterized protein                                                                                                                             |
| 236              | Q3TH56           | 33                   | 600            | 73.4                  | 646    | 70872  | 5.4 | Putative uncharacterized protein                                                                                                                             |
| 237              | P20152           | 33                   | 343            | 70.4                  | 466    | 53688  | 5.1 | Vimentin                                                                                                                                                     |
| 238              | P26041           | 33                   | 270            | 59.3                  | 577    | 67767  | 6.6 | Moesin                                                                                                                                                       |
| 239              | Q61316           | 33                   | 184            | 49.6                  | 841    | 94133  | 5.2 | Heat shock 70 kDa protein 4                                                                                                                                  |
| 239              | Q571M2           | 33                   | 184            | 44.8                  | 930    | 103260 | 5.9 | MKIAA4025 protein (Fragment)                                                                                                                                 |
| 240              | Q7TPT7           | 33                   | 77             | 37.2                  | 1263   | 140229 | 7.8 | Valyl-tRNA synthetase                                                                                                                                        |
| 240              | Q9Z1Q9           | 33                   | 77             | 37.2                  | 1263   | 140215 | 7.8 | Valyl-tRNA synthetase                                                                                                                                        |
| 241              | E9QNV4           | 33                   | 63             | 14.6                  | 3105   | 342781 | 6.1 | Uncharacterized protein                                                                                                                                      |
| 241              | UPI0000E6A55D    | 33                   | 63             | 14.5                  | 3118   | 343815 | 6.1 | laminin subunit alpha-2                                                                                                                                      |
| 242              | Q92499           | 33                   | 197            | 63.4                  | 740    | 82432  | 7.2 | ATP-dependent RNA helicase DDX1<br>cDNA, FLJ94025, highly similar to sapiens tripartite motif-containing 28 (TRIM28), mRNA                                   |
| 243              | B2R8R5           | 33                   | 307            | 58.9                  | 835    | 88560  | 5.8 | Transcription intermediary factor 1-beta                                                                                                                     |
| 243              | Q13263           | 33                   | 307            | 58.9                  | 835    | 88550  | 5.8 | cDNA, FLJ94921, highly similar to sapiens prolyl endopeptidase (PREP), mRNA                                                                                  |
| 244              | B2RAH7           | 33                   | 86             | 55.5                  | 710    | 80734  | 5.9 | Prolyl endopeptidase                                                                                                                                         |
| 244              | Q9UM02           | 33                   | 86             | 55.5                  | 710    | 80734  | 5.9 | Prolyl endopeptidase                                                                                                                                         |
| 244              | P48147           | 33                   | 86             | 55.5                  | 710    | 80700  | 5.9 | Prolyl endopeptidase                                                                                                                                         |
| 245              | P11021           | 33                   | 204            | 53.2                  | 654    | 72333  | 5.2 | 78 kDa glucose-regulated protein<br>cDNA, FLJ95468, highly similar to sapiens transcriptional coactivator tubedown-100 (TBDN100), transcript variant 1, mRNA |
| 246              | B2RBE5           | 33                   | 107            | 43.1                  | 866    | 101300 | 7.4 | N-alpha-acetyltransferase 15, NatA auxiliary subunit                                                                                                         |
| 246              | Q9BXJ9           | 33                   | 107            | 43.1                  | 866    | 101272 | 7.4 | N-alpha-acetyltransferase 15, NatA auxiliary subunit                                                                                                         |
| 247              | Q9P2R3           | 33                   | 52             | 40.7                  | 1169   | 128399 | 6.1 | Ankyrin repeat and FYVE domain-containing protein 1                                                                                                          |
| 248              | Q9Y2A7           | 33                   | 69             | 40.5                  | 1128   | 128790 | 6.6 | Nck-associated protein 1                                                                                                                                     |
| 248              | Q9Y2A7-2         | 33                   | 69             | 40.3                  | 1134   | 129517 | 6.7 | Isoform 2 of Nck-associated protein 1                                                                                                                        |
| 249              | P29144           | 33                   | 38             | 38.1                  | 1249   | 138349 | 6.3 | Tripeptidyl-peptidase 2                                                                                                                                      |
| 250              | Q92626           | 33                   | 64             | 34.8                  | 1479   | 165274 | 7.2 | Peroxidase log                                                                                                                                               |
| 251              | Q7Z406           | 33                   | 49             | 25.2                  | 1995   | 227868 | 5.6 | Myosin-14                                                                                                                                                    |
| 251              | E9PHG4           | 33                   | 49             | 25.1                  | 2003   | 228663 | 5.6 | Uncharacterized protein                                                                                                                                      |
| 251              | UPI0000551C8C    | 33                   | 49             | 24.8                  | 2028   | 231214 | 5.6 | Myosin-14 (Myosin heavy chain 14) (Myosin heavy chain, nonmuscle IIc) (Nonmuscle myosin heavy chain IIc) (NMHC II-C).                                        |
| 251              | Q7Z406-2         | 33                   | 49             | 24.7                  | 2036   | 232009 | 5.6 | Isoform 2 of Myosin-14                                                                                                                                       |
| 252              | Q13085-2         | 33                   | 38             | 19.2                  | 2288   | 259684 | 6.6 | Isoform 2 of Acetyl-CoA carboxylase 1                                                                                                                        |
| 252              | Q13085           | 33                   | 38             | 18.7                  | 2346   | 265551 | 6.4 | Acetyl-CoA carboxylase 1                                                                                                                                     |
| 253              | O54882           | 32                   | 137            | 48.9                  | 942    | 104669 | 6.5 | PK-120                                                                                                                                                       |

Table S1. Proteins identified in the OVCAR-3 tumor supernatant by two or more unique peptides.

| Protein or Protein Group | Accession Number | Unique Peptide Count | Spectrum Count | Sequence Coverage (%) | Length | MolWt  | pI  | Descriptive Name                                                                                                        |
|--------------------------|------------------|----------------------|----------------|-----------------------|--------|--------|-----|-------------------------------------------------------------------------------------------------------------------------|
| 253                      | Q8C7G9           | 32                   | 137            | 48.9                  | 942    | 104660 | 6.4 | Inter alpha-trypsin inhibitor, heavy chain 4                                                                            |
| 253                      | Q505P8           | 32                   | 137            | 48.9                  | 942    | 104703 | 6.5 | Inter alpha-trypsin inhibitor, heavy chain 4                                                                            |
| 254                      | Q3U7X9           | 32                   | 94             | 48.3                  | 938    | 104051 | 6.8 | Putative uncharacterized protein                                                                                        |
| 254                      | Q6PEE6           | 32                   | 94             | 48.3                  | 938    | 104002 | 6.8 | Adaptor protein complex AP-2, alpha 2 subunit                                                                           |
| 254                      | Q69ZW4           | 32                   | 94             | 46.8                  | 967    | 107342 | 8.3 | MKIAA0899 protein (Fragment)                                                                                            |
| 255                      | Q3V117           | 32                   | 76             | 37.1                  | 1101   | 120795 | 7.4 | ATP citrate lyase                                                                                                       |
| 256                      | Q2HZ94           | 32                   | 39             | 28.5                  | 1456   | 164981 | 6.8 | Macrophage mannose receptor 1                                                                                           |
| 256                      | Q61830           | 32                   | 39             | 28.5                  | 1456   | 165066 | 6.9 | Macrophage mannose receptor 1                                                                                           |
| 257                      | E9PVC5           | 32                   | 304            | 24.2                  | 1594   | 175458 | 5.4 | Uncharacterized protein                                                                                                 |
| 258                      | Q53EM5           | 32                   | 194            | 74.6                  | 623    | 67906  | 7.8 | Transketolase variant (Fragment)                                                                                        |
| 258                      | P29401           | 32                   | 194            | 74.6                  | 623    | 67878  | 7.7 | Transketolase                                                                                                           |
| 258                      | B4DE31           | 32                   | 194            | 73.7                  | 631    | 68742  | 7.7 | cDNA FLJ54957, highly similar to Transketolase (EC 2.2.1.1)                                                             |
| 258                      | E7EPA7           | 32                   | 194            | 73.7                  | 631    | 68814  | 7.5 | Uncharacterized protein                                                                                                 |
| 259                      | B7Z373           | 32                   | 289            | 66.8                  | 742    | 81941  | 5.8 | Gelsolin (Amyloidosis, Finnish type), isoform CRA_b                                                                     |
| 259                      | B7Z9A0           | 32                   | 289            | 65.7                  | 755    | 83103  | 5.8 | cDNA FLJ56212, highly similar to Gelsolin                                                                               |
| 259                      | P06396           | 32                   | 289            | 63.4                  | 782    | 85697  | 6.3 | Gelsolin                                                                                                                |
| 260                      | Q96TA1           | 32                   | 168            | 63.6                  | 733    | 82683  | 6.2 | Niban-like protein 1                                                                                                    |
| 260                      | Q5VVW7           | 32                   | 168            | 62.5                  | 746    | 84138  | 6.2 | Chromosome 9 open reading frame 88, isoform CRA_c                                                                       |
| 261                      | P42224           | 32                   | 99             | 60.5                  | 750    | 87335  | 6.1 | Signal transducer and activator of transcription 1-alpha/beta                                                           |
| 262                      | P12966           | 32                   | 237            | 59.9                  | 609    | 69843  | 6.6 | X-ray repair cross-complementing factor 6                                                                               |
| 263                      | Q96QK1           | 32                   | 147            | 54.6                  | 796    | 91707  | 5.5 | Vacuolar protein sorting-associated protein 35                                                                          |
| 264                      | P21399           | 32                   | 77             | 49.6                  | 889    | 98399  | 6.7 | Cytoplasmic asconitase                                                                                                  |
| 265                      | Q96P70           | 32                   | 188            | 43.4                  | 1041   | 115963 | 4.8 | Importin-9                                                                                                              |
| 266                      | A8K8S9           | 32                   | 70             | 41.6                  | 1173   | 133335 | 6.1 | cDNA FLJ78424, highly similar to sapiens ubiquitination factor E4B (UFD2 log, yeast) (UBE4B), mRNA                      |
| 266                      | O95155-2         | 32                   | 70             | 41.6                  | 1173   | 133275 | 6.1 | Isoform 2 of Ubiquitin conjugation factor E4 B                                                                          |
| 266                      | O95155           | 32                   | 70             | 37.5                  | 1302   | 146184 | 6.6 | Ubiquitin conjugation factor E4 B                                                                                       |
| 267                      | Q9HM29           | 32                   | 57             | 36.6                  | 1393   | 155984 | 5.6 | Rab3 GTPase-activating protein non-catalytic subunit                                                                    |
| 268                      | Q9C0C2           | 32                   | 124            | 27.4                  | 1729   | 181795 | 4.9 | 182 kDa tankyrase-1-binding protein                                                                                     |
| 269                      | E1P647           | 31                   | 138            | 47                    | 935    | 104336 | 5.5 | Adaptor-related protein complex 2, beta 1 subunit, isoform CRA_b                                                        |
| 269                      | Q9DBG3           | 31                   | 138            | 46.9                  | 937    | 104583 | 5.4 | AP-2 complex subunit beta                                                                                               |
| 269                      | P63010           | 31                   | 138            | 46.9                  | 937    | 104553 | 5.4 | AP-2 complex subunit beta                                                                                               |
| 269                      | E1P646           | 31                   | 138            | 46.3                  | 949    | 105476 | 5.4 | Adaptor-related protein complex 2, beta 1 subunit, isoform CRA_d                                                        |
| 269                      | A8K916           | 31                   | 138            | 46.2                  | 951    | 105702 | 5.3 | cDNA FLJ78481, highly similar to sapiens adaptor-related protein complex 2, beta 1 subunit, mRNA                        |
| 269                      | Q5SWR1           | 31                   | 138            | 46.2                  | 951    | 105722 | 5.3 | Adaptor-related protein complex 2, beta 1 subunit                                                                       |
| 269                      | Q3ZB97           | 31                   | 138            | 46.2                  | 951    | 105692 | 5.3 | Adaptor-related protein complex 2, beta 1 subunit, isoform CRA_b                                                        |
| 270                      | Q99K51           | 31                   | 108            | 61.3                  | 630    | 70742  | 5.6 | Plastin-3                                                                                                               |
| 270                      | B1AX58           | 31                   | 108            | 60.4                  | 639    | 71746  | 5.6 | Plastin 3 (T-isoform)                                                                                                   |
| 271                      | E9QKZ2           | 31                   | 137            | 42.6                  | 1040   | 115951 | 4.8 | Uncharacterized protein                                                                                                 |
| 271                      | Q91YE6           | 31                   | 137            | 42.6                  | 1041   | 116052 | 4.8 | Importin-9                                                                                                              |
| 272                      | Q14AX9           | 31                   | 74             | 29.3                  | 1479   | 167045 | 6   | Mannose receptor, C type 2                                                                                              |
| 272                      | Q64449           | 31                   | 74             | 29.3                  | 1479   | 167093 | 6   | C-type mannose receptor 2                                                                                               |
| 273                      | B8JJN0           | 31                   | 127            | 28.4                  | 1276   | 142325 | 7.4 | Complement component 2 (Within H-2S)                                                                                    |
| 274                      | P11142           | 31                   | 535            | 73.4                  | 646    | 70898  | 5.5 | Heat shock cognate 71 kDa protein                                                                                       |
| 275                      | P13797           | 31                   | 109            | 61.3                  | 630    | 70811  | 5.6 | Plastin-3                                                                                                               |
| 276                      | Q06J23           | 31                   | 68             | 56.6                  | 767    | 86471  | 6.8 | tRNA (cytosine-5)-methyltransferase NSUN2                                                                               |
| 277                      | Q9HCB6           | 31                   | 273            | 50.2                  | 807    | 90974  | 6.1 | Spondin-1                                                                                                               |
| 277                      | UPI00001AEF58    | 31                   | 273            | 50.2                  | 806    | 90903  | 6.1 | Spondin-1 precursor (F-spondin) (Vascular smooth muscle cell growth-promoting factor)                                   |
| 278                      | E7ESQ4           | 31                   | 100            | 47.3                  | 932    | 103307 | 7.4 | Uncharacterized protein                                                                                                 |
| 278                      | O94973           | 31                   | 100            | 47                    | 939    | 103960 | 7   | AP-2 complex subunit alpha-2                                                                                            |
| 278                      | O94973-2         | 31                   | 100            | 46.9                  | 940    | 104089 | 6.9 | Isoform 2 of AP-2 complex subunit alpha-2                                                                               |
| 279                      | A8K2U2           | 31                   | 69             | 42.9                  | 917    | 102359 | 6.1 | cDNA FLJ75392, highly similar to sapiens hexokinase II (HKII) mRNA                                                      |
| 279                      | P52789           | 31                   | 69             | 42.9                  | 917    | 102380 | 6.1 | Hexokinase-2                                                                                                            |
| 280                      | A8K5Y7           | 31                   | 78             | 41.3                  | 1204   | 136310 | 5.9 | cDNA FLJ78655, highly similar to sapiens exportin 5 (XPO5), mRNA                                                        |
| 280                      | Q9HAV4           | 31                   | 78             | 41.3                  | 1204   | 136311 | 5.8 | Exportin-5                                                                                                              |
| 280                      | C9J4N8           | 31                   | 78             | 41.3                  | 1204   | 136295 | 5.8 | Uncharacterized protein                                                                                                 |
| 281                      | P47989           | 31                   | 48             | 40.7                  | 1333   | 146424 | 7.7 | Xanthine dehydrogenase/oxidase                                                                                          |
| 282                      | P42285           | 31                   | 75             | 40.3                  | 1042   | 117805 | 6.5 | Superkiller viralicidic activity 2-like 2                                                                               |
| 283                      | Q9NZB2           | 31                   | 131            | 36.6                  | 1118   | 121888 | 8.9 | Constitutive coactivator of PPAR-gamma-like protein 1                                                                   |
| 283                      | Q9NZB2-6         | 31                   | 131            | 35.7                  | 1146   | 125272 | 9   | Isoform F of Constitutive coactivator of PPAR-gamma-like protein 1                                                      |
| 284                      | P30622-2         | 31                   | 42             | 28.8                  | 1392   | 156781 | 5.4 | Isoform 3 of CAP-Gly domain-containing linker protein 1                                                                 |
| 285                      | Q6PGP7           | 31                   | 38             | 26.1                  | 1564   | 175485 | 7.5 | Tetratricopeptide repeat protein 37                                                                                     |
| 286                      | Q9UPU5           | 31                   | 57             | 17                    | 2620   | 294364 | 6.1 | Ubiquitin carboxyl-terminal hydrolase 24                                                                                |
| 287                      | Q61598           | 30                   | 85             | 75.1                  | 445    | 50537  | 6.2 | Rab GDP dissociation inhibitor beta                                                                                     |
| 287                      | Q3UPA3           | 30                   | 85             | 65.2                  | 512    | 57737  | 8   | Putative uncharacterized protein (Fragment)                                                                             |
| 288                      | P20029           | 30                   | 130            | 53.1                  | 655    | 72422  | 5.2 | 78 kDa glucose-regulated protein                                                                                        |
| 288                      | Q3U9G2           | 30                   | 130            | 53.1                  | 655    | 72406  | 5.2 | Putative uncharacterized protein                                                                                        |
| 288                      | Q3TKF8           | 30                   | 130            | 53.1                  | 655    | 72350  | 5.2 | Putative uncharacterized protein                                                                                        |
| 288                      | Q3TI47           | 30                   | 130            | 53.1                  | 655    | 72346  | 5.2 | Putative uncharacterized protein                                                                                        |
| 289                      | O88307           | 30                   | 30             | 17.2                  | 2215   | 247120 | 5.6 | Sortilin-related receptor                                                                                               |
| 289                      | Q3UHM3           | 30                   | 30             | 17.2                  | 2215   | 247085 | 5.5 | Putative uncharacterized protein                                                                                        |
| 290                      | Q63870           | 30                   | 33             | 15.3                  | 2944   | 295229 | 6.3 | Collagen alpha-1(VII) chain                                                                                             |
| 291                      | E9PYH0           | 30                   | 82             | 10.7                  | 3354   | 366895 | 4.6 | Uncharacterized protein                                                                                                 |
| 291                      | E9QQ15           | 30                   | 82             | 10.7                  | 3353   | 366530 | 4.6 | Uncharacterized protein                                                                                                 |
| 292                      | P06733           | 30                   | 1387           | 80                    | 434    | 47169  | 7.4 | Alpha-enolase                                                                                                           |
| 293                      | P50395           | 30                   | 98             | 73                    | 445    | 50663  | 6.5 | Rab GDP dissociation inhibitor beta                                                                                     |
| 293                      | B4DLV7           | 30                   | 98             | 72.4                  | 449    | 51154  | 8.2 | cDNA FLJ60299, highly similar to Rab GDP dissociation inhibitor beta                                                    |
| 293                      | E7EU23           | 30                   | 98             | 72.4                  | 449    | 51181  | 8.2 | Uncharacterized protein                                                                                                 |
| 294                      | A8K202           | 30                   | 98             | 71.1                  | 591    | 64510  | 6.7 | 5-aminoimidazole-4-carboxamide ribonucleotide formyltransferase/IMP cyclohydrolase, isoform CRA_g                       |
| 295                      | P08107           | 30                   | 449            | 70                    | 641    | 70052  | 5.6 | Heat shock 70 kDa protein 1A/1B                                                                                         |
| 296                      | B3KU10           | 30                   | 149            | 67.2                  | 662    | 75404  | 6   | cDNA FLJ39036 fis, clone NT2RP7008360, highly similar to Interferon-induced GTP-binding protein Mx1                     |
| 297                      | Q9H4A4           | 30                   | 118            | 63.1                  | 650    | 72596  | 5.8 | Aminopeptidase B                                                                                                        |
| 298                      | A8K690           | 30                   | 158            | 55.4                  | 543    | 62655  | 6.8 | cDNA FLJ76863, highly similar to sapiens stress-induced-phosphoprotein 1 (Hsp70/Hsp90-organizing protein) (STIP1), mRNA |
| 298                      | P31948           | 30                   | 158            | 55.4                  | 543    | 62639  | 6.8 | Stress-induced-phosphoprotein 1                                                                                         |
| 299                      | P54136           | 30                   | 88             | 54.5                  | 660    | 75379  | 6.7 | Arginyl-tRNA synthetase, cytoplasmic                                                                                    |
| 300                      | Q6PCE3           | 30                   | 101            | 54.2                  | 622    | 70442  | 7.2 | Glucose 1,6-bisphosphate synthase                                                                                       |
| 301                      | P13667           | 30                   | 132            | 51.9                  | 645    | 72933  | 5.1 | Protein disulfide-isomerase A4                                                                                          |
| 302                      | Q5HYE4           | 30                   | 78             | 47.2                  | 831    | 94638  | 6.8 | Cysteinyl-tRNA synthetase, isoform CRA_e                                                                                |
| 303                      | Q14CX7           | 30                   | 48             | 43.3                  | 972    | 112292 | 6.6 | N-alpha-acetyltransferase 25, NatB auxiliary subunit                                                                    |
| 304                      | Q9Y5B9           | 30                   | 76             | 36.8                  | 1047   | 119914 | 5.7 | FACT complex subunit SPT16                                                                                              |

Table S1. Proteins identified in the OVCAR-3 tumor supernatant by two or more unique peptides.

| Protein or Protein Group | Accession Number | Unique Peptide Count | Spectrum Count | Sequence Coverage (%) | Length | MolWt  | pI  | Descriptive Name                                                                                     |
|--------------------------|------------------|----------------------|----------------|-----------------------|--------|--------|-----|------------------------------------------------------------------------------------------------------|
| 305                      | A8K084           | 30                   | 34             | 33.5                  | 1197   | 135596 | 8.4 | cDNA FLJ78259                                                                                        |
| 305                      | O95347           | 30                   | 34             | 33.5                  | 1197   | 135656 | 8.4 | Structural maintenance of chromosomes protein 2                                                      |
| 306                      | P46939           | 30                   | 60             | 12.1                  | 3433   | 394467 | 5.3 | Utrophin                                                                                             |
| 307                      | Q6GU23           | 29                   | 78             | 61.1                  | 722    | 83126  | 7.1 | Signal transducer and activator of transcription 3                                                   |
| 307                      | P40763           | 29                   | 78             | 57.3                  | 770    | 88068  | 6.3 | Signal transducer and activator of transcription 3                                                   |
| 307                      | Q3ULI4           | 29                   | 78             | 57.3                  | 770    | 88082  | 6.4 | Putative uncharacterized protein                                                                     |
| 307                      | Q3U5Q4           | 29                   | 78             | 57.3                  | 770    | 88068  | 6.4 | Putative uncharacterized protein                                                                     |
| 307                      | P42227           | 29                   | 78             | 57.3                  | 770    | 88054  | 6.3 | Signal transducer and activator of transcription 3                                                   |
| 308                      | P09411           | 29                   | 400            | 69.8                  | 417    | 44550  | 7.9 | Phosphoglycerate kinase 1                                                                            |
| 309                      | Q9D0R2           | 29                   | 120            | 45.4                  | 722    | 83356  | 7.4 | Threonyl-tRNA synthetase, cytoplasmic                                                                |
| 310                      | Q3TGL4           | 29                   | 136            | 30.9                  | 1174   | 126498 | 4.6 | Fibulin 2, isoform CRA_b                                                                             |
| 310                      | UPI0000F0A5D2    | 29                   | 136            | 29.7                  | 1221   | 131834 | 4.7 | fibulin-2 isoform a                                                                                  |
| 311                      | UPI0000F59908    | 29                   | 35             | 27.4                  | 1388   | 160615 | 6   | rho-associated protein kinase 2                                                                      |
| 311                      | P70336           | 29                   | 35             | 27.4                  | 1388   | 160585 | 6   | Rho-associated protein kinase 2                                                                      |
| 311                      | A5XDA7           | 29                   | 35             | 26.4                  | 1444   | 166759 | 5.9 | ROCK2 splice variant (Fragment)                                                                      |
| 311                      | E9PYM9           | 29                   | 35             | 26.4                  | 1445   | 166877 | 5.9 | Uncharacterized protein                                                                              |
| 312                      | Q13228           | 29                   | 71             | 82.2                  | 472    | 52391  | 6.4 | Selenium-binding protein 1                                                                           |
| 312                      | E9PE02           | 29                   | 71             | 75.5                  | 514    | 56866  | 6.5 | Uncharacterized protein                                                                              |
| 313                      | O75083           | 29                   | 78             | 71.9                  | 606    | 66194  | 6.7 | WD repeat-containing protein 1                                                                       |
| 314                      | P08670           | 29                   | 236            | 63.7                  | 466    | 53652  | 5.1 | Vimentin                                                                                             |
| 315                      | Q15436           | 29                   | 94             | 63.7                  | 765    | 86161  | 7.1 | Protein transport protein Sec23A                                                                     |
| 316                      | O00429-2         | 29                   | 141            | 60                    | 725    | 80536  | 6.7 | Isoform 4 of Dynamin-1-like protein                                                                  |
| 316                      | Q59GN9           | 29                   | 141            | 57.9                  | 751    | 83579  | 7.7 | Dynamin-like protein DYNIV-11 variant (Fragment)                                                     |
| 317                      | P11940           | 29                   | 309            | 53.1                  | 636    | 70671  | 9.5 | Polyadenylate-binding protein 1                                                                      |
| 317                      | Q5R8F7           | 29                   | 309            | 53.1                  | 636    | 70643  | 9.5 | Polyadenylate-binding protein 1                                                                      |
| 318                      | P33992           | 29                   | 68             | 48.1                  | 734    | 82286  | 8.4 | DNA replication licensing factor MCM5                                                                |
| 319                      | Q12906           | 29                   | 119            | 44.4                  | 894    | 95339  | 8.8 | Interleukin enhancer-binding factor 3                                                                |
| 319                      | UPI000059D66A    | 29                   | 119            | 44.2                  | 898    | 95808  | 8.8 | interleukin enhancer-binding factor 3 isoform d                                                      |
| 320                      | E9PHY5           | 29                   | 63             | 41.5                  | 935    | 104360 | 5.4 | Uncharacterized protein                                                                              |
| 321                      | P15144           | 29                   | 40             | 39.1                  | 967    | 109539 | 5.5 | Aminopeptidase N                                                                                     |
| 321                      | Q59E93           | 29                   | 40             | 38.7                  | 977    | 110593 | 5.5 | Membrane alanine aminopeptidase variant (Fragment)                                                   |
| 322                      | Q9HC35           | 29                   | 93             | 38                    | 981    | 108916 | 6.4 | Echinoderm microtubule-associated protein-like 4                                                     |
| 323                      | Q9BTW9           | 29                   | 45             | 37.7                  | 1192   | 132600 | 6.2 | Tubulin-specific chaperone D                                                                         |
| 323                      | Q9BTW9-4         | 29                   | 45             | 36                    | 1248   | 138669 | 6.4 | Isoform 4 of Tubulin-specific chaperone D                                                            |
| 324                      | O60271-4         | 29                   | 34             | 33                    | 1307   | 144681 | 5.2 | Isoform 4 of C-Jun-amino-terminal kinase-interacting protein 4                                       |
| 324                      | D6RC32           | 29                   | 34             | 32.9                  | 1312   | 145263 | 5.2 | Uncharacterized protein                                                                              |
| 324                      | O60271-2         | 29                   | 34             | 32.9                  | 1311   | 145135 | 5.2 | Isoform 2 of C-Jun-amino-terminal kinase-interacting protein 4                                       |
| 325                      | Q92900-2         | 29                   | 53             | 32.2                  | 1118   | 123036 | 6.7 | Isoform 2 of Regulator of nonsense transcripts 1                                                     |
| 325                      | Q92900           | 29                   | 53             | 31.9                  | 1129   | 124345 | 6.6 | Regulator of nonsense transcripts 1                                                                  |
| 326                      | A6NEM2           | 29                   | 68             | 20                    | 2080   | 213474 | 7.3 | Uncharacterized protein                                                                              |
| 327                      | Q8VHM5           | 28                   | 108            | 52.4                  | 632    | 70888  | 8.1 | Heterogeneous nuclear ribonucleoprotein R                                                            |
| 327                      | Q3UMT8           | 28                   | 108            | 52.4                  | 632    | 70916  | 8.1 | Putative uncharacterized protein                                                                     |
| 327                      | Q3U8W9           | 28                   | 108            | 52.4                  | 632    | 70878  | 8.1 | Putative uncharacterized protein                                                                     |
| 327                      | O43390           | 28                   | 108            | 52.3                  | 633    | 70943  | 8.1 | Heterogeneous nuclear ribonucleoprotein R                                                            |
| 328                      | P13020           | 28                   | 192            | 59.9                  | 780    | 85942  | 6.2 | Gelsolin                                                                                             |
| 329                      | Q8JZQ9           | 28                   | 112            | 41.5                  | 803    | 91370  | 5   | Eukaryotic translation initiation factor 3 subunit B                                                 |
| 329                      | E9PX78           | 28                   | 112            | 34.4                  | 969    | 108836 | 5.5 | Uncharacterized protein                                                                              |
| 329                      | Q8CJL3           | 28                   | 112            | 34.3                  | 970    | 108983 | 5.5 | Eif3b protein                                                                                        |
| 330                      | Q8BKG3           | 28                   | 65             | 33.8                  | 1062   | 117532 | 6.9 | Inactive tyrosine-protein kinase 7                                                                   |
| 331                      | P00338           | 28                   | 803            | 83.7                  | 332    | 36689  | 8.3 | L-lactate dehydrogenase A chain                                                                      |
| 332                      | P04075           | 28                   | 382            | 83.2                  | 364    | 39420  | 8.1 | Fructose-bisphosphate aldolase A                                                                     |
| 333                      | O60701           | 28                   | 80             | 69.4                  | 494    | 55024  | 7.1 | UDP-glucose 6-dehydrogenase                                                                          |
| 334                      | P36871           | 28                   | 74             | 66.7                  | 562    | 61449  | 6.8 | Phosphoglucomutase-1                                                                                 |
| 335                      | B5BUB5           | 28                   | 163            | 58.8                  | 408    | 46867  | 7.1 | Autoantigen La (Fragment)                                                                            |
| 335                      | P05455           | 28                   | 163            | 58.8                  | 408    | 46837  | 7.1 | Lupus La protein                                                                                     |
| 336                      | Q00839           | 28                   | 299            | 45.2                  | 825    | 90585  | 6   | Heterogeneous nuclear ribonucleoprotein U                                                            |
| 337                      | O94874           | 28                   | 105            | 42.7                  | 794    | 89595  | 6.8 | E3 UFM1-protein ligase 1                                                                             |
| 338                      | Q5GLZ8-2         | 28                   | 40             | 42.7                  | 1049   | 117697 | 6.3 | Isoform 2 of Probable E3 ubiquitin-protein ligase HERC4                                              |
| 338                      | Q5GLZ8           | 28                   | 40             | 42.4                  | 1057   | 118563 | 6.2 | Probable E3 ubiquitin-protein ligase HERC4                                                           |
| 339                      | O95786           | 28                   | 45             | 41.2                  | 925    | 106600 | 6.4 | Probable ATP-dependent RNA helicase DDX58                                                            |
| 340                      | P22059           | 28                   | 67             | 38.9                  | 807    | 89421  | 7.3 | Oxysterol-binding protein 1                                                                          |
| 341                      | B4DVO5           | 28                   | 129            | 38.2                  | 898    | 103645 | 5.5 | factor 3 subunit 8                                                                                   |
| 341                      | A1KYQ7           | 28                   | 129            | 37.6                  | 913    | 105404 | 5.7 | Cell migration-inducing protein 17                                                                   |
| 341                      | Q99613           | 28                   | 129            | 37.6                  | 913    | 105344 | 5.7 | Eukaryotic translation initiation factor 3 subunit C                                                 |
| 342                      | Q14126           | 28                   | 98             | 35                    | 1118   | 122294 | 5.2 | Desmoglein-2                                                                                         |
| 343                      | C9J6D7           | 28                   | 45             | 28.2                  | 1310   | 146826 | 6.2 | Uncharacterized protein                                                                              |
| 343                      | O75153           | 28                   | 45             | 28.2                  | 1309   | 146669 | 6.1 | Protein KIAA0664                                                                                     |
| 344                      | E9PM46           | 28                   | 35             | 27.1                  | 1355   | 154697 | 5.1 | Uncharacterized protein                                                                              |
| 345                      | Q5VW36           | 28                   | 34             | 23.7                  | 1801   | 200071 | 6.6 | Uncharacterized protein KIAA1797                                                                     |
| 346                      | Q3TFG3           | 27                   | 209            | 79.3                  | 406    | 46182  | 5.5 | Putative uncharacterized protein                                                                     |
| 347                      | Q8K0E8           | 27                   | 100            | 67.8                  | 481    | 54753  | 7.1 | Fibrinogen beta chain                                                                                |
| 348                      | E9Q1S3           | 27                   | 91             | 59.2                  | 736    | 82956  | 7.5 | Uncharacterized protein                                                                              |
| 348                      | Q01405           | 27                   | 91             | 57                    | 765    | 86162  | 7.1 | Protein transport protein Sec23A                                                                     |
| 349                      | D3YY36           | 27                   | 63             | 57.9                  | 622    | 68601  | 7.9 | Uncharacterized protein                                                                              |
| 349                      | Q9DBD0           | 27                   | 63             | 51.4                  | 700    | 76766  | 7.2 | Putative uncharacterized protein                                                                     |
| 350                      | Q920B9           | 27                   | 59             | 31.2                  | 1047   | 119825 | 5.7 | FACT complex subunit SPT16                                                                           |
| 350                      | UPI0000026527    | 27                   | 59             | 31.2                  | 1047   | 119839 | 5.7 | FACT complex subunit SPT16                                                                           |
| 351                      | P26641           | 27                   | 277            | 77.6                  | 437    | 50119  | 6.7 | Elongation factor 1-gamma                                                                            |
| 351                      | B4DTG2           | 27                   | 277            | 69.6                  | 487    | 56150  | 7.7 | cDNA FLJ56389, highly similar to Elongation factor 1-gamma                                           |
| 352                      | P28838-2         | 27                   | 79             | 73.8                  | 488    | 52771  | 6.7 | Isoform 2 of Cytosol aminopeptidase                                                                  |
| 352                      | P28838           | 27                   | 79             | 69.4                  | 519    | 56166  | 7.9 | Cytosol aminopeptidase                                                                               |
| 353                      | B3KQT9           | 27                   | 100            | 64                    | 480    | 54103  | 7.2 | cDNA PSEC0175 fis, clone OVARC1000169, highly similar to Protein disulfide-isomerase A3 (EC 5.3.4.1) |
| 353                      | P30101           | 27                   | 100            | 60.8                  | 505    | 56782  | 6.4 | Protein disulfide-isomerase A3                                                                       |
| 354                      | P17858           | 27                   | 111            | 53.8                  | 780    | 85018  | 7.5 | 6-phosphofructokinase, liver type                                                                    |
| 355                      | B2RBA6           | 27                   | 83             | 46.6                  | 719    | 81280  | 6.5 | mRNA                                                                                                 |
| 355                      | P33993           | 27                   | 83             | 46.6                  | 719    | 81308  | 6.5 | DNA replication licensing factor MCM7                                                                |
| 356                      | O43719           | 27                   | 49             | 46.2                  | 755    | 85853  | 4.4 | HIV Tat-specific factor 1                                                                            |
| 357                      | P23246           | 27                   | 281            | 43.8                  | 707    | 76150  | 9.4 | Splicing factor, proline- and glutamine-rich                                                         |
| 358                      | O43592           | 27                   | 70             | 41.5                  | 962    | 109964 | 5.4 | Exportin-T                                                                                           |
| 359                      | A8QI98           | 27                   | 32             | 39.2                  | 958    | 109058 | 7.1 | DIS3                                                                                                 |
| 360                      | Q5JSH3           | 27                   | 31             | 38.9                  | 913    | 101366 | 5.5 | WD repeat-containing protein 44                                                                      |
| 361                      | A8K2P8           | 27                   | 84             | 38.1                  | 901    | 99934  | 5.3 | cDNA FLJ76245, highly similar to sapiens desmocollin 2 (DSC2), transcript variant Dsc2a, mRNA        |
| 361                      | Q02487           | 27                   | 84             | 38.1                  | 901    | 99962  | 5.3 | Desmocollin-2                                                                                        |
| 361                      | A9X9L0           | 27                   | 84             | 38.1                  | 901    | 99950  | 5.3 | Desmocollin 2                                                                                        |
| 361                      | B4DLJ5           | 27                   | 84             | 37.6                  | 912    | 101083 | 5.3 | cDNA FLJ55716, highly similar to Desmocollin-2                                                       |
| 361                      | E9PHQ8           | 27                   | 84             | 37.5                  | 914    | 101400 | 5.3 | Uncharacterized protein                                                                              |
| 362                      | Q9Y3P9           | 27                   | 33             | 30.6                  | 1069   | 121737 | 5.3 | Rab GTPase-activating protein 1                                                                      |
| 363                      | Q8TAQ2-2         | 27                   | 128            | 28.7                  | 1130   | 124841 | 5.6 | Isoform 2 of SWI/SNF complex subunit SMARCC2                                                         |

Table S1. Proteins identified in the OVCAR-3 tumor supernatant by two or more unique peptides.

| Protein or Protein Group | Accession Number | Unique Peptide Count | Spectrum Count | Sequence Coverage (%) | Length | MolWt  | pI  | Descriptive Name                                                                                                                                             |
|--------------------------|------------------|----------------------|----------------|-----------------------|--------|--------|-----|--------------------------------------------------------------------------------------------------------------------------------------------------------------|
| 363                      | Q59G16           | 27                   | 128            | 28                    | 1156   | 127377 | 5.5 | SWI/SNF-related matrix-associated actin-dependent regulator of chromatin c2 isoform b variant (Fragment)                                                     |
| 363                      | Q59GV3           | 27                   | 128            | 27.8                  | 1164   | 128088 | 5.6 | SWI/SNF-related matrix-associated actin-dependent regulator of chromatin c2 isoform b variant (Fragment)                                                     |
| 363                      | Q8TAQ2           | 27                   | 128            | 26.7                  | 1214   | 132879 | 5.7 | SWI/SNF complex subunit SMARCC2                                                                                                                              |
| 364                      | Q9D8N0           | 26                   | 221            | 76.4                  | 437    | 50061  | 6.7 | Elongation factor 1-gamma                                                                                                                                    |
| 365                      | P27773           | 26                   | 83             | 58                    | 505    | 56678  | 6.2 | Protein disulfide-isomerase A3                                                                                                                               |
| 366                      | Q61702           | 26                   | 150            | 41.9                  | 907    | 101083 | 7   | Inter-alpha-trypsin inhibitor heavy chain H1                                                                                                                 |
| 366                      | Q91WU7           | 26                   | 150            | 41.8                  | 909    | 101343 | 7.3 | Inter-alpha trypsin inhibitor, heavy chain 1 (Fragment)                                                                                                      |
| 367                      | Q3UGT5           | 26                   | 79             | 38.6                  | 843    | 96672  | 6.8 | Phosphorylase                                                                                                                                                |
| 367                      | Q8CI94           | 26                   | 79             | 38.6                  | 843    | 96730  | 6.7 | Glycogen phosphorylase, brain form                                                                                                                           |
| 367                      | Q3V3U0           | 26                   | 79             | 38.6                  | 843    | 96716  | 6.7 | Phosphorylase                                                                                                                                                |
| 367                      | Q3UYH9           | 26                   | 79             | 38.6                  | 843    | 96762  | 6.7 | Phosphorylase                                                                                                                                                |
| 368                      | B2RUJ7           | 26                   | 33             | 27                    | 1335   | 146560 | 7.6 | Xanthine dehydrogenase                                                                                                                                       |
| 368                      | Q00519           | 26                   | 33             | 27                    | 1335   | 146518 | 7.6 | Xanthine dehydrogenase/oxidase                                                                                                                               |
| 368                      | E9QLM9           | 26                   | 33             | 27                    | 1335   | 146562 | 7.6 | Uncharacterized protein                                                                                                                                      |
| 369                      | P35441           | 26                   | 75             | 26.5                  | 1170   | 129647 | 5   | Thrombospondin-1                                                                                                                                             |
| 369                      | Q8CGB2           | 26                   | 75             | 26.5                  | 1171   | 129718 | 5   | Thrombospondin 1                                                                                                                                             |
| 370                      | E9QJZ4           | 26                   | 34             | 13.2                  | 2907   | 313818 | 4.8 | Uncharacterized protein                                                                                                                                      |
| 371                      | Q96KP4           | 26                   | 80             | 73.9                  | 475    | 52878  | 6   | Cytosolic non-specific dipeptidase                                                                                                                           |
| 372                      | Q9NTK5           | 26                   | 62             | 73.7                  | 396    | 44744  | 7.8 | Obg-like ATPase 1                                                                                                                                            |
| 373                      | Q9Y230           | 26                   | 59             | 65.4                  | 463    | 51157  | 5.6 | RuvB-like 2                                                                                                                                                  |
| 374                      | E7ES34           | 26                   | 402            | 59.6                  | 445    | 48975  | 5.4 | Uncharacterized protein                                                                                                                                      |
| 375                      | Q9NY33           | 26                   | 115            | 59                    | 737    | 82589  | 5.1 | Dipeptidyl peptidase 3                                                                                                                                       |
| 375                      | UPI0000EE4697    | 26                   | 115            | 57.5                  | 757    | 84376  | 5   | UPI0000EE4697 UniRef100 entry                                                                                                                                |
| 376                      | P07237           | 26                   | 120            | 55.7                  | 508    | 57116  | 4.9 | Protein disulfide-isomerase                                                                                                                                  |
| 377                      | Q43242           | 26                   | 53             | 54.5                  | 534    | 60978  | 8.4 | 26S proteasome non-ATPase regulatory subunit 3                                                                                                               |
| 377                      | Q6IBNO           | 26                   | 53             | 54.5                  | 534    | 60946  | 8.4 | PSMD3 protein                                                                                                                                                |
| 378                      | B4E0X8           | 26                   | 231            | 51.2                  | 629    | 66232  | 7.6 | cDNA FLJ61021, highly similar to Far upstream element-binding protein 1                                                                                      |
| 379                      | P56192           | 26                   | 60             | 39.9                  | 900    | 101116 | 6.2 | Methionyl-tRNA synthetase, cytoplasmic                                                                                                                       |
| 380                      | P52272-2         | 26                   | 161            | 40.2                  | 691    | 73621  | 8.8 | Isoform 2 of Heterogeneous nuclear ribonucleoprotein M                                                                                                       |
| 380                      | P52272           | 26                   | 161            | 38.1                  | 730    | 77516  | 8.7 | Heterogeneous nuclear ribonucleoprotein M                                                                                                                    |
| 381                      | E9PMZ9           | 26                   | 87             | 38.3                  | 827    | 92409  | 4.6 | Uncharacterized protein                                                                                                                                      |
| 381                      | E9PKF6           | 26                   | 87             | 37.8                  | 838    | 93733  | 4.6 | Uncharacterized protein                                                                                                                                      |
| 381                      | Q5H9R7-6         | 26                   | 87             | 37.6                  | 844    | 94445  | 4.6 | Isoform 6 of Serine/threonine-protein phosphatase 6 regulatory subunit 3                                                                                     |
| 381                      | Q5H9R7-2         | 26                   | 87             | 36.6                  | 867    | 96957  | 4.6 | Isoform 2 of Serine/threonine-protein phosphatase 6 regulatory subunit 3                                                                                     |
| 381                      | Q5H9R7           | 26                   | 87             | 36.3                  | 873    | 97669  | 4.6 | Serine/threonine-protein phosphatase 6 regulatory subunit 3                                                                                                  |
| 381                      | Q5H9R7-5         | 26                   | 87             | 36.1                  | 879    | 98485  | 4.6 | Isoform 5 of Serine/threonine-protein phosphatase 6 regulatory subunit 3                                                                                     |
| 382                      | Q95163           | 26                   | 29             | 29.1                  | 1332   | 150254 | 5.9 | Elongation complex protein 1                                                                                                                                 |
| 383                      | Q14112-2         | 26                   | 54             | 26.6                  | 1274   | 140866 | 5.3 | Isoform 2 of Nidogen-2                                                                                                                                       |
| 383                      | Q14112           | 26                   | 54             | 24.7                  | 1375   | 151254 | 5.3 | Nidogen-2                                                                                                                                                    |
| 384                      | Q92878           | 26                   | 51             | 21.2                  | 1312   | 153892 | 6.9 | DNA repair protein RAD50                                                                                                                                     |
| 384                      | Q92878-2         | 26                   | 51             | 21.1                  | 1318   | 154587 | 6.9 | Isoform 2 of DNA repair protein RAD50                                                                                                                        |
| 385                      | P07942           | 26                   | 100            | 17.4                  | 1786   | 198037 | 4.9 | Laminin subunit beta-1                                                                                                                                       |
| 385                      | UPI0000EE4033    | 26                   | 100            | 17.1                  | 1810   | 200477 | 5   | Laminin subunit beta-1 precursor (Laminin B1 chain).                                                                                                         |
| 386                      | Q15746-4         | 26                   | 69             | 17.8                  | 1794   | 197398 | 6.5 | Isoform 3B of Myosin light chain kinase, smooth muscle                                                                                                       |
| 386                      | D3DN97           | 26                   | 69             | 17.3                  | 1845   | 203044 | 6.2 | Myosin, light polypeptide kinase, isoform CRA_d                                                                                                              |
| 386                      | Q15746-2         | 26                   | 69             | 17.3                  | 1845   | 203054 | 6.2 | Isoform 2 of Myosin light chain kinase, smooth muscle                                                                                                        |
| 386                      | Q15746-3         | 26                   | 69             | 17.1                  | 1863   | 205057 | 6.5 | Isoform 3A of Myosin light chain kinase, smooth muscle                                                                                                       |
| 386                      | Q15746-6         | 26                   | 69             | 16.7                  | 1913   | 210584 | 6.2 | Isoform Del-1790 of Myosin light chain kinase, smooth muscle                                                                                                 |
| 386                      | Q15746           | 26                   | 69             | 16.7                  | 1914   | 210713 | 6.2 | Myosin light chain kinase, smooth muscle                                                                                                                     |
| 387                      | P62258           | 25                   | 888            | 83.9                  | 255    | 29174  | 4.7 | 14-3-3 protein epsilon 14-3-3 protein epsilon                                                                                                                |
| 388                      | P07437           | 25                   | 1600           | 72.7                  | 444    | 49671  | 4.9 | Tubulin beta chain Tubulin beta chain                                                                                                                        |
| 389                      | P05064           | 25                   | 147            | 78.8                  | 364    | 39356  | 8.1 | Fructose-bisphosphate aldolase A                                                                                                                             |
| 389                      | A6Z144           | 25                   | 147            | 68.7                  | 418    | 45120  | 7.9 | Fructose-bisphosphate aldolase                                                                                                                               |
| 390                      | P32261           | 25                   | 158            | 60.4                  | 465    | 52004  | 6.5 | Antithrombin-III                                                                                                                                             |
| 391                      | Q69ZZ7           | 25                   | 150            | 48.7                  | 729    | 82055  | 6.6 | MKIAA0762 protein (Fragment)                                                                                                                                 |
| 391                      | Q8VCC9           | 25                   | 150            | 44                    | 807    | 90821  | 6   | Spondin-1                                                                                                                                                    |
| 392                      | Q91VR5           | 25                   | 157            | 48.2                  | 740    | 82500  | 7.2 | ATP-dependent RNA helicase DDX1                                                                                                                              |
| 393                      | Q9WVS5           | 25                   | 48             | 45.5                  | 547    | 59569  | 5.6 | Chaperonin containing TCP-1 theta subunit                                                                                                                    |
| 393                      | P42932           | 25                   | 48             | 45.4                  | 548    | 59556  | 5.6 | T-complex protein 1 subunit theta                                                                                                                            |
| 393                      | Q8BVY8           | 25                   | 48             | 45.4                  | 548    | 59555  | 5.8 | Putative uncharacterized protein                                                                                                                             |
| 393                      | Q3UKQ2           | 25                   | 48             | 45.4                  | 548    | 59557  | 5.5 | Putative uncharacterized protein                                                                                                                             |
| 394                      | P27546           | 25                   | 76             | 32.8                  | 1125   | 117429 | 5   | Microtubule-associated protein 4                                                                                                                             |
| 394                      | P27546-2         | 25                   | 76             | 32.8                  | 1124   | 117343 | 5   | Isoform 2 of Microtubule-associated protein 4                                                                                                                |
| 395                      | Q64514-2         | 25                   | 29             | 29.6                  | 1249   | 138463 | 6.4 | Isoform Short of Tripeptidyl-peptidase 2                                                                                                                     |
| 396                      | Q05D44           | 25                   | 88             | 28.6                  | 1216   | 137616 | 5.6 | Eukaryotic translation initiation factor 5B                                                                                                                  |
| 397                      | Q5XK22           | 25                   | 31             | 30.8                  | 1187   | 137142 | 6.4 | Ace protein (Fragment)                                                                                                                                       |
| 397                      | P09470           | 25                   | 31             | 27.9                  | 1312   | 150918 | 6.6 | Angiotensin-converting enzyme                                                                                                                                |
| 398                      | P60174           | 25                   | 436            | 92.4                  | 249    | 26669  | 6.9 | Triosephosphate isomerase                                                                                                                                    |
| 399                      | Q8IWP6           | 25                   | 776            | 72.6                  | 445    | 49753  | 4.9 | Class IVb beta tubulin                                                                                                                                       |
| 400                      | D3DPU2           | 25                   | 134            | 70.5                  | 475    | 51673  | 8   | Adenylyl cyclase-associated protein                                                                                                                          |
| 401                      | E9PC18           | 25                   | 131            | 68.2                  | 532    | 60208  | 8.5 | Uncharacterized protein                                                                                                                                      |
| 401                      | P06744           | 25                   | 131            | 65.1                  | 558    | 63147  | 8.3 | Glucose-6-phosphate isomerase                                                                                                                                |
| 402                      | P78371           | 25                   | 54             | 67.7                  | 535    | 57488  | 6.4 | T-complex protein 1 subunit beta                                                                                                                             |
| 403                      | P23526           | 25                   | 87             | 66                    | 432    | 47716  | 6.3 | Adenosylcysteinease                                                                                                                                          |
| 404                      | P68104           | 25                   | 920            | 64.9                  | 462    | 50141  | 9   | Elongation factor 1-alpha 1                                                                                                                                  |
| 404                      | Q6IPT9           | 25                   | 920            | 64.9                  | 462    | 50185  | 9.1 | Elongation factor 1-alpha                                                                                                                                    |
| 404                      | Q6IPN6           | 25                   | 920            | 64.9                  | 462    | 50123  | 9   | Elongation factor 1-alpha                                                                                                                                    |
| 404                      | Q53HR5           | 25                   | 920            | 64.9                  | 462    | 50125  | 9   | Elongation factor 1-alpha (Fragment)                                                                                                                         |
| 404                      | Q53HQ7           | 25                   | 920            | 64.9                  | 462    | 50199  | 8.9 | Elongation factor 1-alpha (Fragment)                                                                                                                         |
| 404                      | Q53HM9           | 25                   | 920            | 64.9                  | 462    | 50142  | 8.9 | Elongation factor 1-alpha (Fragment)                                                                                                                         |
| 405                      | A6NJA2           | 25                   | 60             | 64.3                  | 459    | 52386  | 5.8 | Ubiquitin carboxyl-terminal hydrolase                                                                                                                        |
| 405                      | P54578           | 25                   | 60             | 59.7                  | 494    | 56069  | 5.3 | Ubiquitin carboxyl-terminal hydrolase 14                                                                                                                     |
| 405                      | UPI00015DFA37    | 25                   | 60             | 55.5                  | 532    | 59930  | 7.6 | Ubiquitin carboxyl-terminal hydrolase 14 (EC 3.1.2.15) (Ubiquitin thioesterase 14) (Ubiquitin-specific-processing protease 14) (Deubiquitinating enzyme 14). |
| 406                      | B3KX11           | 25                   | 76             | 63                    | 522    | 57946  | 6.9 | cDNA FLJ4436 fis, clone UTERU2019706, highly similar to T-complex protein 1 subunit gamma                                                                    |
| 406                      | Q5SZY0           | 25                   | 76             | 63                    | 522    | 57972  | 6.9 | Chaperonin containing TCP1, subunit 3 (Gamma)                                                                                                                |
| 406                      | E9PAQ6           | 25                   | 76             | 60.5                  | 544    | 60463  | 6.5 | Uncharacterized protein                                                                                                                                      |
| 406                      | P49368           | 25                   | 76             | 60.4                  | 545    | 60534  | 6.5 | T-complex protein 1 subunit gamma                                                                                                                            |
| 407                      | Q02790           | 25                   | 89             | 61.7                  | 459    | 51805  | 5.4 | Peptidyl-prolyl cis-trans isomerase FKBP4                                                                                                                    |
| 408                      | P00352           | 25                   | 60             | 61.5                  | 501    | 54862  | 6.7 | Retinal dehydrogenase 1                                                                                                                                      |
| 409                      | P13798           | 25                   | 66             | 59                    | 732    | 81225  | 5.5 | Acylamino-acid-releasing enzyme                                                                                                                              |
| 409                      | C9JIF9           | 25                   | 66             | 58.6                  | 737    | 81674  | 5.5 | Uncharacterized protein                                                                                                                                      |
| 410                      | Q9UBT2           | 25                   | 109            | 57.5                  | 640    | 71224  | 5.3 | SUMO-activating enzyme subunit 2                                                                                                                             |
| 411                      | P09960           | 25                   | 94             | 57                    | 611    | 69285  | 6.2 | Leukotriene A-4 hydrolase                                                                                                                                    |
| 412                      | Q9Y262           | 25                   | 61             | 54.1                  | 564    | 66727  | 6.3 | Eukaryotic translation initiation factor 3 subunit L                                                                                                         |
| 413                      | E7EU87           | 25                   | 296            | 50.6                  | 555    | 58901  | 6   | Uncharacterized protein                                                                                                                                      |

Table S1. Proteins identified in the OVCAR-3 tumor supernatant by two or more unique peptides.

| Protein or Group | Accession Number | Unique Peptide Count | Spectrum Count | Sequence Coverage (%) | Length | MolWt  | pI  | Descriptive Name                                                                                                      |
|------------------|------------------|----------------------|----------------|-----------------------|--------|--------|-----|-----------------------------------------------------------------------------------------------------------------------|
| 414              | P78347-2         | 25                   | 52             | 37.1                  | 957    | 107970 | 7.9 | Isoform 2 of General transcription factor II-I                                                                        |
| 414              | UPI0000E0AC33    | 25                   | 52             | 36.4                  | 976    | 110035 | 7.4 | general transcription factor II-I isoform 5                                                                           |
| 414              | Q499G6           | 25                   | 52             | 36.4                  | 976    | 110080 | 7.6 | General transcription factor II, I                                                                                    |
| 414              | P78347-4         | 25                   | 52             | 36.3                  | 977    | 110106 | 7.4 | Isoform 4 of General transcription factor II-I                                                                        |
| 414              | P78347-3         | 25                   | 52             | 36.3                  | 978    | 110280 | 6.7 | Isoform 3 of General transcription factor II-I                                                                        |
| 414              | P78347           | 25                   | 52             | 35.6                  | 998    | 112416 | 6.4 | General transcription factor II-I                                                                                     |
| 415              | Q9Y6D5           | 25                   | 57             | 29.1                  | 1785   | 202037 | 6.3 | Brefeldin A-inhibited guanine nucleotide-exchange protein 2                                                           |
| 416              | C9J4D0           | 25                   | 31             | 23.1                  | 1458   | 162985 | 5.4 | Uncharacterized protein                                                                                               |
| 416              | Q08378           | 25                   | 31             | 22.5                  | 1498   | 167354 | 5.4 | Golgin subfamily A member 3                                                                                           |
| 417              | P11388           | 25                   | 37             | 21                    | 1531   | 174384 | 8.7 | DNA topoisomerase 2-alpha                                                                                             |
| 417              | P11388-2         | 25                   | 37             | 20.6                  | 1557   | 177500 | 8.8 | Isoform 2 of DNA topoisomerase 2-alpha                                                                                |
| 417              | C9J5P2           | 25                   | 37             | 20.5                  | 1568   | 178882 | 8.7 | DNA topoisomerase 2                                                                                                   |
| 417              | P11388-3         | 25                   | 37             | 20.5                  | 1567   | 178711 | 8.8 | Isoform 3 of DNA topoisomerase 2-alpha                                                                                |
| 417              | P11388-4         | 25                   | 37             | 19.9                  | 1612   | 182680 | 8.6 | Isoform 4 of DNA topoisomerase 2-alpha                                                                                |
| 418              | AS5YK6           | 25                   | 58             | 12.9                  | 2376   | 266937 | 7.1 | CCR4-NOT transcription complex subunit 1                                                                              |
| 418              | AS5YK6-2         | 25                   | 58             | 12.9                  | 2371   | 266379 | 7   | Isoform 2 of CCR4-NOT transcription complex subunit 1                                                                 |
| 419              | Q01484           | 25                   | 38             | 8.8                   | 3924   | 430259 | 5.1 | Ankyrin-2                                                                                                             |
| 420              | Q8WVW5           | 24                   | 2210           | 86.2                  | 363    | 40503  | 6.1 | Putative uncharacterized protein (Fragment)                                                                           |
| 420              | P60709           | 24                   | 2210           | 83.5                  | 375    | 41737  | 5.5 | Actin, cytoplasmic 1 Actin, cytoplasmic 1                                                                             |
| 420              | Q53G99           | 24                   | 2210           | 83.5                  | 375    | 41765  | 5.6 | Beta actin variant (Fragment)                                                                                         |
| 420              | Q3UAF7           | 24                   | 2210           | 83.5                  | 375    | 41751  | 5.5 | Putative uncharacterized protein                                                                                      |
| 420              | Q3U5R4           | 24                   | 2210           | 83.5                  | 375    | 41709  | 5.5 | Putative uncharacterized protein                                                                                      |
| 420              | P63261           | 24                   | 2210           | 83.5                  | 375    | 41793  | 5.5 | Actin, cytoplasmic 2 Actin, cytoplasmic 2                                                                             |
| 421              | Q14240           | 24                   | 264            | 72                    | 407    | 46402  | 5.5 | Eukaryotic initiation factor 4A-II Eukaryotic initiation factor 4A-II Isoform 2 of Eukaryotic initiation factor 4A-II |
| 421              | Q14240-2         | 24                   | 264            | 71.8                  | 408    | 46489  | 5.5 | Eukaryotic initiation factor 4A-II                                                                                    |
| 422              | D3YZP9           | 24                   | 135            | 53.5                  | 469    | 52939  | 7.3 | MCG115019                                                                                                             |
| 422              | Q16204           | 24                   | 135            | 53                    | 474    | 53291  | 7.3 | Coiled-coil domain-containing protein 6                                                                               |
| 422              | UPI000013D3A6    | 24                   | 135            | 43.1                  | 583    | 65774  | 7.3 | Coiled-coil domain-containing protein 6 (H4 protein) (Papillary thyroid carcinoma-encoded protein).                   |
| 423              | Q99LG2           | 24                   | 75             | 41.4                  | 887    | 100456 | 5   | Transportin-2                                                                                                         |
| 423              | Q6IN77           | 24                   | 75             | 41.4                  | 887    | 100408 | 5   | Transportin 2                                                                                                         |
| 423              | Q4LE60           | 24                   | 75             | 34.9                  | 1051   | 117677 | 5.6 | TNPO2 variant protein (Fragment)                                                                                      |
| 424              | P63101           | 24                   | 609            | 86.1                  | 245    | 27771  | 4.8 | 14-3-3 protein zeta/delta                                                                                             |
| 425              | P17182           | 24                   | 905            | 68.2                  | 434    | 47141  | 6.8 | Alpha-enolase                                                                                                         |
| 426              | Q3TJX0           | 24                   | 63             | 63.3                  | 627    | 70135  | 5.3 | Putative uncharacterized protein                                                                                      |
| 426              | Q61233           | 24                   | 63             | 63.3                  | 627    | 70149  | 5.3 | Plastin-2                                                                                                             |
| 427              | Q8QZY1           | 24                   | 53             | 52.3                  | 564    | 66613  | 6.4 | Eukaryotic translation initiation factor 3 subunit L                                                                  |
| 428              | Q9WU78           | 24                   | 137            | 33.1                  | 869    | 96010  | 6.5 | Programmed cell death 6-interacting protein                                                                           |
| 428              | Q3TED2           | 24                   | 137            | 33.1                  | 869    | 96024  | 6.5 | Programmed cell death 6 interacting protein                                                                           |
| 428              | B8JL8            | 24                   | 137            | 33                    | 874    | 96773  | 6.5 | Programmed cell death 6 interacting protein                                                                           |
| 428              | Q9WU78-3         | 24                   | 137            | 33                    | 874    | 96759  | 6.5 | Isoform 3 of Programmed cell death 6-interacting protein                                                              |
| 428              | Q80Y09           | 24                   | 137            | 33                    | 872    | 96312  | 6.5 | Pcd6ip protein                                                                                                        |
| 429              | Q3UPL0-2         | 24                   | 115            | 22.7                  | 1191   | 129564 | 7.4 | Isoform 2 of Protein transport protein Sec31A                                                                         |
| 429              | Q3UPL0           | 24                   | 115            | 22                    | 1230   | 133569 | 6.8 | Protein transport protein Sec31A                                                                                      |
| 430              | P63104           | 24                   | 615            | 86.1                  | 245    | 27745  | 4.8 | 14-3-3 protein zeta/delta                                                                                             |
| 431              | P15121           | 24                   | 136            | 77.5                  | 316    | 35853  | 7   | Aldose reductase                                                                                                      |
| 432              | P07355           | 24                   | 167            | 68.7                  | 339    | 38604  | 7.8 | Annexin A2                                                                                                            |
| 433              | P49419           | 24                   | 52             | 61.6                  | 539    | 58487  | 8   | Alpha-aminoadipic semialdehyde dehydrogenase                                                                          |
| 434              | P26038           | 24                   | 132            | 59.3                  | 577    | 67820  | 6.4 | Moesin                                                                                                                |
| 435              | P48643           | 24                   | 57             | 58.4                  | 541    | 59671  | 5.6 | T-complex protein 1 subunit epsilon                                                                                   |
| 436              | P17987           | 24                   | 49             | 58.3                  | 556    | 60344  | 6.1 | T-complex protein 1 subunit alpha                                                                                     |
| 437              | P14868           | 24                   | 59             | 58.1                  | 501    | 57136  | 6.5 | Aspartyl-tRNA synthetase, cytoplasmic                                                                                 |
| 438              | P31751           | 24                   | 65             | 57                    | 481    | 55769  | 6.4 | RAC-beta serine/threonine-protein kinase                                                                              |
| 439              | Q14651           | 24                   | 86             | 55.6                  | 629    | 70254  | 5.4 | Plastin-1                                                                                                             |
| 440              | P50895           | 24                   | 146            | 55.4                  | 628    | 67405  | 5.8 | Basal cell adhesion molecule                                                                                          |
| 441              | P38606           | 24                   | 90             | 52.7                  | 617    | 68304  | 5.5 | V-type proton ATPase catalytic subunit A                                                                              |
| 442              | B3KWV3           | 24                   | 59             | 47.9                  | 702    | 80460  | 6.3 | cDNA FLJ43930 fis, clone TEST14013441, highly similar to 1,4-alpha-glucan branching enzyme (EC 2.4.1.18)              |
| 442              | Q04446           | 24                   | 59             | 47.9                  | 702    | 80460  | 6.3 | 1,4-alpha-glucan-branching enzyme                                                                                     |
| 443              | B7Z468           | 24                   | 118            | 47.6                  | 754    | 80999  | 5.1 | cDNA FLJ56102, highly similar to sapiens calpastatin (CAST), transcript variant 8, mRNA                               |
| 443              | P20810-5         | 24                   | 118            | 47.5                  | 756    | 81169  | 5.2 | Isoform 5 of Calpastatin                                                                                              |
| 443              | E7EQO6           | 24                   | 118            | 46.7                  | 769    | 82437  | 5.2 | Uncharacterized protein                                                                                               |
| 444              | P17844           | 24                   | 166            | 45.9                  | 614    | 69148  | 8.9 | Probable ATP-dependent RNA helicase DDX5                                                                              |
| 445              | Q92945           | 24                   | 130            | 45.9                  | 711    | 73115  | 7.3 | Far upstream element-binding protein 2                                                                                |
| 446              | P48444           | 24                   | 137            | 49.5                  | 511    | 57210  | 6.2 | Coatomer subunit delta                                                                                                |
| 446              | B0YIW6           | 24                   | 137            | 45.8                  | 552    | 61626  | 5.8 | Archain 1, isoform CRA_a                                                                                              |
| 446              | Q6MZV5           | 24                   | 137            | 45.8                  | 552    | 61598  | 5.8 | Putative uncharacterized protein DKFZp666M09245                                                                       |
| 447              | Q9Y263           | 24                   | 69             | 42.9                  | 795    | 87157  | 6.4 | Phospholipase A-2-activating protein                                                                                  |
| 448              | A8K9D9           | 24                   | 36             | 39.4                  | 899    | 96678  | 6.2 | Nuclear factor of kappa light polypeptide gene enhancer in B-cells 2 (P49/p100), isoform CRA_a                        |
| 448              | Q00653           | 24                   | 36             | 39.3                  | 900    | 96749  | 6.2 | Nuclear factor NF-kappa-B p100 subunit                                                                                |
| 449              | Q15397           | 24                   | 55             | 38                    | 1037   | 119938 | 5.2 | Importin-8                                                                                                            |
| 450              | Q86XP3           | 24                   | 109            | 37.1                  | 938    | 102975 | 7   | ATP-dependent RNA helicase DDX42                                                                                      |
| 451              | Q9H2U1           | 24                   | 63             | 31.5                  | 1008   | 114760 | 7.7 | Probable ATP-dependent RNA helicase DHX36                                                                             |
| 452              | D6W633           | 24                   | 28             | 27.9                  | 1310   | 143431 | 6.2 | Protein tyrosine phosphatase, receptor type, S, isoform CRA_a                                                         |
| 452              | Q13332-6         | 24                   | 28             | 19.1                  | 1910   | 212484 | 6.7 | Isoform 2 of Receptor-type tyrosine-protein phosphatase S                                                             |
| 452              | Q13332-3         | 24                   | 28             | 18.9                  | 1928   | 214656 | 6.5 | Isoform PTPS-MEB of Receptor-type tyrosine-protein phosphatase S                                                      |
| 452              | Q13332-4         | 24                   | 28             | 18.8                  | 1939   | 215928 | 6.6 | Isoform PTPS-MEC of Receptor-type tyrosine-protein phosphatase S                                                      |
| 452              | Q13332-2         | 24                   | 28             | 18.8                  | 1939   | 215978 | 6.5 | Isoform PTPS-MEA of Receptor-type tyrosine-protein phosphatase S                                                      |
| 452              | Q13332           | 24                   | 28             | 18.7                  | 1948   | 217039 | 6.5 | Receptor-type tyrosine-protein phosphatase S                                                                          |
| 453              | Q13439-4         | 24                   | 41             | 13.1                  | 2228   | 260948 | 5.4 | Isoform 4 of Golgin subfamily A member 4                                                                              |
| 453              | Q13439-3         | 24                   | 41             | 13.1                  | 2223   | 260322 | 5.4 | Isoform 3 of Golgin subfamily A member 4                                                                              |
| 453              | Q13439           | 24                   | 41             | 13.1                  | 2230   | 261137 | 5.4 | Golgin subfamily A member 4                                                                                           |
| 453              | E9PH44           | 24                   | 41             | 13                    | 2243   | 262325 | 5.4 | Uncharacterized protein                                                                                               |
| 454              | Q8NFC6           | 24                   | 28             | 11.3                  | 3051   | 330467 | 5.1 | Biorientation of chromosomes in cell division protein 1-like                                                          |
| 455              | Q709C8-4         | 24                   | 28             | 9.9                   | 3584   | 402957 | 6.4 | Isoform 4 of Vacuolar protein sorting-associated protein 13C                                                          |
| 455              | Q709C8-2         | 24                   | 28             | 9.8                   | 3627   | 408072 | 6.6 | Isoform 2 of Vacuolar protein sorting-associated protein 13C                                                          |
| 455              | Q709C8-3         | 24                   | 28             | 9.5                   | 3710   | 417279 | 6.6 | Isoform 3 of Vacuolar protein sorting-associated protein 13C                                                          |
| 455              | Q709C8           | 24                   | 28             | 9.4                   | 3753   | 422393 | 6.8 | Vacuolar protein sorting-associated protein 13C                                                                       |
| 456              | P68363           | 23                   | 1742           | 77.2                  | 451    | 50152  | 5.1 | Tubulin alpha-1B chain Tubulin alpha-1B chain                                                                         |
| 457              | Q13838           | 23                   | 206            | 66.6                  | 428    | 48991  | 5.7 | Spliceosome RNA helicase DDX39B                                                                                       |
| 457              | Q9Z1N5           | 23                   | 206            | 66.6                  | 428    | 49035  | 5.7 | Spliceosome RNA helicase Ddx39b                                                                                       |
| 458              | P06151           | 23                   | 493            | 80.1                  | 332    | 36499  | 7.7 | L-lactate dehydrogenase A chain                                                                                       |
| 459              | Q62WX6           | 23                   | 75             | 74.9                  | 315    | 36108  | 5.1 | Eukaryotic translation initiation factor 2 subunit 1                                                                  |
| 460              | Q3TWE3           | 23                   | 86             | 53.6                  | 509    | 57087  | 4.9 | Putative uncharacterized protein                                                                                      |
| 461              | P14685           | 23                   | 46             | 45.8                  | 530    | 60699  | 8.2 | 26S proteasome non-ATPase regulatory subunit 3                                                                        |
| 461              | Q3TP95           | 23                   | 46             | 45.8                  | 530    | 60718  | 8.4 | Proteasome (Prosome, macropain) 26S subunit, non-ATPase, 3                                                            |
| 462              | Q8VCQ8           | 23                   | 213            | 40.6                  | 530    | 60453  | 7.4 | Caldesmon 1                                                                                                           |
| 462              | E9QOM9           | 23                   | 213            | 40.3                  | 534    | 61652  | 6.9 | Uncharacterized protein                                                                                               |



Table S1. Proteins identified in the OVCAR-3 tumor supernatant by two or more unique peptides.

| Protein or Group | Accession Number | Unique Peptide Count | Spectrum Count | Sequence Coverage (%) | Length | MolWt  | pI   | Descriptive Name                                                                                                                                                                    |
|------------------|------------------|----------------------|----------------|-----------------------|--------|--------|------|-------------------------------------------------------------------------------------------------------------------------------------------------------------------------------------|
| 462              | E9QA16           | 23                   | 213            | 40.1                  | 536    | 61837  | 6.9  | Uncharacterized protein                                                                                                                                                             |
| 463              | Q3THQ5           | 23                   | 105            | 39                    | 543    | 62501  | 6.7  | Putative uncharacterized protein                                                                                                                                                    |
| 463              | Q60864           | 23                   | 105            | 39                    | 543    | 62582  | 6.8  | Stress-induced-phosphoprotein 1                                                                                                                                                     |
| 464              | Q3TVV6           | 23                   | 199            | 37.1                  | 800    | 87946  | 6.2  | Putative uncharacterized protein                                                                                                                                                    |
| 464              | Q8VEK3           | 23                   | 199            | 37.1                  | 800    | 87918  | 6.2  | Heterogeneous nuclear ribonucleoprotein U                                                                                                                                           |
| 464              | Q3ULH5           | 23                   | 199            | 37.1                  | 800    | 87846  | 6.3  | Putative uncharacterized protein                                                                                                                                                    |
| 465              | E9QME9           | 23                   | 91             | 35.5                  | 889    | 99358  | 6    | Uncharacterized protein                                                                                                                                                             |
| 465              | Q61704           | 23                   | 91             | 35.5                  | 889    | 99366  | 6    | Inter-alpha-trypsin inhibitor heavy chain H3                                                                                                                                        |
| 466              | Q61703           | 23                   | 136            | 34.6                  | 946    | 105928 | 7.3  | Inter-alpha-trypsin inhibitor heavy chain H2                                                                                                                                        |
| 467              | Q3TZ32           | 23                   | 82             | 30.8                  | 968    | 106860 | 5.7  | Putative uncharacterized protein                                                                                                                                                    |
| 467              | Q8BGQ7           | 23                   | 82             | 30.8                  | 968    | 106908 | 5.7  | Alanyl-tRNA synthetase, cytoplasmic                                                                                                                                                 |
| 467              | Q3UD67           | 23                   | 82             | 30.8                  | 968    | 106878 | 5.7  | Putative uncharacterized protein                                                                                                                                                    |
| 468              | E9QQ65           | 23                   | 103            | 17.2                  | 1280   | 147031 | 6    | Uncharacterized protein                                                                                                                                                             |
| 468              | E9QQ64           | 23                   | 103            | 16.9                  | 1304   | 149942 | 5.9  | Uncharacterized protein                                                                                                                                                             |
| 468              | UPI0001278276    | 23                   | 103            | 16.6                  | 1327   | 152543 | 5.9  | kinectin                                                                                                                                                                            |
| 469              | P13489           | 23                   | 73             | 81.3                  | 461    | 49974  | 4.8  | Ribonuclease inhibitor                                                                                                                                                              |
| 470              | Q9BOE3           | 23                   | 787            | 77.1                  | 449    | 49895  | 5.1  | Tubulin alpha-1C chain                                                                                                                                                              |
| 471              | Q9Y2T3           | 23                   | 62             | 76.7                  | 454    | 51003  | 5.7  | Guanine deaminase                                                                                                                                                                   |
| 472              | P43686           | 23                   | 98             | 75.8                  | 418    | 47366  | 5.2  | 26S protease regulatory subunit 6B                                                                                                                                                  |
| 473              | P05198           | 23                   | 83             | 74.9                  | 315    | 36112  | 5.1  | Eukaryotic translation initiation factor 2 subunit 1                                                                                                                                |
| 474              | P62136           | 23                   | 101            | 73.9                  | 330    | 37512  | 6.3  | Serine/threonine-protein phosphatase PP1-alpha catalytic subunit                                                                                                                    |
| 475              | P27797           | 23                   | 71             | 72.9                  | 417    | 48142  | 4.4  | Calreticulin                                                                                                                                                                        |
| 476              | P14866           | 23                   | 198            | 71.8                  | 589    | 64133  | 8.2  | Heterogeneous nuclear ribonucleoprotein L                                                                                                                                           |
| 477              | Q9NZU5           | 23                   | 62             | 67.9                  | 365    | 40833  | 7.9  | LIM and cysteine-rich domains protein 1                                                                                                                                             |
| 478              | Q13153           | 23                   | 81             | 59.6                  | 545    | 60647  | 5.8  | Serine/threonine-protein kinase PAK 1                                                                                                                                               |
| 479              | UPI00003D2EAD    | 23                   | 72             | 53.9                  | 666    | 74798  | 5.9  | xaa-Pro aminopeptidase 1 isoform 1                                                                                                                                                  |
| 480              | P27694           | 23                   | 78             | 53.6                  | 616    | 68138  | 7.2  | Replication protein A 70 kDa DNA-binding subunit                                                                                                                                    |
| 481              | Q15046           | 23                   | 91             | 52.4                  | 697    | 68048  | 6.4  | Lysyl-tRNA synthetase                                                                                                                                                               |
| 481              | Q15046-2         | 23                   | 91             | 50.1                  | 525    | 71497  | 6.8  | Isoform Mitochondrial of Lysyl-tRNA synthetase                                                                                                                                      |
| 482              | B2R8Z8           | 23                   | 169            | 47.4                  | 623    | 69602  | 8.8  | cDNA, FLJ94136, highly similar to sapiens synaptotagmin binding, cytoplasmic RNA interacting protein (SYNCRIP), mRNA                                                                |
| 482              | O60506           | 23                   | 169            | 47.4                  | 623    | 69603  | 8.6  | Heterogeneous nuclear ribonucleoprotein Q                                                                                                                                           |
| 483              | Q05682-5         | 23                   | 172            | 43.8                  | 532    | 61213  | 6.7  | Isoform 5 of Caldesmon                                                                                                                                                              |
| 483              | Q05682-4         | 23                   | 172            | 43.3                  | 538    | 62663  | 6.4  | Isoform 4 of Caldesmon                                                                                                                                                              |
| 483              | B7Z6G4           | 23                   | 172            | 42.9                  | 543    | 62742  | 5.9  | cDNA FLJ53193, highly similar to sapiens caldesmon 1 (CALD1), transcript variant 5, mRNA                                                                                            |
| 484              | P23921           | 23                   | 37             | 39.1                  | 792    | 90070  | 7.1  | Ribonucleoside-diphosphate reductase large subunit                                                                                                                                  |
| 485              | P51003           | 23                   | 35             | 39.1                  | 745    | 82843  | 7.4  | Poly(A) polymerase alpha                                                                                                                                                            |
| 485              | UPI00015DFDD9    | 23                   | 35             | 39.1                  | 744    | 82651  | 7.4  | Poly(A) polymerase alpha (EC 2.7.7.19) (PAP) (Polynucleotide adenylyltransferase alpha).                                                                                            |
| 486              | Q8N163           | 23                   | 95             | 39                    | 923    | 102902 | 5.2  | Protein KIAA1967                                                                                                                                                                    |
| 487              | P41250           | 23                   | 63             | 38.6                  | 739    | 83166  | 7    | Glycyl-tRNA synthetase                                                                                                                                                              |
| 488              | Q9NR30           | 23                   | 70             | 35.5                  | 783    | 87344  | 9.3  | Nucleolar RNA helicase 2                                                                                                                                                            |
| 489              | P55285           | 23                   | 167            | 34.6                  | 790    | 88309  | 4.9  | Cadherin-6                                                                                                                                                                          |
| 490              | B3KMC9           | 23                   | 47             | 32.3                  | 950    | 108613 | 7.5  | cDNA FLJ107111 fis, clone NT2RP3000917, highly similar to 5'-3' exoribonuclease 2 (EC 3.1.11.-)                                                                                     |
| 490              | Q9H0D6           | 23                   | 47             | 32.3                  | 950    | 108583 | 7.5  | 5'-3' exoribonuclease 2                                                                                                                                                             |
| 491              | P53992           | 23                   | 119            | 31.2                  | 1094   | 118325 | 7.1  | Protein transport protein Sec24C                                                                                                                                                    |
| 492              | Q24JP5           | 23                   | 61             | 31.2                  | 1023   | 110110 | 5.6  | Transmembrane protein 132A                                                                                                                                                          |
| 492              | Q24JP5-2         | 23                   | 61             | 31.2                  | 1024   | 110197 | 5.6  | Isoform 2 of Transmembrane protein 132A                                                                                                                                             |
| 493              | Q9UHP3           | 23                   | 33             | 27                    | 1055   | 122218 | 5.3  | Ubiquitin carboxyl-terminal hydrolase 25                                                                                                                                            |
| 493              | UPI00015DF741    | 23                   | 33             | 26.2                  | 1086   | 125635 | 5.4  | Ubiquitin carboxyl-terminal hydrolase 25 (EC 3.1.2.15) (Ubiquitin thioesterase 25) (Ubiquitin-specific-processing protease 25) (Deubiquitinating enzyme 25) (USP on chromosome 21). |
| 493              | Q9UHP3-1         | 23                   | 33             | 26.2                  | 1087   | 125750 | 5.4  | Isoform USP25b of Ubiquitin carboxyl-terminal hydrolase 25                                                                                                                          |
| 493              | Q9UHP3-3         | 23                   | 33             | 25.3                  | 1125   | 129963 | 5.4  | Isoform USP25m of Ubiquitin carboxyl-terminal hydrolase 25                                                                                                                          |
| 494              | Q76046           | 23                   | 31             | 24.8                  | 1246   | 137794 | 6.1  | Putative RNA helicase Ski2w                                                                                                                                                         |
| 494              | Q5JP73           | 23                   | 31             | 24.8                  | 1246   | 137737 | 6.1  | Superkiller viralicidal activity 2-like (S. cerevisiae)                                                                                                                             |
| 494              | Q15477           | 23                   | 31             | 24.8                  | 1246   | 137755 | 6.1  | Helicase SKI2W                                                                                                                                                                      |
| 495              | Q9Y2W1           | 23                   | 135            | 24.7                  | 955    | 108666 | 10.2 | Thyroid hormone receptor-associated protein 3                                                                                                                                       |
| 496              | B4DHJ3           | 23                   | 38             | 23.8                  | 1167   | 133027 | 7.2  | DNA-directed RNA polymerase                                                                                                                                                         |
| 496              | C9J2Y9           | 23                   | 38             | 23.8                  | 1167   | 133057 | 7.2  | DNA-directed RNA polymerase                                                                                                                                                         |
| 496              | P30876           | 23                   | 38             | 23.8                  | 1174   | 133896 | 6.9  | DNA-directed RNA polymerase II subunit RPB2                                                                                                                                         |
| 497              | B3KMS0           | 23                   | 59             | 23.4                  | 1401   | 157195 | 6.6  | Condensin complex subunit 1                                                                                                                                                         |
| 497              | Q15021           | 23                   | 59             | 23.4                  | 1401   | 157182 | 6.6  | Condensin complex subunit 1                                                                                                                                                         |
| 498              | O60333-2         | 23                   | 35             | 17.1                  | 1770   | 199261 | 5.5  | Isoform 2 of Kinesin-like protein KIF1B                                                                                                                                             |
| 498              | Q4R9M7           | 23                   | 35             | 17                    | 1783   | 200574 | 5.5  | Kinesin family member 1Bbeta isoform IV                                                                                                                                             |
| 498              | Q4R9M8           | 23                   | 35             | 16.9                  | 1797   | 201950 | 5.5  | Kinesin family member 1Bbeta isoform III                                                                                                                                            |
| 498              | O60333           | 23                   | 35             | 16.7                  | 1816   | 204475 | 5.6  | Kinesin-like protein KIF1B                                                                                                                                                          |
| 498              | Q4R9M9           | 23                   | 35             | 16.7                  | 1809   | 203641 | 5.6  | Kinesin family member 1Bbeta isoform II                                                                                                                                             |
| 498              | Q4VXC4           | 23                   | 35             | 16.6                  | 1823   | 205139 | 5.5  | Kinesin family member 1B                                                                                                                                                            |
| 499              | E9PKG1           | 22                   | 70             | 74.5                  | 325    | 37709  | 6.1  | Uncharacterized protein                                                                                                                                                             |
| 499              | Q8C2D7           | 22                   | 70             | 70.6                  | 343    | 39562  | 5.6  | Putative uncharacterized protein                                                                                                                                                    |
| 499              | Q99873-2         | 22                   | 70             | 69.7                  | 347    | 39929  | 5.6  | Isoform 2 of Protein arginine N-methyltransferase 1                                                                                                                                 |
| 499              | Q80WB1           | 22                   | 70             | 69.1                  | 350    | 40292  | 5.8  | Prmt1 protein (Fragment)                                                                                                                                                            |
| 499              | Q8WUW5           | 22                   | 70             | 68.8                  | 352    | 40417  | 5.5  | PRMT1 protein (Fragment)                                                                                                                                                            |
| 499              | Q63009           | 22                   | 70             | 68.6                  | 353    | 40522  | 5.6  | Protein arginine N-methyltransferase 1                                                                                                                                              |
| 499              | Q80WV6           | 22                   | 70             | 68.4                  | 354    | 40759  | 5.7  | Prmt1 protein                                                                                                                                                                       |
| 499              | Q99873           | 22                   | 70             | 67                    | 361    | 41516  | 5.4  | Protein arginine N-methyltransferase 1                                                                                                                                              |
| 499              | Q9JIF0           | 22                   | 70             | 65.2                  | 371    | 42436  | 5.4  | Protein arginine N-methyltransferase 1                                                                                                                                              |
| 500              | UPI0000D62797    | 22                   | 676            | 64.2                  | 352    | 37270  | 9.1  | heterogeneous nuclear ribonucleoprotein A2/B1                                                                                                                                       |
| 500              | O88569           | 22                   | 676            | 64                    | 353    | 37403  | 8.9  | Heterogeneous nuclear ribonucleoproteins A2/B1                                                                                                                                      |
| 500              | P22626           | 22                   | 676            | 64                    | 353    | 37430  | 8.9  | Heterogeneous nuclear ribonucleoproteins A2/B1                                                                                                                                      |
| 501              | P62191           | 22                   | 94             | 62.3                  | 440    | 49185  | 6.2  | 26S protease regulatory subunit 4                                                                                                                                                   |
| 501              | Q53HB3           | 22                   | 94             | 62.3                  | 440    | 49213  | 6.2  | Proteasome 26S ATPase subunit 1 variant (Fragment)                                                                                                                                  |
| 502              | P35998           | 22                   | 51             | 59.1                  | 433    | 48634  | 5.9  | 26S protease regulatory subunit 7                                                                                                                                                   |
| 502              | P46471           | 22                   | 51             | 59.1                  | 433    | 48648  | 5.9  | 26S protease regulatory subunit 7                                                                                                                                                   |
| 503              | Q5T6W5           | 22                   | 1092           | 54.7                  | 428    | 47557  | 5.6  | Heterogeneous nuclear ribonucleoprotein K                                                                                                                                           |
| 503              | P61979-3         | 22                   | 1092           | 53.3                  | 439    | 48511  | 5.9  | Isoform 3 of Heterogeneous nuclear ribonucleoprotein K Isoform 3 of Heterogeneous nuclear ribonucleoprotein K                                                                       |
| 503              | B2M1R6           | 22                   | 1092           | 53.2                  | 440    | 48562  | 5.5  | Heterogeneous nuclear ribonucleoprotein K                                                                                                                                           |
| 503              | E9Q8D6           | 22                   | 1092           | 52                    | 450    | 49879  | 5.9  | Uncharacterized protein                                                                                                                                                             |
| 503              | E9PVM4           | 22                   | 1092           | 51.1                  | 458    | 50855  | 6.4  | Uncharacterized protein                                                                                                                                                             |
| 504              | O35286           | 22                   | 71             | 40.5                  | 795    | 91007  | 7.5  | Putative pre-mRNA-splicing factor ATP-dependent RNA helicase DHX15                                                                                                                  |
| 504              | Q3TFE5           | 22                   | 71             | 40.5                  | 795    | 91023  | 7.4  | Putative uncharacterized protein                                                                                                                                                    |
| 504              | O43143           | 22                   | 71             | 40.5                  | 795    | 90933  | 7.5  | Putative pre-mRNA-splicing factor ATP-dependent RNA helicase DHX15                                                                                                                  |
| 505              | Q13616           | 22                   | 38             | 39                    | 776    | 89678  | 8    | Cullin-1                                                                                                                                                                            |
| 505              | Q9WTX6           | 22                   | 38             | 39                    | 776    | 89691  | 8    | Cullin-1                                                                                                                                                                            |

Table S1. Proteins identified in the OVCAR-3 tumor supernatant by two or more unique peptides.

| Protein or Protein Group | Accession Number | Unique Peptide Count | Spectrum Count | Sequence Coverage (%) | Length | MolWt  | pI  | Descriptive Name                                                                                                                                                                             |
|--------------------------|------------------|----------------------|----------------|-----------------------|--------|--------|-----|----------------------------------------------------------------------------------------------------------------------------------------------------------------------------------------------|
| 505                      | Q3UIA5           | 22                   | 38             | 39                    | 776    | 89677  | 8   | Putative uncharacterized protein                                                                                                                                                             |
| 506                      | Q3UBP6           | 22                   | 1069           | 79.7                  | 375    | 41769  | 5.5 | Putative uncharacterized protein                                                                                                                                                             |
| 507                      | P68373           | 22                   | 824            | 72.8                  | 449    | 49909  | 5.1 | Tubulin alpha-1C chain                                                                                                                                                                       |
| 508                      | P10126           | 22                   | 859            | 64.3                  | 462    | 50114  | 9   | Elongation factor 1-alpha 1                                                                                                                                                                  |
| 508                      | Q3UA81           | 22                   | 859            | 64.3                  | 462    | 50113  | 9.1 | Elongation factor 1-alpha                                                                                                                                                                    |
| 509                      | P07356           | 22                   | 153            | 63.7                  | 339    | 38676  | 7.7 | Annexin A2                                                                                                                                                                                   |
| 510                      | P40124           | 22                   | 70             | 63.3                  | 474    | 51575  | 7.5 | Adenylyl cyclase-associated protein 1                                                                                                                                                        |
| 510                      | Q8BPT7           | 22                   | 70             | 63.3                  | 474    | 51565  | 7.5 | Adenylyl cyclase-associated protein                                                                                                                                                          |
| 511                      | P50247           | 22                   | 71             | 60.4                  | 432    | 47688  | 6.5 | Adenosylhomocysteinase                                                                                                                                                                       |
| 512                      | P07759           | 22                   | 385            | 59.8                  | 418    | 46880  | 5.2 | Serine protease inhibitor A3K                                                                                                                                                                |
| 513                      | Q3U6X6           | 22                   | 58             | 54.4                  | 562    | 61369  | 6.4 | Putative uncharacterized protein                                                                                                                                                             |
| 513                      | Q5RJV4           | 22                   | 58             | 54.4                  | 562    | 61384  | 6.6 | Phosphoglucomutase 2                                                                                                                                                                         |
| 513                      | Q66JR7           | 22                   | 58             | 51.9                  | 590    | 64158  | 6.8 | Pgm2 protein (Fragment)                                                                                                                                                                      |
| 514                      | P23953           | 22                   | 151            | 52.5                  | 554    | 61172  | 5.2 | Liver carboxylesterase N                                                                                                                                                                     |
| 515                      | O89020           | 22                   | 64             | 48.4                  | 608    | 69379  | 5.8 | Afamin                                                                                                                                                                                       |
| 515                      | O89020-3         | 22                   | 64             | 48.1                  | 611    | 69666  | 5.6 | Isoform 3 of Afamin                                                                                                                                                                          |
| 515                      | E9Q826           | 22                   | 64             | 46.4                  | 634    | 72245  | 5.6 | Uncharacterized protein                                                                                                                                                                      |
| 516                      | Q62009-5         | 22                   | 126            | 45                    | 783    | 87098  | 7.7 | Isoform 5 of Periostin                                                                                                                                                                       |
| 516                      | Q62009-3         | 22                   | 126            | 43.5                  | 810    | 89987  | 7.9 | Isoform 3 of Periostin                                                                                                                                                                       |
| 516                      | Q62009-2         | 22                   | 126            | 43.4                  | 811    | 90255  | 7.3 | Isoform 2 of Periostin                                                                                                                                                                       |
| 516                      | Q62009           | 22                   | 126            | 42                    | 838    | 93144  | 7.5 | Periostin                                                                                                                                                                                    |
| 517                      | P08003           | 22                   | 65             | 37                    | 638    | 71982  | 5.3 | Protein disulfide-isomerase A4                                                                                                                                                               |
| 518                      | Q3TCS0           | 22                   | 58             | 35.9                  | 710    | 80682  | 5.7 | Putative uncharacterized protein                                                                                                                                                             |
| 518                      | Q9QUR6           | 22                   | 58             | 35.9                  | 710    | 80752  | 5.7 | Prolyl endopeptidase                                                                                                                                                                         |
| 519                      | E9PV24           | 22                   | 118            | 34.5                  | 789    | 87429  | 6.1 | Uncharacterized protein                                                                                                                                                                      |
| 520                      | Q3B7Z2           | 22                   | 54             | 29.6                  | 751    | 84689  | 7.2 | Oxysterol-binding protein 1                                                                                                                                                                  |
| 520                      | E9QPD4           | 22                   | 54             | 27.6                  | 805    | 88797  | 7.2 | Uncharacterized protein                                                                                                                                                                      |
| 521                      | A6PWC3           | 22                   | 43             | 25.2                  | 1117   | 127773 | 4.9 | Nardilysin, N-arginine dibasic convertase, NRD convertase 1                                                                                                                                  |
| 521                      | Q8R320           | 22                   | 43             | 24.2                  | 1161   | 132877 | 4.9 | Nardilysin, N-arginine dibasic convertase, NRD convertase 1                                                                                                                                  |
| 521                      | Q8BHG1           | 22                   | 43             | 24.2                  | 1161   | 132891 | 4.9 | Nardilysin                                                                                                                                                                                   |
| 521                      | A2A9Q2           | 22                   | 43             | 22.9                  | 1229   | 140620 | 4.9 | Nardilysin, N-arginine dibasic convertase, NRD convertase 1                                                                                                                                  |
| 522                      | O70481           | 22                   | 28             | 17.5                  | 1757   | 200215 | 6   | E3 ubiquitin-protein ligase UBR1                                                                                                                                                             |
| 522                      | Q2M411           | 22                   | 28             | 17.5                  | 1757   | 200203 | 6   | Ubiquitin protein ligase E3 component n-recogin 1                                                                                                                                            |
| 523                      | P08758           | 22                   | 69             | 72.8                  | 320    | 35937  | 5   | Annexin A5                                                                                                                                                                                   |
| 524                      | B5BUB1           | 22                   | 50             | 70.2                  | 456    | 50216  | 6.4 | RuvB-like 1 (Fragment)                                                                                                                                                                       |
| 524                      | Q9Y265           | 22                   | 50             | 70.2                  | 456    | 50228  | 6.4 | RuvB-like 1                                                                                                                                                                                  |
| 525                      | P07910           | 22                   | 382            | 67.3                  | 306    | 33670  | 5.1 | Heterogeneous nuclear ribonucleoproteins C1/C2<br>cDNA FLJ38173 fis, clone FCBBF1000053, highly similar to<br>HYDROXYMETHYLGLUTARYL-COA SYNTHASE,<br>CYTOPLASMIC                             |
| 526                      | Q8N995           | 22                   | 53             | 68.8                  | 509    | 56238  | 5.4 |                                                                                                                                                                                              |
| 526                      | Q01581           | 22                   | 53             | 67.3                  | 520    | 57294  | 5.4 | Hydroxymethylglutaryl-CoA synthase, cytoplasmic                                                                                                                                              |
| 527                      | P17980           | 22                   | 63             | 66.5                  | 439    | 49204  | 5.2 | 26S protease regulatory subunit 6A                                                                                                                                                           |
| 528                      | Q15008           | 22                   | 51             | 63.5                  | 389    | 45531  | 5.6 | 26S proteasome non-ATPase regulatory subunit 6                                                                                                                                               |
| 529                      | Q8NC51-3         | 22                   | 293            | 61.8                  | 393    | 43135  | 8.4 | Isoform 3 of Plasminogen activator inhibitor 1 RNA-binding protein                                                                                                                           |
| 530                      | Q3Q212           | 22                   | 470            | 59.2                  | 292    | 32642  | 8.5 | Nucleoside diphosphate kinase                                                                                                                                                                |
| 531                      | Q9HAM9           | 22                   | 48             | 58.4                  | 534    | 60627  | 6.8 | EH domain-containing protein 1                                                                                                                                                               |
| 532                      | Q9BY44           | 22                   | 89             | 53.8                  | 585    | 64990  | 8.9 | Eukaryotic translation initiation factor 2A                                                                                                                                                  |
| 533                      | P20700           | 22                   | 92             | 50.9                  | 586    | 66408  | 5.2 | Lamin-B1                                                                                                                                                                                     |
| 534                      | O60502           | 22                   | 29             | 41.5                  | 916    | 102915 | 4.9 | Bifunctional protein NCOAT                                                                                                                                                                   |
| 535                      | Q9Y5L0-3         | 22                   | 71             | 41                    | 909    | 102541 | 5.6 | Isoform 3 of Transportin-3                                                                                                                                                                   |
| 535                      | Q9Y5L0           | 22                   | 71             | 40.4                  | 923    | 104203 | 5.6 | Transportin-3                                                                                                                                                                                |
| 536                      | Q8NE71           | 22                   | 51             | 40.1                  | 845    | 95926  | 6.8 | ATP-binding cassette sub-family F member 1                                                                                                                                                   |
| 537                      | Q13618-2         | 22                   | 36             | 36                    | 744    | 86234  | 8   | Isoform 2 of Cullin-3                                                                                                                                                                        |
| 537                      | Q13618           | 22                   | 36             | 34.9                  | 768    | 88930  | 8.5 | Cullin-3                                                                                                                                                                                     |
| 538                      | Q15459           | 22                   | 69             | 34                    | 793    | 88886  | 5.2 | Splicing factor 3A subunit 1                                                                                                                                                                 |
| 539                      | B7ZKS3           | 22                   | 25             | 29.3                  | 1035   | 119018 | 6   | Ubiquitin specific peptidase 48                                                                                                                                                              |
| 539                      | Q86UV5           | 22                   | 25             | 29.3                  | 1035   | 119032 | 6.1 | Ubiquitin carboxyl-terminal hydrolase 48                                                                                                                                                     |
| 539                      | B7ZKS7           | 22                   | 25             | 28.9                  | 1047   | 120526 | 6.1 | USP48 protein                                                                                                                                                                                |
| 540                      | Q12768           | 22                   | 30             | 26.6                  | 1159   | 134286 | 7   | WASH complex subunit strumpellin                                                                                                                                                             |
| 541                      | Q5VTR2           | 22                   | 24             | 26.5                  | 975    | 113662 | 5.9 | E3 ubiquitin-protein ligase BRE1A                                                                                                                                                            |
| 542                      | A6N6J7           | 22                   | 34             | 23.8                  | 1440   | 162728 | 5.7 | JARID1C protein                                                                                                                                                                              |
| 542                      | P41229           | 22                   | 34             | 22                    | 1560   | 175719 | 5.6 | Lysine-specific demethylase 5C                                                                                                                                                               |
| 542                      | B0QZ44           | 22                   | 34             | 22                    | 1559   | 175591 | 5.6 | Jumonji, AT rich interactive domain 1C                                                                                                                                                       |
| 543                      | D9ZGF8           | 22                   | 28             | 23.8                  | 1354   | 158243 | 5.9 | Rho-associated, coiled-coil containing protein kinase 1                                                                                                                                      |
| 543                      | Q13464           | 22                   | 28             | 23.8                  | 1354   | 158174 | 5.9 | Rho-associated protein kinase 1                                                                                                                                                              |
| 544                      | Q9H3S7           | 22                   | 48             | 18.7                  | 1636   | 178972 | 6.9 | Tyrosine-protein phosphatase non-receptor type 23                                                                                                                                            |
| 545                      | Q8IWW8-4         | 22                   | 28             | 18.2                  | 1755   | 200539 | 6.2 | Isoform 4 of E3 ubiquitin-protein ligase UBR2                                                                                                                                                |
| 546                      | Q7Z3U7-2         | 22                   | 42             | 17.7                  | 1676   | 185982 | 6.2 | Isoform 2 of Protein MON2 log                                                                                                                                                                |
| 546                      | B7ZM73           | 22                   | 42             | 17.6                  | 1688   | 187318 | 6   | MON2 protein                                                                                                                                                                                 |
| 546                      | B9EGP5           | 22                   | 42             | 17.4                  | 1711   | 189688 | 6.1 | MON2 protein                                                                                                                                                                                 |
| 546                      | Q7Z3U7-4         | 22                   | 42             | 17.3                  | 1717   | 190357 | 6.1 | Isoform 4 of Protein MON2 log                                                                                                                                                                |
| 546                      | Q7Z3U7           | 22                   | 42             | 17.3                  | 1718   | 190486 | 6.1 | Protein MON2 log                                                                                                                                                                             |
| 547                      | P62140           | 21                   | 191            | 69.7                  | 327    | 37187  | 6.2 | Serine/threonine-protein phosphatase PP1-beta catalytic subunit<br>Serine/threonine-protein phosphatase PP1-beta catalytic subunit<br>ATP-binding cassette sub-family E member 1 ATP-binding |
| 548                      | P61221           | 21                   | 95             | 44.9                  | 599    | 67314  | 8.3 | cassette sub-family E member 1                                                                                                                                                               |
| 548                      | Q3TJM9           | 21                   | 95             | 44.9                  | 599    | 67280  | 8.3 | Putative uncharacterized protein                                                                                                                                                             |
| 548                      | Q3TIU8           | 21                   | 95             | 44.9                  | 599    | 67215  | 8.3 | Putative uncharacterized protein<br>cDNA FLJ75083, highly similar to sapiens amine oxidase (flavin<br>containing) domain 2 (AOF2),mRNA                                                       |
| 549                      | A8K2R3           | 21                   | 52             | 41.5                  | 730    | 81170  | 6.2 |                                                                                                                                                                                              |
| 549                      | O60341           | 21                   | 52             | 35.6                  | 852    | 92903  | 6.5 | Lysine-specific histone demethylase 1A                                                                                                                                                       |
| 549                      | Q6ZQ88           | 21                   | 52             | 35.5                  | 853    | 92851  | 6.5 | Lysine-specific histone demethylase 1A                                                                                                                                                       |
| 549                      | A3KG93           | 21                   | 52             | 34.7                  | 873    | 94659  | 6.2 | Amine oxidase (Flavin containing) domain 2                                                                                                                                                   |
| 549                      | O60341-2         | 21                   | 52             | 34.6                  | 876    | 95155  | 6.2 | Isoform 2 of Lysine-specific histone demethylase 1A                                                                                                                                          |
| 550                      | P17751           | 21                   | 259            | 76.7                  | 249    | 26713  | 7.3 | Triosephosphate isomerase                                                                                                                                                                    |
| 551                      | P40142           | 21                   | 88             | 52.3                  | 623    | 67631  | 7.5 | Transketolase                                                                                                                                                                                |
| 552                      | Q8C2E1           | 21                   | 95             | 51.8                  | 589    | 65323  | 5.1 | Putative uncharacterized protein                                                                                                                                                             |
| 553                      | O88342           | 21                   | 47             | 49.3                  | 606    | 66407  | 6.6 | WD repeat-containing protein 1                                                                                                                                                               |
| 553                      | Q80Z19           | 21                   | 47             | 45.4                  | 658    | 72113  | 8.4 | WD repeat domain 1 (Fragment)                                                                                                                                                                |
| 554                      | Q62318           | 21                   | 174            | 29.9                  | 834    | 88847  | 5.8 | Transcription intermediary factor 1-beta                                                                                                                                                     |
| 555                      | Q640N1           | 21                   | 78             | 25.3                  | 1128   | 128365 | 5.1 | Adipocyte enhancer-binding protein 1                                                                                                                                                         |
| 556                      | B1ATS3           | 21                   | 29             | 21.7                  | 1169   | 128652 | 5.9 | Ankyrin repeat and FYVE domain containing 1                                                                                                                                                  |
| 556                      | Q810B6           | 21                   | 29             | 21.7                  | 1169   | 128604 | 5.9 | Ankyrin repeat and FYVE domain-containing protein 1                                                                                                                                          |
| 556                      | B7ZP20           | 21                   | 29             | 21.7                  | 1169   | 128636 | 5.9 | Ankyrin repeat and FYVE domain containing 1                                                                                                                                                  |
| 557                      | O00151           | 21                   | 239            | 79.3                  | 329    | 36072  | 7   | PDZ and LIM domain protein 1                                                                                                                                                                 |
| 558                      | P18669           | 21                   | 282            | 79.1                  | 254    | 28804  | 7.2 | Phosphoglycerate mutase 1                                                                                                                                                                    |
| 558                      | UPI00001AF8FE    | 21                   | 282            | 79.1                  | 254    | 28850  | 7.2 | UPI00001AF8FE UniRef100 entry                                                                                                                                                                |
| 558                      | Q53G35           | 21                   | 282            | 79.1                  | 254    | 28832  | 7.2 | Phosphoglycerate mutase (Fragment)                                                                                                                                                           |
| 559                      | P28482           | 21                   | 67             | 75.6                  | 360    | 41390  | 7   | Mitogen-activated protein kinase 1                                                                                                                                                           |
| 560                      | P04083           | 21                   | 123            | 66.5                  | 346    | 38714  | 7   | Annexin A1                                                                                                                                                                                   |
| 561                      | P52209           | 21                   | 108            | 65.4                  | 483    | 53140  | 7.2 | 6-phosphogluconate dehydrogenase, decarboxylating                                                                                                                                            |
| 562                      | Q9UQ80           | 21                   | 64             | 65                    | 394    | 43787  | 6.6 | Proliferation-associated protein 2G4                                                                                                                                                         |
| 563                      | B7Z9L0           | 21                   | 40             | 62.9                  | 483    | 52331  | 6.6 | T-complex protein 1 subunit delta                                                                                                                                                            |

Table S1. Proteins identified in the OVCAR-3 tumor supernatant by two or more unique peptides.

| Protein or Protein Group | Accession Number | Unique Peptide Count | Spectrum Count | Sequence Coverage (%) | Length | MolWt  | pI  | Descriptive Name                                                                                                                                                 |
|--------------------------|------------------|----------------------|----------------|-----------------------|--------|--------|-----|------------------------------------------------------------------------------------------------------------------------------------------------------------------|
| 563                      | P50991           | 21                   | 40             | 56.4                  | 539    | 57924  | 7.8 | T-complex protein 1 subunit delta                                                                                                                                |
| 564                      | P50454           | 21                   | 180            | 62.2                  | 418    | 46441  | 8.7 | Serpin H1                                                                                                                                                        |
| 565                      | Q9Y617           | 21                   | 64             | 68.9                  | 370    | 40423  | 7.7 | Phosphoserine aminotransferase                                                                                                                                   |
| 565                      | B4DHQ3           | 21                   | 64             | 61.4                  | 415    | 45355  | 9   | Phosphoserine aminotransferase                                                                                                                                   |
| 565                      | UPI0001AE6DE5    | 21                   | 64             | 61.4                  | 415    | 45256  | 8.9 | UPI0001AE6DE5 UniRef100 entry                                                                                                                                    |
| 566                      | P34896           | 21                   | 49             | 57.8                  | 483    | 53083  | 7.7 | Serine hydroxymethyltransferase, cytosolic                                                                                                                       |
| 567                      | P48637           | 21                   | 36             | 56.3                  | 474    | 52385  | 5.9 | Glutathione synthetase                                                                                                                                           |
| 568                      | P49591           | 21                   | 49             | 55.8                  | 514    | 58777  | 6.4 | Seryl-tRNA synthetase, cytoplasmic                                                                                                                               |
| 568                      | Q5T5C7           | 21                   | 49             | 53.5                  | 536    | 61313  | 7.1 | Seryl-tRNA synthetase                                                                                                                                            |
| 569                      | P35241           | 21                   | 87             | 53.5                  | 583    | 68564  | 6.4 | Radixin                                                                                                                                                          |
| 570                      | O43175           | 21                   | 117            | 52                    | 533    | 56651  | 6.7 | D-3-phosphoglycerate dehydrogenase                                                                                                                               |
| 571                      | Q9UHX1-2         | 21                   | 133            | 50.4                  | 542    | 58172  | 5.3 | Isoform 2 of Poly(U)-binding-splicing factor PUF60                                                                                                               |
| 571                      | Q9UHX1           | 21                   | 133            | 48.8                  | 559    | 59876  | 5.3 | Poly(U)-binding-splicing factor PUF60                                                                                                                            |
| 572                      | P54577           | 21                   | 43             | 46.6                  | 528    | 59144  | 7   | Tyrosyl-tRNA synthetase, cytoplasmic                                                                                                                             |
| 573                      | Q08380           | 21                   | 249            | 45                    | 585    | 65331  | 5.3 | Galectin-3-binding protein                                                                                                                                       |
| 574                      | Q95782-2         | 21                   | 57             | 43.9                  | 955    | 105361 | 7.7 | Isoform B of AP-2 complex subunit alpha-1                                                                                                                        |
| 574                      | Q95782           | 21                   | 57             | 42.9                  | 977    | 107546 | 7   | AP-2 complex subunit alpha-1                                                                                                                                     |
| 575                      | Q9Y5K6           | 21                   | 78             | 40.5                  | 639    | 71451  | 6.4 | CD2-associated protein                                                                                                                                           |
| 576                      | Q8TDB6           | 21                   | 66             | 37.3                  | 740    | 83554  | 8.1 | E3 ubiquitin-protein ligase DTX3L                                                                                                                                |
| 577                      | P19367-4         | 21                   | 54             | 36.7                  | 905    | 101104 | 7   | Isoform 4 of Hexokinase-1                                                                                                                                        |
| 577                      | E9PCK0           | 21                   | 54             | 36.7                  | 905    | 101085 | 6.9 | Uncharacterized protein<br>cDNA FLJ78173, highly similar to sapiens hexokinase 1 (HK1) mRNA                                                                      |
| 577                      | A8K7J7           | 21                   | 54             | 36.2                  | 917    | 102387 | 6.7 | Isoform 2 of Hexokinase-1                                                                                                                                        |
| 577                      | P19367-2         | 21                   | 54             | 36.2                  | 916    | 102201 | 6.6 | Isoform 2 of Hexokinase-1                                                                                                                                        |
| 577                      | P19367           | 21                   | 54             | 36.2                  | 917    | 102486 | 6.8 | Hexokinase-1                                                                                                                                                     |
| 577                      | P19367-3         | 21                   | 54             | 36                    | 921    | 102738 | 6.8 | Isoform 3 of Hexokinase-1                                                                                                                                        |
| 577                      | E7ENR4           | 21                   | 54             | 34.9                  | 952    | 106313 | 7.1 | Uncharacterized protein<br>cDNA FLJ46359 fis, clone TEST14049786, highly similar to Hexokinase-1 (EC 2.7.1.1)                                                    |
| 577                      | B3KXY9           | 21                   | 54             | 34.9                  | 952    | 106251 | 7.2 | cDNA FLJ58682, highly similar to Vesicle-fusing ATPase (EC 3.6.4.6)                                                                                              |
| 578                      | B7Z5J7           | 21                   | 52             | 35.2                  | 739    | 82058  | 6.8 | Vesicle-fusing ATPase                                                                                                                                            |
| 578                      | P46459           | 21                   | 52             | 34.9                  | 744    | 82594  | 7   | Heterogeneous nuclear ribonucleoprotein U-like protein 2                                                                                                         |
| 579                      | Q1KMD3           | 21                   | 69             | 33.6                  | 747    | 85105  | 4.9 | Cold shock domain-containing protein E1                                                                                                                          |
| 580                      | O75534           | 21                   | 39             | 33.1                  | 798    | 88885  | 6.2 | Importin-11                                                                                                                                                      |
| 581                      | Q9UI26           | 21                   | 72             | 31                    | 975    | 112535 | 5.3 | Nucleolin                                                                                                                                                        |
| 582                      | P19338           | 21                   | 246            | 29.3                  | 710    | 76615  | 4.7 | Eukaryotic translation initiation factor 4 gamma 2 (eIF-4-gamma 2) (eIF-4G 2) (eIF4G 2) (p97) (Death-associated protein 5) (DAP-5).                              |
| 583                      | UPI00015DFF58    | 21                   | 85             | 29.9                  | 869    | 98118  | 7   | Isoform 2 of Eukaryotic translation initiation factor 4 gamma 2                                                                                                  |
| 583                      | P78344-2         | 21                   | 85             | 29.9                  | 869    | 98150  | 7   | Eukaryotic translation initiation factor 4 gamma 2                                                                                                               |
| 583                      | P78344           | 21                   | 85             | 28.7                  | 907    | 102362 | 7.1 | Eukaryotic translation initiation factor 4 gamma, 2 variant (Fragment)                                                                                           |
| 583                      | Q59G42           | 21                   | 85             | 27.7                  | 940    | 105828 | 7.4 | cDNA FLJ59571, highly similar to Eukaryotic translation initiation factor 4gamma 2                                                                               |
| 583                      | B4DZF2           | 21                   | 85             | 26.5                  | 980    | 110260 | 8   | Isoform 3 of Ubiquitin carboxyl-terminal hydrolase 15                                                                                                            |
| 584                      | Q9Y4E8-3         | 21                   | 30             | 25.3                  | 956    | 109796 | 5.2 | Probable ATP-dependent RNA helicase DDX60                                                                                                                        |
| 585                      | Q8IY21           | 21                   | 30             | 17.9                  | 1712   | 197852 | 7.6 | Interleukin enhancer-binding factor 2 Interleukin enhancer-binding factor 2                                                                                      |
| 586                      | Q12905           | 20                   | 65             | 79.5                  | 390    | 43062  | 5.3 | Putative uncharacterized protein                                                                                                                                 |
| 586                      | Q3UXI9           | 20                   | 65             | 79.5                  | 390    | 43010  | 5.1 | Proteasome (Prosome, macropain) 26S subunit, ATPase, 5, isoform CRA_b                                                                                            |
| 587                      | A8K3Z3           | 20                   | 53             | 62.8                  | 398    | 44784  | 8.2 | 26S protease regulatory subunit 8 (Proteasome 26S subunit ATPase 5) (Proteasome subunit p45) (p45/SUG) (Thyroid hormone receptor-interacting protein 1) (TRIP1). |
| 587                      | UPI0000D62378    | 20                   | 53             | 62.2                  | 402    | 45292  | 8.2 | 26S protease regulatory subunit 8 26S protease regulatory subunit 8                                                                                              |
| 587                      | P62195           | 20                   | 53             | 61.6                  | 406    | 45626  | 7.5 | Septin 7                                                                                                                                                         |
| 588                      | Q8TC62           | 20                   | 47             | 59                    | 417    | 48659  | 8.6 | Putative uncharacterized protein                                                                                                                                 |
| 588                      | Q8C2A3           | 20                   | 47             | 58.9                  | 418    | 48755  | 8.6 | Putative uncharacterized protein                                                                                                                                 |
| 588                      | Q3JNN1           | 20                   | 47             | 58.9                  | 418    | 48677  | 8.6 | Predicted protein product of Nbla02942                                                                                                                           |
| 588                      | Q3LIE9           | 20                   | 47             | 58.9                  | 418    | 48774  | 8.6 | Uncharacterized protein                                                                                                                                          |
| 588                      | E9Q1G8           | 20                   | 47             | 58.9                  | 418    | 48798  | 8.7 | cDNA FLJ75185                                                                                                                                                    |
| 588                      | A8K3D0           | 20                   | 47             | 56.4                  | 436    | 50509  | 8.7 | Septin-7                                                                                                                                                         |
| 588                      | O55131           | 20                   | 47             | 56.4                  | 436    | 50550  | 8.6 | Uncharacterized protein                                                                                                                                          |
| 588                      | E7EPK1           | 20                   | 47             | 56.4                  | 436    | 50567  | 8.6 | Septin-7                                                                                                                                                         |
| 588                      | Q16181           | 20                   | 47             | 56.3                  | 437    | 50680  | 8.6 | Uncharacterized protein                                                                                                                                          |
| 588                      | E9Q9F5           | 20                   | 47             | 56.3                  | 437    | 50649  | 8.6 | Septin-7 (CDC10 protein log).                                                                                                                                    |
| 588                      | UPI0000D61C26    | 20                   | 47             | 56.2                  | 438    | 50809  | 8.5 | Vitamin D-binding protein                                                                                                                                        |
| 589                      | P21614           | 20                   | 89             | 68.9                  | 476    | 53600  | 5.5 | Calreticulin                                                                                                                                                     |
| 590                      | P14211           | 20                   | 65             | 65.9                  | 416    | 47995  | 4.5 | Annexin A5                                                                                                                                                       |
| 591                      | P48036           | 20                   | 55             | 64.9                  | 319    | 35752  | 5   | V-type proton ATPase catalytic subunit A                                                                                                                         |
| 592                      | P50516           | 20                   | 73             | 43.6                  | 617    | 68326  | 5.6 | AP-1 complex subunit gamma-1                                                                                                                                     |
| 593                      | P22892           | 20                   | 96             | 33.7                  | 822    | 91350  | 6.8 | Adaptor protein complex AP-1, gamma 1 subunit                                                                                                                    |
| 593                      | Q8CBB7           | 20                   | 96             | 33.6                  | 825    | 91722  | 6.8 | Putative uncharacterized protein                                                                                                                                 |
| 593                      | Q3JUKX8          | 20                   | 96             | 33.6                  | 825    | 91695  | 6.8 | Uncharacterized protein                                                                                                                                          |
| 594                      | D3Z4Y4           | 20                   | 329            | 28.6                  | 563    | 60362  | 7.8 | Neutral alpha-glucosidase AB                                                                                                                                     |
| 595                      | Q8BHN3           | 20                   | 81             | 28.6                  | 944    | 106911 | 6.1 | Alpha glucosidase 2 alpha neutral subunit                                                                                                                        |
| 595                      | A1A4T2           | 20                   | 81             | 28                    | 966    | 109404 | 6.2 | Ubiquitin carboxyl-terminal hydrolase                                                                                                                            |
| 596                      | Q32NY0           | 20                   | 24             | 17.4                  | 1376   | 157344 | 5.1 | Pyridoxal kinase                                                                                                                                                 |
| 597                      | O00764           | 20                   | 65             | 82.7                  | 312    | 35102  | 6.1 | Proteasome subunit alpha type-1                                                                                                                                  |
| 598                      | P25786           | 20                   | 84             | 81.7                  | 263    | 29556  | 6.6 | Isoform Long of Proteasome subunit alpha type-1                                                                                                                  |
| 598                      | P25786-2         | 20                   | 84             | 79.9                  | 269    | 30239  | 7   | 3'(2),5'-bisphosphate nucleotidase 1                                                                                                                             |
| 599                      | Q95861           | 20                   | 56             | 79.9                  | 308    | 33392  | 5.7 | cDNA, FLJ96580, highly similar to sapiens hepatoma-derived growth factor (high-mobility group protein 1-like) (HDGF), mRNA                                       |
| 600                      | B2RDE8           | 20                   | 148            | 77.5                  | 240    | 26805  | 4.7 | Protein phosphatase 1 regulatory subunit 7                                                                                                                       |
| 601                      | Q15435           | 20                   | 47             | 75.8                  | 360    | 41564  | 4.9 | Inorganic pyrophosphatase                                                                                                                                        |
| 602                      | Q15181           | 20                   | 397            | 74.7                  | 289    | 32660  | 5.9 | DNA-(apurinic or apyrimidinic site) lyase                                                                                                                        |
| 603                      | P27695           | 20                   | 119            | 72.6                  | 318    | 35554  | 8.1 | Actin-related protein 3                                                                                                                                          |
| 604                      | P61158           | 20                   | 81             | 72                    | 418    | 47371  | 5.9 | Twinfilin-2                                                                                                                                                      |
| 605                      | Q6IBS0           | 20                   | 127            | 69.1                  | 349    | 39548  | 6.9 | Multifunctional protein ADE2                                                                                                                                     |
| 606                      | P22234           | 20                   | 79             | 68.7                  | 425    | 47079  | 7.2 | Argininosuccinate synthase                                                                                                                                       |
| 607                      | A8KAP9           | 20                   | 232            | 68.4                  | 412    | 46554  | 8   | Argininosuccinate synthase                                                                                                                                       |
| 607                      | P00966           | 20                   | 232            | 68.4                  | 412    | 46530  | 8   | Proteasome activator complex subunit 1                                                                                                                           |
| 608                      | Q06323           | 20                   | 169            | 68.3                  | 249    | 28723  | 6   | COP9 signalosome complex subunit 4                                                                                                                               |
| 609                      | Q9BT78           | 20                   | 51             | 68.2                  | 406    | 46269  | 5.8 | L-lactate dehydrogenase B chain                                                                                                                                  |
| 610                      | P07195           | 20                   | 325            | 65.6                  | 334    | 36639  | 6.1 | Isocitrate dehydrogenase [NADP] cytoplasmic                                                                                                                      |
| 611                      | Q75874           | 20                   | 76             | 61.4                  | 414    | 46659  | 7   | tRNA-splicing ligase RtcB log                                                                                                                                    |
| 612                      | Q9Y3J0           | 20                   | 51             | 56.8                  | 505    | 55210  | 7.2 | 26S proteasome non-ATPase regulatory subunit 11                                                                                                                  |
| 613                      | O00231           | 20                   | 43             | 56.6                  | 422    | 47464  | 6.5 | Uridine 5'-monophosphate synthase                                                                                                                                |
| 614                      | P11172           | 20                   | 57             | 55                    | 480    | 52222  | 7.2 | Isoform 2 of UTP--glucose-1-phosphate uridylyltransferase                                                                                                        |
| 615                      | Q16851-2         | 20                   | 44             | 56.7                  | 497    | 55677  | 7.9 | UTP--glucose-1-phosphate uridylyltransferase                                                                                                                     |
| 615                      | Q16851           | 20                   | 44             | 55.5                  | 508    | 56940  | 8.1 | Uncharacterized protein                                                                                                                                          |
| 615                      | C9JKD6           | 20                   | 44             | 55.5                  | 508    | 56967  | 7.9 |                                                                                                                                                                  |

Table S1. Proteins identified in the OVCAR-3 tumor supernatant by two or more unique peptides.

| Protein or Group | Accession Number | Unique Peptide Count | Spectrum Count | Sequence Coverage (%) | Length | MolWt  | pI  | Descriptive Name                                                                                    |
|------------------|------------------|----------------------|----------------|-----------------------|--------|--------|-----|-----------------------------------------------------------------------------------------------------|
| 615              | B4DUP2           | 20                   | 44             | 54.5                  | 517    | 57791  | 8.1 | cDNA FLJ56155, highly similar to UTP--glucose-1-phosphate undyltransferase 2 (EC 2.7.7.9)           |
| 615              | E7EUC7           | 20                   | 44             | 54.5                  | 517    | 57805  | 8.1 | Uncharacterized protein                                                                             |
| 616              | Q16881-5         | 20                   | 49             | 59.3                  | 499    | 54604  | 6.5 | Isoform 5 of Thioredoxin reductase 1, cytoplasmic                                                   |
| 616              | E2QRB9           | 20                   | 49             | 54.7                  | 541    | 59580  | 7.3 | Uncharacterized protein                                                                             |
| 616              | B7Z2S5           | 20                   | 49             | 54.1                  | 547    | 60022  | 6.7 | cDNA FLJ56075, highly similar to Thioredoxin reductase 1, cytoplasmic (EC 1.8.1.9)                  |
| 616              | Q16881-4         | 20                   | 49             | 53.7                  | 551    | 60269  | 6.7 | Isoform 4 of Thioredoxin reductase 1, cytoplasmic                                                   |
| 616              | E9PNQ6           | 20                   | 49             | 52.1                  | 568    | 62036  | 6.7 | Uncharacterized protein                                                                             |
| 616              | E7ESI6           | 20                   | 49             | 49.7                  | 596    | 65360  | 8.1 | Uncharacterized protein                                                                             |
| 616              | E7EW10           | 20                   | 49             | 48.4                  | 612    | 67059  | 6.8 | Uncharacterized protein                                                                             |
| 616              | Q16881           | 20                   | 49             | 45.6                  | 649    | 70756  | 7.4 | Thioredoxin reductase 1, cytoplasmic                                                                |
| 616              | UPI0000D6223A    | 20                   | 49             | 45.5                  | 651    | 71153  | 7.5 | UPI0000D6223A UniRef100 entry                                                                       |
| 617              | D6REN6           | 20                   | 39             | 52.8                  | 489    | 54847  | 5.5 | Uncharacterized protein                                                                             |
| 617              | P12081           | 20                   | 39             | 50.7                  | 509    | 57411  | 5.9 | Histidyl-tRNA synthetase, cytoplasmic                                                               |
| 618              | B4DTU0           | 20                   | 89             | 48.1                  | 570    | 63665  | 7.3 | cDNA FLJ59249, highly similar to CD166 antigen                                                      |
| 618              | UPI0000EE206C    | 20                   | 89             | 48.1                  | 570    | 63634  | 7.7 | UPI0000EE206C UniRef100 entry                                                                       |
| 618              | Q13740-2         | 20                   | 89             | 48.1                  | 570    | 63666  | 7.1 | Isoform 2 of CD166 antigen                                                                          |
| 618              | Q13740           | 20                   | 89             | 47                    | 583    | 65102  | 6.3 | CD166 antigen                                                                                       |
| 619              | P11413-2         | 20                   | 30             | 44                    | 561    | 63827  | 6.9 | Isoform Long of Glucose-6-phosphate 1-dehydrogenase                                                 |
| 620              | Q14247           | 20                   | 179            | 44                    | 550    | 61586  | 5.4 | Src substrate cortactin                                                                             |
| 620              | Q53HG7           | 20                   | 179            | 44                    | 550    | 61558  | 5.4 | Cortactin isoform a variant (Fragment)                                                              |
| 621              | B7Z8X5           | 20                   | 86             | 43.7                  | 483    | 52703  | 7.9 | cDNA FLJ61541, highly similar to sapiens PDZ and LIM domain 5 (PDLIM5), transcript variant 2, mRNA  |
| 622              | Q01813           | 20                   | 48             | 42.1                  | 784    | 85596  | 7.6 | 6-phosphofruktokinase type C                                                                        |
| 623              | Q76094           | 20                   | 55             | 39                    | 671    | 74606  | 9.3 | Signal recognition particle 72 kDa protein                                                          |
| 624              | Q16643           | 20                   | 61             | 35.3                  | 649    | 71429  | 4.5 | Drebrin                                                                                             |
| 624              | UPI000013E0B5    | 20                   | 61             | 35.3                  | 649    | 71439  | 4.5 | drebrin isoform a                                                                                   |
| 625              | Q13617           | 20                   | 33             | 35.8                  | 745    | 86983  | 6.9 | Cullin-2                                                                                            |
| 625              | B7Z6K8           | 20                   | 33             | 34.9                  | 764    | 89504  | 7.1 | cDNA FLJ56037, highly similar to Cullin-2                                                           |
| 625              | UPI0000EE4467    | 20                   | 33             | 34.9                  | 764    | 89492  | 7.1 | cullin-2 isoform a                                                                                  |
| 626              | Q43747           | 20                   | 101            | 33.7                  | 822    | 91351  | 6.8 | AP-1 complex subunit gamma-1                                                                        |
| 626              | Q81Y97           | 20                   | 101            | 33.6                  | 825    | 91757  | 6.8 | Adaptor-related protein complex 1, gamma 1 subunit                                                  |
| 626              | Q43747-2         | 20                   | 101            | 33.6                  | 825    | 91723  | 6.8 | Isoform 2 of AP-1 complex subunit gamma-1                                                           |
| 627              | Q12959-5         | 20                   | 53             | 35.5                  | 853    | 95166  | 6   | Isoform 5 of Disks large log 1                                                                      |
| 627              | Q12959-3         | 20                   | 53             | 34.8                  | 871    | 97076  | 5.9 | Isoform 3 of Disks large log 1                                                                      |
| 627              | Q12959           | 20                   | 53             | 33.5                  | 904    | 100455 | 5.8 | Disks large log 1                                                                                   |
| 628              | Q14139           | 20                   | 51             | 29.8                  | 1066   | 122560 | 5.2 | Ubiquitin conjugation factor E4 A                                                                   |
| 628              | Q14139-2         | 20                   | 51             | 29.6                  | 1073   | 123522 | 5.2 | Isoform 2 of Ubiquitin conjugation factor E4 A                                                      |
| 629              | Q94985-2         | 20                   | 42             | 28.9                  | 971    | 108643 | 4.9 | Isoform 2 of Calsyntenin-1                                                                          |
| 629              | Q94985           | 20                   | 42             | 28.6                  | 981    | 109793 | 4.9 | Calsyntenin-1                                                                                       |
| 630              | P28340           | 20                   | 20             | 24.9                  | 1107   | 123631 | 7   | DNA polymerase delta catalytic subunit                                                              |
| 630              | E7EYVW0          | 20                   | 20             | 24.4                  | 1133   | 126388 | 7.2 | DNA polymerase                                                                                      |
| 631              | Q9C0E2           | 20                   | 40             | 24.2                  | 1151   | 130139 | 5   | Exportin-4                                                                                          |
| 631              | UPI00015DFDED    | 20                   | 40             | 24.2                  | 1151   | 130153 | 5.1 | Exportin-4 (Exp4).                                                                                  |
| 632              | B7ZKM9           | 20                   | 28             | 20.5                  | 1408   | 154303 | 6.4 | NEO1 protein                                                                                        |
| 632              | Q92859-2         | 20                   | 28             | 20.5                  | 1408   | 154304 | 6.4 | Isoform 2 of Neogenin                                                                               |
| 632              | Q92859           | 20                   | 28             | 19.8                  | 1461   | 160016 | 6.5 | Neogenin                                                                                            |
| 633              | Q6YHK3           | 20                   | 27             | 17.4                  | 1445   | 161688 | 5.8 | CD109 antigen                                                                                       |
| 634              | Q9P265           | 20                   | 23             | 17.3                  | 1576   | 171491 | 8.1 | Disco-interacting protein 2 log B                                                                   |
| 635              | Q92621           | 20                   | 36             | 14                    | 2012   | 227919 | 6.2 | Nuclear pore complex protein Nup205                                                                 |
| 636              | P58107           | 20                   | 69             | 8.3                   | 5090   | 556629 | 5.6 | Epiplakin                                                                                           |
| 637              | P62333           | 19                   | 104            | 58.4                  | 389    | 44173  | 7.5 | 26S protease regulatory subunit 10B 26S protease regulatory subunit 10B                             |
| 637              | UPI00001FD556    | 19                   | 104            | 56.3                  | 403    | 45797  | 7.8 | 26S protease regulatory subunit 10B                                                                 |
| 638              | Q3U6V5           | 19                   | 50             | 63.3                  | 387    | 43572  | 5.4 | Putative uncharacterized protein                                                                    |
| 638              | Q96CG1           | 19                   | 50             | 60.6                  | 404    | 45463  | 5.6 | ETF1 protein                                                                                        |
| 638              | B7Z7P8           | 19                   | 50             | 57.9                  | 423    | 47476  | 5.6 | factor subunit1                                                                                     |
| 638              | Q3TL10           | 19                   | 50             | 56.1                  | 437    | 48973  | 5.8 | Putative uncharacterized protein                                                                    |
| 638              | Q3TF02           | 19                   | 50             | 56.1                  | 437    | 49030  | 5.8 | Putative uncharacterized protein                                                                    |
| 638              | P62495           | 19                   | 50             | 56.1                  | 437    | 49031  | 5.7 | Eukaryotic peptide chain release factor subunit 1 Eukaryotic peptide chain release factor subunit 1 |
| 639              | D3Z2H9           | 19                   | 63             | 52.8                  | 248    | 28992  | 4.8 | Uncharacterized protein                                                                             |
| 639              | Q58E70           | 19                   | 63             | 52.8                  | 248    | 29021  | 4.8 | Tpm3 protein                                                                                        |
| 639              | E2RB38           | 19                   | 63             | 52.8                  | 248    | 29033  | 4.8 | Uncharacterized protein                                                                             |
| 640              | Q9R1P4           | 19                   | 65             | 81.7                  | 263    | 29547  | 6.4 | Proteasome subunit alpha type-1                                                                     |
| 641              | Q9CVB6           | 19                   | 73             | 74                    | 300    | 34357  | 7.3 | Actin-related protein 2/3 complex subunit 2                                                         |
| 642              | Q9D1A2           | 19                   | 32             | 68                    | 475    | 52767  | 5.7 | Cytosolic non-specific dipeptidase                                                                  |
| 643              | Q91XF8           | 19                   | 102            | 63.5                  | 395    | 45029  | 5.5 | Apolipoprotein A-IV                                                                                 |
| 643              | Q9DBN0           | 19                   | 102            | 63.5                  | 395    | 45044  | 5.5 | Putative uncharacterized protein                                                                    |
| 644              | Q5HZJ8           | 19                   | 52             | 53.1                  | 414    | 46674  | 7.2 | Isocitrate dehydrogenase [NADP]                                                                     |
| 644              | Q3UAV7           | 19                   | 52             | 53.1                  | 414    | 46674  | 7.2 | Isocitrate dehydrogenase [NADP]                                                                     |
| 644              | Q88844           | 19                   | 52             | 53.1                  | 414    | 46660  | 6.9 | Isocitrate dehydrogenase [NADP] cytoplasmic                                                         |
| 644              | E9PWT9           | 19                   | 52             | 52.3                  | 421    | 47474  | 6.9 | Uncharacterized protein                                                                             |
| 644              | Q8C338           | 19                   | 52             | 52.1                  | 422    | 47545  | 6.9 | Isocitrate dehydrogenase [NADP]                                                                     |
| 645              | Q8VCM7           | 19                   | 178            | 51.8                  | 436    | 49391  | 5.9 | Fibrinogen gamma chain                                                                              |
| 645              | Q3UER8           | 19                   | 178            | 51                    | 443    | 50349  | 5.6 | Putative uncharacterized protein                                                                    |
| 646              | E9Q5J9           | 19                   | 61             | 46.3                  | 285    | 33281  | 4.8 | Uncharacterized protein                                                                             |
| 647              | Q08528           | 19                   | 49             | 26.7                  | 917    | 102535 | 6.1 | Hexokinase-2                                                                                        |
| 648              | Q9Z1Z0-2         | 19                   | 153            | 28.1                  | 897    | 100195 | 5   | Isoform 2 of General vesicular transport factor p115                                                |
| 648              | Q9Z1Z0           | 19                   | 153            | 26.3                  | 959    | 106983 | 4.9 | General vesicular transport factor p115                                                             |
| 649              | P28271           | 19                   | 48             | 26.1                  | 889    | 98179  | 7.5 | Cytoplasmic aconitase hydratase                                                                     |
| 649              | Q3TQ15           | 19                   | 48             | 26.1                  | 889    | 98126  | 7.5 | Aconitase 1                                                                                         |
| 649              | Q8VDC3           | 19                   | 48             | 25.8                  | 899    | 99103  | 7.3 | Cytoplasmic aconitase                                                                               |
| 650              | B2RX13           | 19                   | 33             | 17.8                  | 1475   | 165118 | 7.1 | Peroxidase homolog (Drosophila)                                                                     |
| 650              | Q3UQ28           | 19                   | 33             | 17.8                  | 1475   | 165133 | 7.1 | Peroxidase homolog                                                                                  |
| 650              | E9Q9Q9           | 19                   | 33             | 17.8                  | 1475   | 165102 | 7.1 | Uncharacterized protein                                                                             |
| 651              | B1AY13           | 19                   | 40             | 10.7                  | 2617   | 293999 | 6.2 | Ubiquitin carboxyl-terminal hydrolase 24                                                            |
| 651              | E9PV45           | 19                   | 40             | 10.7                  | 2618   | 294128 | 6.2 | Uncharacterized protein                                                                             |
| 652              | Q99497           | 19                   | 201            | 87.3                  | 189    | 19891  | 6.8 | Protein DJ-1                                                                                        |
| 653              | P00918           | 19                   | 79             | 83.5                  | 260    | 29246  | 7.4 | Carbonic anhydrase 2                                                                                |
| 654              | P06132           | 19                   | 87             | 81.5                  | 367    | 40787  | 6.1 | Uroporphyrinogen decarboxylase                                                                      |
| 655              | P04406           | 19                   | 930            | 78.5                  | 335    | 36053  | 8.5 | Glyceraldehyde-3-phosphate dehydrogenase                                                            |
| 656              | P11766           | 19                   | 79             | 75.1                  | 374    | 39724  | 7.5 | Alcohol dehydrogenase class-3                                                                       |
| 657              | Q15144           | 19                   | 74             | 74                    | 300    | 34333  | 7.3 | Actin-related protein 2/3 complex subunit 2                                                         |
| 658              | Q9UL46           | 19                   | 117            | 74.9                  | 239    | 27402  | 5.7 | Proteasome activator complex subunit 2                                                              |
| 658              | Q2TNB3           | 19                   | 117            | 74.9                  | 239    | 27349  | 5.6 | Cell migration-inducing protein 22                                                                  |
| 658              | A8MZ76           | 19                   | 117            | 71.9                  | 249    | 28602  | 6.4 | Uncharacterized protein                                                                             |
| 658              | C9JE52           | 19                   | 117            | 70.5                  | 254    | 29127  | 6.7 | Uncharacterized protein                                                                             |
| 659              | P14923           | 19                   | 170            | 66.8                  | 745    | 81745  | 6.1 | Junction plakoglobin                                                                                |
| 660              | P23193           | 19                   | 77             | 65.1                  | 301    | 33970  | 8.4 | Transcription elongation factor A protein 1                                                         |
| 661              | P23528           | 19                   | 993            | 78.3                  | 166    | 18502  | 8.1 | Cofilin-1                                                                                           |
| 661              | E9PK25           | 19                   | 993            | 63.7                  | 204    | 22728  | 8.3 | Uncharacterized protein                                                                             |

Table S1. Proteins identified in the OVCAR-3 tumor supernatant by two or more unique peptides.

| Protein or Protein Group | Accession Number | Unique Peptide Count | Spectrum Count | Sequence Coverage (%) | Length | MolWt  | pI   | Descriptive Name                                                                                                                     |
|--------------------------|------------------|----------------------|----------------|-----------------------|--------|--------|------|--------------------------------------------------------------------------------------------------------------------------------------|
| 662                      | A8K4T6           | 19                   | 42             | 58.7                  | 504    | 56224  | 5.6  | cDNA FLJ76282, highly similar to sapiens proteasome (prosome, macropain) 26S subunit, non-ATPase, 5 (PSMD5), mRNA                    |
| 662                      | Q16401           | 19                   | 42             | 58.7                  | 504    | 56196  | 5.5  | 26S proteasome non-ATPase regulatory subunit 5                                                                                       |
| 663                      | P30740           | 19                   | 52             | 55.4                  | 379    | 42742  | 6.3  | Leukocyte elastase inhibitor                                                                                                         |
| 664                      | O00232           | 19                   | 46             | 53.1                  | 456    | 52904  | 7.6  | 26S proteasome non-ATPase regulatory subunit 12                                                                                      |
| 665                      | B7Z4T9           | 19                   | 51             | 52.5                  | 499    | 54804  | 7.7  | Chaperonin containing TCP1, subunit 7 (Eta), isoform CRA_c                                                                           |
| 665                      | Q99832           | 19                   | 51             | 48.3                  | 543    | 59367  | 7.6  | T-complex protein 1 subunit eta                                                                                                      |
| 665                      | Q6IBT3           | 19                   | 51             | 48.3                  | 543    | 59329  | 7.6  | CCT7 protein                                                                                                                         |
| 665                      | Q53HV2           | 19                   | 51             | 48.3                  | 543    | 59341  | 7.6  | Chaperonin containing TCP1, subunit 7 (Eta) variant (Fragment)                                                                       |
| 666                      | P39023           | 19                   | 82             | 49.4                  | 403    | 46109  | 10.2 | 60S ribosomal protein L3                                                                                                             |
| 667                      | Q8IXW6           | 19                   | 33             | 53.2                  | 570    | 61979  | 6.5  | Dihydropyrimidinase-like 3                                                                                                           |
| 667                      | Q14195           | 19                   | 33             | 53.2                  | 570    | 61963  | 6.5  | Dihydropyrimidinase-related protein 3                                                                                                |
| 667                      | B3SXQ8           | 19                   | 33             | 44.3                  | 684    | 73911  | 6.4  | Collapsin response mediator protein 4 long variant                                                                                   |
| 668                      | Q59EF6           | 19                   | 56             | 38.3                  | 729    | 83109  | 5.1  | Calpain 2, large [catalytic] subunit variant (Fragment)                                                                              |
| 669                      | UPI0001AE6739    | 19                   | 74             | 38.5                  | 566    | 63397  | 8.5  | Septin-9 (MLL septin-like fusion protein) (MLL septin-like fusion protein MSF-A) (Ovarian/Breast septin) (Ov/Br septin) (Septin D1). |
| 669                      | Q9UHD8-7         | 19                   | 74             | 38.4                  | 567    | 63502  | 8.7  | Septin-9                                                                                                                             |
| 669                      | Q9UHD8-2         | 19                   | 74             | 38.4                  | 568    | 63666  | 8.4  | Septin-9                                                                                                                             |
| 669                      | Q9UHD8-5         | 19                   | 74             | 37.7                  | 579    | 64682  | 7.6  | Septin-9                                                                                                                             |
| 669                      | Q9UHD8           | 19                   | 74             | 37.2                  | 586    | 65402  | 9    | Septin-9                                                                                                                             |
| 670                      | Q09161           | 19                   | 44             | 37                    | 790    | 91839  | 6.4  | Nuclear cap-binding protein subunit 1                                                                                                |
| 671                      | P41226           | 19                   | 31             | 34.4                  | 1012   | 111694 | 6    | Ubiquitin-like modifier-activating enzyme 7                                                                                          |
| 672                      | B1AJV0           | 19                   | 35             | 32.8                  | 1005   | 117265 | 7.8  | SWI/SNF related, matrix associated, actin dependent regulator of chromatin, subfamily a, member 1 (Fragment)                         |
| 672                      | E9PCY3           | 19                   | 35             | 31.9                  | 1033   | 120589 | 8.1  | Uncharacterized protein                                                                                                              |
| 672                      | P28370           | 19                   | 35             | 31.3                  | 1054   | 122605 | 8.1  | Probable global transcription activator SNF2L1                                                                                       |
| 672                      | B7ZLQ5           | 19                   | 35             | 30.8                  | 1070   | 124327 | 8.4  | SMARCA1 protein                                                                                                                      |
| 673                      | Q9NZ08           | 19                   | 31             | 26.4                  | 941    | 107235 | 6.5  | Endoplasmic reticulum aminopeptidase 1                                                                                               |
| 673                      | Q9NZ08-2         | 19                   | 31             | 26.2                  | 948    | 107841 | 6.3  | Isoform 2 of Endoplasmic reticulum aminopeptidase 1                                                                                  |
| 674                      | Q9NTZ6           | 19                   | 45             | 26.1                  | 932    | 97396  | 8.6  | RNA-binding protein 12                                                                                                               |
| 675                      | Q15042           | 19                   | 27             | 25.6                  | 981    | 110524 | 5.6  | Rab3 GTPase-activating protein catalytic subunit                                                                                     |
| 675                      | C9J837           | 19                   | 27             | 25.4                  | 988    | 111285 | 5.5  | Uncharacterized protein                                                                                                              |
| 676                      | Q96T76           | 19                   | 55             | 25.2                  | 1030   | 113289 | 6.4  | MMS19 nucleotide excision repair protein log                                                                                         |
| 677                      | Q13435           | 19                   | 47             | 24.2                  | 895    | 100228 | 5.7  | Splicing factor 3B subunit 2                                                                                                         |
| 678                      | Q9HCE1           | 19                   | 30             | 23.6                  | 1003   | 113671 | 8.8  | Putative helicase MOV-10                                                                                                             |
| 679                      | O15357           | 19                   | 22             | 20.2                  | 1258   | 138599 | 6.5  | Phosphatidylinositol-3,4,5-trisphosphate 5-phosphatase 2                                                                             |
| 680                      | P50748           | 19                   | 24             | 11.8                  | 2209   | 250746 | 6    | Kinetochores-associated protein 1                                                                                                    |
| 681                      | O43149           | 19                   | 29             | 9.4                   | 2961   | 331075 | 5.9  | Zinc finger ZZ-type and EF-hand domain-containing protein 1                                                                          |
| 682                      | P63244           | 18                   | 206            | 84.2                  | 317    | 35077  | 7.7  | Guanine nucleotide-binding protein subunit beta-2-like 1                                                                             |
| 683                      | Q921M7           | 18                   | 38             | 74.1                  | 324    | 36776  | 6.1  | Protein FAM49B                                                                                                                       |
| 683                      | Q9NUQ9           | 18                   | 38             | 74.1                  | 324    | 36748  | 6.1  | Protein FAM49B                                                                                                                       |
| 684                      | Q59HD4           | 18                   | 534            | 67.3                  | 373    | 39525  | 7.1  | Poly(RC)-binding protein 2 isoform b variant (Fragment) Poly(RC)-binding protein 2 isoform b variant (Fragment)                      |
| 685                      | Q7L1Q6           | 18                   | 65             | 60.6                  | 419    | 48043  | 5.9  | Basic leucine zipper and W2 domain-containing protein 1 Basic leucine zipper and W2 domain-containing protein 1                      |
| 685                      | Q53FN7           | 18                   | 65             | 59.9                  | 424    | 48618  | 6.1  | BZW1 protein variant (Fragment)                                                                                                      |
| 685                      | B4DLZ8           | 18                   | 65             | 56.3                  | 451    | 51282  | 6.6  | cDNA FLJ55789, highly similar to Rattus norvegicus basic leucine zipper and W2 domains 1 (Bzw1), mRNA                                |
| 686                      | P61201           | 18                   | 122            | 53.7                  | 443    | 51597  | 5.5  | COP9 signalosome complex subunit 2 COP9 signalosome complex subunit 2                                                                |
| 687                      | D3YVE6           | 18                   | 99             | 53.4                  | 266    | 30038  | 10.5 | MCG18601                                                                                                                             |
| 687                      | Q6P1A9           | 18                   | 99             | 53.4                  | 266    | 30025  | 10.6 | Ribosomal protein L7A                                                                                                                |
| 687                      | Q5EBG5           | 18                   | 99             | 53.4                  | 266    | 29905  | 10.6 | Ribosomal protein L7A                                                                                                                |
| 687                      | P62424           | 18                   | 99             | 53.4                  | 266    | 29996  | 10.6 | 60S ribosomal protein L7a                                                                                                            |
| 687                      | P12970           | 18                   | 99             | 53.4                  | 266    | 29977  | 10.6 | 60S ribosomal protein L7a                                                                                                            |
| 687                      | Q8OUT7           | 18                   | 99             | 52.6                  | 270    | 30474  | 10.6 | Rpl7a protein (Fragment)                                                                                                             |
| 688                      | P09651-3         | 18                   | 578            | 70.4                  | 267    | 29386  | 9.1  | Isoform 2 of Heterogeneous nuclear ribonucleoprotein A1                                                                              |
| 688                      | Q3U7F3           | 18                   | 578            | 58.8                  | 320    | 34238  | 9.2  | Putative uncharacterized protein                                                                                                     |
| 688                      | P49312           | 18                   | 578            | 58.8                  | 320    | 34196  | 9.2  | Heterogeneous nuclear ribonucleoprotein A1 Heterogeneous nuclear ribonucleoprotein A1                                                |
| 688                      | P09651           | 18                   | 578            | 50.5                  | 372    | 38747  | 9.1  | Heterogeneous nuclear ribonucleoprotein A1                                                                                           |
| 688                      | E1BK85           | 18                   | 578            | 50.4                  | 373    | 38804  | 9.1  | Uncharacterized protein                                                                                                              |
| 688                      | Q5EBP8           | 18                   | 578            | 50.4                  | 373    | 38834  | 9.1  | Heterogeneous nuclear ribonucleoprotein A1                                                                                           |
| 689                      | P35235           | 18                   | 35             | 40.4                  | 597    | 68460  | 7.3  | Tyrosine-protein phosphatase non-receptor type 11                                                                                    |
| 689                      | Q06124           | 18                   | 35             | 40.4                  | 597    | 68436  | 7.3  | Tyrosine-protein phosphatase non-receptor type 11                                                                                    |
| 690                      | Q92841           | 18                   | 97             | 32.3                  | 650    | 72372  | 8.6  | Probable ATP-dependent RNA helicase DDX17                                                                                            |
| 690                      | Q501J6           | 18                   | 97             | 32.3                  | 650    | 72400  | 8.6  | Probable ATP-dependent RNA helicase DDX17                                                                                            |
| 690                      | Q3U741           | 18                   | 97             | 32.2                  | 652    | 72585  | 8.7  | DEAD (Asp-Glu-Ala-Asp) box polypeptide 17, isoform CRA_a                                                                             |
| 690                      | Q92841-3         | 18                   | 97             | 32.2                  | 652    | 72557  | 8.7  | Isoform 3 of Probable ATP-dependent RNA helicase DDX17                                                                               |
| 690                      | UPI00003670EA    | 18                   | 97             | 28.8                  | 729    | 80255  | 8.3  | UPI00003670EA UniRef100 entry                                                                                                        |
| 690                      | Q92841-4         | 18                   | 97             | 28.8                  | 729    | 80273  | 8.3  | Isoform 4 of Probable ATP-dependent RNA helicase DDX17                                                                               |
| 690                      | UPI0001AE634C    | 18                   | 97             | 28.7                  | 731    | 80440  | 8.4  | UPI0001AE634C UniRef100 entry                                                                                                        |
| 690                      | UPI0001533DB4    | 18                   | 97             | 28.7                  | 731    | 80458  | 8.4  | probable ATP-dependent RNA helicase DDX17 isoform 3                                                                                  |
| 690                      | Q59F66           | 18                   | 97             | 28.5                  | 737    | 81068  | 7.9  | DEAD box polypeptide 17 isoform p82 variant (Fragment)                                                                               |
| 691                      | E7EVJ5           | 18                   | 50             | 17.6                  | 1227   | 142577 | 7.2  | Uncharacterized protein                                                                                                              |
| 691                      | E7EVF4           | 18                   | 50             | 17.2                  | 1253   | 145673 | 7.1  | Uncharacterized protein                                                                                                              |
| 691                      | Q96F07-2         | 18                   | 50             | 17.2                  | 1253   | 145673 | 7.1  | Isoform 2 of Cytoplasmic FMR1-interacting protein 2                                                                                  |
| 691                      | Q5SQX6           | 18                   | 50             | 17.2                  | 1253   | 145659 | 7.1  | Cytoplasmic FMR1-interacting protein 2                                                                                               |
| 692                      | B7STB7           | 18                   | 51             | 56.6                  | 346    | 38750  | 7.4  | Annexin A1                                                                                                                           |
| 692                      | Q4FK88           | 18                   | 51             | 56.6                  | 346    | 38734  | 7.7  | Anxa1 protein                                                                                                                        |
| 692                      | P10107           | 18                   | 51             | 56.6                  | 346    | 38734  | 7.4  | Annexin A1                                                                                                                           |
| 693                      | Q3UKP2           | 18                   | 129            | 51.7                  | 460    | 51318  | 7.8  | Hemopexin, isoform CRA_f                                                                                                             |
| 693                      | Q91X72           | 18                   | 129            | 51.7                  | 460    | 51341  | 7.8  | Hemopexin                                                                                                                            |
| 694                      | Q99J14           | 18                   | 39             | 48.6                  | 389    | 45536  | 5.5  | 26S proteasome non-ATPase regulatory subunit 6                                                                                       |
| 695                      | Q19L12           | 18                   | 58             | 47.9                  | 512    | 56554  | 6.8  | Alpha-1B-glycoprotein                                                                                                                |
| 696                      | P80315           | 18                   | 34             | 47.5                  | 539    | 58066  | 8    | T-complex protein 1 subunit delta                                                                                                    |
| 696                      | Q3TII0           | 18                   | 34             | 47.5                  | 539    | 58084  | 8    | T-complex protein 1 subunit delta                                                                                                    |
| 697                      | Q61696           | 18                   | 306            | 47.1                  | 641    | 70079  | 5.7  | Heat shock 70 kDa protein 1A                                                                                                         |
| 697                      | Q3TAI8           | 18                   | 306            | 47.1                  | 641    | 70093  | 5.7  | Putative uncharacterized protein                                                                                                     |
| 697                      | P17879           | 18                   | 306            | 47                    | 642    | 70176  | 5.7  | Heat shock 70 kDa protein 1B                                                                                                         |
| 698                      | Q9D8E6           | 18                   | 103            | 43.4                  | 419    | 47154  | 11   | 60S ribosomal protein L4                                                                                                             |
| 699                      | P14733           | 18                   | 59             | 36.9                  | 588    | 66786  | 5.2  | Lamin-B1                                                                                                                             |
| 700                      | Q3V3W7           | 18                   | 47             | 35.5                  | 732    | 83206  | 6    | Putative uncharacterized protein                                                                                                     |
| 700                      | Q8BH61           | 18                   | 47             | 35.5                  | 732    | 83207  | 5.9  | Coagulation factor XIII A chain                                                                                                      |
| 701                      | P19221           | 18                   | 31             | 35.1                  | 618    | 70269  | 6.4  | Prothrombin                                                                                                                          |
| 702                      | P46460           | 18                   | 43             | 28.6                  | 744    | 82613  | 6.9  | Vesicle-fusing ATPase                                                                                                                |
| 703                      | A7ISP9           | 18                   | 55             | 25.6                  | 977    | 108710 | 6.4  | EMAP-like protein 4                                                                                                                  |
| 703                      | E9QML0           | 18                   | 55             | 25.3                  | 988    | 109972 | 6.5  | Uncharacterized protein                                                                                                              |
| 704                      | E9QLI1           | 18                   | 46             | 21.8                  | 1172   | 129896 | 4.8  | Uncharacterized protein                                                                                                              |
| 704                      | Q8CG21           | 18                   | 46             | 21.8                  | 1172   | 129882 | 4.8  | Thbs2                                                                                                                                |
| 704                      | Q03350           | 18                   | 46             | 21.8                  | 1172   | 129912 | 4.8  | Thrombospondin-2                                                                                                                     |

Table S1. Proteins identified in the OVCAR-3 tumor supernatant by two or more unique peptides.

| Protein or<br>Group | Accession Number | Unique<br>Peptide<br>Count | Spectrum<br>Count | Sequence<br>Coverage (%) | Length | MolWt  | pI   | Descriptive Name                                                                                                                                                     |
|---------------------|------------------|----------------------------|-------------------|--------------------------|--------|--------|------|----------------------------------------------------------------------------------------------------------------------------------------------------------------------|
| 705                 | P11087-2         | 18                         | 46                | 21.6                     | 1225   | 117821 | 5.7  | Isoform 2 of Collagen alpha-1(I) chain                                                                                                                               |
| 705                 | E9QKB9           | 18                         | 46                | 21.5                     | 1226   | 117918 | 5.7  | Uncharacterized protein                                                                                                                                              |
| 705                 | P11087           | 18                         | 46                | 18.2                     | 1453   | 138033 | 5.8  | Collagen alpha-1(I) chain                                                                                                                                            |
| 706                 | B9EKK3           | 18                         | 20                | 16.5                     | 1575   | 180550 | 5.6  | IQ motif containing GTPase activating protein 2                                                                                                                      |
| 706                 | Q3UQ44           | 18                         | 20                | 16.5                     | 1575   | 180527 | 5.6  | Ras GTPase-activating-like protein IQGAP2                                                                                                                            |
| 707                 | Q8BL66           | 18                         | 25                | 15.2                     | 1411   | 160914 | 5.8  | Early endosome antigen 1                                                                                                                                             |
| 708                 | A2ABW7           | 18                         | 45                | 6.2                      | 3718   | 404056 | 6.7  | Laminin, alpha 5                                                                                                                                                     |
| 708                 | Q61001           | 18                         | 45                | 6.2                      | 3718   | 404013 | 6.7  | Laminin subunit alpha-5                                                                                                                                              |
| 709                 | P11802           | 18                         | 38                | 81.5                     | 303    | 33730  | 7    | Cyclin-dependent kinase 4                                                                                                                                            |
| 710                 | P00491           | 18                         | 112               | 79.2                     | 289    | 32118  | 6.9  | Purine nucleoside phosphorylase                                                                                                                                      |
| 710                 | Q8N7G1           | 18                         | 112               | 78.2                     | 293    | 32551  | 7.2  | cDNA FLJ25678 fis, clone TST04067, highly similar to PURINE NUCLEOSIDE PHOSPHORYLASE (EC 2.4.2.1)                                                                    |
| 711                 | Q14914           | 18                         | 74                | 75.4                     | 329    | 35870  | 8.3  | Prostaglandin reductase 1                                                                                                                                            |
| 712                 | P23919           | 18                         | 35                | 74.5                     | 212    | 23819  | 8.3  | Thymidylate kinase                                                                                                                                                   |
| 713                 | Q9Y696           | 18                         | 74                | 70.8                     | 253    | 28772  | 5.6  | Chloride intracellular channel protein 4                                                                                                                             |
| 714                 | Q15366           | 18                         | 261               | 69.9                     | 365    | 38580  | 6.8  | Poly(rC)-binding protein 2                                                                                                                                           |
| 715                 | Q7L2H7           | 18                         | 81                | 69.8                     | 374    | 42503  | 5.6  | Eukaryotic translation initiation factor 3 subunit M                                                                                                                 |
| 716                 | P14550           | 18                         | 75                | 69.5                     | 325    | 36573  | 6.8  | Alcohol dehydrogenase [NADP+]                                                                                                                                        |
| 717                 | Q9UN52           | 18                         | 40                | 69                       | 423    | 47873  | 6.7  | COP9 signalosome complex subunit 3                                                                                                                                   |
| 717                 | Q9Y3F4           | 18                         | 76                | 70.6                     | 350    | 38438  | 5.1  | Serine-threonine kinase receptor-associated protein                                                                                                                  |
| 718                 | B4DNJ6           | 18                         | 76                | 68                       | 363    | 39778  | 5.3  | cDNA FLJ51909, highly similar to Serine-threonine kinase receptor-associated protein                                                                                 |
| 719                 | P17174           | 18                         | 48                | 65.9                     | 413    | 46248  | 7    | Aspartate aminotransferase, cytoplasmic                                                                                                                              |
| 720                 | P53582           | 18                         | 46                | 65.8                     | 386    | 43215  | 7.2  | Methionine aminopeptidase 1                                                                                                                                          |
| 721                 | Q53GN6           | 18                         | 43                | 65.7                     | 376    | 42917  | 5.7  | Proteasome 26S non-ATPase subunit 13 isoform 1 variant (Fragment)                                                                                                    |
| 721                 | Q9UNM6           | 18                         | 43                | 65.7                     | 376    | 42946  | 5.8  | 26S proteasome non-ATPase regulatory subunit 13                                                                                                                      |
| 722                 | Q53FE8           | 18                         | 60                | 65.1                     | 370    | 40572  | 5.1  | cDNA FLJ36526 fis, clone TRACH2003347, highly similar to NSFL1 cofactor p47 (Fragment)                                                                               |
| 723                 | B2RBP3           | 18                         | 52                | 64.8                     | 463    | 51822  | 5.5  | cDNA, FLJ95615, highly similar to sapiens ubiquitin-activating enzyme E1C (UBA3 log, yeast)(UBE1C), mRNA                                                             |
| 723                 | Q8TBC4           | 18                         | 52                | 64.8                     | 463    | 51852  | 5.5  | NEDD8-activating enzyme E1 catalytic subunit                                                                                                                         |
| 724                 | Q9Y266           | 18                         | 48                | 61.6                     | 331    | 38243  | 5.4  | Nuclear migration protein nudC                                                                                                                                       |
| 725                 | Q9NZL9           | 18                         | 36                | 59.6                     | 334    | 37552  | 7.4  | Methionine adenosyltransferase 2 subunit beta                                                                                                                        |
| 726                 | P35237           | 18                         | 51                | 58.8                     | 376    | 42622  | 5.3  | Serpin B6 (Placental thrombin inhibitor) (Cytoplasmic antiproteinase) (CAP) (Proteinase inhibitor 6) (PI-6)                                                          |
| 726                 | UPI00004155CD    | 18                         | 51                | 54                       | 409    | 46402  | 5.8  | 5'-nucleotidase domain-containing protein 1                                                                                                                          |
| 727                 | Q5TFE4           | 18                         | 44                | 58.5                     | 455    | 51845  | 6.3  | Putative deoxyribonuclease TATDN1                                                                                                                                    |
| 728                 | Q6P1N9           | 18                         | 46                | 56.9                     | 297    | 33602  | 7    | Protein phosphatase 1A                                                                                                                                               |
| 729                 | P35813           | 18                         | 26                | 56.5                     | 382    | 42448  | 5.4  | protein phosphatase 1A isoform 3                                                                                                                                     |
| 729                 | UPI0000E01530    | 18                         | 26                | 47.5                     | 455    | 51366  | 7.1  | Bifunctional ATP-dependent dihydroxyacetone kinase/FAD-AMP lyase (cyclizing)                                                                                         |
| 730                 | Q3LXA3           | 18                         | 35                | 54.1                     | 575    | 58947  | 7.5  | Eukaryotic translation initiation factor 2 subunit 3                                                                                                                 |
| 731                 | P41091           | 18                         | 43                | 53.4                     | 472    | 51110  | 8.4  | Uncharacterized protein                                                                                                                                              |
| 732                 | E7ETZ4           | 18                         | 48                | 53.9                     | 408    | 46913  | 8.4  | cDNA FLJ10398 fis, clone NT2RM4000349, highly similar to sapiens basic leucine zipper and W2 domains 2 (BZW2), mRNA                                                  |
| 732                 | B3KM68           | 18                         | 48                | 52.5                     | 419    | 48190  | 6.7  | Basic leucine zipper and W2 domain-containing protein 2                                                                                                              |
| 732                 | Q9Y6E2           | 18                         | 48                | 52.5                     | 419    | 48162  | 6.7  | V-type proton ATPase subunit B, brain isoform                                                                                                                        |
| 733                 | P21281           | 18                         | 41                | 52.1                     | 511    | 56501  | 5.8  | Tropomyosin 1 (Alpha) isoform 3                                                                                                                                      |
| 734                 | D9Y2V3           | 18                         | 52                | 51.4                     | 284    | 32737  | 4.8  | cDNA FLJ78270, highly similar to sapiens karyopherin alpha 2 (RAG cohort 1, importin alpha 1)(KPNA2), mRNA                                                           |
| 735                 | A8K7D9           | 18                         | 41                | 50.9                     | 529    | 57834  | 5.4  | Karyopherin alpha 2 (RAG cohort 1, importin alpha 1)                                                                                                                 |
| 735                 | Q6NVW7           | 18                         | 41                | 50.9                     | 529    | 57965  | 5.4  | Importin subunit alpha-2                                                                                                                                             |
| 735                 | P52292           | 18                         | 41                | 50.9                     | 529    | 57862  | 5.4  | Secernin-1                                                                                                                                                           |
| 736                 | Q12765           | 18                         | 50                | 52.7                     | 414    | 46382  | 4.8  | cDNA FLJ59687, highly similar to Secernin-1                                                                                                                          |
| 736                 | B4DHM0           | 18                         | 50                | 50.2                     | 434    | 48843  | 4.8  | Uncharacterized protein                                                                                                                                              |
| 737                 | E7EWF1           | 18                         | 125               | 46.6                     | 406    | 45499  | 11   | 60S ribosomal protein L4                                                                                                                                             |
| 737                 | P36578           | 18                         | 125               | 44.3                     | 427    | 47697  | 11.1 | Ribosomal protein L4 variant (Fragment)                                                                                                                              |
| 737                 | Q59GY2           | 18                         | 125               | 42.9                     | 441    | 48996  | 11   | Leucine-rich repeat-containing protein 47                                                                                                                            |
| 738                 | Q8N1G4           | 18                         | 79                | 45.3                     | 583    | 63473  | 8.3  | Phosphoacetylglucosamine mutase                                                                                                                                      |
| 739                 | Q95394           | 18                         | 46                | 46.1                     | 542    | 59852  | 6.3  | cDNA FLJ55543, highly similar to Phosphoacetylglucosamine mutase (EC 5.4.2.3)                                                                                        |
| 739                 | B4DX94           | 18                         | 46                | 43.9                     | 570    | 62911  | 6.1  | Bifunctional 3'-phosphoadenosine 5'-phosphosulfate synthase 1                                                                                                        |
| 740                 | O43252           | 18                         | 74                | 43.6                     | 624    | 70833  | 6.9  | Asparaginyl-tRNA synthetase, cytoplasmic                                                                                                                             |
| 741                 | Q43776           | 18                         | 87                | 42.3                     | 548    | 62943  | 6.3  | Coronin-1C                                                                                                                                                           |
| 742                 | Q9ULV4           | 18                         | 50                | 45.1                     | 474    | 53249  | 7.1  | Coronin, actin binding protein, 1C variant (Fragment)                                                                                                                |
| 742                 | Q53G58           | 18                         | 50                | 45.1                     | 474    | 53281  | 7.1  | Coronin, actin binding protein, 1C variant (Fragment)                                                                                                                |
| 742                 | Q59EA2           | 18                         | 50                | 42.7                     | 507    | 56370  | 8.2  | Coronin-1C_i3 protein                                                                                                                                                |
| 742                 | A7MAP1           | 18                         | 50                | 40.6                     | 521    | 58948  | 7.8  | cDNA FLJ61346, highly similar to Protein transport protein Sec23B                                                                                                    |
| 743                 | B4DRA5           | 18                         | 36                | 39.8                     | 742    | 83810  | 7.1  | Protein transport protein Sec23B                                                                                                                                     |
| 743                 | Q15437           | 18                         | 36                | 38.5                     | 767    | 86479  | 6.9  | Signal recognition particle 68 kDa protein                                                                                                                           |
| 744                 | Q9UHB9           | 18                         | 82                | 39.1                     | 627    | 70730  | 8.6  | Tumor necrosis factor alpha-induced protein 2                                                                                                                        |
| 745                 | Q03169           | 18                         | 55                | 36.9                     | 654    | 72661  | 6.5  | Uncharacterized protein                                                                                                                                              |
| 746                 | E9PG40           | 18                         | 57                | 31.5                     | 714    | 80833  | 4.8  | Isoform L-APP733 of Amyloid beta A4 protein                                                                                                                          |
| 746                 | P05067-7         | 18                         | 57                | 30.7                     | 733    | 82916  | 4.8  | cDNA FLJ50531, highly similar to Amyloid beta A4 protein (APP) (ABPP)(Alzheimer disease amyloid protein log)                                                         |
| 746                 | B4DI18           | 18                         | 57                | 30.2                     | 746    | 84521  | 4.8  | Isoform APP751 of Amyloid beta A4 protein                                                                                                                            |
| 746                 | P05067-8         | 18                         | 57                | 30                       | 751    | 84819  | 4.8  | Isoform L-APP752 of Amyloid beta A4 protein                                                                                                                          |
| 746                 | P05067-9         | 18                         | 57                | 29.9                     | 752    | 85040  | 4.8  | Amyloid beta A4 protein                                                                                                                                              |
| 746                 | P05067           | 18                         | 57                | 29.2                     | 770    | 86943  | 4.8  | 2'-5'-oligoadenylate synthase 3                                                                                                                                      |
| 747                 | Q9Y6K5           | 18                         | 23                | 29.3                     | 1087   | 121170 | 8.4  | Uncharacterized protein                                                                                                                                              |
| 748                 | E9PL22           | 18                         | 31                | 29.6                     | 937    | 104779 | 5.7  | cDNA FLJ56074, highly similar to 150 kDa oxygen-regulated protein (Orp150)                                                                                           |
| 748                 | B7Z2N4           | 18                         | 31                | 28.2                     | 981    | 109705 | 6.1  | Hypoxia up-regulated protein 1                                                                                                                                       |
| 748                 | Q9Y4L1           | 18                         | 31                | 27.7                     | 999    | 111335 | 5.2  | Elongation factor 1-delta                                                                                                                                            |
| 749                 | P29692           | 18                         | 157               | 63.3                     | 281    | 31122  | 5    | UPI000179584C UniRef100 entry                                                                                                                                        |
| 749                 | UPI000179584C    | 18                         | 157               | 27.6                     | 646    | 71266  | 6.4  | cDNA, FLJ95068, highly similar to sapiens eukaryotic translation elongation factor 1 delta (guanine nucleotide exchange protein) (EEF1D), transcript variant 1, mRNA |
| 749                 | B2RAR6           | 18                         | 157               | 27.5                     | 647    | 71450  | 6.4  | Isoform 2 of Elongation factor 1-delta                                                                                                                               |
| 749                 | P29692-2         | 18                         | 157               | 27.5                     | 647    | 71408  | 6.4  | Eukaryotic translation elongation factor 1 delta (Guanine nucleotide exchange protein), isoform CRA_b                                                                |
| 749                 | D3DWK1           | 18                         | 157               | 27.5                     | 647    | 71422  | 6.4  | Uncharacterized protein                                                                                                                                              |
| 749                 | E9PRY8           | 18                         | 157               | 25.5                     | 697    | 76570  | 7    | La-related protein 1                                                                                                                                                 |
| 750                 | Q6PKG0           | 18                         | 97                | 23.2                     | 1096   | 123510 | 8.8  | Protein flightless-1 log                                                                                                                                             |
| 751                 | Q13045           | 18                         | 18                | 17.5                     | 1269   | 144751 | 6.1  | Isoform 1 of Afadin                                                                                                                                                  |
| 752                 | P55196-2         | 18                         | 58                | 16.5                     | 1612   | 181998 | 6.5  | Uncharacterized protein                                                                                                                                              |
| 752                 | C9JX92           | 18                         | 58                | 15.3                     | 1743   | 197637 | 6.5  | Isoform 3 of Afadin                                                                                                                                                  |
| 752                 | P55196-3         | 18                         | 58                | 15.3                     | 1743   | 197652 | 6.5  | Isoform 2 of Afadin                                                                                                                                                  |
| 752                 | P55196-1         | 18                         | 58                | 14.6                     | 1816   | 205604 | 6.8  | Insulin-like growth factor 2 receptor variant (Fragment)                                                                                                             |
| 753                 | Q59EZ3           | 18                         | 21                | 9.7                      | 2414   | 266112 | 5.8  | Uncharacterized protein                                                                                                                                              |
| 753                 | E7ENI8           | 18                         | 21                | 9.4                      | 2491   | 274387 | 5.9  | Uncharacterized protein                                                                                                                                              |

Table S1. Proteins identified in the OVCAR-3 tumor supernatant by two or more unique peptides.

| Protein or Group | Accession Number | Unique Peptide Count | Spectrum Count | Sequence Coverage (%) | Length | MolWt  | pI   | Descriptive Name                                                                                                                                                                        |
|------------------|------------------|----------------------|----------------|-----------------------|--------|--------|------|-----------------------------------------------------------------------------------------------------------------------------------------------------------------------------------------|
| 753              | P11717           | 18                   | 21             | 9.4                   | 2491   | 274373 | 5.9  | Cation-independent mannose-6-phosphate receptor                                                                                                                                         |
| 754              | P60510           | 17                   | 80             | 79.5                  | 307    | 35080  | 5.1  | Serine/threonine-protein phosphatase 4 catalytic subunit                                                                                                                                |
| 755              | Q16576           | 17                   | 53             | 74.8                  | 425    | 47820  | 5    | Serine/threonine-protein phosphatase 4 catalytic subunit                                                                                                                                |
| 755              | Q60973           | 17                   | 53             | 74.8                  | 425    | 47790  | 5    | Histone-binding protein RBBP7                                                                                                                                                           |
| 755              | Q3UJ12           | 17                   | 53             | 74.8                  | 425    | 47776  | 5    | Putative uncharacterized protein                                                                                                                                                        |
| 756              | Q5R507           | 17                   | 92             | 63.6                  | 272    | 30629  | 6    | F-actin-capping protein subunit beta                                                                                                                                                    |
| 756              | B2R7T8           | 17                   | 92             | 63.6                  | 272    | 30657  | 6    | cDNA, FLJ93598, highly similar to sapiens capping protein (actin filament) muscle Z-line, beta (CAPZB), mRNA                                                                            |
| 756              | A2AMV7           | 17                   | 92             | 57.5                  | 301    | 33767  | 6.4  | CAPZB3                                                                                                                                                                                  |
| 756              | B1AK88           | 17                   | 92             | 57.5                  | 301    | 33781  | 6.4  | Capping protein (Actin filament) muscle Z-line, beta                                                                                                                                    |
| 756              | E7EQ40           | 17                   | 92             | 51.8                  | 334    | 37455  | 6.1  | Uncharacterized protein                                                                                                                                                                 |
| 757              | P38919           | 17                   | 38             | 57.2                  | 411    | 46871  | 6.7  | Eukaryotic initiation factor 4A-III                                                                                                                                                     |
| 757              | Q91VC3           | 17                   | 38             | 57.2                  | 411    | 46840  | 6.7  | Eukaryotic initiation factor 4A-III                                                                                                                                                     |
| 758              | Q35737           | 17                   | 191            | 51.2                  | 449    | 49199  | 6.3  | Heterogeneous nuclear ribonucleoprotein H                                                                                                                                               |
| 758              | P31943           | 17                   | 191            | 51.2                  | 449    | 49229  | 6.3  | Heterogeneous nuclear ribonucleoprotein H                                                                                                                                               |
| 758              | UPI00001AF4DD    | 17                   | 191            | 48.7                  | 472    | 51230  | 6.8  | Heterogeneous nuclear ribonucleoprotein H (hnRNP H)                                                                                                                                     |
| 758              | Q8C2Q7           | 17                   | 191            | 48.7                  | 472    | 51218  | 6.8  | Heterogeneous nuclear ribonucleoprotein H1                                                                                                                                              |
| 759              | E7EU96           | 17                   | 51             | 50.9                  | 385    | 45311  | 7.9  | Uncharacterized protein                                                                                                                                                                 |
| 759              | Q8R0X4           | 17                   | 51             | 50.1                  | 391    | 45134  | 7.7  | Casein kinase 2, alpha 1 polypeptide                                                                                                                                                    |
| 759              | Q61177           | 17                   | 51             | 50.1                  | 391    | 45180  | 7.7  | Casein kinase II alpha subunit                                                                                                                                                          |
| 759              | P68400           | 17                   | 51             | 50.1                  | 391    | 45144  | 7.7  | Casein kinase II subunit alpha                                                                                                                                                          |
| 759              | E7EN85           | 17                   | 51             | 49.6                  | 395    | 45682  | 7.9  | Uncharacterized protein                                                                                                                                                                 |
| 759              | Q5U5J2           | 17                   | 51             | 49.4                  | 397    | 45909  | 7.9  | CSNK2A1 protein                                                                                                                                                                         |
| 760              | P60228           | 17                   | 84             | 45.8                  | 445    | 52221  | 6    | Eukaryotic translation initiation factor 3 subunit E                                                                                                                                    |
| 760              | Q61AX5           | 17                   | 84             | 45.8                  | 445    | 52206  | 6    | translation initiation factor 3 subunit E                                                                                                                                               |
| 760              | Q3T102           | 17                   | 84             | 45.8                  | 445    | 52191  | 6    | EIF3S6 protein                                                                                                                                                                          |
| 761              | Q7TQ13           | 17                   | 105            | 85.2                  | 271    | 31270  | 4.9  | Eukaryotic translation initiation factor 3 subunit E                                                                                                                                    |
| 762              | P37804           | 17                   | 106            | 77.1                  | 201    | 22576  | 8.8  | Ubiquitin thioesterase OTUB1                                                                                                                                                            |
| 763              | Q9CPV4           | 17                   | 27             | 76.8                  | 298    | 33317  | 5.5  | Transgelin                                                                                                                                                                              |
| 764              | P18760           | 17                   | 649            | 76.5                  | 166    | 18560  | 8.1  | Glyoxalase domain-containing protein 4                                                                                                                                                  |
| 765              | E9PZF0           | 17                   | 412            | 60.3                  | 267    | 30200  | 8.7  | Cofilin-1                                                                                                                                                                               |
| 766              | D326C3           | 17                   | 164            | 56.8                  | 264    | 29825  | 9.7  | Uncharacterized protein                                                                                                                                                                 |
| 766              | Q3UAC2           | 17                   | 164            | 56.8                  | 264    | 29913  | 9.7  | Uncharacterized protein                                                                                                                                                                 |
| 766              | P97351           | 17                   | 164            | 56.8                  | 264    | 29885  | 9.7  | Putative uncharacterized protein                                                                                                                                                        |
| 767              | P16125           | 17                   | 244            | 55.4                  | 334    | 36572  | 6.1  | 40S ribosomal protein S3a                                                                                                                                                               |
| 768              | Q3TJK3           | 17                   | 143            | 51.8                  | 417    | 46535  | 8.5  | L-lactate dehydrogenase B chain                                                                                                                                                         |
| 768              | Q5U4D0           | 17                   | 143            | 51.8                  | 417    | 46534  | 8.8  | Putative uncharacterized protein                                                                                                                                                        |
| 768              | Q3TWG9           | 17                   | 143            | 51.8                  | 417    | 46530  | 8.8  | Serpinh1 protein                                                                                                                                                                        |
| 769              | Q3UJK2           | 17                   | 218            | 49.7                  | 392    | 42914  | 8.4  | Putative uncharacterized protein                                                                                                                                                        |
| 769              | Q9CY58-2         | 17                   | 218            | 49.7                  | 392    | 42944  | 8.4  | Putative uncharacterized protein                                                                                                                                                        |
| 769              | Q9CY58           | 17                   | 218            | 47.9                  | 407    | 44714  | 8.5  | Isoform 2 of Plasminogen activator inhibitor 1 RNA-binding protein                                                                                                                      |
| 770              | Q00896           | 17                   | 168            | 48.5                  | 412    | 45823  | 5.4  | Plasminogen activator inhibitor 1 RNA-binding protein                                                                                                                                   |
| 771              | P45376           | 17                   | 42             | 46.5                  | 316    | 35732  | 7.2  | Alpha-1-antitrypsin 1-3                                                                                                                                                                 |
| 771              | UPI000060684B    | 17                   | 42             | 46.5                  | 316    | 35745  | 7.5  | Aldehyde reductase                                                                                                                                                                      |
| 771              | Q5U415           | 17                   | 42             | 46.5                  | 316    | 35746  | 7.2  | UPI000060684B UniRef100 entry                                                                                                                                                           |
| 772              | Q6P1B1           | 17                   | 52             | 44.6                  | 623    | 69591  | 5.5  | Aldo-keto reductase family 1, member B3 (Aldehyde reductase)                                                                                                                            |
| 773              | P27659           | 17                   | 64             | 43.4                  | 403    | 46124  | 10.2 | Xaa-Pro aminopeptidase 1                                                                                                                                                                |
| 773              | Q91VJ6           | 17                   | 64             | 43.4                  | 403    | 46110  | 10.2 | 60S ribosomal protein L3                                                                                                                                                                |
| 773              | Q3UB90           | 17                   | 64             | 43.4                  | 403    | 46080  | 10.2 | MCG11520, isoform CRA_b                                                                                                                                                                 |
| 773              | Q3UB67           | 17                   | 64             | 43.4                  | 403    | 46168  | 10.2 | Putative uncharacterized protein                                                                                                                                                        |
| 773              | Q3UB15           | 17                   | 64             | 43.4                  | 403    | 46124  | 10.2 | Putative uncharacterized protein                                                                                                                                                        |
| 774              | Q08879           | 17                   | 59             | 34.5                  | 705    | 78033  | 5.2  | Putative uncharacterized protein                                                                                                                                                        |
| 775              | B2RWX8           | 17                   | 44             | 32.2                  | 603    | 67261  | 7.5  | Fibulin-1                                                                                                                                                                               |
| 775              | Q61129           | 17                   | 44             | 32.2                  | 603    | 67235  | 7.4  | Complement component factor i                                                                                                                                                           |
| 776              | Q8CC78           | 17                   | 97             | 29.2                  | 706    | 79736  | 6    | Complement factor I                                                                                                                                                                     |
| 776              | Q3TCV6           | 17                   | 97             | 27.5                  | 749    | 84758  | 6.1  | Putative uncharacterized protein                                                                                                                                                        |
| 776              | Q8R1F1           | 17                   | 97             | 27.5                  | 749    | 84819  | 5.9  | Putative uncharacterized protein                                                                                                                                                        |
| 776              | Q8BQ71           | 17                   | 97             | 27.5                  | 749    | 84849  | 5.9  | Niban-like protein 1                                                                                                                                                                    |
| 776              | Q3UDW4           | 17                   | 97             | 27.5                  | 749    | 84765  | 5.9  | Putative uncharacterized protein                                                                                                                                                        |
| 776              | Q3UC84           | 17                   | 97             | 27.5                  | 749    | 84803  | 6    | Putative uncharacterized protein                                                                                                                                                        |
| 776              | Q3U813           | 17                   | 97             | 27.5                  | 749    | 84761  | 6    | Putative uncharacterized protein                                                                                                                                                        |
| 777              | A2A432           | 17                   | 44             | 21.6                  | 970    | 110699 | 8.4  | Cullin-4B                                                                                                                                                                               |
| 778              | UPI0000023CC5    | 17                   | 19             | 10.3                  | 2327   | 252305 | 5.4  | chondroitin sulfate proteoglycan 4 precursor                                                                                                                                            |
| 779              | E9Q7G0           | 17                   | 43             | 8.8                   | 2094   | 235628 | 5.9  | Uncharacterized protein                                                                                                                                                                 |
| 779              | Q80Y35           | 17                   | 43             | 8.8                   | 2094   | 235656 | 5.9  | Nuclear mitotic apparatus protein 1                                                                                                                                                     |
| 780              | P27348           | 17                   | 150            | 86.1                  | 245    | 27764  | 4.8  | 14-3-3 protein theta                                                                                                                                                                    |
| 781              | Q96FW1           | 17                   | 111            | 85.2                  | 271    | 31284  | 4.9  | Ubiquitin thioesterase OTUB1                                                                                                                                                            |
| 781              | UPI0001AE6C7D    | 17                   | 111            | 75                    | 308    | 35215  | 5.6  | UPI0001AE6C7D UniRef100 entry                                                                                                                                                           |
| 782              | P10768           | 17                   | 58             | 85.1                  | 282    | 31463  | 7    | S-formylglutathione hydrolase                                                                                                                                                           |
| 783              | Q13347           | 17                   | 43             | 75.7                  | 325    | 36502  | 5.6  | Eukaryotic translation initiation factor 3 subunit I                                                                                                                                    |
| 784              | Q94760           | 17                   | 44             | 75.4                  | 285    | 31122  | 5.8  | N(G),N(G)-dimethylarginine dimethylaminohydrolase 1                                                                                                                                     |
| 785              | Q15691           | 17                   | 137            | 74.3                  | 268    | 29999  | 5.1  | Microtubule-associated protein RP/EB family member 1                                                                                                                                    |
| 786              | Q13126           | 17                   | 72             | 73.9                  | 283    | 31236  | 7.2  | S-methyl-5'-thioadenosine phosphorylase                                                                                                                                                 |
| 787              | P52943           | 17                   | 154            | 70.7                  | 208    | 22493  | 8.7  | Cysteine-rich protein 2                                                                                                                                                                 |
| 788              | Q95433           | 17                   | 75             | 69.8                  | 338    | 38274  | 5.5  | Activator of 90 kDa heat shock protein ATPase log 1                                                                                                                                     |
| 789              | Q5JQ10           | 17                   | 50             | 72.2                  | 345    | 38703  | 6.7  | Adenosine kinase                                                                                                                                                                        |
| 789              | P55263           | 17                   | 50             | 68.8                  | 362    | 40545  | 6.7  | Adenosine kinase                                                                                                                                                                        |
| 790              | Q9UBE0           | 17                   | 67             | 66.8                  | 346    | 38450  | 5.3  | SUMO-activating enzyme subunit 1                                                                                                                                                        |
| 791              | Q86UA3           | 17                   | 53             | 62.8                  | 376    | 42508  | 6.8  | Chromosome 12 open reading frame 10                                                                                                                                                     |
| 792              | Q9HB71           | 17                   | 99             | 62.7                  | 228    | 26210  | 8.2  | Calcyclin-binding protein                                                                                                                                                               |
| 793              | Q07960           | 17                   | 41             | 59.9                  | 439    | 50436  | 6.3  | Rho GTPase-activating protein 1                                                                                                                                                         |
| 794              | P00390-2         | 17                   | 41             | 61.2                  | 479    | 51701  | 7.7  | Isoform Cytoplasmic of Glutathione reductase, mitochondrial                                                                                                                             |
| 794              | C8KIL8           | 17                   | 41             | 59.4                  | 493    | 53027  | 8.8  | Glutathione reductase delta8 alternative splicing variant                                                                                                                               |
| 794              | P00390           | 17                   | 41             | 56.1                  | 522    | 56257  | 8.5  | Glutathione reductase, mitochondrial                                                                                                                                                    |
| 795              | P61246           | 17                   | 176            | 57.7                  | 260    | 29586  | 9.7  | 40S ribosomal protein S3a (Fragment)                                                                                                                                                    |
| 795              | P61247           | 17                   | 176            | 56.8                  | 260    | 29945  | 9.7  | 40S ribosomal protein S3a                                                                                                                                                               |
| 796              | Q96019           | 17                   | 31             | 57.3                  | 429    | 47461  | 5.6  | Actin-like protein 6A                                                                                                                                                                   |
| 796              | Q53FS0           | 17                   | 31             | 57.3                  | 429    | 47481  | 5.7  | Actin-like 6A isoform 1 variant (Fragment)                                                                                                                                              |
| 797              | P43034           | 17                   | 36             | 57.3                  | 410    | 46638  | 7.4  | Platelet-activating factor acetylhydrolase IB subunit alpha                                                                                                                             |
| 797              | UPI0001AE6665    | 17                   | 36             | 57.3                  | 410    | 46448  | 7.5  | Platelet-activating factor acetylhydrolase IB subunit alpha (PAF acetylhydrolase 45 kDa subunit) (PAF-AH 45 kDa subunit) (PAF-AH alpha) (PAFAH alpha) (Lissencephaly-1 protein) (LIS-1) |
| 798              | P23381           | 17                   | 41             | 55.2                  | 471    | 53165  | 6.2  | Tryptophanyl-tRNA synthetase, cytoplasmic                                                                                                                                               |
| 799              | Q9BUB1           | 17                   | 45             | 56.8                  | 382    | 43067  | 5.1  | PRKAR2A protein                                                                                                                                                                         |
| 799              | A8KAH7           | 17                   | 45             | 53.7                  | 404    | 45504  | 5.1  | cDNA FLJ75444, highly similar to sapiens protein kinase, cAMP-dependent, regulatory, type II, alpha (PRKAR2A), mRNA                                                                     |
| 799              | P13861           | 17                   | 45             | 53.7                  | 404    | 45518  | 5.1  | cAMP-dependent protein kinase type II-alpha regulatory subunit                                                                                                                          |
| 800              | A6NFN4           | 17                   | 25             | 53.4                  | 528    | 59420  | 5.2  | Uncharacterized protein                                                                                                                                                                 |
| 800              | Q13564           | 17                   | 25             | 52.8                  | 534    | 60246  | 5.4  | NEDD8-activating enzyme E1 regulatory subunit                                                                                                                                           |
| 801              | Q9ULA0           | 17                   | 34             | 55.2                  | 475    | 52428  | 7.4  | Aspartyl aminopeptidase                                                                                                                                                                 |

Table S1. Proteins identified in the OVCAR-3 tumor supernatant by two or more unique peptides.

| Protein or Protein Group | Accession Number | Unique Peptide Count | Spectrum Count | Sequence Coverage (%) | Length | MolWt  | pI  | Descriptive Name                                                                                  |
|--------------------------|------------------|----------------------|----------------|-----------------------|--------|--------|-----|---------------------------------------------------------------------------------------------------|
| 801                      | E7ETB3           | 17                   | 34             | 53.1                  | 493    | 54531  | 7.7 | Uncharacterized protein                                                                           |
| 802                      | P30566           | 17                   | 39             | 53.1                  | 484    | 54889  | 7.1 | Adenylosuccinate lyase                                                                            |
| 802                      | Q71UA4           | 17                   | 39             | 53.1                  | 484    | 54871  | 7.1 | Adenylosuccinate lyase                                                                            |
| 803                      | P37837           | 17                   | 95             | 52.5                  | 337    | 37540  | 6.8 | Transaldolase                                                                                     |
| 804                      | Q9UJU6           | 17                   | 64             | 50.2                  | 430    | 48207  | 5   | Drebrin-like protein                                                                              |
| 805                      | Q53GI5           | 17                   | 37             | 48.7                  | 423    | 48109  | 7.9 | Adaptor-related protein complex 1, mu 2 subunit variant (Fragment)                                |
| 805                      | Q9Y6Q5           | 17                   | 37             | 48.7                  | 423    | 48109  | 8.2 | AP-1 complex subunit mu-2                                                                         |
| 806                      | D6RGI3           | 17                   | 35             | 49.4                  | 425    | 49006  | 7   | Septin 11, isoform CRA_b                                                                          |
| 806                      | Q9NVA2           | 17                   | 35             | 49                    | 429    | 49398  | 6.8 | Septin-11                                                                                         |
| 806                      | D6RER5           | 17                   | 35             | 48.6                  | 432    | 49809  | 6.7 | Uncharacterized protein                                                                           |
| 806                      | Q9NVA2-2         | 17                   | 35             | 47.8                  | 439    | 50823  | 7   | Isoform 2 of Septin-11                                                                            |
| 807                      | Q00148           | 17                   | 115            | 46.1                  | 427    | 49130  | 5.7 | ATP-dependent RNA helicase DDX39A                                                                 |
| 808                      | P43490           | 17                   | 34             | 45.6                  | 491    | 55521  | 7.2 | Nicotinamide phosphoribosyltransferase                                                            |
| 809                      | B2RDD7           | 17                   | 38             | 44.6                  | 637    | 72710  | 6.3 | cDNA, FLJ96564, highly similar to sapiens SKB1 log (S. pombe) (SKB1), mRNA                        |
| 809                      | O14744           | 17                   | 38             | 44.6                  | 637    | 72684  | 6.3 | Protein arginine N-methyltransferase 5                                                            |
| 810                      | P12955           | 17                   | 39             | 44.6                  | 493    | 54548  | 6   | Xaa-Pro dipeptidase                                                                               |
| 811                      | P32455           | 17                   | 41             | 42.7                  | 592    | 67931  | 6.3 | Interferon-induced guanylate-binding protein 1                                                    |
| 812                      | Q14103-3         | 17                   | 320            | 48                    | 306    | 32835  | 8.2 | Isoform 3 of Heterogeneous nuclear ribonucleoprotein D0                                           |
| 812                      | Q14103           | 17                   | 320            | 41.4                  | 355    | 38434  | 7.8 | Heterogeneous nuclear ribonucleoprotein D0                                                        |
| 813                      | Q9HC38-2         | 17                   | 34             | 68.8                  | 298    | 33233  | 5.6 | Isoform 2 of Glyoxalase domain-containing protein 4                                               |
| 813                      | E7EMY5           | 17                   | 34             | 40.9                  | 501    | 54690  | 8.7 | Uncharacterized protein                                                                           |
| 813                      | Q9Y3E8           | 17                   | 34             | 40.7                  | 504    | 55012  | 8.7 | Uncharacterized protein C17orf25                                                                  |
| 814                      | Q8TAT6           | 17                   | 69             | 39.8                  | 608    | 68120  | 6.4 | Nuclear protein localization protein 4 log                                                        |
| 814                      | E7EVD8           | 17                   | 69             | 39.3                  | 616    | 69360  | 6.7 | Uncharacterized protein                                                                           |
| 814                      | Q8TAT6-2         | 17                   | 69             | 39.2                  | 617    | 69461  | 6.7 | Isoform 2 of Nuclear protein localization protein 4 log                                           |
| 815                      | B4E3E8           | 17                   | 90             | 33.9                  | 646    | 71355  | 6.6 | DDX3X (EC 3.6.1.-)                                                                                |
| 815                      | UPI000013ED8C    | 17                   | 90             | 33.1                  | 661    | 73156  | 7.2 | ATP-dependent RNA helicase DDX3X isoform 2                                                        |
| 815                      | O00571           | 17                   | 90             | 33.1                  | 662    | 73244  | 7.2 | ATP-dependent RNA helicase DDX3X                                                                  |
| 815                      | B5BTY4           | 17                   | 90             | 33.1                  | 662    | 73172  | 7.4 | ATP-dependent RNA helicase DDX3X                                                                  |
| 816                      | Q14134-2         | 17                   | 90             | 33.9                  | 570    | 63844  | 7   | Isoform Beta of Tripartite motif-containing protein 29                                            |
| 816                      | Q14134           | 17                   | 90             | 32.8                  | 588    | 65835  | 7.1 | Tripartite motif-containing protein 29                                                            |
| 816                      | Q53G41           | 17                   | 90             | 32.8                  | 588    | 65817  | 7   | Tripartite motif protein TRIM29 isoform alpha variant (Fragment)                                  |
| 817                      | Q8IV36-2         | 17                   | 32             | 29.9                  | 787    | 88616  | 6.1 | Isoform 2 of UPF0663 transmembrane protein C17orf28                                               |
| 817                      | Q8IV36           | 17                   | 32             | 29.8                  | 788    | 88745  | 6.1 | UPF0663 transmembrane protein C17orf28                                                            |
| 818                      | P52888           | 17                   | 39             | 28.6                  | 689    | 78840  | 6   | Thimet oligopeptidase                                                                             |
| 818                      | Q96CV8           | 17                   | 39             | 28.6                  | 689    | 78824  | 6   | Thimet oligopeptidase 1                                                                           |
| 819                      | A8K6F7           | 17                   | 62             | 27.2                  | 929    | 101675 | 6.1 | Unc-45 log A (C. elegans), isoform CRA_a                                                          |
| 819                      | Q9H3U1           | 17                   | 62             | 26.8                  | 944    | 103077 | 6.1 | Protein unc-45 log A                                                                              |
| 820                      | Q8TD19           | 17                   | 26             | 25.7                  | 979    | 107168 | 5.7 | Serine/threonine-protein kinase Nek9                                                              |
| 821                      | Q9BXP5-5         | 17                   | 78             | 25.5                  | 839    | 96223  | 5.8 | Isoform 5 of Serrate RNA effector molecule log                                                    |
| 821                      | Q9BXP5-4         | 17                   | 78             | 24.6                  | 871    | 100147 | 6   | Isoform 4 of Serrate RNA effector molecule log                                                    |
| 821                      | Q9BXP5-3         | 17                   | 78             | 24.5                  | 875    | 100537 | 6   | Isoform 3 of Serrate RNA effector molecule log                                                    |
| 821                      | Q9BXP5-2         | 17                   | 78             | 24.5                  | 872    | 100276 | 6   | Isoform 2 of Serrate RNA effector molecule log                                                    |
| 821                      | Q9BXP5           | 17                   | 78             | 24.4                  | 876    | 100667 | 6   | Serrate RNA effector molecule log                                                                 |
| 822                      | Q13620-1         | 17                   | 44             | 23.7                  | 905    | 102299 | 7.9 | Isoform 2 of Cullin-4B                                                                            |
| 822                      | E0CX08           | 17                   | 44             | 23.6                  | 900    | 102756 | 8   | Cullin 4B, isoform CRA_e                                                                          |
| 822                      | Q13620           | 17                   | 44             | 23.2                  | 913    | 103982 | 7.4 | Cullin-4B                                                                                         |
| 823                      | Q9UKU6           | 17                   | 30             | 21.3                  | 1024   | 116999 | 7   | Thyrotropin-releasing hormone-degrading ectoenzyme                                                |
| 824                      | B2R8Y6           | 17                   | 47             | 21.8                  | 1162   | 134062 | 5.3 | cDNA, FLJ94121, highly similar to sapiens stromal antigen 2 (STAG2), mRNA                         |
| 824                      | Q8N3U4           | 17                   | 47             | 20.6                  | 1231   | 141326 | 5.4 | Cohesin subunit SA-2                                                                              |
| 824                      | Q6MZM3           | 17                   | 47             | 20.6                  | 1231   | 141301 | 5.4 | Putative uncharacterized protein DKFZp686C21148                                                   |
| 824                      | B1AMT5           | 17                   | 47             | 20                    | 1268   | 145751 | 5.5 | Stromal antigen 2                                                                                 |
| 824                      | Q6MZP3           | 17                   | 47             | 20                    | 1268   | 145675 | 5.5 | Putative uncharacterized protein DKFZp686I05169                                                   |
| 824                      | Q68DE9           | 17                   | 47             | 20                    | 1268   | 145781 | 5.5 | Putative uncharacterized protein DKFZp781H1753                                                    |
| 825                      | D3DSM4           | 17                   | 69             | 17.7                  | 1336   | 135510 | 6.5 | Collagen, type XVIII, alpha 1, isoform CRA_d                                                      |
| 825                      | P39060-2         | 17                   | 69             | 17.7                  | 1339   | 135761 | 6.5 | Isoform 3 of Collagen alpha-1(XVIII) chain                                                        |
| 825                      | P39060-1         | 17                   | 69             | 15.6                  | 1519   | 154018 | 5.7 | Isoform 2 of Collagen alpha-1(XVIII) chain                                                        |
| 825                      | D3DSM5           | 17                   | 69             | 15.6                  | 1516   | 153767 | 5.7 | Collagen, type XVIII, alpha 1, isoform CRA_b                                                      |
| 825                      | UPI00018147FD    | 17                   | 69             | 13.5                  | 1751   | 177935 | 6   | collagen alpha-1(XVIII) chain isoform 3 precursor                                                 |
| 825                      | P39060           | 17                   | 69             | 13.5                  | 1754   | 178187 | 6   | Collagen alpha-1(XVIII) chain                                                                     |
| 826                      | D3DX70           | 17                   | 24             | 13.3                  | 1583   | 184657 | 5.1 | GRIP and coiled-coil domain containing 2, isoform CRA_a                                           |
| 826                      | UPI00015E0A4F    | 17                   | 24             | 13.3                  | 1583   | 184653 | 5.1 | Ran-binding protein 2-like 4 (RanBP2L4).                                                          |
| 826                      | Q8IWIJ2          | 17                   | 24             | 12.5                  | 1684   | 195908 | 5.1 | GRIP and coiled-coil domain-containing protein 2                                                  |
| 827                      | E1P559           | 17                   | 30             | 11.8                  | 1816   | 201823 | 6.3 | Laminin, alpha 4, isoform CRA_b                                                                   |
| 827                      | Q5D044           | 17                   | 30             | 11.8                  | 1816   | 201882 | 6.3 | LAMA4 protein                                                                                     |
| 828                      | P61106           | 16                   | 222            | 85.1                  | 215    | 23897  | 6.2 | Ras-related protein Rab-14 Ras-related protein Rab-14                                             |
| 829                      | P51149           | 16                   | 356            | 77.3                  | 207    | 23490  | 6.7 | Ras-related protein Rab-7a Ras-related protein Rab-7a                                             |
| 830                      | P32233           | 16                   | 30             | 59.4                  | 367    | 40512  | 8.9 | Developmentally-regulated GTP-binding protein 1                                                   |
| 830                      | Q9Y295           | 16                   | 30             | 59.4                  | 367    | 40542  | 8.9 | Developmentally-regulated GTP-binding protein 1                                                   |
| 831                      | P61160           | 16                   | 82             | 53.6                  | 394    | 44761  | 6.7 | Actin-related protein 2 Actin-related protein 2                                                   |
| 832                      | Q06138           | 16                   | 30             | 49.9                  | 341    | 39842  | 7.2 | Calcium-binding protein 39                                                                        |
| 832                      | Q9Y376           | 16                   | 30             | 49.9                  | 341    | 39869  | 6.9 | Calcium-binding protein 39                                                                        |
| 832                      | Q8VDZ8           | 16                   | 30             | 49.9                  | 341    | 39843  | 6.9 | Cab39 protein                                                                                     |
| 833                      | Q5T7C4           | 16                   | 99             | 65.8                  | 158    | 18311  | 9.7 | High-mobility group box 1 High-mobility group box 1                                               |
| 833                      | Q59GW1           | 16                   | 99             | 59.1                  | 176    | 20164  | 9.7 | High-mobility group box 1 variant (Fragment)                                                      |
| 833                      | Q8BNM0           | 16                   | 99             | 57.5                  | 181    | 20648  | 9.8 | Putative uncharacterized protein (Fragment)                                                       |
| 833                      | UPI0000608CF59   | 16                   | 99             | 48.8                  | 213    | 24606  | 6.8 | PREDICTED: high mobility group protein B1-like                                                    |
| 833                      | P09429           | 16                   | 99             | 48.4                  | 215    | 24894  | 5.7 | High mobility group protein B1                                                                    |
| 833                      | Q497Z6           | 16                   | 99             | 48.4                  | 215    | 24908  | 5.7 | High mobility group box 1                                                                         |
| 833                      | P63158           | 16                   | 99             | 48.4                  | 215    | 24894  | 5.7 | High mobility group protein B1                                                                    |
| 834                      | Q3TWW4           | 16                   | 25             | 45.5                  | 433    | 49389  | 9.5 | Adaptor protein complex AP-2, mu1, isoform CRA_a Adaptor protein complex AP-2, mu1, isoform CRA_a |
| 834                      | Q96CW1           | 16                   | 25             | 45.3                  | 435    | 49655  | 9.5 | AP-2 complex subunit mu AP-2 complex subunit mu                                                   |
| 834                      | Q3TH69           | 16                   | 25             | 45.3                  | 435    | 49727  | 9.5 | Putative uncharacterized protein                                                                  |
| 834                      | B4DNB9           | 16                   | 25             | 42.8                  | 460    | 52338  | 9.5 | cDNA FLJ53069, highly similar to AP-2 complex subunit mu-1                                        |
| 834                      | E9PFW3           | 16                   | 25             | 42.8                  | 460    | 52304  | 9.5 | Uncharacterized protein                                                                           |
| 835                      | Q6P1J9           | 16                   | 61             | 37.1                  | 531    | 60577  | 9.6 | Parafibromin Parafibromin                                                                         |
| 836                      | A1A563           | 16                   | 29             | 22.8                  | 860    | 97304  | 9.2 | Eukaryotic translation initiation factor 2C, 2                                                    |
| 836                      | Q9UKV8           | 16                   | 29             | 22.8                  | 859    | 97208  | 9.2 | Protein argonaute-2                                                                               |
| 836                      | Q8CJG0           | 16                   | 29             | 22.8                  | 860    | 97323  | 9.2 | Protein argonaute-2                                                                               |
| 837                      | B2R8Y4           | 16                   | 344            | 16.2                  | 901    | 103252 | 5.6 | cDNA, FLJ94117, highly similar to sapiens actinin, alpha 3 (ACTN3), mRNA                          |
| 837                      | Q08043           | 16                   | 344            | 16.2                  | 901    | 103241 | 5.5 | Alpha-actinin-3                                                                                   |
| 837                      | Q88990           | 16                   | 344            | 16.2                  | 900    | 103043 | 5.4 | Alpha-actinin-3                                                                                   |
| 838                      | P68254           | 16                   | 138            | 86.1                  | 245    | 27778  | 4.8 | 14-3-3 protein theta                                                                              |
| 839                      | Q9WVA4           | 16                   | 368            | 81.4                  | 199    | 22395  | 8.2 | Transgelin-2                                                                                      |
| 840                      | D320Y2           | 16                   | 102            | 74.5                  | 200    | 22494  | 8.9 | Uncharacterized protein                                                                           |
| 841                      | Q91VH6           | 16                   | 34             | 73.7                  | 297    | 33692  | 7.2 | Protein MEMO1                                                                                     |
| 842                      | UPI0000473750    | 16                   | 79             | 72.7                  | 231    | 26159  | 5.2 | proteasome activator complex subunit 2 isoform 2                                                  |
| 842                      | P97372           | 16                   | 79             | 70.3                  | 239    | 27057  | 5.7 | Proteasome activator complex subunit 2                                                            |



Table S1. Proteins identified in the OVCAR-3 tumor supernatant by two or more unique peptides.

| Protein or Protein Group | Accession Number | Unique Peptide Count | Spectrum Count | Sequence Coverage (%) | Length | MolWt  | pI  | Descriptive Name                                                                                        |
|--------------------------|------------------|----------------------|----------------|-----------------------|--------|--------|-----|---------------------------------------------------------------------------------------------------------|
| 843                      | P62908           | 16                   | 86             | 68.3                  | 243    | 26674  | 9.7 | 40S ribosomal protein S3                                                                                |
| 844                      | Q9QYB1           | 16                   | 66             | 67.6                  | 253    | 28729  | 5.6 | Chloride intracellular channel protein 4                                                                |
| 845                      | Q64010           | 16                   | 56             | 61.2                  | 304    | 33815  | 5.6 | Adapter molecule crk                                                                                    |
| 846                      | Q8BTX5           | 16                   | 34             | 60.2                  | 352    | 39846  | 6.7 | Putative uncharacterized protein                                                                        |
| 846                      | Q91WK2           | 16                   | 34             | 60.2                  | 352    | 39832  | 6.7 | Eukaryotic translation initiation factor 3 subunit H                                                    |
| 847                      | P97371           | 16                   | 115            | 57.8                  | 249    | 28673  | 6   | Proteasome activator complex subunit 1                                                                  |
| 848                      | Q3T9L0           | 16                   | 112            | 45.2                  | 427    | 49085  | 5.7 | Putative uncharacterized protein                                                                        |
| 848                      | Q8VDW0           | 16                   | 112            | 45.2                  | 427    | 49067  | 5.7 | ATP-dependent RNA helicase DDX39A                                                                       |
| 848                      | Q3UVN0           | 16                   | 112            | 45.2                  | 427    | 49083  | 5.7 | Putative uncharacterized protein                                                                        |
| 849                      | P06745           | 16                   | 43             | 41.2                  | 558    | 62767  | 8.1 | Glucose-6-phosphate isomerase                                                                           |
| 850                      | Q3UXJ2           | 16                   | 40             | 35.9                  | 651    | 70913  | 7   | Putative uncharacterized protein                                                                        |
| 850                      | A1L354           | 16                   | 40             | 34.3                  | 683    | 74615  | 7.1 | Transforming growth factor, beta induced                                                                |
| 850                      | P82198           | 16                   | 40             | 34.3                  | 683    | 74597  | 7.1 | Transforming growth factor-beta-induced protein ig-h3                                                   |
| 851                      | UPI0001889CC6    | 16                   | 106            | 25.5                  | 552    | 61392  | 7.4 | UPI0001889CC6 UniRef100 entry                                                                           |
| 852                      | P09405           | 16                   | 161            | 24.3                  | 707    | 76723  | 4.8 | Nucleolin                                                                                               |
| 852                      | Q8CD23           | 16                   | 161            | 24.3                  | 707    | 76866  | 4.8 | Putative uncharacterized protein                                                                        |
| 852                      | Q3TL52           | 16                   | 161            | 24.3                  | 707    | 76751  | 4.8 | Putative uncharacterized protein                                                                        |
| 853                      | Q04857           | 16                   | 58             | 23.3                  | 1025   | 108489 | 5.4 | Collagen alpha-1(VI) chain                                                                              |
| 854                      | Q8TDQ7           | 16                   | 71             | 85.5                  | 276    | 31085  | 7   | Glucosamine-6-phosphate isomerase 2                                                                     |
| 855                      | P04792           | 16                   | 174            | 84.9                  | 205    | 22783  | 6.4 | Heat shock protein beta-1                                                                               |
| 856                      | P37802           | 16                   | 458            | 84.4                  | 199    | 22391  | 8.2 | Transgelin-2                                                                                            |
| 857                      | Q14232           | 16                   | 38             | 78.4                  | 305    | 33712  | 7.3 | Translation initiation factor eIF-2B subunit alpha                                                      |
| 858                      | A8K237           | 16                   | 36             | 77.9                  | 276    | 31491  | 8.1 | cDNA FLJ75913, highly similar to sapiens cytochrome b5 reductase 2 (CYB5R2), transcript variant 1, mRNA |
| 859                      | Q13630           | 16                   | 47             | 77.9                  | 321    | 35893  | 6.6 | GDP-L-fucose synthase                                                                                   |
| 860                      | Q9Y316           | 16                   | 34             | 76.8                  | 297    | 33733  | 7.2 | Protein MEMO1                                                                                           |
| 861                      | Q9NQR4           | 16                   | 54             | 72.1                  | 276    | 30608  | 7.2 | Omega-amidase NIT2                                                                                      |
| 862                      | P06493           | 16                   | 50             | 71.7                  | 297    | 34081  | 8.4 | Cyclin-dependent kinase 1                                                                               |
| 863                      | Q15257           | 16                   | 57             | 69.8                  | 358    | 40668  | 5.9 | Serine/threonine-protein phosphatase 2A activator                                                       |
| 864                      | Q00796           | 16                   | 56             | 68.9                  | 357    | 38325  | 8   | Sorbitol dehydrogenase                                                                                  |
| 865                      | P23396           | 16                   | 89             | 68.3                  | 243    | 26688  | 9.7 | 40S ribosomal protein S3                                                                                |
| 866                      | P48739           | 16                   | 48             | 68.6                  | 271    | 31540  | 6.9 | Phosphatidylinositol transfer protein beta isoform                                                      |
| 866                      | B7Z7Q0           | 16                   | 48             | 68.1                  | 273    | 31700  | 6.7 | Phosphatidylinositol transfer protein, beta, isoform CRA_a                                              |
| 867                      | P21266           | 16                   | 36             | 68                    | 225    | 26560  | 5.5 | Glutathione S-transferase Mu 3                                                                          |
| 868                      | P30041           | 16                   | 369            | 67.4                  | 224    | 25035  | 6.4 | Peroxiredoxin-6                                                                                         |
| 869                      | Q15417           | 16                   | 174            | 63.8                  | 329    | 36414  | 6.1 | Calponin-3                                                                                              |
| 870                      | P67809           | 16                   | 149            | 63.3                  | 324    | 35924  | 9.9 | Nuclease-sensitive element-binding protein 1                                                            |
| 871                      | P40925           | 16                   | 60             | 62.3                  | 334    | 36426  | 7.3 | Malate dehydrogenase, cytoplasmic                                                                       |
| 871                      | UPI0001E92A3D    | 16                   | 60             | 59.1                  | 352    | 38628  | 7.7 | malate dehydrogenase, cytoplasmic isoform 1                                                             |
| 872                      | P46108           | 16                   | 57             | 61.2                  | 304    | 33831  | 5.6 | Adapter molecule crk                                                                                    |
| 873                      | Q9H2U2           | 16                   | 60             | 60.5                  | 334    | 37920  | 7.4 | Inorganic pyrophosphatase 2, mitochondrial                                                              |
| 873                      | Q9H2U2-2         | 16                   | 60             | 57.9                  | 349    | 39638  | 6.9 | Isoform 2 of Inorganic pyrophosphatase 2, mitochondrial                                                 |
| 874                      | P12277           | 16                   | 55             | 60.4                  | 381    | 42644  | 5.6 | Creatine kinase B-type                                                                                  |
| 875                      | O15372           | 16                   | 50             | 60.2                  | 352    | 39930  | 6.5 | Eukaryotic translation initiation factor 3 subunit H                                                    |
| 875                      | Q53HR0           | 16                   | 50             | 60.2                  | 352    | 39914  | 6.5 | Eukaryotic translation initiation factor 3, subunit 3 gamma, 40kDa variant (Fragment)                   |
| 876                      | UPI0001B1A4B8    | 16                   | 76             | 60                    | 422    | 45804  | 5.4 | perilipin-3 isoform 3                                                                                   |
| 877                      | Q02750           | 16                   | 33             | 59.8                  | 393    | 43439  | 6.6 | Dual specificity mitogen-activated protein kinase kinase 1                                              |
| 878                      | P34949           | 16                   | 32             | 57.9                  | 423    | 46656  | 6   | Mannose-6-phosphate isomerase                                                                           |
| 879                      | O75436           | 16                   | 32             | 57.2                  | 327    | 38170  | 6.5 | Vacuolar protein sorting-associated protein 26A                                                         |
| 880                      | Q13561           | 16                   | 44             | 57.9                  | 401    | 44231  | 5.2 | Dynactin subunit 2                                                                                      |
| 880                      | Q13561-3         | 16                   | 44             | 57.6                  | 403    | 44473  | 5.2 | Isoform 3 of Dynactin subunit 2                                                                         |
| 880                      | B2RBK5           | 16                   | 44             | 57.1                  | 406    | 44820  | 5.2 | cDNA, FLJ95559, sapiens dynactin 2 (p50) (DCTN2), mRNA                                                  |
| 881                      | P12429           | 16                   | 56             | 56                    | 323    | 36375  | 5.9 | Annexin A3                                                                                              |
| 882                      | P39748           | 16                   | 58             | 55                    | 380    | 42593  | 8.6 | Flap endonuclease 1                                                                                     |
| 883                      | P27707           | 16                   | 42             | 54.2                  | 260    | 30519  | 5.2 | Deoxycytidine kinase                                                                                    |
| 884                      | O15264           | 16                   | 19             | 53.7                  | 365    | 42090  | 8.4 | Mitogen-activated protein kinase 13                                                                     |
| 885                      | P39687           | 16                   | 105            | 52.6                  | 249    | 28585  | 4.1 | Acidic leucine-rich nuclear phosphoprotein 32 family member A                                           |
| 886                      | P26599           | 16                   | 227            | 51.4                  | 531    | 57221  | 9.2 | Polypyrimidine tract-binding protein 1                                                                  |
| 886                      | P26599-2         | 16                   | 227            | 49.6                  | 550    | 59037  | 9.2 | Isoform 2 of Polypyrimidine tract-binding protein 1                                                     |
| 886                      | Q9BUQ0           | 16                   | 227            | 49                    | 557    | 59633  | 9.2 | Polypyrimidine tract binding protein 1                                                                  |
| 887                      | Q9BZK7           | 16                   | 50             | 47.5                  | 514    | 55595  | 5.6 | F-box-like/WD repeat-containing protein TBL1XR1                                                         |
| 888                      | P54727           | 16                   | 50             | 47.2                  | 409    | 43171  | 4.8 | UV excision repair protein RAD23 log B                                                                  |
| 889                      | P30520           | 16                   | 42             | 46.5                  | 456    | 50097  | 6.6 | Adenylosuccinate synthetase isozyme 2                                                                   |
| 890                      | A1JUI8           | 16                   | 36             | 45.5                  | 488    | 53681  | 6.1 | Chaperonin subunit 6A (Fragment)                                                                        |
| 891                      | Q9BR76           | 16                   | 40             | 44.6                  | 489    | 54235  | 5.9 | Coronin-1B                                                                                              |
| 892                      | P55010           | 16                   | 42             | 44.5                  | 431    | 49223  | 5.6 | Eukaryotic translation initiation factor 5                                                              |
| 893                      | P04040           | 16                   | 21             | 43.8                  | 527    | 59756  | 7.4 | Catalase                                                                                                |
| 894                      | P49189           | 16                   | 24             | 43.5                  | 494    | 53802  | 5.9 | 4-trimethylaminobutylaldehyde dehydrogenase                                                             |
| 894                      | B9EKV4           | 16                   | 24             | 41.5                  | 518    | 56292  | 6.6 | Aldehyde dehydrogenase 9 family, member A1                                                              |
| 895                      | A8K525           | 16                   | 201            | 41.2                  | 471    | 54288  | 9.2 | cDNA FLJ76817, highly similar to sapiens non-POU domain containing, octamer-binding (NONO), mRNA        |
| 895                      | Q15233           | 16                   | 201            | 41.2                  | 471    | 54232  | 8.9 | Non-POU domain-containing octamer-binding protein                                                       |
| 896                      | B3KML1           | 16                   | 56             | 41                    | 519    | 58472  | 5.1 | cDNA FLJ11308 fis, clone PLACE1010074, highly similar to Sorting nexin-2                                |
| 896                      | O60749           | 16                   | 56             | 41                    | 519    | 58471  | 5.1 | Sorting nexin-2                                                                                         |
| 897                      | B3KT11           | 16                   | 18             | 41                    | 503    | 57593  | 7.1 | cDNA FLJ37430 fis, clone BRAWH2001679, highly similar to sapiens NMD3 log (NMD3), mRNA                  |
| 897                      | Q96D46           | 16                   | 18             | 41                    | 503    | 57603  | 7.1 | 60S ribosomal export protein NMD3                                                                       |
| 898                      | P35611-2         | 16                   | 34             | 40.9                  | 631    | 69985  | 6.4 | Isoform 2 of Alpha-adducin                                                                              |
| 898                      | E7EV99           | 16                   | 34             | 40.8                  | 632    | 70056  | 6.4 | Uncharacterized protein                                                                                 |
| 898                      | A2A3N8           | 16                   | 34             | 39                    | 662    | 73333  | 6.5 | Adducin 1 (Alpha)                                                                                       |
| 898                      | E7ENY0           | 16                   | 34             | 38.9                  | 663    | 73404  | 6.5 | Uncharacterized protein                                                                                 |
| 898                      | P35611           | 16                   | 34             | 35                    | 737    | 80955  | 5.8 | Alpha-adducin                                                                                           |
| 898                      | P35611-3         | 16                   | 34             | 33.6                  | 768    | 84303  | 6   | Isoform 3 of Alpha-adducin                                                                              |
| 899                      | Q15833-2         | 16                   | 32             | 39                    | 590    | 66138  | 6.5 | Isoform 2 of Syntaxin-binding protein 2                                                                 |
| 899                      | Q53GF4           | 16                   | 32             | 38.8                  | 593    | 66367  | 6.6 | Syntaxin binding protein 2 variant (Fragment)                                                           |
| 899                      | Q15833           | 16                   | 32             | 38.8                  | 593    | 66453  | 6.5 | Syntaxin-binding protein 2                                                                              |
| 899                      | E7EQD5           | 16                   | 32             | 38.1                  | 604    | 67695  | 6.7 | Uncharacterized protein                                                                                 |
| 900                      | Q8NBF2           | 16                   | 30             | 37.5                  | 726    | 79444  | 5.6 | NHL repeat-containing protein 2                                                                         |
| 901                      | P10155           | 16                   | 30             | 36.6                  | 538    | 60671  | 8   | 60 kDa SS-A/Ro ribonucleoprotein                                                                        |
| 902                      | Q14258           | 16                   | 69             | 35.7                  | 630    | 70974  | 8.1 | E3 ubiquitin/ISG15 ligase TRIM25                                                                        |
| 903                      | Q96G03           | 16                   | 49             | 35.1                  | 612    | 68283  | 6.7 | Phosphoglucomutase-2                                                                                    |
| 904                      | P40222           | 16                   | 21             | 35                    | 546    | 61891  | 6.5 | Alpha-taxilin                                                                                           |
| 905                      | UPI00015DFEB1    | 16                   | 39             | 34.9                  | 648    | 73424  | 8   | ATP-dependent DNA helicase Q1 (EC 3.6.1.-) (DNA-dependent ATPase Q1)                                    |
| 905                      | P46063           | 16                   | 39             | 34.8                  | 649    | 73457  | 7.9 | ATP-dependent DNA helicase Q1                                                                           |
| 906                      | P46060           | 16                   | 41             | 34.4                  | 587    | 63542  | 4.7 | Ran GTPase-activating protein 1                                                                         |
| 907                      | B3GQS7           | 16                   | 41             | 32.7                  | 569    | 60680  | 6   | Mitochondrial heat shock 60kD protein 1 variant 1                                                       |
| 907                      | P10809           | 16                   | 41             | 32.5                  | 573    | 61055  | 5.9 | 60 kDa heat shock protein, mitochondrial                                                                |
| 908                      | Q96AC1           | 16                   | 26             | 32.9                  | 680    | 77861  | 6.7 | Fermitin family log 2                                                                                   |
| 908                      | B5TJY2           | 16                   | 26             | 32.6                  | 687    | 78676  | 6.7 | KINDLIN2 isoform 2                                                                                      |
| 909                      | Q9BR63           | 16                   | 34             | 30.3                  | 585    | 65701  | 6.8 | FARSB protein (Fragment)                                                                                |
| 909                      | Q9NSD9           | 16                   | 34             | 30.1                  | 589    | 66116  | 6.8 | Phenylalanyl-tRNA synthetase beta chain                                                                 |

Table S1. Proteins identified in the OVCAR-3 tumor supernatant by two or more unique peptides.

| Protein or Protein Group | Accession Number | Unique Peptide Count | Spectrum Count | Sequence Coverage (%) | Length | MolWt  | pI  | Descriptive Name                                                                                                                                                                                                                                                |
|--------------------------|------------------|----------------------|----------------|-----------------------|--------|--------|-----|-----------------------------------------------------------------------------------------------------------------------------------------------------------------------------------------------------------------------------------------------------------------|
| 910                      | Q14764           | 16                   | 27             | 29.9                  | 893    | 93327  | 5.5 | Major vault protein                                                                                                                                                                                                                                             |
| 911                      | Q32MZ4-3         | 16                   | 21             | 28.3                  | 752    | 82689  | 4.6 | Isoform 3 of Leucine-rich repeat flightless-interacting protein 1                                                                                                                                                                                               |
| 911                      | Q32MZ4-2         | 16                   | 21             | 27.2                  | 784    | 86404  | 4.7 | Isoform 2 of Leucine-rich repeat flightless-interacting protein 1                                                                                                                                                                                               |
| 911                      | Q32MZ4           | 16                   | 21             | 26.4                  | 808    | 89253  | 4.7 | Leucine-rich repeat flightless-interacting protein 1                                                                                                                                                                                                            |
| 912                      | P13591-4         | 16                   | 61             | 29.3                  | 726    | 80312  | 4.9 | Isoform 4 of Neural cell adhesion molecule 1                                                                                                                                                                                                                    |
| 912                      | P13591-1         | 16                   | 61             | 25.1                  | 848    | 93361  | 4.9 | Isoform 2 of Neural cell adhesion molecule 1                                                                                                                                                                                                                    |
| 913                      | A0AV37           | 16                   | 25             | 24.9                  | 837    | 92756  | 9.3 | Plakophilin 2                                                                                                                                                                                                                                                   |
| 913                      | Q99959           | 16                   | 25             | 23.6                  | 881    | 97415  | 9.3 | Plakophilin-2                                                                                                                                                                                                                                                   |
| 913                      | B8QGS6           | 16                   | 25             | 23.6                  | 881    | 97401  | 9.3 | Plakophilin-2                                                                                                                                                                                                                                                   |
| 913                      | B8QFA1           | 16                   | 25             | 23.6                  | 881    | 97388  | 9.3 | Plakophilin-2 transcript variant 2b                                                                                                                                                                                                                             |
| 914                      | UPI00004120FF    | 16                   | 18             | 24.6                  | 1053   | 112966 | 6.3 | serine/threonine-protein phosphatase 6 regulatory ankyrin repeat subunit A isoform a                                                                                                                                                                            |
| 915                      | UPI0000470C59    | 16                   | 30             | 22                    | 1077   | 113456 | 5.7 | large proline-rich protein BAT3 isoform d                                                                                                                                                                                                                       |
| 915                      | B0LX83           | 16                   | 30             | 21                    | 1126   | 118703 | 5.6 | HLA-B associated transcript 3                                                                                                                                                                                                                                   |
| 915                      | P46379-2         | 16                   | 30             | 21                    | 1126   | 118693 | 5.6 | Isoform 2 of Large proline-rich protein BAG6                                                                                                                                                                                                                    |
| 915                      | P46379           | 16                   | 30             | 20.9                  | 1132   | 119409 | 5.6 | Large proline-rich protein BAG6                                                                                                                                                                                                                                 |
| 915                      | UPI0000EE4D04    | 16                   | 30             | 20.4                  | 1162   | 122352 | 5.7 | UPI0000EE4D04 UniRef100 entry                                                                                                                                                                                                                                   |
| 915                      | P46379-3         | 16                   | 30             | 20.4                  | 1162   | 122342 | 5.7 | Isoform 3 of Large proline-rich protein BAG6                                                                                                                                                                                                                    |
| 916                      | B2RAH5           | 16                   | 91             | 19.4                  | 1030   | 115329 | 5.4 | cDNA, FLJ94919, highly similar to sapiens protein phosphatase 1, regulatory (inhibitor) subunit 12A (PPP1R12A), mRNA                                                                                                                                            |
| 916                      | Q14974           | 16                   | 91             | 19.4                  | 1030   | 115281 | 5.4 | Protein phosphatase 1 regulatory subunit 12A                                                                                                                                                                                                                    |
| 917                      | Q9BQS8           | 16                   | 29             | 14.4                  | 1478   | 166982 | 4.9 | FYVE and coiled-coil domain-containing protein 1                                                                                                                                                                                                                |
| 917                      | B7ZKT7           | 16                   | 29             | 14.2                  | 1498   | 168887 | 4.9 | Putative uncharacterized protein                                                                                                                                                                                                                                |
| 918                      | B6ZDQ0           | 16                   | 25             | 13.4                  | 1880   | 211307 | 6.1 | Uncharacterized protein                                                                                                                                                                                                                                         |
| 918                      | Q6YHU6           | 16                   | 25             | 12.9                  | 1953   | 219605 | 6.1 | Thyroid adenoma-associated protein                                                                                                                                                                                                                              |
| 918                      | C9JER1           | 16                   | 25             | 12.8                  | 1954   | 219734 | 6.1 | Uncharacterized protein                                                                                                                                                                                                                                         |
| 919                      | Q8N3C0           | 16                   | 36             | 13.2                  | 2202   | 251458 | 7.1 | Activating signal cointegrator 1 complex subunit 3                                                                                                                                                                                                              |
| 920                      | C9JK41           | 16                   | 28             | 12.5                  | 1812   | 201249 | 5.8 | Uncharacterized protein                                                                                                                                                                                                                                         |
| 920                      | UPI00015E02B1    | 16                   | 28             | 12.4                  | 1826   | 202901 | 5.9 | Kinesin-like protein KIF13B (Kinesin-like protein GAKIN).                                                                                                                                                                                                       |
| 921                      | B1A8Z4           | 16                   | 37             | 12.3                  | 1613   | 181260 | 8   | SMARCA4 isoform 3                                                                                                                                                                                                                                               |
| 921                      | B1A8Z7           | 16                   | 37             | 12.3                  | 1614   | 181347 | 8   | SMARCA4 isoform 1                                                                                                                                                                                                                                               |
| 921                      | B1A8Z6           | 16                   | 37             | 12.3                  | 1616   | 181602 | 8.1 | SMARCA4 isoform 4                                                                                                                                                                                                                                               |
| 921                      | B1A8Z5           | 16                   | 37             | 12.3                  | 1617   | 181689 | 8.1 | SMARCA4 isoform 2                                                                                                                                                                                                                                               |
| 921                      | P51532           | 16                   | 37             | 12.1                  | 1647   | 184644 | 7.9 | Transcription activator BRG1                                                                                                                                                                                                                                    |
| 921                      | Q9HBD4           | 16                   | 37             | 11.9                  | 1679   | 188147 | 8.2 | SMARCA4 isoform 2                                                                                                                                                                                                                                               |
| 921                      | B9EGQ8           | 16                   | 37             | 11.8                  | 1681   | 189447 | 8.2 | SMARCA4 protein                                                                                                                                                                                                                                                 |
| 922                      | Q99996           | 16                   | 24             | 4.7                   | 3911   | 453670 | 5   | A-kinase anchor protein 9                                                                                                                                                                                                                                       |
| 922                      | UPI0001AE70FE    | 16                   | 24             | 4.7                   | 3861   | 447766 | 5   | UPI0001AE70FE UniRef100 entry                                                                                                                                                                                                                                   |
| 922                      | UPI00003674DA    | 16                   | 24             | 4.7                   | 3842   | 446011 | 5   | A-kinase anchor protein 9 (Protein kinase A-anchoring protein 9) (PRKA9) (A-kinase anchor protein 450 kDa) (AKAP 450) (A-kinase anchor protein 350 kDa) (AKAP 350) (hgAKAP 350) (AKAP 120-like protein) (Protein hyperion) (Protein yotiao) (Centrosome- and Go |
| 922                      | UPI000013D66F    | 16                   | 24             | 4.7                   | 3896   | 451926 | 5   | A-kinase anchor protein 9 (Protein kinase A-anchoring protein 9) (PRKA9) (A-kinase anchor protein 450 kDa) (AKAP 450) (A-kinase anchor protein 350 kDa) (AKAP 350) (hgAKAP 350) (AKAP 120-like protein) (Protein hyperion) (Protein yotiao) (Centrosome- and Go |
| 922                      | Q99996-5         | 16                   | 24             | 4.7                   | 3857   | 447755 | 5   | Isoform 5 of A-kinase anchor protein 9                                                                                                                                                                                                                          |
| 922                      | Q99996-3         | 16                   | 24             | 4.7                   | 3899   | 452113 | 5   | Isoform 3 of A-kinase anchor protein 9                                                                                                                                                                                                                          |
| 922                      | Q99996-2         | 16                   | 24             | 4.7                   | 3907   | 452990 | 5   | Isoform 2 of A-kinase anchor protein 9                                                                                                                                                                                                                          |
| 922                      | Q99996-6         | 16                   | 24             | 4.6                   | 3929   | 455426 | 5   | Isoform 6 of A-kinase anchor protein 9                                                                                                                                                                                                                          |
| 923                      | P61981           | 15                   | 202            | 82.2                  | 247    | 28303  | 4.9 | 14-3-3 protein gamma 14-3-3 protein gamma                                                                                                                                                                                                                       |
| 924                      | P62714           | 15                   | 86             | 80.3                  | 309    | 35575  | 5.4 | Serine/threonine-protein phosphatase 2A catalytic subunit beta isoform Serine/threonine-protein phosphatase 2A catalytic subunit                                                                                                                                |
| 924                      | Q8WZ56           | 15                   | 86             | 80.3                  | 309    | 35631  | 5.4 | beta isoform                                                                                                                                                                                                                                                    |
| 924                      | Q5U0I7           | 15                   | 86             | 80.3                  | 309    | 35605  | 5.4 | Serine/threonine-protein phosphatase                                                                                                                                                                                                                            |
| 925                      | B9ZVU1           | 15                   | 285            | 47                    | 281    | 30865  | 8.8 | Uncharacterized protein                                                                                                                                                                                                                                         |
| 925                      | Q12771           | 15                   | 285            | 46.2                  | 286    | 31481  | 7.4 | P37 AUF1                                                                                                                                                                                                                                                        |
| 925                      | UPI0000435439    | 15                   | 285            | 46                    | 287    | 30608  | 8.4 | heterogeneous nuclear ribonucleoprotein D0 isoform d                                                                                                                                                                                                            |
| 925                      | Q14103-4         | 15                   | 285            | 46                    | 287    | 30672  | 8.4 | Isoform 4 of Heterogeneous nuclear ribonucleoprotein D0                                                                                                                                                                                                         |
| 925                      | B4DTC3           | 15                   | 285            | 43.6                  | 303    | 33612  | 8.5 | cDNA FLJ54150, highly similar to Heterogeneous nuclear ribonucleoprotein D0                                                                                                                                                                                     |
| 925                      | UPI000043543A    | 15                   | 285            | 39.3                  | 336    | 36208  | 8.1 | heterogeneous nuclear ribonucleoprotein D0 isoform b                                                                                                                                                                                                            |
| 925                      | Q14103-2         | 15                   | 285            | 39.3                  | 336    | 36272  | 8.1 | Isoform 2 of Heterogeneous nuclear ribonucleoprotein D0                                                                                                                                                                                                         |
| 926                      | A8K885           | 15                   | 40             | 36.9                  | 406    | 46648  | 6.3 | mRNA                                                                                                                                                                                                                                                            |
| 926                      | Q9UNH7           | 15                   | 40             | 36.9                  | 406    | 46649  | 6.2 | Sorting nexin-6                                                                                                                                                                                                                                                 |
| 926                      | Q9CZ03           | 15                   | 40             | 36.9                  | 406    | 46649  | 6.2 | Putative uncharacterized protein                                                                                                                                                                                                                                |
| 926                      | Q6P8X1           | 15                   | 40             | 36.9                  | 406    | 46635  | 6   | Sorting nexin-6                                                                                                                                                                                                                                                 |
| 927                      | P14576           | 15                   | 22             | 36.7                  | 504    | 55721  | 8.8 | Signal recognition particle 54 kDa protein                                                                                                                                                                                                                      |
| 927                      | P61011           | 15                   | 22             | 36.7                  | 504    | 55705  | 8.8 | Signal recognition particle 54 kDa protein                                                                                                                                                                                                                      |
| 928                      | B1AQE8           | 15                   | 38             | 7.2                   | 2820   | 317227 | 7.3 | Neurofibromatosis 1                                                                                                                                                                                                                                             |
| 928                      | P21359-2         | 15                   | 38             | 7.2                   | 2818   | 317032 | 7.3 | Isoform 1 of Neurofibromin                                                                                                                                                                                                                                      |
| 928                      | Q04690           | 15                   | 38             | 7.1                   | 2841   | 319595 | 7.4 | Neurofibromin                                                                                                                                                                                                                                                   |
| 928                      | P21359           | 15                   | 38             | 7.1                   | 2839   | 319372 | 7.4 | Neurofibromin                                                                                                                                                                                                                                                   |
| 929                      | P16015           | 15                   | 68             | 83.8                  | 260    | 29366  | 7.4 | Carbonic anhydrase 3                                                                                                                                                                                                                                            |
| 930                      | P35700           | 15                   | 78             | 66.3                  | 199    | 22176  | 8.1 | Peroxisomal protein                                                                                                                                                                                                                                             |
| 931                      | Q9JII6           | 15                   | 48             | 62.8                  | 325    | 36587  | 7.4 | Alcohol dehydrogenase [NADP+]                                                                                                                                                                                                                                   |
| 932                      | E9PX42           | 15                   | 239            | 58                    | 333    | 35757  | 8   | Uncharacterized protein                                                                                                                                                                                                                                         |
| 932                      | P16858           | 15                   | 239            | 58                    | 333    | 35810  | 8.2 | Glyceraldehyde-3-phosphate dehydrogenase                                                                                                                                                                                                                        |
| 933                      | Q9DAW9           | 15                   | 136            | 57.6                  | 330    | 36429  | 5.7 | Calponin-3                                                                                                                                                                                                                                                      |
| 934                      | P08226           | 15                   | 116            | 55                    | 311    | 35867  | 5.7 | Apolipoprotein E                                                                                                                                                                                                                                                |
| 934                      | Q6GTX3           | 15                   | 116            | 55                    | 311    | 35853  | 5.7 | Apoe protein                                                                                                                                                                                                                                                    |
| 934                      | Q4FK40           | 15                   | 116            | 55                    | 311    | 35848  | 5.7 | Apoe protein                                                                                                                                                                                                                                                    |
| 934                      | Q3UBS0           | 15                   | 116            | 55                    | 311    | 35907  | 5.7 | Putative uncharacterized protein                                                                                                                                                                                                                                |
| 935                      | Q3U3L3           | 15                   | 28             | 47.4                  | 378    | 42569  | 5.7 | Putative uncharacterized protein                                                                                                                                                                                                                                |
| 935                      | Q60854           | 15                   | 28             | 47.4                  | 378    | 42599  | 5.7 | Serpin B6                                                                                                                                                                                                                                                       |
| 936                      | P35585           | 15                   | 26             | 46.3                  | 423    | 48543  | 7.3 | AP-1 complex subunit mu-1                                                                                                                                                                                                                                       |
| 937                      | Q3TEU8           | 15                   | 38             | 44.7                  | 474    | 53108  | 6.8 | Putative uncharacterized protein                                                                                                                                                                                                                                |
| 937                      | Q9WUM4           | 15                   | 38             | 44.7                  | 474    | 53121  | 7.1 | Coronin-1C                                                                                                                                                                                                                                                      |
| 937                      | Q5PPQ7           | 15                   | 38             | 44.7                  | 474    | 53093  | 7.1 | Coronin, actin binding protein 1C                                                                                                                                                                                                                               |
| 938                      | D3YTY9           | 15                   | 66             | 42.9                  | 480    | 53205  | 5.1 | Uncharacterized protein                                                                                                                                                                                                                                         |
| 939                      | P80313           | 15                   | 33             | 36.9                  | 544    | 59652  | 7.8 | T-complex protein 1 subunit eta                                                                                                                                                                                                                                 |
| 939                      | Q8C5Q5           | 15                   | 33             | 36.9                  | 544    | 59636  | 7.8 | Putative uncharacterized protein                                                                                                                                                                                                                                |
| 939                      | Q3TJN2           | 15                   | 33             | 36.9                  | 544    | 59638  | 7.8 | Putative uncharacterized protein                                                                                                                                                                                                                                |
| 939                      | Q3TET0           | 15                   | 33             | 36.9                  | 544    | 59684  | 7.8 | Putative uncharacterized protein                                                                                                                                                                                                                                |
| 940                      | Q8CAA7           | 15                   | 49             | 25.9                  | 621    | 70280  | 6.5 | Glucose 1,6-bisphosphate synthase                                                                                                                                                                                                                               |
| 941                      | UPI00004296E7    | 15                   | 53             | 21.5                  | 745    | 84940  | 4.9 | heterogeneous nuclear ribonucleoprotein U-like protein 2                                                                                                                                                                                                        |
| 942                      | Q8BWZ3           | 15                   | 21             | 19.7                  | 972    | 111707 | 6.5 | N-alpha-acetyltransferase 25, NatB auxiliary subunit                                                                                                                                                                                                            |
| 943                      | P51432           | 15                   | 23             | 18.2                  | 1234   | 139492 | 6   | 1-phosphatidylinositol-4,5-bisphosphate phosphodiesterase beta-3                                                                                                                                                                                                |

Table S1. Proteins identified in the OVCAR-3 tumor supernatant by two or more unique peptides.

| Protein or Protein Group | Accession Number | Unique Peptide Count | Spectrum Count | Sequence Coverage (%) | Length | MolWt  | pI   | Descriptive Name                                                                                                                           |
|--------------------------|------------------|----------------------|----------------|-----------------------|--------|--------|------|--------------------------------------------------------------------------------------------------------------------------------------------|
| 943                      | Q8C186           | 15                   | 23             | 18.2                  | 1234   | 139499 | 5.9  | Phospholipase C, beta 3                                                                                                                    |
| 943                      | Q3UI50           | 15                   | 23             | 18.2                  | 1234   | 139487 | 5.9  | Phospholipase C, beta 3, isoform CRA_a                                                                                                     |
| 943                      | Q3TW14           | 15                   | 23             | 18.2                  | 1234   | 139501 | 6    | Putative uncharacterized protein                                                                                                           |
| 944                      | E9Q6U9           | 15                   | 55             | 17.9                  | 1271   | 119605 | 9.1  | Uncharacterized protein                                                                                                                    |
| 944                      | Q01149           | 15                   | 55             | 16.5                  | 1372   | 129557 | 9.2  | Collagen alpha-2(I) chain                                                                                                                  |
| 945                      | Q3TW36           | 15                   | 23             | 16.2                  | 1244   | 137555 | 6.3  | Putative uncharacterized protein                                                                                                           |
| 945                      | Q8CDP6           | 15                   | 23             | 16.2                  | 1244   | 137508 | 6.3  | Putative uncharacterized protein                                                                                                           |
| 945                      | Q6NZR5           | 15                   | 23             | 16.2                  | 1244   | 137524 | 6.3  | Superkiller viralicidic activity 2-like (S. cerevisiae)                                                                                    |
| 946                      | B2RY15           | 15                   | 43             | 16                    | 2542   | 271644 | 5.6  | Tin2 protein                                                                                                                               |
| 946                      | E9PUM4           | 15                   | 43             | 16                    | 2542   | 271665 | 5.6  | Uncharacterized protein                                                                                                                    |
| 947                      | A8K486           | 15                   | 681            | 86.1                  | 165    | 18013  | 6.9  | Peptidyl-prolyl cis-trans isomerase                                                                                                        |
| 947                      | P62937           | 15                   | 681            | 86.1                  | 165    | 18012  | 7.8  | Peptidyl-prolyl cis-trans isomerase A                                                                                                      |
| 948                      | P12004           | 15                   | 89             | 82.4                  | 261    | 28769  | 4.7  | Proliferating cell nuclear antigen                                                                                                         |
| 948                      | Q6FH55           | 15                   | 89             | 82.4                  | 261    | 28706  | 4.7  | Proliferating cell nuclear antigen (Fragment)                                                                                              |
| 949                      | Q95865           | 15                   | 44             | 80.7                  | 285    | 29644  | 6    | N(G),N(G)-dimethylarginine dimethylaminohydrolase 2                                                                                        |
| 950                      | P30711           | 15                   | 48             | 77.1                  | 240    | 27335  | 7.5  | Glutathione S-transferase theta-1                                                                                                          |
| 951                      | O43809           | 15                   | 49             | 73.1                  | 227    | 26227  | 8.8  | Cleavage and polyadenylation specificity factor subunit 5                                                                                  |
| 952                      | Q9Y5P6           | 15                   | 28             | 72.2                  | 360    | 39834  | 6.6  | Mannose-1-phosphate guanyltransferase beta                                                                                                 |
| 952                      | Q9Y5P6-2         | 15                   | 28             | 67.2                  | 387    | 42622  | 6.3  | Isoform 2 of Mannose-1-phosphate guanyltransferase beta                                                                                    |
| 953                      | Q5RLJ0           | 15                   | 62             | 70.9                  | 244    | 27969  | 6.4  | CLE                                                                                                                                        |
| 953                      | Q9Y224           | 15                   | 62             | 70.9                  | 244    | 28068  | 6.7  | UPF0568 protein C14orf166                                                                                                                  |
| 954                      | P60900           | 15                   | 116            | 69.1                  | 246    | 27399  | 6.7  | Proteasome subunit alpha type-6                                                                                                            |
| 955                      | P62979           | 15                   | 364            | 68.6                  | 156    | 17965  | 9.6  | Ubiquitin-40S ribosomal protein S27a                                                                                                       |
| 955                      | Q5RKT7           | 15                   | 364            | 68.6                  | 156    | 17905  | 9.6  | Ribosomal protein S27a                                                                                                                     |
| 956                      | P16152           | 15                   | 92             | 67.1                  | 277    | 30375  | 8.3  | Carbonyl reductase [NADPH] 1                                                                                                               |
| 957                      | Q06830           | 15                   | 122            | 65.8                  | 199    | 22110  | 8.1  | Peroxiredoxin-1                                                                                                                            |
| 958                      | Q99598           | 15                   | 59             | 64.8                  | 290    | 33112  | 6.6  | Translin-associated protein X                                                                                                              |
| 959                      | P54920           | 15                   | 17             | 64.7                  | 295    | 33233  | 5.4  | Alpha-soluble NSF attachment protein                                                                                                       |
| 960                      | P52788           | 15                   | 27             | 63.4                  | 366    | 41268  | 5    | Spermine synthase                                                                                                                          |
| 961                      | Q99426           | 15                   | 43             | 62.7                  | 244    | 27326  | 5.1  | Tubulin-folding cofactor B                                                                                                                 |
| 962                      | Q12792           | 15                   | 111            | 61.4                  | 350    | 40283  | 7    | Twinfilin-1                                                                                                                                |
| 962                      | UPI00015DFEA8    | 15                   | 111            | 58.3                  | 369    | 42365  | 7.2  | Twinfilin-1 (Protein A6) (Protein tyrosine kinase 9)                                                                                       |
| 963                      | Q15019           | 15                   | 55             | 59.3                  | 361    | 41487  | 6.6  | Septin-2                                                                                                                                   |
| 963                      | Q15019-2         | 15                   | 55             | 54                    | 396    | 45461  | 6.9  | Isoform 2 of Septin-2                                                                                                                      |
| 964                      | P46109           | 15                   | 48             | 59.1                  | 303    | 33777  | 6.7  | Crk-like protein                                                                                                                           |
| 965                      | P20042           | 15                   | 37             | 58.9                  | 333    | 38388  | 5.8  | Eukaryotic translation initiation factor 2 subunit 2                                                                                       |
| 966                      | Q9HAB8           | 15                   | 31             | 52.4                  | 311    | 34005  | 6.7  | Phosphopantothenate--cysteine ligase                                                                                                       |
| 967                      | Q00629           | 15                   | 77             | 49.1                  | 521    | 57887  | 5    | Importin subunit alpha-4                                                                                                                   |
| 968                      | Q03154           | 15                   | 32             | 59.6                  | 408    | 45885  | 6.2  | Aminoacylase-1                                                                                                                             |
| 968                      | B4DNW0           | 15                   | 32             | 48.8                  | 498    | 55995  | 7    | cDNA FLJ60317, highly similar to Aminoacylase-1 (EC 3.5.1.14)                                                                              |
| 969                      | O14745           | 15                   | 73             | 46.9                  | 358    | 38868  | 5.8  | Na(+)/H(+) exchange regulatory cofactor NHE-RF1                                                                                            |
| 970                      | Q6XQN6           | 15                   | 38             | 46.7                  | 538    | 57578  | 5.7  | Nicotinate phosphoribosyltransferase                                                                                                       |
| 971                      | Q13098-5         | 15                   | 31             | 45.8                  | 487    | 55093  | 6.6  | Isoform 4 of COP9 signalosome complex subunit 1                                                                                            |
| 971                      | Q13098           | 15                   | 31             | 45.4                  | 491    | 55537  | 6.8  | COP9 signalosome complex subunit 1                                                                                                         |
| 971                      | Q13098-7         | 15                   | 31             | 42.3                  | 527    | 59050  | 6.3  | Isoform 2 of COP9 signalosome complex subunit 1                                                                                            |
| 972                      | P42167           | 15                   | 134            | 44.9                  | 454    | 50670  | 9.4  | Lamina-associated polypeptide 2, isoforms beta/gamma                                                                                       |
| 973                      | Q9UMS4           | 15                   | 34             | 44.8                  | 504    | 55181  | 6.6  | Pre-mRNA-processing factor 19                                                                                                              |
| 974                      | Q8IWB7           | 15                   | 21             | 42.4                  | 410    | 46324  | 7.3  | WD repeat and FYVE domain-containing protein 1                                                                                             |
| 975                      | Q5R644           | 15                   | 50             | 41.7                  | 510    | 56770  | 5.9  | Apoptosis inhibitor 5                                                                                                                      |
| 975                      | Q9BZZ5-4         | 15                   | 50             | 41.7                  | 504    | 56733  | 5.9  | Isoform 4 of Apoptosis inhibitor 5                                                                                                         |
| 976                      | Q53FH8           | 15                   | 51             | 41.6                  | 404    | 46816  | 7.1  | Sorting nexin 5 variant (Fragment)                                                                                                         |
| 976                      | Q9Y5X3           | 15                   | 51             | 41.6                  | 404    | 46817  | 6.8  | Sorting nexin-5                                                                                                                            |
| 976                      | Q6P5V6           | 15                   | 51             | 40.8                  | 412    | 47438  | 7.5  | SNX5 protein (Fragment)                                                                                                                    |
| 977                      | P04424           | 15                   | 31             | 40.5                  | 464    | 51658  | 6.5  | Argininosuccinate lyase                                                                                                                    |
| 978                      | Q13409-3         | 15                   | 41             | 40.8                  | 612    | 68426  | 5.3  | Isoform 2C of Cytoplasmic dynein 1 intermediate chain 2                                                                                    |
| 978                      | Q13409-2         | 15                   | 41             | 39.6                  | 632    | 70645  | 5.2  | Isoform 2B of Cytoplasmic dynein 1 intermediate chain 2                                                                                    |
| 979                      | UPI000198CA76    | 15                   | 46             | 42.1                  | 470    | 51071  | 8.2  | UPI000198CA76 UniRef100 entry                                                                                                              |
| 979                      | P12268           | 15                   | 46             | 38.5                  | 514    | 55805  | 6.9  | Inosine-5'-monophosphate dehydrogenase 2                                                                                                   |
| 980                      | P38159           | 15                   | 139            | 38.1                  | 391    | 42332  | 10.1 | Heterogeneous nuclear ribonucleoprotein G                                                                                                  |
| 981                      | P50579           | 15                   | 28             | 37.9                  | 478    | 52892  | 5.8  | Methionine aminopeptidase 2                                                                                                                |
| 982                      | P52294           | 15                   | 46             | 37.5                  | 538    | 60222  | 5    | Importin subunit alpha-1                                                                                                                   |
| 982                      | Q5BKZ2           | 15                   | 46             | 37.5                  | 538    | 60309  | 5    | Karyopherin alpha 1 (Importin alpha 5)                                                                                                     |
| 983                      | B7ZKK7           | 15                   | 29             | 36.4                  | 546    | 61511  | 8.3  | EIF2AK2 protein                                                                                                                            |
| 983                      | P19525           | 15                   | 29             | 36.1                  | 551    | 62094  | 8.4  | Interferon-induced, double-stranded RNA-activated protein kinase<br>cDNA FLJ37935 fis, clone CTONG2005290, highly similar to               |
| 984                      | B3KTA3           | 15                   | 26             | 36                    | 472    | 52277  | 7.6  | FASCIN                                                                                                                                     |
| 984                      | Q16658           | 15                   | 26             | 34.5                  | 493    | 54530  | 7.2  | Fascin                                                                                                                                     |
| 984                      | Q96IH1           | 15                   | 26             | 34                    | 500    | 55136  | 7.2  | FSCN1 protein (Fragment)                                                                                                                   |
| 985                      | Q96KGG-3         | 15                   | 24             | 38.3                  | 707    | 78696  | 8.4  | Isoform 3 of N-terminal kinase-like protein                                                                                                |
| 985                      | E9PS17           | 15                   | 24             | 35                    | 775    | 85719  | 5.7  | Uncharacterized protein                                                                                                                    |
| 985                      | E9PK59           | 15                   | 24             | 34.7                  | 780    | 86183  | 6.6  | Uncharacterized protein                                                                                                                    |
| 985                      | Q96KGG-4         | 15                   | 24             | 34.7                  | 781    | 86312  | 6.6  | Isoform 4 of N-terminal kinase-like protein                                                                                                |
| 985                      | Q96KGG-2         | 15                   | 24             | 34.3                  | 791    | 88089  | 6.3  | Isoform 2 of N-terminal kinase-like protein                                                                                                |
| 985                      | Q96KGG           | 15                   | 24             | 33.5                  | 808    | 89631  | 6.3  | N-terminal kinase-like protein<br>cDNA FLJ60287, highly similar to Epidermal growth factor receptor<br>kinase substrate 8-like protein 1   |
| 986                      | B4DKV7           | 15                   | 42             | 34.3                  | 659    | 73315  | 6    |                                                                                                                                            |
| 986                      | Q8TE68           | 15                   | 42             | 31.3                  | 723    | 80251  | 6    | Epidermal growth factor receptor kinase substrate 8-like protein 1                                                                         |
| 987                      | P10909           | 15                   | 334            | 31.6                  | 449    | 52495  | 6.3  | Clusterin                                                                                                                                  |
| 987                      | P10909-2         | 15                   | 334            | 28.3                  | 501    | 57833  | 6.7  | Isoform 2 of Clusterin                                                                                                                     |
| 988                      | E9PFM7           | 15                   | 84             | 30.4                  | 710    | 80291  | 8.1  | Uncharacterized protein                                                                                                                    |
| 988                      | Q8IXQ6-2         | 15                   | 84             | 26.4                  | 819    | 92272  | 7.6  | Isoform 2 of Poly [ADP-ribose] polymerase 9                                                                                                |
| 989                      | E7ETU9           | 15                   | 25             | 29.4                  | 703    | 81170  | 6.6  | Uncharacterized protein                                                                                                                    |
| 989                      | O00469           | 15                   | 25             | 28.1                  | 737    | 84686  | 6.7  | Procollagen-lysine,2-oxoglutarate 2-dioxygenase 2                                                                                          |
| 990                      | Q14677           | 15                   | 85             | 28.8                  | 625    | 68259  | 6.4  | Clathrin interactor 1                                                                                                                      |
| 991                      | Q9Y446           | 15                   | 37             | 26.2                  | 797    | 87082  | 9.3  | Plakophilin-3                                                                                                                              |
| 992                      | P43243           | 15                   | 88             | 26                    | 847    | 94623  | 6.3  | Matrin-3                                                                                                                                   |
| 992                      | A8MXP9           | 15                   | 88             | 24.6                  | 895    | 99967  | 6    | Uncharacterized protein                                                                                                                    |
| 993                      | Q96FS1           | 15                   | 67             | 25.1                  | 830    | 92388  | 7.2  | CTNND1 protein (Fragment)                                                                                                                  |
| 993                      | Q60716-5         | 15                   | 67             | 22.3                  | 933    | 104156 | 7    | Isoform 1A of Catenin delta-1                                                                                                              |
| 993                      | E9PN49           | 15                   | 67             | 22.2                  | 938    | 104848 | 6.9  | Uncharacterized protein                                                                                                                    |
| 993                      | Q68DU0           | 15                   | 67             | 22.2                  | 938    | 104818 | 6.9  | Putative uncharacterized protein DKFZp781O2021                                                                                             |
| 993                      | Q60716-3         | 15                   | 67             | 22.2                  | 939    | 104977 | 6.9  | Isoform 1AC of Catenin delta-1                                                                                                             |
| 993                      | Q60716-2         | 15                   | 67             | 21.6                  | 962    | 107349 | 6.3  | Isoform 1AB of Catenin delta-1                                                                                                             |
| 993                      | Q60716           | 15                   | 67             | 21.5                  | 968    | 108170 | 6.2  | Catenin delta-1<br>UDP-N-acetylglucosamine--peptide N-<br>acetylglucosaminyltransferase 110 kDa subunit                                    |
| 994                      | O15294           | 15                   | 17             | 21                    | 1046   | 116924 | 6.7  |                                                                                                                                            |
| 995                      | Q9BXP3           | 15                   | 34             | 19.7                  | 1015   | 114334 | 5.6  | Condensin complex subunit 3<br>cDNA FLJ76822, highly similar to sapiens adaptor-related protein<br>complex 3, beta 1 subunit (AP3B1), mRNA |
| 996                      | A8K586           | 15                   | 15             | 17.5                  | 1094   | 121290 | 6    |                                                                                                                                            |
| 996                      | O00203           | 15                   | 15             | 17.5                  | 1094   | 121320 | 6    | AP-3 complex subunit beta-1                                                                                                                |
| 997                      | Q9BQG0           | 15                   | 23             | 15.3                  | 1328   | 148854 | 9.3  | Myb-binding protein 1A                                                                                                                     |
| 997                      | Q9BQG0-2         | 15                   | 23             | 15.2                  | 1332   | 149366 | 9.3  | Isoform 2 of Myb-binding protein 1A                                                                                                        |

Table S1. Proteins identified in the OVCAR-3 tumor supernatant by two or more unique peptides.

| Protein or<br>Protein<br>Group | Accession Number | Unique<br>Peptide<br>Count | Spectrum<br>Count | Sequence<br>Coverage (%) | Length | MolWt  | pI   | Descriptive Name                                                                    |
|--------------------------------|------------------|----------------------------|-------------------|--------------------------|--------|--------|------|-------------------------------------------------------------------------------------|
| 998                            | B2R6U9           | 15                         | 28                | 15                       | 1218   | 133859 | 6.1  | cDNA, FLJ93126, highly similar to sapiens jagged 1 (Alagille syndrome) (JAG1), mRNA |
| 998                            | P78504           | 15                         | 28                | 15                       | 1218   | 133799 | 6.1  | Protein jagged-1                                                                    |
| 999                            | Q8IUD2-2         | 15                         | 16                | 16.8                     | 992    | 113920 | 6.3  | isoform 2 of ELKS/Rab6-interacting/CAST family member 1                             |
| 999                            | Q8IUD2-3         | 15                         | 16                | 15.3                     | 1088   | 124904 | 6.1  | isoform 3 of ELKS/Rab6-interacting/CAST family member 1                             |
| 999                            | Q8IUD2           | 15                         | 16                | 15                       | 1116   | 128086 | 6    | ELKS/Rab6-interacting/CAST family member 1                                          |
| 1000                           | Q86WJ2           | 15                         | 38                | 14.4                     | 1440   | 162272 | 5.9  | Mutant receptor type protein tyrosine phosphatase K                                 |
| 1000                           | Q68DT8           | 15                         | 38                | 14.4                     | 1440   | 162130 | 5.9  | Putative uncharacterized protein DKFZp686C2268                                      |
| 1000                           | Q15262-2         | 15                         | 38                | 14.4                     | 1440   | 162173 | 5.9  | isoform 2 of Receptor-type tyrosine-protein phosphatase kappa                       |
| 1000                           | B2RTQ8           | 15                         | 38                | 14.3                     | 1446   | 163020 | 5.9  | PTPRK protein                                                                       |
| 1000                           | Q5TG12           | 15                         | 38                | 14.2                     | 1458   | 164202 | 5.8  | Protein tyrosine phosphatase, receptor type, K                                      |
| 1000                           | B7ZMG0           | 15                         | 38                | 14.2                     | 1462   | 164612 | 5.8  | PTPRK protein                                                                       |
| 1000                           | E9PGC5           | 15                         | 38                | 14.1                     | 1472   | 166028 | 5.9  | Uncharacterized protein                                                             |
| 1001                           | UPI0001AE6D3D    | 15                         | 26                | 13.7                     | 1836   | 200240 | 6.7  | Ankyrin-3 (ANK-3) (Ankyrin-G)                                                       |
| 1001                           | UPI00002288BB    | 15                         | 26                | 13.5                     | 1861   | 202591 | 6.7  | ankyrin-3 isoform 3                                                                 |
| 1001                           | Q7Z3G4           | 15                         | 26                | 13.5                     | 1861   | 202591 | 6.7  | Putative uncharacterized protein DKFZp686P17114                                     |
| 1001                           | B4DL1            | 15                         | 26                | 13.4                     | 1868   | 204228 | 6.9  | cDNA FLJ58990, highly similar to Ankyrin-3                                          |
| 1001                           | E9PE32           | 15                         | 26                | 13.4                     | 1868   | 204141 | 6.9  | Uncharacterized protein                                                             |
| 1001                           | Q12955           | 15                         | 26                | 5.7                      | 4377   | 480416 | 6.5  | Ankyrin-3                                                                           |
| 1002                           | A8K9U1           | 15                         | 21                | 10.8                     | 1698   | 191158 | 6    | cDNA FLJ76468, highly similar to sapiens cullin 7 (CUL7), mRNA                      |
| 1002                           | B4DY20           | 15                         | 21                | 10.3                     | 1782   | 199776 | 6    | cDNA FLJ56181, highly similar to Cullin-7                                           |
| 1003                           | P49792           | 15                         | 36                | 6.6                      | 3224   | 358201 | 6.2  | E3 SUMO-protein ligase RanBP2                                                       |
| 1004                           | Q8IVF2           | 15                         | 79                | 3.4                      | 5795   | 616641 | 5.4  | Protein AHNAK2                                                                      |
| 1005                           | P62987           | 14                         | 674               | 66.4                     | 128    | 14728  | 9.8  | Ubiquitin-60S ribosomal protein L40 Ubiquitin-60S ribosomal protein L40             |
| 1006                           | C9J9K3           | 14                         | 149               | 63.6                     | 264    | 29506  | 5.2  | Uncharacterized protein                                                             |
| 1006                           | B2CY77           | 14                         | 149               | 56.9                     | 295    | 32850  | 4.9  | Laminin receptor (Fragment)                                                         |
| 1006                           | P14206           | 14                         | 149               | 56.9                     | 295    | 32838  | 4.9  | 40S ribosomal protein SA                                                            |
| 1006                           | P08865           | 14                         | 149               | 56.9                     | 295    | 32854  | 4.9  | 40S ribosomal protein SA                                                            |
| 1006                           | D3YTT7           | 14                         | 149               | 56.9                     | 295    | 32838  | 4.9  | MCG2650                                                                             |
| 1007                           | Q8CSU0           | 14                         | 69                | 55.8                     | 326    | 36884  | 6    | Regulation of nuclear pre-mRNA domain-containing protein 1B                         |
| 1007                           | Q9NQG5           | 14                         | 69                | 55.8                     | 326    | 36900  | 6    | Regulation of nuclear pre-mRNA domain-containing protein 1B                         |
| 1008                           | O35864           | 14                         | 33                | 55.4                     | 334    | 37549  | 6.5  | COP9 signalosome complex subunit 5                                                  |
| 1008                           | Q92905           | 14                         | 33                | 55.4                     | 334    | 37579  | 6.5  | COP9 signalosome complex subunit 5                                                  |
| 1009                           | B4DM97           | 14                         | 44                | 53                       | 334    | 38275  | 7    | cDNA FLJ55002, highly similar to Alpha-centractin                                   |
| 1009                           | E9PGF2           | 14                         | 44                | 52.8                     | 335    | 38372  | 7    | Uncharacterized protein                                                             |
| 1009                           | P61163           | 14                         | 44                | 47.1                     | 376    | 42614  | 6.6  | Alpha-centractin Alpha-centractin                                                   |
| 1010                           | P46781           | 14                         | 87                | 52.1                     | 194    | 22591  | 10.7 | 40S ribosomal protein S9 40S ribosomal protein S9                                   |
| 1011                           | Q96IR1           | 14                         | 172               | 53.1                     | 243    | 27260  | 9.9  | RPS4X protein (Fragment) RPS4X protein (Fragment)                                   |
| 1011                           | P62701           | 14                         | 172               | 49                       | 263    | 29598  | 10.2 | isoform                                                                             |
| 1011                           | Q53HV1           | 14                         | 172               | 49                       | 263    | 29579  | 10.1 | Ribosomal protein S4, X-linked X isoform variant (Fragment)                         |
| 1011                           | Q3UXQ6           | 14                         | 172               | 49                       | 263    | 29564  | 10.2 | Putative uncharacterized protein                                                    |
| 1012                           | Q2TAY7           | 14                         | 38                | 42.5                     | 513    | 57544  | 7.2  | WD40 repeat-containing protein SMU1 WD40 repeat-containing protein SMU1             |
| 1013                           | B4DII5           | 14                         | 39                | 29.5                     | 533    | 59641  | 5    | cDNA FLJ53998, highly similar to Importin alpha-7 subunit                           |
| 1013                           | O60684           | 14                         | 39                | 29.3                     | 536    | 60030  | 5    | Importin subunit alpha-7                                                            |
| 1013                           | O35345           | 14                         | 39                | 29.3                     | 536    | 59964  | 4.9  | Importin subunit alpha-7                                                            |
| 1013                           | B4DWWX3          | 14                         | 39                | 29                       | 541    | 60580  | 5    | cDNA FLJ53229, highly similar to Importin alpha-7 subunit                           |
| 1014                           | Q05DR5           | 14                         | 38                | 30.6                     | 633    | 72784  | 6.7  | Ssrp1 protein (Fragment)                                                            |
| 1014                           | Q08945           | 14                         | 38                | 27.4                     | 709    | 81075  | 6.9  | FACT complex subunit SSRP1                                                          |
| 1014                           | Q08943           | 14                         | 38                | 27.4                     | 708    | 80860  | 6.8  | FACT complex subunit SSRP1                                                          |
| 1014                           | E9QK81           | 14                         | 38                | 27.2                     | 713    | 81377  | 6.8  | Uncharacterized protein                                                             |
| 1014                           | Q08943-2         | 14                         | 38                | 27.2                     | 713    | 81475  | 7    | isoform 2 of FACT complex subunit SSRP1                                             |
| 1015                           | A8DUK4           | 14                         | 405               | 89.8                     | 147    | 15748  | 7.7  | Beta-globin                                                                         |
| 1016                           | D3ZCX0           | 14                         | 42                | 74.7                     | 277    | 31461  | 8.6  | RCG55799, isoform CRA_a                                                             |
| 1017                           | Q3UAJ1           | 14                         | 487               | 74.4                     | 164    | 17943  | 7.9  | Peptidyl-prolyl cis-trans isomerase                                                 |
| 1018                           | P15626           | 14                         | 34                | 61.5                     | 218    | 25717  | 7.4  | Glutathione S-transferase Mu 2                                                      |
| 1019                           | Q3TN31           | 14                         | 46                | 60.1                     | 248    | 27908  | 8.8  | Proteasome subunit alpha type                                                       |
| 1019                           | Q9Z2U0           | 14                         | 46                | 60.1                     | 248    | 27855  | 8.5  | Proteasome subunit alpha type-7                                                     |
| 1020                           | P42208           | 14                         | 55                | 59                       | 361    | 41526  | 6.5  | Septin-2                                                                            |
| 1021                           | O70400           | 14                         | 94                | 58.7                     | 327    | 35774  | 6.8  | PDZ and LIM domain protein 1                                                        |
| 1022                           | Q62348           | 14                         | 47                | 57.9                     | 228    | 26201  | 6.4  | Translin                                                                            |
| 1023                           | P14152           | 14                         | 39                | 56.3                     | 334    | 36511  | 6.6  | Malate dehydrogenase, cytoplasmic                                                   |
| 1024                           | Q6IRU2           | 14                         | 40                | 56                       | 248    | 28468  | 4.7  | Tropomyosin alpha-4 chain                                                           |
| 1025                           | O35685           | 14                         | 23                | 51.8                     | 332    | 38358  | 5.3  | Nuclear migration protein nudC                                                      |
| 1026                           | Q3TF62           | 14                         | 25                | 49.7                     | 429    | 47520  | 5.5  | Putative uncharacterized protein                                                    |
| 1026                           | Q9Z2N8           | 14                         | 25                | 49.7                     | 429    | 47448  | 5.6  | Actin-like protein 6A                                                               |
| 1027                           | P97298           | 14                         | 41                | 48.2                     | 417    | 46234  | 7    | Pigment epithelium-derived factor                                                   |
| 1028                           | Q3UAG2           | 14                         | 61                | 42.7                     | 483    | 53246  | 7.2  | 6-phosphogluconate dehydrogenase, decarboxylating                                   |
| 1028                           | Q9DCD0           | 14                         | 61                | 42.7                     | 483    | 53247  | 7.2  | 6-phosphogluconate dehydrogenase, decarboxylating                                   |
| 1029                           | Q9Z0P5-2         | 14                         | 80                | 42.9                     | 347    | 39312  | 6.7  | isoform 2 of Twinfilin-2                                                            |
| 1029                           | Q9Z0P5           | 14                         | 80                | 42.7                     | 349    | 39471  | 6.8  | Twinfilin-2                                                                         |
| 1030                           | Q3TG21           | 14                         | 31                | 42.1                     | 382    | 43816  | 7.8  | Putative uncharacterized protein                                                    |
| 1030                           | Q9Z1G3           | 14                         | 31                | 42.1                     | 382    | 43888  | 7.5  | V-type proton ATPase subunit C 1                                                    |
| 1031                           | Q9Z204-4         | 14                         | 322               | 41.8                     | 292    | 32223  | 5.1  | isoform 4 of Heterogeneous nuclear ribonucleoproteins C1/C2                         |
| 1031                           | Q9Z204-3         | 14                         | 322               | 41.6                     | 293    | 32322  | 5.1  | isoform 3 of Heterogeneous nuclear ribonucleoproteins C1/C2                         |
| 1031                           | Q9Z204-2         | 14                         | 322               | 40.7                     | 300    | 33056  | 5    | isoform C1 of Heterogeneous nuclear ribonucleoproteins C1/C2                        |
| 1032                           | P16460           | 14                         | 108               | 39.1                     | 412    | 46585  | 8.2  | Argininosuccinate synthase                                                          |
| 1032                           | Q3UEJ7           | 14                         | 108               | 39.1                     | 412    | 46557  | 8.2  | Argininosuccinate synthase                                                          |
| 1033                           | P26638           | 14                         | 31                | 39.1                     | 512    | 58389  | 6.3  | Seryl-tRNA synthetase, cytoplasmic                                                  |
| 1033                           | Q3U6F6           | 14                         | 31                | 39.1                     | 512    | 58359  | 6.3  | Putative uncharacterized protein                                                    |
| 1033                           | Q8C483           | 14                         | 31                | 37.3                     | 536    | 61167  | 7.4  | Seryl-aminoacyl-tRNA synthetase                                                     |
| 1034                           | Q61553           | 14                         | 24                | 31.8                     | 493    | 54508  | 6.9  | Fascin                                                                              |
| 1035                           | P24527           | 14                         | 52                | 31.3                     | 611    | 69021  | 6.4  | Leukotriene A-4 hydrolase                                                           |
| 1035                           | Q3UY71           | 14                         | 52                | 31.3                     | 611    | 69051  | 6.4  | Putative uncharacterized protein                                                    |
| 1036                           | Q9ESB3           | 14                         | 63                | 31.4                     | 525    | 59133  | 7.7  | Histidine-rich glycoprotein                                                         |
| 1036                           | Q6YK32           | 14                         | 63                | 30.8                     | 536    | 60439  | 7.6  | Histidine-rich glycoprotein HRG                                                     |
| 1036                           | Q6YKA2           | 14                         | 63                | 30.8                     | 536    | 60495  | 7.6  | Histidine-rich glycoprotein Hrg                                                     |
| 1037                           | Q02788           | 14                         | 16                | 22.1                     | 1034   | 110334 | 6.4  | Collagen alpha-2(VI) chain                                                          |
| 1038                           | Q9UKK9           | 14                         | 34                | 82.2                     | 219    | 24328  | 4.9  | ADP-sugar pyrophosphatase                                                           |
| 1038                           | A6NFX8           | 14                         | 34                | 77.6                     | 232    | 25895  | 5.2  | Uncharacterized protein                                                             |
| 1039                           | B4DRY4           | 14                         | 36                | 76.4                     | 191    | 22610  | 5.3  | cDNA FLJ60842, highly similar to Glutathione S-transferase Mu 2 (EC 2.5.1.18)       |
| 1039                           | E9PEM9           | 14                         | 36                | 76.4                     | 191    | 22644  | 5.3  | Uncharacterized protein                                                             |
| 1039                           | E9PHN6           | 14                         | 36                | 75.6                     | 193    | 22876  | 5.2  | Uncharacterized protein                                                             |
| 1039                           | P28161           | 14                         | 36                | 67                       | 218    | 25745  | 6.4  | Glutathione S-transferase Mu 2                                                      |
| 1039                           | UPI0000169F93    | 14                         | 36                | 66.4                     | 220    | 26098  | 5.5  | Glutathione S-transferase Mu 2 (EC 2.5.1.18) (GST class-mu 2)                       |
| 1040                           | Q15404           | 14                         | 39                | 74.7                     | 277    | 31540  | 8.6  | Ras suppressor protein 1                                                            |
| 1041                           | P60981           | 14                         | 223               | 73.9                     | 165    | 18506  | 7.9  | Dextrin                                                                             |
| 1042                           | P19623           | 14                         | 31                | 72.5                     | 302    | 33825  | 5.5  | Spermidine synthase                                                                 |
| 1043                           | P78417           | 14                         | 37                | 71.8                     | 241    | 27566  | 6.6  | Glutathione S-transferase omega-1                                                   |

Table S1. Proteins identified in the OVCAR-3 tumor supernatant by two or more unique peptides.

| Protein or Protein Group | Accession Number | Unique Peptide Count | Spectrum Count | Sequence Coverage (%) | Length | MolWt  | pI   | Descriptive Name                                                                                                                 |
|--------------------------|------------------|----------------------|----------------|-----------------------|--------|--------|------|----------------------------------------------------------------------------------------------------------------------------------|
| 1044                     | P29373           | 14                   | 1007           | 71.7                  | 136    | 15693  | 5.4  | Cellular retinoic acid-binding protein 2                                                                                         |
| 1045                     | Q9NPF4           | 14                   | 32             | 70.1                  | 335    | 36427  | 6.4  | Probable O-sialoglycoprotein endopeptidase                                                                                       |
| 1046                     | Q86X76-2         | 14                   | 42             | 73.9                  | 291    | 31859  | 6.9  | Isoform 1 of Nitrilase log 1                                                                                                     |
| 1046                     | B7Z410           | 14                   | 42             | 68.9                  | 312    | 34265  | 7.6  | cDNA FLJ50791, highly similar to Nitrilase log 1 (EC 3.5.-.-)                                                                    |
| 1046                     | Q86X76-4         | 14                   | 42             | 68.9                  | 312    | 34323  | 7.4  | Isoform 5 of Nitrilase log 1                                                                                                     |
| 1046                     | Q86X76           | 14                   | 42             | 65.7                  | 327    | 35896  | 7.7  | Nitrilase log 1                                                                                                                  |
| 1047                     | B3KR50           | 14                   | 44             | 67.7                  | 217    | 25194  | 6.3  | cDNA FLJ33691 fis, clone BRAWH2002976, highly similar to GROWTH FACTOR RECEPTOR-BOUND PROTEIN 2                                  |
| 1047                     | P62993           | 14                   | 44             | 67.7                  | 217    | 25206  | 6.3  | Growth factor receptor-bound protein 2                                                                                           |
| 1048                     | Q08257           | 14                   | 22             | 66                    | 329    | 35207  | 8.4  | Quinone oxidoreductase                                                                                                           |
| 1049                     | Q9H4A5           | 14                   | 31             | 66                    | 285    | 32767  | 5.8  | Golgi phosphoprotein 3-like                                                                                                      |
| 1050                     | P21964           | 14                   | 54             | 65.7                  | 271    | 30037  | 5.5  | Catechol O-methyltransferase                                                                                                     |
| 1051                     | O14579           | 14                   | 45             | 64                    | 308    | 34482  | 5.1  | Coatmer subunit epsilon                                                                                                          |
| 1052                     | P18065           | 14                   | 92             | 62.5                  | 325    | 34814  | 7.5  | Insulin-like growth factor-binding protein 2                                                                                     |
| 1053                     | E9PGT1           | 14                   | 53             | 60.1                  | 223    | 25572  | 6.9  | Uncharacterized protein                                                                                                          |
| 1053                     | O15631           | 14                   | 53             | 58.8                  | 228    | 26183  | 6.4  | Translin                                                                                                                         |
| 1054                     | O14818           | 14                   | 53             | 60.1                  | 248    | 27887  | 8.5  | Proteasome subunit alpha type-7                                                                                                  |
| 1055                     | D0EK55           | 14                   | 26             | 57.3                  | 337    | 38489  | 6.8  | Aryl hydrocarbon receptor interacting protein                                                                                    |
| 1056                     | Q9NX46           | 14                   | 34             | 56.2                  | 363    | 38947  | 5.1  | Poly(ADP-ribose) glycohydrolase ARH3                                                                                             |
| 1057                     | O14929           | 14                   | 32             | 55.1                  | 419    | 49513  | 5.7  | Histone acetyltransferase type B catalytic subunit                                                                               |
| 1058                     | Q8WXX5           | 14                   | 70             | 55                    | 260    | 29910  | 5.7  | DnaJ log subfamily C member 9                                                                                                    |
| 1059                     | Q92747           | 14                   | 28             | 53.5                  | 370    | 41569  | 8.2  | Actin-related protein 2/3 complex subunit 1A                                                                                     |
| 1060                     | Q9UBQ7           | 14                   | 40             | 53.4                  | 328    | 35668  | 7.4  | Glyoxylate reductase/hydroxypyruvate reductase                                                                                   |
| 1061                     | Q9P0L0           | 14                   | 90             | 51                    | 249    | 27893  | 8.6  | Vesicle-associated membrane protein-associated protein A                                                                         |
| 1062                     | A8MUW5           | 14                   | 48             | 50.6                  | 433    | 45547  | 8.7  | Uncharacterized protein                                                                                                          |
| 1063                     | E9PC19           | 14                   | 62             | 49.6                  | 353    | 40532  | 5.2  | Uncharacterized protein                                                                                                          |
| 1063                     | P14324           | 14                   | 62             | 41.8                  | 419    | 48276  | 6.2  | Farnesyl pyrophosphate synthase                                                                                                  |
| 1064                     | B4DJQ8           | 14                   | 56             | 46.6                  | 446    | 50152  | 7    | cDNA FLJ55694, highly similar to Dipeptidyl-peptidase 1 (EC 3.4.14.1)                                                            |
| 1065                     | P09972           | 14                   | 40             | 57.4                  | 366    | 39456  | 6.9  | Fructose-bisphosphate aldolase C                                                                                                 |
| 1065                     | B7Z3K9           | 14                   | 40             | 46.3                  | 451    | 48408  | 8.1  | Fructose-bisphosphate aldolase                                                                                                   |
| 1066                     | Q02878           | 14                   | 107            | 45.1                  | 288    | 32728  | 10.6 | 60S ribosomal protein L6                                                                                                         |
| 1066                     | Q8TBK5           | 14                   | 107            | 45.1                  | 288    | 32742  | 10.6 | 60S ribosomal protein L6                                                                                                         |
| 1066                     | Q8N5Z7           | 14                   | 107            | 45.1                  | 288    | 32726  | 10.6 | 60S ribosomal protein L6                                                                                                         |
| 1066                     | Q9HBB3           | 14                   | 107            | 45                    | 289    | 32891  | 10.6 | 60S ribosomal protein L6                                                                                                         |
| 1067                     | P07954-2         | 14                   | 33             | 48.8                  | 467    | 50213  | 7.4  | Isoform Cytoplasmic of Fumarate hydratase, mitochondrial                                                                         |
| 1067                     | P07954           | 14                   | 33             | 44.7                  | 510    | 54637  | 8.8  | Fumarate hydratase, mitochondrial                                                                                                |
| 1068                     | Q5JVF3-2         | 14                   | 16             | 44.8                  | 397    | 45773  | 8.5  | Isoform 2 of PCI domain-containing protein 2                                                                                     |
| 1068                     | Q5JVF3           | 14                   | 16             | 44.6                  | 399    | 46030  | 8.5  | PCI domain-containing protein 2                                                                                                  |
| 1068                     | A6NM51           | 14                   | 16             | 44.5                  | 400    | 46134  | 8.5  | Uncharacterized protein                                                                                                          |
| 1068                     | C9J439           | 14                   | 16             | 44.4                  | 401    | 46294  | 8.5  | Uncharacterized protein                                                                                                          |
| 1068                     | Q5JVF3-4         | 14                   | 16             | 39.3                  | 453    | 52100  | 8.5  | Isoform 4 of PCI domain-containing protein 2                                                                                     |
| 1069                     | A8MQ60           | 14                   | 33             | 44.2                  | 364    | 41856  | 7    | Uncharacterized protein                                                                                                          |
| 1069                     | P21283           | 14                   | 33             | 42.1                  | 362    | 43942  | 7.5  | V-type proton ATPase subunit C 1                                                                                                 |
| 1070                     | Q9UI12-2         | 14                   | 20             | 44.5                  | 485    | 54151  | 6.5  | Isoform 2 of V-type proton ATPase subunit H                                                                                      |
| 1070                     | B3KUZ7           | 14                   | 20             | 42.9                  | 483    | 55911  | 6.5  | Vacuolar ATP synthase subunit H (EC 3.6.3.14)                                                                                    |
| 1070                     | Q9UI12           | 14                   | 20             | 42.9                  | 483    | 55883  | 6.5  | V-type proton ATPase subunit H                                                                                                   |
| 1071                     | P13796           | 14                   | 40             | 42.7                  | 627    | 70289  | 5.4  | Plastin-2                                                                                                                        |
| 1072                     | Q9GZT8           | 14                   | 36             | 42.7                  | 377    | 41968  | 6.7  | NIF3-like protein 1                                                                                                              |
| 1073                     | A5PLK7           | 14                   | 39             | 42                    | 457    | 49679  | 8.7  | RCC2 protein (Fragment)                                                                                                          |
| 1073                     | Q9P258           | 14                   | 39             | 36.8                  | 522    | 56085  | 8.8  | Protein RCC2                                                                                                                     |
| 1074                     | P31350           | 14                   | 47             | 47                    | 389    | 44878  | 5.4  | Ribonucleoside-diphosphate reductase subunit M2                                                                                  |
| 1074                     | D6W4Z6           | 14                   | 47             | 40.8                  | 449    | 51077  | 6.5  | HCG23833, isoform CRA_b                                                                                                          |
| 1074                     | UPI000066D98A    | 14                   | 47             | 40.8                  | 449    | 51093  | 6.5  | ribonucleoside-diphosphate reductase subunit M2 isoform 1                                                                        |
| 1075                     | P41743           | 14                   | 72             | 39.6                  | 596    | 68262  | 5.8  | Protein kinase C iota type                                                                                                       |
| 1076                     | B2R665           | 14                   | 54             | 39.4                  | 546    | 59242  | 4.4  | cDNA, FLJ92810, highly similar to sapiens protein phosphatase 1G (formerly 2C), magnesium-dependent, gamma isoform (PPM1G), mRNA |
| 1076                     | O15355           | 14                   | 54             | 39.4                  | 546    | 59272  | 4.4  | Protein phosphatase 1G                                                                                                           |
| 1077                     | P55795           | 14                   | 122            | 37.4                  | 449    | 49264  | 6.3  | Heterogeneous nuclear ribonucleoprotein H2                                                                                       |
| 1078                     | Q96JB5           | 14                   | 44             | 31.6                  | 506    | 56921  | 4.8  | CDK5 regulatory subunit-associated protein 3                                                                                     |
| 1079                     | Q8N8S7           | 14                   | 59             | 31.5                  | 591    | 66510  | 6.9  | Protein enabled log                                                                                                              |
| 1080                     | Q5PRF9           | 14                   | 89             | 31.3                  | 694    | 75483  | 6.8  | Protein Smaug log 2                                                                                                              |
| 1081                     | A0MZ66           | 14                   | 25             | 30.1                  | 631    | 71640  | 5.3  | Shootin-1                                                                                                                        |
| 1081                     | A0MZ66-3         | 14                   | 25             | 29.3                  | 649    | 73609  | 5.4  | Isoform 3 of Shootin-1                                                                                                           |
| 1082                     | Q7Z4V5           | 14                   | 41             | 28.2                  | 671    | 74317  | 7.5  | Hepatitis-derived growth factor-related protein 2                                                                                |
| 1083                     | B3KM47           | 14                   | 25             | 22.5                  | 1000   | 111115 | 5.5  | cDNA FLJ10273 fis, clone HEMBB1001137, highly similar to SEC23-interacting protein                                               |
| 1083                     | Q9Y6Y8           | 14                   | 25             | 22.5                  | 1000   | 111076 | 5.5  | SEC23-interacting protein                                                                                                        |
| 1084                     | UPI000011DDE0    | 14                   | 29             | 24.7                  | 810    | 90855  | 6.1  | UPI000011DDE0 UniRef100 entry                                                                                                    |
| 1084                     | Q53GS1           | 14                   | 29             | 22.8                  | 878    | 98262  | 5.6  | MutS log 2 variant (Fragment)                                                                                                    |
| 1084                     | Q53FK0           | 14                   | 29             | 22.8                  | 878    | 98222  | 5.7  | MutS log 2 variant (Fragment)                                                                                                    |
| 1084                     | E9PHA6           | 14                   | 29             | 21.7                  | 921    | 103187 | 6.1  | Uncharacterized protein                                                                                                          |
| 1084                     | P43246           | 14                   | 29             | 21.4                  | 934    | 104743 | 5.8  | DNA mismatch repair protein Msh2                                                                                                 |
| 1085                     | B2RCJ6           | 14                   | 15             | 19                    | 1224   | 136777 | 6.9  | cDNA, FLJ96114, highly similar to sapiens bromodomain and WD repeat domain containing 2 (BRWD2), mRNA                            |
| 1085                     | Q9BZH6           | 14                   | 15             | 19                    | 1224   | 136685 | 6.9  | WD repeat-containing protein 11                                                                                                  |
| 1085                     | C9J8X2           | 14                   | 15             | 19                    | 1224   | 136670 | 6.9  | Bromodomain and WD repeat domain containing 2, isoform CRA_c                                                                     |
| 1086                     | Q14118           | 14                   | 57             | 18.2                  | 895    | 97441  | 8.6  | Dystrroglycan                                                                                                                    |
| 1087                     | B7Z2R8           | 14                   | 32             | 16.5                  | 1221   | 137330 | 8    | cDNA FLJ53324, highly similar to Tight junction protein ZO-2                                                                     |
| 1088                     | Q9P2D3-3         | 14                   | 29             | 12.6                  | 1982   | 214992 | 7.4  | Isoform 3 of HEAT repeat-containing protein 5B                                                                                   |
| 1088                     | B9EK47           | 14                   | 29             | 12                    | 2071   | 224274 | 7.2  | HEAT repeat-containing 5B                                                                                                        |
| 1088                     | Q9P2D3           | 14                   | 29             | 12                    | 2071   | 224300 | 7.2  | HEAT repeat-containing protein 5B                                                                                                |
| 1089                     | O94822           | 14                   | 27             | 11.9                  | 1766   | 200550 | 6.3  | E3 ubiquitin-protein ligase listerin                                                                                             |
| 1090                     | Q149P0           | 14                   | 32             | 11.5                  | 1855   | 206015 | 5.8  | GBF1 protein                                                                                                                     |
| 1090                     | UPI0001EC5F2E    | 14                   | 32             | 11.5                  | 1856   | 206143 | 5.8  | Golgi-specific brefeldin A-resistance guanine nucleotide exchange factor 1 isoform 2                                             |
| 1090                     | Q92538           | 14                   | 32             | 11.5                  | 1859   | 206444 | 5.7  | Golgi-specific brefeldin A-resistance guanine nucleotide exchange factor 1                                                       |
| 1091                     | Q14C86-4         | 14                   | 17             | 11.3                  | 1439   | 160605 | 5.2  | Isoform 4 of GTPase-activating protein and VPS9 domain-containing protein 1                                                      |
| 1091                     | Q14C86-5         | 14                   | 17             | 11.2                  | 1452   | 162230 | 5.2  | Isoform 5 of GTPase-activating protein and VPS9 domain-containing protein 1                                                      |
| 1091                     | Q14C86-2         | 14                   | 17             | 11.1                  | 1460   | 162897 | 5.2  | Isoform 2 of GTPase-activating protein and VPS9 domain-containing protein 1                                                      |
| 1091                     | Q14C86           | 14                   | 17             | 11                    | 1478   | 164979 | 5.2  | GTPase-activating protein and VPS9 domain-containing protein 1                                                                   |
| 1091                     | Q14C86-6         | 14                   | 17             | 10.9                  | 1487   | 166168 | 5.2  | Isoform 6 of GTPase-activating protein and VPS9 domain-containing protein 1                                                      |
| 1092                     | D3DS86           | 14                   | 24             | 7.9                   | 2610   | 289367 | 5.4  | HECT domain containing 1, isoform CRA_a                                                                                          |
| 1092                     | Q9ULT8           | 14                   | 24             | 7.9                   | 2610   | 289383 | 5.4  | E3 ubiquitin-protein ligase HECTD1                                                                                               |

Table S1. Proteins identified in the OVCAR-3 tumor supernatant by two or more unique peptides.

| Protein or Protein Group | Accession Number | Unique Peptide Count | Spectrum Count | Sequence Coverage (%) | Length | MolWt  | pI   | Descriptive Name                                                                                                |
|--------------------------|------------------|----------------------|----------------|-----------------------|--------|--------|------|-----------------------------------------------------------------------------------------------------------------|
| 1092                     | UPI00015DFD38    | 14                   | 24             | 7.8                   | 2612   | 289488 | 5.4  | E3 ubiquitin-protein ligase HECTD1 (HECT domain-containing protein 1) (E3 ligase for inhibin receptor) (EULIR). |
| 1093                     | C9JUT5           | 14                   | 33             | 4.2                   | 4862   | 532362 | 6    | Uncharacterized protein                                                                                         |
| 1093                     | Q15751           | 14                   | 33             | 4.2                   | 4861   | 532234 | 6    | Probable E3 ubiquitin-protein ligase HERC1                                                                      |
| 1094                     | P63208           | 13                   | 151            | 85.3                  | 163    | 18658  | 4.5  | S-phase kinase-associated protein 1                                                                             |
| 1094                     | Q9WTX5           | 13                   | 151            | 85.3                  | 163    | 18672  | 4.5  | S-phase kinase-associated protein 1                                                                             |
| 1095                     | O00487           | 13                   | 60             | 65.2                  | 310    | 34577  | 6.5  | 26S proteasome non-ATPase regulatory subunit 14 26S proteasome non-ATPase regulatory subunit 14                 |
| 1096                     | P62906           | 13                   | 130            | 55.3                  | 217    | 24831  | 9.9  | 60S ribosomal protein L10a 60S ribosomal protein L10a                                                           |
| 1097                     | P62826           | 13                   | 192            | 52.8                  | 216    | 24423  | 7.5  | GTP-binding nuclear protein Ran GTP-binding nuclear protein Ran                                                 |
| 1097                     | Q3ULW0           | 13                   | 192            | 52.8                  | 216    | 24351  | 7.9  | Putative uncharacterized protein                                                                                |
| 1097                     | UPI0000E59AAE    | 13                   | 192            | 48.7                  | 234    | 26816  | 9.6  | GTP-binding nuclear protein Ran (GTPase Ran) (Ras-like protein TC4) (Androgen receptor-associated protein 24).  |
| 1098                     | P70288           | 13                   | 21             | 43                    | 488    | 55302  | 5.9  | Histone deacetylase 2                                                                                           |
| 1098                     | Q92769           | 13                   | 21             | 43                    | 488    | 55364  | 5.9  | Histone deacetylase 2                                                                                           |
| 1098                     | UPI0000E5924D    | 13                   | 21             | 36.1                  | 582    | 65538  | 7    | Histone deacetylase 2 (HD2).                                                                                    |
| 1099                     | Q9D5V5           | 13                   | 25             | 22.3                  | 780    | 90974  | 7.8  | Cullin-5                                                                                                        |
| 1099                     | Q93034           | 13                   | 25             | 22.3                  | 780    | 90955  | 8    | Cullin-5                                                                                                        |
| 1099                     | E9PV12           | 13                   | 25             | 21                    | 828    | 95851  | 8.8  | Uncharacterized protein                                                                                         |
| 1100                     | P62975           | 13                   | 339            | 100                   | 76     | 8565   | 7.2  | Ubiquitin                                                                                                       |
| 1101                     | Q3UCL5           | 13                   | 116            | 81.4                  | 183    | 20756  | 6    | Ferritin                                                                                                        |
| 1101                     | Q9CPX4           | 13                   | 116            | 81.4                  | 183    | 20772  | 6    | Ferritin                                                                                                        |
| 1102                     | B2KFX8           | 13                   | 79             | 75.5                  | 188    | 19908  | 6.8  | Parkinson disease (Autosomal recessive, early onset) 7                                                          |
| 1102                     | Q99LX0           | 13                   | 79             | 75.1                  | 189    | 20021  | 6.8  | Protein DJ-1                                                                                                    |
| 1103                     | Q9Z1Q5           | 13                   | 50             | 73.9                  | 241    | 27013  | 5.2  | Chloride intracellular channel protein 1                                                                        |
| 1104                     | Q8CDN6           | 13                   | 47             | 70.9                  | 289    | 32237  | 5    | Thioredoxin-like protein 1                                                                                      |
| 1105                     | O88958           | 13                   | 77             | 63                    | 289    | 32550  | 6.5  | Glucosamine-6-phosphate isomerase 1                                                                             |
| 1106                     | Q61166           | 13                   | 101            | 61.9                  | 268    | 30016  | 5.2  | Microtubule-associated protein RP/EB family member 1                                                            |
| 1107                     | Q9DCT8           | 13                   | 52             | 61.1                  | 208    | 22727  | 8.6  | Cysteine-rich protein 2                                                                                         |
| 1108                     | Q99PT1           | 13                   | 159            | 58.3                  | 204    | 23407  | 5.2  | Rho GDP-dissociation inhibitor 1                                                                                |
| 1109                     | Q9CXW3           | 13                   | 68             | 57.2                  | 229    | 26510  | 7.9  | Calycylin-binding protein                                                                                       |
| 1110                     | P53810           | 13                   | 30             | 55.4                  | 271    | 31893  | 6.4  | Phosphatidylinositol transfer protein alpha isoform                                                             |
| 1110                     | Q3UE53           | 13                   | 30             | 55.4                  | 271    | 31927  | 6.4  | Putative uncharacterized protein                                                                                |
| 1110                     | Q3TG16           | 13                   | 30             | 43.2                  | 347    | 39648  | 8.7  | Putative uncharacterized protein (Fragment)                                                                     |
| 1110                     | UPI0001F79390    | 13                   | 30             | 43                    | 349    | 40036  | 8.7  | UPI0001F79390 UniRef100 entry                                                                                   |
| 1110                     | Q3TIQ3           | 13                   | 30             | 42.9                  | 350    | 40215  | 8.8  | Putative uncharacterized protein (Fragment)                                                                     |
| 1111                     | P28352           | 13                   | 71             | 54.6                  | 317    | 35490  | 7.9  | DNA-(apurinic or apyrimidinic site) lyase                                                                       |
| 1112                     | Q04447           | 13                   | 41             | 54.3                  | 381    | 42713  | 5.7  | Creatine kinase B-type                                                                                          |
| 1113                     | P97447           | 13                   | 35             | 59.6                  | 280    | 31889  | 8.4  | Four and a half LIM domains protein 1                                                                           |
| 1113                     | A2AEX6           | 13                   | 35             | 54                    | 309    | 35081  | 8.4  | Four and a half LIM domains 1                                                                                   |
| 1114                     | P23492           | 13                   | 29             | 50.9                  | 289    | 32277  | 6.2  | Purine nucleoside phosphorylase                                                                                 |
| 1114                     | Q543K9           | 13                   | 29             | 50.9                  | 289    | 32263  | 6.2  | Pnp protein                                                                                                     |
| 1115                     | Q00623           | 13                   | 163            | 50.4                  | 264    | 30587  | 5.9  | Apolipoprotein A-I                                                                                              |
| 1115                     | Q8BPD5           | 13                   | 163            | 50.4                  | 264    | 30615  | 5.7  | Putative uncharacterized protein                                                                                |
| 1115                     | Q3V2G1           | 13                   | 163            | 50.4                  | 264    | 30685  | 5.9  | Putative uncharacterized protein                                                                                |
| 1116                     | Q9DCJ9           | 13                   | 17             | 50                    | 320    | 35130  | 8    | N-acetylneuraminase lyase                                                                                       |
| 1117                     | Q3TFK4           | 13                   | 24             | 47.1                  | 323    | 36326  | 5.9  | Putative uncharacterized protein                                                                                |
| 1117                     | Q8C1X9           | 13                   | 24             | 47.1                  | 323    | 36356  | 5.8  | Annexin A3                                                                                                      |
| 1117                     | Q3UBI0           | 13                   | 24             | 47.1                  | 323    | 36384  | 5.8  | Annexin A3                                                                                                      |
| 1117                     | Q3U737           | 13                   | 24             | 47.1                  | 323    | 36368  | 5.8  | Putative uncharacterized protein                                                                                |
| 1118                     | Q93092           | 13                   | 82             | 46.3                  | 337    | 37387  | 7    | Transaldolase                                                                                                   |
| 1119                     | Q9WV55           | 13                   | 61             | 44.6                  | 249    | 27855  | 8.4  | Vesicle-associated membrane protein-associated protein A                                                        |
| 1120                     | P14148           | 13                   | 45             | 44.1                  | 270    | 31420  | 10.9 | 60S ribosomal protein L7                                                                                        |
| 1120                     | Q3UBI6           | 13                   | 45             | 44.1                  | 270    | 31351  | 10.8 | Putative uncharacterized protein                                                                                |
| 1121                     | Q9QZF2           | 13                   | 28             | 38.8                  | 557    | 61360  | 7.1  | Glypican-1                                                                                                      |
| 1122                     | P70333           | 13                   | 126            | 36.1                  | 449    | 49280  | 6.3  | Heterogeneous nuclear ribonucleoprotein H2                                                                      |
| 1123                     | P05201           | 13                   | 25             | 35.4                  | 413    | 46232  | 7.2  | Aspartate aminotransferase, cytoplasmic                                                                         |
| 1124                     | P59325           | 13                   | 31             | 35.4                  | 429    | 48968  | 5.5  | Eukaryotic translation initiation factor 5                                                                      |
| 1125                     | P49182           | 13                   | 47             | 35.1                  | 478    | 54497  | 7.3  | Heparin cofactor 2                                                                                              |
| 1125                     | Q5FW62           | 13                   | 47             | 35.1                  | 478    | 54463  | 7.3  | Serine (Or cysteine) peptidase inhibitor, clade D, member 1                                                     |
| 1126                     | Q3XTX4           | 13                   | 38             | 47.5                  | 299    | 34907  | 8.4  | Putative uncharacterized protein                                                                                |
| 1126                     | Q3TJN6           | 13                   | 38             | 35.1                  | 404    | 46798  | 6.4  | Putative uncharacterized protein                                                                                |
| 1126                     | Q9D8U8           | 13                   | 38             | 35.1                  | 404    | 46797  | 6.6  | Sorting nexin-5                                                                                                 |
| 1126                     | Q8C5E7           | 13                   | 38             | 35.1                  | 404    | 46798  | 6.4  | Putative uncharacterized protein                                                                                |
| 1127                     | P97290           | 13                   | 66             | 34.7                  | 504    | 55638  | 6.4  | Plasma protease C1 inhibitor                                                                                    |
| 1128                     | Q5FW75           | 13                   | 51             | 34.6                  | 894    | 103919 | 5.5  | Actinin alpha 2                                                                                                 |
| 1129                     | E9Q4P1           | 13                   | 17             | 33.9                  | 410    | 46218  | 7.3  | Uncharacterized protein                                                                                         |
| 1129                     | Q5DTX9           | 13                   | 17             | 33.8                  | 411    | 46348  | 7.3  | MKIAA1435 protein (Fragment)                                                                                    |
| 1130                     | Q06890           | 13                   | 47             | 31.5                  | 448    | 51656  | 5.7  | Clusterin                                                                                                       |
| 1131                     | A2AAN1           | 13                   | 34             | 26.1                  | 625    | 70574  | 8.6  | Signal recognition particle 68                                                                                  |
| 1131                     | Q8BMA6           | 13                   | 34             | 26.1                  | 625    | 70622  | 8.5  | Signal recognition particle 68 kDa protein                                                                      |
| 1132                     | UPI000154AA0D    | 13                   | 34             | 21.4                  | 917    | 101873 | 6.7  | UPI000154AA0D UniRef100 entry                                                                                   |
| 1132                     | Q6GQU1           | 13                   | 34             | 21.4                  | 918    | 102302 | 6.8  | Hexokinase 1, isoform CRA_d                                                                                     |
| 1132                     | Q3TJE3           | 13                   | 34             | 21.4                  | 918    | 102279 | 6.8  | Putative uncharacterized protein                                                                                |
| 1132                     | P17710-3         | 13                   | 34             | 21.4                  | 918    | 102301 | 6.9  | Isoform HK1 of Hexokinase-1                                                                                     |
| 1132                     | D3Z2I0           | 13                   | 34             | 20.8                  | 941    | 105240 | 6.9  | Uncharacterized protein                                                                                         |
| 1132                     | UPI000154AA0B    | 13                   | 34             | 20.7                  | 945    | 105575 | 6.9  | hexokinase-1 isoform HK1-sb                                                                                     |
| 1132                     | P17710-2         | 13                   | 34             | 20.7                  | 945    | 105574 | 7    | Isoform HK1-SB of Hexokinase-1                                                                                  |
| 1132                     | P17710           | 13                   | 34             | 20.1                  | 974    | 108302 | 6.9  | Hexokinase-1                                                                                                    |
| 1132                     | E9PXQ3           | 13                   | 34             | 20.1                  | 974    | 108303 | 6.8  | Uncharacterized protein                                                                                         |
| 1133                     | Q3UXN3           | 13                   | 28             | 20.5                  | 831    | 94908  | 6.8  | Putative uncharacterized protein                                                                                |
| 1133                     | Q9ER72           | 13                   | 28             | 20.5                  | 831    | 94860  | 6.8  | Cysteinyl-tRNA synthetase, cytoplasmic                                                                          |
| 1134                     | P07742           | 13                   | 24             | 20.2                  | 792    | 90219  | 6.9  | Ribonucleoside-diphosphate reductase large subunit                                                              |
| 1134                     | Q91YM8           | 13                   | 24             | 20.2                  | 792    | 90210  | 6.7  | Ribonucleoside-diphosphate reductase                                                                            |
| 1134                     | Q6NZB3           | 13                   | 24             | 20.2                  | 792    | 90151  | 6.6  | Ribonucleoside-diphosphate reductase                                                                            |
| 1135                     | P42703-2         | 13                   | 33             | 24.8                  | 719    | 81287  | 7    | Isoform 2 of Leukemia inhibitory factor receptor                                                                |
| 1135                     | P42703           | 13                   | 33             | 16.3                  | 1092   | 122574 | 6    | Leukemia inhibitory factor receptor                                                                             |
| 1135                     | Q3U234           | 13                   | 33             | 16.3                  | 1092   | 122602 | 6    | Putative uncharacterized protein                                                                                |
| 1136                     | Q6NXK4           | 13                   | 17             | 13.4                  | 1262   | 144270 | 6.6  | Isoleucine-tRNA synthetase                                                                                      |
| 1136                     | Q8BU30           | 13                   | 17             | 13.4                  | 1262   | 144256 | 6.6  | Isoleucyl-tRNA synthetase, cytoplasmic                                                                          |
| 1137                     | E9QLA4           | 13                   | 19             | 12.6                  | 1439   | 157176 | 6.4  | Uncharacterized protein                                                                                         |
| 1137                     | Q7TQG5           | 13                   | 19             | 12.4                  | 1465   | 159967 | 6.7  | Neogenin                                                                                                        |
| 1137                     | E9QLA3           | 13                   | 19             | 12.3                  | 1481   | 161730 | 6.6  | Uncharacterized protein                                                                                         |
| 1137                     | E9QK04           | 13                   | 19             | 12.2                  | 1492   | 162919 | 6.5  | Uncharacterized protein                                                                                         |
| 1138                     | Q8BX70-2         | 13                   | 13             | 5.6                   | 3623   | 405829 | 6.6  | Isoform 2 of Vacuolar protein sorting-associated protein 13C                                                    |
| 1138                     | E9QLN1           | 13                   | 13             | 5.5                   | 3709   | 415416 | 6.8  | Uncharacterized protein                                                                                         |
| 1138                     | Q8BX70-3         | 13                   | 13             | 5.5                   | 3708   | 415303 | 6.8  | Isoform 3 of Vacuolar protein sorting-associated protein 13C                                                    |
| 1138                     | Q8BX70           | 13                   | 13             | 5.4                   | 3748   | 420092 | 6.8  | Vacuolar protein sorting-associated protein 13C                                                                 |
| 1139                     | Q9BRG1           | 13                   | 27             | 76.7                  | 176    | 20748  | 6.3  | Vacuolar protein-sorting-associated protein 25                                                                  |
| 1140                     | P00492           | 13                   | 56             | 76.1                  | 218    | 24579  | 6.7  | Hypoxanthine-guanine phosphoribosyltransferase                                                                  |
| 1140                     | Q6LET3           | 13                   | 56             | 76.1                  | 218    | 24588  | 6.8  | HPRT1 protein (Fragment)                                                                                        |
| 1141                     | P55327-2         | 13                   | 89             | 75.5                  | 184    | 19863  | 5    | Isoform 2 of Tumor protein D52                                                                                  |
| 1141                     | C9J502           | 13                   | 89             | 74.7                  | 186    | 20090  | 5    | Uncharacterized protein                                                                                         |

Table S1. Proteins identified in the OVCAR-3 tumor supernatant by two or more unique peptides.

| Protein or Group | Accession Number | Unique Peptide Count | Spectrum Count | Sequence Coverage (%) | Length | MolWt | pI  | Descriptive Name                                                                                                   |
|------------------|------------------|----------------------|----------------|-----------------------|--------|-------|-----|--------------------------------------------------------------------------------------------------------------------|
| 1141             | D3YT10           | 13                   | 89             | 67.1                  | 207    | 22474 | 5.7 | Uncharacterized protein                                                                                            |
| 1141             | P55327           | 13                   | 89             | 62.1                  | 224    | 24327 | 4.8 | Tumor protein D52                                                                                                  |
| 1141             | D0UFD3           | 13                   | 89             | 59.7                  | 233    | 25401 | 5   | Prostate leucine zipper isoform 3                                                                                  |
| 1141             | D0UFD2           | 13                   | 89             | 58.4                  | 238    | 25922 | 5   | Prostate leucine zipper variant 2                                                                                  |
| 1141             | D0UFD1           | 13                   | 89             | 56.3                  | 247    | 26941 | 5.1 | Prostate leucine zipper variant 1                                                                                  |
| 1141             | P55327-3         | 13                   | 89             | 56                    | 248    | 26382 | 6.4 | Isoform 3 of Tumor protein D52                                                                                     |
| 1142             | Q96DE0           | 13                   | 39             | 74.4                  | 195    | 21273 | 6.9 | U8 snoRNA-decapping enzyme                                                                                         |
| 1143             | Q9HOR4           | 13                   | 31             | 74.1                  | 259    | 28536 | 6.2 | Haloacid dehalogenase-like hydrolase domain-containing protein 2                                                   |
| 1144             | O00299           | 13                   | 68             | 73.9                  | 241    | 26923 | 5.2 | Chloride intracellular channel protein 1                                                                           |
| 1144             | Q53FB0           | 13                   | 68             | 73.9                  | 241    | 27015 | 5.2 | Chloride intracellular channel 1 variant (Fragment)                                                                |
| 1145             | P30039           | 13                   | 20             | 73.3                  | 288    | 31785 | 6.5 | Phenazine biosynthesis-like domain-containing protein                                                              |
| 1146             | Q59G46           | 13                   | 54             | 73.2                  | 280    | 31355 | 4.8 | Thioredoxin-like 1 variant (Fragment)                                                                              |
| 1146             | B2R960           | 13                   | 54             | 70.9                  | 289    | 32237 | 5   | cDNA_FLJ94230, highly similar to sapiens thioredoxin-like 1 (TXNL1), mRNA                                          |
| 1146             | O43396           | 13                   | 54             | 70.9                  | 289    | 32251 | 5   | Thioredoxin-like protein 1                                                                                         |
| 1147             | Q53G01           | 13                   | 49             | 70.1                  | 251    | 28179 | 6   | Chloride intracellular channel 5 variant (Fragment)                                                                |
| 1147             | Q9NZA1           | 13                   | 49             | 42.9                  | 410    | 46503 | 4.8 | Chloride intracellular channel protein 5                                                                           |
| 1148             | P09211           | 13                   | 313            | 69.5                  | 210    | 23356 | 5.6 | Glutathione S-transferase P                                                                                        |
| 1149             | Q96CN7           | 13                   | 46             | 69.5                  | 298    | 32237 | 7.4 | Isochorismatase domain-containing protein 1                                                                        |
| 1150             | P04183           | 13                   | 37             | 68.4                  | 234    | 25469 | 8.5 | Thymidine kinase, cytosolic                                                                                        |
| 1151             | A8MW68           | 13                   | 41             | 67.1                  | 286    | 33066 | 7   | Uncharacterized protein                                                                                            |
| 1151             | Q53GC7           | 13                   | 41             | 67.1                  | 286    | 32967 | 5.8 | Capping protein (Actin filament) muscle Z-line, alpha 2 variant (Fragment)                                         |
| 1151             | P47755           | 13                   | 41             | 67.1                  | 286    | 32949 | 5.8 | F-actin-capping protein subunit alpha-2                                                                            |
| 1152             | UPI0001DD3809    | 13                   | 33             | 71.3                  | 279    | 30792 | 4.4 | peroxisomal biogenesis factor 19 isoform c                                                                         |
| 1152             | P40855           | 13                   | 33             | 66.6                  | 299    | 32807 | 4.3 | Peroxisomal biogenesis factor 19                                                                                   |
| 1153             | O43399           | 13                   | 135            | 66.5                  | 206    | 22238 | 5.4 | Tumor protein D54                                                                                                  |
| 1153             | UPI0000D610E3    | 13                   | 135            | 62.6                  | 219    | 23739 | 6.2 | Tumor protein D54 (hD54) (Tumor protein D52-like 2).                                                               |
| 1153             | Q5U0E0           | 13                   | 135            | 62.3                  | 220    | 23787 | 5.7 | Tumor protein D52-like 2                                                                                           |
| 1153             | Q5JWU6           | 13                   | 135            | 59.8                  | 229    | 24854 | 6.4 | Tumor protein D52-like 2                                                                                           |
| 1154             | P41227           | 13                   | 31             | 66.4                  | 235    | 26458 | 5.6 | N-alpha-acetyltransferase 10, NatA catalytic subunit                                                               |
| 1155             | P31150           | 13                   | 32             | 63.8                  | 447    | 50583 | 5.1 | Rab GDP dissociation inhibitor alpha                                                                               |
| 1156             | P30085           | 13                   | 55             | 61.7                  | 196    | 22222 | 5.6 | UMP-CMP kinase                                                                                                     |
| 1157             | Q96GG9           | 13                   | 34             | 61.4                  | 259    | 30124 | 5.3 | DCN1-like protein 1                                                                                                |
| 1158             | P09104           | 13                   | 20             | 60.8                  | 434    | 47269 | 5   | Gamma-enolase                                                                                                      |
| 1159             | Q96GX9           | 13                   | 43             | 64.9                  | 242    | 27125 | 7.1 | Probable methylthionibulose-1-phosphate dehydratase                                                                |
| 1159             | B4DY17           | 13                   | 43             | 60.6                  | 259    | 29255 | 8.2 | cDNA_FLJ58961, highly similar to APAF1-interacting protein                                                         |
| 1160             | P09661           | 13                   | 40             | 60.4                  | 255    | 28416 | 8.6 | U2 small nuclear ribonucleoprotein A'                                                                              |
| 1161             | Q53H82           | 13                   | 32             | 59.7                  | 288    | 32806 | 6.8 | Beta-lactamase-like protein 2                                                                                      |
| 1162             | Q9GZS3           | 13                   | 31             | 59.7                  | 305    | 33581 | 5.5 | WD repeat-containing protein 61                                                                                    |
| 1163             | Q9UHD1           | 13                   | 52             | 58.7                  | 332    | 37490 | 7.9 | Cysteine and histidine-rich domain-containing protein 1                                                            |
| 1164             | O00273           | 13                   | 59             | 57.4                  | 331    | 36522 | 4.8 | DNA fragmentation factor subunit alpha                                                                             |
| 1164             | Q53HN4           | 13                   | 59             | 57.4                  | 331    | 36594 | 4.8 | DNAation factor, 45kDa, alpha polypeptide isoform 1 variant (Fragment)                                             |
| 1165             | O15305           | 13                   | 29             | 57.3                  | 246    | 28082 | 6.8 | Phosphomannomutase 2                                                                                               |
| 1166             | P53004           | 13                   | 36             | 57.1                  | 296    | 33428 | 6.4 | Biliverdin reductase A                                                                                             |
| 1167             | Q9Y315           | 13                   | 21             | 56.6                  | 318    | 35231 | 8.9 | Putative deoxyribose-phosphate aldolase                                                                            |
| 1168             | Q53F17           | 13                   | 32             | 59.6                  | 280    | 31896 | 8.2 | Four and a half LIM domains 1 variant (Fragment)                                                                   |
| 1168             | B7Z5T4           | 13                   | 32             | 56.4                  | 296    | 33579 | 8.4 | Four and a half LIM domains 1, isoform CRA_c                                                                       |
| 1168             | B7Z793           | 13                   | 32             | 54                    | 309    | 34997 | 8.3 | cDNA_FLJ55259, highly similar to Four and a half LIM domains protein 1                                             |
| 1169             | Q53FA7           | 13                   | 20             | 54.5                  | 332    | 35536 | 7.2 | Quinone oxidoreductase PIG3                                                                                        |
| 1170             | P78346           | 13                   | 23             | 63.8                  | 268    | 29321 | 8.9 | Ribonuclease P protein subunit p30                                                                                 |
| 1170             | E9PB02           | 13                   | 23             | 53.1                  | 322    | 35564 | 9.6 | Uncharacterized protein                                                                                            |
| 1171             | P07858           | 13                   | 101            | 52.8                  | 339    | 37822 | 6.3 | Cathepsin B                                                                                                        |
| 1172             | Q14192           | 13                   | 28             | 52.7                  | 279    | 32193 | 7.5 | Four and a half LIM domains protein 2                                                                              |
| 1172             | UPI00015E0A35    | 13                   | 28             | 37.8                  | 389    | 44205 | 8.1 | Four and a half LIM domains protein 2 (FHL-2) (Skeletal muscle LIM- protein 3) (SLIM 3) (LIM domain protein DRAL). |
| 1172             | Q2XQU9           | 13                   | 28             | 37.8                  | 389    | 44177 | 8.1 | FHL2 isoform 5                                                                                                     |
| 1173             | P22061           | 13                   | 43             | 66.1                  | 227    | 24636 | 7.2 | Protein-L-isoaspartate(D-aspartate) O-methyltransferase                                                            |
| 1173             | E9PAN3           | 13                   | 43             | 52.4                  | 286    | 30358 | 6.7 | Uncharacterized protein                                                                                            |
| 1174             | O75367-3         | 13                   | 33             | 52.3                  | 371    | 39489 | 9.8 | Isoform 3 of Core histone macro-H2A.1                                                                              |
| 1174             | O75367           | 13                   | 33             | 52.2                  | 372    | 39617 | 9.8 | Core histone macro-H2A.1                                                                                           |
| 1175             | P19784           | 13                   | 23             | 52                    | 350    | 41213 | 8.6 | Casein kinase II subunit alpha'                                                                                    |
| 1176             | P53367           | 13                   | 51             | 51.5                  | 373    | 41738 | 6.7 | Arfaptin-1                                                                                                         |
| 1177             | Q5VU58           | 13                   | 41             | 51.2                  | 248    | 28922 | 4.8 | Tropomyosin 3                                                                                                      |
| 1178             | Q5TDH0           | 13                   | 47             | 51.1                  | 399    | 44523 | 5   | Protein DDI1 log 2                                                                                                 |
| 1178             | Q5TDH0-3         | 13                   | 47             | 48.7                  | 419    | 46571 | 5.1 | Isoform 3 of Protein DDI1 log 2                                                                                    |
| 1179             | Q99536           | 13                   | 31             | 50.6                  | 393    | 41920 | 6.3 | Synaptic vesicle membrane protein VAT-1 log                                                                        |
| 1180             | O14908           | 13                   | 27             | 50.2                  | 333    | 36049 | 6.3 | PDZ domain-containing protein GIPC1                                                                                |
| 1181             | O75347           | 13                   | 43             | 54.6                  | 108    | 12855 | 5.3 | Tubulin-specific chaperone A                                                                                       |
| 1181             | E5RJDB           | 13                   | 43             | 49.6                  | 119    | 14306 | 5.1 | Uncharacterized protein                                                                                            |
| 1182             | Q15717           | 13                   | 63             | 52.5                  | 326    | 36092 | 9.2 | ELAV-like protein 1                                                                                                |
| 1182             | B4DVB8           | 13                   | 63             | 48.4                  | 353    | 38996 | 9.5 | cDNA_FLJ60076, highly similar to ELAV-like protein 1                                                               |
| 1183             | Q12904           | 13                   | 68             | 47.8                  | 312    | 34353 | 8.4 | Aminoacyl tRNA synthase complex-interacting multifunctional protein 1                                              |
| 1184             | B4DR80           | 13                   | 18             | 47.1                  | 412    | 45836 | 5.6 | cDNA_FLJ61159, highly similar to Serine/threonine-protein kinase 24 (EC 2.7.11.1)                                  |
| 1184             | Q5U0E6           | 13                   | 18             | 45                    | 431    | 47913 | 5.4 | Serine/threonine kinase 24 (STE20 log, yeast)                                                                      |
| 1184             | Q9Y6E0           | 13                   | 18             | 43.8                  | 443    | 49308 | 5.7 | Serine/threonine-protein kinase 24                                                                                 |
| 1184             | B4DT57           | 13                   | 18             | 43.1                  | 450    | 49998 | 5.6 | cDNA_FLJ61383, highly similar to Serine/threonine-protein kinase 24 (EC 2.7.11.1)                                  |
| 1185             | P07339           | 13                   | 63             | 46.6                  | 412    | 44552 | 6.5 | Cathepsin D                                                                                                        |
| 1186             | Q9UNE7           | 13                   | 19             | 46.5                  | 303    | 34856 | 5.9 | E3 ubiquitin-protein ligase CHIP                                                                                   |
| 1187             | Q14847           | 13                   | 115            | 56.3                  | 261    | 29717 | 7   | LIM and SH3 domain protein 1                                                                                       |
| 1187             | C9JVR8           | 13                   | 115            | 46.2                  | 318    | 35446 | 8.5 | Uncharacterized protein                                                                                            |
| 1187             | Q14847-2         | 13                   | 115            | 45.5                  | 323    | 36014 | 8.6 | Isoform 2 of LIM and SH3 domain protein 1                                                                          |
| 1188             | Q96KB5           | 13                   | 22             | 46                    | 322    | 36085 | 5.1 | Lymphokine-activated killer T-cell-originated protein kinase                                                       |
| 1188             | B4DX68           | 13                   | 22             | 44.4                  | 333    | 37211 | 5.1 | cDNA_FLJ58333, highly similar to T-lymphokine-activated killer cell-originated protein kinase (EC 2.7.12.2)        |
| 1189             | Q9UL15           | 13                   | 23             | 43.8                  | 447    | 51200 | 6   | BAG family molecular chaperone regulator 5                                                                         |
| 1190             | P18031           | 13                   | 34             | 43.4                  | 435    | 49967 | 6.3 | Tyrosine-protein phosphatase non-receptor type 1                                                                   |
| 1191             | P29218           | 13                   | 30             | 51.6                  | 277    | 30189 | 5.3 | Inositol monophosphatase 1                                                                                         |
| 1191             | B7Z6Q4           | 13                   | 30             | 42.6                  | 336    | 36723 | 8.1 | cDNA_FLJ54837, highly similar to Inositol monophosphatase (EC 3.1.3.25)                                            |
| 1191             | UPI000192950E    | 13                   | 30             | 42.6                  | 336    | 36695 | 7.9 | inositol monophosphatase 1 isoform 2                                                                               |
| 1192             | Q16543           | 13                   | 76             | 41.3                  | 378    | 44468 | 5.2 | Hsp90 co-chaperone Cdc37                                                                                           |
| 1193             | E7EVX8           | 13                   | 45             | 40.4                  | 493    | 54766 | 5.8 | Uncharacterized protein                                                                                            |
| 1193             | Q8WVY3           | 13                   | 45             | 39.9                  | 499    | 55456 | 5.8 | U4/U6 small nuclear ribonucleoprotein Prp31                                                                        |
| 1194             | Q9H3P7           | 13                   | 40             | 40.2                  | 528    | 60593 | 5.1 | Golgi resident protein GCP60                                                                                       |
| 1195             | B7Z254           | 13                   | 41             | 43.2                  | 437    | 47838 | 5.1 | cDNA_FLJ58502, highly similar to Protein disulfide-isomerase A6 (EC 5.3.4.1)                                       |

Table S1. Proteins identified in the OVCAR-3 tumor supernatant by two or more unique peptides.

| Protein or Protein Group | Accession Number | Unique Peptide Count | Spectrum Count | Sequence Coverage (%) | Length | MolWt  | pI  | Descriptive Name                                                                                                         |
|--------------------------|------------------|----------------------|----------------|-----------------------|--------|--------|-----|--------------------------------------------------------------------------------------------------------------------------|
| 1195                     | Q15084           | 13                   | 41             | 43                    | 440    | 48121  | 5.1 | Protein disulfide-isomerase A6                                                                                           |
| 1195                     | B7Z4M8           | 13                   | 41             | 42.5                  | 445    | 48701  | 5.2 | cDNA FLJ58023, highly similar to Protein disulfide-isomerase A6 (EC 5.3.4.1)                                             |
| 1195                     | B5MBW7           | 13                   | 41             | 42.5                  | 445    | 48646  | 5.1 | Uncharacterized protein                                                                                                  |
| 1195                     | B3KY95           | 13                   | 41             | 38.7                  | 488    | 53289  | 5.5 | cDNA FLJ16143 fis, clone BRAMY2038516, highly similar to Protein disulfide-isomerase A6 (EC 5.3.4.1)                     |
| 1196                     | P30419           | 13                   | 42             | 38.7                  | 496    | 56806  | 7.8 | Glycopeptide N-tetradecanoyltransferase 1                                                                                |
| 1197                     | Q15942           | 13                   | 33             | 38.1                  | 572    | 61277  | 6.7 | Zyxin                                                                                                                    |
| 1198                     | Q9UBB4           | 13                   | 25             | 37.9                  | 475    | 53489  | 5.2 | Ataxin-10                                                                                                                |
| 1199                     | P49354           | 13                   | 33             | 44.3                  | 379    | 44409  | 5.1 | Protein farnesyltransferase/geranylgeranyltransferase type-1 subunit alpha                                               |
| 1199                     | D3DSY9           | 13                   | 33             | 36.8                  | 457    | 52610  | 5.6 | Farnesyltransferase, CAAX box, alpha, isoform CRA_a                                                                      |
| 1200                     | B2RDR4           | 13                   | 28             | 36.6                  | 421    | 47966  | 7.7 | cDNA FLJ96732, highly similar to sapiens testis derived transcript (3 LIM domains) (TES), transcript variant 1, mRNA     |
| 1200                     | Q9UGI8           | 13                   | 28             | 36.6                  | 421    | 47996  | 7.7 | Testin                                                                                                                   |
| 1201                     | B7Z7F3           | 13                   | 27             | 36                    | 494    | 52895  | 4.8 | cDNA FLJ58549, highly similar to Ran-binding protein 3                                                                   |
| 1201                     | Q9H6Z4-2         | 13                   | 27             | 31.7                  | 562    | 59694  | 4.8 | Isoform 2 of Ran-binding protein 3                                                                                       |
| 1202                     | P16930           | 13                   | 22             | 35.8                  | 419    | 46374  | 6.9 | Fumarylacetoacetase                                                                                                      |
| 1203                     | P17812           | 13                   | 40             | 35.4                  | 591    | 66690  | 6.5 | CTP synthase 1                                                                                                           |
| 1204                     | P12931           | 13                   | 20             | 32.5                  | 536    | 59835  | 7.4 | Proto-oncogene tyrosine-protein kinase Src                                                                               |
| 1204                     | P12931-2         | 13                   | 20             | 32.1                  | 542    | 60589  | 7.8 | Isoform 2 of Proto-oncogene tyrosine-protein kinase Src                                                                  |
| 1205                     | B4DEP6           | 13                   | 184            | 32.4                  | 587    | 66128  | 5.7 | cDNA FLJ59206, highly similar to Eukaryotic translation initiation factor 4B                                             |
| 1205                     | E7EPC9           | 13                   | 184            | 32.4                  | 587    | 66113  | 5.7 | Uncharacterized protein                                                                                                  |
| 1205                     | P23588           | 13                   | 184            | 31.1                  | 611    | 69151  | 5.7 | Eukaryotic translation initiation factor 4B                                                                              |
| 1205                     | E7EX17           | 13                   | 184            | 30.8                  | 616    | 69698  | 5.7 | Uncharacterized protein                                                                                                  |
| 1205                     | B4DRM3           | 13                   | 184            | 30.8                  | 616    | 69726  | 5.7 | cDNA FLJ54492, highly similar to Eukaryotic translation initiation factor 4B                                             |
| 1206                     | Q15642-4         | 13                   | 24             | 41.7                  | 456    | 52700  | 6.8 | Isoform 4 of Cdc42-interacting protein 4                                                                                 |
| 1206                     | Q15642-2         | 13                   | 24             | 34.9                  | 545    | 62592  | 5.3 | Isoform 2 of Cdc42-interacting protein 4                                                                                 |
| 1206                     | UPI000059D64B    | 13                   | 24             | 32                    | 593    | 67731  | 6.1 | UPI000059D64B UniRef100 entry                                                                                            |
| 1206                     | Q15642-3         | 13                   | 24             | 32                    | 593    | 67603  | 6.2 | Isoform 3 of Cdc42-interacting protein 4                                                                                 |
| 1206                     | Q15642           | 13                   | 24             | 31.6                  | 601    | 68352  | 5.7 | Cdc42-interacting protein 4                                                                                              |
| 1207                     | P07686           | 13                   | 27             | 31.1                  | 556    | 63111  | 6.8 | Beta-hexosaminidase subunit beta                                                                                         |
| 1208                     | Q96RS6           | 13                   | 20             | 30.9                  | 583    | 66756  | 5.1 | NudC domain-containing protein 1                                                                                         |
| 1209                     | Q05BV5           | 13                   | 36             | 30.2                  | 660    | 71801  | 7   | OGFR protein                                                                                                             |
| 1210                     | Q9UBF2           | 13                   | 32             | 29.6                  | 871    | 97622  | 5.8 | Coatomer subunit gamma-2                                                                                                 |
| 1211                     | UPI00015DFD4A    | 13                   | 30             | 32.4                  | 574    | 65012  | 6   | Sec1 family domain-containing protein 1 (Syntaxin-binding protein 1-like 2) (Sly1p)                                      |
| 1211                     | B7Z4U7           | 13                   | 30             | 32.3                  | 575    | 65061  | 5.8 | Sec1 family domain containing 1, isoform CRA_b                                                                           |
| 1211                     | B7Z738           | 13                   | 30             | 31.9                  | 583    | 66046  | 5.8 | cDNA FLJ57213, highly similar to Sec1 family domain-containing protein 1                                                 |
| 1211                     | A8MVJ7           | 13                   | 30             | 29                    | 642    | 72378  | 6.3 | Uncharacterized protein                                                                                                  |
| 1211                     | Q8WVM8           | 13                   | 30             | 29                    | 642    | 72380  | 6.3 | Sec1 family domain-containing protein 1                                                                                  |
| 1211                     | Q53GW1           | 13                   | 30             | 29                    | 642    | 72308  | 6.4 | Vesicle transport-related protein isoform a variant (Fragment)                                                           |
| 1212                     | Q9Y6M1-1         | 13                   | 22             | 31.3                  | 556    | 61843  | 8.3 | Isoform 2 of Insulin-like growth factor 2 mRNA-binding protein 2                                                         |
| 1212                     | Q9Y6M1           | 13                   | 22             | 29                    | 599    | 66121  | 8.5 | Insulin-like growth factor 2 mRNA-binding protein 2                                                                      |
| 1213                     | Q96GF2           | 13                   | 28             | 29.1                  | 633    | 68448  | 5.3 | GSPT1 protein                                                                                                            |
| 1213                     | E7EQZ3           | 13                   | 28             | 28.9                  | 636    | 68601  | 5.3 | Uncharacterized protein                                                                                                  |
| 1213                     | UPI0000EE662A    | 13                   | 28             | 28.9                  | 637    | 68672  | 5.3 | eukaryotic peptide chain release factor GTP-binding subunit ERF3A isoform 1                                              |
| 1213                     | UPI0000EE6629    | 13                   | 28             | 28.9                  | 636    | 68573  | 5.3 | eukaryotic peptide chain release factor GTP-binding subunit ERF3A isoform 2                                              |
| 1213                     | UPI000049DE01    | 13                   | 28             | 28.9                  | 637    | 68700  | 5.3 | UPI000049DE01 UniRef100 entry                                                                                            |
| 1214                     | Q9H6S3           | 13                   | 31             | 27.3                  | 715    | 80621  | 6.8 | Epidermal growth factor receptor kinase substrate 8-like protein 2                                                       |
| 1214                     | B7ZKL3           | 13                   | 31             | 26.7                  | 731    | 82323  | 7   | EPSB2 protein                                                                                                            |
| 1215                     | Q13421-4         | 13                   | 55             | 27.2                  | 621    | 67941  | 6.2 | Isoform 4 of Mesothelin                                                                                                  |
| 1215                     | Q13421-3         | 13                   | 55             | 27.2                  | 622    | 68070  | 6   | Isoform 2 of Mesothelin                                                                                                  |
| 1215                     | C9J1E9           | 13                   | 55             | 25.8                  | 656    | 71524  | 7.4 | Uncharacterized protein                                                                                                  |
| 1215                     | Q13421-2         | 13                   | 55             | 25.8                  | 656    | 71492  | 7.4 | Isoform 3 of Mesothelin                                                                                                  |
| 1216                     | Q14444-2         | 13                   | 136            | 26.1                  | 694    | 76862  | 5.1 | Isoform 2 of Caprin-1                                                                                                    |
| 1216                     | Q14444           | 13                   | 136            | 25.5                  | 709    | 78366  | 5.2 | Caprin-1                                                                                                                 |
| 1217                     | UPI0001AE6845    | 13                   | 45             | 23.4                  | 849    | 93864  | 4.7 | UPI0001AE6845 UniRef100 entry                                                                                            |
| 1218                     | P18858           | 13                   | 22             | 20.7                  | 919    | 101736 | 5.6 | DNA ligase 1                                                                                                             |
| 1219                     | Q96A65           | 13                   | 22             | 19.6                  | 974    | 110498 | 6.5 | Exocyst complex component 4                                                                                              |
| 1220                     | Q8WX93-4         | 13                   | 35             | 21.4                  | 672    | 73322  | 7.7 | Isoform 4 of Palladin                                                                                                    |
| 1220                     | B3KTG2           | 13                   | 35             | 18.5                  | 777    | 85894  | 6.9 | cDNA FLJ38193 fis, clone FCBBF1000280, highly similar to sapiens palladin, cytoskeletal associated protein (PALLD), mRNA |
| 1220                     | Q8WX93-3         | 13                   | 35             | 14.4                  | 1001   | 108631 | 7.3 | Isoform 3 of Palladin                                                                                                    |
| 1220                     | Q8WX93-5         | 13                   | 35             | 12.4                  | 1159   | 127826 | 6.9 | Isoform 5 of Palladin                                                                                                    |
| 1220                     | Q8WX93           | 13                   | 35             | 10.4                  | 1383   | 150564 | 7.1 | Palladin                                                                                                                 |
| 1221                     | Q9NYF8           | 13                   | 57             | 18.3                  | 920    | 106122 | 10  | Bcl-2-associated transcription factor 1                                                                                  |
| 1221                     | Q9NYF8-2         | 13                   | 57             | 18.3                  | 918    | 105948 | 10  | Isoform 2 of Bcl-2-associated transcription factor 1                                                                     |
| 1222                     | B4E3I7           | 13                   | 27             | 17.7                  | 986    | 110732 | 5.3 | cDNA FLJ56396, highly similar to Huntingtin-interacting protein 1                                                        |
| 1222                     | E7ES17           | 13                   | 27             | 17.7                  | 986    | 110663 | 5.3 | Uncharacterized protein                                                                                                  |
| 1222                     | O00291           | 13                   | 27             | 16.9                  | 1037   | 116221 | 5.3 | Huntingtin-interacting protein 1                                                                                         |
| 1223                     | B7ZLP5           | 13                   | 68             | 17                    | 914    | 102581 | 5.4 | SAFB protein                                                                                                             |
| 1223                     | A0AV56           | 13                   | 68             | 16.9                  | 917    | 102855 | 5.5 | SAFB protein                                                                                                             |
| 1223                     | Q15424           | 13                   | 68             | 16.9                  | 915    | 102642 | 5.5 | Scaffold attachment factor B1                                                                                            |
| 1223                     | B7ZLP6           | 13                   | 68             | 16.9                  | 916    | 102768 | 5.5 | SAFB protein                                                                                                             |
| 1223                     | A8K329           | 13                   | 68             | 16.9                  | 916    | 102754 | 5.4 | cDNA FLJ76656, highly similar to sapiens scaffold attachment factor B (SAFB), mRNA                                       |
| 1224                     | Q8WWM7           | 13                   | 27             | 16.2                  | 1075   | 113374 | 8.6 | Ataxin-2-like protein                                                                                                    |
| 1225                     | Q14617-5         | 13                   | 13             | 13.7                  | 1215   | 136651 | 7.6 | Isoform 5 of AP-3 complex subunit delta-1                                                                                |
| 1226                     | Q8IX12-2         | 13                   | 51             | 13.8                  | 1135   | 131043 | 5.8 | Isoform 2 of Cell division cycle and apoptosis regulator protein 1                                                       |
| 1226                     | Q8IX12           | 13                   | 51             | 13.7                  | 1150   | 132821 | 5.8 | Cell division cycle and apoptosis regulator protein 1                                                                    |
| 1227                     | Q14160           | 13                   | 34             | 12.5                  | 1630   | 174884 | 5.1 | Protein scribble log                                                                                                     |
| 1227                     | E7EMI2           | 13                   | 34             | 12.3                  | 1654   | 177194 | 5.1 | Uncharacterized protein                                                                                                  |
| 1227                     | UPI000035199C    | 13                   | 34             | 12.3                  | 1655   | 177739 | 5.1 | protein scribble log isoform a                                                                                           |
| 1227                     | Q14160-3         | 13                   | 34             | 12.3                  | 1655   | 177693 | 5.1 | Isoform 3 of Protein scribble log                                                                                        |
| 1228                     | P52701           | 13                   | 25             | 11.8                  | 1360   | 152785 | 6.9 | DNA mismatch repair protein Msh6                                                                                         |
| 1229                     | Q95602           | 13                   | 13             | 11.2                  | 1720   | 194810 | 7   | DNA-directed RNA polymerase I subunit RPA1                                                                               |
| 1230                     | Q7Z460-2         | 13                   | 36             | 10.3                  | 1471   | 162110 | 8.8 | Isoform 2 of CLIP-associating protein 1                                                                                  |
| 1230                     | E7EUA5           | 13                   | 36             | 10.3                  | 1471   | 162067 | 8.8 | Uncharacterized protein                                                                                                  |
| 1230                     | A2RU21           | 13                   | 36             | 10.2                  | 1479   | 162914 | 8.8 | CLASP1 protein                                                                                                           |
| 1230                     | B7ZLX3           | 13                   | 36             | 10.2                  | 1477   | 163061 | 8.5 | CLASP1 protein                                                                                                           |
| 1230                     | Q7Z460-3         | 13                   | 36             | 10.1                  | 1494   | 164565 | 8.5 | Isoform 3 of CLIP-associating protein 1                                                                                  |
| 1230                     | Q7Z460           | 13                   | 36             | 9.8                   | 1538   | 169450 | 9   | CLIP-associating protein 1                                                                                               |
| 1231                     | Q69YN4-3         | 13                   | 25             | 9.6                   | 1797   | 201055 | 4.8 | Isoform 3 of Protein virilizer log                                                                                       |
| 1231                     | Q69YN4           | 13                   | 25             | 9.5                   | 1812   | 202023 | 5   | Protein virilizer log                                                                                                    |
| 1232                     | Q6ZNU1           | 13                   | 27             | 8.4                   | 2754   | 302515 | 6.4 | Neurobeachin-like protein 2                                                                                              |



Table S1. Proteins identified in the OVCAR-3 tumor supernatant by two or more unique peptides.

| Protein or Group | Accession Number | Unique Peptide Count | Spectrum Count | Sequence Coverage (%) | Length | MolWt  | pI   | Descriptive Name                                                                                         |
|------------------|------------------|----------------------|----------------|-----------------------|--------|--------|------|----------------------------------------------------------------------------------------------------------|
| 1233             | D3DUP2           | 13                   | 40             | 7.2                   | 2107   | 222701 | 6.4  | WNK lysine deficient protein kinase 1, isoform CRA_d                                                     |
| 1233             | UPI0001D411C5    | 13                   | 40             | 7.1                   | 2134   | 225501 | 6.4  | serine/threonine-protein kinase WNK1 isoform 2                                                           |
| 1233             | Q9H4A3-2         | 13                   | 40             | 7.1                   | 2135   | 225558 | 6.4  | Isoform 2 of Serine/threonine-protein kinase WNK1                                                        |
| 1233             | D3DUP1           | 13                   | 40             | 6.3                   | 2382   | 250753 | 6.3  | WNK lysine deficient protein kinase 1, isoform CRA_b                                                     |
| 1233             | Q9H4A3           | 13                   | 40             | 6.3                   | 2382   | 250791 | 6.3  | Serine/threonine-protein kinase WNK1                                                                     |
| 1233             | Q9H4A3-6         | 13                   | 40             | 5.7                   | 2642   | 279711 | 6.3  | Isoform 5 of Serine/threonine-protein kinase WNK1                                                        |
| 1233             | Q9H4A3-5         | 13                   | 40             | 5.7                   | 2634   | 279535 | 6.5  | Isoform 4 of Serine/threonine-protein kinase WNK1                                                        |
| 1234             | Q15365           | 12                   | 169            | 71.9                  | 356    | 37498  | 7.1  | Poly(rC)-binding protein 1 Poly(rC)-binding protein 1                                                    |
| 1235             | B5MCE8           | 12                   | 27             | 69.1                  | 278    | 31704  | 8.2  | Uncharacterized protein                                                                                  |
| 1235             | Q1JQB2           | 12                   | 27             | 58.9                  | 326    | 36955  | 6.8  | Mitotic checkpoint protein BUB3 Mitotic checkpoint protein BUB3                                          |
| 1235             | O43684           | 12                   | 27             | 58.5                  | 328    | 37155  | 6.8  | Mitotic checkpoint protein BUB3                                                                          |
| 1236             | P35293           | 12                   | 48             | 67                    | 206    | 23035  | 5.4  | Ras-related protein Rab-18                                                                               |
| 1236             | Q9NPF2           | 12                   | 48             | 67                    | 206    | 22977  | 5.2  | Ras-related protein Rab-18<br>cDNA FLJ61189, highly similar to Cysteine and glycine-rich protein 1       |
| 1237             | B4DY28           | 12                   | 195            | 66.8                  | 187    | 20042  | 8.5  | 1                                                                                                        |
| 1237             | P97315           | 12                   | 195            | 64.8                  | 193    | 20583  | 8.6  | Cysteine and glycine-rich protein 1                                                                      |
| 1237             | P21291           | 12                   | 195            | 64.8                  | 193    | 20567  | 8.6  | Cysteine and glycine-rich protein 1                                                                      |
| 1238             | P53994           | 12                   | 135            | 64.2                  | 212    | 23548  | 6.5  | Ras-related protein Rab-2A                                                                               |
| 1238             | P61019           | 12                   | 135            | 64.2                  | 212    | 23546  | 6.5  | Ras-related protein Rab-2A                                                                               |
| 1239             | Q9D3C4           | 12                   | 136            | 69                    | 168    | 19653  | 8.4  | Putative uncharacterized protein                                                                         |
| 1239             | Q7TPD9           | 12                   | 136            | 69                    | 168    | 19607  | 8.4  | Arpc4 protein                                                                                            |
| 1239             | P59998           | 12                   | 136            | 69                    | 168    | 19667  | 8.4  | 2/3 complex subunit 4 Actin-related protein                                                              |
| 1239             | UPI000198C8E6    | 12                   | 136            | 64.1                  | 181    | 21059  | 8.8  | UPI000198C8E6 UniRef100 entry                                                                            |
| 1239             | C9JWM7           | 12                   | 136            | 62                    | 187    | 21588  | 8.6  | Uncharacterized protein<br>Proteasome activator complex subunit 3 Proteasome activator complex subunit 3 |
| 1240             | P61289           | 12                   | 74             | 60.6                  | 254    | 29506  | 6    | Isoform 2 of Proteasome activator complex subunit 3                                                      |
| 1240             | P61289-2         | 12                   | 74             | 57.7                  | 267    | 30887  | 6.1  | Isoform 2 of Proteasome activator complex subunit 3                                                      |
| 1241             | P83916           | 12                   | 145            | 60.5                  | 185    | 21418  | 4.9  | Chromobox protein log 1 Chromobox protein log 1                                                          |
| 1241             | E9PCS5           | 12                   | 145            | 59.3                  | 189    | 21915  | 4.9  | Uncharacterized protein                                                                                  |
| 1242             | D3YWT1           | 12                   | 129            | 57.1                  | 331    | 35182  | 6.9  | MCG11326, isoform CRA_b                                                                                  |
| 1242             | P31942-2         | 12                   | 129            | 57.1                  | 331    | 35239  | 6.9  | Isoform 2 of Heterogeneous nuclear ribonucleoprotein H3                                                  |
| 1242             | P31942           | 12                   | 129            | 54.6                  | 346    | 36926  | 6.9  | Heterogeneous nuclear ribonucleoprotein H3                                                               |
| 1242             | D3Z3N4           | 12                   | 129            | 54.6                  | 346    | 36869  | 6.9  | MCG11326, isoform CRA_a                                                                                  |
| 1243             | P62917           | 12                   | 138            | 52.9                  | 257    | 28025  | 11   | 60S ribosomal protein L8 60S ribosomal protein L8                                                        |
| 1243             | Q3UJ50           | 12                   | 138            | 52.9                  | 257    | 28067  | 11   | Putative uncharacterized protein                                                                         |
| 1244             | D3YWP3           | 12                   | 135            | 49.4                  | 156    | 17698  | 10.4 | MCG103428                                                                                                |
| 1244             | UPI0000026315    | 12                   | 135            | 49.4                  | 156    | 17725  | 10.3 | PREDICTED: 60S ribosomal protein L23a-like                                                               |
| 1244             | P62750           | 12                   | 135            | 49.4                  | 156    | 17695  | 10.4 | 60S ribosomal protein L23a 60S ribosomal protein L23a                                                    |
| 1245             | P31153           | 12                   | 28             | 48.1                  | 395    | 43661  | 6.5  | S-adenosylmethionine synthase isoform type-2                                                             |
| 1245             | Q3THS6           | 12                   | 28             | 48.1                  | 395    | 43689  | 6.5  | S-adenosylmethionine synthase isoform type-2                                                             |
| 1246             | Q6UXN9           | 12                   | 45             | 45.7                  | 313    | 35079  | 7.7  | WD repeat-containing protein 82 WD repeat-containing protein 82                                          |
| 1247             | Q96BS4           | 12                   | 27             | 55.8                  | 260    | 28449  | 9.4  | FBL protein (Fragment)                                                                                   |
| 1247             | P22087           | 12                   | 27             | 45.2                  | 321    | 33784  | 10.2 | rRNA 2'-O-methyltransferase fibrillar                                                                    |
| 1247             | Q3UJ52           | 12                   | 27             | 44.3                  | 327    | 34376  | 10.3 | Putative uncharacterized protein                                                                         |
| 1247             | P35550           | 12                   | 27             | 44.3                  | 327    | 34307  | 10.2 | rRNA 2'-O-methyltransferase fibrillar                                                                    |
| 1248             | E9PWH9           | 12                   | 50             | 43.1                  | 204    | 24127  | 11.6 | Uncharacterized protein                                                                                  |
| 1248             | Q3U7D2           | 12                   | 50             | 43.1                  | 204    | 24146  | 11.6 | Ribosomal protein L15                                                                                    |
| 1248             | P61313           | 12                   | 50             | 43.1                  | 204    | 24146  | 11.6 | 60S ribosomal protein L15 60S ribosomal protein L15                                                      |
| 1248             | E9QA22           | 12                   | 50             | 43.1                  | 204    | 24077  | 11.6 | Uncharacterized protein                                                                                  |
| 1249             | P61759           | 12                   | 37             | 50.5                  | 196    | 22436  | 6.3  | Prefoldin subunit 3                                                                                      |
| 1249             | P61758           | 12                   | 37             | 50.3                  | 197    | 22658  | 7.1  | Prefoldin subunit 3                                                                                      |
| 1249             | D3DWW7           | 12                   | 37             | 42.5                  | 233    | 26535  | 9    | von Hippel-Lindau binding protein 1, isoform CRA_b                                                       |
| 1250             | D3YYL9           | 12                   | 292            | 41.6                  | 317    | 34226  | 8.8  | Uncharacterized protein                                                                                  |
| 1250             | Q6P6I7           | 12                   | 292            | 41.5                  | 318    | 34377  | 9    | Hnrpa3 protein                                                                                           |
| 1250             | E7ERJ4           | 12                   | 292            | 41.5                  | 318    | 34476  | 9.1  | Uncharacterized protein Uncharacterized protein                                                          |
| 1250             | E7EN79           | 12                   | 292            | 38.4                  | 344    | 36668  | 9    | Uncharacterized protein                                                                                  |
| 1250             | UPI0001E6B716    | 12                   | 292            | 36.5                  | 362    | 39298  | 9    | PREDICTED: heterogeneous nuclear ribonucleoprotein A3-like                                               |
| 1250             | P51991           | 12                   | 292            | 34.9                  | 378    | 39595  | 9    | Heterogeneous nuclear ribonucleoprotein A3                                                               |
| 1250             | Q8BG05           | 12                   | 292            | 34.8                  | 379    | 39652  | 9    | Heterogeneous nuclear ribonucleoprotein A3                                                               |
| 1250             | Q3UZG3           | 12                   | 292            | 34.8                  | 379    | 39751  | 9.1  | Putative uncharacterized protein                                                                         |
| 1251             | B7U582           | 12                   | 173            | 26.2                  | 633    | 69724  | 5.7  | Heat shock protein 70-2                                                                                  |
| 1251             | P14659           | 12                   | 173            | 26.2                  | 633    | 69642  | 5.7  | Heat shock-related 70 kDa protein 2                                                                      |
| 1251             | P54652           | 12                   | 173            | 26                    | 639    | 70021  | 5.7  | Heat shock-related 70 kDa protein 2                                                                      |
| 1252             | B2RY56-2         | 12                   | 53             | 19                    | 838    | 99552  | 6.3  | Isoform 2 of RNA-binding protein 25                                                                      |
| 1252             | B2RY56           | 12                   | 53             | 18.9                  | 841    | 99926  | 6.4  | RNA-binding protein 25                                                                                   |
| 1252             | P49756           | 12                   | 53             | 18.9                  | 843    | 100186 | 6.3  | RNA-binding protein 25                                                                                   |
| 1253             | Q9R1P3           | 12                   | 50             | 76.1                  | 201    | 22906  | 7    | Proteasome subunit beta type-2                                                                           |
| 1254             | Q9R0P5           | 12                   | 83             | 69.1                  | 165    | 18522  | 8    | Destrin                                                                                                  |
| 1255             | P00920           | 12                   | 42             | 68.1                  | 260    | 29033  | 7    | Carbonic anhydrase 2                                                                                     |
| 1256             | P47754           | 12                   | 34             | 67.1                  | 286    | 32967  | 5.8  | F-actin-capping protein subunit alpha-2                                                                  |
| 1257             | O08547           | 12                   | 120            | 66.5                  | 215    | 24741  | 8.5  | Vesicle-trafficking protein SEC22b                                                                       |
| 1258             | Q61171           | 12                   | 59             | 65.7                  | 198    | 21779  | 5.4  | Peroxiredoxin-2                                                                                          |
| 1259             | Q99LD8           | 12                   | 33             | 65.6                  | 285    | 29646  | 6    | N(G),N(G)-dimethylarginine dimethylaminohydrolase 2                                                      |
| 1260             | E9QNF4           | 12                   | 44             | 64.3                  | 168    | 19343  | 8.6  | Uncharacterized protein                                                                                  |
| 1260             | Q6PGB6-2         | 12                   | 44             | 64.3                  | 168    | 19327  | 8.8  | Isoform 2 of N-alpha-acetyltransferase 50, NatE catalytic subunit                                        |
| 1260             | Q6PGB6           | 12                   | 44             | 63.9                  | 169    | 19414  | 8.8  | N-alpha-acetyltransferase 50, NatE catalytic subunit                                                     |
| 1260             | Q6PGB6-4         | 12                   | 44             | 61.7                  | 175    | 20044  | 8.4  | Isoform 4 of N-alpha-acetyltransferase 50, NatE catalytic subunit                                        |
| 1261             | Q9C065           | 12                   | 38             | 56.2                  | 283    | 31062  | 7.1  | S-methyl-5'-thioadenosine phosphorylase                                                                  |
| 1262             | P17918           | 12                   | 37             | 53.3                  | 261    | 28785  | 4.8  | Proliferating cell nuclear antigen                                                                       |
| 1262             | Q91ZH2           | 12                   | 37             | 53.3                  | 261    | 28845  | 4.8  | Proliferating cell nuclear antigen                                                                       |
| 1263             | E9Q450           | 12                   | 35             | 52.5                  | 284    | 32848  | 4.8  | Uncharacterized protein                                                                                  |
| 1264             | P08249           | 12                   | 25             | 49.4                  | 338    | 35611  | 8.7  | Malate dehydrogenase, mitochondrial                                                                      |
| 1265             | O70433           | 12                   | 26             | 48                    | 279    | 32073  | 7.3  | Four and a half LIM domains protein 2                                                                    |
| 1265             | Q8VDP9           | 12                   | 26             | 48                    | 279    | 32057  | 7.3  | Four and a half LIM domains 2                                                                            |
| 1266             | O70250           | 12                   | 34             | 47.8                  | 253    | 28827  | 8.5  | Phosphoglycerate mutase 2                                                                                |
| 1267             | O55215           | 12                   | 90             | 55.2                  | 250    | 27231  | 9.6  | Ribosomal protein S2                                                                                     |
| 1267             | E9PV46           | 12                   | 90             | 47.1                  | 293    | 31169  | 10.1 | Uncharacterized protein                                                                                  |
| 1267             | Q3TXS9           | 12                   | 90             | 47.1                  | 293    | 31188  | 10.2 | Putative uncharacterized protein                                                                         |
| 1267             | P25444           | 12                   | 90             | 47.1                  | 293    | 31231  | 10.2 | 40S ribosomal protein S2                                                                                 |
| 1268             | O70435           | 12                   | 32             | 43.9                  | 255    | 28405  | 5.4  | Proteasome subunit alpha type-3                                                                          |
| 1268             | Q9DCD8           | 12                   | 32             | 43.9                  | 255    | 28490  | 5.6  | Proteasome subunit alpha type                                                                            |
| 1269             | Q3U3T6           | 12                   | 18             | 42.5                  | 431    | 47955  | 5.3  | Putative uncharacterized protein                                                                         |
| 1269             | Q99KH8           | 12                   | 18             | 42.5                  | 431    | 47954  | 5.4  | Serine/threonine-protein kinase 24                                                                       |
| 1270             | Q91WQ0           | 12                   | 49             | 38                    | 397    | 44735  | 5.2  | Serine (Or cysteine) peptidase inhibitor, clade A, member 6                                              |
| 1271             | P47911           | 12                   | 47             | 35.1                  | 296    | 33510  | 10.7 | 60S ribosomal protein L6                                                                                 |
| 1271             | UPI000024FB1D    | 12                   | 47             | 35.1                  | 296    | 33482  | 10.6 | PREDICTED: 60S ribosomal protein L6-like                                                                 |
| 1272             | Q8CHH9-2         | 12                   | 19             | 34                    | 430    | 49974  | 6.1  | Isoform 2 of Septin-8                                                                                    |
| 1272             | Q8CHH9           | 12                   | 19             | 34                    | 429    | 49812  | 6    | Septin-8                                                                                                 |
| 1272             | B7ZC46           | 12                   | 19             | 33.2                  | 440    | 50896  | 6.1  | Septin 8                                                                                                 |
| 1272             | B1AQY9           | 12                   | 19             | 33                    | 442    | 51146  | 6.1  | Septin 8                                                                                                 |
| 1273             | Q9DBC7           | 12                   | 19             | 31                    | 381    | 43185  | 5.3  | cAMP-dependent protein kinase type I-alpha regulatory subunit                                            |
| 1273             | Q3TYK4           | 12                   | 19             | 23.1                  | 510    | 57281  | 6.9  | Putative uncharacterized protein                                                                         |

Table S1. Proteins identified in the OVCAR-3 tumor supernatant by two or more unique peptides.

| Protein or Group | Accession Number | Unique Peptide Count | Spectrum Count | Sequence Coverage (%) | Length | MolWt  | pI  | Descriptive Name                                                                                                        |
|------------------|------------------|----------------------|----------------|-----------------------|--------|--------|-----|-------------------------------------------------------------------------------------------------------------------------|
| 1274             | Q3UCD0           | 12                   | 59             | 22.2                  | 591    | 63299  | 8.2 | Putative uncharacterized protein                                                                                        |
| 1274             | Q8C151           | 12                   | 59             | 22.2                  | 591    | 63329  | 8.2 | PDZ and LIM domain protein 5                                                                                            |
| 1275             | Q62029           | 12                   | 111            | 19.4                  | 628    | 69061  | 8.8 | Poly A binding protein, cytoplasmic 2                                                                                   |
| 1276             | Q9JKR6           | 12                   | 17             | 19.4                  | 999    | 111181 | 5.2 | Hypoxia up-regulated protein 1                                                                                          |
| 1277             | Q7TNZ4           | 12                   | 14             | 16.6                  | 842    | 93587  | 7   | Glycosylphosphatidylinositol-specific phospholipase D                                                                   |
| 1277             | Q8VCU2           | 12                   | 14             | 16.6                  | 842    | 93624  | 6.8 | Glycosylphosphatidylinositol specific phospholipase D1                                                                  |
| 1277             | Q8R432           | 12                   | 14             | 16.6                  | 842    | 93654  | 6.7 | Glycosylphosphatidylinositol phospholipase D                                                                            |
| 1278             | Q80UE5           | 12                   | 28             | 17                    | 918    | 101814 | 5.3 | Erythrocyte protein band 4.1-like 2, isoform CRA_c                                                                      |
| 1278             | B6ZHD0           | 12                   | 28             | 15.8                  | 988    | 109895 | 5.4 | Erythrocyte protein band 4.1-like 2                                                                                     |
| 1278             | UPI000024DA70    | 12                   | 28             | 15.8                  | 988    | 109940 | 5.4 | band 4.1-like protein 2                                                                                                 |
| 1278             | Q80UE3           | 12                   | 28             | 15.8                  | 988    | 109970 | 5.4 | Protein 4.1G                                                                                                            |
| 1278             | Q3UNQ6           | 12                   | 28             | 15.8                  | 988    | 109997 | 5.4 | Putative uncharacterized protein                                                                                        |
| 1278             | O70318           | 12                   | 28             | 15.8                  | 988    | 109833 | 5.5 | Band 4.1-like protein 2                                                                                                 |
| 1279             | Q8C2E7           | 12                   | 14             | 14.2                  | 1159   | 134110 | 7.1 | WASH complex subunit strumpellin                                                                                        |
| 1280             | Q6WKZ8           | 12                   | 12             | 9.5                   | 1755   | 199154 | 6.3 | E3 ubiquitin-protein ligase UBR2                                                                                        |
| 1280             | Q6WKZ8-2         | 12                   | 12             | 9.5                   | 1755   | 199197 | 6.3 | Isoform 2 of E3 ubiquitin-protein ligase UBR2                                                                           |
| 1281             | P39061-2         | 12                   | 30             | 12.4                  | 1315   | 134204 | 6   | Isoform 3 of Collagen alpha-1(XVIII) chain                                                                              |
| 1281             | P39061-1         | 12                   | 30             | 10.7                  | 1527   | 155950 | 5.4 | Isoform 2 of Collagen alpha-1(XVIII) chain                                                                              |
| 1281             | E9QPX1           | 12                   | 30             | 9.2                   | 1774   | 182296 | 5.7 | Uncharacterized protein                                                                                                 |
| 1281             | P39061           | 12                   | 30             | 9.2                   | 1774   | 182171 | 5.6 | Collagen alpha-1(XVIII) chain                                                                                           |
| 1282             | A2ASQ1           | 12                   | 58             | 8.2                   | 1950   | 207537 | 6.3 | Agrin                                                                                                                   |
| 1283             | Q6PDN3           | 12                   | 31             | 7.9                   | 1941   | 212924 | 6.2 | Myosin light chain kinase, smooth muscle                                                                                |
| 1283             | B1B1A8           | 12                   | 31             | 7.8                   | 1950   | 213608 | 6.2 | Myosin, light polypeptide kinase                                                                                        |
| 1284             | O76070           | 12                   | 111            | 80.3                  | 127    | 13331  | 4.9 | Gamma-synuclein                                                                                                         |
| 1285             | P05161           | 12                   | 167            | 77                    | 165    | 17887  | 7.5 | Ubiquitin-like protein ISG15                                                                                            |
| 1286             | Q95336           | 12                   | 39             | 76.7                  | 258    | 27547  | 6.1 | 6-phosphogluconolactonase                                                                                               |
| 1287             | P30086           | 12                   | 65             | 75.9                  | 187    | 21057  | 7.5 | Phosphatidylethanolamine-binding protein 1                                                                              |
| 1288             | Q9BUH6           | 12                   | 38             | 73.5                  | 204    | 21640  | 5.5 | Uncharacterized protein C9orf142                                                                                        |
| 1289             | Q9BU89           | 12                   | 17             | 73.2                  | 302    | 32904  | 4.8 | Deoxyhypusine hydroxylase                                                                                               |
| 1290             | Q9UKY7           | 12                   | 47             | 72.1                  | 258    | 27335  | 6.4 | Protein CDV3 log<br>cDNA FLJ38330 fis, clone FCBBF3025280, highly similar to                                            |
| 1291             | Q8N959           | 12                   | 110            | 79.6                  | 323    | 35226  | 6.3 | NDRG1 PROTEIN                                                                                                           |
| 1291             | E9PDL6           | 12                   | 110            | 72                    | 357    | 38701  | 6.2 | Uncharacterized protein                                                                                                 |
| 1291             | Q92597           | 12                   | 110            | 65.2                  | 394    | 42835  | 5.8 | Protein NDRG1                                                                                                           |
| 1291             | Q597H1           | 12                   | 110            | 65.2                  | 394    | 42819  | 5.8 | Transformation-related protein 14                                                                                       |
| 1292             | UPI0000E5A10A    | 12                   | 53             | 72.3                  | 242    | 25743  | 8.1 | L-xylulose reductase isoform 2                                                                                          |
| 1292             | Q7Z4W1           | 12                   | 53             | 71.7                  | 244    | 25913  | 8.1 | L-xylulose reductase                                                                                                    |
| 1293             | P20338           | 12                   | 54             | 71.4                  | 213    | 23871  | 6.1 | Ras-related protein Rab-4A                                                                                              |
| 1294             | Q8IXM2           | 12                   | 21             | 78.5                  | 172    | 17900  | 7.3 | Chromatin complexes subunit BAP18                                                                                       |
| 1294             | C9J4G0           | 12                   | 21             | 70.3                  | 192    | 19961  | 5.6 | HCG32827, isoform CRA_d                                                                                                 |
| 1295             | P52566           | 12                   | 43             | 70.1                  | 201    | 22988  | 5.2 | Rho GDP-dissociation inhibitor 2                                                                                        |
| 1296             | P20618           | 12                   | 74             | 69.7                  | 241    | 26489  | 8.1 | Proteasome subunit beta type-1                                                                                          |
| 1296             | Q53FT8           | 12                   | 74             | 69.7                  | 241    | 26491  | 8.1 | Proteasome beta 1 subunit variant (Fragment)                                                                            |
| 1297             | P54819-2         | 12                   | 27             | 70.7                  | 232    | 25615  | 7.9 | Isoform 2 of Adenylate kinase 2, mitochondrial                                                                          |
| 1297             | P54819           | 12                   | 27             | 68.6                  | 239    | 26478  | 7.8 | Adenylate kinase 2, mitochondrial                                                                                       |
| 1298             | Q9UBQ5           | 12                   | 65             | 68.3                  | 218    | 25060  | 4.9 | Eukaryotic translation initiation factor 3 subunit K                                                                    |
| 1299             | P00568           | 12                   | 64             | 67                    | 194    | 21635  | 8.6 | Adenylate kinase isoenzyme 1                                                                                            |
| 1299             | Q53EY8           | 12                   | 64             | 67                    | 194    | 21619  | 8.9 | Adenylate kinase 1 variant (Fragment)                                                                                   |
| 1299             | Q5T9B7           | 12                   | 64             | 61.9                  | 210    | 23411  | 8.6 | Adenylate kinase 1                                                                                                      |
| 1300             | Q9HD15           | 12                   | 42             | 65.7                  | 236    | 25673  | 7   | Steroid receptor RNA activator 1                                                                                        |
| 1301             | E7EQ69           | 12                   | 48             | 64.3                  | 168    | 19311  | 8.8 | Uncharacterized protein                                                                                                 |
| 1301             | Q9GZZ1           | 12                   | 48             | 63.9                  | 169    | 19398  | 8.8 | N-alpha-acetyltransferase 50, NatE catalytic subunit                                                                    |
| 1302             | Q04323           | 12                   | 25             | 63.6                  | 297    | 33325  | 5.3 | UBX domain-containing protein 1                                                                                         |
| 1303             | P51580           | 12                   | 22             | 63.3                  | 245    | 28180  | 6.2 | Thiopurine S-methyltransferase                                                                                          |
| 1303             | Q9BS45           | 12                   | 22             | 63.3                  | 245    | 28233  | 6.4 | Thiopurine S-methyltransferase                                                                                          |
| 1304             | Q9H3H3           | 12                   | 25             | 63.3                  | 251    | 27355  | 5.5 | UPF0696 protein C11orf68                                                                                                |
| 1304             | UPI0000228EAC    | 12                   | 25             | 54.3                  | 293    | 31517  | 6.3 | basophilic leukemia expressed protein BLES03 isoform 1                                                                  |
| 1305             | P42574           | 12                   | 36             | 63.2                  | 277    | 31608  | 6.5 | Caspase-3                                                                                                               |
| 1306             | Q6IBT1           | 12                   | 94             | 62.5                  | 277    | 29937  | 7.7 | Proteasome subunit beta type                                                                                            |
| 1306             | Q99436           | 12                   | 94             | 62.5                  | 277    | 29965  | 7.7 | Proteasome subunit beta type-7                                                                                          |
| 1306             | Q86U62           | 12                   | 94             | 62.5                  | 277    | 30018  | 8   | Proteasome subunit beta type                                                                                            |
| 1307             | P36543           | 12                   | 32             | 62.4                  | 226    | 26145  | 8   | V-type proton ATPase subunit E 1                                                                                        |
| 1308             | Q9UBW8           | 12                   | 36             | 61.8                  | 275    | 30277  | 8.2 | COP9 signalosome complex subunit 7a                                                                                     |
| 1309             | UPI000020A341    | 12                   | 122            | 60.9                  | 197    | 22310  | 6.1 | retinol-binding protein 1 isoform a                                                                                     |
| 1310             | P28074           | 12                   | 63             | 59.7                  | 263    | 28480  | 6.9 | Proteasome subunit beta type-5                                                                                          |
| 1311             | P52565           | 12                   | 178            | 58.3                  | 204    | 23207  | 5.1 | Rho GDP-dissociation inhibitor 1                                                                                        |
| 1312             | O76003           | 12                   | 42             | 58.2                  | 335    | 37432  | 5.4 | Glutaredoxin-3<br>cDNA FLJ76813, highly similar to sapiens acetyl-Coenzyme A                                            |
| 1313             | A8K4W5           | 12                   | 33             | 57.9                  | 397    | 41379  | 6.9 | acetyltransferase 2 (acetoacetyl Coenzyme A thiolase), mRNA                                                             |
| 1313             | Q9BWD1           | 12                   | 33             | 57.9                  | 397    | 41351  | 6.9 | Acetyl-CoA acetyltransferase, cytosolic                                                                                 |
| 1313             | Q59GW6           | 12                   | 33             | 56.9                  | 404    | 42136  | 7.4 | Acetyl-CoA acetyltransferase, cytosolic variant (Fragment)<br>cDNA, FLJ92300, sapiens COP9 subunit 6 (MOV34 log, 34 kD) |
| 1314             | B2R514           | 12                   | 35             | 57.9                  | 297    | 33576  | 6   | (COPS6), mRNA                                                                                                           |
| 1314             | E7EM64           | 12                   | 35             | 52.8                  | 326    | 36064  | 5.7 | Uncharacterized protein                                                                                                 |
| 1314             | Q7L5N1           | 12                   | 35             | 52.6                  | 327    | 36163  | 5.7 | COP9 signalosome complex subunit 6                                                                                      |
| 1315             | P52597           | 12                   | 135            | 57.6                  | 415    | 45672  | 5.6 | Heterogeneous nuclear ribonucleoprotein F<br>cDNA FLJ52696, highly similar to Eukaryotic translation initiation         |
| 1316             | B4DMT5           | 12                   | 55             | 57.3                  | 307    | 33240  | 5.6 | factor 3 subunit 5                                                                                                      |
| 1316             | O00303           | 12                   | 55             | 49.3                  | 357    | 37564  | 5.4 | Eukaryotic translation initiation factor 3 subunit F                                                                    |
| 1317             | Q9H3H0           | 12                   | 26             | 56.7                  | 247    | 28275  | 9.4 | Vacuolar ATP synthase subunit D log                                                                                     |
| 1317             | Q9Y5K8           | 12                   | 26             | 56.7                  | 247    | 28263  | 9.4 | V-type proton ATPase subunit D                                                                                          |
| 1318             | Q59EU6           | 12                   | 50             | 54.7                  | 265    | 29774  | 6.2 | EF hand domain family, member D1 variant (Fragment)                                                                     |
| 1319             | Q9Y5K5-2         | 12                   | 33             | 55.1                  | 316    | 36079  | 5.2 | Isoform 2 of Ubiquitin carboxyl-terminal hydrolase isozyme L5                                                           |
| 1319             | E9PGR0           | 12                   | 33             | 54.9                  | 317    | 36419  | 5.3 | Uncharacterized protein                                                                                                 |
| 1319             | E7EQ55           | 12                   | 33             | 54.5                  | 319    | 36500  | 5.9 | Uncharacterized protein                                                                                                 |
| 1319             | Q9Y5K5-4         | 12                   | 33             | 53.4                  | 326    | 37353  | 5.3 | Isoform 4 of Ubiquitin carboxyl-terminal hydrolase isozyme L5                                                           |
| 1319             | Q9Y5K5-3         | 12                   | 33             | 53                    | 328    | 37478  | 5.4 | Isoform 3 of Ubiquitin carboxyl-terminal hydrolase isozyme L5                                                           |
| 1319             | Q9Y5K5           | 12                   | 33             | 52.9                  | 329    | 37607  | 5.3 | Ubiquitin carboxyl-terminal hydrolase isozyme L5                                                                        |
| 1319             | Q5LJA5           | 12                   | 33             | 49                    | 355    | 40423  | 5.3 | Ubiquitin carboxyl-terminal hydrolase L5                                                                                |
| 1319             | Q5LJA9           | 12                   | 33             | 47.3                  | 368    | 41695  | 5.5 | Ubiquitin carboxyl-terminal hydrolase L5 (Fragment)                                                                     |
| 1320             | O75822           | 12                   | 29             | 52.3                  | 258    | 29062  | 4.8 | Eukaryotic translation initiation factor 3 subunit J                                                                    |
| 1321             | P78406           | 12                   | 23             | 51.4                  | 368    | 40968  | 7.8 | mRNA export factor<br>cDNA, FLJ96778, highly similar to sapiens aminopeptidase-like 1                                   |
| 1322             | B2RDV2           | 12                   | 18             | 50.9                  | 411    | 43518  | 5.9 | (NPEPL1), mRNA                                                                                                          |
| 1323             | P46777           | 12                   | 96             | 50.5                  | 297    | 34363  | 9.7 | 60S ribosomal protein L5                                                                                                |
| 1324             | Q9BRF8           | 12                   | 23             | 50.3                  | 314    | 35548  | 6.2 | Calcineurin-like phosphoesterase domain-containing protein 1                                                            |
| 1325             | Q86WR0           | 12                   | 37             | 49.5                  | 208    | 24479  | 6.8 | Coiled-coil domain-containing protein 25                                                                                |
| 1326             | Q0QF37           | 12                   | 29             | 54.8                  | 305    | 31969  | 7.9 | Malate dehydrogenase (Fragment)                                                                                         |
| 1326             | P40926           | 12                   | 29             | 49.4                  | 338    | 35503  | 8.7 | Malate dehydrogenase, mitochondrial                                                                                     |
| 1326             | Q6FHZ0           | 12                   | 29             | 49.4                  | 338    | 35559  | 8.7 | Malate dehydrogenase                                                                                                    |
| 1327             | Q6F181           | 12                   | 38             | 49.4                  | 312    | 33582  | 5.6 | Anamorsin<br>cDNA FLJ58311, highly similar to 5'-AMP-activated protein kinase                                           |
| 1328             | B4DDT7           | 12                   | 27             | 49.2                  | 299    | 34084  | 8.5 | subunit gamma-1                                                                                                         |
| 1328             | P54619           | 12                   | 27             | 44.4                  | 331    | 37579  | 6.9 | 5'-AMP-activated protein kinase subunit gamma-1                                                                         |

Table S1. Proteins identified in the OVCAR-3 tumor supernatant by two or more unique peptides.

| Protein or Protein Group | Accession Number | Unique Peptide Count | Spectrum Count | Sequence Coverage (%) | Length | MolWt  | pI   | Descriptive Name                                                                                                                    |
|--------------------------|------------------|----------------------|----------------|-----------------------|--------|--------|------|-------------------------------------------------------------------------------------------------------------------------------------|
| 1329                     | P55145           | 12                   | 31             | 48.6                  | 179    | 20257  | 8.4  | Mesencephalic astrocyte-derived neurotrophic factor                                                                                 |
| 1329                     | UPI000013D9C8    | 12                   | 31             | 37.2                  | 234    | 26903  | 10.1 | UPI000013D9C8 UniRef100 entry                                                                                                       |
| 1330                     | O43813           | 12                   | 19             | 48.4                  | 399    | 45283  | 7.8  | Lanc-like protein 1                                                                                                                 |
| 1330                     | Q6FHH6           | 12                   | 19             | 48.4                  | 399    | 45267  | 7.8  | LANCL1 protein (Fragment)                                                                                                           |
| 1331                     | Q16539           | 12                   | 24             | 48.1                  | 360    | 41293  | 5.8  | Mitogen-activated protein kinase 14                                                                                                 |
| 1332                     | Q05048           | 12                   | 22             | 47.8                  | 431    | 48358  | 6.6  | Cleavage stimulation factor subunit 1                                                                                               |
| 1333                     | Q86UY0           | 12                   | 34             | 51.9                  | 360    | 40369  | 5.8  | TXNDC5 protein                                                                                                                      |
| 1333                     | Q658S9           | 12                   | 34             | 47.7                  | 392    | 43505  | 5.5  | Putative uncharacterized protein DKFZp666i134 (Fragment)                                                                            |
| 1333                     | Q8NBS9           | 12                   | 34             | 43.3                  | 432    | 47629  | 6    | Thioredoxin domain-containing protein 5                                                                                             |
| 1334                     | P15880           | 12                   | 95             | 47.1                  | 293    | 31324  | 10.2 | 40S ribosomal protein S2                                                                                                            |
| 1335                     | Q9H1E3           | 12                   | 82             | 46.9                  | 243    | 27296  | 5.1  | Nuclear ubiquitous casein and cyclin-dependent kinases substrate Isoform 2 of cAMP-dependent protein kinase catalytic subunit alpha |
| 1336                     | P17612-2         | 12                   | 19             | 47.5                  | 343    | 39822  | 8.7  | alpha                                                                                                                               |
| 1336                     | P17612           | 12                   | 19             | 46.4                  | 351    | 40590  | 8.8  | cAMP-dependent protein kinase catalytic subunit alpha                                                                               |
| 1337                     | Q53F20           | 12                   | 89             | 46.2                  | 266    | 30434  | 3.9  | Acidic (Leucine-rich) nuclear phosphoprotein 32 family, member E variant (Fragment)                                                 |
| 1337                     | Q9BTT0           | 12                   | 89             | 45.9                  | 268    | 30692  | 3.8  | Acidic leucine-rich nuclear phosphoprotein 32 family member E                                                                       |
| 1338                     | Q9UJ70           | 12                   | 25             | 46.2                  | 344    | 37376  | 6.2  | N-acetyl-D-glucosamine kinase                                                                                                       |
| 1339                     | P51570           | 12                   | 20             | 49                    | 392    | 42272  | 6.5  | Galactokinase                                                                                                                       |
| 1339                     | Q6ZP37           | 12                   | 20             | 48.5                  | 396    | 42952  | 7.2  | CDNA FLJ26554 fis, clone LNF01773, highly similar to Galactokinase                                                                  |
| 1339                     | B4E1G6           | 12                   | 20             | 45.5                  | 422    | 45358  | 6.7  | Galactokinase 1                                                                                                                     |
| 1340                     | Q08752           | 12                   | 28             | 44.9                  | 370    | 40764  | 7.2  | Peptidyl-prolyl cis-trans isomerase D                                                                                               |
| 1340                     | Q6FGM6           | 12                   | 28             | 44.9                  | 370    | 40773  | 7.2  | PPID protein                                                                                                                        |
| 1341                     | P25788-2         | 12                   | 36             | 46                    | 248    | 27647  | 5.3  | Isoform 2 of Proteasome subunit alpha type-3                                                                                        |
| 1341                     | P25788           | 12                   | 36             | 44.7                  | 255    | 28433  | 5.3  | Proteasome subunit alpha type-3                                                                                                     |
| 1342                     | A5GFU6           | 12                   | 29             | 44.1                  | 379    | 44179  | 6.3  | GNAS complex locus                                                                                                                  |
| 1342                     | P63092-2         | 12                   | 29             | 43.9                  | 380    | 44266  | 6.3  | Isoform Gnas-2 of Guanine nucleotide-binding protein G(s) subunit alpha isoforms short                                              |
| 1342                     | P63092           | 12                   | 29             | 42.4                  | 394    | 45665  | 5.8  | Guanine nucleotide-binding protein G(s) subunit alpha isoforms short                                                                |
| 1342                     | A6NI00           | 12                   | 29             | 42.3                  | 395    | 45752  | 5.8  | Uncharacterized protein                                                                                                             |
| 1342                     | Q5JWF2-2         | 12                   | 29             | 16.3                  | 1023   | 109626 | 5.1  | Isoform XLas-2 of Guanine nucleotide-binding protein G(s) subunit alpha isoforms XLas                                               |
| 1342                     | Q5JWF2           | 12                   | 29             | 16.1                  | 1037   | 111024 | 5    | Guanine nucleotide-binding protein G(s) subunit alpha isoforms XLas                                                                 |
| 1343                     | Q13148           | 12                   | 53             | 44                    | 414    | 44740  | 6.2  | TAR DNA-binding protein 43                                                                                                          |
| 1344                     | O75821           | 12                   | 44             | 43.1                  | 320    | 35611  | 6.1  | Eukaryotic translation initiation factor 3 subunit G                                                                                |
| 1345                     | Q6DKJ4           | 12                   | 26             | 42.3                  | 435    | 48392  | 5    | Nucleoredoxin                                                                                                                       |
| 1346                     | Q8N806           | 12                   | 21             | 41.4                  | 425    | 47999  | 4.8  | Putative E3 ubiquitin-protein ligase UBR7                                                                                           |
| 1347                     | Q99447           | 12                   | 22             | 40.6                  | 389    | 43835  | 6.9  | Ethanolamine-phosphate cytidyltransferase                                                                                           |
| 1347                     | UPI0000D4CB10    | 12                   | 22             | 38.8                  | 407    | 45622  | 6.7  | ethanolamine-phosphate cytidyltransferase isoform 1                                                                                 |
| 1348                     | Q9BS26           | 12                   | 22             | 40.4                  | 406    | 46971  | 5.3  | Endoplasmic reticulum resident protein 44                                                                                           |
| 1349                     | Q13867           | 12                   | 30             | 39.6                  | 455    | 52562  | 6.3  | Bleomycin hydrolase                                                                                                                 |
| 1350                     | Q9BWF3           | 12                   | 43             | 39.6                  | 364    | 40314  | 7.1  | RNA-binding protein 4                                                                                                               |
| 1351                     | Q13283           | 12                   | 111            | 39.3                  | 466    | 52164  | 5.5  | Ras GTPase-activating protein-binding protein 1                                                                                     |
| 1352                     | B4DZK0           | 12                   | 25             | 39                    | 510    | 57321  | 8.5  | cDNA FLJ56391, highly similar to Cysteine protease ATG4B (EC 3.4.22.-)                                                              |
| 1353                     | P26196           | 12                   | 43             | 38.5                  | 483    | 54417  | 8.7  | Probable ATP-dependent RNA helicase DDX6                                                                                            |
| 1354                     | Q9P2T1           | 12                   | 30             | 44                    | 348    | 37874  | 7.2  | GMP reductase 2                                                                                                                     |
| 1354                     | Q6PKC0           | 12                   | 30             | 37.4                  | 409    | 45008  | 8.3  | GMP reductase                                                                                                                       |
| 1355                     | Q9Y570           | 12                   | 31             | 36                    | 386    | 42315  | 6    | Protein phosphatase methylesterase 1                                                                                                |
| 1356                     | P35520           | 12                   | 19             | 35.4                  | 551    | 60587  | 6.6  | Cystathionine beta-synthase                                                                                                         |
| 1356                     | P35520-2         | 12                   | 19             | 34.5                  | 565    | 61863  | 6.4  | Isoform 2 of Cystathionine beta-synthase                                                                                            |
| 1357                     | Q15645           | 12                   | 27             | 34.7                  | 432    | 48551  | 6.1  | Thyroid receptor-interacting protein 13                                                                                             |
| 1358                     | Q9H993           | 12                   | 21             | 34.7                  | 441    | 51172  | 5.8  | UPF0364 protein C6orf211                                                                                                            |
| 1359                     | Q59F94           | 12                   | 34             | 34                    | 600    | 63740  | 5.2  | Ataxin-1 ubiquitin-like interacting protein variant (Fragment)                                                                      |
| 1360                     | Q9NX58           | 12                   | 42             | 34                    | 379    | 43615  | 9.5  | Cell growth-regulating nucleolar protein                                                                                            |
| 1361                     | Q8WVY7           | 12                   | 23             | 32.7                  | 318    | 36805  | 6.5  | Ubiquitin-like domain-containing CTD phosphatase 1                                                                                  |
| 1362                     | Q9Y383           | 12                   | 50             | 31.1                  | 392    | 46514  | 10   | Putative RNA-binding protein Luc7-like 2                                                                                            |
| 1363                     | P10644           | 12                   | 18             | 31                    | 381    | 42982  | 5.3  | cAMP-dependent protein kinase type I-alpha regulatory subunit                                                                       |
| 1363                     | Q68DQ4           | 12                   | 18             | 31                    | 381    | 42948  | 5.3  | Putative uncharacterized protein DKFZp779L0468                                                                                      |
| 1364                     | Q9UK59           | 12                   | 26             | 28.5                  | 544    | 61555  | 5.5  | Lariat debranching enzyme                                                                                                           |
| 1365                     | O95793-2         | 12                   | 41             | 33.1                  | 496    | 54934  | 9.5  | Isoform Short of Double-stranded RNA-binding protein Staufen log 1                                                                  |
| 1365                     | Q5JW29           | 12                   | 41             | 32.7                  | 502    | 55635  | 9.5  | Staufen protein T4 variant                                                                                                          |
| 1365                     | A8K622           | 12                   | 41             | 28.4                  | 577    | 63192  | 9.4  | cDNA FLJ75871, highly similar to sapiens staufen, RNA binding protein (STAU), transcript variant T3, mRNA                           |
| 1365                     | O95793           | 12                   | 41             | 28.4                  | 577    | 63182  | 9.4  | Double-stranded RNA-binding protein Staufen log 1                                                                                   |
| 1366                     | Q8WX92           | 12                   | 22             | 26.2                  | 580    | 65697  | 6.1  | Negative elongation factor B                                                                                                        |
| 1367                     | P08621           | 12                   | 51             | 26.1                  | 437    | 51557  | 9.9  | U1 small nuclear ribonucleoprotein 70 kDa                                                                                           |
| 1368                     | A8K4C2           | 12                   | 43             | 24.8                  | 604    | 66822  | 8.7  | cDNA FLJ75458, highly similar to sapiens sulfhydryl oxidase mRNA                                                                    |
| 1368                     | Q00391-2         | 12                   | 43             | 24.8                  | 604    | 66861  | 8.6  | Isoform 2 of Sulfhydryl oxidase 1                                                                                                   |
| 1368                     | A8MXT8           | 12                   | 43             | 24.8                  | 604    | 66847  | 8.6  | Uncharacterized protein                                                                                                             |
| 1368                     | Q00391           | 12                   | 43             | 20.1                  | 747    | 82578  | 8.9  | Sulfhydryl oxidase 1                                                                                                                |
| 1369                     | Q86YQ0           | 12                   | 24             | 24.2                  | 765    | 84721  | 8.1  | HZGJ                                                                                                                                |
| 1370                     | Q8IZ83           | 12                   | 21             | 23.6                  | 802    | 85127  | 6.8  | Aldehyde dehydrogenase family 16 member A1                                                                                          |
| 1371                     | Q06210-2         | 12                   | 31             | 22.9                  | 681    | 76759  | 6.9  | Isoform 2 of Glucosamine-fructose-6-phosphate aminotransferase [isomerizing] 1                                                      |
| 1371                     | Q06210           | 12                   | 31             | 22.3                  | 699    | 78806  | 7.1  | Glucosamine-fructose-6-phosphate aminotransferase [isomerizing] 1                                                                   |
| 1372                     | Q58EY4           | 12                   | 53             | 20.2                  | 1105   | 122911 | 5.7  | SWI/SNF related, matrix associated, actin dependent regulator of chromatin, subfamily c, member 1                                   |
| 1372                     | Q92922           | 12                   | 53             | 20.2                  | 1105   | 122867 | 5.8  | SWI/SNF complex subunit SMARCC1                                                                                                     |
| 1373                     | Q92854           | 12                   | 25             | 20.2                  | 862    | 96150  | 8    | Semaphorin-4D                                                                                                                       |
| 1373                     | Q4LE41           | 12                   | 25             | 20                    | 870    | 97153  | 8    | SEMA4D variant protein (Fragment)                                                                                                   |
| 1374                     | Q86TI2           | 12                   | 14             | 19.7                  | 863    | 98263  | 6.5  | Dipeptidyl peptidase 9                                                                                                              |
| 1375                     | B2RAM6           | 12                   | 31             | 17                    | 1056   | 119132 | 5.7  | cDNA, FLJ95005, highly similar to sapiens kinesin family member 11 (KIF11), mRNA                                                    |
| 1375                     | P52732           | 12                   | 31             | 17                    | 1056   | 119159 | 5.6  | Kinesin-like protein KIF11                                                                                                          |
| 1376                     | Q7Z3J2           | 12                   | 33             | 16.8                  | 963    | 109562 | 7.2  | UPF0505 protein C16orf62                                                                                                            |
| 1376                     | UPI0001E1129C    | 12                   | 33             | 15.4                  | 1052   | 118614 | 7.8  | hypothetical protein LOC57020                                                                                                       |
| 1377                     | Q08379           | 12                   | 17             | 16.5                  | 1002   | 113086 | 5    | Golgin subfamily A member 2                                                                                                         |
| 1378                     | E7EWZ6           | 12                   | 13             | 17.2                  | 1002   | 111131 | 5.6  | Uncharacterized protein                                                                                                             |
| 1378                     | B7Z883           | 12                   | 13             | 17.2                  | 1002   | 111145 | 5.6  | cDNA FLJ51414, highly similar to Integrin alpha-V                                                                                   |
| 1378                     | A5YM53           | 12                   | 13             | 16.4                  | 1048   | 116105 | 5.7  | ITGAV protein                                                                                                                       |
| 1378                     | P06756           | 12                   | 13             | 16.4                  | 1048   | 116038 | 5.7  | Integrin alpha-V                                                                                                                    |
| 1379                     | B7ZKT9           | 12                   | 23             | 15.6                  | 1174   | 136516 | 7.4  | KIAA1033 protein                                                                                                                    |
| 1380                     | B0AZM4           | 12                   | 12             | 15.4                  | 1353   | 156837 | 7.1  | cDNA, FLJ79464, highly similar to sapiens aquarius (Fragment)                                                                       |
| 1380                     | A8K6F0           | 12                   | 12             | 14.1                  | 1485   | 171295 | 6.3  | cDNA FLJ75449, highly similar to sapiens aquarius log (mouse) (AQR), mRNA                                                           |

Table S1. Proteins identified in the OVCAR-3 tumor supernatant by two or more unique peptides.

| Protein or Protein Group | Accession Number | Unique Peptide Count | Spectrum Count | Sequence Coverage (%) | Length | MolWt  | pI   | Descriptive Name                                                                                             |
|--------------------------|------------------|----------------------|----------------|-----------------------|--------|--------|------|--------------------------------------------------------------------------------------------------------------|
| 1380                     | O60306           | 12                   | 12             | 14.1                  | 1485   | 171294 | 6.4  | Intron-binding protein aquarius                                                                              |
| 1381                     | O75339           | 12                   | 19             | 12.2                  | 1184   | 132565 | 8.4  | Cartilage intermediate layer protein 1                                                                       |
| 1381                     | UPI0001779559    | 12                   | 19             | 12.2                  | 1184   | 132566 | 8.3  | cartilage intermediate layer protein 1 preproprotein                                                         |
| 1382                     | Q52LW3           | 12                   | 32             | 11.6                  | 1261   | 142063 | 6.7  | Rho GTPase-activating protein 29                                                                             |
| 1383                     | P07996           | 12                   | 28             | 11                    | 1170   | 129383 | 4.9  | Thrombospondin-1                                                                                             |
| 1383                     | Q59E99           | 12                   | 28             | 10.5                  | 1225   | 134849 | 5    | Thrombospondin 1 variant (Fragment)                                                                          |
| 1384                     | O14497           | 12                   | 22             | 7.3                   | 2285   | 242042 | 6.7  | AT-rich interactive domain-containing protein 1A                                                             |
| 1385                     | Q14008-2         | 12                   | 32             | 7.2                   | 1972   | 218524 | 8.1  | Isoform 2 of Cytoskeleton-associated protein 5                                                               |
| 1385                     | Q14008           | 12                   | 32             | 6.9                   | 2032   | 225493 | 7.8  | Cytoskeleton-associated protein 5                                                                            |
| 1385                     | Q14008-3         | 12                   | 32             | 6.9                   | 2039   | 226256 | 7.8  | Isoform 3 of Cytoskeleton-associated protein 5                                                               |
| 1386                     | Q70CQ2-3         | 12                   | 22             | 4.9                   | 3312   | 377599 | 5.9  | Isoform 3 of Ubiquitin carboxyl-terminal hydrolase 34                                                        |
| 1386                     | C9JVG4           | 12                   | 22             | 4.9                   | 3311   | 377471 | 5.9  | Ubiquitin carboxyl-terminal hydrolase                                                                        |
| 1386                     | B9ZVR8           | 12                   | 22             | 4.8                   | 3394   | 387027 | 5.9  | Ubiquitin carboxyl-terminal hydrolase                                                                        |
| 1386                     | Q70CQ2-2         | 12                   | 22             | 4.8                   | 3395   | 387155 | 6    | Isoform 2 of Ubiquitin carboxyl-terminal hydrolase 34                                                        |
| 1386                     | Q70CQ2           | 12                   | 22             | 4.6                   | 3546   | 404234 | 5.8  | Ubiquitin carboxyl-terminal hydrolase 34                                                                     |
| 1386                     | C9JGA8           | 12                   | 22             | 4.6                   | 3546   | 404282 | 5.9  | Ubiquitin carboxyl-terminal hydrolase                                                                        |
| 1387                     | P62487           | 11                   | 46             | 93.6                  | 172    | 19294  | 5.5  | DNA-directed RNA polymerase II subunit RPB7                                                                  |
| 1388                     | P84085           | 11                   | 626            | 80                    | 180    | 20530  | 6.8  | ADP-ribosylation factor 5 ADP-ribosylation factor 5                                                          |
| 1389                     | P61086           | 11                   | 66             | 74.5                  | 200    | 22407  | 5.4  | Ubiquitin-conjugating enzyme E2 K                                                                            |
| 1390                     | Q09028-3         | 11                   | 76             | 76.3                  | 410    | 46158  | 5.1  | Isoform 3 of Histone-binding protein RBBP4                                                                   |
| 1390                     | Q09028           | 11                   | 76             | 73.6                  | 425    | 47656  | 4.9  | Histone-binding protein RBBP4                                                                                |
| 1390                     | Q06972           | 11                   | 76             | 73.6                  | 425    | 47655  | 4.9  | Histone-binding protein RBBP4                                                                                |
| 1391                     | P61224           | 11                   | 150            | 72.8                  | 184    | 20825  | 5.8  | Ras-related protein Rap-1b Ras-related protein Rap-1b                                                        |
| 1392                     | Q6PJ77           | 11                   | 61             | 70.6                  | 153    | 16470  | 5.6  | BTF3L4 protein (Fragment)                                                                                    |
| 1392                     | Q96K17           | 11                   | 61             | 68.4                  | 158    | 17271  | 6.4  | Transcription factor BTF3 log 4                                                                              |
| 1393                     | P62491           | 11                   | 172            | 68.1                  | 216    | 24394  | 6.5  | Transcription factor BTF3 log 4                                                                              |
| 1394                     | Q53GF5           | 11                   | 70             | 67.1                  | 234    | 25841  | 8    | Proteasome subunit alpha type (Fragment)                                                                     |
| 1394                     | P49722           | 11                   | 70             | 67.1                  | 234    | 25926  | 8.3  | Proteasome subunit alpha type-2                                                                              |
| 1394                     | P25787           | 11                   | 70             | 67.1                  | 234    | 25899  | 7.4  | Proteasome subunit alpha type-2                                                                              |
| 1394                     | P17220           | 11                   | 70             | 67.1                  | 234    | 25927  | 7.4  | Proteasome subunit alpha type-2                                                                              |
| 1394                     | E9Q3A4           | 11                   | 70             | 63.8                  | 246    | 27426  | 8.2  | Uncharacterized protein                                                                                      |
| 1394                     | Q3UWT6           | 11                   | 70             | 63.6                  | 247    | 27510  | 8.2  | Proteasome subunit alpha type                                                                                |
| 1395                     | O75934           | 11                   | 40             | 63.6                  | 225    | 26131  | 5.6  | Pre-mRNA-splicing factor SPF27                                                                               |
| 1396                     | P62249           | 11                   | 159            | 61                    | 146    | 16445  | 10.2 | 40S ribosomal protein S16                                                                                    |
| 1396                     | Q5CZY9           | 11                   | 159            | 51.7                  | 172    | 19274  | 10.2 | 40S ribosomal protein S16                                                                                    |
| 1397                     | Q4JGY1           | 11                   | 176            | 62.6                  | 171    | 18871  | 7.6  | Rps16 protein                                                                                                |
| 1397                     | P53996           | 11                   | 176            | 60.1                  | 178    | 19592  | 7.6  | Cellular nucleic acid binding protein beta variant 1                                                         |
| 1398                     | P46782           | 11                   | 96             | 57.4                  | 204    | 22876  | 9.7  | Cellular nucleic acid binding protein beta variant 1                                                         |
| 1398                     | Q91V55           | 11                   | 96             | 57.4                  | 204    | 22876  | 9.7  | Cellular nucleic acid binding protein beta variant 1                                                         |
| 1399                     | Q8VC94           | 11                   | 100            | 61.1                  | 167    | 19024  | 9.8  | 40S ribosomal protein S5                                                                                     |
| 1399                     | Q08E58           | 11                   | 100            | 57.6                  | 177    | 20094  | 9.6  | Rpl11 protein Rpl11 protein                                                                                  |
| 1399                     | P62913           | 11                   | 100            | 57.3                  | 178    | 20252  | 9.6  | Cell growth-inhibiting protein 34                                                                            |
| 1400                     | B4DL66           | 11                   | 24             | 53                    | 287    | 32892  | 6.8  | 60S ribosomal protein L11                                                                                    |
| 1400                     | Q9H832           | 11                   | 24             | 42.9                  | 354    | 38210  | 5.6  | 60S ribosomal protein L11                                                                                    |
| 1400                     | Q3UE37           | 11                   | 24             | 42.7                  | 356    | 38368  | 5.6  | 60S ribosomal protein L11                                                                                    |
| 1401                     | B2RCX0           | 11                   | 117            | 51.3                  | 277    | 32134  | 4.2  | cDNA FLJ56297, highly similar to Rattus norvegicus ubiquitin-conjugating enzyme E2Z (putative) (Ube2z), mRNA |
| 1401                     | Q9EQU5-2         | 11                   | 117            | 51.3                  | 277    | 32105  | 4.2  | Ubiquitin-conjugating enzyme E2 Z                                                                            |
| 1401                     | Q01105-2         | 11                   | 117            | 51.3                  | 277    | 32103  | 4.2  | Ubiquitin-conjugating enzyme E2 Z                                                                            |
| 1402                     | P60891           | 11                   | 48             | 48.1                  | 318    | 34834  | 7    | cDNA, FLJ96345, sapiens SET translocation (myeloid leukemia-associated) (SET), mRNA                          |
| 1402                     | UPI00001C4EFA    | 11                   | 48             | 48.1                  | 318    | 34824  | 7    | Isoform 2 of Protein SET                                                                                     |
| 1402                     | Q53FW2           | 11                   | 48             | 48.1                  | 318    | 34864  | 6.8  | Isoform 2 of Protein SET                                                                                     |
| 1402                     | Q3TI27           | 11                   | 48             | 48.1                  | 318    | 34865  | 7    | Ribose-phosphate pyrophosphokinase (Fragment)                                                                |
| 1403                     | Q5TCU3           | 11                   | 31             | 43.7                  | 284    | 32815  | 4.7  | Ribose-phosphate pyrophosphokinase                                                                           |
| 1403                     | Q61344           | 11                   | 31             | 43.7                  | 284    | 32801  | 4.7  | Ribose-phosphate pyrophosphokinase 1                                                                         |
| 1404                     | Q07955           | 11                   | 42             | 44.4                  | 248    | 27745  | 10.4 | hypothetical protein LOC328099                                                                               |
| 1404                     | E9QK11           | 11                   | 42             | 43.5                  | 253    | 28329  | 10.1 | Ribose-phosphate pyrophosphokinase (Fragment)                                                                |
| 1405                     | P04899           | 11                   | 20             | 39.4                  | 355    | 40451  | 5.5  | Ribose-phosphate pyrophosphokinase                                                                           |
| 1405                     | Q3TXK7           | 11                   | 20             | 39.4                  | 355    | 40489  | 5.5  | Tropomyosin 2 (Beta)                                                                                         |
| 1406                     | Q80XR5           | 11                   | 127            | 38.6                  | 471    | 53121  | 9.1  | Beta-tropomyosin                                                                                             |
| 1406                     | P26368           | 11                   | 127            | 38.3                  | 475    | 53501  | 9.1  | Serine/arginine-rich splicing factor 1                                                                       |
| 1406                     | P26369           | 11                   | 127            | 38.3                  | 475    | 53517  | 9.1  | Serine/arginine-rich splicing factor 1                                                                       |
| 1407                     | Q60884           | 11                   | 21             | 38.1                  | 412    | 45746  | 6.5  | Splicing factor U2AF 65 kDa subunit                                                                          |
| 1407                     | Q9QYJ0           | 11                   | 21             | 38.1                  | 412    | 45746  | 6.5  | Splicing factor U2AF 65 kDa subunit                                                                          |
| 1407                     | Q3TFF0           | 11                   | 21             | 38.1                  | 412    | 45747  | 6.4  | DnaJ log subfamily A member 2                                                                                |
| 1408                     | B7Z382           | 11                   | 17             | 34.6                  | 532    | 61441  | 5.7  | DnaJ log subfamily A member 2                                                                                |
| 1408                     | Q3V1L4           | 11                   | 17             | 32.9                  | 560    | 64809  | 6.2  | Putative uncharacterized protein                                                                             |
| 1408                     | A8K6K2           | 11                   | 17             | 32.8                  | 561    | 64960  | 6.1  | cDNA FLJ53335, highly similar to Cytosolic purine 5'-nucleotidase (EC 3.1.3.5)                               |
| 1408                     | P49902           | 11                   | 17             | 32.8                  | 561    | 64970  | 6.1  | Cytosolic purine 5'-nucleotidase                                                                             |
| 1408                     | E9Q9M1           | 11                   | 17             | 31.4                  | 586    | 67704  | 6.8  | Cytosolic purine 5'-nucleotidase                                                                             |
| 1409                     | A8K566           | 11                   | 13             | 28.3                  | 501    | 58791  | 5.4  | Uncharacterized protein                                                                                      |
| 1409                     | Q9D554           | 11                   | 13             | 28.3                  | 501    | 58842  | 5.3  | cDNA FLJ78246, highly similar to sapiens splicing factor 3a, subunit 3, 60kDa (SF3A3), mRNA                  |
| 1409                     | Q12874           | 11                   | 13             | 28.3                  | 501    | 58849  | 5.4  | Splicing factor 3A subunit 3                                                                                 |
| 1409                     | B3KY12           | 11                   | 13             | 28.3                  | 501    | 58777  | 5.4  | Splicing factor 3A subunit 3                                                                                 |
| 1410                     | Q5R914           | 11                   | 25             | 25.8                  | 511    | 57659  | 6.3  | Splicing factor 3A subunit 3                                                                                 |
| 1410                     | P63328-2         | 11                   | 25             | 25.8                  | 511    | 57615  | 6.3  | cDNA FLJ46581 fis, clone THYMU3043200, highly similar to Splicing factor 3A subunit 3                        |
| 1410                     | P63328           | 11                   | 25             | 25.3                  | 521    | 58644  | 5.9  | Serine/threonine-protein phosphatase 2B catalytic subunit alpha isoform                                      |
| 1410                     | Q08209           | 11                   | 25             | 25.3                  | 521    | 58688  | 5.9  | Serine/threonine-protein phosphatase 2B catalytic subunit alpha isoform                                      |
| 1411                     | E9PUF2           | 11                   | 24             | 42.1                  | 285    | 31596  | 5.9  | Uncharacterized protein                                                                                      |
| 1411                     | UPI0001F78A36    | 11                   | 24             | 26.5                  | 452    | 49230  | 6    | Uncharacterized protein                                                                                      |
| 1411                     | Q9Y2H0-3         | 11                   | 24             | 26.5                  | 453    | 49478  | 6    | UPI0001F78A36 UniRef100 entry                                                                                |
| 1411                     | B1AZP2-3         | 11                   | 24             | 26.5                  | 453    | 49460  | 6    | Isoform 3 of Disks large-associated protein 4                                                                |
| 1411                     | Q3UCF7           | 11                   | 24             | 26.3                  | 457    | 49849  | 6.2  | Isoform 3 of Disks large-associated protein 4                                                                |
| 1411                     | B7ZNS2           | 11                   | 24             | 12.3                  | 975    | 106170 | 7.2  | Putative uncharacterized protein (Fragment)                                                                  |
| 1411                     | B1AZP2           | 11                   | 24             | 12.1                  | 992    | 108037 | 7.1  | Dlgap4 protein                                                                                               |
| 1411                     | Q9Y2H0-1         | 11                   | 24             | 12.1                  | 989    | 107567 | 7.3  | Disks large-associated protein 4                                                                             |

Table S1. Proteins identified in the OVCAR-3 tumor supernatant by two or more unique peptides.

| Protein or Protein Group | Accession Number | Unique Peptide Count | Spectrum Count | Sequence Coverage (%) | Length | MolWt  | pI   | Descriptive Name                                                                                                              |
|--------------------------|------------------|----------------------|----------------|-----------------------|--------|--------|------|-------------------------------------------------------------------------------------------------------------------------------|
| 1411                     | Q9Y2H0           | 11                   | 24             | 12.1                  | 992    | 108012 | 7.1  | Disks large-associated protein 4                                                                                              |
| 1411                     | B1AZP2-2         | 11                   | 24             | 12.1                  | 989    | 107551 | 7.3  | Isoform 2 of Disks large-associated protein 4                                                                                 |
| 1412                     | P35278           | 11                   | 56             | 78.2                  | 216    | 23412  | 8.4  | Ras-related protein Rab-5C                                                                                                    |
| 1413                     | P68510           | 11                   | 63             | 77.6                  | 246    | 28212  | 4.9  | 14-3-3 protein eta                                                                                                            |
| 1414                     | Q00915           | 11                   | 94             | 73.3                  | 135    | 15846  | 5.2  | Retinol-binding protein 1                                                                                                     |
| 1415                     | P97314           | 11                   | 79             | 62.7                  | 193    | 20926  | 8.6  | Cysteine and glycine-rich protein 2                                                                                           |
| 1415                     | Q62908           | 11                   | 79             | 62.7                  | 193    | 20940  | 8.6  | Cysteine and glycine-rich protein 2                                                                                           |
| 1416                     | P26516           | 11                   | 31             | 61.4                  | 321    | 36540  | 6.8  | 26S proteasome non-ATPase regulatory subunit 7                                                                                |
| 1417                     | Q9DBP5           | 11                   | 45             | 58.7                  | 196    | 22165  | 5.8  | UMP-CMP kinase                                                                                                                |
| 1418                     | Q64674           | 11                   | 20             | 57.9                  | 302    | 33995  | 5.5  | Spermidine synthase                                                                                                           |
| 1418                     | Q8BSZ8           | 11                   | 20             | 57.9                  | 302    | 34019  | 5.6  | Putative uncharacterized protein                                                                                              |
| 1419                     | P00493           | 11                   | 45             | 57.8                  | 218    | 24570  | 6.7  | Hypoxanthine-guanine phosphoribosyltransferase                                                                                |
| 1419                     | Q99KF5           | 11                   | 45             | 57.8                  | 218    | 24544  | 6.7  | Hypoxanthine guanine phosphoribosyl transferase 1                                                                             |
| 1420                     | Q9DBZ5           | 11                   | 43             | 57.8                  | 218    | 25087  | 4.9  | Eukaryotic translation initiation factor 3 subunit K                                                                          |
| 1421                     | D320F5           | 11                   | 33             | 56.2                  | 297    | 33592  | 6    | Uncharacterized protein                                                                                                       |
| 1421                     | Q88545           | 11                   | 33             | 51.5                  | 324    | 35880  | 5.7  | COP9 signalosome complex subunit 6                                                                                            |
| 1422                     | Q55234           | 11                   | 34             | 49.6                  | 264    | 28532  | 7    | Proteasome subunit beta type-5                                                                                                |
| 1423                     | P70195           | 11                   | 55             | 48.4                  | 277    | 29891  | 8    | Proteasome subunit beta type-7                                                                                                |
| 1424                     | Q80ZP8           | 11                   | 27             | 52.1                  | 165    | 19012  | 8.1  | Armet protein                                                                                                                 |
| 1424                     | P0C5H9           | 11                   | 27             | 48                    | 179    | 20388  | 8.3  | Mesencephalic astrocyte-derived neurotrophic factor                                                                           |
| 1425                     | P70122           | 11                   | 24             | 46.8                  | 250    | 28781  | 8.8  | Ribosome maturation protein SBDS                                                                                              |
| 1426                     | E9PXX7           | 11                   | 21             | 46.2                  | 344    | 38532  | 5.4  | Uncharacterized protein                                                                                                       |
| 1426                     | Q91W90           | 11                   | 21             | 38.1                  | 417    | 46416  | 5.8  | Thioredoxin domain-containing protein 5                                                                                       |
| 1427                     | Q8C845           | 11                   | 48             | 45.8                  | 240    | 26800  | 5.1  | EF hand domain containing 2                                                                                                   |
| 1428                     | Q8BTQ1           | 11                   | 53             | 47.2                  | 305    | 33757  | 9.6  | Putative uncharacterized protein (Fragment)                                                                                   |
| 1428                     | Q3UFF9           | 11                   | 53             | 44.2                  | 326    | 36150  | 8.9  | Putative uncharacterized protein                                                                                              |
| 1428                     | Q8BW03           | 11                   | 53             | 44.2                  | 326    | 36153  | 9    | Putative uncharacterized protein                                                                                              |
| 1428                     | Q8BM84           | 11                   | 53             | 44.2                  | 326    | 36197  | 9.2  | Putative uncharacterized protein<br>ELAV (Embryonic lethal, abnormal vision, Drosophila)-like 1 (Hu antigen R), isoform CRA_a |
| 1428                     | Q78QY3           | 11                   | 53             | 44.2                  | 326    | 36169  | 9    | antigen R), isoform CRA_a                                                                                                     |
| 1429                     | Q61792           | 11                   | 99             | 42.6                  | 263    | 29994  | 7    | LIM and SH3 domain protein 1                                                                                                  |
| 1430                     | UPI0001E6B7EC    | 11                   | 86             | 38.9                  | 296    | 33955  | 9.5  | PREDICTED: 60S ribosomal protein L5-like isoform 2                                                                            |
| 1430                     | P47962           | 11                   | 86             | 38.7                  | 297    | 34401  | 9.8  | 60S ribosomal protein L5                                                                                                      |
| 1430                     | Q3U850           | 11                   | 86             | 38.7                  | 297    | 34357  | 9.8  | Putative uncharacterized protein                                                                                              |
| 1431                     | Q89053           | 11                   | 16             | 37.3                  | 461    | 50989  | 6.5  | Coronin-1A                                                                                                                    |
| 1431                     | Q3U232           | 11                   | 16             | 37.3                  | 461    | 50959  | 6.5  | Putative uncharacterized protein                                                                                              |
| 1432                     | Q9WUM3           | 11                   | 19             | 30.6                  | 484    | 53912  | 5.8  | Coronin-1B                                                                                                                    |
| 1433                     | P80317           | 11                   | 24             | 29.9                  | 531    | 58004  | 7.1  | T-complex protein 1 subunit zeta                                                                                              |
| 1433                     | Q52KG9           | 11                   | 24             | 29.9                  | 531    | 58076  | 6.9  | Chaperonin containing Tcp1, subunit 6a (Zeta)                                                                                 |
| 1433                     | Q3TIX8           | 11                   | 24             | 29.9                  | 531    | 58103  | 6.9  | Putative uncharacterized protein                                                                                              |
| 1434                     | Q88487           | 11                   | 28             | 30.4                  | 612    | 68394  | 5.3  | Cytoplasmic dynein 1 intermediate chain 2                                                                                     |
| 1434                     | D6Q0F7           | 11                   | 28             | 30.1                  | 618    | 69206  | 5.3  | Cytoplasmic dynein intermediate chain 2 isoform 2.5                                                                           |
| 1434                     | Q3TPJ8           | 11                   | 28             | 29.4                  | 632    | 70613  | 5.2  | Dynein cytoplasmic 1 intermediate chain 2                                                                                     |
| 1434                     | A2BFF9           | 11                   | 28             | 29.2                  | 638    | 71424  | 5.2  | Dynein cytoplasmic 1 intermediate chain 2                                                                                     |
| 1434                     | D6Q0F6           | 11                   | 28             | 28.6                  | 650    | 72801  | 5.2  | Cytoplasmic dynein intermediate chain 2 isoform 2.2                                                                           |
| 1434                     | D6Q0F5           | 11                   | 28             | 28.4                  | 655    | 73319  | 5.2  | Cytoplasmic dynein intermediate chain 2 isoform 2.1                                                                           |
| 1435                     | Q3TI63           | 11                   | 35             | 25.1                  | 522    | 58999  | 5.2  | Putative uncharacterized protein                                                                                              |
| 1435                     | Q3U4S1           | 11                   | 35             | 25.1                  | 522    | 59012  | 5.2  | Putative uncharacterized protein                                                                                              |
| 1436                     | Q3TX27           | 11                   | 39             | 24.8                  | 650    | 72416  | 5.3  | Arginyl aminopeptidase (Aminopeptidase B), isoform CRA_a                                                                      |
| 1436                     | Q8VCT3           | 11                   | 39             | 24.8                  | 650    | 72343  | 5.3  | Aminopeptidase B                                                                                                              |
| 1437                     | A2A6U3           | 11                   | 28             | 23                    | 565    | 63773  | 8.3  | Septin 9                                                                                                                      |
| 1437                     | Q80UGS-3         | 11                   | 28             | 22.6                  | 576    | 64775  | 7.5  | Isoform 3 of Septin-9                                                                                                         |
| 1437                     | Q80UG5           | 11                   | 28             | 22.3                  | 583    | 65575  | 8.9  | Septin-9                                                                                                                      |
| 1438                     | Q99JF8           | 11                   | 35             | 22                    | 528    | 59697  | 9.1  | PC4 and SFRS1-interacting protein                                                                                             |
| 1439                     | Q5SUR0           | 11                   | 16             | 14.4                  | 1337   | 144629 | 5.7  | Phosphoribosylformylglycinamide synthase                                                                                      |
| 1440                     | Q9DBR7           | 11                   | 47             | 13.4                  | 1029   | 114996 | 5.5  | Protein phosphatase 1 regulatory subunit 12A                                                                                  |
| 1441                     | Q59IW6           | 11                   | 41             | 11.5                  | 1179   | 129538 | 9.6  | Target of Nesh-SH3 variant 5                                                                                                  |
| 1442                     | A2AJY2           | 11                   | 43             | 11.2                  | 1345   | 138292 | 4.9  | Procollagen type XV                                                                                                           |
| 1442                     | Q35206           | 11                   | 43             | 11                    | 1367   | 140472 | 4.9  | Collagen alpha-1(XV) chain                                                                                                    |
| 1443                     | B5THE2           | 11                   | 13             | 8                     | 1827   | 208548 | 5.9  | Maltase-glucoamylase                                                                                                          |
| 1444                     | P10599           | 11                   | 356            | 91.4                  | 105    | 11737  | 4.9  | Thioredoxin                                                                                                                   |
| 1445                     | P06703           | 11                   | 294            | 91.1                  | 90     | 10180  | 5.5  | Protein S100-A6                                                                                                               |
| 1446                     | P30046           | 11                   | 128            | 90.7                  | 118    | 12712  | 7.3  | D-dopachrome decarboxylase                                                                                                    |
| 1447                     | Q9BVJ7           | 11                   | 39             | 85.3                  | 150    | 16588  | 8.2  | Dual specificity protein phosphatase 23                                                                                       |
| 1448                     | P15374           | 11                   | 26             | 81.3                  | 230    | 26183  | 4.9  | Ubiquitin carboxyl-terminal hydrolase isozyme L3                                                                              |
| 1449                     | Q96EK6           | 11                   | 63             | 80.4                  | 184    | 20749  | 8    | Glucosamine 6-phosphate N-acetyltransferase                                                                                   |
| 1450                     | Q9ULC4           | 11                   | 72             | 80.1                  | 181    | 20555  | 8.8  | Malignant T cell-amplified sequence 1                                                                                         |
| 1451                     | P51148           | 11                   | 57             | 78.2                  | 216    | 23483  | 8.4  | Ras-related protein Rab-5C                                                                                                    |
| 1452                     | Q04917           | 11                   | 49             | 77.6                  | 246    | 28219  | 4.8  | 14-3-3 protein eta                                                                                                            |
| 1453                     | P09936           | 11                   | 83             | 75.3                  | 223    | 24824  | 5.5  | Ubiquitin carboxyl-terminal hydrolase isozyme L1                                                                              |
| 1454                     | Q15102           | 11                   | 24             | 75.3                  | 231    | 25734  | 6.8  | Platelet-activating factor acetylhydrolase IB subunit gamma                                                                   |
| 1455                     | P49721           | 11                   | 53             | 74.1                  | 201    | 22836  | 7    | Proteasome subunit beta type-2                                                                                                |
| 1456                     | Q9H2H8           | 11                   | 31             | 72.7                  | 161    | 18155  | 6.8  | Peptidyl-prolyl cis-trans isomerase-like 3                                                                                    |
| 1456                     | UPI000188195B    | 11                   | 31             | 65                    | 180    | 20272  | 7.4  | UPI000188195B UniRef100 entry                                                                                                 |
| 1457                     | P31947           | 11                   | 30             | 70.2                  | 248    | 27774  | 4.7  | 14-3-3 protein sigma                                                                                                          |
| 1458                     | Q9UL26           | 11                   | 21             | 68.6                  | 194    | 21855  | 8.2  | Ras-related protein Rab-22A                                                                                                   |
| 1459                     | Q8WZA0           | 11                   | 34             | 68.4                  | 190    | 21495  | 4.9  | Protein LZIC                                                                                                                  |
| 1460                     | Q8TCD5           | 11                   | 38             | 66.2                  | 201    | 23383  | 6.6  | 5'(3')-deoxyribonucleotidase, cytosolic type                                                                                  |
| 1461                     | P32969           | 11                   | 57             | 66.1                  | 192    | 21863  | 10   | 60S ribosomal protein L9                                                                                                      |
| 1462                     | A5YM50           | 11                   | 83             | 65.1                  | 218    | 24517  | 6.2  | RAB11B protein                                                                                                                |
| 1462                     | Q15907           | 11                   | 83             | 65.1                  | 218    | 24488  | 5.9  | Ras-related protein Rab-11B                                                                                                   |
| 1463                     | Q9Y2B0           | 11                   | 50             | 64.8                  | 182    | 20652  | 4.9  | Protein canopy log 2                                                                                                          |
| 1464                     | Q9BY32           | 11                   | 40             | 63.4                  | 194    | 21446  | 5.6  | Inosine triphosphate pyrophosphatase                                                                                          |
| 1465                     | Q9UBP6           | 11                   | 18             | 63.4                  | 276    | 31471  | 7.6  | tRNA (guanine-N(7)-methyltransferase                                                                                          |
| 1466                     | Q9UK41           | 11                   | 25             | 61.1                  | 221    | 25425  | 5.5  | Vacuolar protein sorting-associated protein 28 log                                                                            |
| 1467                     | Q13257           | 11                   | 42             | 61                    | 205    | 23510  | 5.1  | Mitotic spindle assembly checkpoint protein MAD2A                                                                             |
| 1468                     | Q96E15           | 11                   | 26             | 59.5                  | 215    | 24647  | 5.2  | Transcription elongation factor A protein-like 4                                                                              |
| 1468                     | Q96E15-2         | 11                   | 26             | 35.8                  | 358    | 40578  | 7.4  | Isoform 2 of Transcription elongation factor A protein-like 4                                                                 |
| 1469                     | P32119           | 11                   | 51             | 58.6                  | 198    | 21892  | 6    | Peroxiredoxin-2                                                                                                               |
| 1470                     | P24941           | 11                   | 19             | 56                    | 298    | 33930  | 8.7  | Cyclin-dependent kinase 2                                                                                                     |
| 1471                     | Q13868           | 11                   | 33             | 56                    | 293    | 32789  | 7.5  | Exosome complex exonuclease RRP4                                                                                              |
| 1472                     | Q00169           | 11                   | 28             | 55.6                  | 270    | 31806  | 6.5  | Phosphatidylinositol transfer protein alpha isoform                                                                           |
| 1473                     | Q8NCW5           | 11                   | 41             | 59                    | 288    | 31675  | 7.7  | Apolipoprotein A-I-binding protein<br>cDNA FLJ56357, highly similar to sapiens apolipoprotein A-I                             |
| 1473                     | B4DP80           | 11                   | 41             | 55.4                  | 307    | 33628  | 8.7  | binding protein (APOA1BP), mRNA                                                                                               |
| 1474                     | Q9BVM2           | 11                   | 18             | 54.2                  | 203    | 23240  | 9    | Protein DPCD                                                                                                                  |
| 1475                     | Q86V81           | 11                   | 78             | 54.1                  | 257    | 26888  | 11.2 | THO complex subunit 4                                                                                                         |
| 1476                     | P30040           | 11                   | 24             | 54                    | 261    | 28993  | 7.3  | Endoplasmic reticulum resident protein 29                                                                                     |
| 1477                     | A6NDG6           | 11                   | 36             | 53.9                  | 321    | 34006  | 6.1  | Phosphoglycolate phosphatase                                                                                                  |
| 1478                     | P45973           | 11                   | 69             | 53.4                  | 191    | 22225  | 5.9  | Chromobox protein log 5                                                                                                       |
| 1479                     | Q53FP0           | 11                   | 44             | 52.5                  | 261    | 29916  | 7.4  | Pyridoxine 5'-phosphate oxidase variant (Fragment)                                                                            |
| 1479                     | Q9NV59           | 11                   | 44             | 52.5                  | 261    | 29988  | 7.1  | Pyridoxine-5'-phosphate oxidase                                                                                               |
| 1480                     | P13716           | 11                   | 15             | 52.4                  | 330    | 36295  | 6.8  | Delta-aminolevulinic acid dehydratase                                                                                         |
| 1481                     | Q9P287           | 11                   | 28             | 51.6                  | 314    | 35979  | 4.6  | BRCA2 and CDKN1A-interacting protein                                                                                          |

Table S1. Proteins identified in the OVCAR-3 tumor supernatant by two or more unique peptides.

| Protein or Protein Group | Accession Number | Unique Peptide Count | Spectrum Count | Sequence Coverage (%) | Length | MolWt | pI   | Descriptive Name                                                                                                                                                                      |
|--------------------------|------------------|----------------------|----------------|-----------------------|--------|-------|------|---------------------------------------------------------------------------------------------------------------------------------------------------------------------------------------|
| 1482                     | Q8N8N7           | 11                   | 28             | 51                    | 351    | 38499 | 5.4  | Prostaglandin reductase 2<br>cDNA FLJ14554 fis, clone NT2RM2001839, highly similar to Calumenin                                                                                       |
| 1483                     | B3KNG6           | 11                   | 18             | 50.5                  | 315    | 37107 | 4.6  | Calumenin isoform 4                                                                                                                                                                   |
| 1483                     | D6QS48           | 11                   | 18             | 49.2                  | 323    | 38079 | 4.6  | Calumenin isoform 4                                                                                                                                                                   |
| 1484                     | Q9NZL4           | 11                   | 29             | 50.3                  | 362    | 39474 | 5.2  | Hsp70-binding protein 1                                                                                                                                                               |
| 1485                     | A6NMH6           | 11                   | 18             | 50                    | 430    | 49916 | 6.2  | Uncharacterized protein                                                                                                                                                               |
| 1485                     | UPI000020C588    | 11                   | 18             | 48.6                  | 442    | 51178 | 6.2  | septin-8 isoform c                                                                                                                                                                    |
| 1485                     | Q92599           | 11                   | 18             | 44.5                  | 483    | 55756 | 6.3  | Septin-8                                                                                                                                                                              |
| 1486                     | P67936           | 11                   | 38             | 49.6                  | 248    | 28522 | 4.7  | Tropomyosin alpha-4 chain                                                                                                                                                             |
| 1487                     | Q6FHU0           | 11                   | 30             | 49.6                  | 272    | 29696 | 5.8  | PSMB8 protein (Fragment)                                                                                                                                                              |
| 1487                     | P28062-2         | 11                   | 30             | 49.6                  | 272    | 29770 | 5.8  | Isoform 2 of Proteasome subunit beta type-8                                                                                                                                           |
| 1487                     | P28062           | 11                   | 30             | 48.9                  | 276    | 30354 | 7.8  | Proteasome subunit beta type-8                                                                                                                                                        |
| 1487                     | Q5QNR8           | 11                   | 30             | 48.9                  | 276    | 30354 | 7.4  | Proteasome subunit beta type                                                                                                                                                          |
| 1488                     | Q9BUF5           | 11                   | 17             | 48.7                  | 446    | 49857 | 4.9  | Tubulin beta-6 chain                                                                                                                                                                  |
| 1489                     | A8MUD9           | 11                   | 63             | 48.1                  | 208    | 24433 | 10.7 | Uncharacterized protein                                                                                                                                                               |
| 1489                     | P18124           | 11                   | 63             | 40.3                  | 248    | 29226 | 10.7 | 60S ribosomal protein L7                                                                                                                                                              |
| 1489                     | UPI00015E0367    | 11                   | 63             | 36.8                  | 272    | 32275 | 10.8 | 60S ribosomal protein L7.                                                                                                                                                             |
| 1490                     | B7Z8S7           | 11                   | 24             | 47.4                  | 378    | 41263 | 6.2  | Secernin 2, isoform CRA_b                                                                                                                                                             |
| 1490                     | Q9BU04           | 11                   | 24             | 44.6                  | 401    | 43530 | 6.2  | Ses2 protein (Fragment)                                                                                                                                                               |
| 1491                     | Q9NR45           | 11                   | 30             | 47.4                  | 359    | 40308 | 6.7  | Sialic acid synthase                                                                                                                                                                  |
| 1492                     | Q15293           | 11                   | 30             | 47.1                  | 331    | 38890 | 5    | Reticulocalbin-1                                                                                                                                                                      |
| 1493                     | A8K718           | 11                   | 26             | 47                    | 315    | 35116 | 6.8  | cDNA FLJ77502                                                                                                                                                                         |
| 1493                     | Q9H0W9           | 11                   | 26             | 47                    | 315    | 35117 | 6.7  | Ester hydrolase C11orf54                                                                                                                                                              |
| 1494                     | P49903           | 11                   | 24             | 46.4                  | 392    | 42911 | 6    | Selenide, water dikinase 1                                                                                                                                                            |
| 1495                     | Q9Y3A5           | 11                   | 25             | 46.4                  | 250    | 28764 | 8.7  | Ribosome maturation protein SBDS                                                                                                                                                      |
| 1496                     | Q13177           | 11                   | 18             | 45.4                  | 524    | 58043 | 6    | Serine/threonine-protein kinase PAK 2                                                                                                                                                 |
| 1497                     | O00233           | 11                   | 29             | 44.8                  | 223    | 24682 | 7    | 26S proteasome non-ATPase regulatory subunit 9                                                                                                                                        |
| 1498                     | Q96JL6           | 11                   | 22             | 44.8                  | 420    | 46291 | 7.2  | Mannose-1-phosphate guanylttransferase alpha<br>cDNA, FLJ93570, highly similar to sapiens phosphoribosyl pyrophosphate synthetase-associated protein 2 (PRPSAP2), mRNA                |
| 1499                     | B2R7R5           | 11                   | 19             | 44.7                  | 369    | 40884 | 7.4  | Phosphoribosyl pyrophosphate synthetase-associated protein 2                                                                                                                          |
| 1499                     | O60256           | 11                   | 19             | 44.7                  | 369    | 40926 | 7.4  | Phosphoribosyl pyrophosphate synthetase-associated protein 2<br>cDNA FLJ75682, highly similar to sapiens armadillo repeat containing, X-linked 3 (ARMCX3), transcript variant 1, mRNA |
| 1500                     | A8K5B0           | 11                   | 14             | 44.6                  | 379    | 42573 | 8.2  | Armadillo repeat-containing X-linked protein 3                                                                                                                                        |
| 1500                     | Q9UH62           | 11                   | 14             | 44.6                  | 379    | 42501 | 8.4  | Armadillo repeat-containing X-linked protein 3                                                                                                                                        |
| 1501                     | P42025           | 11                   | 25             | 43.4                  | 376    | 42293 | 6.4  | Beta-centractin                                                                                                                                                                       |
| 1502                     | O60547           | 11                   | 18             | 43.3                  | 372    | 41950 | 7.3  | GDP-mannose 4,6 dehydratase                                                                                                                                                           |
| 1503                     | P09012           | 11                   | 67             | 42.6                  | 282    | 31280 | 9.8  | U1 small nuclear ribonucleoprotein A                                                                                                                                                  |
| 1504                     | Q9729-3          | 11                   | 124            | 42.5                  | 285    | 30588 | 7.9  | Isoform 3 of Heterogeneous nuclear ribonucleoprotein A/B<br>cDNA, FLJ96419, highly similar to sapiens fructosamine-3-kinase-related protein (FN3KRP), mRNA                            |
| 1505                     | B2RD19           | 11                   | 21             | 42.4                  | 309    | 34352 | 7.3  | Ketosamine-3-kinase                                                                                                                                                                   |
| 1505                     | Q9HA64           | 11                   | 21             | 42.4                  | 309    | 34412 | 7.3  | Ketosamine-3-kinase                                                                                                                                                                   |
| 1506                     | O00154-6         | 11                   | 27             | 48.9                  | 329    | 36568 | 7.8  | Isoform 6 of Cytosolic acyl coenzyme A thioester hydrolase                                                                                                                            |
| 1506                     | O00154-4         | 11                   | 27             | 47.6                  | 338    | 37420 | 7.3  | Isoform 4 of Cytosolic acyl coenzyme A thioester hydrolase                                                                                                                            |
| 1506                     | O00154           | 11                   | 27             | 42.4                  | 380    | 41796 | 8.5  | Cytosolic acyl coenzyme A thioester hydrolase<br>cDNA FLJ50378, highly similar to Phenylalanyl-tRNA synthetase alpha chain (EC 6.1.1.20)                                              |
| 1507                     | B4E363           | 11                   | 20             | 42.3                  | 477    | 54158 | 7.8  | Phenylalanyl-tRNA synthetase alpha chain                                                                                                                                              |
| 1507                     | Q9Y285           | 11                   | 20             | 39.8                  | 508    | 57564 | 7.8  | Phenylalanyl-tRNA synthetase alpha chain                                                                                                                                              |
| 1508                     | O75937           | 11                   | 32             | 42.3                  | 253    | 29842 | 9.1  | DnaJ log subfamily C member 8                                                                                                                                                         |
| 1509                     | Q9NQ48           | 11                   | 18             | 42.1                  | 299    | 34592 | 5.4  | Leucine zipper transcription factor-like protein 1                                                                                                                                    |
| 1510                     | B5BUC0           | 11                   | 21             | 41.9                  | 420    | 46698 | 8.9  | Glycogen synthase kinase-3 beta (Fragment)                                                                                                                                            |
| 1510                     | P49841           | 11                   | 21             | 41.9                  | 420    | 46744 | 8.8  | Glycogen synthase kinase-3 beta                                                                                                                                                       |
| 1510                     | P49841-2         | 11                   | 21             | 40.6                  | 433    | 48034 | 8.8  | Isoform 2 of Glycogen synthase kinase-3 beta<br>Full-length cDNA clone CS0DI041YE05 of Placenta of sapiens (human)                                                                    |
| 1511                     | Q86TY5           | 11                   | 138            | 85.1                  | 121    | 13897 | 9.1  | Galectin-3                                                                                                                                                                            |
| 1511                     | P17931           | 11                   | 138            | 41.2                  | 250    | 26152 | 8.5  | Galectin-3                                                                                                                                                                            |
| 1511                     | Q59FR8           | 11                   | 138            | 39.9                  | 258    | 27118 | 8.4  | LGALS3 protein variant (Fragment)                                                                                                                                                     |
| 1512                     | Q9NZ32           | 11                   | 18             | 41.2                  | 417    | 46307 | 7.4  | Actin-related protein 10                                                                                                                                                              |
| 1513                     | Q86TX2           | 11                   | 15             | 41.1                  | 421    | 46277 | 7.3  | Acyl-coenzyme A thioesterase 1<br>cDNA, FLJ95164, highly similar to sapiens SEC14-like 2 (S. cerevisiae) (SEC14L2), mRNA                                                              |
| 1514                     | B2RAW8           | 11                   | 16             | 40.7                  | 403    | 46103 | 7.8  | SEC14-like protein 2                                                                                                                                                                  |
| 1514                     | O76054           | 11                   | 16             | 40.7                  | 403    | 46145 | 7.8  | SEC14-like protein 2                                                                                                                                                                  |
| 1515                     | Q8TCE6-2         | 11                   | 13             | 41.3                  | 349    | 39799 | 6.8  | Isoform 2 of Protein FAM45A                                                                                                                                                           |
| 1515                     | Q8TCE6           | 11                   | 13             | 40.3                  | 357    | 40513 | 6.6  | Protein FAM45A                                                                                                                                                                        |
| 1516                     | UPI0000E20EFA    | 11                   | 131            | 40.2                  | 291    | 33141 | 9.3  | RPS10-NUDT3 protein                                                                                                                                                                   |
| 1517                     | Q92890           | 11                   | 44             | 44.6                  | 307    | 34500 | 6.7  | Ubiquitin fusion degradation protein 1 log                                                                                                                                            |
| 1517                     | C9JS35           | 11                   | 44             | 39.9                  | 343    | 38688 | 6.7  | Uncharacterized protein                                                                                                                                                               |
| 1517                     | Q92890-1         | 11                   | 44             | 39.9                  | 343    | 38725 | 6.3  | Isoform Long of Ubiquitin fusion degradation protein 1 log                                                                                                                            |
| 1518                     | P55212           | 11                   | 34             | 39.9                  | 293    | 33310 | 6.9  | Caspase-6                                                                                                                                                                             |
| 1519                     | Q99933-3         | 11                   | 26             | 49.3                  | 274    | 31117 | 5.1  | Isoform 3 of BAG family molecular chaperone regulator 1                                                                                                                               |
| 1519                     | Q99933           | 11                   | 26             | 39.1                  | 345    | 38779 | 7.8  | BAG family molecular chaperone regulator 1                                                                                                                                            |
| 1520                     | A8K9A5           | 11                   | 17             | 39                    | 313    | 35815 | 7.2  | Thymidylate synthase                                                                                                                                                                  |
| 1520                     | Q53FB7           | 11                   | 17             | 39                    | 313    | 35717 | 6.8  | Thymidylate synthase (Fragment)                                                                                                                                                       |
| 1520                     | P04818           | 11                   | 17             | 39                    | 313    | 35716 | 7    | Thymidylate synthase                                                                                                                                                                  |
| 1521                     | Q13011           | 11                   | 30             | 39                    | 328    | 35816 | 8    | Delta(3,5)-Delta(2,4)-dienoyl-CoA isomerase, mitochondrial                                                                                                                            |
| 1522                     | Q8N335           | 11                   | 22             | 39                    | 351    | 38419 | 7    | Glycerol-3-phosphate dehydrogenase 1-like protein<br>cDNA FLJ36142 fis, clone TESTI2025006, highly similar to sapiens myo-inositol 1-phosphate synthase A1 (ISYNA1), mRNA             |
| 1523                     | B3KSG0           | 11                   | 30             | 47.3                  | 408    | 44772 | 5.8  | Isoform 2 of Inositol-3-phosphate synthase 1                                                                                                                                          |
| 1523                     | Q9NPH2-2         | 11                   | 30             | 44.9                  | 430    | 47146 | 5.4  | Isoform 2 of Inositol-3-phosphate synthase 1<br>cDNA FLJ34860 fis, clone NT2NE2012790, highly similar to sapiens myo-inositol 1-phosphate synthase A1 (ISYNA1), mRNA                  |
| 1523                     | B3KRT1           | 11                   | 30             | 38.3                  | 504    | 55155 | 5    | inositol-3-phosphate synthase 1 isoform 2                                                                                                                                             |
| 1523                     | UPI000013C7F4    | 11                   | 30             | 38.3                  | 504    | 55136 | 5    | inositol-3-phosphate synthase 1 isoform 2                                                                                                                                             |
| 1523                     | Q9NPH2           | 11                   | 30             | 34.6                  | 558    | 61068 | 5.7  | Inositol-3-phosphate synthase 1<br>cDNA FLJ78285, highly similar to sapiens gasdermin domain containing 1, mRNA                                                                       |
| 1524                     | A8K702           | 11                   | 25             | 38.2                  | 484    | 52820 | 5.1  | Gasdermin-D                                                                                                                                                                           |
| 1524                     | P57764           | 11                   | 25             | 38.2                  | 484    | 52801 | 5.1  | Gasdermin-D                                                                                                                                                                           |
| 1524                     | UPI0000E5AF91    | 11                   | 25             | 34.8                  | 532    | 57735 | 5.4  | UPI0000E5AF91 UniRef100 entry                                                                                                                                                         |
| 1525                     | Q7Z2Q5           | 11                   | 23             | 39.2                  | 429    | 46405 | 6.6  | C-terminal binding protein 1                                                                                                                                                          |
| 1525                     | Q13363           | 11                   | 23             | 38.2                  | 440    | 47535 | 6.8  | C-terminal-binding protein 1                                                                                                                                                          |
| 1526                     | Q9NXA8-2         | 11                   | 15             | 38.1                  | 299    | 32674 | 8.9  | Isoform 2 of NAD-dependent deacetylase sirtuin-5                                                                                                                                      |
| 1526                     | Q9NXA8           | 11                   | 15             | 36.8                  | 310    | 33881 | 8.5  | NAD-dependent deacetylase sirtuin-5                                                                                                                                                   |
| 1527                     | Q9BY67-2         | 11                   | 35             | 41.7                  | 333    | 36915 | 5.1  | Isoform 2 of Cell adhesion molecule 1                                                                                                                                                 |
| 1527                     | UPI0001AE6C86    | 11                   | 35             | 37.3                  | 373    | 41667 | 5    | UPI0001AE6C86 UniRef100 entry                                                                                                                                                         |
| 1527                     | A0A4Z1           | 11                   | 35             | 35.9                  | 387    | 42737 | 5.7  | CADM1 protein                                                                                                                                                                         |
| 1527                     | UPI00001FA3EC    | 11                   | 35             | 33.6                  | 414    | 45624 | 5.1  | cell adhesion molecule 1 isoform 2                                                                                                                                                    |
| 1527                     | A4FVB5           | 11                   | 35             | 33.5                  | 415    | 45780 | 5.1  | CADM1 protein (Fragment)                                                                                                                                                              |
| 1527                     | Q9BY67           | 11                   | 35             | 31.4                  | 442    | 48509 | 5.1  | Cell adhesion molecule 1<br>cDNA FLJ76053, highly similar to sapiens Ras-GTPase activating protein SH3 domain-binding protein 2 (G3BP2), transcript variant 3, mRNA                   |
| 1528                     | A8K6V7           | 11                   | 44             | 35.4                  | 449    | 50816 | 5.4  | Isoform B of Ras GTPase-activating protein-binding protein 2                                                                                                                          |
| 1528                     | Q9UN86-2         | 11                   | 44             | 35.4                  | 449    | 50817 | 5.4  | Isoform B of Ras GTPase-activating protein-binding protein 2                                                                                                                          |
| 1528                     | Q9UN86           | 11                   | 44             | 33                    | 482    | 54121 | 5.6  | Ras GTPase-activating protein-binding protein 2                                                                                                                                       |
| 1529                     | Q4VC03           | 11                   | 23             | 35.3                  | 660    | 72391 | 9.3  | PABPC4 protein                                                                                                                                                                        |

Table S1. Proteins identified in the OVCAR-3 tumor supernatant by two or more unique peptides.

| Protein or Protein Group | Accession Number | Unique Peptide Count | Spectrum Count | Sequence Coverage (%) | Length | MolWt  | pI  | Descriptive Name                                                                                                                                      |
|--------------------------|------------------|----------------------|----------------|-----------------------|--------|--------|-----|-------------------------------------------------------------------------------------------------------------------------------------------------------|
| 1529                     | Q6IQ30           | 11                   | 23             | 35.3                  | 660    | 72361  | 9.3 | PABPC4 protein                                                                                                                                        |
| 1530                     | Q96HE7           | 11                   | 15             | 35.3                  | 468    | 54393  | 5.7 | ERO1-like protein alpha                                                                                                                               |
|                          |                  |                      |                |                       |        |        |     | ERO1-like protein alpha precursor (EC 1.8.4.-) (ERO1-Lalpha) (Oxidoreductin-1-Lalpha) (Endoplasmic oxidoreductin-1-like protein) (ERO1-L).            |
| 1530                     | UPI0000407C2B    | 11                   | 15             | 35.3                  | 468    | 54404  | 5.9 |                                                                                                                                                       |
| 1531                     | Q99829           | 11                   | 32             | 33.9                  | 537    | 59059  | 5.8 | Copine-1                                                                                                                                              |
| 1532                     | A8K168           | 11                   | 25             | 33.6                  | 572    | 64136  | 6.1 | Malic enzyme                                                                                                                                          |
| 1532                     | P48163           | 11                   | 25             | 33.6                  | 572    | 64150  | 6.1 | NADP-dependent malic enzyme                                                                                                                           |
| 1533                     | B4DJQ5           | 11                   | 48             | 33.1                  | 535    | 60134  | 4.4 | cDNA FLJ59211, highly similar to Glucosidase 2 subunit beta                                                                                           |
| 1533                     | E7EQZ9           | 11                   | 48             | 33.1                  | 535    | 60192  | 4.4 | Uncharacterized protein                                                                                                                               |
| 1534                     | P25685           | 11                   | 25             | 32.6                  | 340    | 38044  | 8.6 | DnaJ log subfamily B member 1                                                                                                                         |
| 1534                     | Q6FI51           | 11                   | 25             | 32.6                  | 440    | 38010  | 8.6 | DNAJB1 protein                                                                                                                                        |
| 1535                     | Q9BPW0           | 11                   | 13             | 33.5                  | 484    | 55096  | 6.2 | Serine/threonine-protein phosphatase (Fragment)                                                                                                       |
| 1535                     | P53041           | 11                   | 13             | 32.5                  | 499    | 56879  | 6.3 | Serine/threonine-protein phosphatase 5                                                                                                                |
| 1536                     | B2RCS5           | 11                   | 40             | 31.5                  | 894    | 103920 | 5.5 | Actinin, alpha 2, isoform CRA_b                                                                                                                       |
| 1536                     | P35609           | 11                   | 40             | 31.5                  | 894    | 103854 | 5.5 | Alpha-actinin-2                                                                                                                                       |
| 1537                     | P52306           | 11                   | 20             | 31.5                  | 607    | 66317  | 5.3 | Rap1 GTPase-GDP dissociation stimulator 1                                                                                                             |
| 1537                     | UPI000049DFE5    | 11                   | 20             | 31.5                  | 607    | 66317  | 5.3 | rap1 GTPase-GDP dissociation stimulator 1 isoform 2                                                                                                   |
| 1537                     | UPI000004A01F    | 11                   | 20             | 31.4                  | 608    | 66388  | 5.3 | rap1 GTPase-GDP dissociation stimulator 1 isoform 1                                                                                                   |
| 1537                     | Q4DQI8           | 11                   | 20             | 31.4                  | 608    | 66316  | 5.4 | RAP1, GTP-GDP dissociation stimulator 1                                                                                                               |
| 1538                     | Q06203           | 11                   | 16             | 30.8                  | 517    | 57399  | 6.8 | Amidophosphoribosyltransferase                                                                                                                        |
| 1538                     | Q53H22           | 11                   | 16             | 30.8                  | 517    | 57385  | 6.8 | Amidophosphoribosyltransferase (Fragment)                                                                                                             |
| 1539                     | Q86X02           | 11                   | 16             | 30.3                  | 465    | 53010  | 6   | Cerebellar degeneration-related protein 2-like                                                                                                        |
|                          |                  |                      |                |                       |        |        |     | Serine/threonine-protein phosphatase 2A 65 kDa regulatory subunit                                                                                     |
| 1540                     | P30154           | 11                   | 41             | 29.5                  | 601    | 66214  | 4.9 | A beta isoform                                                                                                                                        |
|                          |                  |                      |                |                       |        |        |     | Isoform 2 of Serine/threonine-protein phosphatase 2A 65 kDa regulatory subunit A beta isoform                                                         |
| 1540                     | P30154-2         | 11                   | 41             | 26.5                  | 667    | 73585  | 5.1 | regulatory subunit A beta isoform                                                                                                                     |
| 1541                     | Q6DD88           | 11                   | 28             | 27.7                  | 541    | 60542  | 5.7 | Atlastin-3                                                                                                                                            |
| 1542                     | B3KUB9           | 11                   | 26             | 27.5                  | 527    | 62034  | 6   | SWAP-70 protein, isoform CRA_b                                                                                                                        |
| 1543                     | Q03252           | 11                   | 42             | 27.5                  | 600    | 67689  | 5.3 | Lamin-B2                                                                                                                                              |
| 1544                     | Q69YN2           | 11                   | 19             | 25.1                  | 538    | 60619  | 7.2 | CWF19-like protein 1                                                                                                                                  |
| 1545                     | O75475           | 11                   | 37             | 24.3                  | 530    | 60103  | 9.1 | PC4 and SFRS1-interacting protein                                                                                                                     |
|                          |                  |                      |                |                       |        |        |     | cDNA FLJ78634, highly similar to sapiens solute carrier family 34 (sodium phosphate), member 2 (SLC34A2), mRNA                                        |
| 1546                     | A8K9G0           | 11                   | 29             | 23.5                  | 689    | 75633  | 8.3 | Isoform 2 of Sodium-dependent phosphate transport protein 2B                                                                                          |
| 1546                     | O95436-2         | 11                   | 29             | 23.5                  | 689    | 75657  | 8.2 | TRM5 tRNA methyltransferase 5 log (S. cerevisiae)                                                                                                     |
| 1547                     | B2RN19           | 11                   | 14             | 22                    | 509    | 58256  | 8.6 | tRNA (guanine-N(1)-methyltransferase                                                                                                                  |
| 1547                     | Q32P41           | 11                   | 14             | 22                    | 509    | 58246  | 8.6 | Isoform 2 of Serine/threonine-protein phosphatase 4 regulatory subunit 3A                                                                             |
| 1548                     | Q6IN85-2         | 11                   | 43             | 21.8                  | 820    | 93896  | 4.9 | Serine/threonine-protein phosphatase 4 regulatory subunit 3A                                                                                          |
| 1548                     | Q6IN85           | 11                   | 43             | 21.5                  | 833    | 95368  | 4.9 | Peptidylprolyl isomerase domain and WD repeat-containing protein                                                                                      |
| 1549                     | Q96BP3           | 11                   | 13             | 20.9                  | 646    | 73575  | 7.1 | 1                                                                                                                                                     |
| 1550                     | UPI0001AE6E02    | 11                   | 38             | 17.6                  | 841    | 93626  | 5.3 | Actin filament-associated protein 1-like 2.                                                                                                           |
| 1551                     | P10253           | 11                   | 25             | 17.5                  | 952    | 105324 | 6   | Lysosomal alpha-glucosidase                                                                                                                           |
|                          |                  |                      |                |                       |        |        |     | cDNA FLJ78690, highly similar to sapiens protein phosphatase 4, regulatory subunit 1 (PPP4R1), mRNA                                                   |
| 1552                     | A8K923           | 11                   | 20             | 15.9                  | 933    | 105222 | 4.8 | Isoform 2 of Serine/threonine-protein phosphatase 4 regulatory subunit 1                                                                              |
| 1552                     | Q8TF05-2         | 11                   | 20             | 15.9                  | 933    | 105195 | 4.8 | Serine/threonine-protein phosphatase 4 regulatory subunit 1                                                                                           |
| 1552                     | Q8TF05           | 11                   | 20             | 15.6                  | 950    | 107004 | 4.8 | UPI0000EE3A32 UniRef100 entry                                                                                                                         |
| 1553                     | UPI0000EE3A32    | 11                   | 15             | 15.6                  | 1235   | 140288 | 5.5 | Uncharacterized protein                                                                                                                               |
| 1553                     | C9JIP0           | 11                   | 15             | 14.7                  | 1316   | 149001 | 5.6 | Nuclear pore complex protein Nup160                                                                                                                   |
| 1553                     | Q12769           | 11                   | 15             | 13.4                  | 1436   | 162121 | 5.5 | Myosin phosphatase Rho-interacting protein                                                                                                            |
| 1554                     | Q6WQC1           | 11                   | 24             | 14.6                  | 1025   | 116533 | 6.2 | Myosin phosphatase Rho interacting protein                                                                                                            |
| 1554                     | B9EG12           | 11                   | 24             | 14.5                  | 1037   | 118047 | 6.4 | Isoform 2 of Myosin phosphatase Rho-interacting protein                                                                                               |
| 1554                     | Q6WQC1-2         | 11                   | 24             | 14.5                  | 1038   | 118103 | 6.4 | Prostaglandin F2 receptor negative regulator                                                                                                          |
| 1555                     | Q9P2B2           | 11                   | 11             | 14.3                  | 879    | 98556  | 6.6 | Ubiquitin carboxyl-terminal hydrolase                                                                                                                 |
| 1556                     | B4DKA8           | 11                   | 14             | 15.5                  | 1012   | 115080 | 8.5 | Ubiquitin carboxyl-terminal hydrolase                                                                                                                 |
| 1556                     | A8K8N5           | 11                   | 14             | 14                    | 1118   | 127493 | 8.6 | Ubiquitin carboxyl-terminal hydrolase 8                                                                                                               |
| 1556                     | P40818           | 11                   | 14             | 14                    | 1118   | 127523 | 8.5 | cDNA FLJ78679, highly similar to sapiens DEAD (Asp-Glu-Ala-Asp) box polypeptide 46 (DDX46), mRNA                                                      |
| 1557                     | A8K6X3           | 11                   | 36             | 13.6                  | 1032   | 117471 | 9.3 | Isoform 2 of Solute carrier family 12 member 2                                                                                                        |
| 1558                     | P55011-3         | 11                   | 26             | 13.4                  | 1196   | 129679 | 6.5 | Solute carrier family 12 member 2                                                                                                                     |
| 1558                     | P55011           | 11                   | 26             | 13.2                  | 1212   | 131447 | 6.4 | Phosphoinositide-3-kinase, regulatory subunit 4                                                                                                       |
| 1559                     | A0JP11           | 11                   | 12             | 12.2                  | 1358   | 153158 | 7.2 | Phosphoinositide 3-kinase regulatory subunit 4                                                                                                        |
| 1559                     | Q99570           | 11                   | 12             | 12.2                  | 1358   | 153103 | 7.2 | cDNA, FLJ94957, highly similar to sapiens phosphoinositide-3-kinase, regulatory subunit 4, p150 (PIK3R4), mRNA                                        |
| 1559                     | B2RAJ6           | 11                   | 12             | 12.2                  | 1358   | 153191 | 7.2 | Adenosine deaminase, RNA-specific isoform ADAR-a variant (Fragment)                                                                                   |
| 1560                     | Q59EC0           | 11                   | 22             | 11.7                  | 1244   | 137833 | 8.5 | Phospholipase C, gamma 1                                                                                                                              |
| 1561                     | A2A284           | 11                   | 12             | 11.5                  | 1291   | 148660 | 6   | 1-phosphatidylinositol-4,5-bisphosphate phosphodiesterase gamma-1                                                                                     |
| 1561                     | P19174           | 11                   | 12             | 11.5                  | 1290   | 148532 | 6   | PLCG1 variant protein (Fragment)                                                                                                                      |
| 1561                     | Q4LE43           | 11                   | 12             | 10.5                  | 1412   | 161302 | 7.2 | Cleavage and polyadenylation specificity factor subunit 1                                                                                             |
| 1562                     | Q10570           | 11                   | 15             | 10.6                  | 1443   | 160883 | 6.4 | Isoform Short of Tight junction protein ZO-1                                                                                                          |
| 1563                     | Q07157-2         | 11                   | 47             | 10.7                  | 1668   | 186965 | 6.8 | Tight junction protein ZO-1 (Zonula occludens 1 protein) (Zona occludens 1 protein) (Tight junction protein 1).                                       |
| 1563                     | UPI0000E59B99    | 11                   | 47             | 10.6                  | 1692   | 189674 | 6.7 | Tight junction protein ZO-1 (Zonula occludens 1 protein) (Zona occludens 1 protein) (Tight junction protein 1).                                       |
| 1563                     | UPI0001AE689D    | 11                   | 47             | 10.4                  | 1727   | 193249 | 6.8 | Tight junction protein ZO-1 (Fragment)                                                                                                                |
| 1563                     | A9CQZ8           | 11                   | 47             | 10.2                  | 1761   | 196814 | 6.6 | Tight junction protein ZO-1                                                                                                                           |
| 1563                     | Q07157           | 11                   | 47             | 10.2                  | 1748   | 195457 | 6.7 | Sterile alpha motif domain-containing protein 9                                                                                                       |
| 1564                     | Q5K651           | 11                   | 14             | 10.2                  | 1589   | 184280 | 7.8 | Zinc finger, NFX1-type containing 1, isoform CRA_b                                                                                                    |
| 1565                     | E1P614           | 11                   | 14             | 8.2                   | 1918   | 220246 | 7.3 | NFX1-type zinc finger-containing protein 1                                                                                                            |
| 1565                     | Q9P2E3           | 11                   | 14             | 8.2                   | 1918   | 220225 | 7.3 | Structural maintenance of chromosomes flexible hinge domain-containing protein 1                                                                      |
| 1566                     | A6NHR9           | 11                   | 14             | 6.8                   | 2005   | 226372 | 7.3 | Chondroitin sulfate proteoglycan 4                                                                                                                    |
| 1567                     | Q6UVK1           | 11                   | 11             | 6.5                   | 2322   | 250534 | 5.5 | Centromere protein F                                                                                                                                  |
| 1568                     | P49454           | 11                   | 23             | 3.9                   | 3210   | 367765 | 5.1 | E3 ubiquitin-protein ligase HERC2                                                                                                                     |
| 1569                     | Q95714           | 11                   | 12             | 3.1                   | 4834   | 527234 | 6.3 |                                                                                                                                                       |
| 1570                     | O14950           | 10                   | 133            | 79.7                  | 172    | 19779  | 4.8 | Myosin regulatory light chain 12B Myosin regulatory light chain 12B Cellular retinoic acid-binding protein 1 Cellular retinoic acid-binding protein 1 |
| 1571                     | P29762           | 10                   | 69             | 78.1                  | 137    | 15566  | 5.4 | SUMO-conjugating enzyme UBC9 SUMO-conjugating enzyme UBC9                                                                                             |
| 1572                     | P63279           | 10                   | 86             | 70.3                  | 158    | 18007  | 8.7 | Eukaryotic translation initiation factor 5A-1 Eukaryotic translation initiation factor 5A-1                                                           |
| 1573                     | P63241           | 10                   | 427            | 68.8                  | 154    | 16832  | 5.2 | Isoform 2 of Eukaryotic translation initiation factor 5A-1                                                                                            |
| 1573                     | P63241-2         | 10                   | 427            | 57.6                  | 184    | 20170  | 7   | Protein mago nashi log Protein mago nashi log                                                                                                         |
| 1574                     | P61326           | 10                   | 188            | 68.5                  | 146    | 17164  | 6.1 | Protein mago nashi log 1-related                                                                                                                      |
| 1574                     | Q9CQL1           | 10                   | 188            | 68.5                  | 146    | 17092  | 6.4 | Protein mago nashi log 2                                                                                                                              |
| 1574                     | Q96A72           | 10                   | 188            | 67.6                  | 148    | 17276  | 6.4 | Neuronal calcium sensor 1 Neuronal calcium sensor 1                                                                                                   |
| 1575                     | P62166           | 10                   | 24             | 67.4                  | 190    | 21879  | 4.8 |                                                                                                                                                       |

Table S1. Proteins identified in the OVCAR-3 tumor supernatant by two or more unique peptides.

| Protein or Protein Group | Accession Number | Unique Peptide Count | Spectrum Count | Sequence Coverage (%) | Length | MolWt | pI   | Descriptive Name                                                                                                             |
|--------------------------|------------------|----------------------|----------------|-----------------------|--------|-------|------|------------------------------------------------------------------------------------------------------------------------------|
| 1576                     | P28066           | 10                   | 172            | 66                    | 241    | 26411 | 4.8  | Proteasome subunit alpha type-5 Proteasome subunit alpha type-5                                                              |
| 1576                     | Q3TUX3           | 10                   | 172            | 66                    | 241    | 26397 | 4.8  | Proteasome subunit alpha type                                                                                                |
| 1577                     | P25789           | 10                   | 52             | 62.1                  | 261    | 29484 | 7.7  | Proteasome subunit alpha type-4                                                                                              |
| 1577                     | Q9R1P0           | 10                   | 52             | 62.1                  | 261    | 29471 | 7.7  | Proteasome subunit alpha type-4                                                                                              |
| 1578                     | P61601           | 10                   | 35             | 59.1                  | 193    | 22245 | 5.4  | Neurocalcin-delta Neurocalcin-delta                                                                                          |
| 1579                     | P61586           | 10                   | 267            | 56                    | 193    | 21768 | 6.1  | Transforming protein RhoA                                                                                                    |
| 1579                     | Q9QUJ0           | 10                   | 267            | 56                    | 193    | 21782 | 6.1  | Transforming protein RhoA                                                                                                    |
| 1580                     | P61026           | 10                   | 58             | 54                    | 200    | 22541 | 8.4  | Ras-related protein Rab-10 Ras-related protein Rab-10                                                                        |
| 1581                     | Q861U5           | 10                   | 204            | 61.8                  | 131    | 15398 | 10.4 | Similar to 40S ribosomal protein S18 (Fragment)                                                                              |
| 1581                     | P62269           | 10                   | 204            | 53.3                  | 152    | 17719 | 11   | 40S ribosomal protein S18 40S ribosomal protein S18                                                                          |
| 1581                     | Q5SVZ5           | 10                   | 204            | 53.3                  | 152    | 17749 | 10.9 | MCG116671                                                                                                                    |
| 1582                     | O43447           | 10                   | 86             | 52.5                  | 177    | 19208 | 8.1  | Peptidyl-prolyl cis-trans isomerase H Peptidyl-prolyl cis-trans isomerase H                                                  |
| 1583                     | D2HUN9           | 10                   | 81             | 51.9                  | 208    | 24173 | 10.3 | 40S ribosomal protein S8 (Fragment)                                                                                          |
| 1583                     | UPI00001C4753    | 10                   | 81             | 51.9                  | 208    | 24152 | 10.2 | UPI00001C4753 UniRef100 entry                                                                                                |
| 1583                     | P62241           | 10                   | 81             | 51.9                  | 208    | 24205 | 10.3 | 40S ribosomal protein S8 40S ribosomal protein S8                                                                            |
| 1584                     | O00743           | 10                   | 29             | 48.2                  | 305    | 35144 | 5.7  | Serine/threonine-protein phosphatase 6 catalytic subunit                                                                     |
| 1584                     | Q9CQR6           | 10                   | 29             | 48.2                  | 305    | 35159 | 5.7  | Serine/threonine-protein phosphatase 6 catalytic subunit                                                                     |
| 1585                     | P61254           | 10                   | 95             | 46.2                  | 145    | 17258 | 10.6 | 60S ribosomal protein L26 60S ribosomal protein L26                                                                          |
| 1585                     | Q6IBH6           | 10                   | 95             | 46.2                  | 145    | 17244 | 10.6 | RPL26 protein                                                                                                                |
| 1586                     | B2R6K4           | 10                   | 28             | 44.4                  | 340    | 37301 | 6.2  | cDNA, FLJ92996, highly similar to sapiens guanine nucleotide binding protein (G protein), beta polypeptide 1 (GNB1), mRNA    |
| 1586                     | P62873           | 10                   | 28             | 44.4                  | 340    | 37377 | 6    | Guanine nucleotide-binding protein G(I)/G(S)/G(T) subunit beta-1                                                             |
| 1587                     | P61962           | 10                   | 46             | 38.3                  | 342    | 38926 | 5.5  | Guanine nucleotide-binding protein G(I)/G(S)/G(T) subunit beta-1                                                             |
| 1588                     | O14979-3         | 10                   | 204            | 37.3                  | 244    | 27191 | 8.6  | DDB1- and CUL4-associated factor 7 DDB1- and CUL4-associated factor 7                                                        |
| 1588                     | B4DTA2           | 10                   | 204            | 33.6                  | 271    | 30214 | 8.7  | Isoform 3 of Heterogeneous nuclear ribonucleoprotein D-like                                                                  |
| 1588                     | Q9Z130           | 10                   | 204            | 30.2                  | 301    | 33559 | 7.3  | cDNA FLJ60148, highly similar to sapiens heterogeneous nuclear ribonucleoprotein D-like (HNRPDL), transcript variant 2, mRNA |
| 1588                     | O14979-2         | 10                   | 204            | 30.2                  | 301    | 33589 | 7.3  | Heterogeneous nuclear ribonucleoprotein D-like                                                                               |
| 1588                     | UPI00015AA288    | 10                   | 204            | 28.2                  | 323    | 35648 | 7.8  | Isoform 2 of Heterogeneous nuclear ribonucleoprotein D-like                                                                  |
| 1588                     | O14979           | 10                   | 204            | 21.7                  | 420    | 46437 | 9.6  | UPI00015AA288 UniRef100 entry                                                                                                |
| 1588                     | D3YTQ3           | 10                   | 204            | 21.7                  | 420    | 46270 | 9.6  | Heterogeneous nuclear ribonucleoprotein D-like                                                                               |
| 1589                     | A8K4L9           | 10                   | 28             | 33.2                  | 392    | 43449 | 8    | Uncharacterized protein                                                                                                      |
| 1589                     | P70318           | 10                   | 28             | 33.2                  | 392    | 43389 | 8    | cDNA FLJ75459                                                                                                                |
| 1590                     | B7ZBW3           | 10                   | 470            | 24.4                  | 463    | 50390 | 9    | Nucleolysin TIAR                                                                                                             |
| 1590                     | Q05639           | 10                   | 470            | 24.4                  | 463    | 50470 | 9    | Elongation factor 1-alpha                                                                                                    |
| 1590                     | P62631           | 10                   | 470            | 24.4                  | 463    | 50454 | 9    | Elongation factor 1-alpha 2                                                                                                  |
| 1591                     | Q9JUU8           | 10                   | 26             | 87.7                  | 114    | 12811 | 4.9  | Elongation factor 1-alpha 2                                                                                                  |
| 1592                     | Q9CQV8           | 10                   | 107            | 82.9                  | 246    | 28086 | 4.8  | Elongation factor 1-alpha 2                                                                                                  |
| 1593                     | P62965           | 10                   | 67             | 78.1                  | 137    | 15592 | 5.4  | SH3 domain-binding glutamic acid-rich-like protein                                                                           |
| 1594                     | P70296           | 10                   | 32             | 74.3                  | 187    | 20830 | 5.4  | 14-3-3 protein beta/alpha                                                                                                    |
| 1594                     | Q3TGC5           | 10                   | 32             | 74.3                  | 187    | 20889 | 5.6  | Cellular retinoic acid-binding protein 1                                                                                     |
| 1595                     | Q9CQ60           | 10                   | 29             | 71.2                  | 257    | 27254 | 5.8  | Phosphatidylethanolamine-binding protein 1                                                                                   |
| 1596                     | Q9JKB1           | 10                   | 22             | 70.9                  | 230    | 26152 | 5    | Putative uncharacterized protein                                                                                             |
| 1597                     | Q61599           | 10                   | 40             | 69.5                  | 200    | 22851 | 5.1  | 6-phosphogluconolactonase                                                                                                    |
| 1598                     | O70456           | 10                   | 20             | 66.9                  | 248    | 27713 | 4.8  | Ubiquitin carboxyl-terminal hydrolase isozyme L3                                                                             |
| 1598                     | Q3TEZ1           | 10                   | 20             | 66.9                  | 248    | 27706 | 4.8  | Rho GDP-dissociation inhibitor 2                                                                                             |
| 1599                     | P45591           | 10                   | 247            | 66.9                  | 166    | 18710 | 7.9  | 14-3-3 protein sigma                                                                                                         |
| 1600                     | P51410           | 10                   | 42             | 65.1                  | 192    | 21881 | 10   | Stratifin                                                                                                                    |
| 1600                     | UPI0000026075    | 10                   | 42             | 65.1                  | 192    | 21853 | 9.9  | Cofilin-2                                                                                                                    |
| 1601                     | Q9R0Y5           | 10                   | 48             | 63.4                  | 194    | 21540 | 5.8  | 60S ribosomal protein L9                                                                                                     |
| 1601                     | Q9R0Y5-2         | 10                   | 48             | 58.6                  | 210    | 23116 | 5.8  | UPI0000026075 UniRef100 entry                                                                                                |
| 1602                     | P30412           | 10                   | 27             | 63.2                  | 212    | 22794 | 7.5  | Adenylate kinase isoenzyme 1                                                                                                 |
| 1603                     | Q09528           | 10                   | 79             | 61                    | 182    | 21067 | 5.9  | Isoform 2 of Adenylate kinase isoenzyme 1                                                                                    |
| 1604                     | Q9R0P3           | 10                   | 23             | 61                    | 282    | 31320 | 7.1  | Peptidyl-prolyl cis-trans isomerase C                                                                                        |
| 1605                     | P99029-2         | 10                   | 79             | 73.5                  | 162    | 17015 | 7.9  | Ferritin heavy chain                                                                                                         |
| 1605                     | P99029           | 10                   | 79             | 56.7                  | 210    | 21897 | 8.9  | S-formylglutathione hydrolase                                                                                                |
| 1606                     | P48428           | 10                   | 21             | 54.6                  | 108    | 12758 | 5.3  | Isoform Cytoplasmic+peroxisomal of Peroxiredoxin-5, mitochondrial                                                            |
| 1607                     | O09061           | 10                   | 63             | 54.2                  | 240    | 26372 | 7.8  | Peroxiredoxin-5, mitochondrial                                                                                               |
| 1608                     | P24369           | 10                   | 46             | 52.8                  | 216    | 23713 | 9.6  | Tubulin-specific chaperone A                                                                                                 |
| 1609                     | Q5FWB6           | 10                   | 54             | 51.4                  | 317    | 34186 | 6.2  | Proteasome subunit beta type-1                                                                                               |
| 1610                     | P48758           | 10                   | 29             | 50.9                  | 277    | 30641 | 8.3  | Peptidyl-prolyl cis-trans isomerase B                                                                                        |
| 1611                     | Q91V64           | 10                   | 35             | 49.8                  | 297    | 32033 | 7.4  | MCG17387, isoform CRA_a                                                                                                      |
| 1612                     | Q9R1P1           | 10                   | 44             | 49.8                  | 205    | 22965 | 6.5  | Carbonyl reductase [NADPH] 1                                                                                                 |
| 1613                     | D3YYE1           | 10                   | 35             | 49                    | 198    | 22954 | 4.4  | Isochorismatase domain-containing protein 1                                                                                  |
| 1613                     | D3Z7M9           | 10                   | 35             | 41.6                  | 233    | 26861 | 4    | Proteasome subunit beta type-3                                                                                               |
| 1613                     | Q35381           | 10                   | 35             | 39.3                  | 247    | 28538 | 4.1  | Uncharacterized protein                                                                                                      |
| 1614                     | Q9CYR7           | 10                   | 20             | 47.9                  | 303    | 33728 | 6.4  | Uncharacterized protein                                                                                                      |
| 1615                     | Q35887           | 10                   | 18             | 47.3                  | 315    | 37064 | 4.7  | Acidic leucine-rich nuclear phosphoprotein 32 family member A                                                                |
| 1615                     | Q3UG11           | 10                   | 18             | 47.3                  | 315    | 37065 | 4.6  | Putative uncharacterized protein                                                                                             |
| 1616                     | Q5NCU4           | 10                   | 28             | 46.8                  | 301    | 34322 | 4.9  | Secreted acidic cysteine rich glycoprotein                                                                                   |
| 1616                     | P07214           | 10                   | 28             | 46.7                  | 302    | 34450 | 4.9  | SPARC                                                                                                                        |
| 1617                     | Q9CRA5           | 10                   | 35             | 46.3                  | 298    | 33752 | 6.4  | Golgi phosphoprotein 3                                                                                                       |
| 1618                     | P23506           | 10                   | 37             | 57.3                  | 227    | 24634 | 7.6  | Protein-L-isoaspartate(D-aspartate) O-methyltransferase                                                                      |
| 1618                     | E0CYV0           | 10                   | 37             | 45.5                  | 286    | 30441 | 7.2  | Protein-L-isoaspartate O-methyltransferase                                                                                   |
| 1619                     | Q9CWS0           | 10                   | 19             | 44.9                  | 285    | 31381 | 6    | N(G),N(G)-dimethylarginine dimethylaminohydrolase 1                                                                          |
| 1620                     | Q9QXC1           | 10                   | 20             | 43.6                  | 388    | 42713 | 6.6  | Fetuin-B                                                                                                                     |
| 1620                     | Q8CB17           | 10                   | 20             | 43.6                  | 388    | 42743 | 6.6  | Putative uncharacterized protein                                                                                             |
| 1620                     | Q6YJU2           | 10                   | 20             | 41.9                  | 403    | 44372 | 6.8  | GUGU alpha                                                                                                                   |
| 1621                     | P68181-2         | 10                   | 14             | 43.2                  | 338    | 39449 | 8.6  | Isoform 2 of cAMP-dependent protein kinase catalytic subunit beta                                                            |
| 1621                     | P68181-3         | 10                   | 14             | 43.1                  | 339    | 39520 | 8.6  | Isoform 3 of cAMP-dependent protein kinase catalytic subunit beta                                                            |
| 1621                     | P68181           | 10                   | 14             | 41.6                  | 351    | 40708 | 8.6  | cAMP-dependent protein kinase catalytic subunit beta                                                                         |
| 1621                     | P68181-4         | 10                   | 14             | 36.7                  | 398    | 46014 | 8.6  | Isoform 4 of cAMP-dependent protein kinase catalytic subunit beta                                                            |
| 1622                     | Q91YR1           | 10                   | 67             | 41.4                  | 350    | 40079 | 6.7  | Twinfilin-1                                                                                                                  |
| 1623                     | Q9Z2M7           | 10                   | 20             | 41.3                  | 242    | 27657 | 6.4  | Phosphomannomutase 2                                                                                                         |
| 1624                     | Q3TL79           | 10                   | 41             | 41.1                  | 338    | 38145 | 5.5  | Putative uncharacterized protein                                                                                             |
| 1624                     | Q8BK64           | 10                   | 41             | 41.1                  | 338    | 38117 | 5.5  | Activator of 90 kDa heat shock protein ATPase homolog 1                                                                      |
| 1625                     | Q9DB79           | 10                   | 52             | 40.4                  | 166    | 19415 | 10.1 | Putative uncharacterized protein                                                                                             |
| 1626                     | P01898           | 10                   | 20             | 38.8                  | 325    | 37251 | 5.2  | H-2 class I histocompatibility antigen, Q10 alpha chain                                                                      |
| 1627                     | Q8C0E2           | 10                   | 16             | 37.8                  | 336    | 39125 | 7.4  | Vacuolar protein sorting-associated protein 26B                                                                              |
| 1628                     | P28653           | 10                   | 34             | 37.1                  | 369    | 41639 | 7.3  | Biglycan                                                                                                                     |
| 1629                     | P51885           | 10                   | 95             | 36.1                  | 338    | 38265 | 6.4  | Lumican                                                                                                                      |
| 1630                     | Q8R5C5           | 10                   | 27             | 35.9                  | 376    | 42281 | 6.4  | Beta-centractin                                                                                                              |
| 1631                     | Q3U7I9           | 10                   | 63             | 35.6                  | 404    | 44314 | 7.6  | Putative uncharacterized protein                                                                                             |
| 1631                     | P18242           | 10                   | 63             | 35.1                  | 410    | 44954 | 7.1  | Cathepsin D                                                                                                                  |
| 1631                     | Q3U7P0           | 10                   | 63             | 35.1                  | 410    | 44964 | 7.1  | Putative uncharacterized protein                                                                                             |



Table S1. Proteins identified in the OVCAR-3 tumor supernatant by two or more unique peptides.

| Protein or Protein Group | Accession Number | Unique Peptide Count | Spectrum Count | Sequence Coverage (%) | Length | MolWt  | pI  | Descriptive Name                                                       |
|--------------------------|------------------|----------------------|----------------|-----------------------|--------|--------|-----|------------------------------------------------------------------------|
| 1631                     | Q3U651           | 10                   | 63             | 35.1                  | 410    | 45000  | 7.2 | Putative uncharacterized protein                                       |
| 1631                     | Q3TXL5           | 10                   | 63             | 35.1                  | 410    | 44927  | 7.1 | Putative uncharacterized protein                                       |
| 1631                     | Q3TWR6           | 10                   | 63             | 35.1                  | 410    | 44972  | 7.1 | Putative uncharacterized protein                                       |
| 1631                     | Q3TWD0           | 10                   | 63             | 35.1                  | 410    | 44928  | 7.2 | Putative uncharacterized protein                                       |
| 1631                     | Q8C243           | 10                   | 63             | 32.4                  | 445    | 48374  | 7.3 | Putative uncharacterized protein                                       |
| 1632                     | P97807-2         | 10                   | 21             | 38.1                  | 467    | 50067  | 7.9 | Isoform Cytoplasmic of Fumarate hydratase, mitochondrial               |
| 1632                     | P97807           | 10                   | 21             | 35.1                  | 507    | 54371  | 9   | Fumarate hydratase, mitochondrial                                      |
| 1632                     | Q3UIA9           | 10                   | 21             | 35.1                  | 507    | 54357  | 9   | Fumarate hydratase 1                                                   |
| 1633                     | P07310           | 10                   | 19             | 34.6                  | 381    | 43045  | 7.1 | Creatine kinase M-type                                                 |
| 1633                     | Q9D6U7           | 10                   | 19             | 34.6                  | 381    | 43031  | 7.1 | Putative uncharacterized protein                                       |
| 1634                     | Q8CB58           | 10                   | 140            | 35.8                  | 489    | 52631  | 9   | MCG13402, isoform CRA_d                                                |
| 1634                     | Q8BGJ5           | 10                   | 140            | 33.1                  | 529    | 56892  | 9.2 | MCG13402, isoform CRA_a                                                |
| 1634                     | Q3T984           | 10                   | 140            | 33                    | 530    | 56963  | 9.2 | Putative uncharacterized protein                                       |
| 1634                     | Q80T07           | 10                   | 140            | 31.6                  | 554    | 59179  | 9.2 | Polyrimidine tract binding protein                                     |
| 1634                     | Q922I7           | 10                   | 140            | 31.5                  | 555    | 59322  | 9.2 | MCG13402, isoform CRA_c                                                |
| 1634                     | Q5RJV5           | 10                   | 140            | 31.5                  | 555    | 59264  | 9.2 | Polyrimidine tract binding protein 1                                   |
| 1634                     | Q3U5I2           | 10                   | 140            | 31.5                  | 555    | 59276  | 9.2 | Putative uncharacterized protein                                       |
| 1635                     | Q99KJ8           | 10                   | 23             | 32.8                  | 402    | 44117  | 5.3 | Dynactin subunit 2                                                     |
| 1635                     | UPI0001DAD7E3    | 10                   | 23             | 32.7                  | 404    | 44359  | 5.2 | dynactin subunit 2 isoform 2                                           |
| 1635                     | UPI0001DAD7E5    | 10                   | 23             | 32.4                  | 407    | 44706  | 5.2 | dynactin subunit 2 isoform 1                                           |
| 1636                     | Q91WP6           | 10                   | 17             | 32.5                  | 418    | 46718  | 5.8 | Serine protease inhibitor A3N                                          |
| 1637                     | Q08663           | 10                   | 14             | 30.1                  | 478    | 52922  | 5.8 | Methionine aminopeptidase 2                                            |
| 1637                     | Q3UI33           | 10                   | 14             | 29.5                  | 488    | 54117  | 5.8 | Methionine aminopeptidase                                              |
| 1638                     | Q08553           | 10                   | 20             | 25.9                  | 572    | 62278  | 6.4 | Dihydropyrimidinase-related protein 2                                  |
| 1639                     | P70389           | 10                   | 23             | 25                    | 603    | 66960  | 6.6 | Insulin-like growth factor-binding protein complex acid labile subunit |
| 1639                     | Q570Z9           | 10                   | 23             | 24.4                  | 619    | 68499  | 6.6 | MKIAA4111 protein (Fragment)                                           |
| 1639                     | UPI0001F78FD4    | 10                   | 23             | 22                    | 687    | 76370  | 6.3 | UPI0001F78FD4 UniRef100 entry                                          |
| 1639                     | Q9JIL0           | 10                   | 23             | 22                    | 687    | 76340  | 6.3 | Als splice variant 2 (Fragment)                                        |
| 1640                     | P17563           | 10                   | 20             | 24.8                  | 472    | 52514  | 6.3 | Selenium-binding protein 1                                             |
| 1641                     | Q3THP1           | 10                   | 48             | 23.6                  | 738    | 82883  | 5.3 | Putative uncharacterized protein                                       |
| 1641                     | Q8C0I6           | 10                   | 48             | 23.6                  | 738    | 82898  | 5.4 | Putative uncharacterized protein                                       |
| 1641                     | Q8BU29           | 10                   | 48             | 23.6                  | 738    | 82883  | 5.3 | Dipeptidylpeptidase 3, isoform CRA_c                                   |
| 1641                     | Q6NXZ0           | 10                   | 48             | 23.6                  | 738    | 82955  | 5.4 | Dipeptidylpeptidase 3                                                  |
| 1641                     | Q3UDF3           | 10                   | 48             | 23.6                  | 738    | 82884  | 5.3 | Putative uncharacterized protein                                       |
| 1641                     | Q3UDD5           | 10                   | 48             | 23.6                  | 738    | 82958  | 5.4 | Putative uncharacterized protein                                       |
| 1642                     | Q3TDD8           | 10                   | 48             | 21.8                  | 609    | 68710  | 6.4 | Putative uncharacterized protein                                       |
| 1642                     | Q8BGD9           | 10                   | 48             | 21.8                  | 611    | 68840  | 5.7 | Eukaryotic translation initiation factor 4B                            |
| 1642                     | Q3UGC0           | 10                   | 48             | 21.8                  | 611    | 68810  | 5.7 | Putative uncharacterized protein                                       |
| 1642                     | Q3TSY9           | 10                   | 48             | 21.8                  | 611    | 68840  | 5.7 | Putative uncharacterized protein                                       |
| 1642                     | Q3TLQ9           | 10                   | 48             | 21.8                  | 611    | 68818  | 5.7 | Putative uncharacterized protein                                       |
| 1643                     | Q08529           | 10                   | 22             | 18.1                  | 700    | 79872  | 5   | Calpain-2 catalytic subunit                                            |
| 1643                     | Q3U3A8           | 10                   | 22             | 18.1                  | 700    | 79800  | 5   | Putative uncharacterized protein                                       |
| 1644                     | Q8BVG4           | 10                   | 12             | 16                    | 862    | 98001  | 6.6 | Dipeptidyl peptidase 9                                                 |
| 1645                     | Q88207           | 10                   | 14             | 9.6                   | 1838   | 183676 | 5   | Collagen alpha-1(V) chain                                              |
| 1646                     | E9Q043           | 10                   | 17             | 9.2                   | 1732   | 189090 | 9.4 | Uncharacterized protein                                                |
| 1647                     | D320Q0           | 10                   | 16             | 8.4                   | 1184   | 132304 | 8.2 | pyrophosphohydrolase, isoform CRA_a                                    |
| 1647                     | Q66K08           | 10                   | 16             | 8.4                   | 1184   | 132334 | 8.2 | Cartilage intermediate layer protein 1                                 |
| 1648                     | Q9ET54-3         | 10                   | 21             | 15.7                  | 663    | 72368  | 7.7 | Isoform 3 of Palladin                                                  |
| 1648                     | Q9ET54-5         | 10                   | 21             | 15.5                  | 670    | 72985  | 7.5 | Isoform 5 of Palladin                                                  |
| 1648                     | Q9ET54-4         | 10                   | 21             | 10.4                  | 1002   | 108287 | 6.8 | Isoform 4 of Palladin                                                  |
| 1648                     | Q9ET54-6         | 10                   | 21             | 7.5                   | 1391   | 150553 | 6.2 | Isoform 6 of Palladin                                                  |
| 1648                     | Q9ET54           | 10                   | 21             | 7.4                   | 1408   | 152131 | 6.2 | Palladin                                                               |
| 1649                     | UPI0001E6B8CE    | 10                   | 90             | 4.3                   | 3558   | 368792 | 6.4 | PREDICTED: protein AHNAK2-like                                         |
| 1650                     | P31946-2         | 10                   | 113            | 83.6                  | 244    | 27850  | 4.8 | Isoform Short of 14-3-3 protein beta/alpha                             |
| 1650                     | P31946           | 10                   | 113            | 82.9                  | 246    | 28082  | 4.8 | 14-3-3 protein beta/alpha                                              |
| 1651                     | Q9Y3C4           | 10                   | 33             | 80.6                  | 175    | 19661  | 6.8 | TP53RK-binding protein                                                 |
| 1652                     | Q75368           | 10                   | 40             | 78.9                  | 114    | 12774  | 5.2 | SH3 domain-binding glutamic acid-rich-like protein                     |
| 1653                     | Q15185           | 10                   | 103            | 78.8                  | 160    | 18697  | 4.5 | Prostaglandin E synthase 3                                             |
| 1654                     | P18085           | 10                   | 263            | 76.1                  | 180    | 20511  | 7.2 | ADP-ribosylation factor 4                                              |
| 1655                     | Q75223           | 10                   | 49             | 74.5                  | 188    | 21008  | 5.1 | Gamma-glutamylcyclotransferase                                         |
| 1656                     | Q9P000           | 10                   | 25             | 74.2                  | 198    | 21819  | 5.9 | COMM domain-containing protein 9                                       |
| 1657                     | Q14019           | 10                   | 88             | 70.4                  | 142    | 15945  | 5.7 | Coactosin-like protein                                                 |
| 1658                     | P07737           | 10                   | 437            | 70                    | 140    | 15054  | 8.3 | Profilin-1                                                             |
| 1659                     | P68402           | 10                   | 46             | 69.4                  | 229    | 25569  | 5.9 | Platelet-activating factor acetylhydrolase IB subunit beta             |
| 1660                     | P19387           | 10                   | 18             | 67.3                  | 275    | 31441  | 4.9 | DNA-directed RNA polymerase II subunit RPB3                            |
| 1661                     | Q86X83           | 10                   | 28             | 67.3                  | 199    | 22745  | 6.7 | COMM domain-containing protein 2                                       |
| 1662                     | Q9Y530           | 10                   | 22             | 67.1                  | 152    | 17025  | 8.3 | Uncharacterized protein C6orf130                                       |
| 1663                     | P32321           | 10                   | 54             | 66.9                  | 178    | 20016  | 7.6 | Deoxycytidylate deaminase                                              |
| 1663                     | P32321-2         | 10                   | 54             | 63                    | 189    | 21014  | 7.5 | Isoform 2 of Deoxycytidylate deaminase                                 |
| 1664                     | Q9Y3C8           | 10                   | 24             | 66.5                  | 167    | 19458  | 7.4 | Ubiquitin-fold modifier-conjugating enzyme 1                           |
| 1665                     | Q01469           | 10                   | 123            | 65.2                  | 135    | 15164  | 7   | Fatty acid-binding protein, epidermal                                  |
| 1666                     | A6NIH7           | 10                   | 18             | 64.9                  | 251    | 28137  | 5.7 | Protein unc-119 log B                                                  |
| 1667                     | P78330           | 10                   | 20             | 64.9                  | 225    | 25008  | 5.7 | Phosphoserine phosphatase                                              |
| 1668                     | P36405           | 10                   | 30             | 64.8                  | 182    | 20456  | 7.2 | ADP-ribosylation factor-like protein 3                                 |
| 1669                     | UPI000198CDA3    | 10                   | 39             | 67                    | 191    | 21714  | 6.5 | UPI000198CDA3 UniRef100 entry                                          |
| 1669                     | Q9UES0           | 10                   | 39             | 67                    | 191    | 21607  | 6.5 | SNARE protein Ykt6 (Fragment)                                          |
| 1669                     | Q15498           | 10                   | 39             | 64.6                  | 198    | 22418  | 6.9 | Synaptobrevin log YKT6                                                 |
| 1670                     | P02794           | 10                   | 94             | 63.4                  | 183    | 21226  | 5.6 | Ferritin heavy chain                                                   |
| 1670                     | Q6NS36           | 10                   | 94             | 50                    | 232    | 26219  | 6.5 | Ferritin (Fragment)                                                    |
| 1671                     | Q16527           | 10                   | 77             | 62.7                  | 193    | 20954  | 8.6 | Cysteine and glycine-rich protein 2                                    |
| 1672                     | P15927           | 10                   | 36             | 61.1                  | 270    | 29247  | 6.1 | Replication protein A 32 kDa subunit                                   |
| 1672                     | P15927-2         | 10                   | 36             | 59.4                  | 278    | 30156  | 7   | Isoform 2 of Replication protein A 32 kDa subunit                      |
| 1672                     | P15927-3         | 10                   | 36             | 46.1                  | 358    | 38810  | 8.9 | Isoform 3 of Replication protein A 32 kDa subunit                      |
| 1673                     | Q9H2J4           | 10                   | 17             | 61.1                  | 239    | 27614  | 4.8 | Phosducin-like protein 3                                               |
| 1674                     | Q9GZP4           | 10                   | 25             | 59.7                  | 211    | 24178  | 5.8 | PITH domain-containing protein 1                                       |
| 1675                     | Q15274           | 10                   | 28             | 59.6                  | 297    | 30846  | 6.2 | Nicotinate-nucleotide pyrophosphorylase [carboxylating]                |
| 1676                     | P57735           | 10                   | 28             | 59.2                  | 213    | 23496  | 6   | Ras-related protein Rab-25                                             |
| 1677                     | P07203           | 10                   | 31             | 59.1                  | 203    | 21938  | 6.5 | Glutathione peroxidase 1                                               |
| 1678                     | B3KPC7           | 10                   | 42             | 58.8                  | 153    | 16971  | 6   | Actin-related protein 2/3 complex subunit 5                            |
| 1678                     | Q9BPX5           | 10                   | 42             | 58.8                  | 153    | 16941  | 6.6 | Actin-related protein 2/3 complex subunit 5-like protein               |
| 1679                     | Q9Y508           | 10                   | 41             | 58.8                  | 228    | 25694  | 7.3 | RING finger protein 114                                                |
| 1680                     | Q9UH77           | 10                   | 34             | 58.2                  | 261    | 28933  | 4.8 | Enolase-phosphatase E1                                                 |
| 1681                     | Q13907           | 10                   | 24             | 57.7                  | 227    | 26319  | 6.4 | Isopentenyl-diphosphate Delta-isomerase 1                              |
| 1682                     | Q13162           | 10                   | 32             | 57.2                  | 271    | 30540  | 6.3 | Peroxiredoxin-4                                                        |
| 1683                     | Q75663           | 10                   | 30             | 56.6                  | 272    | 31444  | 5.9 | TIP41-like protein                                                     |
| 1684                     | P30044-2         | 10                   | 193            | 74.1                  | 162    | 17031  | 7.2 | Isoform Cytoplasmic+peroxisomal of Peroxiredoxin-5, mitochondrial      |
| 1684                     | P30044           | 10                   | 193            | 56.1                  | 214    | 22086  | 8.7 | Peroxiredoxin-5, mitochondrial                                         |
| 1685                     | B4E1H6           | 10                   | 24             | 55.5                  | 218    | 23782  | 7.5 | Guanylate kinase 1, isoform CRA_e                                      |
| 1686                     | Q13938           | 10                   | 25             | 52.9                  | 189    | 20967  | 4.9 | Calycophosin                                                           |
| 1686                     | Q8NF12           | 10                   | 25             | 31.1                  | 322    | 35036  | 6.7 | FLJ00390 protein (Fragment)                                            |

Table S1. Proteins identified in the OVCAR-3 tumor supernatant by two or more unique peptides.

| Protein or Protein Group | Accession Number | Unique Peptide Count | Spectrum Count | Sequence Coverage (%) | Length | MolWt | pI   | Descriptive Name                                                                                                                                      |
|--------------------------|------------------|----------------------|----------------|-----------------------|--------|-------|------|-------------------------------------------------------------------------------------------------------------------------------------------------------|
| 1687                     | B2R7M3           | 10                   | 38             | 52.8                  | 320    | 35448 | 8.4  | cDNA, FLJ93510, highly similar to sapiens JTV1 gene (JTV1), mRNA                                                                                      |
| 1687                     | Q13155           | 10                   | 38             | 52.8                  | 320    | 35349 | 8.2  | Aminoacyl tRNA synthase complex-interacting multifunctional protein 2                                                                                 |
| 1688                     | Q53H96           | 10                   | 17             | 52.2                  | 274    | 28649 | 7.5  | Pyrrrole-5-carboxylate reductase 3                                                                                                                    |
| 1689                     | B4DT01           | 10                   | 38             | 51.5                  | 305    | 33435 | 8.1  | cDNA FLJ60347, highly similar to sapiens hydroxyacylglutathione hydrolase (HAGH), transcript variant 1, mRNA                                          |
| 1689                     | Q16775           | 10                   | 38             | 51                    | 308    | 33806 | 8.1  | Hydroxyacylglutathione hydrolase, mitochondrial                                                                                                       |
| 1690                     | A8K4Z4           | 10                   | 72             | 51.4                  | 317    | 34239 | 6    | cDNA FLJ75549, highly similar to sapiens ribosomal protein, large, P0 (RPLP0), transcript variant 1, mRNA                                             |
| 1690                     | Q53HW2           | 10                   | 72             | 51.4                  | 317    | 34302 | 6    | Ribosomal protein P0 variant (Fragment)                                                                                                               |
| 1690                     | P05388           | 10                   | 72             | 51.4                  | 317    | 34274 | 6    | 60S acidic ribosomal protein P0                                                                                                                       |
| 1691                     | B4DTR0           | 10                   | 31             | 51.2                  | 260    | 29653 | 6.5  | cDNA FLJ54885, weakly similar to Mus musculus potassium channel tetramerisation domain containing 11 (Kctd11), mRNA                                   |
| 1691                     | Q4G0X4           | 10                   | 31             | 51.2                  | 260    | 29643 | 6.5  | BTB/POZ domain-containing protein KCTD21                                                                                                              |
| 1692                     | Q9UN19           | 10                   | 17             | 51.1                  | 280    | 32194 | 7.8  | Dual adapter for phosphotyrosine and 3-phosphotyrosine and 3-phosphoinositide                                                                         |
| 1693                     | P39019           | 10                   | 79             | 51                    | 145    | 16060 | 10.3 | 40S ribosomal protein S19                                                                                                                             |
| 1693                     | Q8VWX7           | 10                   | 79             | 47.1                  | 157    | 17282 | 10.5 | Ribosomal protein S19 (Fragment)                                                                                                                      |
| 1694                     | Q15347           | 10                   | 31             | 50                    | 200    | 22980 | 8.4  | High mobility group protein B3                                                                                                                        |
| 1695                     | P49720           | 10                   | 66             | 49.8                  | 205    | 22949 | 6.5  | Proteasome subunit beta type-3                                                                                                                        |
| 1696                     | UPI000045684C    | 10                   | 71             | 50                    | 250    | 26552 | 9.6  | Deoxyuridine 5'-triphosphate nucleotidohydrolase, mitochondrial precursor (EC 3.6.1.23) (dUTPase) (dUTP pyrophosphatase).                             |
| 1696                     | P33316           | 10                   | 71             | 49.6                  | 252    | 26706 | 9.6  | Deoxyuridine 5'-triphosphate nucleotidohydrolase, mitochondrial isoform 3 of Deoxyuridine 5'-triphosphate nucleotidohydrolase, mitochondrial          |
| 1696                     | P33316-3         | 10                   | 71             | 49.6                  | 252    | 26563 | 9.4  | mitochondrial                                                                                                                                         |
| 1697                     | Q9UKL6           | 10                   | 30             | 49.5                  | 214    | 24843 | 5.8  | Phosphatidylcholine transfer protein                                                                                                                  |
| 1698                     | P26583           | 10                   | 41             | 49.3                  | 209    | 24034 | 7.8  | High mobility group protein B2                                                                                                                        |
| 1699                     | Q9BVG4           | 10                   | 28             | 48.9                  | 233    | 26057 | 4.8  | UPF0368 protein Cxorf26                                                                                                                               |
| 1700                     | Q9H0Q0           | 10                   | 14             | 48                    | 323    | 37313 | 6    | Protein FAM49A                                                                                                                                        |
| 1701                     | B4DQU7           | 10                   | 52             | 47.5                  | 278    | 31614 | 7.6  | cDNA FLJ55032, highly similar to Caspase-7 (EC 3.4.22.-)                                                                                              |
| 1701                     | P55210           | 10                   | 52             | 43.6                  | 303    | 34277 | 6.1  | Caspase-7                                                                                                                                             |
| 1701                     | P55210-3         | 10                   | 52             | 39.3                  | 336    | 37815 | 6.4  | Isoform Alpha' of Caspase-7                                                                                                                           |
| 1702                     | Q96GA7           | 10                   | 21             | 47.1                  | 329    | 34674 | 6.9  | Serine dehydratase-like                                                                                                                               |
| 1703                     | Q8IW45           | 10                   | 11             | 47                    | 347    | 36576 | 8.1  | Carbohydrate kinase domain-containing protein                                                                                                         |
| 1704                     | P23284           | 10                   | 57             | 46.8                  | 216    | 23743 | 9.4  | Peptidyl-prolyl cis-trans isomerase B                                                                                                                 |
| 1705                     | Q96HY6           | 10                   | 45             | 46.5                  | 314    | 35611 | 5.1  | DDRKG domain-containing protein 1                                                                                                                     |
| 1706                     | Q96C86           | 10                   | 20             | 46.3                  | 337    | 38609 | 6.4  | Scavenger mRNA-decapping enzyme Dcp5                                                                                                                  |
| 1707                     | P46736-2         | 10                   | 19             | 50.2                  | 291    | 33150 | 6    | Isoform 1 of Lys-63-specific deubiquitinase BRCC36                                                                                                    |
| 1707                     | P46736-3         | 10                   | 19             | 50                    | 292    | 33237 | 6    | Isoform 3 of Lys-63-specific deubiquitinase BRCC36                                                                                                    |
| 1707                     | P46736           | 10                   | 19             | 46.2                  | 316    | 36072 | 5.9  | Lys-63-specific deubiquitinase BRCC36                                                                                                                 |
| 1708                     | E7EQL0           | 10                   | 15             | 45.8                  | 286    | 31417 | 8.6  | Uncharacterized protein                                                                                                                               |
| 1708                     | Q9NZ30           | 10                   | 15             | 45.8                  | 286    | 31303 | 8.9  | Uncharacterized hypothalamus protein HCDASE                                                                                                           |
| 1708                     | Q9NTX5           | 10                   | 15             | 42.7                  | 307    | 33698 | 8.2  | Enoyl-CoA hydratase domain-containing protein 1                                                                                                       |
| 1709                     | P40121           | 10                   | 36             | 45.7                  | 348    | 38499 | 6.2  | Macrophage-capping protein                                                                                                                            |
| 1710                     | Q969E4           | 10                   | 30             | 45.5                  | 200    | 22502 | 4.9  | Transcription elongation factor A protein-like 3                                                                                                      |
| 1711                     | P36969-2         | 10                   | 50             | 51.8                  | 170    | 19375 | 7.9  | Isoform Cytoplasmic of Phospholipid hydroperoxide glutathione peroxidase, mitochondrial                                                               |
| 1711                     | P36969           | 10                   | 50             | 44.7                  | 197    | 22025 | 8.4  | Phospholipid hydroperoxide glutathione peroxidase, mitochondrial phospholipid hydroperoxide glutathione peroxidase, mitochondrial isoform C precursor |
| 1711                     | UPI000096F213    | 10                   | 50             | 37.6                  | 234    | 26948 | 10.1 | Uncharacterized protein                                                                                                                               |
| 1712                     | A8MV37           | 10                   | 21             | 44.2                  | 308    | 34012 | 5.7  | Protein SEC13 loq                                                                                                                                     |
| 1712                     | P55735           | 10                   | 21             | 42.2                  | 322    | 35541 | 5.5  | DnaJ loq subfamily A member 1                                                                                                                         |
| 1713                     | P31689           | 10                   | 29             | 44.1                  | 397    | 44868 | 7.1  | PREDICTED: actin-related protein 2/3 complex subunit 1B-like                                                                                          |
| 1714                     | UPI00006C0D04    | 10                   | 27             | 41.9                  | 370    | 40821 | 8.9  | Actin-related protein 2/3 complex subunit 1B                                                                                                          |
| 1714                     | Q15143           | 10                   | 27             | 41.7                  | 372    | 40950 | 8.4  | tRNA-splicing endonuclease subunit Sen34                                                                                                              |
| 1715                     | Q9BSV6           | 10                   | 13             | 41.6                  | 310    | 33652 | 8.4  | Isoform B of Peptidyl-prolyl cis-trans isomerase E                                                                                                    |
| 1716                     | Q9UNP9-2         | 10                   | 26             | 43.6                  | 296    | 33085 | 5.6  | Peptidyl-prolyl cis-trans isomerase E                                                                                                                 |
| 1716                     | Q9UNP9           | 10                   | 26             | 42.9                  | 301    | 33431 | 5.6  | Cyclophilin-33B                                                                                                                                       |
| 1716                     | Q3S611           | 10                   | 26             | 41.1                  | 314    | 35020 | 6.2  | Peptidylprolyl isomerase E (Cyclophilin E)                                                                                                            |
| 1716                     | Q5TGA3           | 10                   | 26             | 41.1                  | 314    | 34991 | 6.4  | 26S proteasome non-ATPase regulatory subunit 8                                                                                                        |
| 1717                     | P48556           | 10                   | 26             | 40.6                  | 350    | 39612 | 9.7  | BRO1 domain-containing protein BROX                                                                                                                   |
| 1718                     | Q5VW32           | 10                   | 22             | 39.4                  | 411    | 46476 | 7.6  | Tetrapeptide repeat domain 1 variant (Fragment)                                                                                                       |
| 1719                     | Q53GE7           | 10                   | 18             | 39                    | 292    | 33595 | 4.9  | Tetrapeptide repeat domain 1                                                                                                                          |
| 1719                     | Q99614           | 10                   | 18             | 39                    | 292    | 33526 | 4.8  | Tetrapeptide repeat domain 1 variant (Fragment)                                                                                                       |
| 1719                     | Q53HD9           | 10                   | 18             | 39                    | 292    | 33454 | 4.9  | UPF0609 protein C4orf27                                                                                                                               |
| 1720                     | Q9NWWY4          | 10                   | 16             | 38.4                  | 346    | 39436 | 6.8  | Isoform 2 of Regulation of nuclear pre-mRNA domain-containing protein 1A                                                                              |
| 1721                     | Q96P16-2         | 10                   | 33             | 40.8                  | 289    | 32917 | 6.7  | Regulation of nuclear pre-mRNA domain-containing protein 1A                                                                                           |
| 1721                     | Q96P16           | 10                   | 33             | 37.8                  | 312    | 35720 | 7.5  | Protein TSSC1                                                                                                                                         |
| 1722                     | Q53HC9           | 10                   | 14             | 39.5                  | 387    | 43603 | 5.1  | Uncharacterized protein                                                                                                                               |
| 1722                     | A8MUM1           | 10                   | 14             | 37                    | 414    | 46320 | 5.1  | WDR45-like, isoform CRA_f                                                                                                                             |
| 1723                     | B4DMI6           | 10                   | 32             | 36.7                  | 316    | 35175 | 7.8  | WD repeat domain phosphoinositide-interacting protein 3                                                                                               |
| 1723                     | Q5MZN6           | 10                   | 32             | 33.7                  | 344    | 38122 | 7.6  | Sequestosome-1                                                                                                                                        |
| 1724                     | Q13501           | 10                   | 28             | 35.9                  | 440    | 47687 | 5.2  | Arfaptin-2                                                                                                                                            |
| 1725                     | P53365           | 10                   | 38             | 35.8                  | 341    | 37856 | 6    | cDNA FLJ53687, highly similar to Hsc70-interacting protein                                                                                            |
| 1726                     | B4E0U6           | 10                   | 38             | 35.4                  | 359    | 40161 | 5.3  | Hsc70-interacting protein                                                                                                                             |
| 1726                     | P50502           | 10                   | 38             | 34.4                  | 369    | 41332 | 5.3  | Cytoplasmic dynein 1 light intermediate chain 2                                                                                                       |
| 1727                     | Q43237           | 10                   | 24             | 34.8                  | 492    | 54099 | 6.4  | 2',3'-cyclic-nucleotide 3'-phosphodiesterase                                                                                                          |
| 1728                     | P09543           | 10                   | 15             | 34.4                  | 421    | 47579 | 9.1  | Guanine nucleotide-binding protein G(q) subunit alpha                                                                                                 |
| 1729                     | P50148           | 10                   | 13             | 34.3                  | 359    | 42142 | 5.7  | Isoform 1 of Cytosolic 5'-nucleotidase 3                                                                                                              |
| 1730                     | Q9H0P0-1         | 10                   | 15             | 38.4                  | 297    | 33915 | 5.9  | Cytosolic 5'-nucleotidase 3                                                                                                                           |
| 1730                     | Q9H0P0           | 10                   | 15             | 33.9                  | 336    | 37948 | 7.1  | cDNA, FLJ94391, highly similar to sapiens serine (or cysteine) proteinase inhibitor, clade B (ovalbumin), member 8 (SERPINB8), mRNA                   |
| 1731                     | B2R9H3           | 10                   | 12             | 32.4                  | 374    | 42755 | 5.5  | programmed cell death protein 4 isoform 3                                                                                                             |
| 1732                     | UPI0001EC9622    | 10                   | 14             | 33                    | 455    | 50243 | 5.5  | cDNA FLJ58014, highly similar to sapiens programmed cell death 4, transcript variant 1, mRNA                                                          |
| 1732                     | B4DKX4           | 10                   | 14             | 33                    | 455    | 50229 | 5.5  | UPI00015E017C UniRef100 entry                                                                                                                         |
| 1732                     | UPI00015E017C    | 10                   | 14             | 32.8                  | 457    | 50394 | 5.5  | Uncharacterized protein                                                                                                                               |
| 1732                     | B5ME91           | 10                   | 14             | 32.8                  | 458    | 50576 | 5.5  | cDNA, FLJ92910, highly similar to sapiens programmed cell death 4 (neoplastic transformation inhibitor) (PDCC4), transcript variant 1, mRNA           |
| 1732                     | B2R6E2           | 10                   | 14             | 32                    | 469    | 51631 | 5.2  | Programmed cell death protein 4                                                                                                                       |
| 1732                     | Q53EL6           | 10                   | 14             | 32                    | 469    | 51735 | 5.2  | Coronin-1A                                                                                                                                            |
| 1733                     | P31146           | 10                   | 16             | 31.5                  | 461    | 51026 | 6.7  | Dipeptidyl peptidase 2                                                                                                                                |
| 1734                     | Q9UHL4           | 10                   | 24             | 31.3                  | 492    | 54341 | 6.3  | Sorting nexin 1 isoform a variant (Fragment)                                                                                                          |
| 1735                     | Q59GU6           | 10                   | 22             | 32.6                  | 432    | 50099 | 7    | Sorting nexin 1, isoform CRA_d                                                                                                                        |
| 1735                     | A6NKH4           | 10                   | 22             | 29.7                  | 474    | 53304 | 5    | Sorting nexin 1 isoform a variant (Fragment)                                                                                                          |
| 1735                     | Q53GY8           | 10                   | 22             | 27                    | 522    | 59012 | 5.2  | Sorting nexin-1                                                                                                                                       |
| 1735                     | Q13596           | 10                   | 22             | 27                    | 522    | 59070 | 5.1  |                                                                                                                                                       |

Table S1. Proteins identified in the OVCAR-3 tumor supernatant by two or more unique peptides.

| Protein or Protein Group | Accession Number | Unique Peptide Count | Spectrum Count | Sequence Coverage (%) | Length | MolWt  | pI  | Descriptive Name                                                                                                                                                       |
|--------------------------|------------------|----------------------|----------------|-----------------------|--------|--------|-----|------------------------------------------------------------------------------------------------------------------------------------------------------------------------|
| 1736                     | Q96FC7           | 10                   | 23             | 29.3                  | 376    | 42486  | 6.4 | Phytanoyl-CoA hydroxylase-interacting protein-like                                                                                                                     |
| 1737                     | Q6YP21           | 10                   | 15             | 29.1                  | 454    | 51400  | 8.2 | Kynurenine-oxoglutarate transaminase 3                                                                                                                                 |
| 1738                     | Q99733           | 10                   | 33             | 29.9                  | 375    | 42823  | 4.7 | Nucleosome assembly protein 1-like 4<br>cDNA, FLJ92975, highly similar to sapiens nucleosome assembly protein 1-like 4 (NAP1L4), mRNA                                  |
| 1738                     | B2R6J4           | 10                   | 33             | 29.9                  | 375    | 42795  | 4.7 | cDNA, FLJ79223, highly similar to Nucleosome assembly protein 1-like 4                                                                                                 |
| 1738                     | B7ZAK9           | 10                   | 33             | 29.2                  | 384    | 43836  | 4.7 | Nucleosome assembly protein 1-like 4b                                                                                                                                  |
| 1738                     | A8MZ22           | 10                   | 33             | 29                    | 386    | 44079  | 4.7 | cDNA, FLJ79447, highly similar to Nucleosome assembly protein 1-like 4                                                                                                 |
| 1738                     | B7ZB83           | 10                   | 33             | 29                    | 386    | 44080  | 4.7 | cDNA FLJ59403, highly similar to Nucleosome assembly protein 1-like 4                                                                                                  |
| 1738                     | B4DS05           | 10                   | 33             | 29                    | 386    | 44095  | 4.7 | cDNA FLJ77858, highly similar to sapiens N-acylsphingosine amidohydrolase (acid ceramidase) 1 (ASAH1), transcript variant 1, mRNA                                      |
| 1739                     | A8K0B6           | 10                   | 32             | 28.4                  | 395    | 44674  | 7.6 | N-acylsphingosine amidohydrolase (Acid ceramidase) 1 preproprotein isoform a variant (Fragment)                                                                        |
| 1739                     | Q53H01           | 10                   | 32             | 28.4                  | 395    | 44692  | 7.6 | N-acylsphingosine amidohydrolase (Acid ceramidase) 1, isoform CRA_c                                                                                                    |
| 1739                     | D3DSQ1           | 10                   | 32             | 20.5                  | 546    | 60683  | 8.8 | Uncharacterized protein                                                                                                                                                |
| 1740                     | C9JG97           | 10                   | 22             | 28.7                  | 415    | 44693  | 4.6 | Angio-associated, migratory cell protein, isoform CRA_a                                                                                                                |
| 1740                     | C9JEH3           | 10                   | 22             | 27.4                  | 435    | 46822  | 4.4 | Angio-associated migratory cell protein                                                                                                                                |
| 1740                     | Q13685           | 10                   | 22             | 27.4                  | 434    | 46751  | 4.4 | Protein DEK                                                                                                                                                            |
| 1741                     | P35659           | 10                   | 31             | 27.2                  | 375    | 42674  | 8.6 | cDNA FLJ54191, highly similar to Annexin A7                                                                                                                            |
| 1742                     | B4DWU2           | 10                   | 29             | 30.3                  | 393    | 43568  | 6.6 | cDNA FLJ55060, highly similar to Annexin A7                                                                                                                            |
| 1742                     | B4DHY4           | 10                   | 29             | 27.4                  | 434    | 47739  | 5.7 | Annexin VII isoform 1 variant (Fragment)                                                                                                                               |
| 1742                     | Q53HM8           | 10                   | 29             | 25.5                  | 466    | 50228  | 7.2 | Isoform 2 of Annexin A7                                                                                                                                                |
| 1742                     | P20073-2         | 10                   | 29             | 25.5                  | 466    | 50316  | 6.6 | cDNA, FLJ92798, highly similar to sapiens annexin A7 (ANXA7), transcript variant 2, mRNA                                                                               |
| 1742                     | B2R657           | 10                   | 29             | 24.4                  | 488    | 52640  | 5.5 | Annexin A7                                                                                                                                                             |
| 1742                     | P20073           | 10                   | 29             | 24.4                  | 488    | 52739  | 5.7 | cDNA FLJ56210, highly similar to Zinc phosphodiesterase ELAC protein 2 (EC 3.1.26.11)                                                                                  |
| 1743                     | B4E365           | 10                   | 20             | 24.2                  | 624    | 70031  | 7   | Uncharacterized protein                                                                                                                                                |
| 1743                     | E7ES68           | 10                   | 20             | 24.2                  | 624    | 70005  | 7   | Zinc phosphodiesterase ELAC protein 2 (EC 3.1.26.11) (Ribonuclease Z 2) (RNase Z 2) (tRNA 3 endonuclease 2) (ElaC log protein 2) (Heredity prostate cancer protein 2). |
| 1743                     | UPI000013F7BC    | 10                   | 20             | 18.7                  | 807    | 90037  | 8   | Uncharacterized protein                                                                                                                                                |
| 1743                     | E9PGJ0           | 10                   | 20             | 18.7                  | 809    | 90228  | 8   | zinc phosphodiesterase ELAC protein 2 isoform 2                                                                                                                        |
| 1743                     | UPI0000EE6311    | 10                   | 20             | 18.3                  | 825    | 92091  | 7.8 | Zinc phosphodiesterase ELAC protein 2                                                                                                                                  |
| 1743                     | Q9BQ52           | 10                   | 20             | 18.3                  | 826    | 92219  | 7.9 | cDNA PSEC0266 fis, clone NT2RP3003649, highly similar to sapiens fibulin-1D mRNA                                                                                       |
| 1744                     | Q8NBH6           | 10                   | 20             | 25.4                  | 638    | 70578  | 5.9 | Fibulin-1                                                                                                                                                              |
| 1744                     | P23142           | 10                   | 20             | 23                    | 703    | 77214  | 5.2 | fibulin-1 isoform D precursor                                                                                                                                          |
| 1744                     | UPI00001C1A97    | 10                   | 20             | 23                    | 703    | 77242  | 5.3 | cDNA FLJ58187, highly similar to Protein-glutamine gamma-glutamyltransferase 2(EC 2.3.2.13)                                                                            |
| 1745                     | B4DIT7           | 10                   | 15             | 22.6                  | 606    | 68649  | 5.3 | Protein-glutamine gamma-glutamyltransferase 2                                                                                                                          |
| 1745                     | P21980           | 10                   | 15             | 19.9                  | 687    | 77329  | 5.2 | Copine-3                                                                                                                                                               |
| 1746                     | O75131           | 10                   | 18             | 21.8                  | 537    | 60131  | 5.8 | Uncharacterized protein                                                                                                                                                |
| 1747                     | E2RRT1           | 10                   | 192            | 24.8                  | 548    | 59712  | 9.5 | Isoform 6 of Splicing factor 1                                                                                                                                         |
| 1747                     | Q15637-6         | 10                   | 192            | 23.8                  | 571    | 61889  | 9.3 | cDNA FLJ54737, highly similar to Splicing factor 1                                                                                                                     |
| 1747                     | B7Z1Q1           | 10                   | 192            | 22.2                  | 613    | 65387  | 8.4 | Isoform 3 of Splicing factor 1                                                                                                                                         |
| 1747                     | Q15637-3         | 10                   | 192            | 21.8                  | 623    | 67277  | 9.2 | Uncharacterized protein                                                                                                                                                |
| 1747                     | E7ESU3           | 10                   | 192            | 21.8                  | 624    | 67374  | 9.2 | cDNA FLJ53344, highly similar to Splicing factor 1                                                                                                                     |
| 1747                     | B4DJU4           | 10                   | 192            | 21.6                  | 630    | 67350  | 9.1 | Splicing factor 1 isoform 2 (Predicted)                                                                                                                                |
| 1747                     | B0KWK3           | 10                   | 192            | 21.3                  | 638    | 68633  | 9.2 | Splicing factor 1                                                                                                                                                      |
| 1747                     | Q15637           | 10                   | 192            | 21.3                  | 639    | 68330  | 9   | Isoform 5 of Splicing factor 1                                                                                                                                         |
| 1747                     | Q15637-5         | 10                   | 192            | 17.8                  | 764    | 80621  | 9.5 | SAM domain and HD domain-containing protein 1                                                                                                                          |
| 1748                     | Q9Y3Z3           | 10                   | 18             | 18.8                  | 626    | 72201  | 7.1 | Isoform 2 of Oxidation resistance protein 1                                                                                                                            |
| 1749                     | Q8N573-2         | 10                   | 18             | 17.5                  | 839    | 93734  | 5.2 | Isoform 5 of Oxidation resistance protein 1                                                                                                                            |
| 1749                     | Q8N573-5         | 10                   | 18             | 17.4                  | 846    | 94692  | 5.3 | Oxidation resistance 1                                                                                                                                                 |
| 1749                     | D3HIS6           | 10                   | 18             | 16.8                  | 873    | 97916  | 5.4 | Oxidation resistance protein 1                                                                                                                                         |
| 1749                     | Q8N573           | 10                   | 18             | 16.8                  | 874    | 97970  | 5.5 | Integrator complex subunit 3                                                                                                                                           |
| 1750                     | Q68E01           | 10                   | 24             | 16.2                  | 1043   | 118070 | 5.8 | UPI0001AE78D3 UniRef100 entry                                                                                                                                          |
| 1750                     | UPI0001AE78D3    | 10                   | 24             | 16.2                  | 1043   | 118084 | 5.8 | Isoform 2 of Integrator complex subunit 3                                                                                                                              |
| 1750                     | Q68E01-2         | 10                   | 24             | 16.2                  | 1042   | 118013 | 5.8 | cDNA FLJ75881, highly similar to sapiens transferrin receptor (p90, CD71) (TFRC), mRNA                                                                                 |
| 1751                     | A8K6Q8           | 10                   | 17             | 15.7                  | 760    | 84873  | 6.6 | Transferrin receptor protein 1                                                                                                                                         |
| 1751                     | P02786           | 10                   | 17             | 15.7                  | 760    | 84871  | 6.6 | Lethal(2) giant larvae protein log 1                                                                                                                                   |
| 1752                     | Q15334           | 10                   | 12             | 15.3                  | 1064   | 115418 | 6.3 | Isoform A of Lethal(2) giant larvae protein log 2                                                                                                                      |
| 1753                     | Q6P1M3-2         | 10                   | 13             | 15.2                  | 1015   | 112927 | 7.3 | Lethal(2) giant larvae protein log 2                                                                                                                                   |
| 1753                     | Q6P1M3           | 10                   | 13             | 15.1                  | 1020   | 113448 | 7.5 | Isoform 4 of Ubiquitin-associated protein 2-like                                                                                                                       |
| 1754                     | Q14157-4         | 10                   | 84             | 16.6                  | 976    | 103168 | 6.9 | Isoform 2 of Ubiquitin-associated protein 2-like                                                                                                                       |
| 1754                     | Q14157-1         | 10                   | 84             | 16.5                  | 983    | 103930 | 7   | Isoform 3 of Ubiquitin-associated protein 2-like                                                                                                                       |
| 1754                     | Q14157-3         | 10                   | 84             | 15.2                  | 1068   | 112580 | 6.6 | cDNA FLJ55671, highly similar to Ubiquitin-associated protein 2-like                                                                                                   |
| 1754                     | B4DY55           | 10                   | 84             | 15                    | 1078   | 113560 | 6.7 | Ubiquitin-associated protein 2-like                                                                                                                                    |
| 1754                     | Q14157           | 10                   | 84             | 14.9                  | 1087   | 114534 | 7.1 | Isoform 3 of Guanine nucleotide exchange factor VAV2                                                                                                                   |
| 1755                     | P52735-3         | 10                   | 31             | 14.9                  | 839    | 97032  | 6.9 | Protein vav-2.                                                                                                                                                         |
| 1755                     | UPI000179A876    | 10                   | 31             | 14.9                  | 839    | 97120  | 7.1 | MAN2C1 protein                                                                                                                                                         |
| 1756                     | Q68EM8           | 10                   | 12             | 14.7                  | 1017   | 113407 | 6.6 | Alpha-mannosidase 2C1                                                                                                                                                  |
| 1756                     | Q9NTJ4           | 10                   | 12             | 14.3                  | 1040   | 115835 | 6.6 | Thrombospondin-2                                                                                                                                                       |
| 1757                     | P35442           | 10                   | 22             | 12.7                  | 1172   | 129991 | 4.8 | TBC1 domain family, member 9B (With GRAM domain)                                                                                                                       |
| 1758                     | A1L3A9           | 10                   | 15             | 11.6                  | 1232   | 138540 | 5.3 | Isoform 2 of TBC1 domain family member 9B                                                                                                                              |
| 1758                     | Q66K14-2         | 10                   | 15             | 11.6                  | 1233   | 138670 | 5.3 | TBC1 domain family member 9B                                                                                                                                           |
| 1758                     | Q66K14           | 10                   | 15             | 11.4                  | 1250   | 140525 | 5.3 | TBC1 domain family, member 9B                                                                                                                                          |
| 1758                     | B9A6K8           | 10                   | 15             | 11.4                  | 1250   | 140497 | 5.2 | Isoform 3 of Latrophilin-2                                                                                                                                             |
| 1759                     | O95490-3         | 10                   | 15             | 11.8                  | 1123   | 126162 | 6.9 | Uncharacterized protein                                                                                                                                                |
| 1759                     | A8MW65           | 10                   | 15             | 11.4                  | 1170   | 131524 | 7   | UPI000059CFFE UniRef100 entry                                                                                                                                          |
| 1759                     | UPI000059CFFE    | 10                   | 15             | 9.8                   | 1351   | 151250 | 6.6 | Uncharacterized protein                                                                                                                                                |
| 1759                     | E9PEC7           | 10                   | 15             | 9.6                   | 1391   | 155852 | 6.5 | Latrophilin 2                                                                                                                                                          |
| 1759                     | B1ALU1           | 10                   | 15             | 9.6                   | 1384   | 155548 | 6.1 | Isoform 2 of Latrophilin-2                                                                                                                                             |
| 1759                     | O95490-2         | 10                   | 15             | 9.5                   | 1403   | 157177 | 6.2 | Latrophilin 2                                                                                                                                                          |
| 1759                     | B1ALU2           | 10                   | 15             | 9.4                   | 1416   | 158796 | 6.4 | Latrophilin 2                                                                                                                                                          |
| 1759                     | B1ALU3           | 10                   | 15             | 9.3                   | 1431   | 160514 | 6.3 | Latrophilin-2                                                                                                                                                          |
| 1759                     | O95490           | 10                   | 15             | 9.1                   | 1459   | 163348 | 6.4 | Latrophilin 2                                                                                                                                                          |
| 1759                     | B1ALU5           | 10                   | 15             | 9.1                   | 1461   | 163447 | 6.1 | Latrophilin 2                                                                                                                                                          |
| 1759                     | B1ALU4           | 10                   | 15             | 9                     | 1474   | 165066 | 6.3 | Latrophilin 2                                                                                                                                                          |
| 1760                     | Q9P2M7           | 10                   | 19             | 8.9                   | 1197   | 136386 | 5.5 | Cingulin                                                                                                                                                               |
| 1760                     | B9EK46           | 10                   | 19             | 8.8                   | 1203   | 137103 | 5.5 | SEC16A protein (Fragment)                                                                                                                                              |
| 1761                     | A4QN19           | 10                   | 15             | 7.9                   | 1727   | 186492 | 5.4 | SEC16A protein (Fragment)                                                                                                                                              |
| 1761                     | A4QN18           | 10                   | 15             | 7                     | 1961   | 211073 | 5.5 | Isoform 4 of Protein transport protein Sec16A                                                                                                                          |
| 1761                     | O15027-4         | 10                   | 15             | 6.4                   | 2154   | 231133 | 5.7 | Isoform 2 of Protein transport protein Sec16A                                                                                                                          |
| 1761                     | O15027-2         | 10                   | 15             | 6.4                   | 2134   | 228868 | 5.6 |                                                                                                                                                                        |

Table S1. Proteins identified in the OVCAR-3 tumor supernatant by two or more unique peptides.

| Protein or<br>Group | Accession Number | Unique<br>Peptide<br>Count | Spectrum<br>Count | Sequence<br>Coverage (%) | Length | MolWt  | pI   | Descriptive Name                                                                                                                                                                                                                                                                          |
|---------------------|------------------|----------------------------|-------------------|--------------------------|--------|--------|------|-------------------------------------------------------------------------------------------------------------------------------------------------------------------------------------------------------------------------------------------------------------------------------------------|
| 1761                | O15027-3         | 10                         | 15                | 6.3                      | 2159   | 231249 | 5.6  | Isoform 3 of Protein transport protein Sec16A                                                                                                                                                                                                                                             |
| 1761                | O15027           | 10                         | 15                | 6.3                      | 2179   | 233515 | 5.6  | Protein transport protein Sec16A                                                                                                                                                                                                                                                          |
| 1761                | O15027-5         | 10                         | 15                | 6.2                      | 2201   | 235750 | 5.7  | Isoform 5 of Protein transport protein Sec16A                                                                                                                                                                                                                                             |
| 1762                | Q99102-13        | 10                         | 17                | 14.6                     | 1176   | 130415 | 6.3  | Isoform 13 of Mucin-4<br>Mucin-4 precursor (Pancreatic adenocarcinoma mucin) (Testis mucin) (Ascites sialoglycoprotein) (ASGP) (Tracheobronchial mucin) [Contains: Mucin-4 alpha chain (Ascites sialoglycoprotein 1) (ASGP-1); Mucin-4 beta chain (Ascites sialoglycoprotein 2) (ASGP-2)] |
| 1762                | UPI0001AE7669    | 10                         | 17                | 9                        | 1912   | 203125 | 6    |                                                                                                                                                                                                                                                                                           |
| 1762                | Q99102-17        | 10                         | 17                | 8.9                      | 1943   | 206629 | 6.3  | Isoform 17 of Mucin-4                                                                                                                                                                                                                                                                     |
| 1762                | Q99102           | 10                         | 17                | 7.9                      | 2169   | 231542 | 6.3  | Mucin-4                                                                                                                                                                                                                                                                                   |
| 1762                | E7ESK3           | 10                         | 17                | 3.3                      | 5284   | 530070 | 5.4  | Uncharacterized protein                                                                                                                                                                                                                                                                   |
| 1762                | E9PDY6           | 10                         | 17                | 3.2                      | 5412   | 542314 | 5.3  | Uncharacterized protein                                                                                                                                                                                                                                                                   |
| 1763                | A5D987           | 9                          | 89                | 76.3                     | 152    | 17085  | 6    | Ubiquitin carrier protein                                                                                                                                                                                                                                                                 |
| 1763                | P61088           | 9                          | 89                | 76.3                     | 152    | 17138  | 6.6  | Ubiquitin-conjugating enzyme E2 N Ubiquitin-conjugating enzyme E2 N                                                                                                                                                                                                                       |
| 1764                | P60660           | 9                          | 141               | 73.5                     | 151    | 16930  | 4.7  | Myosin light polypeptide 6 Myosin light polypeptide 6                                                                                                                                                                                                                                     |
| 1765                | P67870           | 9                          | 58                | 67.4                     | 215    | 24942  | 5.6  | Casein kinase II subunit beta Casein kinase II subunit beta                                                                                                                                                                                                                               |
| 1766                | Q3SYF1           | 9                          | 30                | 64.2                     | 162    | 18885  | 8.4  | Sorting nexin 12 Sorting nexin 12                                                                                                                                                                                                                                                         |
| 1766                | O70493           | 9                          | 30                | 63                       | 165    | 19116  | 7.3  | Sorting nexin-12                                                                                                                                                                                                                                                                          |
| 1766                | D3ZDQ6           | 9                          | 30                | 62.7                     | 166    | 19246  | 7.2  | Uncharacterized protein                                                                                                                                                                                                                                                                   |
| 1766                | D4A719           | 9                          | 30                | 61.2                     | 170    | 19808  | 8.4  | Uncharacterized protein                                                                                                                                                                                                                                                                   |
| 1766                | UPI0000D61D89    | 9                          | 30                | 60.5                     | 172    | 19819  | 7.8  | Sorting nexin-12                                                                                                                                                                                                                                                                          |
| 1766                | Q9UMY4           | 9                          | 30                | 60.5                     | 172    | 19730  | 7.9  | Sorting nexin-12                                                                                                                                                                                                                                                                          |
| 1767                | P61020           | 9                          | 76                | 59.5                     | 215    | 23707  | 8.1  | Ras-related protein Rab-5B Ras-related protein Rab-5B                                                                                                                                                                                                                                     |
| 1767                | UPI00006042CF    | 9                          | 76                | 45.7                     | 280    | 30625  | 8    | PREDICTED: ras-related protein Rab-5B                                                                                                                                                                                                                                                     |
| 1768                | Q13185           | 9                          | 144               | 59                       | 183    | 20811  | 5.3  | Chromobox protein log 3 Chromobox protein log 3                                                                                                                                                                                                                                           |
| 1768                | Q32P00           | 9                          | 144               | 59                       | 183    | 20812  | 5.1  | Chromobox log 3 (Drosophila HP1 gamma)                                                                                                                                                                                                                                                    |
| 1769                | P08708           | 9                          | 157               | 57                       | 135    | 15550  | 9.8  | 40S ribosomal protein S17                                                                                                                                                                                                                                                                 |
| 1769                | P63276           | 9                          | 157               | 57                       | 135    | 15524  | 9.8  | 40S ribosomal protein S17                                                                                                                                                                                                                                                                 |
| 1769                | Q8BT90           | 9                          | 157               | 54.6                     | 141    | 16141  | 9.9  | Putative uncharacterized protein (Fragment)                                                                                                                                                                                                                                               |
| 1770                | Q53FX5           | 9                          | 32                | 56.9                     | 197    | 21820  | 8    | Lin-7 log C variant (Fragment)                                                                                                                                                                                                                                                            |
| 1770                | Q9NUP9           | 9                          | 32                | 56.9                     | 197    | 21834  | 8.4  | Protein lin-7 log C Protein lin-7 log C                                                                                                                                                                                                                                                   |
| 1771                | UPI0000565CDE    | 9                          | 144               | 56.8                     | 192    | 21883  | 10   | UPI0000565CDE UniRef100 entry                                                                                                                                                                                                                                                             |
| 1771                | P62081           | 9                          | 144               | 56.2                     | 194    | 22127  | 10.1 | 40S ribosomal protein S7 40S ribosomal protein S7                                                                                                                                                                                                                                         |
| 1772                | P61966           | 9                          | 84                | 54.4                     | 158    | 18733  | 5.7  | AP-1 complex subunit sigma-1A AP-1 complex subunit sigma-1A                                                                                                                                                                                                                               |
| 1772                | UPI000198CE93    | 9                          | 84                | 45                       | 191    | 22178  | 9.2  | UPI000198CE93 UniRef100 entry                                                                                                                                                                                                                                                             |
| 1773                | P41223           | 9                          | 54                | 53.5                     | 144    | 17000  | 8.8  | Protein BUD31 log Protein BUD31 log                                                                                                                                                                                                                                                       |
| 1774                | P62805           | 9                          | 420               | 53.4                     | 103    | 11367  | 11.4 | Histone H4 Histone H4                                                                                                                                                                                                                                                                     |
| 1775                | P62158           | 9                          | 32                | 69.1                     | 149    | 16838  | 4.2  | Calmodulin Calmodulin                                                                                                                                                                                                                                                                     |
| 1775                | E7ETZ0           | 9                          | 32                | 68.7                     | 150    | 16966  | 4.2  | Uncharacterized protein                                                                                                                                                                                                                                                                   |
| 1775                | UPI00018815D7    | 9                          | 32                | 55.1                     | 187    | 20762  | 4.4  | UPI00018815D7 UniRef100 entry                                                                                                                                                                                                                                                             |
| 1775                | E7EMB3           | 9                          | 32                | 52.6                     | 196    | 21689  | 4.6  | Uncharacterized protein                                                                                                                                                                                                                                                                   |
| 1775                | Q3UKW2           | 9                          | 32                | 52.3                     | 197    | 21560  | 4.3  | Putative uncharacterized protein                                                                                                                                                                                                                                                          |
| 1776                | Q95372           | 9                          | 46                | 51.5                     | 231    | 24737  | 7.2  | Acyl-protein thioesterase 2                                                                                                                                                                                                                                                               |
| 1776                | Q9WTL7           | 9                          | 46                | 51.5                     | 231    | 24794  | 7.2  | Acyl-protein thioesterase 2                                                                                                                                                                                                                                                               |
| 1777                | Q9NRW1           | 9                          | 128               | 51                       | 208    | 23462  | 5.5  | Ras-related protein Rab-6B Ras-related protein Rab-6B                                                                                                                                                                                                                                     |
| 1778                | P60953           | 9                          | 82                | 62.8                     | 191    | 21259  | 6.5  | Cell division control protein 42 log Cell division control protein 42 log                                                                                                                                                                                                                 |
| 1778                | B4E1U9           | 9                          | 82                | 50.8                     | 236    | 26528  | 7.6  | cDNA FLJ54776, highly similar to Cell division control protein 42 log                                                                                                                                                                                                                     |
| 1779                | Q922F4           | 9                          | 86                | 45                       | 447    | 50090  | 4.9  | Tubulin beta-6 chain Tubulin beta-6 chain                                                                                                                                                                                                                                                 |
| 1780                | B2RE59           | 9                          | 10                | 40.1                     | 299    | 33617  | 8    | cDNA, FLJ93148, highly similar to sapiens RCD1 required for cell differentiation1 log (S. pombe) (RQCD1), mRNA                                                                                                                                                                            |
| 1780                | Q9JKY0           | 9                          | 10                | 40.1                     | 299    | 33601  | 8    | Cell differentiation protein RCD1 log                                                                                                                                                                                                                                                     |
| 1780                | Q92600           | 9                          | 10                | 40.1                     | 299    | 33631  | 8    | Cell differentiation protein RCD1 log                                                                                                                                                                                                                                                     |
| 1781                | Q8VE80           | 9                          | 12                | 39.9                     | 351    | 38738  | 6.1  | THO complex subunit 3                                                                                                                                                                                                                                                                     |
| 1781                | Q96J01           | 9                          | 12                | 39.9                     | 351    | 38772  | 6.1  | THO complex subunit 3                                                                                                                                                                                                                                                                     |
| 1782                | P62753           | 9                          | 120               | 33.3                     | 249    | 28681  | 10.8 | 40S ribosomal protein S6 40S ribosomal protein S6                                                                                                                                                                                                                                         |
| 1782                | Q96DV6           | 9                          | 120               | 33.3                     | 249    | 28709  | 10.9 | 40S ribosomal protein S6                                                                                                                                                                                                                                                                  |
| 1783                | Q9CWZ7           | 9                          | 15                | 30.8                     | 312    | 34732  | 5.4  | Gamma-soluble NSF attachment protein                                                                                                                                                                                                                                                      |
| 1783                | Q99747           | 9                          | 15                | 30.8                     | 312    | 34746  | 5.4  | Gamma-soluble NSF attachment protein                                                                                                                                                                                                                                                      |
| 1783                | D3Z4B2           | 9                          | 15                | 27.2                     | 353    | 39367  | 6    | Uncharacterized protein                                                                                                                                                                                                                                                                   |
| 1784                | B2R9L6           | 9                          | 15                | 23.1                     | 372    | 42747  | 8.8  | cDNA, FLJ94450, highly similar to sapiens cyclin-dependent kinase 9 (CDC2-related kinase) (CDK9), mRNA                                                                                                                                                                                    |
| 1784                | Q99J95           | 9                          | 15                | 23.1                     | 372    | 42762  | 8.8  | Cyclin-dependent kinase 9                                                                                                                                                                                                                                                                 |
| 1784                | P50750           | 9                          | 15                | 23.1                     | 372    | 42778  | 8.8  | Cyclin-dependent kinase 9                                                                                                                                                                                                                                                                 |
| 1784                | C9E1C9           | 9                          | 15                | 23.1                     | 372    | 42762  | 8.9  | CDK9                                                                                                                                                                                                                                                                                      |
| 1784                | B5BU53           | 9                          | 15                | 23.1                     | 372    | 42779  | 8.7  | Cyclin-dependent kinase 9                                                                                                                                                                                                                                                                 |
| 1784                | P50750-2         | 9                          | 15                | 17.6                     | 489    | 53365  | 9.5  | Isoform 2 of Cyclin-dependent kinase 9                                                                                                                                                                                                                                                    |
| 1785                | C9J2R9           | 9                          | 28                | 24.8                     | 460    | 51567  | 5.5  | Uncharacterized protein                                                                                                                                                                                                                                                                   |
| 1785                | A3KGC1           | 9                          | 28                | 21                       | 544    | 60781  | 5.4  | p21 (CDKN1A)-activated kinase 3                                                                                                                                                                                                                                                           |
| 1785                | Q75914-2         | 9                          | 28                | 21                       | 544    | 60693  | 5.5  | Isoform 2 of Serine/threonine-protein kinase PAK 3                                                                                                                                                                                                                                        |
| 1785                | Q61036           | 9                          | 28                | 20.4                     | 559    | 62398  | 5.4  | Serine/threonine-protein kinase PAK 3                                                                                                                                                                                                                                                     |
| 1785                | Q75914           | 9                          | 28                | 20.4                     | 559    | 62310  | 5.5  | Serine/threonine-protein kinase PAK 3                                                                                                                                                                                                                                                     |
| 1785                | B1GX80           | 9                          | 28                | 20.2                     | 565    | 63001  | 5.5  | PAK3c protein                                                                                                                                                                                                                                                                             |
| 1785                | B1GX78           | 9                          | 28                | 20.2                     | 565    | 62913  | 5.6  | PAK3c protein                                                                                                                                                                                                                                                                             |
| 1785                | B1GX81           | 9                          | 28                | 19.7                     | 580    | 64618  | 5.5  | PAK3cb protein                                                                                                                                                                                                                                                                            |
| 1785                | B1GX79           | 9                          | 28                | 19.7                     | 580    | 64530  | 5.5  | PAK3cb protein                                                                                                                                                                                                                                                                            |
| 1786                | Q9DAW6           | 9                          | 14                | 20.2                     | 521    | 58370  | 7.3  | U4/U6 small nuclear ribonucleoprotein Prp4                                                                                                                                                                                                                                                |
| 1786                | Q8BTJ0           | 9                          | 14                | 20.2                     | 521    | 58354  | 7.4  | Putative uncharacterized protein                                                                                                                                                                                                                                                          |
| 1786                | Q6IAP9           | 9                          | 14                | 20.2                     | 521    | 58307  | 7.4  | PRPF4 protein                                                                                                                                                                                                                                                                             |
| 1786                | B2R7V4           | 9                          | 14                | 20.1                     | 522    | 58449  | 7.4  | cDNA, FLJ93619, highly similar to sapiens PRP4 pre-mRNA processing factor 4 log (yeast) (PRPF4), mRNA                                                                                                                                                                                     |
| 1786                | Q43172           | 9                          | 14                | 20.1                     | 522    | 58449  | 7.4  | U4/U6 small nuclear ribonucleoprotein Prp4                                                                                                                                                                                                                                                |
| 1786                | Q59EL4           | 9                          | 14                | 19.6                     | 537    | 60022  | 7.6  | PRPF4 protein variant (Fragment)                                                                                                                                                                                                                                                          |
| 1787                | B4E0H3           | 9                          | 20                | 18.5                     | 610    | 66573  | 9    | cDNA, FLJ53386, highly similar to Signal recognition particle receptor subunit alpha                                                                                                                                                                                                      |
| 1787                | E9PJS4           | 9                          | 20                | 18.5                     | 610    | 66559  | 9    | Uncharacterized protein                                                                                                                                                                                                                                                                   |
| 1787                | Q9DBG7           | 9                          | 20                | 17.8                     | 636    | 69623  | 9    | Signal recognition particle receptor subunit alpha                                                                                                                                                                                                                                        |
| 1787                | Q6IAX9           | 9                          | 20                | 17.7                     | 638    | 69894  | 9    | SRPR protein                                                                                                                                                                                                                                                                              |
| 1787                | P08240           | 9                          | 20                | 17.7                     | 638    | 69811  | 9    | Signal recognition particle receptor subunit alpha                                                                                                                                                                                                                                        |
| 1788                | A8DUV1           | 9                          | 306               | 83.8                     | 142    | 15141  | 8.2  | Alpha-globin                                                                                                                                                                                                                                                                              |
| 1789                | P61750           | 9                          | 260               | 76.1                     | 180    | 20397  | 7.2  | ADP-ribosylation factor 4                                                                                                                                                                                                                                                                 |
| 1790                | Q05816           | 9                          | 100               | 72.6                     | 135    | 15137  | 6.5  | Fatty acid-binding protein, epidermal                                                                                                                                                                                                                                                     |
| 1791                | P62962           | 9                          | 257               | 72.1                     | 140    | 14957  | 8.3  | Profilin-1                                                                                                                                                                                                                                                                                |
| 1792                | Q9CQI6           | 9                          | 75                | 70.4                     | 142    | 15944  | 5.4  | Coactosin-like protein                                                                                                                                                                                                                                                                    |
| 1793                | P04247           | 9                          | 25                | 66.9                     | 154    | 17070  | 7.6  | Myoglobin                                                                                                                                                                                                                                                                                 |
| 1794                | Q06092           | 9                          | 23                | 65.1                     | 238    | 25379  | 5.1  | Proteasome subunit beta type-6                                                                                                                                                                                                                                                            |
| 1795                | P35285           | 9                          | 17                | 60.8                     | 194    | 21802  | 8.2  | Ras-related protein Rab-22A                                                                                                                                                                                                                                                               |
| 1796                | Q9CRC9           | 9                          | 38                | 58.3                     | 276    | 31084  | 6.9  | Glucosamine-6-phosphate isomerase 2                                                                                                                                                                                                                                                       |
| 1797                | Q9WTP6-2         | 9                          | 20                | 59.5                     | 232    | 25606  | 7.4  | Isoform 2 of Adenylate kinase 2, mitochondrial                                                                                                                                                                                                                                            |
| 1797                | Q9WTP6           | 9                          | 20                | 57.7                     | 239    | 26469  | 7.4  | Adenylate kinase 2, mitochondrial                                                                                                                                                                                                                                                         |

Table S1. Proteins identified in the OVCAR-3 tumor supernatant by two or more unique peptides.

| Protein or Protein Group | Accession Number | Unique Peptide Count | Spectrum Count | Sequence Coverage (%) | Length | MolWt  | pI   | Descriptive Name                                                                                                                                 |
|--------------------------|------------------|----------------------|----------------|-----------------------|--------|--------|------|--------------------------------------------------------------------------------------------------------------------------------------------------|
| 1798                     | Q3TKM9           | 9                    | 45             | 57.6                  | 151    | 16228  | 5.7  | Actin-related protein 2/3 complex subunit 5                                                                                                      |
| 1798                     | Q9CPW4           | 9                    | 45             | 57.6                  | 151    | 16288  | 5.7  | Actin-related protein 2/3 complex subunit 5                                                                                                      |
| 1799                     | Q9CQW1           | 9                    | 25             | 56.1                  | 198    | 22314  | 6.4  | Synaptobrevin homolog YKT6                                                                                                                       |
| 1800                     | Q3TF84           | 9                    | 68             | 54.3                  | 186    | 20409  | 6.7  | Putative uncharacterized protein                                                                                                                 |
| 1800                     | Q922Q8           | 9                    | 68             | 32.9                  | 307    | 34877  | 9.5  | Leucine-rich repeat-containing protein 59                                                                                                        |
| 1801                     | P10649           | 9                    | 13             | 53.2                  | 218    | 25970  | 8    | Glutathione S-transferase Mu 1                                                                                                                   |
| 1802                     | Q9QXT0           | 9                    | 33             | 52.7                  | 182    | 20767  | 5.1  | Protein canopy homolog 2                                                                                                                         |
| 1803                     | P63325           | 9                    | 159            | 51.5                  | 165    | 18916  | 10.2 | 40S ribosomal protein S10                                                                                                                        |
| 1803                     | Q3U9P0           | 9                    | 159            | 51.5                  | 165    | 18931  | 10.3 | Putative uncharacterized protein                                                                                                                 |
| 1804                     | Q9VWQ5           | 9                    | 33             | 49.8                  | 241    | 26949  | 6.9  | Probable methylthioribulose-1-phosphate dehydratase                                                                                              |
| 1805                     | P15327           | 9                    | 13             | 49.4                  | 259    | 29978  | 7.1  | Bisphosphoglycerate mutase                                                                                                                       |
| 1806                     | Q08807           | 9                    | 23             | 48.9                  | 274    | 31053  | 7.2  | Peroxiredoxin-4                                                                                                                                  |
| 1807                     | D3Z7T1           | 9                    | 13             | 48.6                  | 280    | 32524  | 4.9  | Uncharacterized protein                                                                                                                          |
| 1807                     | Q8BH97           | 9                    | 13             | 41.5                  | 328    | 38002  | 4.9  | Reticulocalbin-3                                                                                                                                 |
| 1808                     | Q08583           | 9                    | 57             | 48.2                  | 255    | 26940  | 11.2 | THO complex subunit 4                                                                                                                            |
| 1809                     | P19157           | 9                    | 51             | 48.1                  | 210    | 23609  | 7.8  | Glutathione S-transferase P 1                                                                                                                    |
| 1810                     | Q3UJ44           | 9                    | 22             | 46.1                  | 349    | 38670  | 6.7  | Putative uncharacterized protein                                                                                                                 |
| 1810                     | Q99LB4           | 9                    | 22             | 46.1                  | 349    | 38769  | 6.9  | Capping protein (Actin filament), gelsolin-like                                                                                                  |
| 1811                     | P55258           | 9                    | 65             | 44.9                  | 207    | 23668  | 9.1  | Ras-related protein Rab-8A                                                                                                                       |
| 1811                     | Q3UHW5           | 9                    | 65             | 44.7                  | 208    | 23635  | 8.5  | Putative uncharacterized protein                                                                                                                 |
| 1812                     | Q6PJ18           | 9                    | 24             | 44.7                  | 284    | 32958  | 4.7  | Tpm2 protein                                                                                                                                     |
| 1813                     | Q9D1M0           | 9                    | 17             | 41.3                  | 322    | 35566  | 5.4  | Protein SEC13 homolog                                                                                                                            |
| 1814                     | Q9R1T2           | 9                    | 34             | 37.4                  | 350    | 38620  | 5.4  | SUMO-activating enzyme subunit 1                                                                                                                 |
| 1815                     | Q3TCE7           | 9                    | 20             | 36.8                  | 372    | 41092  | 8.3  | Putative uncharacterized protein                                                                                                                 |
| 1815                     | Q9VW32           | 9                    | 20             | 36.8                  | 372    | 41149  | 8.4  | Actin-related protein 2/3 complex subunit 1B                                                                                                     |
| 1815                     | Q9CRC4           | 9                    | 20             | 36.8                  | 372    | 41064  | 8.4  | Actin related protein 2/3 complex, subunit 1B                                                                                                    |
| 1815                     | Q3U094           | 9                    | 20             | 36.8                  | 372    | 41065  | 8.1  | Putative uncharacterized protein                                                                                                                 |
| 1815                     | Q91Z25           | 9                    | 20             | 36.4                  | 376    | 41498  | 8.4  | Arpc1b protein                                                                                                                                   |
| 1816                     | Q99J77           | 9                    | 21             | 36.8                  | 359    | 40024  | 7.1  | N-acetylneuraminic acid synthase (Sialic acid synthase)                                                                                          |
| 1817                     | Q14AA6           | 9                    | 46             | 35.2                  | 216    | 24357  | 8    | MCG49183                                                                                                                                         |
| 1818                     | Q9D1E6           | 9                    | 19             | 34.4                  | 244    | 27386  | 5.2  | Tubulin-folding cofactor B                                                                                                                       |
| 1819                     | Q3UGC7           | 9                    | 18             | 34.1                  | 261    | 29344  | 4.8  | Eukaryotic translation initiation factor 3, subunit J                                                                                            |
| 1819                     | Q66JS6           | 9                    | 18             | 33.8                  | 263    | 29486  | 4.8  | Eukaryotic translation initiation factor 3 subunit J                                                                                             |
| 1820                     | Q8K183           | 9                    | 10             | 34                    | 312    | 35015  | 6.3  | Pyridoxal kinase                                                                                                                                 |
| 1821                     | Q07456           | 9                    | 29             | 33                    | 349    | 39029  | 6.3  | Protein AMBP                                                                                                                                     |
| 1822                     | Q9CXX7           | 9                    | 43             | 31.4                  | 287    | 32266  | 9.9  | Putative uncharacterized protein                                                                                                                 |
| 1822                     | Q62189           | 9                    | 43             | 31.4                  | 287    | 31835  | 9.8  | U1 small nuclear ribonucleoprotein A                                                                                                             |
| 1822                     | E9Q4T6           | 9                    | 43             | 31.2                  | 288    | 32353  | 9.9  | Uncharacterized protein                                                                                                                          |
| 1823                     | Q61247           | 9                    | 50             | 30.5                  | 491    | 54972  | 6.3  | Alpha-2-antiplasmin                                                                                                                              |
| 1824                     | UPI0001E6B548    | 9                    | 31             | 31                    | 432    | 47256  | 6.7  | PREDICTED: protein disulfide-isomerase A6-like                                                                                                   |
| 1824                     | Q922R8           | 9                    | 31             | 30.5                  | 440    | 48100  | 5.1  | Protein disulfide-isomerase A6                                                                                                                   |
| 1825                     | Q01339           | 9                    | 19             | 29                    | 345    | 38619  | 8.2  | Beta-2-glycoprotein 1                                                                                                                            |
| 1825                     | Q9CY42           | 9                    | 19             | 29                    | 345    | 38688  | 8.3  | Putative uncharacterized protein                                                                                                                 |
| 1826                     | Q99020           | 9                    | 112            | 33.7                  | 285    | 30831  | 7.9  | Heterogeneous nuclear ribonucleoprotein A/B                                                                                                      |
| 1826                     | Q3TMZ8           | 9                    | 112            | 29.5                  | 325    | 35595  | 6.9  | Putative uncharacterized protein                                                                                                                 |
| 1826                     | Q20BD0           | 9                    | 112            | 28.9                  | 332    | 36211  | 6.9  | Heterogeneous nuclear ribonucleoprotein A/B                                                                                                      |
| 1827                     | E9QN57           | 9                    | 31             | 26.2                  | 362    | 40539  | 5.3  | Uncharacterized protein                                                                                                                          |
| 1827                     | Q99L47           | 9                    | 31             | 25.6                  | 371    | 41656  | 5.3  | Hsc70-interacting protein                                                                                                                        |
| 1827                     | Q3U9V1           | 9                    | 31             | 25.6                  | 371    | 41655  | 5.4  | Putative uncharacterized protein                                                                                                                 |
| 1827                     | Q3U8D2           | 9                    | 31             | 25.6                  | 371    | 41557  | 5.2  | Putative uncharacterized protein                                                                                                                 |
| 1828                     | P32067           | 9                    | 30             | 23.4                  | 415    | 47756  | 9.8  | Lupus La protein homolog                                                                                                                         |
| 1828                     | Q8BTU4           | 9                    | 30             | 23.4                  | 415    | 47657  | 9.7  | Putative uncharacterized protein                                                                                                                 |
| 1829                     | Q8R2Y2-2         | 9                    | 24             | 20.5                  | 606    | 66901  | 5.8  | Isoform 2 of Cell surface glycoprotein MUC18                                                                                                     |
| 1829                     | Q8R2Y2           | 9                    | 24             | 19.1                  | 648    | 71546  | 5.8  | Cell surface glycoprotein MUC18                                                                                                                  |
| 1830                     | P48722-2         | 9                    | 14             | 18.4                  | 817    | 92252  | 5.9  | Isoform 2 of Heat shock 70 kDa protein 4L                                                                                                        |
| 1830                     | P48722           | 9                    | 14             | 17.9                  | 838    | 94382  | 5.7  | Heat shock 70 kDa protein 4L                                                                                                                     |
| 1831                     | Q99KC8           | 9                    | 17             | 16.8                  | 793    | 87143  | 6.6  | von Willebrand factor A domain-containing protein 5A                                                                                             |
| 1832                     | P20060           | 9                    | 15             | 16.4                  | 536    | 61116  | 8.1  | Beta-hexosaminidase subunit beta                                                                                                                 |
| 1833                     | A0AUN0           | 9                    | 19             | 15.1                  | 842    | 95117  | 6    | Sec23ip protein (Fragment)                                                                                                                       |
| 1833                     | Q6NZC7           | 9                    | 19             | 12.7                  | 998    | 110780 | 5.9  | SEC23-interacting protein                                                                                                                        |
| 1833                     | Q4G0C0           | 9                    | 19             | 12.7                  | 998    | 110751 | 5.7  | Sec23 interacting protein                                                                                                                        |
| 1834                     | Q99KD5           | 9                    | 10             | 11.8                  | 944    | 103447 | 6.3  | Protein unc-45 homolog A                                                                                                                         |
| 1835                     | UPI000024F693    | 9                    | 20             | 11.6                  | 1085   | 124462 | 5.2  | UPI000024F693 UniRef100 entry                                                                                                                    |
| 1836                     | Q3UMB9           | 9                    | 18             | 11.1                  | 1173   | 136370 | 7.4  | WASH complex subunit 7                                                                                                                           |
| 1837                     | Q6Z058           | 9                    | 47             | 10.7                  | 1072   | 121152 | 8.8  | La-related protein 1                                                                                                                             |
| 1837                     | UPI00001E46C4    | 9                    | 47             | 10.7                  | 1072   | 121125 | 8.8  | la-related protein 1                                                                                                                             |
| 1838                     | UPI0001F795E5    | 9                    | 16             | 8.4                   | 1222   | 115176 | 8.4  | UPI0001F795E5 UniRef100 entry                                                                                                                    |
| 1838                     | Q8K173           | 9                    | 16             | 8.4                   | 1222   | 115140 | 8.4  | Col3a1 protein (Fragment)                                                                                                                        |
| 1838                     | P08121           | 9                    | 16             | 7                     | 1464   | 138944 | 6.5  | Collagen alpha-1(III) chain                                                                                                                      |
| 1838                     | Q8BLW4           | 9                    | 16             | 7                     | 1464   | 138942 | 6.6  | Putative uncharacterized protein                                                                                                                 |
| 1838                     | Q8BKY2           | 9                    | 16             | 7                     | 1464   | 138947 | 6.5  | Putative uncharacterized protein                                                                                                                 |
| 1838                     | Q7TT32           | 9                    | 16             | 7                     | 1464   | 138972 | 6.5  | Collagen, type III, alpha 1                                                                                                                      |
| 1838                     | Q3UH72           | 9                    | 16             | 7                     | 1464   | 138886 | 6.6  | Putative uncharacterized protein                                                                                                                 |
| 1839                     | Q64511           | 9                    | 13             | 6.8                   | 1612   | 181908 | 8.3  | DNA topoisomerase 2-beta                                                                                                                         |
| 1840                     | E9QP46           | 9                    | 17             | 1.5                   | 6870   | 782157 | 5.3  | Uncharacterized protein                                                                                                                          |
| 1840                     | Q6ZWQ0           | 9                    | 17             | 1.5                   | 6874   | 782738 | 5.3  | Nesprin-2                                                                                                                                        |
| 1841                     | P49773           | 9                    | 84             | 81                    | 126    | 13802  | 7    | Histidine triad nucleotide-binding protein 1                                                                                                     |
| 1842                     | Q9UHA4           | 9                    | 29             | 80.6                  | 124    | 13623  | 7.4  | Ragulator complex protein LAMTOR3                                                                                                                |
| 1843                     | P00441           | 9                    | 144            | 79.9                  | 154    | 15936  | 6.1  | Superoxide dismutase [Cu-Zn]                                                                                                                     |
| 1844                     | O75884           | 9                    | 22             | 79.6                  | 186    | 21000  | 6.2  | Putative hydrolase RBBP9                                                                                                                         |
| 1845                     | P31949           | 9                    | 158            | 76.2                  | 105    | 11740  | 7.2  | Protein S100-A11                                                                                                                                 |
| 1846                     | UPI0001F78044    | 9                    | 15             | 78.5                  | 158    | 17234  | 5.4  | UPI0001F78044 UniRef100 entry                                                                                                                    |
| 1846                     | Q8TDP1           | 9                    | 15             | 75.6                  | 164    | 17840  | 5    | Ribonuclease H2 subunit C                                                                                                                        |
| 1847                     | P46926           | 9                    | 72             | 75.4                  | 289    | 32668  | 6.9  | Glucosamine-6-phosphate isomerase 1                                                                                                              |
| 1848                     | Q8WZ82           | 9                    | 19             | 75.3                  | 227    | 24418  | 6.9  | Ovarian cancer-associated gene 2 protein                                                                                                         |
| 1849                     | P24666           | 9                    | 67             | 72.8                  | 158    | 18042  | 6.8  | Low molecular weight phosphotyrosine protein phosphatase                                                                                         |
| 1849                     | Q59EH3           | 9                    | 67             | 69.7                  | 165    | 18698  | 7.9  | Acid phosphatase 1 isoform c variant (Fragment)                                                                                                  |
| 1850                     | O14933           | 9                    | 43             | 71.9                  | 153    | 17769  | 7.9  | Ubiquitin/ISG15-conjugating enzyme E2 L6                                                                                                         |
| 1851                     | P55957           | 9                    | 43             | 71.8                  | 195    | 21995  | 5.4  | BH3-interacting domain death agonist                                                                                                             |
| 1851                     | P55957-2         | 9                    | 43             | 58.1                  | 241    | 26836  | 7.1  | Isoform 2 of BH3-interacting domain death agonist                                                                                                |
| 1852                     | P04632           | 9                    | 149            | 71.6                  | 268    | 28316  | 5.2  | Calpain small subunit 1                                                                                                                          |
| 1853                     | P28072           | 9                    | 26             | 66.9                  | 239    | 25358  | 4.9  | Proteasome subunit beta type-6                                                                                                                   |
| 1854                     | O43324           | 9                    | 18             | 66.7                  | 174    | 19811  | 8.6  | Eukaryotic translation elongation factor 1 epsilon-1                                                                                             |
| 1855                     | Q13232           | 9                    | 36             | 66.3                  | 169    | 19015  | 7.8  | Nucleoside diphosphate kinase 3<br>cDNA, FLJ95208, highly similar to sapiens PYD and CARD domain containing (PYCARD), transcript variant 1, mRNA |
| 1856                     | B2RAZ4           | 9                    | 47             | 64.6                  | 195    | 21628  | 5.6  | Apoptosis-associated speck-like protein containing a CARD                                                                                        |
| 1856                     | Q9ULZ3           | 9                    | 47             | 64.6                  | 195    | 21627  | 6.4  | Transcription factor BTF3                                                                                                                        |
| 1857                     | P20290           | 9                    | 92             | 64.6                  | 206    | 22168  | 9.4  | Acyl-protein thioesterase 1                                                                                                                      |
| 1858                     | O75608           | 9                    | 41             | 64.3                  | 230    | 24670  | 6.8  | Uncharacterized protein                                                                                                                          |
| 1859                     | E5RFF9           | 9                    | 13             | 63                    | 192    | 22653  | 4.9  | Uncharacterized protein                                                                                                                          |
| 1859                     | Q9BRT9           | 9                    | 13             | 54.3                  | 223    | 26047  | 5    | DNA replication complex GINS protein SLD5                                                                                                        |
| 1860                     | E9PJF0           | 9                    | 18             | 62.3                  | 316    | 35737  | 8.7  | Uncharacterized protein                                                                                                                          |
| 1860                     | E9PQW4           | 9                    | 18             | 58.1                  | 339    | 38547  | 9    | Uncharacterized protein                                                                                                                          |
| 1860                     | UPI0000D579B4    | 9                    | 18             | 55.2                  | 357    | 40088  | 7.5  | mitogen-activated protein kinase 3 isoform 2                                                                                                     |

Table S1. Proteins identified in the OVCAR-3 tumor supernatant by two or more unique peptides.

| Protein or Protein Group | Accession Number | Unique Peptide Count | Spectrum Count | Sequence Coverage (%) | Length | MolWt | pI   | Descriptive Name                                                                                                                                                                                          |
|--------------------------|------------------|----------------------|----------------|-----------------------|--------|-------|------|-----------------------------------------------------------------------------------------------------------------------------------------------------------------------------------------------------------|
| 1860                     | P27361           | 9                    | 18             | 52                    | 379    | 43136 | 6.8  | Mitogen-activated protein kinase 3                                                                                                                                                                        |
| 1861                     | P52907           | 9                    | 25             | 61.9                  | 286    | 32923 | 5.7  | F-actin-capping protein subunit alpha-1                                                                                                                                                                   |
| 1862                     | C9J0K6           | 9                    | 23             | 72.9                  | 155    | 17605 | 5.6  | Uncharacterized protein                                                                                                                                                                                   |
| 1862                     | A8MTH6           | 9                    | 23             | 61.7                  | 183    | 20345 | 5.3  | Uncharacterized protein                                                                                                                                                                                   |
| 1862                     | P30626           | 9                    | 23             | 57.1                  | 198    | 21676 | 5.6  | Sorcin                                                                                                                                                                                                    |
| 1863                     | P54105           | 9                    | 57             | 61.2                  | 237    | 26215 | 4.1  | Methylosome subunit pICln                                                                                                                                                                                 |
| 1864                     | Q9BUL8           | 9                    | 25             | 59.4                  | 212    | 24702 | 8.2  | Programmed cell death protein 10                                                                                                                                                                          |
| 1865                     | O60362           | 9                    | 15             | 59.1                  | 242    | 27310 | 8.9  | Putative uncharacterized protein 44M2.1                                                                                                                                                                   |
| 1865                     | Q9NXG2           | 9                    | 15             | 40.5                  | 353    | 39315 | 7.9  | THUMP domain-containing protein 1                                                                                                                                                                         |
| 1865                     | UPI000059D337    | 9                    | 15             | 32.6                  | 439    | 48549 | 8.8  | UPI000059D337 UniRef100 entry                                                                                                                                                                             |
| 1865                     | Q6MZT3           | 9                    | 15             | 32.6                  | 439    | 48491 | 8.9  | Putative uncharacterized protein DKFZp686C1054                                                                                                                                                            |
| 1866                     | O43665-3         | 9                    | 29             | 58.6                  | 181    | 21210 | 7.5  | Isoform 3 of Regulator of G-protein signaling 10                                                                                                                                                          |
| 1867                     | Q9BRJ7           | 9                    | 15             | 58.3                  | 211    | 23338 | 8.9  | Protein syndesmos                                                                                                                                                                                         |
| 1868                     | P80188           | 9                    | 30             | 57.6                  | 198    | 22588 | 8.9  | Neutrophil gelatinase-associated lipocalin                                                                                                                                                                |
| 1868                     | B2ZDQ1           | 9                    | 30             | 57.3                  | 199    | 22687 | 8.9  | Neutrophil gelatinase-associated lipocalin<br>Neutrophil gelatinase-associated lipocalin precursor (NGAL) (p25)<br>(25 kDa alpha-2-microglobulin-related subunit of MMP-9) (Lipocalin-2) (Oncogene 24p3). |
| 1868                     | UPI0000D61913    | 9                    | 30             | 57                    | 200    | 22902 | 8.9  | 8.9                                                                                                                                                                                                       |
| 1869                     | P13693           | 9                    | 82             | 57                    | 172    | 19595 | 4.9  | Translationally-controlled tumor protein                                                                                                                                                                  |
| 1869                     | Q5W0H4           | 9                    | 82             | 52.1                  | 188    | 21526 | 5.5  | Tumor protein, translationally-controlled 1                                                                                                                                                               |
| 1870                     | P56537           | 9                    | 43             | 56.7                  | 245    | 26599 | 4.7  | Eukaryotic translation initiation factor 6                                                                                                                                                                |
| 1871                     | P09417           | 9                    | 23             | 56.6                  | 244    | 25789 | 7.4  | Dihydropteridine reductase<br>cDNA FLJ51791, highly similar to Lactoylglutathione lyase (EC 4.4.1.5)                                                                                                      |
| 1872                     | B4DDV0           | 9                    | 83             | 55.6                  | 169    | 19103 | 6    | 6                                                                                                                                                                                                         |
| 1872                     | Q04760           | 9                    | 83             | 51.1                  | 184    | 20778 | 5.3  | Lactoylglutathione lyase                                                                                                                                                                                  |
| 1873                     | Q9NZD2           | 9                    | 14             | 54.5                  | 209    | 23850 | 7.4  | Glycolipid transfer protein                                                                                                                                                                               |
| 1874                     | P07451           | 9                    | 31             | 53.8                  | 260    | 29557 | 7.3  | Carbonic anhydrase 3                                                                                                                                                                                      |
| 1875                     | D6RD78           | 9                    | 88             | 52.9                  | 191    | 21246 | 10   | Uncharacterized protein                                                                                                                                                                                   |
| 1875                     | Q96AG4           | 9                    | 88             | 32.9                  | 307    | 34930 | 9.6  | Leucine-rich repeat-containing protein 59                                                                                                                                                                 |
| 1876                     | P60983           | 9                    | 36             | 57                    | 142    | 16713 | 5.3  | Glia maturation factor beta                                                                                                                                                                               |
| 1876                     | E7EWZ9           | 9                    | 36             | 52.9                  | 153    | 18053 | 5.3  | Uncharacterized protein                                                                                                                                                                                   |
| 1876                     | Q9BS35           | 9                    | 36             | 52.6                  | 154    | 18110 | 5.3  | GMFB protein                                                                                                                                                                                              |
| 1877                     | Q9UL25           | 9                    | 35             | 52                    | 225    | 24348 | 7.9  | Ras-related protein Rab-21<br>IRNA (adenine-N(1)-methyltransferase catalytic subunit TRMT61A)                                                                                                             |
| 1878                     | Q96FX7           | 9                    | 23             | 51.6                  | 289    | 31382 | 7.4  | 7.4                                                                                                                                                                                                       |
| 1879                     | Q9Y3C1           | 9                    | 20             | 51.1                  | 178    | 21188 | 9.9  | Nucleolar protein 16                                                                                                                                                                                      |
| 1880                     | UPI0001F76FA6    | 9                    | 19             | 50.6                  | 261    | 29737 | 6.2  | HSPE1-MOBK3 protein                                                                                                                                                                                       |
| 1881                     | B7ZAD1           | 9                    | 24             | 50                    | 240    | 27295 | 8.7  | NAD(P)H dehydrogenase, quinone 1, isoform CRA_b                                                                                                                                                           |
| 1881                     | P15559           | 9                    | 24             | 43.8                  | 274    | 30868 | 8.9  | NAD(P)H dehydrogenase [quinone] 1                                                                                                                                                                         |
| 1882                     | Q5HYI5           | 9                    | 84             | 49.8                  | 209    | 23420 | 7.5  | Putative uncharacterized protein DKFZp313C1541                                                                                                                                                            |
| 1882                     | B4WUD1           | 9                    | 84             | 48.1                  | 216    | 24214 | 7.8  | Ras-related protein Rab-2B                                                                                                                                                                                |
| 1883                     | P10746           | 9                    | 20             | 48.7                  | 265    | 28628 | 5.5  | Uroporphyrinogen-III synthase                                                                                                                                                                             |
| 1884                     | Q9H9Q2           | 9                    | 31             | 48.5                  | 264    | 29622 | 6.2  | COP9 signalosome complex subunit 7b                                                                                                                                                                       |
| 1885                     | P37235           | 9                    | 15             | 47.7                  | 193    | 22313 | 5.4  | Hippocalcin-like protein 1<br>Isoform 2 of Acidic leucine-rich nuclear phosphoprotein 32 family member B                                                                                                  |
| 1886                     | Q92688-2         | 9                    | 53             | 60                    | 195    | 22277 | 4.3  | 4.3                                                                                                                                                                                                       |
| 1886                     | Q53F35           | 9                    | 53             | 46.8                  | 250    | 28673 | 4.1  | Acidic (Leucine-rich) nuclear phosphoprotein 32 family, member B variant (Fragment)                                                                                                                       |
| 1886                     | Q92688           | 9                    | 53             | 46.6                  | 251    | 28788 | 4.1  | Acidic leucine-rich nuclear phosphoprotein 32 family member B                                                                                                                                             |
| 1887                     | Q9NZD8           | 9                    | 11             | 45.8                  | 308    | 34960 | 6.3  | Masparidin                                                                                                                                                                                                |
| 1888                     | P40306           | 9                    | 13             | 45.1                  | 273    | 28936 | 7.8  | Proteasome subunit beta type-10                                                                                                                                                                           |
| 1889                     | B4DDF4           | 9                    | 49             | 45                    | 298    | 32617 | 7    | cDNA FLJ52469, highly similar to Calponin-2                                                                                                                                                               |
| 1889                     | Q99439           | 9                    | 49             | 43.4                  | 309    | 33697 | 7.3  | Calponin-2                                                                                                                                                                                                |
| 1889                     | Q6FHE4           | 9                    | 49             | 43.4                  | 309    | 33709 | 7.3  | CNN2 protein                                                                                                                                                                                              |
| 1889                     | B4DUT8           | 9                    | 49             | 40.6                  | 330    | 35944 | 7.3  | cDNA FLJ52765, highly similar to Calponin-2                                                                                                                                                               |
| 1890                     | P25325           | 9                    | 14             | 44.4                  | 297    | 33178 | 6.6  | 3-mercaptopyruvate sulfurtransferase                                                                                                                                                                      |
| 1890                     | UPI000057921F    | 9                    | 14             | 41.6                  | 317    | 35250 | 6.6  | 3-mercaptopyruvate sulfurtransferase isoform 1                                                                                                                                                            |
| 1891                     | Q7L266           | 9                    | 18             | 44.2                  | 308    | 32055 | 6.2  | L-asparaginase                                                                                                                                                                                            |
| 1892                     | Q96C19           | 9                    | 31             | 44.2                  | 240    | 26697 | 5.2  | EF-hand domain-containing protein D2                                                                                                                                                                      |
| 1893                     | Q9NRD1           | 9                    | 15             | 44                    | 293    | 33933 | 6.1  | F-box only protein 6                                                                                                                                                                                      |
| 1894                     | UPI0001E8F1C3    | 9                    | 34             | 54.9                  | 244    | 26976 | 6.5  | UPI0001E8F1C3 UniRef100 entry                                                                                                                                                                             |
| 1894                     | Q94903           | 9                    | 34             | 48.7                  | 275    | 30344 | 7.5  | Proline synthase co-transcribed bacterial log protein                                                                                                                                                     |
| 1894                     | D3DSW3           | 9                    | 34             | 43.2                  | 310    | 34042 | 8.4  | Proline synthetase co-transcribed log (Bacterial), isoform CRA_b                                                                                                                                          |
| 1895                     | B4DXQ8           | 9                    | 30             | 44.6                  | 260    | 29132 | 9.6  | cDNA FLJ52940, highly similar to Mortality factor 4-like protein 2<br>cDNA FLJ44127 fis, clone THYMU2006420, highly similar to                                                                            |
| 1895                     | B3KWX6           | 9                    | 30             | 43                    | 270    | 30451 | 9.5  | Mortality factor 4-like protein 2                                                                                                                                                                         |
| 1895                     | Q53EY5           | 9                    | 30             | 40.3                  | 288    | 32312 | 9.7  | MORF-related gene X variant (Fragment)                                                                                                                                                                    |
| 1895                     | Q15014           | 9                    | 30             | 40.3                  | 288    | 32308 | 9.7  | Mortality factor 4-like protein 2                                                                                                                                                                         |
| 1896                     | Q00688           | 9                    | 42             | 42.9                  | 224    | 25177 | 9.3  | Peptidyl-prolyl cis-trans isomerase FKBP3                                                                                                                                                                 |
| 1896                     | Q53GD8           | 9                    | 42             | 42.9                  | 224    | 25204 | 9.4  | FK506-binding protein 3 variant (Fragment)                                                                                                                                                                |
| 1897                     | Q5HYL6           | 9                    | 26             | 42.9                  | 352    | 39555 | 5.2  | Putative uncharacterized protein DKFZp686E1899                                                                                                                                                            |
| 1897                     | Q9NYL9           | 9                    | 26             | 42.9                  | 352    | 39595 | 5.2  | Tropomodulin-3                                                                                                                                                                                            |
| 1898                     | P26373           | 9                    | 61             | 42.2                  | 211    | 24261 | 11.7 | 60S ribosomal protein L13                                                                                                                                                                                 |
| 1898                     | Q6NZ55           | 9                    | 61             | 42.2                  | 211    | 24265 | 11.7 | 60S ribosomal protein L13                                                                                                                                                                                 |
| 1899                     | Q96C23           | 9                    | 20             | 41.5                  | 342    | 37766 | 6.7  | Aldose 1-epimerase                                                                                                                                                                                        |
| 1900                     | B9A044           | 9                    | 19             | 41.6                  | 233    | 26816 | 7.9  | Uncharacterized protein                                                                                                                                                                                   |
| 1900                     | B8ZZ50           | 9                    | 19             | 41.1                  | 236    | 27219 | 7.2  | Uncharacterized protein<br>Eukaryotic translation initiation factor 4E member 2 variant (Fragment)                                                                                                        |
| 1900                     | Q59FE1           | 9                    | 19             | 39.9                  | 243    | 27829 | 7.5  | 7.5                                                                                                                                                                                                       |
| 1900                     | Q60573           | 9                    | 19             | 39.6                  | 245    | 28362 | 8.9  | Eukaryotic translation initiation factor 4E type 2                                                                                                                                                        |
| 1901                     | Q95825           | 9                    | 14             | 40.7                  | 349    | 38697 | 5.8  | Quinone oxidoreductase-like protein 1                                                                                                                                                                     |
| 1902                     | Q76071           | 9                    | 17             | 40.4                  | 339    | 37840 | 5    | Probable cytosolic iron-sulfur protein assembly protein CIAO1                                                                                                                                             |
| 1903                     | Q9BUP3           | 9                    | 12             | 40.1                  | 242    | 27049 | 8.4  | Oxidoreductase HTATIP2                                                                                                                                                                                    |
| 1904                     | Q49AR2           | 9                    | 12             | 39.8                  | 442    | 49967 | 4.8  | UPF0489 protein C5orf22                                                                                                                                                                                   |
| 1905                     | Q9UKD2           | 9                    | 18             | 39.7                  | 239    | 27560 | 8.3  | mRNA turnover protein 4 log                                                                                                                                                                               |
| 1906                     | Q76027           | 9                    | 16             | 39.1                  | 345    | 38364 | 5.8  | Annexin A9<br>cDNA FLJ76254, highly similar to sapiens gamma-glutamyl                                                                                                                                     |
| 1907                     | A8K335           | 9                    | 41             | 38.4                  | 318    | 36047 | 7.4  | hydrolase (GGH), mRNA                                                                                                                                                                                     |
| 1907                     | Q92820           | 9                    | 41             | 38.4                  | 318    | 35964 | 7.1  | Gamma-glutamyl hydrolase                                                                                                                                                                                  |
| 1908                     | Q4G0F5           | 9                    | 12             | 37.8                  | 336    | 39155 | 7.3  | Vacuolar protein sorting-associated protein 26B                                                                                                                                                           |
| 1909                     | Q9NPF79          | 9                    | 17             | 36.8                  | 307    | 33879 | 6.3  | Vacuolar protein sorting-associated protein VTA1 log                                                                                                                                                      |
| 1910                     | P36952           | 9                    | 10             | 35.7                  | 375    | 42100 | 6    | Serpin B5<br>cDNA FLJ54796, highly similar to sapiens selenocysteine lyase                                                                                                                                |
| 1911                     | B4DVB4           | 9                    | 14             | 35.6                  | 351    | 38003 | 6.4  | (SCLY), mRNA                                                                                                                                                                                              |
| 1911                     | E7ESG3           | 9                    | 14             | 35.6                  | 351    | 38033 | 6.4  | Uncharacterized protein                                                                                                                                                                                   |
| 1911                     | Q96115           | 9                    | 14             | 28.1                  | 445    | 48149 | 7.1  | Selenocysteine lyase                                                                                                                                                                                      |
| 1912                     | B2RAT6           | 9                    | 15             | 35.4                  | 379    | 43347 | 7    | Galactose-1-phosphate uridylyltransferase                                                                                                                                                                 |
| 1912                     | P07902           | 9                    | 15             | 35.4                  | 379    | 43363 | 7    | Galactose-1-phosphate uridylyltransferase<br>Small glutamine-rich tetratricopeptide repeat-containing protein alpha                                                                                       |
| 1913                     | Q43765           | 9                    | 22             | 35.1                  | 313    | 34063 | 4.9  | 4.9                                                                                                                                                                                                       |
| 1914                     | Q15814           | 9                    | 15             | 35                    | 346    | 39248 | 5.7  | Tubulin-specific chaperone C                                                                                                                                                                              |
| 1915                     | Q2TU34           | 9                    | 17             | 34.9                  | 338    | 36814 | 7    | Fructose-1,6-bisphosphatase 1                                                                                                                                                                             |

Table S1. Proteins identified in the OVCAR-3 tumor supernatant by two or more unique peptides.

| Protein or Protein Group | Accession Number | Unique Peptide Count | Spectrum Count | Sequence Coverage (%) | Length | MolWt | pI   | Descriptive Name                                                                                            |
|--------------------------|------------------|----------------------|----------------|-----------------------|--------|-------|------|-------------------------------------------------------------------------------------------------------------|
| 1916                     | Q53EY9           | 9                    | 12             | 34.7                  | 403    | 44478 | 7    | F-box only protein 22 isoform a variant (Fragment)                                                          |
| 1916                     | Q8NEZ5           | 9                    | 12             | 34.7                  | 403    | 44508 | 7    | F-box only protein 22                                                                                       |
| 1917                     | Q96S82           | 9                    | 16             | 37.4                  | 380    | 40510 | 5.1  | Ubiquitin-like protein 7                                                                                    |
| 1917                     | D3DW56           | 9                    | 16             | 33.8                  | 420    | 45137 | 5.4  | Ubiquitin-like 7 (Bone marrow stromal cell-derived), isoform CRA_a                                          |
| 1918                     | UPI0000D4E5C4    | 9                    | 16             | 38.5                  | 314    | 34684 | 7.2  | Aflatoxin B1 aldehyde reductase member 2 (EC 1...-.) (AFB1-AR 1) (Aldoketoreductase 7).                     |
| 1918                     | O43488           | 9                    | 16             | 33.7                  | 359    | 39589 | 7.2  | Aflatoxin B1 aldehyde reductase member 2                                                                    |
| 1919                     | O95630           | 9                    | 20             | 33.5                  | 424    | 48077 | 6.3  | STAM-binding protein                                                                                        |
| 1920                     | P28289           | 9                    | 16             | 33.4                  | 359    | 40569 | 5.1  | Tropomodulin-1                                                                                              |
| 1921                     | Q96ER3           | 9                    | 24             | 31.9                  | 474    | 53558 | 4.5  | Protein SAAL1                                                                                               |
| 1922                     | P08397           | 9                    | 15             | 30.5                  | 361    | 39330 | 7.2  | Porphyobilinogen deaminase                                                                                  |
| 1923                     | P55036           | 9                    | 22             | 30.5                  | 377    | 40737 | 4.8  | 26S proteasome non-ATPase regulatory subunit 4                                                              |
| 1924                     | Q99816           | 9                    | 20             | 30                    | 390    | 43944 | 6.4  | Tumor susceptibility gene 101 protein                                                                       |
| 1925                     | Q5QPL9           | 9                    | 31             | 36.7                  | 237    | 24665 | 10.5 | RNA binding protein, autoantigenic (HnRNP-associated with lethal yellow log (Mouse)) (Fragment)             |
| 1925                     | A8K4T9           | 9                    | 31             | 29.9                  | 291    | 30398 | 9.5  | cDNA FLJ77421, highly similar to sapiens autoantigen p542 mRNA                                              |
| 1925                     | Q9UKM9           | 9                    | 31             | 28.4                  | 306    | 32463 | 9.2  | RNA-binding protein Raly                                                                                    |
| 1925                     | Q53GL6           | 9                    | 31             | 28.3                  | 307    | 32550 | 9.2  | RNA binding protein (Autoantigenic, hnRNP-associated with lethal yellow) long isoform variant (Fragment)    |
| 1926                     | O94888           | 9                    | 15             | 29.4                  | 489    | 54862 | 5.2  | UBX domain-containing protein 7                                                                             |
| 1927                     | P18754           | 9                    | 13             | 29.9                  | 421    | 44969 | 7.5  | Regulator of chromosome condensation                                                                        |
| 1927                     | E9PAT9           | 9                    | 13             | 28.8                  | 438    | 46753 | 8.1  | Uncharacterized protein                                                                                     |
| 1927                     | Q6NT97           | 9                    | 13             | 27.9                  | 452    | 48146 | 8.2  | Regulator of chromosome condensation 1                                                                      |
| 1928                     | P50613           | 9                    | 13             | 28                    | 346    | 39038 | 8.5  | Cyclin-dependent kinase 7                                                                                   |
| 1929                     | Q13619           | 9                    | 20             | 27.9                  | 759    | 87680 | 8.1  | Cullin-4A                                                                                                   |
| 1930                     | Q9NR46           | 9                    | 11             | 28.1                  | 395    | 43974 | 6    | Endophilin-B2                                                                                               |
| 1930                     | B7ZC38           | 9                    | 11             | 27.8                  | 400    | 44361 | 5.8  | SH3-domain GRB2-like endophilin B2                                                                          |
| 1930                     | Q9NR46-2         | 9                    | 11             | 27.5                  | 404    | 44766 | 5.6  | Isoform 2 of Endophilin-B2                                                                                  |
| 1931                     | Q14790-2         | 9                    | 13             | 28.2                  | 464    | 53769 | 5.2  | Isoform 2 of Caspase-8                                                                                      |
| 1931                     | Q14790           | 9                    | 13             | 27.3                  | 479    | 55391 | 5.1  | Caspase-8                                                                                                   |
| 1931                     | Q14790-4         | 9                    | 13             | 26.4                  | 496    | 57701 | 5.4  | Isoform 4 of Caspase-8                                                                                      |
| 1931                     | UPI0000456ECD    | 9                    | 13             | 24.3                  | 538    | 61836 | 5.3  | caspase-8 isoform G precursor                                                                               |
| 1931                     | Q14790-9         | 9                    | 13             | 24.3                  | 538    | 61864 | 5.3  | Isoform 9 of Caspase-8                                                                                      |
| 1932                     | Q86U75           | 9                    | 13             | 27.3                  | 619    | 67017 | 6    | Dihydropyrimidinase-like 2                                                                                  |
| 1933                     | B3KM43           | 9                    | 16             | 25.1                  | 621    | 68798 | 6.1  | cDNA FLJ10228 fis, clone HEMBB1000119, highly similar to N-acetylserotonin O-methyltransferase-like protein |
| 1933                     | O95671           | 9                    | 16             | 25.1                  | 621    | 68857 | 6.1  | N-acetylserotonin O-methyltransferase-like protein                                                          |
| 1934                     | A8K8C2           | 9                    | 13             | 23.7                  | 527    | 59332 | 6.8  | cDNA FLJ76932, highly similar to sapiens tubulin-specific chaperone e (TBCE), mRNA                          |
| 1934                     | Q15813           | 9                    | 13             | 23.7                  | 527    | 59346 | 6.8  | Tubulin-specific chaperone E                                                                                |
| 1934                     | B7Z3P1           | 9                    | 13             | 21.6                  | 578    | 64852 | 7.3  | cDNA FLJ59210, highly similar to Tubulin-specific chaperone E                                               |
| 1935                     | Q59GY3           | 9                    | 23             | 29                    | 279    | 31865 | 11   | Arginine/serine-rich splicing factor 6 variant (Fragment)                                                   |
| 1935                     | Q13247-3         | 9                    | 23             | 24.2                  | 335    | 38419 | 11   | Isoform SRP55-3 of Serine/arginine-rich splicing factor 6                                                   |
| 1935                     | A8K588           | 9                    | 23             | 23.5                  | 344    | 39488 | 11.4 | cDNA FLJ76823, highly similar to sapiens splicing factor, arginine/serine-rich 6 (SFRS6), mRNA              |
| 1935                     | Q13247           | 9                    | 23             | 23.5                  | 344    | 39587 | 11.4 | Serine/arginine-rich splicing factor 6                                                                      |
| 1936                     | B4DVY1           | 9                    | 34             | 25.9                  | 499    | 58141 | 5.7  | cDNA FLJ51552, highly similar to Eukaryotic translation initiation factor 3 subunit 7                       |
| 1936                     | B4DTF8           | 9                    | 34             | 24.2                  | 533    | 62040 | 5.6  | cDNA FLJ53917, highly similar to Eukaryotic translation initiation factor 3 subunit 7                       |
| 1936                     | A8MW3            | 9                    | 34             | 23.5                  | 548    | 63903 | 6.2  | Uncharacterized protein                                                                                     |
| 1936                     | O15371           | 9                    | 34             | 23.5                  | 548    | 63973 | 6    | Eukaryotic translation initiation factor 3 subunit D                                                        |
| 1937                     | P19474           | 9                    | 12             | 23.2                  | 475    | 54170 | 6.4  | E3 ubiquitin-protein ligase TRIM21                                                                          |
| 1938                     | Q9H074-2         | 9                    | 22             | 27.8                  | 400    | 45631 | 4.5  | Isoform 2 of Polyadenylate-binding protein-interacting protein 1                                            |
| 1938                     | Q9H074           | 9                    | 22             | 23.2                  | 479    | 53525 | 4.8  | Polyadenylate-binding protein-interacting protein 1                                                         |
| 1939                     | Q96NY8           | 9                    | 17             | 21                    | 510    | 55454 | 5.4  | Poliocivirus receptor-related protein 4                                                                     |
| 1940                     | Q9UQB8-5         | 9                    | 23             | 22.1                  | 520    | 57445 | 8.8  | Isoform 5 of Brain-specific angiogenesis inhibitor 1-associated protein 2                                   |
| 1940                     | Q9UQB8-4         | 9                    | 23             | 22.1                  | 521    | 57359 | 8.9  | Isoform 4 of Brain-specific angiogenesis inhibitor 1-associated protein 2                                   |
| 1940                     | Q9UQB8-6         | 9                    | 23             | 22                    | 522    | 57430 | 8.9  | Isoform 6 of Brain-specific angiogenesis inhibitor 1-associated protein 2                                   |
| 1940                     | Q9UQB8-2         | 9                    | 23             | 21.5                  | 534    | 59014 | 9    | Isoform 2 of Brain-specific angiogenesis inhibitor 1-associated protein 2                                   |
| 1940                     | Q9UQB8           | 9                    | 23             | 20.8                  | 552    | 60868 | 8.9  | Brain-specific angiogenesis inhibitor 1-associated protein 2                                                |
| 1941                     | Q9Y2X3           | 9                    | 29             | 19.8                  | 529    | 59578 | 8.9  | Nucleolar protein 58                                                                                        |
| 1942                     | B7Z5E4           | 9                    | 14             | 23.1                  | 445    | 50431 | 8.9  | cDNA FLJ54614, highly similar to Vacuolar protein sorting-associated protein 45                             |
| 1942                     | B7Z360           | 9                    | 14             | 19.3                  | 534    | 61107 | 8.3  | cDNA FLJ54353, highly similar to Vacuolar protein sorting-associated protein 45                             |
| 1942                     | Q9NRW7           | 9                    | 14             | 18.1                  | 570    | 65077 | 8.2  | Vacuolar protein sorting-associated protein 45                                                              |
| 1943                     | Q9BTT9           | 9                    | 15             | 21.1                  | 673    | 76483 | 6.5  | GYS1 protein                                                                                                |
| 1943                     | P13807           | 9                    | 15             | 19.3                  | 737    | 83786 | 6.2  | Glycogen [starch] synthase, muscle                                                                          |
| 1943                     | Q53ERO           | 9                    | 15             | 19.3                  | 737    | 83858 | 6.1  | Glycogen synthase 1 (Muscle) variant (Fragment)                                                             |
| 1944                     | Q0EFC6           | 9                    | 16             | 20.7                  | 545    | 62135 | 9.1  | HSR1 protein                                                                                                |
| 1944                     | E9PBB2           | 9                    | 16             | 20.1                  | 561    | 64258 | 9.5  | Uncharacterized protein                                                                                     |
| 1944                     | B4DYK6           | 9                    | 16             | 18.7                  | 605    | 68256 | 5.5  | cDNA FLJ56887, highly similar to sapiens guanine nucleotide binding protein-like 1 (GNL1), mRNA             |
| 1944                     | P36915           | 9                    | 16             | 18.6                  | 607    | 68661 | 5.8  | Guanine nucleotide-binding protein-like 1                                                                   |
| 1945                     | B4E1E2           | 9                    | 21             | 18.5                  | 661    | 74854 | 8    | cDNA FLJ61530, highly similar to Hepatocyte growth factor-regulated tyrosine kinase substrate               |
| 1945                     | O14964           | 9                    | 21             | 15.7                  | 777    | 86192 | 6.2  | Hepatocyte growth factor-regulated tyrosine kinase substrate                                                |
| 1946                     | O43278-2         | 9                    | 16             | 18.5                  | 513    | 56885 | 6.2  | Isoform 2 of Kunitz-type protease inhibitor 1                                                               |
| 1946                     | O43278           | 9                    | 16             | 18                    | 529    | 58398 | 6.3  | Kunitz-type protease inhibitor 1                                                                            |
| 1947                     | Q9BTE3-2         | 9                    | 10             | 17.2                  | 640    | 72749 | 5.8  | Isoform 2 of Mini-chromosome maintenance complex-binding protein                                            |
| 1947                     | Q9BTE3           | 9                    | 10             | 17.1                  | 642    | 72980 | 5.9  | Mini-chromosome maintenance complex-binding protein                                                         |
| 1948                     | Q5RFA0           | 9                    | 19             | 16.4                  | 590    | 66219 | 5.1  | Negative elongation factor D                                                                                |
| 1948                     | Q8IXH7           | 9                    | 19             | 16.4                  | 590    | 66247 | 5.1  | Negative elongation factor C/D                                                                              |
| 1949                     | P05556           | 9                    | 14             | 16.3                  | 798    | 88415 | 5.4  | Integrin beta-1                                                                                             |
| 1950                     | Q8TE77           | 9                    | 13             | 16.2                  | 659    | 72996 | 5.3  | Protein phosphatase Slingshot log 3                                                                         |
| 1951                     | B2RAU8           | 9                    | 120            | 16                    | 699    | 73604 | 9.4  | cDNA, FLJ95131, highly similar to sapiens nucleolar and coiled-body phosphoprotein 1 (NOLC1), mRNA          |
| 1951                     | Q14978           | 9                    | 120            | 16                    | 699    | 73603 | 9.5  | Nucleolar and coiled-body phosphoprotein 1                                                                  |
| 1951                     | Q14978-2         | 9                    | 120            | 15.8                  | 709    | 74747 | 9.5  | Isoform Beta of Nucleolar and coiled-body phosphoprotein 1                                                  |
| 1952                     | Q96ST2-2         | 9                    | 20             | 22.9                  | 494    | 56109 | 5.4  | Isoform 2 of Protein IWS1 log                                                                               |
| 1952                     | Q96ST2-3         | 9                    | 20             | 18.5                  | 612    | 69108 | 4.9  | Isoform 3 of Protein IWS1 log                                                                               |
| 1952                     | C9J221           | 9                    | 20             | 18.5                  | 612    | 69078 | 4.9  | Uncharacterized protein                                                                                     |
| 1952                     | B4DGM5           | 9                    | 20             | 15.5                  | 729    | 82122 | 4.8  | cDNA FLJ53983, highly similar to IWS1 log                                                                   |
| 1952                     | E7EX51           | 9                    | 20             | 14.7                  | 771    | 86674 | 4.7  | Uncharacterized protein                                                                                     |
| 1952                     | Q96ST2           | 9                    | 20             | 13.8                  | 819    | 91955 | 4.7  | Protein IWS1 log                                                                                            |

Table S1. Proteins identified in the OVCAR-3 tumor supernatant by two or more unique peptides.

| Protein or Group | Accession Number | Unique Peptide Count | Spectrum Count | Sequence Coverage (%) | Length | MolWt  | pI   | Descriptive Name                                                                                    |
|------------------|------------------|----------------------|----------------|-----------------------|--------|--------|------|-----------------------------------------------------------------------------------------------------|
| 1953             | O95834           | 9                    | 10             | 19                    | 649    | 70679  | 6.3  | Echinoderm microtubule-associated protein-like 2                                                    |
| 1953             | B7Z3I2           | 9                    | 10             | 15.5                  | 796    | 86471  | 6.9  | cDNA FLJ59545, highly similar to Echinoderm microtubule-associated protein-like 2                   |
| 1953             | B7Z3Q9           | 9                    | 10             | 15.1                  | 815    | 88589  | 6.9  | cDNA FLJ56452, highly similar to Echinoderm microtubule-associated protein-like 2                   |
| 1954             | Q9BWU0           | 9                    | 19             | 14.9                  | 796    | 88814  | 5.2  | Kanadaplin                                                                                          |
| 1955             | UPI0001DAFE3F    | 9                    | 13             | 14.2                  | 869    | 97977  | 7.5  | dynammin-2 isoform 5                                                                                |
| 1955             | P50570-2         | 9                    | 13             | 14.2                  | 866    | 97652  | 7.6  | Isoform 2 of Dynammin-2                                                                             |
| 1955             | P50570           | 9                    | 13             | 14.1                  | 870    | 98064  | 7.5  | Dynammin-2                                                                                          |
| 1956             | O75146           | 9                    | 11             | 14                    | 1068   | 119388 | 6.7  | Huntingtin-interacting protein 1-related protein                                                    |
| 1957             | O75150-4         | 9                    | 9              | 14.9                  | 901    | 102046 | 6.5  | Isoform 4 of E3 ubiquitin-protein ligase BRE1B                                                      |
| 1957             | A8K6K1           | 9                    | 9              | 13.4                  | 1000   | 113549 | 6.3  | cDNA FLJ78667, highly similar to sapiens ring finger protein 40 (RNF40), transcript variant 1, mRNA |
| 1957             | O75150           | 9                    | 9              | 13.4                  | 1001   | 113650 | 6.2  | E3 ubiquitin-protein ligase BRE1B                                                                   |
| 1958             | Q9Y6K1           | 9                    | 18             | 12.5                  | 912    | 101858 | 6.6  | DNA (cytosine-5)-methyltransferase 3A                                                               |
| 1959             | UPI000023B84F    | 9                    | 10             | 11.4                  | 980    | 110311 | 5.4  | liprin-beta-1 isoform 4                                                                             |
| 1959             | UPI000023B84D    | 9                    | 10             | 11.1                  | 1005   | 113195 | 5.7  | liprin-beta-1 isoform 1                                                                             |
| 1960             | Q96F88           | 9                    | 10             | 10.6                  | 1024   | 114681 | 9.2  | Processing of 1, ribonuclease P/MRP subunit (S. cerevisiae)                                         |
| 1960             | Q99575           | 9                    | 10             | 10.6                  | 1024   | 114709 | 9.2  | Ribonucleases P/MRP protein subunit POP1                                                            |
| 1961             | B7Z6F7           | 9                    | 11             | 10.5                  | 1274   | 141132 | 6.1  | cDNA FLJ61705, highly similar to Symplekin                                                          |
| 1961             | Q92797           | 9                    | 11             | 10.5                  | 1274   | 141148 | 6.1  | Symplekin                                                                                           |
| 1962             | E7EN22           | 9                    | 12             | 10.9                  | 1372   | 150659 | 6.4  | Ubiquitin carboxyl-terminal hydrolase                                                               |
| 1962             | E9PEG8           | 9                    | 12             | 10.5                  | 1419   | 156035 | 6.4  | Uncharacterized protein                                                                             |
| 1962             | B4DGT3           | 9                    | 12             | 10.5                  | 1419   | 156051 | 6.4  | Ubiquitin carboxyl-terminal hydrolase                                                               |
| 1962             | A5PKX8           | 9                    | 12             | 10.3                  | 1447   | 158726 | 7    | Ubiquitin carboxyl-terminal hydrolase (Fragment)                                                    |
| 1962             | A5PL36           | 9                    | 12             | 10.3                  | 1449   | 158974 | 7    | Ubiquitin carboxyl-terminal hydrolase (Fragment)                                                    |
| 1963             | B3KMR5           | 9                    | 13             | 10.3                  | 1297   | 143672 | 8.8  | cDNA FLJ12434 fis, clone NT2RM1000037, highly similar to sapiens KIAA0690 protein                   |
| 1963             | Q5JTH9           | 9                    | 13             | 10.3                  | 1297   | 143702 | 8.8  | RRP12-like protein                                                                                  |
| 1964             | E7EQT4           | 9                    | 16             | 9.6                   | 1094   | 122261 | 5.6  | Uncharacterized protein                                                                             |
| 1964             | B4DQZ7           | 9                    | 16             | 9.6                   | 1096   | 122558 | 5.7  | cDNA FLJ50838, highly similar to Apoptotic chromatin condensation inducer in thenucleus (Fragment)  |
| 1964             | UPI0001B8380A    | 9                    | 16             | 8.1                   | 1301   | 147388 | 6.7  | apoptotic chromatin condensation inducer in the nucleus isoform 3                                   |
| 1964             | B2RTT4           | 9                    | 16             | 7.9                   | 1328   | 150583 | 6.4  | ACIN1 protein                                                                                       |
| 1964             | Q9UKV3           | 9                    | 16             | 7.8                   | 1341   | 151861 | 6.4  | Apoptotic chromatin condensation inducer in the nucleus                                             |
| 1965             | Q5VZ89           | 9                    | 12             | 7.1                   | 1673   | 186856 | 6.9  | DENN domain-containing protein 4C                                                                   |
| 1966             | Q13535-2         | 9                    | 21             | 5.4                   | 2580   | 294217 | 7.4  | Isoform 2 of Serine/threonine-protein kinase ATR                                                    |
| 1966             | Q13535           | 9                    | 21             | 5.3                   | 2644   | 301365 | 7.4  | Serine/threonine-protein kinase ATR                                                                 |
| 1966             | Q13535-3         | 9                    | 21             | 5.3                   | 2610   | 297478 | 7.5  | Isoform 3 of Serine/threonine-protein kinase ATR                                                    |
| 1967             | B7WZN6           | 9                    | 18             | 4.3                   | 2752   | 301570 | 9.1  | Uncharacterized protein                                                                             |
| 1967             | Q9Y520-3         | 9                    | 18             | 4.3                   | 2701   | 295829 | 9    | Isoform 3 of Protein PRR2C                                                                          |
| 1967             | E9PEL0           | 9                    | 18             | 4.3                   | 2702   | 296059 | 9    | Uncharacterized protein                                                                             |
| 1967             | UPI0000E265EC    | 9                    | 18             | 4.2                   | 2817   | 308606 | 9.1  | protein BAT2-like 2                                                                                 |
| 1967             | Q9Y520-6         | 9                    | 18             | 4.2                   | 2753   | 301668 | 9.1  | Isoform 6 of Protein PRR2C                                                                          |
| 1967             | Q9Y520-4         | 9                    | 18             | 4.2                   | 2818   | 308703 | 9.1  | Isoform 4 of Protein PRR2C                                                                          |
| 1967             | E7EPN9           | 9                    | 18             | 4.2                   | 2819   | 308776 | 9.1  | Uncharacterized protein                                                                             |
| 1967             | Q9Y520-5         | 9                    | 18             | 4.1                   | 2850   | 312732 | 9.1  | Isoform 5 of Protein PRR2C                                                                          |
| 1967             | E9PF21           | 9                    | 18             | 4.1                   | 2850   | 312706 | 9.1  | Uncharacterized protein                                                                             |
| 1967             | UPI0001AE797B    | 9                    | 18             | 4                     | 2896   | 316911 | 9.1  | HBxAg transactivated protein 2                                                                      |
| 1967             | Q9Y520-7         | 9                    | 18             | 4                     | 2899   | 317178 | 9.1  | Isoform 7 of Protein PRR2C                                                                          |
| 1967             | Q9Y520           | 9                    | 18             | 4                     | 2897   | 317008 | 9.1  | Protein PRR2C                                                                                       |
| 1967             | E7EX58           | 9                    | 18             | 4                     | 2898   | 317081 | 9.1  | Uncharacterized protein                                                                             |
| 1968             | Q9BYK8           | 9                    | 13             | 4                     | 2649   | 294649 | 7.5  | Peroxisomal proliferator-activated receptor A-interacting complex                                   |
| 1969             | Q9NUJ2           | 9                    | 13             | 2.5                   | 5596   | 632827 | 5.7  | 285 kDa protein                                                                                     |
| 1970             | Q9UPN1           | 8                    | 22             | 75.2                  | 294    | 33774  | 5.3  | Midasin                                                                                             |
| 1970             | P36873           | 8                    | 22             | 68.4                  | 323    | 36984  | 6.5  | Serine/threonine-protein phosphatase (Fragment)                                                     |
| 1970             | Q3U7K1           | 8                    | 22             | 68.4                  | 323    | 37033  | 6.5  | Serine/threonine-protein phosphatase PP1-gamma catalytic subunit                                    |
| 1970             | P63087           | 8                    | 22             | 68.4                  | 323    | 36984  | 6.5  | Serine/threonine-protein phosphatase                                                                |
| 1970             | P63087-2         | 8                    | 22             | 65.6                  | 337    | 38504  | 6.1  | Serine/threonine-protein phosphatase PP1-gamma catalytic subunit                                    |
| 1970             | P36873-2         | 8                    | 22             | 65.6                  | 337    | 38518  | 6.1  | Isoform Gamma-2 of Serine/threonine-protein phosphatase PP1-gamma catalytic subunit                 |
| 1971             | P68036           | 8                    | 222            | 66.9                  | 154    | 17862  | 8.5  | Isoform Gamma-2 of Serine/threonine-protein phosphatase PP1-gamma catalytic subunit                 |
| 1972             | P62330           | 8                    | 43             | 65.7                  | 175    | 20082  | 9    | Ubiquitin-conjugating enzyme E2 L3 Ubiquitin-conjugating enzyme E2 L3                               |
| 1972             | Q5U025           | 8                    | 43             | 65.7                  | 175    | 20211  | 9    | ADP-ribosylation factor 6                                                                           |
| 1973             | P62841           | 8                    | 108            | 64.8                  | 145    | 17040  | 10.4 | ADP-ribosylation factor 6                                                                           |
| 1974             | Q99JZ4           | 8                    | 20             | 64.1                  | 198    | 22399  | 6.7  | 40S ribosomal protein S15 40S ribosomal protein S15                                                 |
| 1974             | Q9NR31           | 8                    | 20             | 64.1                  | 198    | 22367  | 6.7  | SAR1 gene log A (S. cerevisiae)                                                                     |
| 1975             | P45878           | 8                    | 56             | 63.6                  | 140    | 15344  | 8.9  | GTP-binding protein SAR1a                                                                           |
| 1975             | P26885           | 8                    | 56             | 62.7                  | 142    | 15649  | 9.1  | Peptidyl-prolyl cis-trans isomerase FKBP2                                                           |
| 1976             | Q3UGM5           | 8                    | 15             | 62.7                  | 225    | 26002  | 5.8  | Peptidyl-prolyl cis-trans isomerase FKBP2                                                           |
| 1976             | Q9Y3A3           | 8                    | 15             | 62.7                  | 225    | 26032  | 5.8  | Putative uncharacterized protein                                                                    |
| 1977             | P83876           | 8                    | 93             | 62                    | 142    | 16786  | 5.8  | Mps one binder kinase activator-like 3 Mps one binder kinase activator-like 3                       |
| 1978             | P47813           | 8                    | 37             | 61.1                  | 144    | 16460  | 5.2  | Thioredoxin-like protein 4A Thioredoxin-like protein 4A                                             |
| 1979             | E9QKZ3           | 8                    | 142            | 61.4                  | 202    | 22299  | 6.2  | Eukaryotic translation initiation factor 1A, X-chromosomal                                          |
| 1979             | E7ETK2           | 8                    | 142            | 60.5                  | 205    | 22595  | 7.2  | Uncharacterized protein                                                                             |
| 1979             | P62820           | 8                    | 142            | 60.5                  | 205    | 22678  | 6.2  | Uncharacterized protein                                                                             |
| 1980             | UPI0000110661    | 8                    | 22             | 67.5                  | 169    | 19169  | 4.8  | Ras-related protein Rab-1A Ras-related protein Rab-1A                                               |
| 1980             | Q4T3K0           | 8                    | 22             | 67.5                  | 169    | 19129  | 4.8  | SERINE/THREONINE PHOSPHATASE 2B                                                                     |
| 1980             | P63098           | 8                    | 22             | 67.1                  | 170    | 19300  | 4.8  | Chromosome undetermined SCAF10022, whole genome shotgun sequence. (Fragment)                        |
| 1980             | D3YTA9           | 8                    | 22             | 60.3                  | 189    | 21445  | 5    | Calcineurin subunit B type 1 Calcineurin subunit B type 1                                           |
| 1981             | Q3T0M0           | 8                    | 37             | 55.4                  | 186    | 20917  | 7    | Uncharacterized protein                                                                             |
| 1981             | Q9UBQ0-2         | 8                    | 37             | 55.4                  | 186    | 20927  | 7    | Vacuolar protein sorting-associated protein 29                                                      |
| 1982             | Q9H8S9           | 8                    | 74             | 51.9                  | 216    | 25080  | 7    | Isoform 2 of Vacuolar protein sorting-associated protein 29                                         |
| 1983             | Q15286           | 8                    | 60             | 48.3                  | 201    | 23025  | 8.3  | Mps one binder kinase activator-like 1B Mps one binder kinase activator-like 1B                     |
| 1984             | P62851           | 8                    | 131            | 47.2                  | 125    | 13742  | 10.1 | Ras-related protein Rab-35 Ras-related protein Rab-35                                               |
| 1985             | D3Z3R2           | 8                    | 89             | 46.7                  | 184    | 21279  | 10.1 | 40S ribosomal protein S25 40S ribosomal protein S25                                                 |
| 1985             | Q9CPR4           | 8                    | 89             | 46.7                  | 184    | 21423  | 10.2 | Uncharacterized protein                                                                             |
| 1985             | Q3T025           | 8                    | 89             | 46.7                  | 184    | 21397  | 10.2 | 60S ribosomal protein L17                                                                           |
| 1985             | P18621           | 8                    | 89             | 46.7                  | 184    | 21397  | 10.2 | 60S ribosomal protein L17                                                                           |
| 1985             | Q505B1           | 8                    | 89             | 46.5                  | 185    | 21481  | 10.2 | 60S ribosomal protein L17 60S ribosomal protein L17                                                 |
| 1985             | UPI000024FCB4    | 8                    | 89             | 44.6                  | 193    | 22275  | 10.2 | Rpl17 protein (Fragment)                                                                            |
| 1985             | Q80V08           | 8                    | 89             | 44.3                  | 194    | 22434  | 10.3 | UPI000024FCB4 UniRef100 entry                                                                       |
| 1985             | UPI0001E6B60E    | 8                    | 89             | 39.6                  | 217    | 25035  | 9.8  | Rpl17 protein (Fragment)                                                                            |
|                  |                  |                      |                |                       |        |        |      | PREDICTED: 60S ribosomal protein L17-like isoform 2                                                 |



Table S1. Proteins identified in the OVCAR-3 tumor supernatant by two or more unique peptides.

| Protein or Protein Group | Accession Number | Unique Peptide Count | Spectrum Count | Sequence Coverage (%) | Length | MolWt  | pI   | Descriptive Name                                                                                                            |
|--------------------------|------------------|----------------------|----------------|-----------------------|--------|--------|------|-----------------------------------------------------------------------------------------------------------------------------|
| 1985                     | UPI0000D4CB8E    | 8                    | 89             | 37.7                  | 228    | 26373  | 10.1 | RPL17-C1orf32 protein isoform 1                                                                                             |
| 1985                     | UPI0001E6B61E    | 8                    | 89             | 32.2                  | 267    | 30544  | 10   | PREDICTED: 60S ribosomal protein L17-like                                                                                   |
| 1986                     | Q03958           | 8                    | 19             | 45.7                  | 127    | 14455  | 8.9  | Prefoldin subunit 6                                                                                                         |
| 1986                     | O15212           | 8                    | 19             | 45                    | 129    | 14583  | 8.9  | Prefoldin subunit 6                                                                                                         |
| 1987                     | Q9D883           | 8                    | 18             | 40.2                  | 239    | 27815  | 8.8  | Splicing factor U2AF 35 kDa subunit                                                                                         |
| 1987                     | Q01081           | 8                    | 18             | 40                    | 240    | 27872  | 8.8  | Splicing factor U2AF 35 kDa subunit                                                                                         |
| 1988                     | P61964           | 8                    | 16             | 39.5                  | 334    | 36589  | 8.3  | WD repeat-containing protein 5 WD repeat-containing protein 5                                                               |
| 1988                     | Q3UNQ3           | 8                    | 16             | 39.5                  | 334    | 36574  | 8.3  | Putative uncharacterized protein                                                                                            |
| 1989                     | P84098           | 8                    | 61             | 31.6                  | 196    | 23466  | 11.5 | 60S ribosomal protein L19 60S ribosomal protein L19                                                                         |
| 1990                     | Q99KV1           | 8                    | 12             | 28.2                  | 358    | 40555  | 6.3  | DnaJ log subfamily B member 11                                                                                              |
| 1990                     | QUBS4            | 8                    | 12             | 28.2                  | 358    | 40514  | 6.2  | DnaJ log subfamily B member 11                                                                                              |
|                          |                  |                      |                |                       |        |        |      | Isoform 3 of Cleavage and polyadenylation specificity factor subunit 6                                                      |
| 1991                     | Q16630-3         | 8                    | 67             | 22.6                  | 478    | 52326  | 6.4  | Subunit 6                                                                                                                   |
| 1991                     | C9JGC2           | 8                    | 67             | 22.5                  | 479    | 52357  | 6.4  | Uncharacterized protein                                                                                                     |
| 1991                     | Q6NVF9           | 8                    | 67             | 19.6                  | 551    | 59153  | 7.2  | Cleavage and polyadenylation specificity factor subunit 6                                                                   |
| 1991                     | Q16630           | 8                    | 67             | 19.6                  | 551    | 59210  | 7.2  | Cleavage and polyadenylation specificity factor subunit 6                                                                   |
|                          |                  |                      |                |                       |        |        |      | Isoform 2 of Cleavage and polyadenylation specificity factor subunit 6                                                      |
| 1991                     | Q16630-2         | 8                    | 67             | 18.4                  | 588    | 63471  | 7.7  | Subunit 6                                                                                                                   |
| 1992                     | Q66K91           | 8                    | 100            | 26                    | 231    | 23656  | 10.9 | Small nuclear ribonucleoprotein polypeptides B and B1                                                                       |
| 1992                     | Q5XPV6           | 8                    | 100            | 26                    | 231    | 23657  | 10.7 | Small nuclear ribonucleoprotein polypeptide B                                                                               |
| 1992                     | P27048           | 8                    | 100            | 26                    | 231    | 23656  | 10.9 | Small nuclear ribonucleoprotein-associated protein B                                                                        |
|                          |                  |                      |                |                       |        |        |      | Small nuclear ribonucleoprotein polypeptides B and B1, isoform CRA_c                                                        |
| 1992                     | B4DVS0           | 8                    | 100            | 25.6                  | 234    | 24088  | 10.8 | Small nuclear ribonucleoprotein-associated protein N Small nuclear ribonucleoprotein-associated protein N                   |
| 1992                     | P63162           | 8                    | 100            | 25                    | 240    | 24614  | 11.2 | Small nuclear ribonucleoprotein-associated protein N                                                                        |
| 1992                     | P14678           | 8                    | 100            | 25                    | 240    | 24610  | 11.2 | Small nuclear ribonucleoprotein-associated proteins B and B'                                                                |
| 1992                     | E7ERB2           | 8                    | 100            | 24.8                  | 242    | 27210  | 9.4  | Uncharacterized protein                                                                                                     |
| 1992                     | Q9UIS4           | 8                    | 100            | 24.7                  | 243    | 27267  | 9.4  | Small nuclear ribonucleoprotein B'                                                                                          |
|                          |                  |                      |                |                       |        |        |      | cDNA FLJ41124 fis, clone BRACE2014850, highly similar to Small nuclear ribonucleoprotein-associated protein N               |
| 1992                     | B3KVR1           | 8                    | 100            | 24.6                  | 244    | 25076  | 11   | Small nuclear ribonucleoprotein-associated protein N                                                                        |
| 1992                     | Q15182           | 8                    | 100            | 21.1                  | 285    | 29671  | 10.1 | SNRPB protein                                                                                                               |
| 1992                     | A8MT02           | 8                    | 100            | 20.9                  | 287    | 29871  | 10.5 | Uncharacterized protein                                                                                                     |
| 1992                     | E7ENP4           | 8                    | 100            | 20.9                  | 287    | 29862  | 10.2 | Uncharacterized protein                                                                                                     |
|                          |                  |                      |                |                       |        |        |      | Isoform SM-B1 of Small nuclear ribonucleoprotein-associated proteins B and B'                                               |
| 1992                     | P14678-3         | 8                    | 100            | 20.8                  | 289    | 30032  | 10.2 | Fusion (Involved in t(12;16) in malignant liposarcoma) isoform a variant (Fragment)                                         |
| 1993                     | Q59H57           | 8                    | 193            | 36                    | 300    | 31994  | 9.5  | cDNA FLJ58049, highly similar to RNA-binding protein FUS                                                                    |
| 1993                     | B4DR70           | 8                    | 193            | 25.2                  | 429    | 44812  | 9    | Fusion, derived from t(12;16) malignant liposarcoma (Human)                                                                 |
| 1993                     | Q8CFQ9           | 8                    | 193            | 20.9                  | 517    | 52602  | 9.4  | Putative uncharacterized protein                                                                                            |
| 1993                     | Q3USY4           | 8                    | 193            | 20.8                  | 518    | 52630  | 9.3  | RNA-binding protein FUS                                                                                                     |
| 1993                     | P56959           | 8                    | 193            | 20.8                  | 518    | 52673  | 9.4  | RNA-binding protein FUS                                                                                                     |
| 1993                     | UPI000040A0A0    | 8                    | 193            | 20.7                  | 522    | 53198  | 9.4  | RNA-binding protein FUS isoform 3                                                                                           |
|                          |                  |                      |                |                       |        |        |      | cDNA FLJ78268, highly similar to sapiens fusion (involved in t(12;16) in malignant liposarcoma), transcript variant 1, mRNA |
| 1993                     | A8K4H1           | 8                    | 193            | 20.6                  | 525    | 53411  | 9.4  | Isoform Short of RNA-binding protein FUS                                                                                    |
| 1993                     | P35637-2         | 8                    | 193            | 20.6                  | 525    | 53355  | 9.4  | Uncharacterized protein                                                                                                     |
| 1993                     | E7EUX0           | 8                    | 193            | 20.6                  | 524    | 53312  | 9.4  | Fusion (Involved in t(12;16) in malignant liposarcoma)                                                                      |
| 1993                     | Q8TBR3           | 8                    | 193            | 20.5                  | 526    | 53400  | 9.4  | Fus-like protein (Fragment)                                                                                                 |
| 1993                     | Q13344           | 8                    | 193            | 20.5                  | 528    | 53377  | 9.4  | RNA-binding protein FUS                                                                                                     |
| 1993                     | P35637           | 8                    | 193            | 20.5                  | 526    | 53426  | 9.4  | Cleavage stimulation factor subunit 3                                                                                       |
| 1994                     | Q12996           | 8                    | 24             | 20.4                  | 717    | 82922  | 8.1  | Cleavage stimulation factor subunit 3                                                                                       |
| 1994                     | Q99L17           | 8                    | 24             | 20.4                  | 717    | 82877  | 8.1  | Putative uncharacterized protein (Fragment)                                                                                 |
| 1994                     | Q3TXN6           | 8                    | 24             | 20.4                  | 715    | 82582  | 8.2  |                                                                                                                             |
| 1995                     | Q7M6Y3-2         | 8                    | 43             | 20.6                  | 597    | 64648  | 9    | Isoform 2 of Phosphatidylinositol-binding clathrin assembly protein                                                         |
| 1995                     | Q7M6Y3-3         | 8                    | 43             | 20.3                  | 605    | 65623  | 9    | Isoform 3 of Phosphatidylinositol-binding clathrin assembly protein                                                         |
| 1995                     | Q7M6Y3-4         | 8                    | 43             | 20.2                  | 610    | 66184  | 8.8  | Isoform 4 of Phosphatidylinositol-binding clathrin assembly protein                                                         |
| 1995                     | Q13492-3         | 8                    | 43             | 20.2                  | 610    | 66393  | 8.8  | Isoform 3 of Phosphatidylinositol-binding clathrin assembly protein                                                         |
| 1995                     | B5BU72           | 8                    | 43             | 20.2                  | 610    | 66394  | 8.7  | Phosphatidylinositol-binding clathrin assembly protein isoform 2                                                            |
| 1995                     | Q13492-2         | 8                    | 43             | 19.5                  | 632    | 68764  | 7.9  | Isoform 2 of Phosphatidylinositol-binding clathrin assembly protein                                                         |
| 1995                     | UPI00016395DD    | 8                    | 43             | 19.1                  | 645    | 70037  | 8.2  | UPI00016395DD UniRef100 entry                                                                                               |
|                          |                  |                      |                |                       |        |        |      | cDNA FLJ75056, highly similar to sapiens phosphatidylinositol binding clathrin assembly protein (PICALM), mRNA              |
| 1995                     | A8K5U9           | 8                    | 43             | 18.9                  | 652    | 70756  | 7.6  | Isoform 6 of Phosphatidylinositol-binding clathrin assembly protein                                                         |
| 1995                     | Q7M6Y3-6         | 8                    | 43             | 18.9                  | 652    | 70568  | 7.9  | Phosphatidylinositol-binding clathrin assembly protein                                                                      |
| 1995                     | Q13492           | 8                    | 43             | 18.6                  | 660    | 71543  | 7.9  | Phosphatidylinositol-binding clathrin assembly protein                                                                      |
| 1995                     | A8MX97           | 8                    | 43             | 18.6                  | 660    | 71739  | 8.2  | Uncharacterized protein                                                                                                     |
| 1995                     | Q570Z8           | 8                    | 43             | 18.2                  | 674    | 72927  | 9    | MKIAA4114 protein (Fragment)                                                                                                |
| 1995                     | Q4LE54           | 8                    | 43             | 17.1                  | 721    | 77397  | 8.4  | PICALM variant protein (Fragment)                                                                                           |
| 1996                     | Q9Z1K5           | 8                    | 12             | 17.7                  | 555    | 64017  | 5.1  | Protein ariadne-1 log                                                                                                       |
| 1996                     | Q9Y4X5           | 8                    | 12             | 17.6                  | 557    | 64118  | 5.1  | Protein ariadne-1 log                                                                                                       |
| 1997                     | Q9NQC3           | 8                    | 10             | 15.1                  | 736    | 79748  | 5.4  | Gephyrin                                                                                                                    |
| 1997                     | E9QKJ1           | 8                    | 10             | 14.4                  | 769    | 83282  | 5.6  | Uncharacterized protein                                                                                                     |
| 1998                     | A2AT37           | 8                    | 10             | 7.6                   | 1269   | 147552 | 5.6  | UPF2 regulator of nonsense transcripts log (Yeast)                                                                          |
| 1998                     | Q9HAU5           | 8                    | 10             | 7.6                   | 1272   | 147810 | 5.7  | Regulator of nonsense transcripts 2                                                                                         |
| 1999                     | Q8CGF7-2         | 8                    | 13             | 7.4                   | 1079   | 121577 | 8.5  | Isoform 2 of Transcription elongation regulator 1                                                                           |
| 1999                     | O14776-2         | 8                    | 13             | 7.4                   | 1077   | 121690 | 8.5  | Isoform 2 of Transcription elongation regulator 1                                                                           |
| 1999                     | O14776           | 8                    | 13             | 7.3                   | 1098   | 123901 | 8.6  | Transcription elongation regulator 1                                                                                        |
| 1999                     | Q8CGF7           | 8                    | 13             | 7.3                   | 1100   | 123788 | 8.6  | Transcription elongation regulator 1                                                                                        |
| 2000                     | B7Z6H4           | 8                    | 8              | 6.6                   | 1369   | 153509 | 8.5  | DNA-directed RNA polymerase                                                                                                 |
| 2000                     | B2RXC6           | 8                    | 8              | 6.5                   | 1390   | 155737 | 8.5  | DNA-directed RNA polymerase                                                                                                 |
| 2000                     | O14802           | 8                    | 8              | 6.5                   | 1390   | 155641 | 8.5  | DNA-directed RNA polymerase III subunit RPC1                                                                                |
| 2001                     | Q5T321           | 8                    | 23             | 2.8                   | 2943   | 327548 | 6.2  | Neurobeachin                                                                                                                |
|                          |                  |                      |                |                       |        |        |      | Protein neurobeachin (Lysosomal-trafficking regulator 2) (Protein BCL8B).                                                   |
| 2001                     | UPI00004566E0    | 8                    | 23             | 2.8                   | 2946   | 327863 | 6.2  | Isoform 4 of Neurobeachin                                                                                                   |
| 2001                     | Q9EPN1-4         | 8                    | 23             | 2.8                   | 2931   | 326153 | 6.2  | Isoform 3 of Neurobeachin                                                                                                   |
| 2001                     | Q9EPN1-3         | 8                    | 23             | 2.8                   | 2904   | 323201 | 6.2  | Neurobeachin                                                                                                                |
| 2001                     | Q9EPN1           | 8                    | 23             | 2.8                   | 2936   | 326742 | 6.2  | Neurobeachin                                                                                                                |
| 2001                     | Q8NFP9           | 8                    | 23             | 2.8                   | 2946   | 327821 | 6.2  | Neurobeachin                                                                                                                |
| 2002                     | P14069           | 8                    | 116            | 91                    | 89     | 10051  | 5.5  | Protein S100-A6                                                                                                             |
| 2003                     | P99027           | 8                    | 28             | 85.2                  | 115    | 11651  | 4.5  | 60S acidic ribosomal protein P2                                                                                             |
| 2004                     | P62774           | 8                    | 32             | 72.9                  | 118    | 12861  | 5.5  | Myotrophin                                                                                                                  |
| 2005                     | Q3TIH9           | 8                    | 82             | 66.9                  | 154    | 17863  | 8.2  | Ubiquitin carrier protein                                                                                                   |
| 2006                     | Q70251           | 8                    | 48             | 63.1                  | 225    | 24694  | 4.7  | Elongation factor 1-beta                                                                                                    |
| 2007                     | P13832           | 8                    | 51             | 62.2                  | 172    | 19895  | 4.8  | Myosin regulatory light chain RLC-A                                                                                         |
| 2008                     | Q9D2M8           | 8                    | 190            | 61.4                  | 145    | 16367  | 8    | Ubiquitin-conjugating enzyme E2 variant 2                                                                                   |
| 2009                     | A7VJ98           | 8                    | 19             | 56.3                  | 142    | 16722  | 5.4  | Glia maturation factor beta                                                                                                 |
| 2009                     | Q9CQI3           | 8                    | 19             | 56.3                  | 142    | 16723  | 5.2  | Glia maturation factor beta                                                                                                 |
| 2009                     | Q80X87           | 8                    | 19             | 55.9                  | 143    | 16824  | 5.2  | Glia maturation factor, beta                                                                                                |

Table S1. Proteins identified in the OVCAR-3 tumor supernatant by two or more unique peptides.

| Protein or Group | Accession Number | Unique Peptide Count | Spectrum Count | Sequence Coverage (%) | Length | MolWt | pI   | Descriptive Name                                                           |
|------------------|------------------|----------------------|----------------|-----------------------|--------|-------|------|----------------------------------------------------------------------------|
| 2010             | P22935           | 8                    | 626            | 55.8                  | 138    | 15746 | 5.7  | Cellular retinoic acid-binding protein 2                                   |
| 2011             | P08228           | 8                    | 18             | 55.2                  | 154    | 15943 | 6.5  | Superoxide dismutase [Cu-Zn]                                               |
| 2012             | P11352           | 8                    | 23             | 51.7                  | 201    | 22179 | 7.2  | Glutathione peroxidase 1                                                   |
| 2012             | Q5RJH8           | 8                    | 23             | 51.7                  | 201    | 22292 | 7.2  | Glutathione peroxidase                                                     |
| 2013             | Q3TF08           | 8                    | 21             | 71.8                  | 174    | 20201 | 6    | Putative uncharacterized protein (Fragment)                                |
| 2013             | Q00724           | 8                    | 21             | 62.2                  | 201    | 23206 | 6    | Retinol-binding protein 4                                                  |
| 2013             | E9QQ51           | 8                    | 21             | 51                    | 245    | 28405 | 8    | Uncharacterized protein                                                    |
| 2014             | Q9D0B6           | 8                    | 21             | 49.5                  | 198    | 22223 | 4.5  | UPF0368 protein Cxor126 homolog                                            |
| 2015             | Q7TMS6           | 8                    | 12             | 48.8                  | 209    | 23662 | 7.4  | Glycolipid transfer protein                                                |
| 2015             | Q9JL62           | 8                    | 12             | 48.8                  | 209    | 23690 | 7.4  | Glycolipid transfer protein                                                |
| 2016             | Q8VHN8           | 8                    | 18             | 48.8                  | 211    | 23414 | 9.3  | Protein syndesmos                                                          |
| 2016             | Q8VHN8-2         | 8                    | 18             | 43.5                  | 237    | 26459 | 9.6  | Isoform 2 of Protein syndesmos                                             |
| 2017             | P99026           | 8                    | 27             | 48.5                  | 264    | 29116 | 5.7  | Proteasome subunit beta type-4                                             |
| 2018             | Q9CPU0           | 8                    | 72             | 47.3                  | 184    | 20810 | 5.5  | Lactoylglutathione lyase                                                   |
| 2019             | P22599           | 8                    | 71             | 47.2                  | 413    | 45975 | 5.5  | Alpha-1-antitrypsin 1-2                                                    |
| 2020             | P62748           | 8                    | 13             | 47.2                  | 193    | 22338 | 5.5  | Hippocalcin-like protein 1                                                 |
| 2021             | Q63829           | 8                    | 10             | 47.2                  | 195    | 22037 | 5.6  | COMM domain-containing protein 3                                           |
| 2022             | Q80UW8           | 8                    | 20             | 46.7                  | 210    | 24570 | 6    | DNA-directed RNA polymerases I, II, and III subunit RPABC1                 |
| 2023             | Q6P069-2         | 8                    | 16             | 50.3                  | 183    | 20296 | 5.3  | Isoform 2 of Sorcin                                                        |
| 2023             | Q6P069           | 8                    | 16             | 46.5                  | 198    | 21627 | 5.6  | Sorcin                                                                     |
| 2024             | P63073           | 8                    | 19             | 45.2                  | 217    | 25053 | 6.1  | Eukaryotic translation initiation factor 4E                                |
| 2025             | Q8K3C3           | 8                    | 22             | 44.7                  | 190    | 21537 | 5    | Protein LZIC                                                               |
| 2026             | Q9CR09           | 8                    | 13             | 44.3                  | 167    | 19481 | 7.4  | Ubiquitin-fold modifier-conjugating enzyme 1                               |
| 2027             | Q9D859           | 8                    | 46             | 43.8                  | 192    | 21464 | 8.5  | Putative uncharacterized protein                                           |
| 2028             | D3YX50           | 8                    | 29             | 43.1                  | 160    | 18609 | 10.4 | MCG4465                                                                    |
| 2028             | UPI0000D668F8    | 8                    | 29             | 43.1                  | 160    | 18570 | 10.5 | PREDICTED: 60S ribosomal protein L21-like                                  |
| 2028             | UPI000002570F    | 8                    | 29             | 43.1                  | 160    | 18606 | 10.5 | PREDICTED: 60S ribosomal protein L21-like                                  |
| 2028             | Q9CQM8           | 8                    | 29             | 43.1                  | 160    | 18579 | 10.5 | MCG120646                                                                  |
| 2029             | P35980           | 8                    | 20             | 41.5                  | 188    | 21645 | 11.8 | 60S ribosomal protein L18                                                  |
| 2029             | Q642K1           | 8                    | 20             | 41.5                  | 188    | 21644 | 11.8 | Ribosomal protein L18                                                      |
| 2030             | P29699           | 8                    | 153            | 41.4                  | 345    | 37326 | 6.5  | Alpha-2-HS-glycoprotein                                                    |
| 2030             | Q3UEK5           | 8                    | 153            | 41.4                  | 345    | 37280 | 6.5  | Putative uncharacterized protein                                           |
| 2030             | Q3TIL3           | 8                    | 153            | 41.4                  | 345    | 37298 | 6.4  | Putative uncharacterized protein                                           |
| 2031             | Q3THC1           | 8                    | 18             | 40.5                  | 222    | 24692 | 6.4  | Proteasome (Prosome, macropain) 26S subunit, non-ATPase, 9                 |
| 2031             | Q9CR00           | 8                    | 18             | 40.5                  | 222    | 24720 | 6.4  | 26S proteasome non-ATPase regulatory subunit 9                             |
| 2032             | P45377           | 8                    | 19             | 40.2                  | 316    | 36121 | 6.4  | Aldose reductase-related protein 2                                         |
| 2033             | P58389           | 8                    | 31             | 39.9                  | 323    | 36710 | 6.4  | Serine/threonine-protein phosphatase 2A activator                          |
| 2034             | P48774           | 8                    | 13             | 39.7                  | 224    | 26635 | 7.2  | Glutathione S-transferase Mu 5                                             |
| 2035             | Q64012-2         | 8                    | 18             | 40.5                  | 296    | 31169 | 9.4  | Isoform 1 of RNA-binding protein Raly                                      |
| 2035             | Q64012           | 8                    | 18             | 38.5                  | 312    | 33158 | 8.8  | RNA-binding protein Raly                                                   |
| 2036             | Q9CY64           | 8                    | 11             | 38                    | 295    | 33525 | 7    | Biliverdin reductase A                                                     |
| 2037             | Q08093           | 8                    | 43             | 37.4                  | 305    | 33156 | 7.6  | Calponin-2                                                                 |
| 2038             | P47963           | 8                    | 31             | 37                    | 211    | 24305 | 11.5 | 60S ribosomal protein L13                                                  |
| 2038             | UPI000024F513    | 8                    | 31             | 37                    | 211    | 24252 | 11.5 | PREDICTED: 60S ribosomal protein L13-like                                  |
| 2039             | P21550           | 8                    | 125            | 36.9                  | 434    | 47025 | 7.2  | Beta-enolase                                                               |
| 2039             | Q4FK59           | 8                    | 125            | 36.9                  | 434    | 46998 | 6.7  | Enolase                                                                    |
| 2040             | P10605           | 8                    | 43             | 36                    | 339    | 37280 | 5.9  | Cathepsin B                                                                |
| 2040             | Q3TVS6           | 8                    | 43             | 36                    | 339    | 37320 | 6    | Putative uncharacterized protein                                           |
| 2041             | P28063           | 8                    | 16             | 35.9                  | 276    | 30260 | 6.7  | Proteasome subunit beta type-8                                             |
| 2042             | UPI0001F7935A    | 8                    | 19             | 36                    | 278    | 30770 | 5.3  | UPI0001F7935A UniRef100 entry                                              |
| 2042             | Q8BVQ0           | 8                    | 19             | 35.8                  | 279    | 30929 | 5.3  | Putative uncharacterized protein                                           |
| 2042             | Q9ERF3           | 8                    | 19             | 32.8                  | 305    | 33773 | 5.4  | WD repeat-containing protein 61                                            |
| 2043             | Q3V471           | 8                    | 69             | 50.5                  | 186    | 19938 | 9.5  | Putative uncharacterized protein (Fragment)                                |
| 2043             | P16110           | 8                    | 69             | 35.6                  | 264    | 27515 | 8.4  | Galectin-3                                                                 |
| 2043             | Q8C253           | 8                    | 69             | 35.6                  | 264    | 27415 | 8.5  | Lectin, galactose binding, soluble 3                                       |
| 2044             | Q62000           | 8                    | 21             | 34.9                  | 298    | 34012 | 5.7  | Mimecan                                                                    |
| 2045             | Q64726           | 8                    | 12             | 34.9                  | 307    | 35256 | 6.2  | Zinc-alpha-2-glycoprotein                                                  |
| 2045             | Q9DBB7           | 8                    | 12             | 34.9                  | 307    | 35332 | 6.2  | Zinc-alpha-2-glycoprotein 1                                                |
| 2046             | Q3TXD3           | 8                    | 17             | 31.5                  | 406    | 43125 | 6.4  | Putative uncharacterized protein                                           |
| 2046             | Q62465           | 8                    | 17             | 31.5                  | 406    | 43097 | 6.4  | Synaptic vesicle membrane protein VAT-1 homolog                            |
| 2047             | Q9CR26           | 8                    | 14             | 28.8                  | 309    | 33913 | 6.1  | Vacuolar protein sorting-associated protein VTA1 homolog                   |
| 2048             | Q3UAZ7           | 8                    | 33             | 33.1                  | 181    | 20534 | 9.8  | Putative uncharacterized protein (Fragment)                                |
| 2048             | Q9CT19           | 8                    | 33             | 31.4                  | 191    | 21736 | 9.9  | Putative uncharacterized protein (Fragment)                                |
| 2048             | P30681           | 8                    | 33             | 28.6                  | 210    | 24162 | 7.3  | High mobility group protein B2                                             |
| 2048             | Q3U566           | 8                    | 33             | 28.6                  | 210    | 24176 | 7.3  | MCG4647                                                                    |
| 2049             | Q35744           | 8                    | 11             | 27.9                  | 398    | 44458 | 5.7  | Chitinase-3-like protein 3                                                 |
| 2049             | Q3UV87           | 8                    | 11             | 27.9                  | 398    | 44468 | 5.7  | Putative uncharacterized protein                                           |
| 2050             | Q9D020-1         | 8                    | 11             | 30                    | 297    | 33790 | 5.7  | Isoform 1 of Cytosolic 5'-nucleotidase 3                                   |
| 2050             | Q9D020           | 8                    | 11             | 26.9                  | 331    | 37252 | 6.7  | Cytosolic 5'-nucleotidase 3                                                |
| 2051             | Q62418-3         | 8                    | 34             | 27.1                  | 432    | 48341 | 4.9  | Isoform 3 of Drebrin-like protein                                          |
| 2051             | Q62418-2         | 8                    | 34             | 27                    | 433    | 48428 | 4.9  | Isoform 2 of Drebrin-like protein                                          |
| 2051             | Q62418           | 8                    | 34             | 26.8                  | 436    | 48700 | 4.9  | Drebrin-like protein                                                       |
| 2052             | Q3UM23           | 8                    | 8              | 25.9                  | 456    | 49844 | 4.8  | Putative uncharacterized protein                                           |
| 2052             | Q91V17           | 8                    | 8              | 25.9                  | 456    | 49817 | 4.8  | Ribonuclease inhibitor                                                     |
| 2053             | UPI0001F7968F    | 8                    | 14             | 26.6                  | 482    | 52394 | 8.8  | UPI0001F7968F UniRef100 entry                                              |
| 2053             | Q3UAS7           | 8                    | 14             | 26.6                  | 482    | 51844 | 7.5  | Putative uncharacterized protein (Fragment)                                |
| 2053             | Q3TXK9           | 8                    | 14             | 26.5                  | 483    | 52566 | 8.6  | Putative uncharacterized protein (Fragment)                                |
| 2053             | P47791           | 8                    | 14             | 25.6                  | 500    | 53663 | 8    | Glutathione reductase, mitochondrial                                       |
| 2054             | Q61239           | 8                    | 14             | 23.6                  | 377    | 44013 | 4.9  | Protein farnesyltransferase/geranylgeranyltransferase type-1 subunit alpha |
| 2055             | Q7TNV0           | 8                    | 11             | 22.6                  | 380    | 43159 | 6.9  | Protein DEK                                                                |
| 2056             | Q3U0C4           | 8                    | 17             | 20.3                  | 454    | 50941 | 5.6  | Putative uncharacterized protein                                           |
| 2056             | Q9R111           | 8                    | 17             | 20.3                  | 454    | 51013 | 5.5  | Guanine deaminase                                                          |
| 2057             | Q6A028           | 8                    | 22             | 17.8                  | 585    | 68996 | 6    | Switch-associated protein 70                                               |
| 2058             | Q9JMH6-2         | 8                    | 14             | 21.8                  | 499    | 54394 | 6.3  | Isoform 2 of Thioredoxin reductase 1, cytoplasmic                          |
| 2058             | Q9JMH6           | 8                    | 14             | 17.8                  | 613    | 66934 | 7.4  | Thioredoxin reductase 1, cytoplasmic                                       |
| 2059             | Q08481-2         | 8                    | 11             | 18.1                  | 697    | 77917 | 6.7  | Isoform 2 of Platelet endothelial cell adhesion molecule                   |
| 2059             | Q08481-3         | 8                    | 11             | 17.6                  | 716    | 80004 | 6.9  | Isoform 3 of Platelet endothelial cell adhesion molecule                   |
| 2059             | Q08481           | 8                    | 11             | 17.3                  | 727    | 81263 | 6.7  | Platelet endothelial cell adhesion molecule                                |
| 2059             | B1ARB3           | 8                    | 11             | 17.2                  | 732    | 81917 | 6.9  | Platelet/endothelial cell adhesion molecule 1                              |
| 2059             | Q8CAW4           | 8                    | 11             | 17.2                  | 732    | 81987 | 7    | Putative uncharacterized protein                                           |
| 2060             | Q7TSV4           | 8                    | 20             | 16.6                  | 620    | 68748 | 6.1  | Phosphoglucomutase-2                                                       |
| 2061             | Q3TCJ7           | 8                    | 13             | 16.3                  | 620    | 71764 | 7.2  | Putative uncharacterized protein                                           |
| 2061             | Q60710           | 8                    | 13             | 16.1                  | 627    | 72650 | 8    | SAM domain and HD domain-containing protein 1                              |
| 2061             | UPI0001DD34BC    | 8                    | 13             | 16                    | 631    | 72860 | 7.3  | UPI0001DD34BC UniRef100 entry                                              |
| 2061             | E9Q0K6           | 8                    | 13             | 15.5                  | 651    | 74935 | 7.3  | Uncharacterized protein                                                    |
| 2062             | Q3UAS4           | 8                    | 38             | 14.3                  | 545    | 59977 | 5.2  | Putative uncharacterized protein                                           |
| 2062             | Q3UE29           | 8                    | 38             | 14.2                  | 551    | 60584 | 5.3  | Putative uncharacterized protein                                           |
| 2062             | E9PZ00           | 8                    | 38             | 14.2                  | 551    | 60672 | 5.2  | Uncharacterized protein                                                    |
| 2062             | Q8BFQ1           | 8                    | 38             | 14.1                  | 554    | 61051 | 5.2  | Prosaposin, isoform CRA_a                                                  |
| 2062             | Q3U8C4           | 8                    | 38             | 14.1                  | 554    | 61023 | 5.2  | Putative uncharacterized protein                                           |
| 2062             | Q3U897           | 8                    | 38             | 14.1                  | 554    | 61027 | 5.3  | Putative uncharacterized protein                                           |
| 2062             | Q3U825           | 8                    | 38             | 14.1                  | 554    | 61085 | 5.2  | Putative uncharacterized protein                                           |
| 2062             | Q3U5W2           | 8                    | 38             | 14.1                  | 554    | 61066 | 5.2  | Putative uncharacterized protein                                           |

Table S1. Proteins identified in the OVCAR-3 tumor supernatant by two or more unique peptides.

| Protein or Protein Group | Accession Number | Unique Peptide Count | Spectrum Count | Sequence Coverage (%) | Length | MolWt  | pI   | Descriptive Name                                                                                                                                    |
|--------------------------|------------------|----------------------|----------------|-----------------------|--------|--------|------|-----------------------------------------------------------------------------------------------------------------------------------------------------|
| 2062                     | Q3TXP9           | 8                    | 38             | 14.1                  | 554    | 61067  | 5.2  | Putative uncharacterized protein                                                                                                                    |
| 2062                     | Q3TXJ0           | 8                    | 38             | 14.1                  | 553    | 60923  | 5.2  | Putative uncharacterized protein                                                                                                                    |
| 2062                     | Q3TWL8           | 8                    | 38             | 14.1                  | 554    | 61009  | 5.2  | Putative uncharacterized protein                                                                                                                    |
| 2062                     | Q3TWE9           | 8                    | 38             | 14.1                  | 554    | 61035  | 5.3  | Putative uncharacterized protein                                                                                                                    |
| 2062                     | Q3TKK3           | 8                    | 38             | 14.1                  | 554    | 61053  | 5.3  | Putative uncharacterized protein                                                                                                                    |
| 2062                     | Q3TKB2           | 8                    | 38             | 14.1                  | 554    | 61065  | 5.3  | Putative uncharacterized protein                                                                                                                    |
| 2062                     | Q3TIT5           | 8                    | 38             | 14.1                  | 554    | 61024  | 5.2  | Putative uncharacterized protein                                                                                                                    |
| 2062                     | B2RUD7           | 8                    | 38             | 14                    | 556    | 61294  | 5.2  | Psap protein                                                                                                                                        |
| 2062                     | Q61207           | 8                    | 38             | 14                    | 557    | 61422  | 5.2  | Sulfated glycoprotein 1                                                                                                                             |
| 2063                     | E9Q661           | 8                    | 10             | 12                    | 1067   | 119339 | 7.3  | Uncharacterized protein                                                                                                                             |
| 2063                     | E9PVR1           | 8                    | 10             | 10                    | 1285   | 142337 | 6    | Uncharacterized protein                                                                                                                             |
| 2063                     | Q80X82           | 8                    | 10             | 10                    | 1284   | 142283 | 6.1  | Symplekin                                                                                                                                           |
| 2063                     | Q3U2V0           | 8                    | 10             | 10                    | 1282   | 142258 | 6.2  | Putative uncharacterized protein                                                                                                                    |
| 2063                     | Q3U2B5           | 8                    | 10             | 10                    | 1282   | 142057 | 6.1  | Putative uncharacterized protein                                                                                                                    |
| 2063                     | E9QMP4           | 8                    | 10             | 9.9                   | 1288   | 142620 | 6.1  | Uncharacterized protein                                                                                                                             |
| 2064                     | Q9ERV6           | 8                    | 19             | 16                    | 643    | 71477  | 7    | Epidermal growth factor receptor isoform 2                                                                                                          |
| 2064                     | Q9WVF5           | 8                    | 19             | 15.7                  | 655    | 72907  | 7    | Epidermal growth factor receptor                                                                                                                    |
| 2064                     | Q01279           | 8                    | 19             | 8.5                   | 1210   | 134853 | 6.9  | Epidermal growth factor receptor                                                                                                                    |
| 2064                     | Q9EP98           | 8                    | 19             | 8.5                   | 1210   | 134841 | 6.9  | Epidermal growth factor receptor                                                                                                                    |
| 2065                     | E9PYJ6           | 8                    | 9              | 5.6                   | 1712   | 189556 | 6.9  | Uncharacterized protein                                                                                                                             |
| 2065                     | A2AKG8           | 8                    | 9              | 5.3                   | 1798   | 198948 | 6.7  | Uncharacterized protein KIAA1797                                                                                                                    |
| 2066                     | P14174           | 8                    | 408            | 93.9                  | 115    | 12476  | 7.9  | Macrophage migration inhibitory factor                                                                                                              |
| 2067                     | P05387           | 8                    | 33             | 85.2                  | 115    | 11665  | 4.5  | 60S acidic ribosomal protein P2                                                                                                                     |
| 2068                     | P09382           | 8                    | 231            | 77.8                  | 135    | 14716  | 5.5  | Galectin-1                                                                                                                                          |
| 2069                     | Q15370           | 8                    | 25             | 76.3                  | 118    | 13133  | 4.9  | Transcription elongation factor B polypeptide 2                                                                                                     |
| 2070                     | Q9BRA2           | 8                    | 97             | 75.6                  | 123    | 13941  | 5.5  | Thioredoxin domain-containing protein 17                                                                                                            |
| 2071                     | P58546           | 8                    | 45             | 72.9                  | 118    | 12895  | 5.5  | Myotrophin                                                                                                                                          |
| 2072                     | UPI0001FD28E7    | 8                    | 27             | 73.8                  | 225    | 24513  | 5.6  | D-ribose-5-phosphate-3-epimerase                                                                                                                    |
| 2072                     | Q96AT9           | 8                    | 27             | 72.8                  | 228    | 24928  | 5.6  | Ribulose-phosphate 3-epimerase                                                                                                                      |
| 2073                     | Q9NWW4           | 8                    | 27             | 71.2                  | 160    | 18048  | 5    | UPF0587 protein C1orf123                                                                                                                            |
| 2074                     | P07741           | 8                    | 41             | 70                    | 180    | 19608  | 6    | Adenine phosphoribosyltransferase                                                                                                                   |
| 2075                     | O00762           | 8                    | 17             | 69.3                  | 179    | 19652  | 7.4  | Ubiquitin-conjugating enzyme E2 C                                                                                                                   |
| 2076                     | Q8NBT2           | 8                    | 16             | 89                    | 197    | 22443  | 4.7  | Kinetochores protein Spc24                                                                                                                          |
| 2077                     | Q9NVP2           | 8                    | 20             | 68.8                  | 202    | 22434  | 4.6  | Histone chaperone ASF1B                                                                                                                             |
| 2078                     | Q9H773           | 8                    | 14             | 68.2                  | 170    | 18681  | 5    | dCTP pyrophosphatase 1                                                                                                                              |
| 2079                     | Q9Y281           | 8                    | 41             | 66.9                  | 166    | 18737  | 7.9  | Cofilin-2                                                                                                                                           |
| 2080                     | Q8TCA0           | 8                    | 12             | 66.3                  | 184    | 20509  | 6.5  | Leucine-rich repeat-containing protein 20                                                                                                           |
| 2081                     | P02511           | 8                    | 93             | 64.6                  | 175    | 20159  | 7.3  | Alpha-crystallin B chain                                                                                                                            |
| 2082                     | Q9NRV9           | 8                    | 19             | 64                    | 189    | 21097  | 5.8  | Heme-binding protein 1                                                                                                                              |
| 2083                     | P43487           | 8                    | 31             | 63.2                  | 201    | 23310  | 5.3  | Ran-specific GTPase-activating protein                                                                                                              |
| 2084                     | P24534           | 8                    | 76             | 63.1                  | 225    | 24764  | 4.7  | Elongation factor 1-beta                                                                                                                            |
| 2085                     | O60232           | 8                    | 24             | 62.8                  | 199    | 21474  | 5.2  | Sjogren syndrome/scleroderma autoantigen 1                                                                                                          |
| 2086                     | Q9HOA8           | 8                    | 14             | 62.3                  | 199    | 21764  | 7.3  | COMM domain-containing protein 4                                                                                                                    |
| 2087                     | P41567           | 8                    | 36             | 61.9                  | 193    | 12732  | 7.5  | Eukaryotic translation initiation factor 1                                                                                                          |
| 2088                     | O75340           | 8                    | 19             | 61.3                  | 111    | 21868  | 5.4  | Programmed cell death protein 6                                                                                                                     |
| 2089                     | Q13404           | 8                    | 188            | 60.5                  | 147    | 16495  | 8    | Ubiquitin-conjugating enzyme E2 variant 1                                                                                                           |
| 2089                     | Q13404-7         | 8                    | 188            | 52.4                  | 179    | 19307  | 8.5  | Isoform 5 of Ubiquitin-conjugating enzyme E2 variant 1                                                                                              |
| 2089                     | Q13404-2         | 8                    | 188            | 52.4                  | 170    | 19228  | 8.2  | Isoform 2 of Ubiquitin-conjugating enzyme E2 variant 1                                                                                              |
| 2089                     | Q13404-1         | 8                    | 188            | 40.3                  | 221    | 25797  | 8.3  | Isoform 1 of Ubiquitin-conjugating enzyme E2 variant 1                                                                                              |
|                          |                  |                      |                |                       |        |        |      | Ubiquitin-conjugating enzyme E2 variant 1 (UEV-1) (CROC-1) (Ubiquitin-conjugating enzyme variant Kua) (TRAF6-regulated IKK activator 1 beta Uev1A). |
| 2089                     | UPI0000367052    | 8                    | 188            | 24.1                  | 370    | 42209  | 6.7  | activator 1 beta Uev1A).                                                                                                                            |
| 2089                     | UPI0000233611    | 8                    | 188            | 24.1                  | 370    | 42210  | 6.6  | TMEM189-UBE2V1 fusion protein                                                                                                                       |
| 2090                     | Q9BSD7           | 8                    | 12             | 60                    | 190    | 20713  | 9.5  | Cancer-related nucleoside-triphosphatase                                                                                                            |
| 2091                     | Q9GZQ3           | 8                    | 21             | 59.8                  | 224    | 24670  | 7    | COMM domain-containing protein 5                                                                                                                    |
| 2092                     | P40616           | 8                    | 22             | 59.7                  | 181    | 20418  | 5.7  | ADP-ribosylation factor-like protein 1                                                                                                              |
| 2093                     | Q7Z4H3           | 8                    | 25             | 59.3                  | 204    | 23390  | 5.5  | HD domain-containing protein 2                                                                                                                      |
| 2094                     | Q95881           | 8                    | 23             | 58.7                  | 172    | 19206  | 5.4  | Thioredoxin domain-containing protein 12                                                                                                            |
| 2095                     | B5BUI8           | 8                    | 32             | 57.8                  | 185    | 20577  | 8.2  | Dual specificity phosphatase 3 (Fragment)                                                                                                           |
| 2095                     | P51452           | 8                    | 32             | 57.8                  | 185    | 20478  | 7.8  | Dual specificity protein phosphatase 3                                                                                                              |
| 2096                     | O15511           | 8                    | 42             | 57.6                  | 151    | 16320  | 5.7  | Actin-related protein 2/3 complex subunit 5                                                                                                         |
| 2097                     | Q9Y6G5           | 8                    | 12             | 56.9                  | 202    | 22966  | 6.5  | COMM domain-containing protein 10                                                                                                                   |
| 2098                     | UPI00015DFEA6    | 8                    | 21             | 56.2                  | 203    | 22593  | 9.5  | Protein wib log (Partner of Y14 and mago log).                                                                                                      |
| 2098                     | Q9BRP8-2         | 8                    | 21             | 56.2                  | 203    | 22705  | 9.4  | Isoform 2 of Partner of Y14 and mago                                                                                                                |
| 2098                     | Q9BRP8           | 8                    | 21             | 55.9                  | 204    | 22656  | 9.5  | Partner of Y14 and mago                                                                                                                             |
| 2099                     | Q8IZQ5           | 8                    | 33             | 55.7                  | 122    | 13303  | 9.7  | Selenoprotein H                                                                                                                                     |
| 2100                     | Q07812-8         | 8                    | 18             | 58.7                  | 179    | 19718  | 5.4  | Isoform Sigma of Apoptosis regulator BAX                                                                                                            |
| 2100                     | Q07812           | 8                    | 18             | 54.7                  | 192    | 21184  | 5.2  | Apoptosis regulator BAX                                                                                                                             |
| 2100                     | Q07812-2         | 8                    | 18             | 48.2                  | 218    | 24220  | 7.9  | Isoform Beta of Apoptosis regulator BAX                                                                                                             |
| 2101                     | Q96AZ6           | 8                    | 10             | 54.7                  | 181    | 20363  | 8.9  | Interferon-stimulated gene 20 kDa protein                                                                                                           |
| 2102                     | Q9H444           | 8                    | 11             | 54.5                  | 224    | 24950  | 4.8  | Charged multivesicular body protein 4b                                                                                                              |
| 2103                     | P11441           | 8                    | 18             | 52.9                  | 157    | 17776  | 8.7  | Ubiquitin-like protein 4A                                                                                                                           |
| 2104                     | Q99828           | 8                    | 9              | 52.9                  | 191    | 21703  | 4.8  | Calcium and integrin-binding protein 1                                                                                                              |
| 2105                     | B2REB8           | 8                    | 94             | 51.7                  | 265    | 30993  | 4.2  | SET nuclear oncogene                                                                                                                                |
| 2106                     | B2R4B9           | 8                    | 24             | 50.9                  | 175    | 20078  | 5.6  | Ferritin                                                                                                                                            |
| 2106                     | Q8WU07           | 8                    | 24             | 50.9                  | 175    | 20062  | 5.8  | Ferritin                                                                                                                                            |
| 2106                     | Q6IBT7           | 8                    | 24             | 50.9                  | 175    | 19992  | 5.8  | Ferritin                                                                                                                                            |
| 2106                     | P02792           | 8                    | 24             | 50.9                  | 175    | 20020  | 5.8  | Ferritin light chain                                                                                                                                |
| 2107                     | Q86SZ2           | 8                    | 15             | 50.6                  | 158    | 17983  | 8.7  | Trafficking protein particle complex subunit 6B                                                                                                     |
| 2108                     | Q9NRF9           | 8                    | 23             | 50.3                  | 147    | 16860  | 4.7  | DNA polymerase epsilon subunit 3                                                                                                                    |
| 2109                     | O75828           | 8                    | 11             | 50.2                  | 277    | 30850  | 6.2  | Carbonyl reductase [NADPH] 3                                                                                                                        |
|                          |                  |                      |                |                       |        |        |      | RNA polymerase II subunit A C-terminal domain phosphatase                                                                                           |
| 2110                     | Q9NP77           | 8                    | 23             | 50                    | 194    | 22574  | 5.3  | SSU72                                                                                                                                               |
| 2111                     | Q9NTM9           | 8                    | 39             | 49.8                  | 273    | 29341  | 8.2  | Copper homeostasis protein cutC log                                                                                                                 |
| 2112                     | P16949           | 8                    | 28             | 49.7                  | 149    | 17302  | 6    | Stathmin                                                                                                                                            |
| 2113                     | O75832           | 8                    | 32             | 49.1                  | 226    | 24428  | 6.1  | 26S proteasome non-ATPase regulatory subunit 10                                                                                                     |
| 2114                     | P28070           | 8                    | 56             | 48.5                  | 264    | 29204  | 7    | Proteasome subunit beta type-4                                                                                                                      |
| 2115                     | Q6P587           | 8                    | 23             | 48.2                  | 224    | 24843  | 6.4  | Fumarylacetoacetate hydrolase domain-containing protein 1                                                                                           |
| 2116                     | Q9UBI1           | 8                    | 12             | 48.2                  | 195    | 22151  | 6    | COMM domain-containing protein 3                                                                                                                    |
| 2117                     | Q9NQ88           | 8                    | 12             | 47.8                  | 270    | 30063  | 7.7  | Probable fructose-2,6-bisphosphatase TIGAR                                                                                                          |
| 2118                     | Q9Y5Z4           | 8                    | 18             | 46.8                  | 205    | 22875  | 4.6  | Heme-binding protein 2                                                                                                                              |
| 2119                     | Q15126           | 8                    | 19             | 46.4                  | 192    | 21995  | 5.7  | Phosphomevalonate kinase                                                                                                                            |
| 2120                     | Q9H4A6           | 8                    | 29             | 46.3                  | 298    | 33811  | 6.4  | Golgi phosphoprotein 3                                                                                                                              |
|                          |                  |                      |                |                       |        |        |      | cDNA FLJ30970 fis, clone HEART2000444, highly similar to sapiens phospholysine phosphohistidine inorganic pyrophosphatase (LHPP), mRNA              |
| 2121                     | B3KP20           | 8                    | 19             | 45.9                  | 270    | 29221  | 6.4  | Phospholysine phosphohistidine inorganic pyrophosphatase phosphatase (LHPP), mRNA                                                                   |
| 2121                     | Q9H008           | 8                    | 19             | 45.9                  | 270    | 29165  | 6.2  | Phospholysine phosphohistidine inorganic pyrophosphatase phosphatase                                                                                |
| 2122                     | P35080-2         | 8                    | 155            | 61.4                  | 140    | 15088  | 6.1  | Isoform IIb of Profilin-2                                                                                                                           |
| 2122                     | B4DNH1           | 8                    | 155            | 45.7                  | 188    | 20840  | 7.8  | Profilin                                                                                                                                            |
| 2122                     | UPI0000EE20CE    | 8                    | 155            | 45.7                  | 188    | 20787  | 7.5  | UPI0000EE20CE UniRef100 entry                                                                                                                       |
| 2122                     | D3DNI2           | 8                    | 155            | 25.7                  | 334    | 34944  | 10.3 | Profilin (Fragment)                                                                                                                                 |
| 2123                     | Q9BV57           | 8                    | 37             | 45.3                  | 179    | 21498  | 5.7  | 1,2-dihydroxy-3-keto-5-methylthiopentene dioxygenase                                                                                                |
| 2124                     | P61006           | 8                    | 52             | 44.9                  | 207    | 23668  | 9.1  | Ras-related protein Rab-8A                                                                                                                          |

Table S1. Proteins identified in the OVCAR-3 tumor supernatant by two or more unique peptides.

| Protein or Protein Group | Accession Number | Unique Peptide Count | Spectrum Count | Sequence Coverage (%) | Length | MolWt | pI   | Descriptive Name                                                                                                       |
|--------------------------|------------------|----------------------|----------------|-----------------------|--------|-------|------|------------------------------------------------------------------------------------------------------------------------|
| 2125                     | Q9Y3B8-2         | 8                    | 17             | 53.3                  | 199    | 23208 | 6.1  | Isoform 2 of Oligoribonuclease, mitochondrial                                                                          |
| 2125                     | Q9Y3B8           | 8                    | 17             | 44.7                  | 237    | 26833 | 6.9  | Oligoribonuclease, mitochondrial                                                                                       |
| 2126                     | Q9H081           | 8                    | 8              | 44.4                  | 205    | 24140 | 5.7  | Protein MIS12 log                                                                                                      |
| 2127                     | Q96B26           | 8                    | 11             | 44.2                  | 276    | 30040 | 5.3  | Exosome complex exonuclease RRP43                                                                                      |
| 2128                     | Q15056           | 8                    | 81             | 44                    | 248    | 27385 | 7.2  | Eukaryotic translation initiation factor 4H                                                                            |
| 2129                     | P06748-2         | 8                    | 344            | 48.7                  | 265    | 29465 | 4.6  | Isoform 2 of Nucleophosmin                                                                                             |
| 2129                     | P06748           | 8                    | 344            | 43.9                  | 294    | 32575 | 4.8  | Nucleophosmin<br>cDNA FLJ40459 fis, clone TESTI2041800, highly similar to                                              |
| 2130                     | B3KUR3           | 8                    | 17             | 43.4                  | 242    | 27992 | 5.8  | BISPHOSPHOGLYCERATE MUTASE (EC 5.4.2.4)                                                                                |
| 2130                     | P07738           | 8                    | 17             | 40.5                  | 259    | 30005 | 6.5  | Bisphosphoglycerate mutase                                                                                             |
| 2131                     | P46778           | 8                    | 42             | 43.1                  | 160    | 18565 | 10.5 | 60S ribosomal protein L21                                                                                              |
| 2132                     | B3KXN9           | 8                    | 18             | 42.6                  | 270    | 29854 | 6    | cDNA FLJ45793 fis, clone NT2RI2009233                                                                                  |
| 2132                     | Q96SZ5           | 8                    | 18             | 42.6                  | 270    | 29751 | 6    | 2-aminoethanethiol dioxygenase                                                                                         |
| 2133                     | Q07020           | 8                    | 28             | 42.6                  | 188    | 21634 | 11.7 | 60S ribosomal protein L18                                                                                              |
| 2134                     | Q14972           | 8                    | 19             | 42.4                  | 297    | 33010 | 7.7  | Down syndrome critical region protein 3                                                                                |
| 2135                     | Q95292           | 8                    | 40             | 42.4                  | 243    | 27228 | 7.3  | Vesicle-associated membrane protein-associated protein B/C                                                             |
| 2136                     | P35219           | 8                    | 12             | 42.1                  | 290    | 32973 | 4.9  | Carbonic anhydrase-related protein                                                                                     |
| 2137                     | Q32Q75           | 8                    | 21             | 45.2                  | 217    | 25067 | 6.1  | Eukaryotic translation initiation factor 4E                                                                            |
| 2137                     | P06730           | 8                    | 21             | 45.2                  | 217    | 25097 | 6.1  | Eukaryotic translation initiation factor 4E<br>cDNA FLJ55157, highly similar to Eukaryotic translation initiation      |
| 2137                     | B7Z6V1           | 8                    | 21             | 41.4                  | 237    | 27260 | 6.8  | factor 4E                                                                                                              |
| 2137                     | D6RBW1           | 8                    | 21             | 40                    | 245    | 28512 | 8.1  | Uncharacterized protein                                                                                                |
| 2137                     | D6RCQ6           | 8                    | 21             | 39.5                  | 248    | 28778 | 6.4  | Uncharacterized protein                                                                                                |
| 2138                     | P13984           | 8                    | 20             | 41                    | 249    | 28380 | 9.2  | General transcription factor IIF subunit 2                                                                             |
| 2139                     | P49366           | 8                    | 12             | 39.8                  | 369    | 40971 | 5.4  | Deoxyhypusine synthase                                                                                                 |
| 2140                     | Q9HW84           | 8                    | 11             | 39.4                  | 249    | 27798 | 8.2  | Pleckstrin logy domain-containing family F member 2                                                                    |
| 2141                     | Q02543           | 8                    | 24             | 39.2                  | 176    | 20762 | 10.7 | 60S ribosomal protein L18a                                                                                             |
| 2142                     | P48507           | 8                    | 14             | 39.1                  | 274    | 30727 | 6    | Glutamate--cysteine ligase regulatory subunit                                                                          |
| 2143                     | Q00625           | 8                    | 14             | 39                    | 290    | 32113 | 6.9  | Pirin                                                                                                                  |
| 2144                     | B2RDZ9           | 8                    | 16             | 38.1                  | 291    | 31874 | 5.3  | cDNA, FLJ96850                                                                                                         |
| 2144                     | Q15024           | 8                    | 16             | 38.1                  | 291    | 31821 | 5.2  | Exosome complex exonuclease RRP42                                                                                      |
| 2145                     | Q13151           | 8                    | 34             | 38                    | 305    | 30841 | 9.3  | Heterogeneous nuclear ribonucleoprotein A0                                                                             |
| 2146                     | Q9NWW8           | 8                    | 10             | 37.4                  | 329    | 36560 | 4.6  | BRISC and BRCA1-A complex member 1                                                                                     |
| 2147                     | P49770           | 8                    | 11             | 37.3                  | 351    | 38990 | 6.2  | Translation initiation factor eIF-2B subunit beta                                                                      |
| 2148                     | Q96BJ3           | 8                    | 17             | 37.3                  | 306    | 35023 | 6.6  | Axin interactor, dorsolization-associated protein                                                                      |
| 2148                     | UPI000013EF67    | 8                    | 17             | 37.3                  | 306    | 34925 | 6.7  | PREDICTED: axin interactor, dorsolization-associated protein-like                                                      |
| 2149                     | P30084           | 8                    | 15             | 37.2                  | 290    | 31387 | 8.1  | Enoyl-CoA hydratase, mitochondrial                                                                                     |
| 2150                     | A8K9V9           | 8                    | 23             | 36.1                  | 310    | 34532 | 5.4  | cDNA FLJ76064                                                                                                          |
| 2150                     | Q96KN1           | 8                    | 23             | 36.1                  | 310    | 34474 | 5.5  | Protein FAM84B                                                                                                         |
| 2151                     | P80217           | 8                    | 20             | 36                    | 286    | 31546 | 6.1  | Interferon-induced 35 kDa protein                                                                                      |
| 2151                     | P80217-2         | 8                    | 20             | 35.8                  | 288    | 31777 | 6.1  | Isoform 2 of Interferon-induced 35 kDa protein                                                                         |
| 2152                     | Q13242           | 8                    | 22             | 34.4                  | 221    | 25542 | 8.6  | Serine/arginine-rich splicing factor 9                                                                                 |
| 2153                     | Q95749           | 8                    | 10             | 34                    | 300    | 34871 | 6.1  | Geranylgeranyl pyrophosphate synthase                                                                                  |
| 2154                     | E7EQV7           | 8                    | 20             | 33.6                  | 542    | 58329 | 8    | Uncharacterized protein                                                                                                |
| 2154                     | E7EUE8           | 8                    | 20             | 33.6                  | 542    | 58349 | 8    | Uncharacterized protein                                                                                                |
| 2155                     | Q05BK6           | 8                    | 85             | 33.3                  | 366    | 40691 | 6.4  | TFG protein                                                                                                            |
| 2155                     | Q7Z426           | 8                    | 85             | 30.8                  | 396    | 43006 | 5.2  | Putative MAPK activating protein                                                                                       |
| 2155                     | Q92734           | 8                    | 85             | 30.5                  | 400    | 43448 | 5.1  | Protein TFG                                                                                                            |
| 2155                     | Q8TDJ5           | 8                    | 85             | 15.2                  | 803    | 88671 | 6.3  | Tyrosine-protein kinase receptor                                                                                       |
| 2156                     | Q96S99           | 8                    | 18             | 43.4                  | 279    | 31195 | 8.2  | Pleckstrin logy domain-containing family F member 1<br>cDNA FLJ55258, highly similar to sapiens pleckstrin logy domain |
| 2156                     | B4DWN9           | 8                    | 18             | 33.2                  | 364    | 40679 | 8.6  | containing, family F member 1, mRNA                                                                                    |
| 2157                     | P32456           | 8                    | 12             | 33.2                  | 591    | 67209 | 5.7  | Interferon-induced guanylate-binding protein 2                                                                         |
| 2158                     | Q9UMX0           | 8                    | 29             | 33.1                  | 589    | 62519 | 5.1  | Ubiquilin-1                                                                                                            |
| 2159                     | O43681           | 8                    | 16             | 33                    | 348    | 38793 | 4.9  | ATPase ASNA1                                                                                                           |
| 2160                     | C7DUW4           | 8                    | 17             | 32.9                  | 346    | 39219 | 7.4  | Mitogen activated protein kinase kinase 3                                                                              |
| 2160                     | P46734           | 8                    | 17             | 32.9                  | 347    | 39318 | 7.4  | Dual specificity mitogen-activated protein kinase kinase 3                                                             |
| 2160                     | C9J118           | 8                    | 17             | 32.5                  | 351    | 39853 | 7.5  | Uncharacterized protein<br>Isoform 2 of Dual specificity mitogen-activated protein kinase                              |
| 2160                     | P46734-3         | 8                    | 17             | 32.4                  | 352    | 39940 | 7.5  | kinase 3                                                                                                               |
| 2161                     | P08754           | 8                    | 12             | 32.8                  | 354    | 40532 | 5.7  | Guanine nucleotide-binding protein G(k) subunit alpha                                                                  |
| 2162                     | B5BU16           | 8                    | 11             | 32.6                  | 334    | 37464 | 7.1  | Mitogen-activated protein kinase kinase 6                                                                              |
| 2162                     | UPI0001AE66AC    | 8                    | 11             | 32.6                  | 334    | 37532 | 7.1  | UPI0001AE66AC UniRef100 entry                                                                                          |
| 2162                     | P52564           | 8                    | 11             | 32.6                  | 334    | 37492 | 7.4  | Dual specificity mitogen-activated protein kinase kinase 6                                                             |
| 2163                     | Q969U7           | 8                    | 22             | 31.8                  | 264    | 29396 | 7    | Proteasome assembly chaperone 2                                                                                        |
| 2164                     | Q9BYG5           | 8                    | 18             | 31.5                  | 372    | 41182 | 5.6  | Partitioning defective 6 log beta                                                                                      |
| 2165                     | Q9Y2Z0-2         | 8                    | 16             | 33.9                  | 333    | 37805 | 5.2  | Isoform 2 of Suppressor of G2 allele of SKP1 log<br>cDNA FLJ75365, highly similar to sapiens SUGT1B (SUGT1)            |
| 2165                     | A8K5T7           | 8                    | 16             | 31                    | 365    | 41052 | 5.2  | mRNA                                                                                                                   |
| 2165                     | Q9Y2Z0           | 8                    | 16             | 31                    | 365    | 41024 | 5.2  | Suppressor of G2 allele of SKP1 log                                                                                    |
| 2166                     | B2RAR3           | 8                    | 18             | 30.8                  | 403    | 43990 | 7.4  | Queuine tRNA-ribosyltransferase                                                                                        |
| 2166                     | Q9BXR0           | 8                    | 18             | 30.8                  | 403    | 44048 | 7.2  | Queuine tRNA-ribosyltransferase                                                                                        |
| 2167                     | Q95456-2         | 8                    | 25             | 33                    | 267    | 30288 | 7.8  | Isoform 2 of Proteasome assembly chaperone 1                                                                           |
| 2167                     | Q95456           | 8                    | 25             | 30.6                  | 288    | 32854 | 7.2  | Proteasome assembly chaperone 1                                                                                        |
| 2168                     | P49247           | 8                    | 14             | 29.9                  | 311    | 33269 | 8.5  | Ribose-5-phosphate isomerase<br>cDNA FLJ52285, highly similar to Vesicular integral-membrane                           |
| 2169                     | B4DWN1           | 8                    | 12             | 37.2                  | 285    | 32578 | 6.5  | protein VIP36                                                                                                          |
| 2169                     | D6RBV2           | 8                    | 12             | 32.6                  | 325    | 36543 | 6.7  | Uncharacterized protein<br>cDNA FLJ75774, highly similar to sapiens lectin, mannose-binding                            |
| 2169                     | A8K7T4           | 8                    | 12             | 29.8                  | 356    | 40243 | 7    | 2 (LMAN2), mRNA                                                                                                        |
| 2169                     | Q12907           | 8                    | 12             | 29.8                  | 356    | 40229 | 7    | Vesicular integral-membrane protein VIP36                                                                              |
| 2170                     | Q9H8Y8           | 8                    | 31             | 30.5                  | 452    | 47145 | 4.8  | Golgi reassembly-stacking protein 2<br>cDNA FLJ59712, highly similar to Golgi reassembly-stacking                      |
| 2170                     | B4DKT0           | 8                    | 31             | 29.7                  | 464    | 48674 | 4.8  | protein 2                                                                                                              |
| 2171                     | Q9GZL7           | 8                    | 12             | 29.6                  | 423    | 47708 | 5.9  | Ribosome biogenesis protein WDR12                                                                                      |
| 2172                     | Q8IU18           | 8                    | 13             | 28.3                  | 442    | 49766 | 5.1  | Cytokine receptor-like factor 3<br>cDNA FLJ59519, highly similar to U4/U6.U5 tri-snRNP-associated                      |
| 2173                     | B4DHT4           | 8                    | 16             | 27.9                  | 462    | 53510 | 8.6  | protein 2                                                                                                              |
| 2173                     | Q53GS9           | 8                    | 16             | 22.8                  | 565    | 65381 | 8.9  | U4/U6.U5 tri-snRNP-associated protein 2<br>cDNA FLJ78528, highly similar to sapiens vacuolar protein sorting           |
| 2174                     | A8K4G7           | 8                    | 15             | 26.6                  | 444    | 49273 | 6.8  | 4B (yeast) (VPS4B), mRNA                                                                                               |
| 2174                     | O75351           | 8                    | 15             | 26.6                  | 444    | 49302 | 7.2  | Vacuolar protein sorting-associated protein 4B<br>cDNA FLJ75934, highly similar to sapiens vacuolar protein sorting    |
| 2174                     | A8K5D8           | 8                    | 15             | 26.6                  | 444    | 49231 | 7    | 4B (yeast) (VPS4B), mRNA                                                                                               |
| 2175                     | P06746           | 8                    | 11             | 26.6                  | 335    | 38178 | 8.9  | DNA polymerase beta                                                                                                    |
| 2175                     | Q53EV2           | 8                    | 11             | 26.6                  | 335    | 38162 | 8.9  | Polymerase (DNA directed), beta variant (Fragment)                                                                     |
| 2176                     | Q9NR50-2         | 8                    | 9              | 28.4                  | 412    | 46145 | 7.1  | Isoform 2 of Translation initiation factor eIF-2B subunit gamma                                                        |
| 2176                     | Q9NR50           | 8                    | 9              | 25.9                  | 452    | 50240 | 6.5  | Translation initiation factor eIF-2B subunit gamma                                                                     |
| 2177                     | P50552           | 8                    | 21             | 25.5                  | 380    | 39830 | 8.9  | Vasodilator-stimulated phosphoprotein                                                                                  |
| 2178                     | B0VJZ1           | 8                    | 13             | 25.3                  | 478    | 50767 | 7.5  | Leukocyte receptor cluster (LRC) member 9                                                                              |
| 2179                     | Q5W0U4           | 8                    | 11             | 24.4                  | 402    | 44381 | 6.4  | B box and SPRY domain-containing protein                                                                               |
| 2180                     | Q96Q11-2         | 8                    | 13             | 25.4                  | 414    | 47829 | 8.5  | Isoform 2 of CCA tRNA nucleotidyltransferase 1, mitochondrial                                                          |

Table S1. Proteins identified in the OVCAR-3 tumor supernatant by two or more unique peptides.

| Protein or Protein Group | Accession Number | Unique Peptide Count | Spectrum Count | Sequence Coverage (%) | Length | MolWt  | pI  | Descriptive Name                                                                                                                                                                     |
|--------------------------|------------------|----------------------|----------------|-----------------------|--------|--------|-----|--------------------------------------------------------------------------------------------------------------------------------------------------------------------------------------|
| 2180                     | Q96Q11           | 8                    | 13             | 24.2                  | 434    | 50128  | 8.1 | CCA tRNA nucleotidyltransferase 1, mitochondrial                                                                                                                                     |
| 2181                     | Q92879-2         | 8                    | 17             | 24.3                  | 482    | 51546  | 8.5 | Isoform 2 of CUGBP Elav-like family member 1                                                                                                                                         |
| 2181                     | Q92879-3         | 8                    | 17             | 24.2                  | 483    | 51617  | 8.5 | Isoform 3 of CUGBP Elav-like family member 1                                                                                                                                         |
| 2181                     | Q92879           | 8                    | 17             | 24.1                  | 486    | 52063  | 8.5 | CUGBP Elav-like family member 1                                                                                                                                                      |
| 2181                     | UPI0000EE39EF    | 8                    | 17             | 24                    | 487    | 52134  | 8.5 | UPI0000EE39EF UniRef100 entry                                                                                                                                                        |
| 2181                     | Q92879-4         | 8                    | 17             | 22.9                  | 512    | 55001  | 8.4 | Isoform 4 of CUGBP Elav-like family member 1                                                                                                                                         |
| 2182                     | Q95396           | 8                    | 11             | 23.7                  | 460    | 49669  | 6.2 | Adenylyltransferase and sulfurtransferase MOCS3<br>cDNA FLJ77237, highly similar to sapiens sparco/osteonectin, cwcv and kazal-like domains proteoglycan (testican) 2 (SPOCK2), mRNA |
| 2183                     | A8K8G3           | 8                    | 35             | 23.6                  | 424    | 46825  | 4.8 | mRNA                                                                                                                                                                                 |
| 2183                     | Q92563           | 8                    | 35             | 23.6                  | 424    | 46779  | 4.8 | Testican-2                                                                                                                                                                           |
| 2184                     | Q9UJA5           | 8                    | 9              | 23.5                  | 497    | 55799  | 7.5 | tRNA (adenine-N(1)-)-methyltransferase non-catalytic subunit TRM6                                                                                                                    |
| 2185                     | B4DDV1           | 8                    | 11             | 26                    | 434    | 50520  | 7.8 | cDNA FLJ53857, highly similar to Interferon-induced protein with tetrapeptide repeats 5                                                                                              |
| 2185                     | B2R5X9           | 8                    | 11             | 23.4                  | 482    | 55946  | 7.6 | cDNA, FLJ92678, highly similar to sapiens interferon-induced protein with tetrapeptide repeats 5 (IFIT5), mRNA                                                                       |
| 2185                     | Q13325           | 8                    | 11             | 23.4                  | 482    | 55847  | 7.4 | Interferon-induced protein with tetrapeptide repeats 5                                                                                                                               |
| 2186                     | Q8N6H7           | 8                    | 15             | 22.3                  | 521    | 56720  | 8   | ADP-ribosylation factor GTPase-activating protein 2                                                                                                                                  |
| 2187                     | A8K9B9           | 8                    | 8              | 21.8                  | 541    | 61156  | 6.7 | cDNA FLJ77391, highly similar to sapiens EH-domain containing 4 (EHD4), mRNA                                                                                                         |
| 2187                     | Q9H223           | 8                    | 8              | 21.8                  | 541    | 61175  | 6.8 | EH domain-containing protein 4                                                                                                                                                       |
| 2188                     | Q43148           | 8                    | 14             | 22.3                  | 476    | 54844  | 6.6 | mRNA cap guanine-N7 methyltransferase                                                                                                                                                |
| 2188                     | A8K946           | 8                    | 14             | 21                    | 504    | 57751  | 7.7 | mRNA cap guanine-N7 methyltransferase                                                                                                                                                |
| 2188                     | Q43148-2         | 8                    | 14             | 21                    | 504    | 57725  | 7.7 | Isoform 2 of mRNA cap guanine-N7 methyltransferase                                                                                                                                   |
| 2189                     | O9BVJ8           | 8                    | 22             | 27.6                  | 409    | 47094  | 5   | HEXA protein (Fragment)                                                                                                                                                              |
| 2189                     | B4DVA7           | 8                    | 22             | 20.9                  | 540    | 62013  | 5.3 | cDNA FLJ53927, highly similar to Beta-hexosaminidase alpha chain (EC 3.2.1.52)                                                                                                       |
| 2190                     | Q53HT6           | 8                    | 13             | 26.4                  | 246    | 27962  | 8.4 | B-cell receptor-associated protein 31 variant (Fragment)                                                                                                                             |
| 2190                     | Q53G72           | 8                    | 13             | 26.4                  | 246    | 27931  | 8.4 | B-cell receptor-associated protein 31 variant (Fragment)                                                                                                                             |
| 2190                     | P51572           | 8                    | 13             | 26.4                  | 246    | 27992  | 8.4 | B-cell receptor-associated protein 31                                                                                                                                                |
| 2190                     | B3KQ79           | 8                    | 13             | 20.8                  | 313    | 34752  | 7.8 | B-cell receptor-associated protein 31, isoform CRA_b                                                                                                                                 |
| 2191                     | Q3ZCQ8           | 8                    | 42             | 26.3                  | 353    | 39646  | 8.4 | Mitochondrial import inner membrane translocase subunit TIM50                                                                                                                        |
| 2191                     | Q0VAB1           | 8                    | 42             | 20.4                  | 456    | 50479  | 9.4 | Translocase of inner mitochondrial membrane 50 log (S. cerevisiae)                                                                                                                   |
| 2191                     | Q3ZCQ8-2         | 8                    | 42             | 20.4                  | 456    | 50465  | 9.4 | Isoform 2 of Mitochondrial import inner membrane translocase subunit TIM50                                                                                                           |
| 2192                     | B4DXZ1           | 8                    | 12             | 20.2                  | 540    | 62154  | 7.1 | cDNA FLJ51768, highly similar to Asparagine synthetase (glutamine-hydrolyzing) (EC 6.3.5.4)                                                                                          |
| 2192                     | P08243           | 8                    | 12             | 19.4                  | 561    | 64370  | 6.9 | Asparagine synthetase [glutamine-hydrolyzing]                                                                                                                                        |
| 2193                     | Q8NA80           | 8                    | 41             | 21.3                  | 534    | 58309  | 9.2 | cDNA FLJ35762 fis, clone TESTI2004793, moderately similar to sapiens NY-REN-2 antigen mRNA                                                                                           |
| 2193                     | Q7Z739           | 8                    | 41             | 19.5                  | 585    | 63861  | 9   | YTH domain family protein 3                                                                                                                                                          |
| 2193                     | B4DPX9           | 8                    | 41             | 19.4                  | 588    | 64522  | 8.2 | cDNA FLJ56221, highly similar to YTH domain protein 3                                                                                                                                |
| 2194                     | Q92804           | 8                    | 104            | 18.8                  | 592    | 61830  | 8   | TATA-binding protein-associated factor 2N                                                                                                                                            |
| 2194                     | Q92804-2         | 8                    | 104            | 18.8                  | 589    | 61558  | 8   | Isoform Short of TATA-binding protein-associated factor 2N                                                                                                                           |
| 2195                     | O95352           | 8                    | 12             | 18.1                  | 703    | 77960  | 6.2 | Ubiquitin-like modifier-activating enzyme ATG7                                                                                                                                       |
| 2196                     | P43405-2         | 8                    | 9              | 17.8                  | 612    | 69510  | 7.6 | Isoform Short of Tyrosine-protein kinase SYK<br>cDNA FLJ51723, highly similar to DCC-interacting protein 13 alpha (Fragment)                                                         |
| 2197                     | B4DQX8           | 8                    | 13             | 17.4                  | 633    | 71339  | 5.8 | DCC-interacting protein 13-alpha                                                                                                                                                     |
| 2197                     | Q9UKG1           | 8                    | 13             | 15.5                  | 709    | 79664  | 5.4 | Uncharacterized protein                                                                                                                                                              |
| 2198                     | E9PDE8           | 8                    | 20             | 18.3                  | 813    | 91954  | 6.1 | Uncharacterized protein                                                                                                                                                              |
| 2198                     | Q53ZP9           | 8                    | 20             | 17.8                  | 839    | 94505  | 5.9 | Heat shock protein apg-1                                                                                                                                                             |
| 2198                     | O95757           | 8                    | 20             | 17.8                  | 839    | 94512  | 5.9 | Heat shock 70 kDa protein 4L                                                                                                                                                         |
| 2198                     | B4DZRO           | 8                    | 20             | 17.2                  | 868    | 97562  | 5.8 | cDNA FLJ55529, highly similar to Heat shock 70 kDa protein 4L<br>cDNA FLJ58787, highly similar to Cleavage stimulation factor 64 kDa subunit                                         |
| 2199                     | B4DUD5           | 8                    | 28             | 18.3                  | 553    | 58618  | 6.8 | kDa subunit                                                                                                                                                                          |
| 2199                     | P33240-2         | 8                    | 28             | 18                    | 560    | 59251  | 6.8 | Isoform 2 of Cleavage stimulation factor subunit 2                                                                                                                                   |
| 2199                     | P33240           | 8                    | 28             | 17.5                  | 577    | 60959  | 6.8 | Cleavage stimulation factor subunit 2                                                                                                                                                |
| 2199                     | B3V096           | 8                    | 28             | 16.9                  | 597    | 62929  | 6.9 | BetaCstF-64 variant 2                                                                                                                                                                |
| 2199                     | E7EWR4           | 8                    | 28             | 16.9                  | 597    | 62943  | 6.9 | Uncharacterized protein                                                                                                                                                              |
| 2200                     | Q8WUI4-4         | 8                    | 9              | 17.2                  | 922    | 99755  | 7.5 | Isoform 4 of Histone deacetylase 7                                                                                                                                                   |
| 2200                     | Q8WUI4           | 8                    | 9              | 16.7                  | 952    | 102927 | 7.6 | Histone deacetylase 7                                                                                                                                                                |
| 2200                     | Q8WUI4-7         | 8                    | 9              | 16.7                  | 954    | 102906 | 7.3 | Isoform 7 of Histone deacetylase 7                                                                                                                                                   |
| 2200                     | Q8WUI4-5         | 8                    | 9              | 16                    | 991    | 106740 | 7.5 | Isoform 5 of Histone deacetylase 7                                                                                                                                                   |
| 2201                     | Q15582           | 8                    | 15             | 16.1                  | 683    | 74681  | 7.7 | Transforming growth factor-beta-induced protein ig-h3                                                                                                                                |
| 2201                     | Q53GU8           | 8                    | 15             | 16.1                  | 683    | 74651  | 7.7 | Transforming growth factor, beta-induced, 68kDa variant (Fragment)                                                                                                                   |
| 2202                     | E1B6W5           | 8                    | 17             | 57.1                  | 140    | 15079  | 8.9 | Uncharacterized protein                                                                                                                                                              |
| 2202                     | P22307-2         | 8                    | 17             | 55.9                  | 143    | 15401  | 8.9 | Isoform SCP2 of Non-specific lipid-transfer protein<br>cDNA FLJ53991, highly similar to Non-specific lipid-transfer protein (EC 2.3.1.176)                                           |
| 2202                     | B4DHP6           | 8                    | 17             | 17.2                  | 466    | 50342  | 7   | Uncharacterized protein                                                                                                                                                              |
| 2202                     | A6NM69           | 8                    | 17             | 15.9                  | 503    | 54415  | 6.7 | Uncharacterized protein                                                                                                                                                              |
| 2202                     | C9JC79           | 8                    | 17             | 15.3                  | 523    | 56497  | 6.9 | Uncharacterized protein<br>cDNA FLJ53982, highly similar to Nonspecific lipid-transfer protein (EC 2.3.1.176)                                                                        |
| 2202                     | B4DGJ9           | 8                    | 17             | 15.3                  | 523    | 56497  | 6.7 | Non-specific lipid-transfer protein                                                                                                                                                  |
| 2202                     | P22307           | 8                    | 17             | 14.6                  | 547    | 58994  | 6.9 | Non-specific lipid-transfer protein<br>cDNA, FLJ93299, highly similar to sapiens sterol carrier protein 2 (SCP2), mRNA                                                               |
| 2202                     | B2R761           | 8                    | 17             | 14.6                  | 547    | 59022  | 7   |                                                                                                                                                                                      |
| 2203                     | B4E2E1           | 8                    | 30             | 15.2                  | 867    | 96176  | 7.1 | cDNA FLJ54322, highly similar to Protein transport protein Sec24B                                                                                                                    |
| 2203                     | O95487-2         | 8                    | 30             | 10.7                  | 1233   | 133629 | 7.4 | Isoform 2 of Protein transport protein Sec24B                                                                                                                                        |
| 2203                     | O95487           | 8                    | 30             | 10.4                  | 1268   | 137417 | 6.7 | Protein transport protein Sec24B                                                                                                                                                     |
| 2203                     | B7ZKM8           | 8                    | 30             | 10.2                  | 1298   | 140421 | 6.6 | SEC24B protein                                                                                                                                                                       |
| 2204                     | Q14694           | 8                    | 14             | 15                    | 798    | 87134  | 5.3 | Ubiquitin carboxyl-terminal hydrolase 10                                                                                                                                             |
| 2204                     | UPI0001AE68C9    | 8                    | 14             | 15                    | 798    | 87228  | 5.3 | Ubiquitin carboxyl-terminal hydrolase 10 (EC 3.1.2.15) (Ubiquitin thioesterase 10) (Ubiquitin-specific-processing protease 10) (Deubiquitinating enzyme 10).                         |
| 2204                     | Q14694-3         | 8                    | 14             | 15                    | 802    | 87533  | 5.3 | Isoform 3 of Ubiquitin carboxyl-terminal hydrolase 10                                                                                                                                |
| 2204                     | Q14694-2         | 8                    | 14             | 14.2                  | 846    | 92597  | 5.7 | Isoform 2 of Ubiquitin carboxyl-terminal hydrolase 10                                                                                                                                |
| 2205                     | Q9BKB4           | 8                    | 20             | 14.2                  | 747    | 83643  | 7.1 | Oxysterol-binding protein-related protein 11                                                                                                                                         |
| 2206                     | Q9H1B7           | 8                    | 43             | 14.2                  | 796    | 82659  | 8.2 | Interferon regulatory factor 2-binding protein-like                                                                                                                                  |
| 2207                     | B2RCG8           | 8                    | 10             | 14.1                  | 686    | 76933  | 6.9 | cDNA, FLJ96063, highly similar to sapiens rhophilin, Rho GTPase binding protein 2 (RHPN2), mRNA                                                                                      |
| 2207                     | Q8IUC4           | 8                    | 10             | 14.1                  | 686    | 76993  | 6.8 | Rhophilin-2                                                                                                                                                                          |
| 2207                     | B3KUY8           | 8                    | 10             | 14.1                  | 686    | 77025  | 6.8 | cDNA FLJ40927 fis, clone UTERU2006593, highly similar to Rhophilin-2                                                                                                                 |
| 2208                     | P20936-2         | 8                    | 11             | 13.9                  | 870    | 100398 | 7.6 | Isoform 2 of Ras GTPase-activating protein 1                                                                                                                                         |
| 2208                     | B4DTL2           | 8                    | 11             | 13.8                  | 880    | 101546 | 7.8 | cDNA FLJ53191, highly similar to Ras GTPase-activating protein 1                                                                                                                     |
| 2208                     | E9PGC0           | 8                    | 11             | 13.7                  | 881    | 101790 | 7.8 | Uncharacterized protein                                                                                                                                                              |
| 2208                     | B4DTX4           | 8                    | 11             | 13.7                  | 881    | 101756 | 7.8 | cDNA FLJ59756, highly similar to Ras GTPase-activating protein 1                                                                                                                     |

Table S1. Proteins identified in the OVCAR-3 tumor supernatant by two or more unique peptides.

| Protein or Protein Group | Accession Number | Unique Peptide Count | Spectrum Count | Sequence Coverage (%) | Length | MolWt  | pI   | Descriptive Name                                                                                          |
|--------------------------|------------------|----------------------|----------------|-----------------------|--------|--------|------|-----------------------------------------------------------------------------------------------------------|
| 2208                     | P20936           | 8                    | 11             | 11.6                  | 1047   | 116403 | 6.5  | Ras GTPase-activating protein 1                                                                           |
| 2209                     | B0V0F8           | 8                    | 11             | 13.6                  | 669    | 76933  | 6.1  | DEAH (Asp-Glu-Ala-His) box polypeptide 16 (Fragment)                                                      |
| 2209                     | O60231           | 8                    | 11             | 8.7                   | 1041   | 119263 | 6.8  | Putative pre-mRNA-splicing factor ATP-dependent RNA helicase DHX16                                        |
| 2210                     | Q2NL82           | 8                    | 15             | 12.1                  | 804    | 91810  | 7.4  | Pre-rRNA-processing protein TSR1 log                                                                      |
| 2211                     | B7Z3E5           | 8                    | 13             | 11                    | 1039   | 119056 | 9.4  | cDNA FLJ53573, highly similar to Myosin lc                                                                |
| 2211                     | O00159-3         | 8                    | 13             | 10.9                  | 1044   | 119628 | 9.5  | Isoform 3 of Myosin-lc                                                                                    |
| 2211                     | O00159           | 8                    | 13             | 10.7                  | 1063   | 121682 | 9.4  | Myosin-lc                                                                                                 |
| 2212                     | Q5W7F7           | 8                    | 9              | 11.3                  | 852    | 97958  | 5.3  | Ubiquitin ligase E3A isoform 1                                                                            |
| 2212                     | Q05086           | 8                    | 9              | 11                    | 875    | 100688 | 5.2  | Ubiquitin-protein ligase E3A                                                                              |
| 2212                     | Q9BU16           | 8                    | 9              | 11                    | 872    | 100044 | 5.2  | Ubiquitin protein ligase E3A                                                                              |
| 2212                     | Q05086-3         | 8                    | 9              | 11                    | 872    | 100102 | 5.2  | Isoform III of Ubiquitin-protein ligase E3A                                                               |
| 2213                     | A2A2F0           | 8                    | 10             | 11.3                  | 1323   | 147389 | 6.8  | OTTHUMP00000178925 (Fragment)                                                                             |
| 2213                     | A2A2E9           | 8                    | 10             | 10.1                  | 1491   | 166527 | 6.7  | OTTHUMP00000030968                                                                                        |
| 2213                     | Q86X10-3         | 8                    | 10             | 10.1                  | 1490   | 166398 | 6.8  | Isoform 3 of Ral GTPase-activating protein subunit beta                                                   |
| 2213                     | Q86X10           | 8                    | 10             | 10                    | 1494   | 166798 | 6.8  | Ral GTPase-activating protein subunit beta                                                                |
| 2214                     | Q5T1M5           | 8                    | 33             | 10.1                  | 1219   | 133630 | 5.2  | FK506-binding protein 15                                                                                  |
| 2215                     | Q7ZZZ2-2         | 8                    | 12             | 9.8                   | 1069   | 119887 | 5.8  | Isoform 2 of Elongation factor Tu GTP-binding domain-containing protein 1                                 |
| 2215                     | Q7ZZZ2           | 8                    | 12             | 9.4                   | 1120   | 125430 | 5.9  | Elongation factor Tu GTP-binding domain-containing protein 1                                              |
| 2216                     | B3KY56           | 8                    | 37             | 9.2                   | 1058   | 117393 | 5.9  | cDNA FLJ46898 fis, clone UTERU3022168, highly similar to Protein FAM62A                                   |
| 2216                     | B3KMV5           | 8                    | 37             | 8.8                   | 1104   | 122905 | 5.8  | cDNA FLJ12728 fis, clone NT2RP2000040, highly similar to Protein FAM62A                                   |
| 2216                     | Q9BSJ8           | 8                    | 37             | 8.8                   | 1104   | 122856 | 5.8  | Extended synaptotagmin-1                                                                                  |
| 2216                     | Q9BSJ8-2         | 8                    | 37             | 8.7                   | 1114   | 124003 | 5.8  | Isoform 2 of Extended synaptotagmin-1                                                                     |
| 2217                     | UPI000022D624    | 8                    | 23             | 15.2                  | 604    | 67223  | 6.6  | epithelial splicing regulatory protein 1 isoform 5                                                        |
| 2217                     | Q6NXG1-2         | 8                    | 23             | 15.1                  | 608    | 67665  | 6.8  | Isoform 2 of Epithelial splicing regulatory protein 1                                                     |
| 2217                     | E9PB47           | 8                    | 23             | 14                    | 659    | 73133  | 6.8  | Uncharacterized protein                                                                                   |
| 2217                     | Q6NXG1-4         | 8                    | 23             | 13.9                  | 663    | 73574  | 6.9  | Isoform 4 of Epithelial splicing regulatory protein 1                                                     |
| 2217                     | Q6NXG1-3         | 8                    | 23             | 13.6                  | 677    | 75144  | 6.6  | Isoform 3 of Epithelial splicing regulatory protein 1                                                     |
| 2217                     | Q6NXG1           | 8                    | 23             | 13.5                  | 681    | 75585  | 6.7  | Epithelial splicing regulatory protein 1                                                                  |
| 2217                     | D7PBN3           | 8                    | 23             | 8.7                   | 1061   | 118616 | 8.2  | ESRP1/RAF1 fusion protein                                                                                 |
| 2218                     | E5KLM2           | 8                    | 11             | 8.6                   | 960    | 111657 | 7.9  | Mitochondrial dynamin-like 120 kDa protein                                                                |
| 2218                     | E5KLM1           | 8                    | 11             | 8.3                   | 997    | 115911 | 7.9  | Mitochondrial dynamin-like 120 kDa protein                                                                |
| 2219                     | B7ZM80           | 8                    | 8              | 8.1                   | 1051   | 116646 | 6.8  | Integrin, alpha 3 (Antigen CD49C, alpha 3 subunit of VLA-3 receptor)                                      |
| 2219                     | P26006-2         | 8                    | 8              | 8.1                   | 1051   | 116612 | 6.8  | Isoform Alpha-3A of Integrin alpha-3                                                                      |
| 2219                     | P26006           | 8                    | 8              | 8                     | 1066   | 118756 | 7    | Integrin alpha-3                                                                                          |
| 2220                     | O14981           | 8                    | 11             | 8                     | 1849   | 206886 | 6.5  | TATA-binding protein-associated factor 172                                                                |
| 2221                     | B7ZLDO           | 8                    | 8              | 7.3                   | 1568   | 175449 | 5.4  | LRP6 protein                                                                                              |
| 2221                     | Q75581           | 8                    | 8              | 7.1                   | 1613   | 180428 | 5.3  | Low-density lipoprotein receptor-related protein 6                                                        |
| 2222                     | Q9H1A4           | 8                    | 10             | 6.7                   | 1944   | 216498 | 6.3  | Anaphase-promoting complex subunit 1                                                                      |
| 2223                     | E0AD28           | 8                    | 11             | 5.4                   | 1829   | 208447 | 5.7  | T-Dicer                                                                                                   |
| 2223                     | Q9UPY3           | 8                    | 11             | 5.1                   | 1922   | 218680 | 5.7  | Endoribonuclease Dicer                                                                                    |
| 2224                     | E7EVK3           | 8                    | 8              | 5.3                   | 1917   | 216029 | 6.2  | Uncharacterized protein                                                                                   |
| 2224                     | Q6ZT12-4         | 8                    | 8              | 5.3                   | 1917   | 215969 | 6.2  | Isoform 4 of E3 ubiquitin-protein ligase UBR3                                                             |
| 2224                     | Q6ZT12           | 8                    | 8              | 5.3                   | 1888   | 212432 | 6.1  | E3 ubiquitin-protein ligase UBR3                                                                          |
| 2225                     | Q02388           | 8                    | 8              | 3.7                   | 2944   | 295216 | 6.3  | Collagen alpha-1(VII) chain                                                                               |
| 2225                     | Q02388-2         | 8                    | 8              | 3.7                   | 2912   | 292264 | 6.2  | Isoform 2 of Collagen alpha-1(VII) chain                                                                  |
| 2226                     | E7ERU0           | 8                    | 12             | 3.3                   | 5375   | 615661 | 5.7  | Uncharacterized protein                                                                                   |
| 2226                     | E9PBJ8           | 8                    | 12             | 3.3                   | 5497   | 629794 | 5.7  | Uncharacterized protein                                                                                   |
| 2226                     | E9PEB9           | 8                    | 12             | 3.2                   | 5675   | 649550 | 6    | Uncharacterized protein                                                                                   |
| 2226                     | Q03001           | 8                    | 12             | 2.4                   | 7570   | 860679 | 5.2  | Dystonin                                                                                                  |
| 2226                     | E9PBT7           | 8                    | 12             | 2.4                   | 7461   | 847987 | 5.2  | Uncharacterized protein                                                                                   |
| 2226                     | Q03001-11        | 8                    | 12             | 2.3                   | 7748   | 880435 | 5.4  | Isoform 6 of Dystonin                                                                                     |
| 2227                     | P62306           | 7                    | 100            | 88.4                  | 86     | 9725   | 4.7  | Small nuclear ribonucleoprotein F Small nuclear ribonucleoprotein F                                       |
| 2228                     | B2R4N3           | 7                    | 21             | 79.5                  | 73     | 8548   | 7.3  | cDNA, FLJ92155, highly similar to sapiens ubiquitin-like 5 (UBL5), mRNA                                   |
| 2228                     | Q9BZL1           | 7                    | 21             | 79.5                  | 73     | 8547   | 8.4  | Ubiquitin-like protein 5 Ubiquitin-like protein 5                                                         |
| 2229                     | C1J0L1           | 7                    | 131            | 67.2                  | 131    | 13977  | 10.4 | Ribosomal protein L23 (Fragment)                                                                          |
| 2229                     | P62829           | 7                    | 131            | 62.9                  | 140    | 14865  | 10.5 | 60S ribosomal protein L23 60S ribosomal protein L23                                                       |
| 2230                     | P62736           | 7                    | 274            | 66.3                  | 377    | 42009  | 5.4  | Actin, aortic smooth muscle Actin, aortic smooth muscle                                                   |
| 2230                     | Q9CXX3           | 7                    | 274            | 66.3                  | 377    | 41947  | 5.5  | Putative uncharacterized protein                                                                          |
| 2230                     | P68032           | 7                    | 274            | 66.3                  | 377    | 42019  | 5.4  | Actin, alpha cardiac muscle 1 Actin, alpha cardiac muscle 1                                               |
| 2231                     | O60493           | 7                    | 48             | 63.6                  | 162    | 18762  | 8.7  | Sorting nexin-3 Sorting nexin-3                                                                           |
| 2231                     | O70492           | 7                    | 48             | 63.6                  | 162    | 18757  | 8.7  | Sorting nexin-3                                                                                           |
| 2232                     | O60739           | 7                    | 58             | 61.1                  | 113    | 12824  | 7.4  | Eukaryotic translation initiation factor 1b Eukaryotic translation initiation factor 1b                   |
| 2233                     | P62244           | 7                    | 222            | 60                    | 130    | 14839  | 10.1 | 40S ribosomal protein S15a 40S ribosomal protein S15a                                                     |
| 2234                     | Q12974           | 7                    | 58             | 56.9                  | 167    | 19127  | 8.4  | Protein tyrosine phosphatase type IVA 2 Protein tyrosine phosphatase type IVA 2                           |
| 2235                     | Q969T4           | 7                    | 49             | 56                    | 207    | 22913  | 7.2  | Ubiquitin-conjugating enzyme E2 E3 Ubiquitin-conjugating enzyme E2 E3                                     |
| 2236                     | P62316           | 7                    | 138            | 55.9                  | 118    | 13527  | 9.9  | Small nuclear ribonucleoprotein Sm D2 Small nuclear ribonucleoprotein Sm D2                               |
| 2237                     | P25398           | 7                    | 136            | 54.5                  | 132    | 14515  | 7.2  | 40S ribosomal protein S12 40S ribosomal protein S12                                                       |
| 2237                     | UPI0000023CC7    | 7                    | 136            | 54.5                  | 132    | 14514  | 7.9  | PREDICTED: 40S ribosomal protein S12-like                                                                 |
| 2238                     | A8MZB2           | 7                    | 13             | 51.8                  | 166    | 18857  | 5    | N-acetyltransferase 5                                                                                     |
| 2238                     | P61599           | 7                    | 13             | 48.3                  | 178    | 20368  | 5    | N-alpha-acetyltransferase 20, NatB catalytic subunit N-alpha-acetyltransferase 20, NatB catalytic subunit |
| 2238                     | Q9DB82           | 7                    | 13             | 45.7                  | 188    | 21470  | 5.1  | N-acetyltransferase 5 (ARD1 log, S. cerevisiae)                                                           |
| 2239                     | P62380           | 7                    | 20             | 51.6                  | 186    | 20887  | 9.5  | TATA box-binding protein-like protein 1 TATA box-binding protein-like protein 1                           |
| 2240                     | P61018           | 7                    | 13             | 49.8                  | 213    | 23587  | 6    | Ras-related protein Rab-4B                                                                                |
| 2240                     | Q91ZR1           | 7                    | 13             | 49.8                  | 213    | 23629  | 6    | Ras-related protein Rab-4B                                                                                |
| 2240                     | P61018-2         | 7                    | 13             | 42.7                  | 248    | 27506  | 6.4  | Isoform 2 of Ras-related protein Rab-4B                                                                   |
| 2241                     | C9J7T6           | 7                    | 104            | 49.7                  | 163    | 18592  | 10   | Uncharacterized protein Uncharacterized protein                                                           |
| 2242                     | A0JLV3           | 7                    | 118            | 48.8                  | 123    | 13579  | 10.4 | Histone H2B (Fragment)                                                                                    |
| 2242                     | Q99880           | 7                    | 118            | 47.6                  | 126    | 13952  | 10.3 | Histone H2B type 1-L                                                                                      |
| 2242                     | Q99879           | 7                    | 118            | 47.6                  | 126    | 13989  | 10.3 | Histone H2B type 1-M                                                                                      |
| 2242                     | Q99877           | 7                    | 118            | 47.6                  | 126    | 13922  | 10.3 | Histone H2B type 1-N                                                                                      |
| 2242                     | Q93079           | 7                    | 118            | 47.6                  | 126    | 13892  | 10.3 | Histone H2B type 1-H                                                                                      |
| 2242                     | Q8CGP2           | 7                    | 118            | 47.6                  | 126    | 13992  | 10.3 | Histone H2B type 1-P                                                                                      |
| 2242                     | Q8CGP1           | 7                    | 118            | 47.6                  | 126    | 13920  | 10.3 | Histone H2B type 1-K                                                                                      |
| 2242                     | Q64478           | 7                    | 118            | 47.6                  | 126    | 13920  | 10.3 | Histone H2B type 1-H                                                                                      |
| 2242                     | Q64475           | 7                    | 118            | 47.6                  | 126    | 13952  | 10.3 | Histone H2B type 1-B                                                                                      |
| 2242                     | Q5QNW6           | 7                    | 118            | 47.6                  | 126    | 13920  | 10.3 | Histone H2B type 2-F Histone H2B type 2-F                                                                 |
| 2242                     | P62807           | 7                    | 118            | 47.6                  | 126    | 13906  | 10.3 | Histone H2B type 1-C/E/F/G/I Histone H2B type 1-C/E/F/G/I                                                 |
| 2242                     | P58876           | 7                    | 118            | 47.6                  | 126    | 13936  | 10.3 | Histone H2B type 1-D Histone H2B type 1-D                                                                 |
| 2242                     | P57053           | 7                    | 118            | 47.6                  | 126    | 13944  | 10.4 | Histone H2B type F-S                                                                                      |
| 2242                     | P10853           | 7                    | 118            | 47.6                  | 126    | 13936  | 10.3 | Histone H2B type 1-F/J/L                                                                                  |

Table S1. Proteins identified in the OVCAR-3 tumor supernatant by two or more unique peptides.

| Protein or Group | Accession Number | Unique Peptide Count | Spectrum Count | Sequence Coverage (%) | Length | MolWt | pI   | Descriptive Name                                                                                                             |
|------------------|------------------|----------------------|----------------|-----------------------|--------|-------|------|------------------------------------------------------------------------------------------------------------------------------|
| 2242             | O60814           | 7                    | 118            | 47.6                  | 126    | 13890 | 10.3 | Histone H2B type 1-K                                                                                                         |
| 2242             | A8K9J7           | 7                    | 118            | 47.6                  | 126    | 13996 | 10.3 | Histone H2B                                                                                                                  |
| 2242             | Q8CBB6           | 7                    | 118            | 44.8                  | 134    | 14888 | 10.4 | Histone H2B                                                                                                                  |
| 2242             | Q921L4           | 7                    | 118            | 44.4                  | 135    | 14939 | 10.1 | Histone H2B                                                                                                                  |
| 2242             | B4DR52           | 7                    | 118            | 36.1                  | 166    | 18041 | 10.3 | Histone H2B                                                                                                                  |
| 2243             | P11233           | 7                    | 23             | 46.1                  | 206    | 23567 | 7.1  | Ras-related protein Ral-A                                                                                                    |
| 2243             | P63321           | 7                    | 23             | 46.1                  | 206    | 23553 | 7.1  | Ras-related protein Ral-A                                                                                                    |
| 2244             | P53680           | 7                    | 77             | 44.4                  | 142    | 17018 | 6.2  | AP-2 complex subunit sigma AP-2 complex subunit sigma<br>NEDD8-conjugating enzyme Ubc12 NEDD8-conjugating enzyme             |
| 2245             | P61081           | 7                    | 46             | 42.1                  | 183    | 20900 | 7.7  | Ubc12                                                                                                                        |
| 2246             | Q16629-3         | 7                    | 56             | 51.5                  | 132    | 15257 | 9.6  | Isoform 3 of Serine/arginine-rich splicing factor 7                                                                          |
| 2246             | Q16629-2         | 7                    | 56             | 50.4                  | 135    | 15573 | 9.8  | Isoform 2 of Serine/arginine-rich splicing factor 7                                                                          |
| 2246             | UPI000013D48B    | 7                    | 56             | 49.6                  | 137    | 15763 | 9.8  | UPI000013D48B UniRef100 entry                                                                                                |
| 2246             | Q8BL97-3         | 7                    | 56             | 43.3                  | 157    | 17890 | 9.5  | Isoform 3 of Serine/arginine-rich splicing factor 7                                                                          |
| 2246             | A6NNE8           | 7                    | 56             | 41.2                  | 165    | 18841 | 10.6 | Uncharacterized protein<br>cDNA FLJ59182, highly similar to Splicing factor, arginine/serine-rich 7                          |
| 2246             | B4DEK2           | 7                    | 56             | 41.2                  | 165    | 18815 | 10.7 | serine/arginine-rich splicing factor 7 isoform 4                                                                             |
| 2246             | UPI0001E24E1A    | 7                    | 56             | 30.5                  | 223    | 25584 | 11.8 | serine/arginine-rich splicing factor 7 isoform 2                                                                             |
| 2246             | UPI0000EE2586    | 7                    | 56             | 30.1                  | 226    | 26012 | 11.8 | RCG61762, isoform CRA_e                                                                                                      |
| 2246             | D3Z964           | 7                    | 56             | 30.1                  | 226    | 26023 | 11.8 | serine/arginine-rich splicing factor 7 isoform 3                                                                             |
| 2246             | UPI0000506E2B    | 7                    | 56             | 30                    | 227    | 26181 | 11.8 | Uncharacterized protein                                                                                                      |
| 2246             | C9JAB2           | 7                    | 56             | 28.9                  | 235    | 26928 | 11.9 | MCG17902, isoform CRA_a                                                                                                      |
| 2246             | Q3THA6           | 7                    | 56             | 28.6                  | 238    | 27378 | 11.8 | Serine/arginine-rich splicing factor 7                                                                                       |
| 2246             | Q16629           | 7                    | 56             | 28.6                  | 238    | 27367 | 11.8 | Uncharacterized protein                                                                                                      |
| 2246             | E9QK40           | 7                    | 56             | 25.6                  | 266    | 30704 | 11.9 | Serine/arginine-rich splicing factor 7                                                                                       |
| 2246             | Q8BL97           | 7                    | 56             | 25.5                  | 267    | 30818 | 11.9 | Uncharacterized protein                                                                                                      |
| 2247             | Q52KF0           | 7                    | 11             | 40.3                  | 149    | 17020 | 6.3  | Thioredoxin-like 4B                                                                                                          |
| 2247             | Q9NX01           | 7                    | 11             | 40.3                  | 149    | 17015 | 6    | Thioredoxin-like protein 4B                                                                                                  |
| 2247             | Q53GP2           | 7                    | 11             | 40.3                  | 149    | 16989 | 6.3  | Thioredoxin-like 4B variant (Fragment)                                                                                       |
| 2248             | Q8BPG5           | 7                    | 56             | 43.8                  | 192    | 21424 | 8.5  | Putative uncharacterized protein<br>Ras-related C3 botulinum toxin substrate 1 Ras-related C3<br>botulinum toxin substrate 1 |
| 2248             | P63000           | 7                    | 56             | 43.8                  | 192    | 21450 | 8.5  | Ras-related C3 botulinum toxin substrate 1 (Rho family, small GTP binding protein Rac1)                                      |
| 2248             | A4D2P0           | 7                    | 56             | 39.8                  | 211    | 23467 | 8.6  | RAS-related C3 botulinum substrate 1, isoform CRA_a                                                                          |
| 2248             | Q3TLP8           | 7                    | 56             | 39.8                  | 211    | 23432 | 8.7  | Ras-related protein R-Ras2 Ras-related protein R-Ras2                                                                        |
| 2249             | P62070           | 7                    | 15             | 39.7                  | 204    | 23400 | 6    | cDNA FLJ61162, highly similar to Ras-related protein R-Ras2                                                                  |
| 2249             | B7Z5Z2           | 7                    | 15             | 38.6                  | 210    | 24196 | 6    | Ubiquitin-conjugating enzyme E2 R2 Ubiquitin-conjugating enzyme E2 R2                                                        |
| 2250             | Q712K3           | 7                    | 14             | 37.4                  | 238    | 27166 | 4.4  | Ubiquitin-conjugating enzyme E2 H Ubiquitin-conjugating enzyme E2 H                                                          |
| 2251             | P62256           | 7                    | 36             | 36.1                  | 183    | 20655 | 4.7  | Chromosome 11 open reading frame 8 variant (Fragment)                                                                        |
| 2252             | Q59GE6           | 7                    | 10             | 37.5                  | 280    | 31777 | 7.6  | Metallophosphoesterase MPPED2                                                                                                |
| 2252             | Q15777           | 7                    | 10             | 35.7                  | 294    | 33360 | 6.3  | Metallophosphoesterase MPPED2                                                                                                |
| 2252             | Q9CZJ0           | 7                    | 10             | 35.7                  | 294    | 33374 | 6.3  | Uncharacterized protein                                                                                                      |
| 2253             | C9JB30           | 7                    | 24             | 31.2                  | 218    | 24582 | 9    | Isoform 2 of Microtubule-associated protein RP/EB family member 3                                                            |
| 2253             | Q9UPY8-2         | 7                    | 24             | 25.6                  | 266    | 30380 | 5.3  | Uncharacterized protein                                                                                                      |
| 2253             | D3Z6G3           | 7                    | 24             | 25.6                  | 266    | 30364 | 5.3  | Microtubule-associated protein RP/EB family member 3                                                                         |
| 2253             | Q9UPY8           | 7                    | 24             | 24.2                  | 281    | 31982 | 5.5  | Microtubule-associated protein RP/EB family member 3                                                                         |
| 2253             | Q6PER3           | 7                    | 24             | 24.2                  | 281    | 31966 | 5.5  | Phosphoribosyl pyrophosphate synthase-associated protein 1                                                                   |
| 2254             | Q14558           | 7                    | 9              | 29.2                  | 356    | 39394 | 7.2  | Phosphoribosyl pyrophosphate synthase-associated protein 1                                                                   |
| 2254             | Q9D0M1           | 7                    | 9              | 29.2                  | 356    | 39432 | 7.2  | Isoform 2 of Phosphoribosyl pyrophosphate synthase-associated protein 1                                                      |
| 2254             | Q14558-2         | 7                    | 9              | 27                    | 385    | 42468 | 8.5  | Putative uncharacterized protein                                                                                             |
| 2255             | Q3UF75           | 7                    | 13             | 28.9                  | 336    | 38361 | 5.1  | Alpha-parvin                                                                                                                 |
| 2255             | Q9NVD7           | 7                    | 13             | 26.1                  | 372    | 42244 | 5.9  | Putative uncharacterized protein                                                                                             |
| 2255             | Q9EPC1           | 7                    | 13             | 26.1                  | 372    | 42330 | 5.9  | Putative uncharacterized protein                                                                                             |
| 2255             | Q8C5R4           | 7                    | 13             | 26.1                  | 372    | 42330 | 6.1  | alpha-parvin                                                                                                                 |
| 2255             | UPI0000EE3866    | 7                    | 13             | 23.5                  | 412    | 46590 | 8.4  | Protein FAM50A                                                                                                               |
| 2256             | Q14320           | 7                    | 22             | 25.7                  | 339    | 40242 | 6.8  | Protein FAM50A                                                                                                               |
| 2256             | Q9VW03           | 7                    | 22             | 25.7                  | 339    | 40252 | 6.8  | LIM and senescent cell antigen-like-containing domain protein 1                                                              |
| 2257             | Q9VJW4           | 7                    | 13             | 27.4                  | 325    | 37240 | 8    | LIM and senescent cell antigen-like-containing domain protein 1                                                              |
| 2257             | P48059           | 7                    | 13             | 27.4                  | 325    | 37251 | 8    | cDNA FLJ55516, highly similar to Particularly interesting new Cys-His protein                                                |
| 2257             | B7Z483           | 7                    | 13             | 26.4                  | 337    | 38422 | 8    | LIM and senescent cell antigen-like-containing domain protein 1 isoform D                                                    |
| 2257             | A8CVP1           | 7                    | 13             | 24.6                  | 362    | 41608 | 8    | cDNA FLJ55509, highly similar to Particularly interesting new Cys-His protein                                                |
| 2257             | B7Z907           | 7                    | 13             | 24.6                  | 362    | 41571 | 8.1  | Lims E protein                                                                                                               |
| 2257             | Q4ZJB3           | 7                    | 13             | 23                    | 387    | 44341 | 7.8  | Uncharacterized protein                                                                                                      |
| 2257             | E9QP62           | 7                    | 13             | 23                    | 387    | 44340 | 7.9  | cDNA FLJ55165, highly similar to Particularly interesting new Cys-His protein                                                |
| 2257             | B7Z7R3           | 7                    | 13             | 23                    | 387    | 44390 | 8    | Isoform 2 of Paraspeckle component 1                                                                                         |
| 2258             | Q8WXF1-2         | 7                    | 10             | 24.9                  | 393    | 45571 | 6.6  | cDNA FLJ57805, highly similar to sapiens paraspeckle component 1 (PSPC1), transcript variant alpha, mRNA                     |
| 2258             | B4DWI8           | 7                    | 10             | 21.2                  | 463    | 52580 | 7.3  | Isoform 2 of Paraspeckle component 1                                                                                         |
| 2258             | Q8R326-2         | 7                    | 10             | 21                    | 466    | 53022 | 6.1  | Paraspeckle component 1                                                                                                      |
| 2258             | Q8WXF1           | 7                    | 10             | 18.7                  | 523    | 58744 | 6.7  | Paraspeckle component 1                                                                                                      |
| 2258             | Q8R326           | 7                    | 10             | 18.7                  | 523    | 58758 | 6.7  | Paraspeckle component 1                                                                                                      |
| 2259             | Q8VH51-3         | 7                    | 34             | 28.3                  | 367    | 39905 | 6.8  | Isoform 3 of RNA-binding protein 39                                                                                          |
| 2259             | Q0VGU9           | 7                    | 34             | 28.3                  | 367    | 39818 | 6.6  | Rbm39 protein Rbm39 protein                                                                                                  |
| 2259             | Q7Z3L0           | 7                    | 34             | 27.9                  | 373    | 40469 | 6.6  | Putative uncharacterized protein DKFZp7811140                                                                                |
| 2259             | E1P5S2           | 7                    | 34             | 27.9                  | 373    | 40541 | 6.3  | RNA-binding region (RNP1, RRM) containing 2, isoform CRA_b                                                                   |
| 2259             | E9PCZ6           | 7                    | 34             | 20.8                  | 499    | 55960 | 10.3 | Uncharacterized protein<br>cDNA FLJ58459, highly similar to RNA-binding region-containing protein 2                          |
| 2259             | B4DRA0           | 7                    | 34             | 20.7                  | 502    | 56411 | 10   | cDNA FLJ60296, highly similar to RNA-binding region-containing protein 2                                                     |
| 2259             | B4DLM0           | 7                    | 34             | 20.7                  | 503    | 56333 | 10.4 | cDNA FLJ44170 fis, clone THYMU2035319, highly similar to RNA-binding region-containing protein 2                             |
| 2259             | B3KWX7           | 7                    | 34             | 20.6                  | 506    | 56744 | 10.4 | RBM39 protein                                                                                                                |
| 2259             | A2RRD3           | 7                    | 34             | 20.5                  | 508    | 57090 | 10   | Putative uncharacterized protein DKFZp781C0423 (Fragment)                                                                    |
| 2259             | Q68DD9           | 7                    | 34             | 20.3                  | 513    | 57444 | 10.3 | Isoform 2 of RNA-binding protein 39                                                                                          |
| 2259             | Q8VH51-2         | 7                    | 34             | 19.8                  | 524    | 58771 | 10.2 | RNA-binding protein 39                                                                                                       |
| 2259             | Q5RC80           | 7                    | 34             | 19.8                  | 524    | 58657 | 10.1 | RNA-binding motif protein 39                                                                                                 |
| 2259             | Q5BJP4           | 7                    | 34             | 19.8                  | 524    | 58684 | 10.1 | RNA-binding protein 39                                                                                                       |
| 2259             | Q8VH51           | 7                    | 34             | 19.6                  | 530    | 59494 | 10.1 | Putative uncharacterized protein                                                                                             |
| 2259             | Q5RJ10           | 7                    | 34             | 19.6                  | 530    | 59407 | 10.1 | RNA-binding protein 39                                                                                                       |
| 2259             | Q14498           | 7                    | 34             | 19.6                  | 530    | 59380 | 10.1 | cDNA FLJ57877, highly similar to Cleavage and polyadenylation specificity factor 7                                           |
| 2260             | B4DGF8           | 7                    | 55             | 19.5                  | 462    | 51106 | 7.8  | Isoform 2 of Cleavage and polyadenylation specificity factor subunit 7                                                       |
| 2260             | Q8N684-2         | 7                    | 55             | 19.5                  | 462    | 51096 | 7.8  | Isoform 2 of Cleavage and polyadenylation specificity factor subunit 7                                                       |
| 2260             | Q8BTV2-2         | 7                    | 55             | 19.5                  | 462    | 51057 | 7.8  | Isoform 2 of Cleavage and polyadenylation specificity factor subunit 7                                                       |

Table S1. Proteins identified in the OVCAR-3 tumor supernatant by two or more unique peptides.

| Protein or Group | Accession Number | Unique Peptide Count | Spectrum Count | Sequence Coverage (%) | Length | MolWt  | pI  | Descriptive Name                                                                                                 |
|------------------|------------------|----------------------|----------------|-----------------------|--------|--------|-----|------------------------------------------------------------------------------------------------------------------|
| 2260             | Q8N684           | 7                    | 55             | 19.1                  | 471    | 52050  | 8   | Cleavage and polyadenylation specificity factor subunit 7                                                        |
| 2260             | Q8BTV2           | 7                    | 55             | 19.1                  | 471    | 52011  | 8   | Cleavage and polyadenylation specificity factor subunit 7                                                        |
| 2260             | Q8N684-3         | 7                    | 55             | 17.5                  | 514    | 56375  | 8.9 | Isoform 3 of Cleavage and polyadenylation specificity factor subunit 7                                           |
| 2261             | Q96I25           | 7                    | 16             | 18.7                  | 401    | 44962  | 6   | Splicing factor 45                                                                                               |
| 2261             | Q8JZX4           | 7                    | 16             | 18.5                  | 405    | 45304  | 5.8 | Splicing factor 45                                                                                               |
| 2262             | P56545           | 7                    | 12             | 18.2                  | 445    | 48945  | 6.9 | C-terminal-binding protein 2                                                                                     |
| 2262             | Q3UIX8           | 7                    | 12             | 18.2                  | 445    | 48958  | 6.8 | Putative uncharacterized protein                                                                                 |
| 2262             | P56546           | 7                    | 12             | 18.2                  | 445    | 48957  | 6.9 | C-terminal-binding protein 2                                                                                     |
| 2262             | Q8IY44           | 7                    | 12             | 15.8                  | 513    | 56201  | 7.1 | CTBP2 protein                                                                                                    |
| 2262             | Q5SQP8           | 7                    | 12             | 15.8                  | 513    | 56102  | 7   | C-terminal binding protein 2                                                                                     |
| 2262             | P56546-2         | 7                    | 12             | 8.2                   | 988    | 107126 | 7.6 | Isoform 2 of C-terminal-binding protein 2                                                                        |
| 2262             | P56545-2         | 7                    | 12             | 8.2                   | 985    | 106187 | 8   | Isoform 2 of C-terminal-binding protein 2                                                                        |
| 2263             | O55222           | 7                    | 11             | 17.5                  | 452    | 51373  | 8.1 | Integrin-linked protein kinase                                                                                   |
| 2263             | Q13418           | 7                    | 11             | 17.5                  | 452    | 51419  | 8.1 | Integrin-linked protein kinase                                                                                   |
| 2264             | E9QMP5           | 7                    | 15             | 17.1                  | 451    | 52456  | 6.3 | Uncharacterized protein                                                                                          |
| 2264             | Q8BS26           | 7                    | 15             | 17                    | 452    | 52619  | 6.3 | Putative uncharacterized protein                                                                                 |
| 2264             | B3KVH4           | 7                    | 15             | 16                    | 480    | 55629  | 6.1 | cDNA FLJ16549 fis, clone PLACE7003657, highly similar to RAC-alpha serine/threonine-protein kinase (EC 2.7.11.1) |
| 2264             | P31749           | 7                    | 15             | 16                    | 480    | 55686  | 6.1 | RAC-alpha serine/threonine-protein kinase                                                                        |
| 2264             | UPI0001553571    | 7                    | 15             | 15.8                  | 488    | 56393  | 6.3 | RAC-alpha serine/threonine-protein kinase isoform 2                                                              |
| 2264             | P31748           | 7                    | 15             | 15.4                  | 501    | 57870  | 5.7 | AKT kinase-transforming protein                                                                                  |
| 2265             | P52594-2         | 7                    | 17             | 12.8                  | 522    | 54182  | 8.9 | Isoform 2 of Arf-GAP domain and FG repeats-containing protein 1                                                  |
| 2265             | Q8K2K6-3         | 7                    | 17             | 12.6                  | 530    | 55068  | 8.5 | Isoform 3 of Arf-GAP domain and FG repeats-containing protein 1                                                  |
| 2265             | Q8K2K6-2         | 7                    | 17             | 12.4                  | 540    | 56196  | 8.7 | Isoform 2 of Arf-GAP domain and FG repeats-containing protein 1                                                  |
| 2265             | B8ZZY2           | 7                    | 17             | 12.4                  | 541    | 56413  | 8.6 | Uncharacterized protein                                                                                          |
| 2265             | Q8K2K6-1         | 7                    | 17             | 12                    | 559    | 57915  | 8.6 | Isoform 1 of Arf-GAP domain and FG repeats-containing protein 1                                                  |
| 2265             | P52594-3         | 7                    | 17             | 12                    | 560    | 58132  | 8.6 | Isoform 3 of Arf-GAP domain and FG repeats-containing protein 1                                                  |
| 2265             | Q8K2K6           | 7                    | 17             | 11.9                  | 561    | 58043  | 8.6 | Arf-GAP domain and FG repeats-containing protein 1                                                               |
| 2265             | P52594           | 7                    | 17             | 11.9                  | 562    | 58260  | 8.6 | Arf-GAP domain and FG repeats-containing protein 1                                                               |
| 2265             | B3KUL1           | 7                    | 17             | 11.8                  | 569    | 58970  | 8   | cDNA FLJ40132 fis, clone TESTI2012155, highly similar to NUCLEOPORIN-LIKE PROTEIN RIP                            |
| 2265             | E9PHX7           | 7                    | 17             | 11.5                  | 584    | 60767  | 8.6 | Uncharacterized protein                                                                                          |
| 2266             | B7ZKY2           | 7                    | 7              | 10.3                  | 897    | 102084 | 6.4 | Calcium/calmodulin-dependent serine protein kinase (MAGUK family)                                                |
| 2266             | O70589-3         | 7                    | 7              | 10.3                  | 897    | 102099 | 6.4 | Isoform 3 of Peripheral plasma membrane protein CASK                                                             |
| 2266             | O14936-3         | 7                    | 7              | 10.3                  | 897    | 102114 | 6.4 | Isoform 3 of Peripheral plasma membrane protein CASK                                                             |
| 2266             | O70589-4         | 7                    | 7              | 10.1                  | 908    | 103145 | 6.4 | Isoform 4 of Peripheral plasma membrane protein CASK                                                             |
| 2266             | O70589-5         | 7                    | 7              | 10                    | 920    | 104455 | 6.4 | Isoform 5 of Peripheral plasma membrane protein CASK                                                             |
| 2266             | B7ZP42           | 7                    | 7              | 10                    | 920    | 104445 | 6.4 | Cask protein                                                                                                     |
| 2266             | O70589           | 7                    | 7              | 9.9                   | 926    | 105109 | 6.4 | Peripheral plasma membrane protein CASK                                                                          |
| 2266             | O14936           | 7                    | 7              | 9.9                   | 926    | 105123 | 6.4 | Peripheral plasma membrane protein CASK                                                                          |
| 2266             | E9QK70           | 7                    | 7              | 9.9                   | 926    | 105186 | 6.3 | Uncharacterized protein                                                                                          |
| 2267             | Q96Q05-3         | 7                    | 8              | 6.1                   | 1139   | 127607 | 6.7 | Isoform 3 of Trafficking protein particle complex subunit 9                                                      |
| 2267             | Q3U0M1-2         | 7                    | 8              | 6.1                   | 1139   | 127308 | 6.6 | Isoform 2 of Trafficking protein particle complex subunit 9                                                      |
| 2267             | Q96Q05           | 7                    | 8              | 6                     | 1148   | 128530 | 6.6 | Trafficking protein particle complex subunit 9                                                                   |
| 2267             | Q3U0M1           | 7                    | 8              | 6                     | 1148   | 128231 | 6.5 | Trafficking protein particle complex subunit 9                                                                   |
| 2267             | A6NIF0           | 7                    | 8              | 5.5                   | 1258   | 140671 | 7.3 | Uncharacterized protein                                                                                          |
| 2268             | Q9JHS3           | 7                    | 47             | 90.4                  | 125    | 13480  | 5.4 | Regulator complex protein LAMTOR2                                                                                |
| 2269             | P70349           | 7                    | 21             | 77.8                  | 126    | 13777  | 6.9 | Histidine triad nucleotide-binding protein 1                                                                     |
| 2270             | D3YDY5           | 7                    | 30             | 73.4                  | 124    | 13723  | 7.9 | Uncharacterized protein                                                                                          |
| 2271             | Q35215           | 7                    | 14             | 72.9                  | 118    | 13077  | 6.5 | D-dopachrome decarboxylase                                                                                       |
| 2272             | O88653           | 7                    | 19             | 71.8                  | 124    | 13553  | 7.3 | Regulator complex protein LAMTOR3                                                                                |
| 2272             | UPI0000608A6F    | 7                    | 19             | 71.8                  | 124    | 13569  | 6.5 | PREDICTED: mitogen-activated protein kinase scaffold protein 1-like                                              |
| 2273             | P16045           | 7                    | 320            | 70.4                  | 135    | 14866  | 5.5 | Galectin-1                                                                                                       |
| 2274             | P43025           | 7                    | 18             | 61.4                  | 202    | 22257  | 5.6 | Tetranectin                                                                                                      |
| 2274             | Q8CFZ6           | 7                    | 18             | 61.4                  | 202    | 22255  | 5.6 | C-type lectin domain family 3, member b                                                                          |
| 2275             | Q921E2           | 7                    | 11             | 61.3                  | 194    | 21331  | 7.4 | Ras-related protein Rab-31                                                                                       |
| 2276             | P48024           | 7                    | 29             | 61.1                  | 113    | 12747  | 7.5 | Eukaryotic translation initiation factor 1                                                                       |
| 2277             | Q3UC76           | 7                    | 15             | 60.4                  | 144    | 16475  | 5.2 | Putative uncharacterized protein                                                                                 |
| 2277             | Q60872           | 7                    | 15             | 60.4                  | 144    | 16502  | 5.2 | Eukaryotic translation initiation factor 1A                                                                      |
| 2278             | Q9CQU0           | 7                    | 19             | 59.4                  | 170    | 19049  | 5.3 | Thioredoxin domain-containing protein 12                                                                         |
| 2279             | D3YWR7           | 7                    | 16             | 59.3                  | 189    | 20008  | 6.9 | Uncharacterized protein                                                                                          |
| 2279             | Q8BVI4           | 7                    | 16             | 46.5                  | 241    | 25570  | 7.8 | Dihydropteridine reductase                                                                                       |
| 2280             | P34022           | 7                    | 25             | 57.1                  | 203    | 23596  | 5.2 | Ran-specific GTPase-activating protein                                                                           |
| 2280             | Q3U6M5           | 7                    | 25             | 57.1                  | 203    | 23497  | 5.2 | Putative uncharacterized protein                                                                                 |
| 2281             | P04117           | 7                    | 32             | 55.3                  | 132    | 14650  | 8.4 | Fatty acid-binding protein, adipocyte                                                                            |
| 2282             | D3YZL9           | 7                    | 64             | 53                    | 132    | 14489  | 7.9 | 40S ribosomal protein S12                                                                                        |
| 2282             | UPI000024EED0    | 7                    | 64             | 53                    | 132    | 14490  | 7.2 | PREDICTED: 40S ribosomal protein S12-like                                                                        |
| 2282             | UPI0000022171    | 7                    | 64             | 53                    | 132    | 14504  | 7.2 | PREDICTED: 40S ribosomal protein S12-like isoform 1                                                              |
| 2283             | P31532           | 7                    | 10             | 52.3                  | 130    | 15088  | 9.3 | Serum amyloid A-4 protein                                                                                        |
| 2284             | A2A9X5           | 7                    | 20             | 50.5                  | 194    | 21939  | 5.3 | 5'-3'-nucleotidase, cytosolic                                                                                    |
| 2284             | Q9JM14           | 7                    | 20             | 49                    | 200    | 23076  | 5.5 | 5'(3)-deoxyribonucleotidase, cytosolic type                                                                      |
| 2285             | D3Z125           | 7                    | 48             | 50.3                  | 179    | 19417  | 5.1 | Uncharacterized protein                                                                                          |
| 2285             | E9PUA7           | 7                    | 48             | 46.4                  | 194    | 21134  | 5   | Uncharacterized protein                                                                                          |
| 2285             | Q62393-3         | 7                    | 48             | 45.2                  | 199    | 21654  | 5   | Isoform 3 of Tumor protein D52                                                                                   |
| 2285             | D3Z7X7           | 7                    | 48             | 43.7                  | 206    | 22562  | 5.5 | Uncharacterized protein                                                                                          |
| 2285             | Q62393           | 7                    | 48             | 40.2                  | 224    | 24313  | 4.7 | Tumor protein D52                                                                                                |
| 2285             | E9QMB6           | 7                    | 48             | 36.4                  | 247    | 26927  | 5   | Uncharacterized protein                                                                                          |
| 2286             | P63028           | 7                    | 60             | 50                    | 172    | 19462  | 4.9 | Translationally-controlled tumor protein                                                                         |
| 2287             | P12246           | 7                    | 12             | 48.7                  | 224    | 26247  | 6.4 | Serum amyloid P-component                                                                                        |
| 2288             | Q07813           | 7                    | 10             | 48.4                  | 192    | 21395  | 5   | Apoptosis regulator BAX                                                                                          |
| 2289             | Q9DAC2           | 7                    | 15             | 57.1                  | 168    | 18946  | 8.3 | Complement component 8, gamma subunit                                                                            |
| 2289             | Q8VCG4           | 7                    | 15             | 47.5                  | 202    | 22508  | 9.2 | Complement component C8 gamma chain                                                                              |
| 2290             | O55135           | 7                    | 31             | 46.9                  | 245    | 26511  | 4.7 | Eukaryotic translation initiation factor 6                                                                       |
| 2290             | Q9R071           | 7                    | 31             | 46.9                  | 245    | 26541  | 4.7 | B4 integrin interactor homolog                                                                                   |
| 2290             | Q3UA13           | 7                    | 31             | 46.9                  | 245    | 26543  | 4.7 | Putative uncharacterized protein                                                                                 |
| 2290             | Q3U818           | 7                    | 31             | 46.9                  | 245    | 26451  | 4.7 | Putative uncharacterized protein                                                                                 |
| 2291             | D3Z315           | 7                    | 12             | 45.8                  | 227    | 25370  | 4.7 | Uncharacterized protein                                                                                          |
| 2291             | Q9D1J2           | 7                    | 12             | 33.8                  | 308    | 34557  | 5.1 | Putative uncharacterized protein                                                                                 |
| 2291             | O89079           | 7                    | 12             | 33.8                  | 308    | 34567  | 5.1 | Coatomer subunit epsilon                                                                                         |
| 2292             | P46412           | 7                    | 48             | 41.6                  | 226    | 25274  | 8.2 | Glutathione peroxidase 3                                                                                         |
| 2293             | P14901           | 7                    | 15             | 38.8                  | 289    | 32929  | 6.5 | Heme oxygenase 1                                                                                                 |
| 2294             | O09131           | 7                    | 17             | 37.1                  | 240    | 27498  | 7.4 | Glutathione S-transferase omega-1                                                                                |
| 2295             | Q3TG45           | 7                    | 20             | 35.6                  | 253    | 28526  | 6.8 | Putative uncharacterized protein                                                                                 |
| 2295             | Q99JB5           | 7                    | 20             | 35                    | 257    | 29939  | 6.4 | Proteasome (Prosome, macropain) 26S subunit, non-ATPase, 8                                                       |
| 2295             | Q9CP55           | 7                    | 20             | 31.1                  | 289    | 32769  | 6.4 | Putative uncharacterized protein                                                                                 |
| 2295             | Q8BKP5           | 7                    | 20             | 31.1                  | 289    | 32709  | 6.4 | Putative uncharacterized protein                                                                                 |



Table S1. Proteins identified in the OVCAR-3 tumor supernatant by two or more unique peptides.

| Protein or Protein Group | Accession Number | Unique Peptide Count | Spectrum Count | Sequence Coverage (%) | Length | MolWt  | pI   | Descriptive Name                                                                      |
|--------------------------|------------------|----------------------|----------------|-----------------------|--------|--------|------|---------------------------------------------------------------------------------------|
| 2295                     | Q3TVY0           | 7                    | 20             | 29.3                  | 307    | 34827  | 8.9  | Putative uncharacterized protein                                                      |
| 2295                     | Q9CX56           | 7                    | 20             | 25.5                  | 353    | 39930  | 9.6  | 26S proteasome non-ATPase regulatory subunit 8                                        |
| 2296                     | Q9QZE7           | 7                    | 15             | 33.8                  | 290    | 32926  | 6.6  | Translin-associated protein X                                                         |
| 2296                     | UPI000155323C    | 7                    | 15             | 28.7                  | 341    | 38489  | 8.1  | PREDICTED: translin-associated protein X isoform 1                                    |
| 2297                     | P51859           | 7                    | 70             | 32.9                  | 237    | 26269  | 4.8  | Hepatoma-derived growth factor                                                        |
| 2298                     | P70677           | 7                    | 19             | 32.5                  | 277    | 31475  | 6.9  | Caspase-3                                                                             |
| 2299                     | Q9CQM9           | 7                    | 23             | 31.2                  | 337    | 37778  | 5.6  | Glutaredoxin-3                                                                        |
| 2300                     | Q8CAY6           | 7                    | 11             | 31                    | 397    | 41298  | 7.5  | Acetyl-CoA acetyltransferase, cytosolic                                               |
| 2301                     | P52430           | 7                    | 11             | 30.7                  | 355    | 39565  | 5.2  | Serum paraoxonase/arylesterase 1                                                      |
| 2302                     | Q8CHP8           | 7                    | 23             | 29.3                  | 321    | 34541  | 5.4  | Phosphoglycolate phosphatase                                                          |
| 2303                     | UPI0001F78DEE    | 7                    | 50             | 29.3                  | 273    | 29022  | 10   | cold shock domain protein A                                                           |
| 2303                     | Q64369           | 7                    | 50             | 29.2                  | 274    | 29314  | 10.1 | Y-box binding protein (Fragment)                                                      |
| 2303                     | Q9JKB3-2         | 7                    | 50             | 27.4                  | 292    | 30765  | 9.6  | Isoform 2 of DNA-binding protein A                                                    |
| 2303                     | Q68G78           | 7                    | 50             | 26.8                  | 299    | 31822  | 10.3 | Csda protein                                                                          |
| 2304                     | Q35955           | 7                    | 8              | 28.6                  | 273    | 29063  | 6.9  | Proteasome subunit beta type-10                                                       |
| 2304                     | Q4FJX8           | 7                    | 8              | 28.6                  | 273    | 29118  | 7.2  | Proteasome subunit beta type                                                          |
| 2304                     | Q3UNP9           | 7                    | 8              | 28.6                  | 273    | 29081  | 6.9  | Proteasome subunit beta type                                                          |
| 2305                     | Q3TAI4           | 7                    | 60             | 31.6                  | 206    | 22466  | 5.7  | Putative uncharacterized protein                                                      |
| 2305                     | Q9CZ22           | 7                    | 60             | 29.8                  | 218    | 23859  | 5.9  | Putative uncharacterized protein                                                      |
| 2305                     | Q9CYZ2           | 7                    | 60             | 29.5                  | 220    | 24043  | 6.1  | Tumor protein D54                                                                     |
| 2305                     | A2AUD5           | 7                    | 60             | 28.4                  | 229    | 25067  | 6.5  | Tumor protein D52-like 2                                                              |
| 2306                     | Q8BJL4           | 7                    | 10             | 28.2                  | 358    | 40430  | 7    | Lectin, mannose-binding 2                                                             |
| 2306                     | Q9DBH5           | 7                    | 10             | 28.2                  | 358    | 40416  | 7    | Vesicular integral-membrane protein VIP36                                             |
| 2307                     | Q6WVG3           | 7                    | 7              | 27.2                  | 327    | 35892  | 5.8  | BTB/POZ domain-containing protein KCTD12                                              |
| 2308                     | P47968           | 7                    | 13             | 27.1                  | 303    | 32451  | 8    | Ribose-5-phosphate isomerase                                                          |
| 2309                     | Q8VCN0           | 7                    | 9              | 26.2                  | 477    | 51985  | 5.3  | Agt protein                                                                           |
| 2310                     | P57759           | 7                    | 13             | 25.6                  | 262    | 28823  | 6.1  | Endoplasmic reticulum resident protein 29                                             |
| 2311                     | Q9DC51           | 7                    | 14             | 24.9                  | 354    | 40538  | 5.7  | Guanine nucleotide-binding protein G(k) subunit alpha                                 |
| 2312                     | Q91V12-4         | 7                    | 20             | 24.3                  | 379    | 41616  | 7.7  | Isoform D of Cytosolic acyl coenzyme A thioester hydrolase                            |
| 2312                     | Q91V12           | 7                    | 20             | 24.1                  | 381    | 42537  | 8.7  | Cytosolic acyl coenzyme A thioester hydrolase                                         |
| 2313                     | Q9WUB3           | 7                    | 8              | 24                    | 842    | 97286  | 7.1  | Glycogen phosphorylase, muscle form                                                   |
| 2314                     | Q9RON0           | 7                    | 9              | 22.8                  | 391    | 42176  | 5.3  | Galactokinase                                                                         |
| 2314                     | Q8OUL3           | 7                    | 9              | 22.7                  | 392    | 42309  | 5.3  | Galactokinase 1                                                                       |
| 2314                     | Q9JIA6           | 7                    | 9              | 22.7                  | 392    | 42295  | 5.3  | Galactokinase                                                                         |
| 2314                     | Q9CXZ9           | 7                    | 9              | 22.7                  | 392    | 42261  | 5.3  | Putative uncharacterized protein                                                      |
| 2315                     | Q35344           | 7                    | 13             | 21.7                  | 521    | 57773  | 4.9  | Importin subunit alpha-3                                                              |
| 2316                     | P16675           | 7                    | 23             | 19.8                  | 474    | 53844  | 5.9  | Lysosomal protective protein                                                          |
| 2316                     | Q9D2D1           | 7                    | 23             | 19.8                  | 474    | 53830  | 5.9  | Putative uncharacterized protein                                                      |
| 2317                     | P13439           | 7                    | 22             | 18.5                  | 481    | 52292  | 6.6  | Uridine 5'-monophosphate synthase                                                     |
| 2317                     | Q3TVV7           | 7                    | 22             | 18.5                  | 481    | 52193  | 6.5  | Putative uncharacterized protein                                                      |
| 2318                     | E9PW67           | 7                    | 15             | 18                    | 523    | 60022  | 6.5  | Uncharacterized protein                                                               |
| 2318                     | Q3TXV7           | 7                    | 15             | 18                    | 521    | 59741  | 6.7  | Putative uncharacterized protein                                                      |
| 2318                     | Q91XG3           | 7                    | 15             | 17.8                  | 528    | 60613  | 6.5  | Hexosaminidase A                                                                      |
| 2318                     | Q8BNS6           | 7                    | 15             | 17.8                  | 528    | 60553  | 6.5  | Putative uncharacterized protein                                                      |
| 2318                     | Q3UCP6           | 7                    | 15             | 17.8                  | 528    | 60682  | 6.7  | Putative uncharacterized protein                                                      |
| 2318                     | Q3U936           | 7                    | 15             | 17.8                  | 528    | 60579  | 6.5  | Putative uncharacterized protein                                                      |
| 2318                     | Q3TW10           | 7                    | 15             | 17.8                  | 528    | 60579  | 6.5  | Putative uncharacterized protein                                                      |
| 2318                     | Q3TVI2           | 7                    | 15             | 17.8                  | 528    | 60583  | 6.5  | Putative uncharacterized protein                                                      |
| 2319                     | Q9CT10           | 7                    | 12             | 17.9                  | 491    | 52573  | 5.1  | Ran-binding protein 3                                                                 |
| 2320                     | Q9DBB9           | 7                    | 16             | 17.6                  | 547    | 60479  | 5.9  | Carboxypeptidase N subunit 2                                                          |
| 2321                     | Q1KYL8           | 7                    | 10             | 15.3                  | 537    | 60568  | 8    | Gag polyprotein pr65                                                                  |
| 2321                     | Q1KYL9           | 7                    | 10             | 4.7                   | 1734   | 193994 | 8.9  | Gag-pro-pol polyprotein                                                               |
| 2322                     | P33434           | 7                    | 11             | 15.1                  | 662    | 74102  | 5.5  | 72 kDa type IV collagenase                                                            |
| 2323                     | Q99K10           | 7                    | 7              | 14.4                  | 780    | 85464  | 7.9  | Aconitate hydratase, mitochondrial                                                    |
| 2324                     | P70356           | 7                    | 12             | 14.1                  | 669    | 73666  | 8.2  | Envelope protein                                                                      |
| 2324                     | Q61919           | 7                    | 12             | 14.1                  | 669    | 73626  | 8.1  | Envelope protein                                                                      |
| 2324                     | Q60589           | 7                    | 12             | 14.1                  | 669    | 73825  | 8.1  | Envelope glycoprotein                                                                 |
| 2324                     | Q2HJ08           | 7                    | 12             | 14.1                  | 669    | 73804  | 8    | Melanoma antigen                                                                      |
| 2324                     | Q1KYM0           | 7                    | 12             | 14.1                  | 669    | 73698  | 8    | Env polyprotein                                                                       |
| 2324                     | Q04586           | 7                    | 12             | 14.1                  | 669    | 73728  | 8.2  | Env polyprotein                                                                       |
| 2324                     | UPI0001E6B600    | 7                    | 12             | 13.7                  | 687    | 75820  | 8.1  | PREDICTED: envelope glycoprotein-like                                                 |
| 2325                     | P06683           | 7                    | 20             | 13.5                  | 548    | 62002  | 5.8  | Complement component C9                                                               |
| 2326                     | P26262           | 7                    | 10             | 12.5                  | 638    | 71369  | 8    | Plasma kallikrein                                                                     |
| 2326                     | Q8R0P5           | 7                    | 10             | 12.5                  | 638    | 71383  | 8    | Kallikrein B, plasma 1                                                                |
| 2327                     | P32020-2         | 7                    | 13             | 47.6                  | 143    | 15237  | 9.3  | Isoform SCP2 of Non-specific lipid-transfer protein                                   |
| 2327                     | P32020           | 7                    | 13             | 12.4                  | 547    | 59126  | 7.4  | Non-specific lipid-transfer protein                                                   |
| 2328                     | UPI0001F78EBD    | 7                    | 32             | 12.4                  | 716    | 79203  | 4.9  | neural cell adhesion molecule 1                                                       |
| 2328                     | E9Q589           | 7                    | 32             | 12.3                  | 725    | 80358  | 4.9  | Uncharacterized protein                                                               |
| 2328                     | P13595-3         | 7                    | 32             | 12.3                  | 725    | 80406  | 4.9  | Isoform 3 of Neural cell adhesion molecule 1                                          |
| 2328                     | UPI0001F78EBC    | 7                    | 32             | 10.6                  | 839    | 92337  | 4.9  | neural cell adhesion molecule 1                                                       |
| 2328                     | P13595-2         | 7                    | 32             | 10.5                  | 848    | 93540  | 4.9  | Isoform 2 of Neural cell adhesion molecule 1                                          |
| 2328                     | E9QB01           | 7                    | 32             | 10.5                  | 848    | 93492  | 4.9  | Uncharacterized protein                                                               |
| 2328                     | UPI0001F78EBB    | 7                    | 32             | 8                     | 1106   | 118143 | 4.8  | neural cell adhesion molecule 1                                                       |
| 2328                     | UPI000162ECA8    | 7                    | 32             | 8                     | 1115   | 119298 | 4.8  | neural cell adhesion molecule 1 isoform 3                                             |
| 2328                     | P13595           | 7                    | 32             | 8                     | 1115   | 119427 | 4.8  | Neural cell adhesion molecule 1                                                       |
| 2329                     | Q6NXL1           | 7                    | 9              | 8.2                   | 1032   | 112676 | 7.2  | Sec24 related gene family, member D (S. cerevisiae)                                   |
| 2330                     | A2AP28           | 7                    | 14             | 7.9                   | 926    | 105975 | 6.6  | DEAD (Asp-Glu-Ala-Asp) box polypeptide 58                                             |
| 2330                     | A7YY79           | 7                    | 14             | 7.9                   | 925    | 105786 | 6.7  | Ddx58 protein (Fragment)                                                              |
| 2331                     | P97449           | 7                    | 10             | 6.9                   | 966    | 109651 | 5.9  | Aminopeptidase N                                                                      |
| 2332                     | Q3TPN0           | 7                    | 17             | 6.4                   | 1403   | 153943 | 5.4  | Putative uncharacterized protein                                                      |
| 2332                     | Q8CFA3           | 7                    | 17             | 6.4                   | 1403   | 153912 | 5.4  | Nidogen-2                                                                             |
| 2332                     | Q7TQF0           | 7                    | 17             | 6.4                   | 1403   | 153913 | 5.4  | Nidogen 2                                                                             |
| 2333                     | Q9Y2Q5           | 7                    | 49             | 90.4                  | 125    | 13507  | 5.4  | Ragulator complex protein LAMTOR2                                                     |
| 2334                     | Q99627           | 7                    | 23             | 75.6                  | 209    | 23226  | 5.4  | COP9 signalosome complex subunit 8                                                    |
| 2335                     | Q9Y3D0           | 7                    | 15             | 74.2                  | 163    | 17663  | 5.2  | Mitotic spindle-associated MMXD complex subunit MIP18                                 |
| 2336                     | P50583           | 7                    | 32             | 72.1                  | 147    | 16829  | 5.3  | Bis(5'-nucleosyl)-tetraphosphatase [asymmetrical]                                     |
| 2337                     | Q9Y547           | 7                    | 42             | 70.8                  | 144    | 16297  | 5    | Heat shock protein beta-11                                                            |
| 2338                     | A2YDF0           | 7                    | 27             | 70.1                  | 154    | 16765  | 5.6  | Fucose mutarotase                                                                     |
| 2339                     | Q969G6           | 7                    | 24             | 66.5                  | 155    | 17623  | 8.1  | Riboflavin kinase                                                                     |
| 2340                     | P04080           | 7                    | 83             | 66.3                  | 98     | 11140  | 7.6  | Cystatin-B                                                                            |
| 2341                     | Q8NFU3-4         | 7                    | 25             | 65.6                  | 122    | 13189  | 7.2  | Isoform 4 of Thiosulfate sulfurtransferase/rhodanese-like domain-containing protein 1 |
| 2342                     | Q6GMV3           | 7                    | 18             | 65                    | 140    | 15805  | 9.1  | Uncharacterized protein C2orf79                                                       |
| 2343                     | Q6IB68           | 7                    | 18             | 65                    | 103    | 11953  | 5.9  | MYCBP protein                                                                         |
| 2343                     | Q99417           | 7                    | 18             | 65                    | 103    | 11967  | 5.9  | C-Myc-binding protein                                                                 |
| 2344                     | Q9Y237           | 7                    | 66             | 63.4                  | 131    | 13810  | 9.8  | Peptidyl-prolyl cis-trans isomerase NIMA-interacting 4                                |
| 2345                     | O14737           | 7                    | 38             | 61.6                  | 125    | 14285  | 6    | Programmed cell death protein 5                                                       |
| 2346                     | Q53HV6           | 7                    | 31             | 61.6                  | 151    | 16584  | 7.7  | Niemann-Pick disease, type C2 variant (Fragment)                                      |
| 2347                     | Q43598           | 7                    | 70             | 60.9                  | 174    | 19108  | 5    | Deoxyribonucleoside 5'-monophosphate N-glycosidase                                    |
| 2347                     | UPI0001D3BABD    | 7                    | 70             | 43.6                  | 243    | 25868  | 5.5  | UPI0001D3BABD UniRef100 entry                                                         |
| 2348                     | Q8N668           | 7                    | 12             | 59.5                  | 190    | 21178  | 6.2  | COMM domain-containing protein 1                                                      |
| 2349                     | Q5JS54           | 7                    | 23             | 78                    | 123    | 13775  | 6.5  | Proteasome assembly chaperone 4                                                       |
| 2349                     | C9J2F8           | 7                    | 23             | 59.3                  | 162    | 17656  | 6.2  | HCG22882, isoform CRA_a                                                               |

Table S1. Proteins identified in the OVCAR-3 tumor supernatant by two or more unique peptides.

| Protein or Protein Group | Accession Number | Unique Peptide Count | Spectrum Count | Sequence Coverage (%) | Length | MolWt | pI   | Descriptive Name                                                                                      |
|--------------------------|------------------|----------------------|----------------|-----------------------|--------|-------|------|-------------------------------------------------------------------------------------------------------|
| 2350                     | B4DNR3           | 7                    | 22             | 58.9                  | 185    | 19797 | 6.4  | cDNA FLJ52710, highly similar to Abhydrolase domain-containing protein 14B                            |
| 2350                     | Q96IU4           | 7                    | 22             | 51.9                  | 210    | 22346 | 6.4  | Abhydrolase domain-containing protein 14B                                                             |
| 2351                     | Q9H0U4           | 7                    | 88             | 58.7                  | 201    | 22171 | 5.7  | Ras-related protein Rab-1B                                                                            |
| 2352                     | Q96C90           | 7                    | 33             | 58.5                  | 147    | 15911 | 4.9  | Protein phosphatase 1 regulatory subunit 14B                                                          |
| 2353                     | Q0VDC6           | 7                    | 64             | 57.9                  | 145    | 15689 | 9.2  | FKBP1A protein                                                                                        |
| 2354                     | Q95295           | 7                    | 19             | 56.6                  | 136    | 14874 | 9.3  | SNARE-associated protein Snapin                                                                       |
| 2355                     | Q9Y5S9           | 7                    | 41             | 56.3                  | 174    | 19889 | 5.7  | RNA-binding protein 8A                                                                                |
| 2356                     | P45877           | 7                    | 21             | 55.7                  | 212    | 22763 | 8.4  | Peptidyl-prolyl cis-trans isomerase C                                                                 |
| 2357                     | Q9BQI0           | 7                    | 94             | 55.3                  | 150    | 17068 | 7.2  | Allograft inflammatory factor 1-like                                                                  |
| 2357                     | UPI0001AF80B6    | 7                    | 94             | 55.3                  | 150    | 17068 | 7.2  | IONIZED CALCIUM-BINDING ADAPTER MOLECULE 2                                                            |
| 2357                     | Q9BQI0-2         | 7                    | 94             | 47.2                  | 176    | 20015 | 7.8  | Isoform 2 of Allograft inflammatory factor 1-like                                                     |
| 2358                     | Q96LR5           | 7                    | 28             | 55.2                  | 201    | 22255 | 7.7  | Ubiquitin-conjugating enzyme E2 E2                                                                    |
| 2359                     | UPI0000EE787D    | 7                    | 15             | 57.6                  | 210    | 22154 | 6.5  | PREDICTED: Parkinson disease 7 domain-containing protein 1-like                                       |
| 2359                     | Q8NB37           | 7                    | 15             | 55                    | 220    | 23298 | 6.6  | Parkinson disease 7 domain-containing protein 1                                                       |
| 2360                     | P19388           | 7                    | 19             | 54.3                  | 210    | 24551 | 6    | DNA-directed RNA polymerases I, II, and III subunit RPABC1                                            |
| 2361                     | Q9Y6A4           | 7                    | 18             | 53.9                  | 193    | 22774 | 9.8  | UPF0468 protein C16orf80                                                                              |
| 2362                     | P30043           | 7                    | 19             | 52.9                  | 206    | 22119 | 7.6  | Flavin reductase                                                                                      |
| 2363                     | P53999           | 7                    | 68             | 52.8                  | 127    | 14395 | 9.6  | Activated RNA polymerase II transcriptional coactivator p15                                           |
| 2364                     | Q6QNY1           | 7                    | 9              | 52.1                  | 142    | 15961 | 4.9  | Biogenesis of lysosome-related organelles complex 1 subunit 2                                         |
| 2365                     | Q96GD7           | 7                    | 20             | 51.8                  | 303    | 31931 | 9.7  | CSDA protein                                                                                          |
| 2366                     | P82979           | 7                    | 46             | 51.4                  | 210    | 23671 | 6.4  | SAP domain-containing ribonucleoprotein                                                               |
| 2367                     | Q9Y5Y2           | 7                    | 13             | 50.6                  | 271    | 28825 | 5.8  | Cytosolic Fe-S cluster assembly factor NUBP2                                                          |
| 2368                     | A8K646           | 7                    | 20             | 50                    | 214    | 23715 | 5.7  | cDNA FLJ75699, highly similar to sapiens osteoclast stimulating factor 1 (OSTF1), mRNA                |
| 2368                     | Q92882           | 7                    | 20             | 50                    | 214    | 23787 | 5.7  | Osteoclast-stimulating factor 1                                                                       |
| 2369                     | Q96CD2           | 7                    | 8              | 50                    | 204    | 22395 | 6.1  | Phosphopantothenoylcysteine decarboxylase                                                             |
| 2370                     | Q9NWX2           | 7                    | 9              | 48.2                  | 228    | 26749 | 5    | Protein C20orf11                                                                                      |
| 2371                     | P06899           | 7                    | 115            | 47.6                  | 126    | 13904 | 10.3 | Histone H2B type 1-J                                                                                  |
| 2371                     | Q16778           | 7                    | 115            | 47.6                  | 126    | 13920 | 10.3 | Histone H2B type 2-E                                                                                  |
| 2371                     | P33778           | 7                    | 115            | 47.6                  | 126    | 13950 | 10.3 | Histone H2B type 1-B                                                                                  |
| 2371                     | P23527           | 7                    | 115            | 47.6                  | 126    | 13906 | 10.3 | Histone H2B type 1-O                                                                                  |
| 2372                     | Q8N1Q1           | 7                    | 9              | 46.9                  | 262    | 29443 | 7    | Carbonic anhydrase 13                                                                                 |
| 2373                     | P00374           | 7                    | 11             | 46                    | 187    | 21453 | 7.4  | Dihydrofolate reductase                                                                               |
| 2374                     | Q9BV19           | 7                    | 10             | 45.7                  | 199    | 21877 | 5.9  | Uncharacterized protein C1orf50                                                                       |
| 2375                     | P26447           | 7                    | 203            | 45.5                  | 101    | 11728 | 6.1  | Protein S100-A4                                                                                       |
| 2376                     | UPI0001F77AB9    | 7                    | 15             | 47.4                  | 228    | 25199 | 5.9  | UPI0001F77AB9 UniRef100 entry                                                                         |
| 2376                     | Q6NVV8           | 7                    | 15             | 46.8                  | 231    | 25635 | 6.6  | IAH1 protein (Fragment)                                                                               |
| 2376                     | Q05D21           | 7                    | 15             | 45                    | 240    | 26443 | 6.5  | IAH1 protein (Fragment)                                                                               |
| 2376                     | Q2TAA2           | 7                    | 15             | 43.5                  | 248    | 27599 | 5.3  | Isoamyl acetate-hydrolyzing esterase 1 log                                                            |
| 2377                     | Q96MW1           | 7                    | 16             | 44.6                  | 224    | 25248 | 4.9  | Coiled-coil domain-containing protein 43                                                              |
| 2378                     | E9PL57           | 7                    | 33             | 44.1                  | 170    | 19536 | 7.4  | Uncharacterized protein                                                                               |
| 2379                     | Q43583           | 7                    | 34             | 42.9                  | 198    | 22092 | 5.3  | Density-regulated protein                                                                             |
| 2380                     | E9PPJ5           | 7                    | 30             | 48.9                  | 131    | 14374 | 9.5  | Uncharacterized protein                                                                               |
| 2380                     | P21741           | 7                    | 30             | 44.8                  | 143    | 15585 | 9.8  | Midkine                                                                                               |
| 2380                     | E9PLM6           | 7                    | 30             | 41                    | 156    | 16926 | 9.9  | Uncharacterized protein                                                                               |
| 2381                     | B2R6P4           | 7                    | 13             | 40.5                  | 220    | 24995 | 8.6  | cDNA, FLJ93048, highly similar to sapiens synaptobrevin-like 1 (SYBL1), mRNA                          |
| 2381                     | P51809           | 7                    | 13             | 40.5                  | 220    | 24935 | 8.6  | Vesicle-associated membrane protein 7                                                                 |
| 2382                     | Q5RNV6           | 7                    | 8              | 39.7                  | 272    | 28235 | 6.3  | Exosome complex exonuclease MTR3                                                                      |
| 2383                     | P46779           | 7                    | 25             | 39.4                  | 137    | 15747 | 12   | 60S ribosomal protein L28                                                                             |
| 2384                     | P28065           | 7                    | 14             | 38.8                  | 219    | 23264 | 5    | Proteasome subunit beta type-9                                                                        |
| 2385                     | Q9BZX2           | 7                    | 13             | 38.3                  | 261    | 29299 | 6.7  | Uridine-cytidine kinase 2                                                                             |
| 2386                     | P16455           | 7                    | 36             | 44                    | 207    | 21646 | 8.1  | Methylated-DNA--protein-cysteine methyltransferase                                                    |
| 2386                     | B4DEE8           | 7                    | 36             | 38.2                  | 238    | 25050 | 8.7  | cDNA FLJ56323, highly similar to Methylated-DNA--protein-cysteinemethyltransferase (EC 2.1.1.63)      |
| 2387                     | B3KM36           | 7                    | 7              | 37.4                  | 211    | 23712 | 6.7  | cDNA FLJ10153 fis, clone HEMBA1003417, highly similar to BAG family molecular chaperone regulator 2   |
| 2387                     | Q95816           | 7                    | 7              | 37.4                  | 211    | 23772 | 6.7  | BAG family molecular chaperone regulator 2                                                            |
| 2387                     | B3KN59           | 7                    | 7              | 37.4                  | 211    | 23748 | 6.6  | cDNA FLJ13673 fis, clone PLACE1011858, highly similar to BAG family molecular chaperone regulator 2   |
| 2388                     | A6NDU8           | 7                    | 11             | 37.1                  | 294    | 33620 | 5.3  | UPF0600 protein C5orf51                                                                               |
| 2389                     | Q6UWP2           | 7                    | 8              | 36.9                  | 260    | 28308 | 6.6  | Dehydrogenase/reductase SDR family member 11                                                          |
| 2390                     | Q9NT62           | 7                    | 18             | 36.9                  | 314    | 35864 | 4.7  | Ubiquitin-like-conjugating enzyme ATG3                                                                |
| 2391                     | Q6ZVX7           | 7                    | 17             | 35.3                  | 275    | 30847 | 6.6  | Non-specific cytotoxic cell receptor protein 1 log                                                    |
| 2392                     | Q7Z531           | 7                    | 9              | 37.2                  | 215    | 24312 | 8.7  | GTP:ATP phosphotransferase                                                                            |
| 2392                     | Q7Z4Y4           | 7                    | 9              | 35.2                  | 227    | 25620 | 9.3  | GTP:AMP phosphotransferase                                                                            |
| 2392                     | Q9UIJ7           | 7                    | 9              | 35.2                  | 227    | 25565 | 9.2  | GTP:AMP phosphotransferase, mitochondrial                                                             |
| 2393                     | P50402           | 7                    | 22             | 35                    | 254    | 28994 | 5.5  | Emerin                                                                                                |
| 2394                     | D3DVF0           | 7                    | 26             | 35.1                  | 296    | 32228 | 7.1  | F11 receptor, isoform CRA_a                                                                           |
| 2394                     | Q9Y624           | 7                    | 26             | 34.8                  | 299    | 32583 | 7.9  | Junctional adhesion molecule A                                                                        |
| 2394                     | B7Z5W1           | 7                    | 26             | 34.3                  | 303    | 32858 | 8.9  | cDNA FLJ54854, highly similar to Junctional adhesion molecule A                                       |
| 2395                     | B2RCM6           | 7                    | 15             | 34                    | 253    | 28194 | 9.5  | cDNA, FLJ96161                                                                                        |
| 2395                     | Q96S44           | 7                    | 15             | 34                    | 253    | 28160 | 9.5  | TP53-regulating kinase                                                                                |
| 2396                     | P41236           | 7                    | 14             | 33.2                  | 205    | 23015 | 4.7  | Protein phosphatase inhibitor 2                                                                       |
| 2397                     | B7Z6B3           | 7                    | 42             | 39.1                  | 156    | 17758 | 8.6  | cDNA FLJ53094, highly similar to Receptor expression-enhancing protein 5                              |
| 2397                     | B2R6C4           | 7                    | 42             | 33                    | 185    | 21117 | 8.1  | cDNA, FLJ92888, highly similar to sapiens likely ortholog of mouse deleted in polyposis 1 (DP1), mRNA |
| 2397                     | Q00765           | 7                    | 42             | 32.3                  | 189    | 21493 | 8.1  | Receptor expression-enhancing protein 5                                                               |
| 2398                     | Q14696           | 7                    | 15             | 32.9                  | 234    | 26077 | 7.8  | LDLR chaperone MESD                                                                                   |
| 2399                     | Q92876           | 7                    | 12             | 32.8                  | 244    | 26856 | 7.4  | Kallikrein-6                                                                                          |
| 2400                     | Q9Y657           | 7                    | 14             | 32.4                  | 262    | 29601 | 7    | Spindlin-1                                                                                            |
| 2401                     | Q5QPM7           | 7                    | 30             | 32.3                  | 263    | 28957 | 6.4  | Proteasome (Prosome, macropain) inhibitor subunit 1 (PI31)                                            |
| 2401                     | Q9Z530           | 7                    | 30             | 31.4                  | 271    | 29817 | 5.7  | Proteasome inhibitor PI31 subunit                                                                     |
| 2402                     | A9UHW6           | 7                    | 13             | 32                    | 222    | 25423 | 5.3  | MIF4G domain-containing protein                                                                       |
| 2402                     | UPI0000456B02    | 7                    | 13             | 23.7                  | 299    | 33661 | 8.5  | MIF4G domain containing                                                                               |
| 2403                     | Q9NPD3           | 7                    | 14             | 31.8                  | 245    | 26383 | 6.5  | Exosome complex exonuclease RRP41                                                                     |
| 2404                     | B3KNT8           | 7                    | 38             | 31.5                  | 368    | 42762 | 4.6  | cDNA FLJ30458 fis, clone BRACE2009421, highly similar to NUCLEOSOME ASSEMBLY PROTEIN 1-LIKE 1         |
| 2404                     | B7Z2V4           | 7                    | 38             | 30.3                  | 383    | 44600 | 4.6  | cDNA FLJ60539, highly similar to Nucleosome assembly protein 1-like 1                                 |
| 2404                     | P55209           | 7                    | 38             | 29.7                  | 391    | 45374 | 4.5  | Nucleosome assembly protein 1-like 1                                                                  |
| 2405                     | P46976-2         | 7                    | 23             | 33                    | 333    | 37479 | 5.4  | Isoform GN-1 of Glycogenin-1                                                                          |
| 2405                     | B2R5R5           | 7                    | 23             | 31.4                  | 350    | 39354 | 5.5  | cDNA, FLJ92583, highly similar to sapiens glycogenin (GYG), mRNA                                      |
| 2405                     | P46976           | 7                    | 23             | 31.4                  | 350    | 39384 | 5.5  | Glycogenin-1                                                                                          |
| 2406                     | Q6IPC0           | 7                    | 12             | 30.7                  | 453    | 49702 | 5.1  | Protein phosphatase 1F (PP2C domain containing)                                                       |
| 2406                     | P49593           | 7                    | 12             | 30.6                  | 454    | 49831 | 5.1  | Protein phosphatase 1F                                                                                |
| 2407                     | Q9Y296           | 7                    | 11             | 35.6                  | 219    | 24340 | 6.2  | Trafficking protein particle complex subunit 4                                                        |
| 2407                     | E9PN70           | 7                    | 11             | 30.4                  | 257    | 28818 | 8.5  | Uncharacterized protein                                                                               |

Table S1. Proteins identified in the OVCAR-3 tumor supernatant by two or more unique peptides.

| Protein or Protein Group | Accession Number | Unique Peptide Count | Spectrum Count | Sequence Coverage (%) | Length | MolWt | pI  | Descriptive Name                                                                                                               |
|--------------------------|------------------|----------------------|----------------|-----------------------|--------|-------|-----|--------------------------------------------------------------------------------------------------------------------------------|
| 2408                     | Q9BQ67           | 7                    | 9              | 30.3                  | 446    | 49419 | 4.9 | Glutamate-rich WD repeat-containing protein 1                                                                                  |
| 2409                     | A8MZF9           | 7                    | 7              | 30                    | 343    | 38129 | 8.9 | Uncharacterized protein                                                                                                        |
| 2409                     | Q53Y50           | 7                    | 7              | 28.3                  | 364    | 40777 | 8.9 | Developmentally regulated GTP binding protein 2                                                                                |
| 2409                     | P55039           | 7                    | 7              | 28.3                  | 364    | 40746 | 8.9 | Developmentally-regulated GTP-binding protein 2                                                                                |
| 2410                     | O75818-2         | 7                    | 9              | 32.1                  | 340    | 39327 | 7   | Isoform 2 of Ribonuclease P protein subunit p40                                                                                |
| 2410                     | O75818           | 7                    | 9              | 30                    | 363    | 41834 | 6.7 | Ribonuclease P protein subunit p40                                                                                             |
| 2411                     | P35249           | 7                    | 7              | 30                    | 363    | 39682 | 8   | Replication factor C subunit 4                                                                                                 |
| 2412                     | O00442           | 7                    | 15             | 29.8                  | 366    | 39337 | 7.9 | RNA 3'-terminal phosphate cyclase                                                                                              |
| 2412                     | O00442-2         | 7                    | 15             | 28.8                  | 379    | 40709 | 8.3 | Isoform 2 of RNA 3'-terminal phosphate cyclase                                                                                 |
| 2413                     | Q96EP5-2         | 7                    | 17             | 31.5                  | 378    | 40530 | 8.3 | Isoform 2 of DAZ-associated protein 1                                                                                          |
| 2413                     | Q96EP5           | 7                    | 17             | 29.2                  | 407    | 43383 | 8.6 | DAZ-associated protein 1                                                                                                       |
| 2414                     | Q9H479           | 7                    | 10             | 29.1                  | 309    | 35171 | 7.6 | Fructosamine-3-kinase                                                                                                          |
| 2415                     | Q13287           | 7                    | 8              | 28.7                  | 307    | 35057 | 5.3 | N-myc-interactor                                                                                                               |
| 2415                     | Q8WTW2           | 7                    | 8              | 28.7                  | 307    | 35085 | 5.3 | N-myc (And STAT) interactor                                                                                                    |
| 2416                     | Q8WYQ7           | 7                    | 23             | 29.3                  | 311    | 34691 | 8.1 | Galectin-9                                                                                                                     |
| 2416                     | B3KWW5           | 7                    | 23             | 28.2                  | 323    | 35918 | 8.1 | cDNA FLJ44029 fis, clone TEST14027557, highly similar to Galectin-9                                                            |
| 2416                     | Q53FQ0           | 7                    | 23             | 28.2                  | 323    | 35858 | 8.1 | Galectin 9 short isoform variant (Fragment)                                                                                    |
| 2416                     | Q3B8N1           | 7                    | 23             | 28.2                  | 323    | 35888 | 8.1 | Lectin, galactoside-binding, soluble, 9                                                                                        |
| 2416                     | O00182           | 7                    | 23             | 25.6                  | 355    | 39518 | 9.2 | Galectin-9                                                                                                                     |
| 2417                     | P42126-2         | 7                    | 8              | 29.8                  | 285    | 30896 | 8.9 | Isoform 2 of 3,2-trans-enoyl-CoA isomerase, mitochondrial                                                                      |
| 2417                     | P42126           | 7                    | 8              | 28.1                  | 302    | 32816 | 8.6 | 3,2-trans-enoyl-CoA isomerase, mitochondrial                                                                                   |
| 2418                     | B2RA70           | 7                    | 15             | 26.9                  | 543    | 60831 | 6.7 | cDNA, FLJ94729, highly similar to sapiens v-yes-1 Yamaguchi sarcoma viral oncogene log 1 (YES1), mRNA                          |
| 2418                     | P07947           | 7                    | 15             | 26.9                  | 543    | 60801 | 6.7 | Proto-oncogene tyrosine-protein kinase Yes                                                                                     |
| 2419                     | B3KY04           | 7                    | 7              | 26.8                  | 325    | 35731 | 5.6 | BTB/POZ domain-containing protein KCTD12                                                                                       |
| 2419                     | Q96CX2           | 7                    | 7              | 26.8                  | 325    | 35701 | 5.6 | BTB/POZ domain-containing protein KCTD12                                                                                       |
| 2420                     | Q9H0E2           | 7                    | 13             | 34.3                  | 274    | 30282 | 6   | Toll-interacting protein                                                                                                       |
| 2420                     | Q09FB9           | 7                    | 13             | 26.7                  | 352    | 38895 | 8.5 | Toll interacting protein variant (Fragment)                                                                                    |
| 2421                     | P16422           | 7                    | 17             | 28.7                  | 314    | 34932 | 7.5 | Epithelial cell adhesion molecule                                                                                              |
| 2421                     | B5MCA4           | 7                    | 17             | 26.3                  | 342    | 37893 | 8.5 | Uncharacterized protein                                                                                                        |
| 2422                     | Q96EE3           | 7                    | 9              | 24.7                  | 360    | 39649 | 8.1 | Nucleoporin SEH1                                                                                                               |
| 2422                     | Q96EE3-1         | 7                    | 9              | 21.1                  | 421    | 46578 | 7.9 | Isoform B of Nucleoporin SEH1                                                                                                  |
| 2423                     | Q13057           | 7                    | 10             | 24.1                  | 564    | 62329 | 7   | Bifunctional coenzyme A synthase                                                                                               |
| 2424                     | P02649           | 7                    | 17             | 23                    | 317    | 36154 | 5.7 | Apolipoprotein E                                                                                                               |
| 2425                     | Q9BSL1           | 7                    | 10             | 22.7                  | 405    | 45338 | 4.9 | Ubiquitin-associated domain-containing protein 1                                                                               |
| 2426                     | B4DTA9           | 7                    | 11             | 24                    | 429    | 48089 | 6.4 | cDNA FLJ59753                                                                                                                  |
| 2426                     | A8K5C2           | 7                    | 11             | 22.6                  | 456    | 51075 | 6.4 | cDNA FLJ75055                                                                                                                  |
| 2427                     | Q9H788           | 7                    | 14             | 22                    | 454    | 52727 | 8.1 | SH2 domain-containing protein 4A                                                                                               |
| 2428                     | E7EV16           | 7                    | 19             | 27.9                  | 398    | 44135 | 6.5 | Uncharacterized protein                                                                                                        |
| 2428                     | B4DRB4           | 7                    | 19             | 27.9                  | 398    | 44163 | 6.5 | cDNA FLJ57173, highly similar to Phospholipid transfer protein                                                                 |
| 2428                     | P55058-2         | 7                    | 19             | 25.2                  | 441    | 49272 | 6.6 | Isoform 2 of Phospholipid transfer protein                                                                                     |
| 2428                     | Q53H91           | 7                    | 19             | 22.5                  | 493    | 54707 | 7   | Phospholipid transfer protein isoform a variant (Fragment)                                                                     |
| 2428                     | P55058           | 7                    | 19             | 22.5                  | 493    | 54739 | 7   | Phospholipid transfer protein                                                                                                  |
| 2428                     | B3KUE5           | 7                    | 19             | 21.6                  | 513    | 56635 | 6.6 | Phospholipid transfer protein, isoform CRA_c                                                                                   |
| 2429                     | B4DKK3           | 7                    | 17             | 21.6                  | 366    | 42018 | 7.8 | cDNA FLJ54791, highly similar to DnaJ log subfamily C member 7                                                                 |
| 2429                     | B7Z9W6           | 7                    | 17             | 18                    | 438    | 50067 | 8.1 | cDNA, FLJ78980, highly similar to DnaJ log subfamily C member 7                                                                |
| 2429                     | Q59EH7           | 7                    | 17             | 16.4                  | 483    | 55418 | 7.5 | DnaJ (Hsp40) log, subfamily C, member 7 variant (Fragment)                                                                     |
| 2429                     | Q99615           | 7                    | 17             | 16                    | 494    | 56441 | 7   | DnaJ log subfamily C member 7                                                                                                  |
| 2430                     | Q9NR12           | 7                    | 24             | 20.8                  | 457    | 49845 | 8.4 | PDZ and LIM domain protein 7                                                                                                   |
| 2431                     | B4DL54           | 7                    | 13             | 19.3                  | 471    | 52785 | 5.9 | cDNA FLJ59570, highly similar to Protein farnesyltransferase subunit beta (EC 2.5.1.58)                                        |
| 2432                     | B3KP31           | 7                    | 11             | 19.2                  | 478    | 51489 | 6.8 | Carbohydrate kinase-like protein (EC 2.7.1.-)                                                                                  |
| 2432                     | Q9UHJ6           | 7                    | 11             | 19.2                  | 478    | 51491 | 6.8 | Sedoheptulokinase                                                                                                              |
| 2433                     | E9PDK5           | 7                    | 15             | 21.8                  | 412    | 45728 | 8.5 | Uncharacterized protein                                                                                                        |
| 2433                     | B4DVE7           | 7                    | 15             | 19.1                  | 472    | 51242 | 7.7 | cDNA FLJ58379, highly similar to Annexin A11                                                                                   |
| 2433                     | P50995           | 7                    | 15             | 17.8                  | 505    | 54390 | 7.7 | Annexin A11                                                                                                                    |
| 2434                     | Q9BZG8           | 7                    | 11             | 19.4                  | 443    | 48805 | 8.2 | Diphthamide biosynthesis protein 1                                                                                             |
| 2434                     | B4DNK0           | 7                    | 11             | 19                    | 453    | 50246 | 8.3 | cDNA FLJ55582, highly similar to sapiens DPH1 log (DPH1), mRNA                                                                 |
| 2434                     | E7ENH3           | 7                    | 11             | 19                    | 453    | 50274 | 8.2 | Uncharacterized protein                                                                                                        |
| 2435                     | B3KU60           | 7                    | 12             | 18.6                  | 505    | 58310 | 5.2 | cDNA FLJ39235 fis, clone OCBBF2007829, highly similar to Mus musculus fatso protein                                            |
| 2435                     | Q9C0B1           | 7                    | 12             | 18.6                  | 505    | 58282 | 5.2 | Alpha-ketoglutarate-dependent dioxygenase FTO                                                                                  |
| 2436                     | B2R6S9           | 7                    | 8              | 18.5                  | 357    | 41480 | 8.9 | cDNA, FLJ93097, highly similar to sapiens low density lipoprotein receptor-related protein associated protein 1 (LRPAP1), mRNA |
| 2436                     | P30533           | 7                    | 8              | 18.5                  | 357    | 41466 | 8.8 | Alpha-2-macroglobulin receptor-associated protein                                                                              |
| 2437                     | E5KMT6           | 7                    | 8              | 18.5                  | 399    | 44377 | 7.7 | Pseudouridine synthase                                                                                                         |
| 2437                     | Q9Y606           | 7                    | 8              | 17.3                  | 427    | 47470 | 8.4 | tRNA pseudouridine synthase A, mitochondrial                                                                                   |
| 2438                     | O00515           | 7                    | 26             | 17.8                  | 517    | 57131 | 9.7 | Ladinin-1                                                                                                                      |
| 2438                     | E9PDI4           | 7                    | 26             | 17.3                  | 531    | 58678 | 9.9 | Uncharacterized protein                                                                                                        |
| 2439                     | Q96EK5           | 7                    | 10             | 17.1                  | 621    | 71814 | 5.5 | KIF1-binding protein                                                                                                           |
| 2440                     | B2RDV7           | 7                    | 8              | 16.8                  | 650    | 72620 | 8.1 | cDNA, FLJ96789, highly similar to sapiens dihydrouridine synthase 3-like (S. cerevisiae) (DUS3L), mRNA                         |
| 2440                     | Q96G46           | 7                    | 8              | 16.8                  | 650    | 72594 | 8.1 | tRNA-dihydrouridine synthase 3-like                                                                                            |
| 2441                     | Q9NXV6           | 7                    | 11             | 16.7                  | 580    | 61125 | 9   | CDKN2A-interacting protein                                                                                                     |
| 2442                     | Q9P2G3           | 7                    | 13             | 15.8                  | 628    | 70714 | 6.7 | Kelch-like protein 14                                                                                                          |
| 2443                     | Q6FHF7           | 7                    | 12             | 15.2                  | 567    | 65042 | 5.7 | RABGTA protein (Fragment)                                                                                                      |
| 2443                     | Q92696           | 7                    | 12             | 15.2                  | 567    | 65072 | 5.7 | Geranyl/geranyl transferase type-2 subunit alpha                                                                               |
| 2444                     | B5MCF9           | 7                    | 13             | 14.4                  | 571    | 66078 | 7.5 | Uncharacterized protein                                                                                                        |
| 2444                     | O00541-2         | 7                    | 13             | 14.1                  | 583    | 67456 | 7.5 | Isoform 2 of Pescadillo log                                                                                                    |
| 2444                     | O00541           | 7                    | 13             | 13.9                  | 588    | 68003 | 7.3 | Pescadillo log                                                                                                                 |
| 2445                     | B4DLY4           | 7                    | 7              | 17.1                  | 674    | 73177 | 7   | cDNA FLJ52327, highly similar to Aconitate hydratase, mitochondrial (EC 4.2.1.3)                                               |
| 2445                     | B4DJW1           | 7                    | 7              | 16.5                  | 697    | 75949 | 7.5 | cDNA FLJ54329, highly similar to Aconitate hydratase, mitochondrial (EC 4.2.1.3)                                               |
| 2445                     | B4DZ08           | 7                    | 7              | 15.1                  | 761    | 83413 | 7.7 | cDNA FLJ51705, highly similar to Aconitate hydratase, mitochondrial (EC 4.2.1.3)                                               |
| 2445                     | Q99798           | 7                    | 7              | 14.7                  | 780    | 85425 | 7.6 | Aconitate hydratase, mitochondrial                                                                                             |
| 2445                     | B2RBW5           | 7                    | 7              | 14.7                  | 780    | 85453 | 7.6 | cDNA, FLJ95737, highly similar to sapiens aconitase 2, mitochondrial (ACO2), nuclear geneencoding mitochondrial protein, mRNA  |
| 2445                     | A2A274           | 7                    | 7              | 14.3                  | 805    | 87820 | 7.4 | Aconitase 2, mitochondrial                                                                                                     |
| 2446                     | Q9Y5P4-2         | 7                    | 10             | 17.9                  | 598    | 68007 | 5.5 | Isoform 2 of Collagen type IV alpha-3-binding protein                                                                          |
| 2446                     | Q9Y5P4           | 7                    | 10             | 17.1                  | 624    | 70835 | 5.5 | Collagen type IV alpha-3-binding protein                                                                                       |
| 2446                     | B3KUB7           | 7                    | 10             | 14.2                  | 752    | 83708 | 6.3 | Collagen, type IV, alpha 3 (Goodpasture antigen) binding protein, isoform CRA_c                                                |

Table S1. Proteins identified in the OVCAR-3 tumor supernatant by two or more unique peptides.

| Protein or Protein Group | Accession Number | Unique Peptide Count | Spectrum Count | Sequence Coverage (%) | Length | MolWt  | pI   | Descriptive Name                                                                                                                            |
|--------------------------|------------------|----------------------|----------------|-----------------------|--------|--------|------|---------------------------------------------------------------------------------------------------------------------------------------------|
| 2447                     | Q15057           | 7                    | 11             | 14                    | 778    | 88029  | 6.8  | Arf-GAP with coiled-coil, ANK repeat and PH domain-containing protein 2                                                                     |
| 2448                     | Q9ULE6           | 7                    | 8              | 14                    | 856    | 96754  | 6.5  | Paladin                                                                                                                                     |
| 2449                     | Q96RQ9           | 7                    | 16             | 14.5                  | 567    | 62881  | 8.7  | L-amino-acid oxidase                                                                                                                        |
| 2449                     | A2RRH1           | 7                    | 16             | 13.9                  | 589    | 65358  | 8.5  | Interleukin 4 induced 1                                                                                                                     |
| 2449                     | Q1WJM3           | 7                    | 16             | 13.9                  | 589    | 65328  | 8.5  | HCG2043070                                                                                                                                  |
| 2450                     | Q08AM6           | 7                    | 13             | 13.7                  | 782    | 87973  | 6.1  | Protein VAC14 log                                                                                                                           |
| 2451                     | Q9UKN8           | 7                    | 20             | 12.5                  | 822    | 91982  | 6.7  | General transcription factor 3C polypeptide 4                                                                                               |
| 2452                     | A8K0P8           | 7                    | 7              | 11.6                  | 756    | 87057  | 5.7  | cDNA FLJ78223                                                                                                                               |
| 2452                     | Q68CQ4           | 7                    | 7              | 11.6                  | 756    | 87055  | 5.9  | Digestive organ expansion factor log                                                                                                        |
| 2453                     | O75843           | 7                    | 15             | 11.3                  | 785    | 87117  | 6.6  | AP-1 complex subunit gamma-like 2                                                                                                           |
| 2454                     | O94776           | 7                    | 11             | 10.6                  | 668    | 75023  | 9.7  | Metastasis-associated protein MTA2                                                                                                          |
| 2455                     | UPI000150DAB3    | 7                    | 10             | 12.3                  | 767    | 85452  | 7    | epithelial discoidin domain-containing receptor 1 isoform 5 precursor                                                                       |
| 2455                     | Q1XI08           | 7                    | 10             | 10.7                  | 876    | 97174  | 6.5  | Discoidin receptor tyrosine kinase isoform b                                                                                                |
| 2455                     | Q08345           | 7                    | 10             | 10.3                  | 913    | 101128 | 6.8  | Epithelial discoidin domain-containing receptor 1                                                                                           |
| 2455                     | Q08345-5         | 7                    | 10             | 10.2                  | 919    | 101796 | 6.8  | Isoform 4 of Epithelial discoidin domain-containing receptor 1                                                                              |
| 2456                     | Q15386           | 7                    | 7              | 10.3                  | 1083   | 123923 | 6.7  | Ubiquitin-protein ligase E3C                                                                                                                |
| 2457                     | B2RTR1           | 7                    | 18             | 9.8                   | 1515   | 165854 | 8.3  | CLASP2 protein                                                                                                                              |
| 2457                     | UPI00004C2784    | 7                    | 18             | 9.8                   | 1506   | 164886 | 8.2  | CLIP-associating protein 2                                                                                                                  |
| 2457                     | E7EW49           | 7                    | 18             | 9.8                   | 1514   | 165698 | 8.2  | Uncharacterized protein                                                                                                                     |
| 2457                     | E7ER18           | 7                    | 18             | 9.8                   | 1513   | 165627 | 8.2  | Uncharacterized protein                                                                                                                     |
| 2458                     | Q6NT75           | 7                    | 11             | 9.5                   | 1215   | 131420 | 5.3  | HDAC6 protein                                                                                                                               |
| 2458                     | Q9UBN7           | 7                    | 11             | 9.5                   | 1215   | 131419 | 5.3  | Histone deacetylase 6                                                                                                                       |
| 2459                     | Q6S8J3           | 7                    | 416            | 8.9                   | 1075   | 121363 | 6.2  | POTE ankyrin domain family member E cDNA, FLJ95596, highly similar to sapiens activity-dependent neuroprotector (ADNP), mRNA                |
| 2460                     | B2RBM8           | 7                    | 15             | 8.3                   | 1102   | 123616 | 7.4  | Activity-dependent neuroprotector homeobox protein                                                                                          |
| 2460                     | Q9H2P0           | 7                    | 15             | 8.3                   | 1102   | 123563 | 7.3  | Activity-dependent neuroprotector homeobox                                                                                                  |
| 2460                     | Q6DHz8           | 7                    | 15             | 8.3                   | 1102   | 123447 | 7.4  | Activity-dependent neuroprotector homeobox                                                                                                  |
| 2461                     | E9PJ18           | 7                    | 9              | 7.9                   | 1195   | 127430 | 6.5  | Uncharacterized protein                                                                                                                     |
| 2461                     | A7E261           | 7                    | 9              | 7.4                   | 1288   | 137429 | 6.6  | 5-oxoprolinase (ATP-hydrolysing)                                                                                                            |
| 2461                     | O14841           | 7                    | 9              | 7.4                   | 1288   | 137457 | 6.6  | 5-oxoprolinase                                                                                                                              |
| 2461                     | C9JLE8           | 7                    | 9              | 7.4                   | 1287   | 137370 | 6.6  | Uncharacterized protein                                                                                                                     |
| 2462                     | Q7Z478           | 7                    | 12             | 6.7                   | 1369   | 155235 | 8.1  | ATP-dependent RNA helicase DHX29                                                                                                            |
| 2463                     | B7ZM70           | 7                    | 11             | 7.4                   | 1122   | 124400 | 5.8  | Putative uncharacterized protein cDNA FLJ45101 fis, clone BRAWH3032298, highly similar to                                                   |
| 2463                     | B3KXB6           | 7                    | 11             | 6.4                   | 1299   | 143904 | 5.6  | Tenascin-N                                                                                                                                  |
| 2463                     | Q9UQP3           | 7                    | 11             | 6.4                   | 1299   | 144034 | 5.6  | Tenascin-N                                                                                                                                  |
| 2464                     | Q1RMC7           | 7                    | 8              | 6.2                   | 1551   | 169654 | 6.2  | ROBO1 protein                                                                                                                               |
| 2464                     | E9PD49           | 7                    | 8              | 6.2                   | 1551   | 169660 | 6.2  | Uncharacterized protein                                                                                                                     |
| 2464                     | B2RX11           | 7                    | 8              | 6                     | 1606   | 175835 | 6.1  | ROBO1 protein                                                                                                                               |
| 2464                     | Q9Y6N7-4         | 7                    | 8              | 6                     | 1612   | 176570 | 6.1  | Isoform 4 of Roundabout log 1                                                                                                               |
| 2464                     | Q2M1J3           | 7                    | 8              | 6                     | 1607   | 175892 | 6.1  | ROBO1 protein                                                                                                                               |
| 2464                     | Q1RMC8           | 7                    | 8              | 6                     | 1606   | 175829 | 6.1  | ROBO1 protein                                                                                                                               |
| 2464                     | UPI00006C0726    | 7                    | 8              | 5.9                   | 1615   | 176725 | 6.2  | PREDICTED: roundabout log 1-like isoform 2                                                                                                  |
| 2464                     | Q9Y6N7-3         | 7                    | 8              | 5.9                   | 1615   | 176813 | 6.1  | Isoform 3 of Roundabout log 1                                                                                                               |
| 2464                     | Q9Y6N7-2         | 7                    | 8              | 5.8                   | 1655   | 181327 | 6.1  | Isoform 2 of Roundabout log 1                                                                                                               |
| 2464                     | Q9Y6N7           | 7                    | 8              | 5.8                   | 1651   | 180928 | 6    | Roundabout log 1                                                                                                                            |
| 2465                     | Q7LBC6           | 7                    | 20             | 5.5                   | 1761   | 191580 | 7.2  | Lysine-specific demethylase 3B                                                                                                              |
| 2466                     | O43157-2         | 7                    | 9              | 5.9                   | 1952   | 214409 | 5.8  | Isoform 2 of Plexin-B1                                                                                                                      |
| 2466                     | O43157           | 7                    | 9              | 5.4                   | 2135   | 232296 | 5.5  | Plexin-B1                                                                                                                                   |
| 2467                     | Q14CF1           | 7                    | 8              | 5.6                   | 1722   | 192074 | 6.5  | TRIP12 protein                                                                                                                              |
| 2467                     | Q14669           | 7                    | 8              | 4.9                   | 1992   | 220432 | 8.5  | Probable E3 ubiquitin-protein ligase TRIP12                                                                                                 |
| 2467                     | D4HL82           | 7                    | 8              | 4.8                   | 2025   | 223928 | 8.4  | ULF                                                                                                                                         |
| 2467                     | Q14CA3           | 7                    | 8              | 4.8                   | 2040   | 225518 | 8.7  | TRIP12 protein                                                                                                                              |
| 2468                     | Q14676-4         | 7                    | 26             | 7.1                   | 1066   | 116634 | 4.9  | Isoform 4 of Mediator of DNA damage checkpoint protein 1                                                                                    |
| 2468                     | E7EVA7           | 7                    | 26             | 4.2                   | 1802   | 195957 | 5.2  | Uncharacterized protein                                                                                                                     |
| 2468                     | Q14676-3         | 7                    | 26             | 4.2                   | 1802   | 195985 | 5.2  | Isoform 3 of Mediator of DNA damage checkpoint protein 1                                                                                    |
| 2468                     | Q14676-2         | 7                    | 26             | 4.2                   | 1825   | 197597 | 5.7  | Isoform 2 of Mediator of DNA damage checkpoint protein 1                                                                                    |
| 2468                     | E9PGY5           | 7                    | 26             | 4.2                   | 1825   | 197569 | 5.7  | Uncharacterized protein                                                                                                                     |
| 2468                     | Q14676           | 7                    | 26             | 3.6                   | 2089   | 226664 | 5.5  | Mediator of DNA damage checkpoint protein 1                                                                                                 |
| 2469                     | E5RHG8           | 6                    | 48             | 7.3                   | 89     | 9960   | 5.4  | Uncharacterized protein                                                                                                                     |
| 2469                     | Q15369           | 6                    | 48             | 5.8                   | 112    | 12473  | 4.8  | Transcription elongation factor B polypeptide 1                                                                                             |
| 2470                     | P04350           | 6                    | 190            | 69.1                  | 444    | 49586  | 4.9  | Transcription elongation factor B polypeptide 1                                                                                             |
| 2471                     | O70569           | 6                    | 58             | 62.9                  | 151    | 16301  | 10.1 | Tubulin beta-4 chain Tubulin beta-4 chain                                                                                                   |
| 2471                     | P62263           | 6                    | 58             | 62.9                  | 151    | 16273  | 10.1 | Ribosomal protein S14                                                                                                                       |
| 2472                     | O15514           | 6                    | 28             | 62                    | 142    | 16311  | 4.8  | 40S ribosomal protein S14 40S ribosomal protein S14 DNA-directed RNA polymerase II subunit RPB4 DNA-directed RNA polymerase II subunit RPB4 |
| 2473                     | P52434           | 6                    | 36             | 59.3                  | 150    | 17143  | 4.7  | DNA-directed RNA polymerases I, II, and III subunit RPABC3 DNA-directed RNA polymerases I, II, and III subunit RPABC3                       |
| 2474                     | P62888           | 6                    | 110            | 59.1                  | 115    | 12784  | 9.6  | 60S ribosomal protein L30 60S ribosomal protein L30                                                                                         |
| 2474                     | UPI00001C64B1    | 6                    | 110            | 59.1                  | 115    | 12830  | 9.6  | PREDICTED: 60S ribosomal protein L30-like                                                                                                   |
| 2474                     | UPI0000024F43    | 6                    | 110            | 59.1                  | 115    | 12832  | 9.6  | PREDICTED: 60S ribosomal protein L30-like                                                                                                   |
| 2475                     | Q6IAA8           | 6                    | 42             | 57.8                  | 161    | 17745  | 5.1  | Ragulator complex protein LAMTOR1                                                                                                           |
| 2475                     | Q9CQ22           | 6                    | 42             | 57.8                  | 161    | 17749  | 5.1  | Ragulator complex protein LAMTOR1                                                                                                           |
| 2476                     | P30050           | 6                    | 108            | 54.5                  | 165    | 17819  | 9.4  | 60S ribosomal protein L12                                                                                                                   |
| 2476                     | UPI000002163C    | 6                    | 108            | 54.5                  | 165    | 17792  | 9.4  | PREDICTED: 60S ribosomal protein L12-like                                                                                                   |
| 2476                     | Q3TIQ2           | 6                    | 108            | 54.5                  | 165    | 17775  | 9.4  | Putative uncharacterized protein                                                                                                            |
| 2476                     | P35979           | 6                    | 108            | 54.5                  | 165    | 17805  | 9.4  | 60S ribosomal protein L12                                                                                                                   |
| 2477                     | P84095           | 6                    | 24             | 51.8                  | 191    | 21308  | 8.1  | Rho-related GTP-binding protein RhoG Rho-related GTP-binding protein RhoG                                                                   |
| 2478                     | P01112           | 6                    | 44             | 50.8                  | 189    | 21298  | 5.3  | GTPase HRas GTPase HRas                                                                                                                     |
| 2478                     | Q6P716           | 6                    | 44             | 39.5                  | 243    | 26290  | 7.6  | Hras1 protein (Fragment)                                                                                                                    |
| 2479                     | UPI0000024CCD    | 6                    | 124            | 52.2                  | 115    | 12895  | 9.9  | PREDICTED: 40S ribosomal protein S20-like, partial                                                                                          |
| 2479                     | P60866           | 6                    | 124            | 50.4                  | 119    | 13373  | 9.9  | 40S ribosomal protein S20 40S ribosomal protein S20                                                                                         |
| 2480                     | P63173           | 6                    | 80             | 50                    | 70     | 8218   | 10.1 | 60S ribosomal protein L38                                                                                                                   |
| 2480                     | Q9JJ18           | 6                    | 80             | 50                    | 70     | 8204   | 10.1 | 60S ribosomal protein L38                                                                                                                   |
| 2481                     | B4E241           | 6                    | 74             | 49.2                  | 124    | 14203  | 10.1 | Splicing factor, arginine/serine-rich 3, isoform CRA_a Splicing factor, arginine/serine-rich 3, isoform CRA_a                               |
| 2481                     | Q9D6W4           | 6                    | 74             | 37.2                  | 164    | 19358  | 11.7 | Putative uncharacterized protein                                                                                                            |
| 2481                     | P84103           | 6                    | 74             | 37.2                  | 164    | 19330  | 11.6 | Serine/arginine-rich splicing factor 3 Serine/arginine-rich splicing factor 3                                                               |
| 2482                     | P62266           | 6                    | 138            | 49                    | 143    | 15808  | 10.5 | 40S ribosomal protein S23 40S ribosomal protein S23                                                                                         |
| 2482                     | Q9CWI9           | 6                    | 138            | 49                    | 143    | 15836  | 10.6 | Putative uncharacterized protein                                                                                                            |
| 2482                     | Q497E1           | 6                    | 138            | 49                    | 143    | 15808  | 10.4 | Ribosomal protein S23                                                                                                                       |
| 2482                     | Q9CZI5           | 6                    | 138            | 48.3                  | 145    | 16017  | 10.4 | Putative uncharacterized protein                                                                                                            |
| 2483                     | B2R7U5           | 6                    | 19             | 47.8                  | 186    | 21356  | 7.7  | cDNA, FLJ93607                                                                                                                              |
| 2483                     | Q96BM9           | 6                    | 19             | 47.8                  | 186    | 21416  | 7.8  | ADP-ribosylation factor-like protein 8A                                                                                                     |
| 2483                     | Q8VEH3           | 6                    | 19             | 47.8                  | 186    | 21390  | 7.8  | ADP-ribosylation factor-like protein 8A                                                                                                     |
| 2484                     | Q9CR41           | 6                    | 21             | 45                    | 129    | 14679  | 4.9  | Huntingtin-interacting protein K                                                                                                            |
| 2484                     | Q9NX55           | 6                    | 21             | 45                    | 129    | 14665  | 4.9  | Huntingtin-interacting protein K                                                                                                            |
| 2485                     | P62854           | 6                    | 196            | 44.3                  | 115    | 13015  | 11   | 40S ribosomal protein S26 40S ribosomal protein S26                                                                                         |
| 2485                     | UPI00006090BB    | 6                    | 196            | 44.3                  | 115    | 13051  | 10.9 | predicted gene 6654                                                                                                                         |

Table S1. Proteins identified in the OVCAR-3 tumor supernatant by two or more unique peptides.

| Protein or Protein Group | Accession Number | Unique Peptide Count | Spectrum Count | Sequence Coverage (%) | Length | MolWt | pI   | Descriptive Name                                                                                                                                                    |
|--------------------------|------------------|----------------------|----------------|-----------------------|--------|-------|------|---------------------------------------------------------------------------------------------------------------------------------------------------------------------|
| 2485                     | Q5JVH5           | 6                    | 196            | 44.3                  | 115    | 13001 | 11   | Ribosomal protein 26 (RPS26) pseudogene                                                                                                                             |
| 2486                     | B2R4I8           | 6                    | 13             | 43.5                  | 193    | 21705 | 5.4  | cDNA, FLJ92106, highly similar to sapiens adaptor-related protein complex 3, sigma 1 subunit(AP3S1), mRNA                                                           |
| 2486                     | Q92572           | 6                    | 13             | 43.5                  | 193    | 21732 | 5.4  | AP-3 complex subunit sigma-1 AP-3 complex subunit sigma-1                                                                                                           |
| 2487                     | P62253           | 6                    | 14             | 42.9                  | 170    | 19509 | 5.3  | Ubiquitin-conjugating enzyme E2 G1                                                                                                                                  |
| 2488                     | Q08024-4         | 6                    | 22             | 53.4                  | 148    | 17633 | 6    | Isoform 4 of Core-binding factor subunit beta                                                                                                                       |
| 2488                     | A8K719           | 6                    | 22             | 42.2                  | 187    | 21919 | 5.8  | cDNA FLJ76413, highly similar to sapiens core-binding factor, beta subunit (CBFB), transcript variant 1, mRNA                                                       |
| 2488                     | Q13951-2         | 6                    | 22             | 42.2                  | 187    | 21991 | 5.6  | Isoform 2 of Core-binding factor subunit beta                                                                                                                       |
| 2488                     | Q08024           | 6                    | 22             | 42.2                  | 187    | 22030 | 5.8  | Core-binding factor subunit beta                                                                                                                                    |
| 2489                     | UPI0000605000    | 6                    | 24             | 41.9                  | 124    | 14335 | 10.5 | PREDICTED: 60S ribosomal protein L31-like isoform 1                                                                                                                 |
| 2489                     | B2R4C1           | 6                    | 24             | 41.6                  | 125    | 14495 | 10.5 | cDNA, FLJ92036, highly similar to sapiens ribosomal protein L31 (RPL31), mRNA                                                                                       |
| 2489                     | Q9CY93           | 6                    | 24             | 41.6                  | 125    | 14411 | 10.5 | Putative uncharacterized protein                                                                                                                                    |
| 2489                     | P62899           | 6                    | 24             | 41.6                  | 125    | 14463 | 10.5 | 60S ribosomal protein L31 60S ribosomal protein L31                                                                                                                 |
| 2490                     | E4W6B6           | 6                    | 55             | 38.9                  | 126    | 14257 | 10.5 | RPL27/NME2 fusion protein (Fragment)                                                                                                                                |
| 2490                     | B2R4D8           | 6                    | 55             | 36                    | 136    | 15770 | 10.6 | 60S ribosomal protein L27                                                                                                                                           |
| 2490                     | P61353           | 6                    | 55             | 36                    | 136    | 15798 | 10.6 | 60S ribosomal protein L27 60S ribosomal protein L27                                                                                                                 |
| 2491                     | B3KM57           | 6                    | 8              | 31.9                  | 285    | 32773 | 4.9  | cDNA FLJ10347 fis, clone NT2RM2001035, highly similar to CCR4-NOT transcription complex subunit 7                                                                   |
| 2491                     | Q9UIV1           | 6                    | 8              | 31.9                  | 285    | 32745 | 4.8  | CCR4-NOT transcription complex subunit 7                                                                                                                            |
| 2491                     | Q60809           | 6                    | 8              | 31.9                  | 285    | 32718 | 4.8  | CCR4-NOT transcription complex subunit 7                                                                                                                            |
| 2491                     | Q3V231           | 6                    | 8              | 31.9                  | 285    | 32801 | 4.8  | Putative uncharacterized protein                                                                                                                                    |
| 2492                     | P63165           | 6                    | 8              | 45.5                  | 101    | 11557 | 5.5  | Small ubiquitin-related modifier 1 Small ubiquitin-related modifier 1                                                                                               |
| 2492                     | B8ZZN6           | 6                    | 8              | 31.5                  | 146    | 16645 | 6.2  | Uncharacterized protein                                                                                                                                             |
| 2493                     | P62995-3         | 6                    | 41             | 42.6                  | 188    | 21935 | 10.2 | Isoform 3 of Transformer-2 protein log beta                                                                                                                         |
| 2493                     | Q5PR75           | 6                    | 41             | 34.9                  | 229    | 26685 | 11.3 | Sfrs10 protein                                                                                                                                                      |
| 2493                     | Q8N1H4           | 6                    | 41             | 31.7                  | 252    | 29201 | 10.7 | cDNA FLJ40872 fis, clone TUTER2000283, highly similar to sapiens transformer-2-beta (SFRS10) gene                                                                   |
| 2493                     | E7EQD1           | 6                    | 41             | 31.7                  | 252    | 29187 | 10.6 | Uncharacterized protein                                                                                                                                             |
| 2493                     | Q68DZ9           | 6                    | 41             | 29                    | 276    | 32321 | 11.4 | Putative uncharacterized protein DKFZp686F18120 (Fragment)                                                                                                          |
| 2493                     | Q59GA1           | 6                    | 41             | 28.8                  | 278    | 32274 | 11.1 | Splicing factor, arginine/serine-rich 10 (Transformer 2 log, Drosophila) variant (Fragment)                                                                         |
| 2493                     | B2RDQ3           | 6                    | 41             | 27.8                  | 288    | 33682 | 11.2 | cDNA, FLJ96718, highly similar to sapiens splicing factor, arginine/serine-rich 10 (transformer 2 log, Drosophila) (SFRS10), mRNA                                   |
| 2493                     | P62995           | 6                    | 41             | 27.8                  | 288    | 33666 | 11.2 | Transformer-2 protein log beta Transformer-2 protein log beta                                                                                                       |
| 2493                     | E9PD75           | 6                    | 41             | 27.7                  | 289    | 33572 | 10.9 | Uncharacterized protein                                                                                                                                             |
| 2494                     | A2ADR8           | 6                    | 8              | 26.3                  | 350    | 38400 | 7.2  | Protein phosphatase 1, regulatory (Inhibitor) subunit 8                                                                                                             |
| 2494                     | Q8R3G1           | 6                    | 8              | 26.2                  | 351    | 38528 | 7.4  | Nuclear inhibitor of protein phosphatase 1                                                                                                                          |
| 2494                     | Q561W4           | 6                    | 8              | 26.2                  | 351    | 38478 | 7.4  | Protein phosphatase 1, regulatory (Inhibitor) subunit 8                                                                                                             |
| 2494                     | Q12972           | 6                    | 8              | 26.2                  | 351    | 38479 | 7.4  | Nuclear inhibitor of protein phosphatase 1                                                                                                                          |
| 2495                     | A7MAV4           | 6                    | 6              | 26.2                  | 344    | 38273 | 4.9  | UBE2Q1 protein (Fragment)                                                                                                                                           |
| 2495                     | Q7Z7E8           | 6                    | 6              | 21.3                  | 422    | 46127 | 5.1  | Ubiquitin-conjugating enzyme E2 Q1                                                                                                                                  |
| 2495                     | Q7TSS2           | 6                    | 6              | 21.3                  | 422    | 46173 | 5.1  | Ubiquitin-conjugating enzyme E2 Q1                                                                                                                                  |
| 2496                     | Q96DH6-2         | 6                    | 17             | 31.9                  | 251    | 28421 | 8.5  | Isoform 2 of RNA-binding protein Musashi log 2                                                                                                                      |
| 2496                     | Q920Q6-3         | 6                    | 17             | 28.4                  | 282    | 30893 | 9.1  | Isoform 3 of RNA-binding protein Musashi log 2                                                                                                                      |
| 2496                     | Q2MZQ8           | 6                    | 17             | 24.4                  | 328    | 35166 | 8.5  | Msl2h protein                                                                                                                                                       |
| 2496                     | Q96DH6           | 6                    | 17             | 24.4                  | 328    | 35197 | 8.5  | RNA-binding protein Musashi log 2                                                                                                                                   |
| 2496                     | Q920Q6           | 6                    | 17             | 23.1                  | 346    | 36939 | 8.5  | RNA-binding protein Musashi log 2 RNA-binding protein Musashi log 2                                                                                                 |
| 2497                     | Q3UIS6           | 6                    | 14             | 23.2                  | 314    | 36238 | 9    | Putative uncharacterized protein (Fragment)                                                                                                                         |
| 2497                     | A5D8W6           | 6                    | 14             | 22.6                  | 323    | 37261 | 9.1  | Mortality factor 4 like 1                                                                                                                                           |
| 2497                     | UPI0000194F49    | 6                    | 14             | 22.6                  | 323    | 37261 | 9.2  | PREDICTED: predicted gene 6747 isoform 2                                                                                                                            |
| 2497                     | Q569V4           | 6                    | 14             | 22.6                  | 323    | 37231 | 9.2  | MCG125079 MCG125079                                                                                                                                                 |
| 2497                     | Q3UBK1           | 6                    | 14             | 22.6                  | 323    | 37201 | 9.2  | Putative uncharacterized protein                                                                                                                                    |
| 2497                     | B3KTM8           | 6                    | 14             | 21                    | 348    | 40029 | 9.1  | cDNA FLJ38504 fis, clone HCHON2000156, highly similar to Mortality factor 4-like protein 1                                                                          |
| 2498                     | P49615           | 6                    | 6              | 20.9                  | 292    | 33288 | 7.7  | Cyclin-dependent kinase 5                                                                                                                                           |
| 2498                     | Q00535           | 6                    | 6              | 20.9                  | 292    | 33304 | 7.7  | Cyclin-dependent kinase 5                                                                                                                                           |
| 2499                     | Q3TV90           | 6                    | 21             | 26.1                  | 245    | 28130 | 6    | Putative uncharacterized protein (Fragment)                                                                                                                         |
| 2499                     | Q1W6G4           | 6                    | 21             | 19.7                  | 325    | 38405 | 10   | LUC7-like (S. cerevisiae)                                                                                                                                           |
| 2499                     | Q9NQ29           | 6                    | 21             | 17.3                  | 371    | 43728 | 9.9  | Putative RNA-binding protein Luc7-like 1                                                                                                                            |
| 2499                     | Q9CY14           | 6                    | 21             | 17.3                  | 371    | 43934 | 9.9  | Putative RNA-binding protein Luc7-like 1                                                                                                                            |
| 2499                     | Q53G47           | 6                    | 21             | 17.3                  | 371    | 43712 | 10   | LUC7-like isoform b variant (Fragment)                                                                                                                              |
| 2500                     | Q969G3-2         | 6                    | 22             | 20.9                  | 363    | 41780 | 6    | Isoform 2 of SWI/SNF-related matrix-associated actin-dependent regulator of chromatin subfamily E member 1                                                          |
| 2500                     | B4DGM3           | 6                    | 22             | 19.3                  | 393    | 44770 | 4.8  | cDNA FLJ55202, highly similar to SWI/SNF-related matrix-associated actin-dependent regulator of chromatin subfamily E member 1                                      |
| 2500                     | Q969G3           | 6                    | 22             | 18.5                  | 411    | 46649 | 4.9  | SWI/SNF-related matrix-associated actin-dependent regulator of chromatin subfamily E member 1                                                                       |
| 2500                     | Q54941           | 6                    | 22             | 18.5                  | 411    | 46638 | 4.9  | chromatin subfamily E member 1                                                                                                                                      |
| 2501                     | Q6PKC2           | 6                    | 13             | 34.3                  | 236    | 27016 | 8.2  | CROP protein (Fragment)                                                                                                                                             |
| 2501                     | Q86Y74           | 6                    | 13             | 32.3                  | 251    | 28926 | 7    | CROP protein (Fragment)                                                                                                                                             |
| 2501                     | A8K3C5           | 6                    | 13             | 18.8                  | 432    | 51442 | 9.8  | cDNA FLJ77715, highly similar to sapiens cisplatin resistance-associated overexpressed protein(LUC7A), mRNA                                                         |
| 2501                     | Q5SUF2           | 6                    | 13             | 18.8                  | 432    | 51450 | 9.8  | Luc7-like protein 3                                                                                                                                                 |
| 2501                     | Q95232           | 6                    | 13             | 18.8                  | 432    | 51466 | 9.8  | Luc7-like protein 3                                                                                                                                                 |
| 2501                     | Q5SUF2-3         | 6                    | 13             | 17                    | 477    | 56779 | 9.9  | Isoform 3 of Luc7-like protein 3                                                                                                                                    |
| 2501                     | Q5SUF2-2         | 6                    | 13             | 16.5                  | 491    | 58436 | 9.9  | Isoform 2 of Luc7-like protein 3                                                                                                                                    |
| 2502                     | Q9CWU3           | 6                    | 10             | 21.8                  | 367    | 42606 | 5.4  | MCG141011, isoform CRA_b                                                                                                                                            |
| 2502                     | Q56VW8           | 6                    | 10             | 17.9                  | 447    | 51648 | 6.2  | Lung cancer-related protein 9                                                                                                                                       |
| 2502                     | P63151           | 6                    | 10             | 17.9                  | 447    | 51692 | 6.2  | Serine/threonine-protein phosphatase 2A 55 kDa regulatory subunit B alpha isoform Serine/threonine-protein phosphatase 2A 55 kDa regulatory subunit B alpha isoform |
| 2502                     | B4E1T7           | 6                    | 10             | 17.5                  | 457    | 53000 | 6.5  | cDNA FLJ58665, highly similar to Serine/threonine-protein phosphatase 2A 55 kDa regulatory subunit B alpha isoform                                                  |
| 2502                     | Q571J7           | 6                    | 10             | 15.7                  | 509    | 58394 | 7.4  | MCG141011, isoform CRA_e (Fragment)                                                                                                                                 |
| 2503                     | Q9D4J7-2         | 6                    | 34             | 26.8                  | 284    | 32283 | 8.6  | Isoform 2 of PHD finger protein 6                                                                                                                                   |
| 2503                     | B4E0G4           | 6                    | 34             | 23                    | 331    | 37628 | 8.7  | cDNA FLJ60207, highly similar to PHD finger protein 6                                                                                                               |
| 2503                     | Q9D4J7           | 6                    | 34             | 20.9                  | 364    | 41139 | 8.7  | PHD finger protein 6                                                                                                                                                |
| 2503                     | Q8IWS0           | 6                    | 34             | 20.8                  | 365    | 41290 | 8.7  | PHD finger protein 6                                                                                                                                                |
| 2503                     | E9PC97           | 6                    | 34             | 20.8                  | 366    | 41362 | 8.7  | Uncharacterized protein                                                                                                                                             |
| 2503                     | B1B0W7           | 6                    | 34             | 16.9                  | 451    | 51048 | 8.3  | PHD finger protein 6                                                                                                                                                |
| 2504                     | Q96MN4           | 6                    | 51             | 15.5                  | 600    | 62478 | 9.4  | cDNA FLJ32119 fis, clone PEBLM1000034, highly similar to RNA-BINDING PROTEIN EWS                                                                                    |
| 2504                     | B0QYK1           | 6                    | 51             | 15.5                  | 600    | 62508 | 9.4  | Ewing sarcoma breakpoint region 1                                                                                                                                   |
| 2504                     | B0QYK0           | 6                    | 51             | 15                    | 618    | 64929 | 9.4  | Ewing sarcoma breakpoint region 1                                                                                                                                   |
| 2504                     | Q5SUTO           | 6                    | 51             | 15                    | 618    | 64988 | 9.4  | Ewing sarcoma breakpoint region 1                                                                                                                                   |

Table S1. Proteins identified in the OVCAR-3 tumor supernatant by two or more unique peptides.

| Protein or Group | Accession Number | Unique Peptide Count | Spectrum Count | Sequence Coverage (%) | Length | MolWt  | pI  | Descriptive Name                                                                                                           |
|------------------|------------------|----------------------|----------------|-----------------------|--------|--------|-----|----------------------------------------------------------------------------------------------------------------------------|
| 2504             | Q9D2P0           | 6                    | 51             | 14.2                  | 655    | 68462  | 9.3 | Ewing sarcoma breakpoint region 1                                                                                          |
| 2504             | Q96FE8           | 6                    | 51             | 14.2                  | 655    | 68391  | 9.3 | EWSR1 protein                                                                                                              |
| 2504             | Q6NVA3           | 6                    | 51             | 14.2                  | 656    | 68549  | 9.3 | Ewing sarcoma breakpoint region 1                                                                                          |
| 2504             | Q61545           | 6                    | 51             | 14.2                  | 655    | 68418  | 9.3 | RNA-binding protein EWS                                                                                                    |
| 2504             | Q3UI30           | 6                    | 51             | 14.2                  | 655    | 68575  | 9.4 | Putative uncharacterized protein                                                                                           |
| 2504             | Q01844           | 6                    | 51             | 14.2                  | 656    | 68478  | 9.3 | RNA-binding protein EWS                                                                                                    |
| 2504             | Q96MX4           | 6                    | 51             | 14.1                  | 661    | 68966  | 9.3 | Ewing sarcoma breakpoint region 1, isoform CRA_h                                                                           |
| 2504             | Q5SUS9           | 6                    | 51             | 14.1                  | 661    | 69037  | 9.3 | Ewing sarcoma breakpoint region 1<br>cDNA, FLJ94852, highly similar to sapiens eukaryotic translation                      |
| 2505             | B2RAD8           | 6                    | 6              | 13.4                  | 857    | 97244  | 9.2 | initiation factor 2C, 1 (EIF2C1), mRNA                                                                                     |
| 2505             | Q9UL18           | 6                    | 6              | 13.4                  | 857    | 97214  | 9.2 | Protein argonaute-1 Protein argonaute-1                                                                                    |
| 2505             | Q8CJG1           | 6                    | 6              | 13.4                  | 857    | 97101  | 9.1 | Protein argonaute-1                                                                                                        |
| 2505             | E9Q5W9           | 6                    | 6              | 13                    | 884    | 100343 | 9.2 | Uncharacterized protein                                                                                                    |
| 2506             | A5Z217           | 6                    | 81             | 11.1                  | 470    | 53596  | 5.3 | Mutant desmin                                                                                                              |
| 2506             | Q549R9           | 6                    | 81             | 11.1                  | 470    | 53562  | 5.3 | Mutant desmin                                                                                                              |
| 2506             | Q549R8           | 6                    | 81             | 11.1                  | 470    | 53562  | 5.3 | Mutant desmin                                                                                                              |
| 2506             | Q45VM8           | 6                    | 81             | 11.1                  | 470    | 53579  | 5.3 | Mutant desmin                                                                                                              |
| 2506             | Q45VM7           | 6                    | 81             | 11.1                  | 470    | 53584  | 5.3 | Mutant desmin                                                                                                              |
| 2506             | Q45VM6           | 6                    | 81             | 11.1                  | 470    | 53535  | 5.3 | Mutant desmin                                                                                                              |
| 2506             | Q3V2C6           | 6                    | 81             | 11.1                  | 469    | 53514  | 5.4 | Putative uncharacterized protein                                                                                           |
| 2506             | P31001           | 6                    | 81             | 11.1                  | 469    | 53498  | 5.3 | Desmin                                                                                                                     |
| 2506             | P17661           | 6                    | 81             | 11.1                  | 470    | 53536  | 5.3 | Desmin                                                                                                                     |
| 2507             | Q01433-3         | 6                    | 8              | 11.1                  | 760    | 88198  | 6.2 | Isoform Ex1A-3 of AMP deaminase 2                                                                                          |
| 2507             | B4DK50           | 6                    | 8              | 11                    | 761    | 88289  | 6.2 | cDNA FLJ55345, highly similar to AMP deaminase 2 (EC 3.5.4.6)                                                              |
| 2507             | Q9DBT5           | 6                    | 8              | 10.5                  | 798    | 92024  | 6.2 | AMP deaminase 2                                                                                                            |
| 2507             | Q01433-2         | 6                    | 8              | 10.5                  | 798    | 92071  | 6.3 | Isoform Ex1A-2-3 of AMP deaminase 2                                                                                        |
| 2507             | Q01433-4         | 6                    | 8              | 10.4                  | 804    | 92918  | 6.4 | Isoform Ex1B-3 of AMP deaminase 2                                                                                          |
| 2507             | A2AE27           | 6                    | 8              | 10.2                  | 824    | 94696  | 6.5 | Adenosine monophosphate deaminase 2 (Isoform L)                                                                            |
| 2507             | Q01433           | 6                    | 8              | 9.6                   | 879    | 100688 | 6.9 | AMP deaminase 2<br>cDNA, FLJ95309, highly similar to sapiens adenosine monophosphate deaminase 2 (isoform L)(AMPD2), mRNA  |
| 2507             | B2RB47           | 6                    | 8              | 9.6                   | 879    | 100718 | 6.9 | Uncharacterized protein                                                                                                    |
| 2508             | E7EVD1           | 6                    | 16             | 10.6                  | 634    | 72076  | 9.7 | cDNA FLJ50575, highly similar to U4/U6 small nuclear ribonucleoprotein Prp3                                                |
| 2508             | B4DM28           | 6                    | 16             | 10.6                  | 634    | 72104  | 9.7 | cDNA, FLJ93335, highly similar to sapiens PRP3 pre-mRNA                                                                    |
| 2508             | B2R791           | 6                    | 16             | 9.8                   | 683    | 77543  | 9.5 | processing factor 3 log (yeast) (PRPF3), mRNA                                                                              |
| 2508             | Q922U1           | 6                    | 16             | 9.8                   | 683    | 77455  | 9.5 | U4/U6 small nuclear ribonucleoprotein Prp3                                                                                 |
| 2508             | Q53GV6           | 6                    | 16             | 9.8                   | 683    | 77441  | 9.5 | PRP3 pre-mRNA processing factor 3 log (Fragment)                                                                           |
| 2508             | Q3UT19           | 6                    | 16             | 9.8                   | 683    | 77265  | 9.6 | Putative uncharacterized protein                                                                                           |
| 2508             | Q43395-2         | 6                    | 16             | 9.8                   | 682    | 77472  | 9.5 | Isoform 2 of U4/U6 small nuclear ribonucleoprotein Prp3                                                                    |
| 2508             | Q43395           | 6                    | 16             | 9.8                   | 683    | 77529  | 9.5 | U4/U6 small nuclear ribonucleoprotein Prp3                                                                                 |
| 2509             | Q35218           | 6                    | 15             | 9.6                   | 782    | 88383  | 5.1 | Cleavage and polyadenylation specificity factor subunit 2                                                                  |
| 2509             | Q9P210           | 6                    | 15             | 9.6                   | 782    | 88487  | 5.1 | Cleavage and polyadenylation specificity factor subunit 2<br>cDNA FLJ16777 fis, clone BRHIP2029567, highly similar to Cell |
| 2510             | B3KY60           | 6                    | 15             | 9.1                   | 802    | 92277  | 8.2 | division cycle 5-like protein                                                                                              |
| 2510             | Q99459           | 6                    | 15             | 9.1                   | 802    | 92251  | 8.2 | Cell division cycle 5-like protein                                                                                         |
| 2510             | Q6A068           | 6                    | 15             | 9.1                   | 802    | 92190  | 8   | Cell division cycle 5-related protein                                                                                      |
| 2511             | Q561M1           | 6                    | 35             | 62                    | 158    | 17922  | 6.5 | Acp1 protein                                                                                                               |
| 2511             | Q9D358-2         | 6                    | 35             | 62                    | 158    | 17941  | 7   | Isoform 2 of Low molecular weight phosphotyrosine protein phosphatase                                                      |
| 2512             | P07309           | 6                    | 165            | 58.5                  | 147    | 15776  | 6.2 | Transthyretin                                                                                                              |
| 2513             | P56380           | 6                    | 18             | 54.4                  | 147    | 16989  | 6.3 | Bis(5'-nucleosyl)-tetrphosphatase [asymmetrical]                                                                           |
| 2513             | Q3V1C8           | 6                    | 18             | 54.4                  | 147    | 17037  | 6.5 | Putative uncharacterized protein                                                                                           |
| 2514             | Q923D2           | 6                    | 17             | 53.9                  | 206    | 22197  | 7   | Flavin reductase                                                                                                           |
| 2515             | Q62048           | 6                    | 115            | 53.1                  | 130    | 15054  | 5   | Astrocytic phosphoprotein PEA-15                                                                                           |
| 2516             | Q9R257           | 6                    | 12             | 51.6                  | 190    | 21053  | 5.3 | Heme-binding protein 1                                                                                                     |
| 2517             | Q9EPB4           | 6                    | 7              | 50.8                  | 193    | 21459  | 5.4 | Apoptosis-associated speck-like protein containing a CARD                                                                  |
| 2518             | Q9JJH1           | 6                    | 28             | 50.7                  | 148    | 17025  | 8.9 | Ribonuclease 4                                                                                                             |
| 2519             | Q9CQE5           | 6                    | 16             | 49.7                  | 181    | 21151  | 6.8 | Regulator of G-protein signaling 10                                                                                        |
| 2520             | P62897           | 6                    | 23             | 49.5                  | 105    | 11605  | 9.6 | Cytochrome c, somatic                                                                                                      |
| 2520             | UPI0000194F8E    | 6                    | 23             | 49.5                  | 105    | 11695  | 9.6 | UPI0000194F8E UniRef100 entry                                                                                              |
| 2521             | Q9D7X3           | 6                    | 18             | 47                    | 185    | 20472  | 6.5 | Dual specificity protein phosphatase 3                                                                                     |
| 2522             | UPI000019598D    | 6                    | 16             | 46.9                  | 286    | 32910  | 5.6 | PREDICTED: f-actin-capping protein subunit alpha-1-like                                                                    |
| 2522             | Q5RKN9           | 6                    | 16             | 46.9                  | 286    | 32954  | 5.6 | Capping protein (Actin filament) muscle Z-line, alpha 1                                                                    |
| 2522             | Q3UAS2           | 6                    | 16             | 46.9                  | 286    | 32940  | 5.6 | Putative uncharacterized protein                                                                                           |
| 2522             | P47753           | 6                    | 16             | 46.9                  | 286    | 32940  | 5.6 | F-actin-capping protein subunit alpha-1                                                                                    |
| 2522             | E9PWZ5           | 6                    | 16             | 46.2                  | 290    | 33328  | 6.5 | Uncharacterized protein                                                                                                    |
| 2523             | P62869           | 6                    | 22             | 45.8                  | 118    | 13170  | 5   | Transcription elongation factor B polypeptide 2                                                                            |
| 2523             | UPI000019B883    | 6                    | 22             | 45.8                  | 118    | 13167  | 5   | transcription elongation factor B (SIII), polypeptide 2                                                                    |
| 2524             | Q8K4Z3           | 6                    | 14             | 45.7                  | 282    | 30973  | 7.7 | Apoprotein A-I-binding protein                                                                                             |
| 2525             | UPI000154AC1C    | 6                    | 37             | 44.3                  | 115    | 13029  | 11  | PREDICTED: 40S ribosomal protein S26-like                                                                                  |
| 2526             | Q62422           | 6                    | 18             | 42.3                  | 215    | 23783  | 5.7 | Osteoclast-stimulating factor 1                                                                                            |
| 2527             | P97823-2         | 6                    | 13             | 43                    | 221    | 23367  | 6.8 | Isoform 2 of Acyl-protein thioesterase 1                                                                                   |
| 2527             | P97823           | 6                    | 13             | 41.3                  | 230    | 24688  | 6.6 | Acyl-protein thioesterase 1                                                                                                |
| 2528             | Q9CQA1           | 6                    | 8              | 39.4                  | 188    | 20795  | 9.7 | Trafficking protein particle complex subunit 5                                                                             |
| 2529             | Q9CZ82           | 6                    | 15             | 39.4                  | 208    | 23645  | 6.5 | Mediator of RNA polymerase II transcription subunit 18                                                                     |
| 2530             | Q55013           | 6                    | 28             | 38.3                  | 180    | 20302  | 5   | Trafficking protein particle complex subunit 3                                                                             |
| 2531             | D3YW48           | 6                    | 56             | 38.2                  | 241    | 25310  | 5.6 | Uncharacterized protein                                                                                                    |
| 2531             | Q88456           | 6                    | 56             | 34.2                  | 269    | 28463  | 5.6 | Calpain small subunit 1                                                                                                    |
| 2532             | Q9D892           | 6                    | 25             | 37.9                  | 198    | 21897  | 5.9 | Inosine triphosphate pyrophosphatase                                                                                       |
| 2533             | Q3U5I9           | 6                    | 7              | 37.4                  | 270    | 30338  | 6.2 | Putative uncharacterized protein                                                                                           |
| 2533             | Q9R078           | 6                    | 7              | 37.4                  | 270    | 30308  | 6.2 | 5'-AMP-activated protein kinase subunit beta-1                                                                             |
| 2534             | P04938           | 6                    | 8              | 44.4                  | 151    | 17560  | 4.9 | Major urinary proteins 11 and 8 (Fragment)                                                                                 |
| 2534             | A2AKN9           | 6                    | 8              | 37.2                  | 180    | 20648  | 5   | Major urinary protein 4                                                                                                    |
| 2534             | Q58EV3           | 6                    | 8              | 37.2                  | 180    | 20600  | 5.1 | Major urinary protein 1                                                                                                    |
| 2534             | P11588           | 6                    | 8              | 37.2                  | 180    | 20648  | 5.1 | Major urinary protein 1                                                                                                    |
| 2534             | P02762           | 6                    | 8              | 37.2                  | 180    | 20649  | 4.9 | Major urinary protein 6                                                                                                    |
| 2534             | A9R9W0           | 6                    | 8              | 37.2                  | 180    | 20647  | 5.2 | Novel member of the major urinary protein (Mup) gene family                                                                |
| 2534             | A2CEL1           | 6                    | 8              | 37.2                  | 180    | 20634  | 5.1 | Major urinary protein 1                                                                                                    |
| 2534             | A2BIM8           | 6                    | 8              | 37                    | 181    | 20763  | 4.9 | Major urinary protein 16                                                                                                   |
| 2535             | Q8GBB7           | 6                    | 16             | 37                    | 257    | 28600  | 4.9 | Enolase-phosphatase E1                                                                                                     |
| 2536             | E9QN99           | 6                    | 8              | 36.7                  | 210    | 22451  | 6.5 | Uncharacterized protein                                                                                                    |
| 2536             | Q8VCR7           | 6                    | 8              | 36.7                  | 210    | 22451  | 6.3 | Abhydrolase domain-containing protein 14B                                                                                  |
| 2537             | P08074           | 6                    | 11             | 36.1                  | 244    | 25958  | 9   | Carbonyl reductase [NADPH] 2                                                                                               |
| 2538             | B7ZNS9           | 6                    | 22             | 34.9                  | 258    | 27986  | 6.7 | Cfd protein                                                                                                                |
| 2538             | P03953           | 6                    | 22             | 34.7                  | 259    | 28057  | 6.7 | Complement factor D                                                                                                        |
| 2539             | Q09164           | 6                    | 12             | 34.3                  | 251    | 27392  | 6.8 | Extracellular superoxide dismutase [Cu-Zn]                                                                                 |
| 2539             | Q88592           | 6                    | 12             | 34.3                  | 251    | 27393  | 6.7 | Superoxide dismutase [Cu-Zn]                                                                                               |
| 2540             | Q3TAR7           | 6                    | 9              | 34.2                  | 219    | 23398  | 5.1 | Proteasome subunit beta type                                                                                               |
| 2541             | P98086           | 6                    | 13             | 33.1                  | 245    | 25986  | 9.1 | Complement C1q subcomponent subunit A                                                                                      |
| 2541             | Q9DCM6           | 6                    | 13             | 33.1                  | 245    | 25974  | 9.1 | Complement component 1, q subcomponent, alpha polypeptide                                                                  |
| 2541             | Q3UBX7           | 6                    | 13             | 33.1                  | 245    | 26046  | 8.9 | Putative uncharacterized protein                                                                                           |
| 2541             | Q3TXB1           | 6                    | 13             | 33.1                  | 245    | 25975  | 8.9 | Putative uncharacterized protein                                                                                           |

Table S1. Proteins identified in the OVCAR-3 tumor supernatant by two or more unique peptides.

| Protein or Protein Group | Accession Number | Unique Peptide Count | Spectrum Count | Sequence Coverage (%) | Length | MolWt  | pI  | Descriptive Name                                                                      |
|--------------------------|------------------|----------------------|----------------|-----------------------|--------|--------|-----|---------------------------------------------------------------------------------------|
| 2542                     | Q811C8           | 6                    | 8              | 33.5                  | 263    | 27158  | 8.5 | Igfbp7 protein (Fragment)                                                             |
| 2542                     | A0A5E1           | 6                    | 8              | 31.3                  | 281    | 28898  | 8.2 | Insulin-like growth factor binding protein 7                                          |
| 2542                     | Q61581           | 6                    | 8              | 31.3                  | 281    | 28969  | 8.3 | Insulin-like growth factor-binding protein 7                                          |
| 2542                     | Q3UFA6           | 6                    | 8              | 31.2                  | 282    | 29056  | 8.4 | Putative uncharacterized protein                                                      |
| 2543                     | Q99LC8           | 6                    | 16             | 30.8                  | 305    | 33816  | 8.3 | Translation initiation factor eIF-2B subunit alpha                                    |
| 2544                     | Q3TS19           | 6                    | 6              | 30.7                  | 261    | 28331  | 7   | Car1 protein                                                                          |
| 2545                     | W070370          | 6                    | 10             | 30.6                  | 340    | 38438  | 7   | Cathepsin S                                                                           |
| 2545                     | Q8BSZ5           | 6                    | 10             | 30.4                  | 342    | 38707  | 7   | Cathepsin S                                                                           |
| 2545                     | Q3UD32           | 6                    | 10             | 30.3                  | 343    | 38863  | 7.2 | Putative uncharacterized protein                                                      |
| 2546                     | A6H6N4           | 6                    | 13             | 26                    | 289    | 31795  | 6.2 | Four and a half LIM domains 3                                                         |
| 2547                     | Q4VAA2           | 6                    | 19             | 25.3                  | 281    | 29729  | 6.1 | Protein CDV3                                                                          |
| 2548                     | Q9EST5           | 6                    | 10             | 28.3                  | 272    | 31079  | 4   | Acidic leucine-rich nuclear phosphoprotein 32 family member B                         |
| 2548                     | E9QKP8           | 6                    | 10             | 24.4                  | 315    | 35796  | 4.2 | Uncharacterized protein                                                               |
| 2548                     | Q9EST5-2         | 6                    | 10             | 23.4                  | 329    | 37447  | 4.2 | isoform 2 of Acidic leucine-rich nuclear phosphoprotein 32 family member B            |
| 2549                     | P26350           | 6                    | 17             | 23.4                  | 111    | 12254  | 3.8 | Prothymosin alpha                                                                     |
| 2549                     | Q3U6E4           | 6                    | 17             | 23.4                  | 111    | 12325  | 3.8 | Putative uncharacterized protein                                                      |
| 2549                     | Q3UA54           | 6                    | 17             | 15.1                  | 172    | 18688  | 4.1 | Putative uncharacterized protein (Fragment)                                           |
| 2550                     | P47877           | 6                    | 34             | 23                    | 305    | 32847  | 7.6 | Insulin-like growth factor-binding protein 2                                          |
| 2551                     | Q80VJ2           | 6                    | 16             | 22.3                  | 220    | 24325  | 6.6 | Steroid receptor RNA activator 1                                                      |
| 2552                     | Q3U3I6           | 6                    | 7              | 21.6                  | 473    | 52208  | 7   | Putative uncharacterized protein                                                      |
| 2552                     | Q8CAJ7           | 6                    | 7              | 21.6                  | 473    | 52207  | 7.4 | Putative uncharacterized protein                                                      |
| 2552                     | Q56A00           | 6                    | 7              | 21.6                  | 473    | 52207  | 7.3 | Aspartyl aminopeptidase, isoform CRA_a                                                |
| 2553                     | Q3U646           | 6                    | 13             | 20.8                  | 394    | 44598  | 8.6 | Putative uncharacterized protein                                                      |
| 2553                     | Q9VV54           | 6                    | 13             | 20.8                  | 394    | 44670  | 8.5 | Acid ceramidase                                                                       |
| 2553                     | Q3U8A7           | 6                    | 13             | 20.8                  | 394    | 44671  | 8.3 | Putative uncharacterized protein                                                      |
| 2554                     | Q3UUU4           | 6                    | 11             | 20.8                  | 427    | 48787  | 6.6 | Putative uncharacterized protein                                                      |
| 2554                     | Q9R1T4-3         | 6                    | 11             | 20.7                  | 429    | 49058  | 6.6 | Isoform V of Septin-6                                                                 |
| 2554                     | Q9R1T4           | 6                    | 11             | 20.5                  | 434    | 49620  | 6.4 | Septin-6                                                                              |
| 2555                     | UPI00001E53C2    | 6                    | 57             | 24.8                  | 343    | 38502  | 9.2 | lamina-associated polypeptide 2 isoform beta                                          |
| 2555                     | Q61029-4         | 6                    | 57             | 24.8                  | 343    | 38423  | 9.1 | Isoform Gamma of Lamina-associated polypeptide 2, isoforms beta/delta/epsilon/gamma   |
| 2555                     | UPI00004347B2    | 6                    | 57             | 22.4                  | 380    | 42650  | 9.4 | lamina-associated polypeptide 2 isoform gamma                                         |
| 2555                     | Q61029-2         | 6                    | 57             | 22.4                  | 380    | 42572  | 9.4 | Isoform Delta of Lamina-associated polypeptide 2, isoforms beta/delta/epsilon/gamma   |
| 2555                     | Q3TNH0           | 6                    | 57             | 20.6                  | 412    | 46050  | 9.2 | Putative uncharacterized protein                                                      |
| 2555                     | Q61029-3         | 6                    | 57             | 20.6                  | 412    | 45972  | 9.1 | Isoform Epsilon of Lamina-associated polypeptide 2, isoforms beta/delta/epsilon/gamma |
| 2555                     | Q61029           | 6                    | 57             | 18.8                  | 452    | 50295  | 9.4 | Lamina-associated polypeptide 2, isoforms beta/delta/epsilon/gamma                    |
| 2555                     | Q3UR33           | 6                    | 57             | 18.8                  | 452    | 50359  | 9.4 | Putative uncharacterized protein                                                      |
| 2555                     | Q3UCI5           | 6                    | 57             | 18.8                  | 452    | 50373  | 9.4 | Putative uncharacterized protein                                                      |
| 2555                     | Q3U955           | 6                    | 57             | 18.8                  | 452    | 50471  | 9.5 | Putative uncharacterized protein                                                      |
| 2555                     | Q3U7B3           | 6                    | 57             | 18.8                  | 452    | 50502  | 9.4 | Putative uncharacterized protein                                                      |
| 2556                     | Q3UKE5           | 6                    | 10             | 20.2                  | 322    | 36544  | 8.7 | Lectin, galactose binding, soluble 9                                                  |
| 2557                     | Q3TXN1           | 6                    | 11             | 19                    | 315    | 34268  | 5.5 | Putative uncharacterized protein                                                      |
| 2557                     | Q8VDQ1-2         | 6                    | 11             | 19                    | 316    | 34449  | 5.5 | Isoform 2 of Prostaglandin reductase 2                                                |
| 2557                     | Q8VDQ1           | 6                    | 11             | 17.1                  | 351    | 38015  | 5.4 | Prostaglandin reductase 2                                                             |
| 2558                     | P11680           | 6                    | 10             | 18.8                  | 464    | 50327  | 7.8 | Properdin                                                                             |
| 2559                     | Q9DBF1           | 6                    | 13             | 18.2                  | 539    | 58862  | 7.5 | Alpha-aminoadipic semialdehyde dehydrogenase                                          |
| 2560                     | Q8R121-2         | 6                    | 13             | 20.3                  | 394    | 45298  | 5.2 | Isoform 2 of Protein Z-dependent protease inhibitor                                   |
| 2560                     | Q8R121           | 6                    | 13             | 17.9                  | 448    | 51797  | 5.7 | Protein Z-dependent protease inhibitor                                                |
| 2561                     | Q92153           | 6                    | 9              | 17.3                  | 572    | 63998  | 7.3 | Malic enzyme                                                                          |
| 2561                     | Q9DBF9           | 6                    | 9              | 17.3                  | 572    | 63954  | 7.4 | Malic enzyme                                                                          |
| 2562                     | Q78ZA7           | 6                    | 18             | 17.6                  | 375    | 42679  | 4.7 | Nucleosome assembly protein 1-like 4                                                  |
| 2562                     | B7ZNL2           | 6                    | 18             | 17.1                  | 386    | 43935  | 4.7 | Nap114 protein                                                                        |
| 2562                     | E9Q6R0           | 6                    | 18             | 15.7                  | 421    | 47275  | 4.7 | Uncharacterized protein                                                               |
| 2562                     | Q8C1W9           | 6                    | 18             | 15.6                  | 422    | 47362  | 4.7 | Putative uncharacterized protein                                                      |
| 2563                     | UPI0001E6B84E    | 6                    | 40             | 16.7                  | 443    | 50001  | 5   | PREDICTED: tubulin beta-3 chain-like                                                  |
| 2564                     | P23591           | 6                    | 15             | 16.5                  | 321    | 35878  | 6.7 | GDP-L-fucose synthase                                                                 |
| 2565                     | P29788           | 6                    | 15             | 15.7                  | 478    | 54849  | 5.9 | Vitronectin                                                                           |
| 2566                     | Q8K0J4           | 6                    | 13             | 18.9                  | 387    | 43335  | 5.3 | Epidermal growth factor-containing fibulin-like extracellular matrix protein 1        |
| 2566                     | Q8BPB5           | 6                    | 13             | 14.8                  | 493    | 54953  | 5.1 | EGF-containing fibulin-like extracellular matrix protein 1                            |
| 2567                     | Q3UJS6           | 6                    | 12             | 14.1                  | 533    | 59615  | 5.9 | Putative uncharacterized protein                                                      |
| 2567                     | Q8BT60           | 6                    | 12             | 14.1                  | 533    | 59585  | 5.8 | Copine-3                                                                              |
| 2568                     | P48025           | 6                    | 7              | 13.8                  | 629    | 71376  | 7.9 | Tyrosine-protein kinase SYK                                                           |
| 2568                     | Q6P1E0           | 6                    | 7              | 13.8                  | 629    | 71342  | 7.9 | Syk protein                                                                           |
| 2569                     | Q80YC5           | 6                    | 25             | 13.7                  | 597    | 65701  | 6.8 | Coagulation factor XII                                                                |
| 2570                     | Q9JKV1           | 6                    | 17             | 13.3                  | 407    | 42060  | 5.1 | Proteasomal ubiquitin receptor ADRM1                                                  |
| 2571                     | E9QLP8           | 6                    | 63             | 13.2                  | 461    | 49404  | 5   | Uncharacterized protein                                                               |
| 2572                     | Q8BND5-2         | 6                    | 19             | 12.3                  | 661    | 73297  | 6.9 | Isoform 2 of Sulfhydryl oxidase 1                                                     |
| 2572                     | Q8BND5           | 6                    | 19             | 10.8                  | 748    | 82785  | 7.2 | Sulfhydryl oxidase 1                                                                  |
| 2573                     | Q9Z1T2           | 6                    | 7              | 9.4                   | 963    | 106366 | 4.7 | Thrombospondin-4                                                                      |
| 2574                     | P46935           | 6                    | 10             | 9                     | 887    | 102706 | 5.3 | E3 ubiquitin-protein ligase NEDD4                                                     |
| 2575                     | Q8VI75           | 6                    | 20             | 7.9                   | 1082   | 119275 | 5   | Importin-4                                                                            |
| 2576                     | A6H8H2           | 6                    | 14             | 4.1                   | 1906   | 211456 | 6.4 | Denn4c protein                                                                        |
| 2576                     | A2AJX5           | 6                    | 14             | 4                     | 1955   | 216453 | 6.2 | DENN/MADD domain containing 4C                                                        |
| 2577                     | Q91ZU6-2         | 6                    | 8              | 3.1                   | 5380   | 614934 | 5.7 | Isoform 1 of Dystonin                                                                 |
| 2577                     | E9QL23           | 6                    | 8              | 3.1                   | 5379   | 615221 | 5.7 | Uncharacterized protein                                                               |
| 2577                     | E9PXE4           | 6                    | 8              | 2.2                   | 7359   | 829857 | 5.3 | Uncharacterized protein                                                               |
| 2577                     | Q91ZU6-4         | 6                    | 8              | 2.2                   | 7402   | 835096 | 5.3 | Isoform 4 of Dystonin                                                                 |
| 2577                     | Q91ZU6           | 6                    | 8              | 2.2                   | 7389   | 833654 | 5.3 | Dystonin                                                                              |
| 2577                     | E9PXE5           | 6                    | 8              | 2.2                   | 7393   | 834234 | 5.3 | Uncharacterized protein                                                               |
| 2578                     | P0CG13           | 6                    | 13             | 81                    | 121    | 13314  | 8.2 | Chromosome transmission fidelity protein 8 log                                        |
| 2578                     | UPI0001E8F538    | 6                    | 13             | 68.1                  | 144    | 15356  | 9.1 | UPI0001E8F538 UniRef100 entry                                                         |
| 2579                     | P35244           | 6                    | 29             | 80.2                  | 121    | 13569  | 5.1 | Replication protein A 14 kDa subunit                                                  |
| 2580                     | P52758           | 6                    | 34             | 73                    | 137    | 14494  | 8.7 | Ribonuclease UK114                                                                    |
| 2581                     | Q9UI30           | 6                    | 51             | 72                    | 125    | 14199  | 5.3 | tRNA methyltransferase 112 log                                                        |
| 2582                     | Q9UK76           | 6                    | 40             | 70.8                  | 154    | 16015  | 5.6 | Hematological and neurological expressed 1 protein                                    |
| 2583                     | Q9UK45           | 6                    | 22             | 65                    | 103    | 11602  | 5.3 | U6 snRNA-associated Sm-like protein LSM7                                              |
| 2584                     | Q96FO6           | 6                    | 107            | 64.1                  | 103    | 11801  | 6.8 | Protein S100-A16                                                                      |
| 2585                     | P47929           | 6                    | 32             | 60.3                  | 136    | 15075  | 7.6 | Galectin-7                                                                            |
| 2586                     | P50238           | 6                    | 34             | 59.7                  | 77     | 8533   | 8.8 | Cysteine-rich protein 1                                                               |
| 2587                     | Q9BYN0           | 6                    | 12             | 56.9                  | 137    | 14259  | 8.2 | Sulfiredoxin-1                                                                        |
| 2588                     | P99999           | 6                    | 34             | 55.2                  | 105    | 11749  | 9.6 | Cytochrome c                                                                          |
| 2589                     | Q95994           | 6                    | 17             | 54.9                  | 175    | 19979  | 9   | Anterior gradient protein 2 log                                                       |
| 2589                     | Q53G64           | 6                    | 17             | 54.9                  | 175    | 19963  | 9   | Anterior gradient 2 log (Fragment)                                                    |
| 2590                     | P09132           | 6                    | 28             | 54.9                  | 144    | 16156  | 9.8 | Signal recognition particle 19 kDa protein                                            |
| 2591                     | Q9NX24           | 6                    | 13             | 54.2                  | 153    | 17201  | 8.2 | H/ACA ribonucleoprotein complex subunit 2                                             |
| 2592                     | A8MQB6           | 6                    | 17             | 52.5                  | 183    | 21124  | 5.3 | Uncharacterized protein                                                               |
| 2592                     | Q9NX08           | 6                    | 17             | 52.5                  | 183    | 21090  | 5.4 | COMM domain-containing protein 8                                                      |
| 2593                     | Q13526           | 6                    | 46             | 51.5                  | 163    | 18243  | 8.8 | Peptidyl-prolyl cis-trans isomerase NIMA-interacting 1                                |
| 2594                     | O75348           | 6                    | 24             | 50.8                  | 118    | 13758  | 8.8 | V-type proton ATPase subunit G 1                                                      |

Table S1. Proteins identified in the OVCAR-3 tumor supernatant by two or more unique peptides.

| Protein or Protein Group | Accession Number | Unique Peptide Count | Spectrum Count | Sequence Coverage (%) | Length | MolWt | pI   | Descriptive Name                                                                                                                                           |
|--------------------------|------------------|----------------------|----------------|-----------------------|--------|-------|------|------------------------------------------------------------------------------------------------------------------------------------------------------------|
| 2595                     | P02144           | 6                    | 8              | 50.6                  | 154    | 17184 | 7.7  | Myoglobin                                                                                                                                                  |
| 2596                     | Q04837           | 6                    | 14             | 50                    | 148    | 17260 | 9.6  | Single-stranded DNA-binding protein, mitochondrial                                                                                                         |
| 2596                     | Q567R6           | 6                    | 14             | 50                    | 148    | 17359 | 9.7  | Single-stranded DNA binding protein 1                                                                                                                      |
| 2597                     | P63302           | 6                    | 9              | 49.4                  | 87     | 9298  | 9.2  | Selenoprotein W                                                                                                                                            |
| 2597                     | UPI000179AE55    | 6                    | 9              | 48.3                  | 89     | 9628  | 9.2  | Selenoprotein W.                                                                                                                                           |
| 2598                     | Q9UHV9           | 6                    | 56             | 48.7                  | 154    | 16648 | 6.6  | Prefoldin subunit 2                                                                                                                                        |
| 2599                     | A0PJ62           | 6                    | 59             | 48.4                  | 124    | 14611 | 10.6 | RPL14 protein (Fragment)                                                                                                                                   |
| 2599                     | E7EPB3           | 6                    | 59             | 48.4                  | 124    | 14558 | 10.2 | Uncharacterized protein                                                                                                                                    |
| 2599                     | B7Z6S8           | 6                    | 59             | 46.9                  | 128    | 15083 | 10.7 | cDNA FLJ51325, highly similar to 60S ribosomal protein L14                                                                                                 |
| 2599                     | P50914           | 6                    | 59             | 27.9                  | 215    | 23432 | 10.9 | 60S ribosomal protein L14                                                                                                                                  |
|                          |                  |                      |                |                       |        |       |      | cDNA FLJ75556, highly similar to sapiens ribosomal protein L14, mRNA                                                                                       |
| 2599                     | A8K7N0           | 6                    | 59             | 27.5                  | 218    | 23646 | 10.8 | mRNA                                                                                                                                                       |
| 2599                     | Q6IPH7           | 6                    | 59             | 27.3                  | 220    | 23787 | 10.9 | RPL14 protein                                                                                                                                              |
| 2600                     | Q9NP97           | 6                    | 30             | 74                    | 96     | 10922 | 7.2  | Dynein light chain roadblock-type 1                                                                                                                        |
| 2600                     | B1AKR6           | 6                    | 30             | 48                    | 148    | 16253 | 7    | Dynein, light chain, roadblock-type 1                                                                                                                      |
| 2601                     | E9PRR8           | 6                    | 8              | 47.9                  | 146    | 16748 | 6.1  | Uncharacterized protein                                                                                                                                    |
| 2601                     | Q8N9N8           | 6                    | 8              | 42.4                  | 165    | 19053 | 5.2  | Probable RNA-binding protein EIF1AD                                                                                                                        |
| 2602                     | Q4LDG9           | 6                    | 8              | 47.4                  | 190    | 21533 | 6.1  | Dynein light chain 1, axonemal                                                                                                                             |
| 2603                     | Q96007           | 6                    | 14             | 47.3                  | 188    | 20944 | 5.4  | Molybdopterine synthase catalytic subunit                                                                                                                  |
| 2604                     | Q6FHL9           | 6                    | 125            | 53.1                  | 130    | 15068 | 5    | PEA15 protein                                                                                                                                              |
| 2604                     | Q15121           | 6                    | 125            | 53.1                  | 130    | 15040 | 5    | Astrocytic phosphoprotein PEA-15                                                                                                                           |
| 2604                     | B1AKZ3           | 6                    | 125            | 45.7                  | 151    | 17307 | 4.9  | Phosphoprotein enriched in astrocytes 15                                                                                                                   |
| 2605                     | P07108           | 6                    | 28             | 50.6                  | 87     | 10044 | 6.5  | Acyl-CoA-binding protein                                                                                                                                   |
| 2605                     | P07108-3         | 6                    | 28             | 50                    | 88     | 10145 | 6.5  | Isoform 3 of Acyl-CoA-binding protein                                                                                                                      |
| 2605                     | B8ZWD1           | 6                    | 28             | 45.4                  | 97     | 11150 | 8.3  | Diazepam binding inhibitor, splice form 1A(2)                                                                                                              |
|                          |                  |                      |                |                       |        |       |      | Diazepam binding inhibitor (GABA receptor modulator, acyl-Coenzyme A binding protein), isoform CRA_a                                                       |
| 2605                     | B8ZWD2           | 6                    | 28             | 42.3                  | 104    | 11793 | 5.5  | Diazepam binding inhibitor, splice form 1A(1)-G                                                                                                            |
| 2605                     | B8ZWD7           | 6                    | 28             | 34.1                  | 129    | 14367 | 9.4  | Diazepam binding inhibitor, splice form 1D(2)                                                                                                              |
| 2605                     | B8ZWD9           | 6                    | 28             | 30.6                  | 144    | 15959 | 5    | Diazepam binding inhibitor, splice form 1G                                                                                                                 |
| 2605                     | B8ZWD6           | 6                    | 28             | 29.7                  | 148    | 16495 | 9.4  | Diazepam binding inhibitor, splice form 1G                                                                                                                 |
| 2606                     | Q9H7C9           | 6                    | 32             | 52.5                  | 122    | 13332 | 8.4  | UPF0366 protein C11orf67                                                                                                                                   |
| 2606                     | E9PNP3           | 6                    | 32             | 45.4                  | 141    | 15588 | 9.1  | Uncharacterized protein                                                                                                                                    |
| 2607                     | Q9Y4Z0           | 6                    | 44             | 45.3                  | 139    | 15350 | 10   | U6 snRNA-associated Sm-like protein LSM4                                                                                                                   |
| 2608                     | Q53FT3           | 6                    | 13             | 45.2                  | 197    | 21628 | 5.5  | Uncharacterized protein C11orf73                                                                                                                           |
|                          |                  |                      |                |                       |        |       |      | cDNA FLJ75700, highly similar to sapiens complement component 1, q subcomponent binding protein (C1QBP), nuclear gene encoding mitochondrial protein, mRNA |
| 2609                     | A8K651           | 6                    | 7              | 45                    | 282    | 31380 | 4.8  | Complement component 1 Q subcomponent-binding protein, mitochondrial                                                                                       |
| 2609                     | Q07021           | 6                    | 7              | 45                    | 282    | 31362 | 4.8  | ADP-ribosylation factor-like protein 2                                                                                                                     |
| 2610                     | P36404           | 6                    | 11             | 44.6                  | 184    | 20878 | 6.4  | cDNA, FLJ92050, highly similar to sapiens actin related protein 2/3 complex, subunit 3, 21kDa (ARPC3), mRNA                                                |
| 2611                     | B2R4D5           | 6                    | 45             | 44.4                  | 178    | 20521 | 8.6  | Actin-related protein 2/3 complex subunit 3 (ARP2/3 complex 21 kDa subunit) (p21-ARC).                                                                     |
| 2611                     | UPI00015DFF36    | 6                    | 45             | 44.4                  | 178    | 20529 | 8.6  | Actin-related protein 2/3 complex subunit 3                                                                                                                |
| 2611                     | O15145           | 6                    | 45             | 44.4                  | 178    | 20547 | 8.6  | 3'-5' exoribonuclease CSL4 log                                                                                                                             |
| 2612                     | Q9Y3B2           | 6                    | 8              | 43.1                  | 195    | 21452 | 8.2  | cDNA FLJ77896, highly similar to sapiens Ras log enriched in brain (RHEB), mRNA                                                                            |
| 2613                     | A8K005           | 6                    | 14             | 42.4                  | 184    | 20465 | 5.9  | Ras log enriched in brain                                                                                                                                  |
| 2613                     | Q6NZ61           | 6                    | 14             | 42.4                  | 184    | 20558 | 5.9  | GTP-binding protein Rheb                                                                                                                                   |
| 2613                     | Q15382           | 6                    | 14             | 42.4                  | 184    | 20497 | 5.9  | Probable 7,8-dihydro-8-oxoguanine triphosphatase NUDT15                                                                                                    |
| 2614                     | Q9NV35           | 6                    | 12             | 42.1                  | 164    | 18609 | 6.1  | Protein S100-A8                                                                                                                                            |
| 2615                     | P05109           | 6                    | 17             | 41.9                  | 93     | 10834 | 7    | Centrin-2                                                                                                                                                  |
| 2616                     | P41208           | 6                    | 15             | 41.9                  | 172    | 19738 | 5    | E3 ubiquitin-protein ligase RNF181                                                                                                                         |
| 2617                     | Q9P0P0           | 6                    | 11             | 41.8                  | 153    | 17909 | 5    | Mediator of RNA polymerase II transcription subunit 20                                                                                                     |
| 2618                     | Q9H944           | 6                    | 12             | 41.5                  | 212    | 23222 | 6.9  | Centromere protein S                                                                                                                                       |
| 2619                     | Q8NZ29           | 6                    | 6              | 41.3                  | 138    | 15893 | 6    | GATS-like protein 3                                                                                                                                        |
| 2620                     | Q8WXT7           | 6                    | 6              | 41                    | 329    | 36275 | 5.2  | Exosome complex exonuclease RRP46                                                                                                                          |
| 2621                     | Q9NQT4           | 6                    | 8              | 40.9                  | 235    | 25249 | 7.6  | Ras-related protein R-Ras                                                                                                                                  |
| 2622                     | P10301           | 6                    | 13             | 40.4                  | 218    | 23480 | 6.9  | Ras-related protein Ral-B                                                                                                                                  |
| 2623                     | Q4R379           | 6                    | 17             | 44.2                  | 206    | 23379 | 6.6  | Ras-related protein Ral-B                                                                                                                                  |
| 2623                     | P11234           | 6                    | 17             | 44.2                  | 206    | 23409 | 6.6  | cDNA FLJ55177, highly similar to Ras-related protein Ral-B                                                                                                 |
| 2623                     | B4E040           | 6                    | 17             | 39.9                  | 228    | 25966 | 7.8  | 5-formyltetrahydrofolate cyclo-ligase                                                                                                                      |
| 2624                     | P49914           | 6                    | 10             | 39.9                  | 203    | 23256 | 7.9  | DNA replication complex GINS protein PSF3                                                                                                                  |
| 2625                     | Q9BRX5           | 6                    | 8              | 39.8                  | 216    | 24535 | 5.3  | HemK methyltransferase family member 2, isoform CRA_a                                                                                                      |
| 2626                     | B2RA97           | 6                    | 8              | 39.7                  | 214    | 22957 | 5.1  | Hematological and neurological expressed 1-like protein                                                                                                    |
| 2627                     | Q9H910           | 6                    | 13             | 45.3                  | 190    | 20063 | 9.3  | cDNA FLJ53622, highly similar to Hematological and neurological expressed1-like protein                                                                    |
|                          |                  |                      |                |                       |        |       |      | Exosome complex exonuclease RRP40                                                                                                                          |
| 2627                     | B4DLH4           | 6                    | 13             | 39.4                  | 218    | 23026 | 9.6  | cDNA FLJ32419 fis, clone SKMUS2000894, highly similar to Ribosylidihydrocorticinamide dehydrogenase                                                        |
| 2628                     | Q9NQT5           | 6                    | 7              | 39.3                  | 275    | 29572 | 6    | Ribosylidihydrocorticinamide dehydrogenase [quinone]                                                                                                       |
| 2629                     | B3KPX6           | 6                    | 7              | 39                    | 231    | 25949 | 6.3  | Prefoldin subunit 4                                                                                                                                        |
| 2629                     | P16083           | 6                    | 7              | 39                    | 231    | 25919 | 4.5  | Isoform 3 of Dynactin subunit 3                                                                                                                            |
| 2630                     | Q9NQP4           | 6                    | 30             | 38.8                  | 134    | 15314 | 6    | Dynactin subunit 3                                                                                                                                         |
| 2631                     | O75935-3         | 6                    | 12             | 45.6                  | 158    | 18001 | 5.5  | cDNA, FLJ96690, highly similar to sapiens glutathione transferase zeta 1 (maleylacetoacetate isomerase) (GSTZ1), transcript variant 1, mRNA                |
| 2631                     | O75935           | 6                    | 12             | 38.7                  | 186    | 21119 | 5    | Trafficking protein particle complex subunit 3                                                                                                             |
|                          |                  |                      |                |                       |        |       |      | Alpha N-terminal protein methyltransferase 1A                                                                                                              |
| 2632                     | B2RDN1           | 6                    | 18             | 38.4                  | 216    | 24126 | 7.7  | Ras-related protein Rab-13                                                                                                                                 |
| 2633                     | O43617           | 6                    | 30             | 38.3                  | 180    | 20274 | 9.2  | RAB13 protein (Fragment)                                                                                                                                   |
| 2634                     | Q9BV86           | 6                    | 7              | 38.1                  | 223    | 25387 | 8.9  | Nucleolar protein 3 (Apoptosis repressor with CARD domain)                                                                                                 |
| 2635                     | P51153           | 6                    | 13             | 37.9                  | 203    | 22774 | 4.2  | Nucleolar protein 3 (Apoptosis repressor with CARD domain), isoform CRA_a                                                                                  |
| 2635                     | Q504R6           | 6                    | 13             | 31.6                  | 244    | 27199 | 6.7  | UPF0556 protein C19orf10                                                                                                                                   |
| 2636                     | Q5TZN6           | 6                    | 10             | 48.6                  | 208    | 22629 | 7.5  | Uncharacterized protein                                                                                                                                    |
|                          |                  |                      |                |                       |        |       |      | Thioredoxin-dependent peroxide reductase, mitochondrial                                                                                                    |
| 2636                     | B4DFL0           | 6                    | 10             | 37.4                  | 270    | 29355 | 4.9  | Ras-related protein Rab-3D                                                                                                                                 |
| 2637                     | Q969H8           | 6                    | 25             | 37                    | 173    | 18795 | 4.4  | Reticulocalbin-2                                                                                                                                           |
| 2638                     | E9PH29           | 6                    | 15             | 36.1                  | 238    | 25839 | 4.5  | Reticulocalbin-2 precursor (Calcium-binding protein ERC-55) (E6-binding protein) (E6BP).                                                                   |
| 2638                     | P30048           | 6                    | 15             | 33.6                  | 256    | 27693 | 8.6  | cDNA FLJ50431, highly similar to Discs large log 3                                                                                                         |
| 2638                     | P30049           | 6                    | 15             | 36.1                  | 219    | 24267 | 9.2  | Discs, large log 3 (Neuroendocrine-dlg, Drosophila)                                                                                                        |
| 2639                     | Q95716           | 6                    | 10             | 36.1                  | 219    | 24267 | 5.1  | NUDT1 protein                                                                                                                                              |
| 2640                     | Q14257           | 6                    | 7              | 35.6                  | 317    | 36876 | 5.3  | 7,8-dihydro-8-oxoguanine triphosphatase                                                                                                                    |
|                          |                  |                      |                |                       |        |       |      | cDNA FLJ77120, highly similar to sapiens replication factor C (activator 1) 5, 36.5kDa (RFC5), transcript variant 2, mRNA                                  |
| 2640                     | UPI000041D59E    | 6                    | 7              | 33.7                  | 335    | 39139 | 6.5  | Uncharacterized protein                                                                                                                                    |
| 2641                     | B4E0H1           | 6                    | 18             | 35                    | 366    | 42112 | 6.9  | Uncharacterized protein                                                                                                                                    |
| 2641                     | Q5JUW6           | 6                    | 18             | 25                    | 512    | 57937 | 6.9  | RFC5 protein (Fragment)                                                                                                                                    |
| 2642                     | Q7Z7N6           | 6                    | 23             | 44.2                  | 156    | 17951 | 7.2  | Replication factor C subunit 5                                                                                                                             |
| 2642                     | P36639           | 6                    | 23             | 35                    | 197    | 22520 | 7.8  | Replication factor C 5 isoform 1 variant (Fragment)                                                                                                        |
| 2643                     | A8K4Z2           | 6                    | 7              | 34.9                  | 255    | 28786 | 6.5  | Uncharacterized protein                                                                                                                                    |
| 2643                     | E9PBA2           | 6                    | 7              | 34.9                  | 255    | 28846 | 6.5  | Uncharacterized protein                                                                                                                                    |
| 2643                     | A8M262           | 6                    | 7              | 27.9                  | 319    | 36105 | 6.9  | Uncharacterized protein                                                                                                                                    |
| 2643                     | Q6LE59           | 6                    | 7              | 26.2                  | 340    | 38397 | 6.9  | Replication factor C subunit 5                                                                                                                             |
| 2643                     | P40937           | 6                    | 7              | 26.2                  | 340    | 38497 | 7.2  | Replication factor C 5 isoform 1 variant (Fragment)                                                                                                        |
| 2643                     | Q59GW7           | 6                    | 7              | 25.4                  | 351    | 39643 | 7.8  | Replication factor C 5 isoform 1 variant (Fragment)                                                                                                        |



Table S1. Proteins identified in the OVCAR-3 tumor supernatant by two or more unique peptides.

| Protein or<br>Group | Accession Number | Unique<br>Peptide<br>Count | Spectrum<br>Count | Sequence<br>Coverage (%) | Length | MolWt | pI   | Descriptive Name                                                                                                  |
|---------------------|------------------|----------------------------|-------------------|--------------------------|--------|-------|------|-------------------------------------------------------------------------------------------------------------------|
| 2644                | Q9NVT9           | 6                          | 10                | 34.8                     | 282    | 31281 | 5.8  | Armadillo repeat-containing protein 1                                                                             |
| 2645                | Q969J3           | 6                          | 6                 | 34.7                     | 196    | 22222 | 6.4  | Loss of heterozygosity 12 chromosomal region 1 protein                                                            |
| 2646                | Q9NWS0           | 6                          | 6                 | 34.5                     | 290    | 32363 | 5.1  | PIH1 domain-containing protein 1                                                                                  |
| 2647                | O60344-4         | 6                          | 6                 | 34.1                     | 255    | 28306 | 6.1  | Isoform D of Endothelin-converting enzyme 2                                                                       |
| 2648                | Q96S19           | 6                          | 9                 | 33.8                     | 204    | 22578 | 7.8  | UPF0585 protein C16orf13                                                                                          |
| 2649                | Q15628           | 6                          | 7                 | 33.7                     | 312    | 34247 | 6.3  | Tumor necrosis factor receptor type 1-associated DEATH domain protein                                             |
| 2650                | O75391           | 6                          | 6                 | 33.5                     | 227    | 26034 | 7.9  | Sperm-associated antigen 7                                                                                        |
| 2651                | E9PNY1           | 6                          | 19                | 33.3                     | 207    | 22686 | 6.5  | Uncharacterized protein                                                                                           |
| 2651                | Q95159           | 6                          | 19                | 22.3                     | 310    | 34114 | 8.1  | Zinc finger protein-like 1                                                                                        |
| 2652                | P35270           | 6                          | 16                | 33.3                     | 261    | 28048 | 8    | Sepiapterin reductase                                                                                             |
| 2653                | A8K5R6           | 6                          | 23                | 32.8                     | 250    | 28609 | 9.4  | cDNA FLJ77138, highly similar to sapiens golgi SNAP receptor complex member 1 (GOSR1), transcript variant 1, mRNA |
| 2653                | Q95249           | 6                          | 23                | 32.8                     | 250    | 28613 | 9.4  | Golgi SNAP receptor complex member 1                                                                              |
| 2654                | Q13442           | 6                          | 36                | 32.6                     | 181    | 20630 | 8.9  | 28 kDa heat- and acid-stable phosphoprotein                                                                       |
| 2655                | Q9NPD8           | 6                          | 7                 | 32.5                     | 197    | 22521 | 8    | Ubiquitin-conjugating enzyme E2 T                                                                                 |
| 2656                | C9JXB9           | 6                          | 6                 | 32                       | 244    | 26884 | 5.1  | Uncharacterized protein                                                                                           |
| 2656                | P25686           | 6                          | 6                 | 24.1                     | 324    | 35580 | 6    | DnaJ log subfamily B member 2                                                                                     |
| 2657                | B7Z472           | 6                          | 9                 | 31.7                     | 309    | 35377 | 5.9  | cDNA FLJ51987, highly similar to sapiens queuine tRNA-ribosyltransferase domain containing 1 (QTRTD1), mRNA       |
| 2657                | Q9H974           | 6                          | 9                 | 23.6                     | 415    | 46713 | 6.8  | Queuine tRNA-ribosyltransferase subunit QTRTD1                                                                    |
| 2658                | O14732-2         | 6                          | 19                | 34.5                     | 261    | 28512 | 7    | Isoform 2 of Inositol monophosphatase 2                                                                           |
| 2658                | O14732           | 6                          | 19                | 31.2                     | 288    | 31321 | 6.6  | Inositol monophosphatase 2                                                                                        |
| 2659                | Q9BV20-2         | 6                          | 7                 | 35.7                     | 322    | 34529 | 5.7  | Isoform 2 of Methylthioribose-1-phosphate isomerase                                                               |
| 2659                | Q9BV20           | 6                          | 7                 | 31.2                     | 369    | 39150 | 6.3  | Methylthioribose-1-phosphate isomerase                                                                            |
| 2660                | Q9BY43           | 6                          | 6                 | 31.1                     | 222    | 25098 | 4.7  | Charged multivesicular body protein 4a                                                                            |
| 2661                | Q5JTE4           | 6                          | 8                 | 34.1                     | 314    | 35838 | 5.7  | Polymerase (RNA) I polypeptide C, 30kDa                                                                           |
| 2661                | O15160-2         | 6                          | 8                 | 31.3                     | 342    | 38647 | 6    | Isoform 2 of DNA-directed RNA polymerases I and III subunit RPAC1                                                 |
| 2661                | O15160           | 6                          | 8                 | 30.9                     | 346    | 39250 | 5.5  | DNA-directed RNA polymerases I and III subunit RPAC1                                                              |
| 2662                | Q8N4P3           | 6                          | 7                 | 30.2                     | 179    | 20329 | 6.7  | Guanosine-3',5'-bis(diphosphate) 3'-pyrophosphohydrolase MESH1                                                    |
| 2663                | Q96CT7           | 6                          | 14                | 30                       | 223    | 25835 | 9.5  | Coiled-coil domain-containing protein 124                                                                         |
| 2664                | P29966           | 6                          | 35                | 29.5                     | 332    | 31555 | 4.4  | Myristoylated alanine-rich C-kinase substrate                                                                     |
| 2665                | P22352           | 6                          | 37                | 29.2                     | 226    | 25402 | 8.1  | Glutathione peroxidase 3                                                                                          |
| 2666                | O75569-2         | 6                          | 9                 | 30.1                     | 302    | 33123 | 8.4  | Isoform 2 of Interferon-inducible double stranded RNA-dependent protein kinase activator A                        |
| 2666                | O75569           | 6                          | 9                 | 29.1                     | 313    | 34404 | 8.4  | Interferon-inducible double stranded RNA-dependent protein kinase activator A                                     |
| 2667                | Q5QPP2           | 6                          | 8                 | 50.8                     | 195    | 21490 | 6.8  | UDP-galactose-4-epimerase (Fragment)                                                                              |
| 2667                | Q14376           | 6                          | 8                 | 28.4                     | 348    | 38282 | 6.7  | UDP-glucose 4-epimerase                                                                                           |
| 2668                | P14649           | 6                          | 21                | 30.3                     | 208    | 22764 | 5.7  | Myosin light chain 6B                                                                                             |
| 2668                | B4E368           | 6                          | 21                | 28.3                     | 223    | 24541 | 9.7  | cDNA FLJ60058, highly similar to Myosin light chain 1, slow-twitch muscle A isoform                               |
| 2669                | B2RBQ4           | 6                          | 7                 | 28.2                     | 333    | 37151 | 6.1  | responsive muscle(ANKRD2), mRNA                                                                                   |
| 2669                | Q9GZV1           | 6                          | 7                 | 26.1                     | 360    | 39859 | 6.1  | Ankyrin repeat domain-containing protein 2                                                                        |
| 2670                | Q92522           | 6                          | 37                | 28.2                     | 213    | 22487 | 10.8 | Histone H1x                                                                                                       |
| 2671                | Q9NRN9           | 6                          | 10                | 28.2                     | 209    | 23719 | 6.7  | Methyltransferase-like protein 5                                                                                  |
| 2672                | B2RD36           | 6                          | 13                | 27.8                     | 245    | 28058 | 6.8  | cDNA, FLJ96437                                                                                                    |
| 2672                | Q96DG6           | 6                          | 13                | 27.8                     | 245    | 28048 | 7.2  | Carboxymethylenebutenolidase log                                                                                  |
| 2673                | Q9BUT1           | 6                          | 8                 | 27.8                     | 245    | 26724 | 7.6  | 3-hydroxybutyrate dehydrogenase type 2                                                                            |
| 2674                | Q7LG56           | 6                          | 8                 | 27.1                     | 351    | 40737 | 5    | Ribonucleoside-diphosphate reductase subunit M2 B                                                                 |
| 2674                | UPI0001E8F504    | 6                          | 8                 | 23.3                     | 408    | 47080 | 7.5  | UPI0001E8F504 UniRef100 entry                                                                                     |
| 2674                | UPI0001C4CFFD    | 6                          | 8                 | 22.5                     | 423    | 48787 | 8    | ribonucleoside-diphosphate reductase subunit M2 B isoform 2                                                       |
| 2675                | Q8NG26           | 6                          | 9                 | 26.7                     | 300    | 33746 | 6.8  | Putative nudix hydrolyase                                                                                         |
| 2675                | Q9BW91-2         | 6                          | 9                 | 26.7                     | 300    | 33776 | 6.8  | Isoform 2 of ADP-ribose pyrophosphatase, mitochondrial                                                            |
| 2675                | Q9BW91           | 6                          | 9                 | 22.9                     | 350    | 39125 | 8.2  | ADP-ribose pyrophosphatase, mitochondrial                                                                         |
| 2675                | Q96KB3           | 6                          | 9                 | 22.9                     | 350    | 39042 | 8.1  | cDNA FLJ14389 fis, clone HEMBA1002876                                                                             |
| 2676                | Q96QR8           | 6                          | 15                | 26.6                     | 312    | 33241 | 5.4  | Transcriptional activator protein Pur-beta                                                                        |
| 2677                | A8K9K8           | 6                          | 7                 | 26.5                     | 313    | 35237 | 9.9  | cDNA FLJ75823, highly similar to sapiens dimethyladenosine transferase (HSA9761), mRNA                            |
| 2677                | Q9LUNQ2          | 6                          | 7                 | 26.5                     | 313    | 35236 | 10   | Probable dimethyladenosine transferase                                                                            |
| 2678                | Q96GD0           | 6                          | 8                 | 26.4                     | 296    | 31698 | 6.5  | Pyridoxal phosphate phosphatase                                                                                   |
| 2679                | Q9BQA1           | 6                          | 12                | 26.3                     | 342    | 36724 | 5.2  | Methylosome protein 50                                                                                            |
| 2680                | O14530           | 6                          | 9                 | 26.1                     | 226    | 26534 | 5.9  | Thioredoxin domain-containing protein 9                                                                           |
| 2681                | Q96PJ7           | 6                          | 13                | 30.8                     | 211    | 23758 | 8.7  | Ras-related GTP-binding protein RAB39                                                                             |
| 2681                | C9JBG0           | 6                          | 13                | 30.8                     | 211    | 23897 | 7.7  | Uncharacterized protein                                                                                           |
| 2681                | UPI0000E59ED8    | 6                          | 13                | 28.1                     | 231    | 25770 | 9    | UPI0000E59ED8 UniRef100 entry                                                                                     |
| 2681                | E7ES60           | 6                          | 13                | 27.8                     | 234    | 26144 | 9.2  | Uncharacterized protein                                                                                           |
| 2681                | Q9BZG1           | 6                          | 13                | 25.1                     | 259    | 29044 | 7.9  | Ras-related protein Rab-34                                                                                        |
| 2681                | Q6NXT3           | 6                          | 13                | 25.1                     | 259    | 29071 | 7.9  | RAB34 protein                                                                                                     |
| 2681                | A8MYQ9           | 6                          | 13                | 25                       | 260    | 29201 | 8.1  | Uncharacterized protein                                                                                           |
| 2681                | C9J3R5           | 6                          | 13                | 24.3                     | 268    | 29868 | 9.3  | Uncharacterized protein                                                                                           |
| 2681                | UPI0001929526    | 6                          | 13                | 20.6                     | 316    | 35185 | 8.6  | ras-related protein Rab-34 isoform 5                                                                              |
| 2682                | Q96JY6           | 6                          | 19                | 25                       | 352    | 37459 | 8.7  | PDZ and LIM domain protein 2                                                                                      |
| 2682                | UPI0000E5AE4E    | 6                          | 19                | 14.6                     | 602    | 62746 | 10.9 | PDZ and LIM domain protein 2 isoform 2                                                                            |
| 2683                | C9J8Z4           | 6                          | 13                | 24.6                     | 301    | 32285 | 6.8  | Uncharacterized protein                                                                                           |
| 2683                | Q969P0-3         | 6                          | 13                | 14.1                     | 526    | 55808 | 8.8  | Isoform 3 of Immunoglobulin superfamily member 8                                                                  |
| 2683                | Q969P0           | 6                          | 13                | 12.1                     | 613    | 65034 | 8    | Immunoglobulin superfamily member 8                                                                               |
| 2684                | O14562           | 6                          | 13                | 24.6                     | 309    | 33382 | 5.8  | Ubiquitin domain-containing protein UBFD1                                                                         |
| 2685                | Q5SR21           | 6                          | 10                | 32.1                     | 274    | 31862 | 8.6  | DNAation factor, 40kDa, beta polypeptide (Caspase-activated DNase)                                                |
| 2685                | O76075           | 6                          | 10                | 26                       | 338    | 39110 | 9    | DNA fragmentation factor subunit beta                                                                             |
| 2685                | B4DZS0           | 6                          | 10                | 24.3                     | 362    | 41956 | 8.8  | cDNA FLJ50316, highly similar to DNAation factor subunit beta (EC 3.-.-.)                                         |
| 2686                | Q9Y312           | 6                          | 7                 | 25                       | 384    | 43472 | 6    | Uncharacterized protein C20orf4                                                                                   |
| 2686                | A2A2Q9           | 6                          | 7                 | 24.1                     | 398    | 45034 | 7.5  | Chromosome 20 open reading frame 4                                                                                |
| 2687                | O43633           | 6                          | 8                 | 23.9                     | 222    | 25104 | 6    | Charged multivesicular body protein 2a                                                                            |
| 2688                | Q9H7Z7           | 6                          | 8                 | 23.9                     | 377    | 41943 | 9.2  | Prostaglandin E synthase 2                                                                                        |
| 2689                | Q9BWH2           | 6                          | 6                 | 23.8                     | 189    | 20676 | 9.7  | FUN14 domain-containing protein 2                                                                                 |
| 2690                | A8K6X2           | 6                          | 11                | 23.5                     | 357    | 39477 | 6.5  | hydrolase, mRNA                                                                                                   |
| 2690                | P54922           | 6                          | 11                | 23.5                     | 357    | 39507 | 6.5  | [Protein ADP-ribosylarginine] hydrolase                                                                           |
| 2691                | Q7L5D6-2         | 6                          | 13                | 28.1                     | 274    | 30523 | 5    | Isoform 2 of Golgi to ER traffic protein 4 log                                                                    |
| 2691                | Q7L5D6           | 6                          | 13                | 23.5                     | 327    | 36504 | 5.4  | Golgi to ER traffic protein 4 log                                                                                 |
| 2692                | Q9Y5B8           | 6                          | 7                 | 23.4                     | 376    | 42492 | 6.5  | Nucleoside diphosphate kinase 7                                                                                   |
| 2693                | B0FTY2           | 6                          | 17                | 23                       | 361    | 40779 | 5.2  | NudC-like protein                                                                                                 |
| 2693                | Q8IVD9           | 6                          | 17                | 23                       | 361    | 40822 | 5.3  | NudC domain-containing protein 3                                                                                  |
| 2694                | Q8IUF8           | 6                          | 6                 | 22.4                     | 465    | 52800 | 6.7  | MYC-induced nuclear antigen                                                                                       |
| 2694                | Q8IUF8-4         | 6                          | 6                 | 22.4                     | 464    | 52672 | 6.7  | Isoform 4 of MYC-induced nuclear antigen                                                                          |
| 2695                | B3KSH8           | 6                          | 7                 | 21.1                     | 399    | 43982 | 5.3  | cDNA FLJ36241 fis, clone THYMU2001622, highly similar to Inositol polyphosphate 1-phosphatase (EC 3.1.3.57)       |

Table S1. Proteins identified in the OVCAR-3 tumor supernatant by two or more unique peptides.

| Protein or Protein Group | Accession Number | Unique Peptide Count | Spectrum Count | Sequence Coverage (%) | Length | MolWt | pI  | Descriptive Name                                                                                                                                                                                            |
|--------------------------|------------------|----------------------|----------------|-----------------------|--------|-------|-----|-------------------------------------------------------------------------------------------------------------------------------------------------------------------------------------------------------------|
| 2695                     | P49441           | 6                    | 7              | 21.1                  | 399    | 43998 | 5.3 | Inositol polyphosphate 1-phosphatase                                                                                                                                                                        |
| 2695                     | B5BU62           | 6                    | 7              | 21.1                  | 399    | 43966 | 5.3 | Inositol polyphosphate-1-phosphatase                                                                                                                                                                        |
| 2696                     | Q9BWS9           | 6                    | 11             | 24.2                  | 393    | 44941 | 8.6 | Chitinase domain-containing protein 1                                                                                                                                                                       |
| 2696                     | B7Z705           | 6                    | 11             | 22.5                  | 423    | 48228 | 7.7 | cDNA FLJ56160                                                                                                                                                                                               |
| 2696                     | B4DN31           | 6                    | 11             | 20.9                  | 454    | 51051 | 8.9 | cDNA FLJ55809                                                                                                                                                                                               |
| 2696                     | UPI0001AE6B5B    | 6                    | 11             | 20.9                  | 454    | 51039 | 8.9 | Chitinase domain-containing protein 1 precursor (Stabilin-1-interacting chitinase-like protein) (SI-CLP).                                                                                                   |
| 2697                     | B3KUU4           | 6                    | 7              | 20.6                  | 446    | 49718 | 6.5 | NAD synthetase 1, isoform CRA_a                                                                                                                                                                             |
| 2697                     | Q6IA69           | 6                    | 7              | 13                    | 706    | 79285 | 6.4 | Glutamine-dependent NAD(+) synthetase                                                                                                                                                                       |
| 2698                     | Q53F51           | 6                    | 7              | 21                    | 357    | 41238 | 6.9 | FGF intracellular binding protein isoform b variant (Fragment)                                                                                                                                              |
| 2698                     | O46431           | 6                    | 7              | 21                    | 357    | 41210 | 6.8 | Acidic fibroblast growth factor intracellular-binding protein                                                                                                                                               |
| 2698                     | O43427           | 6                    | 7              | 20.6                  | 364    | 41878 | 6.5 | Acidic fibroblast growth factor intracellular-binding protein                                                                                                                                               |
| 2699                     | E1Y6P6           | 6                    | 12             | 27.8                  | 270    | 31111 | 5.3 | MHC class I antigen (Fragment)                                                                                                                                                                              |
| 2699                     | E3Q1I0           | 6                    | 12             | 21.6                  | 347    | 39054 | 5.9 | MHC class I antigen (Fragment)                                                                                                                                                                              |
| 2699                     | A4Q9R6           | 6                    | 12             | 20.5                  | 366    | 40676 | 6   | MHC class I antigen                                                                                                                                                                                         |
| 2699                     | A6H578           | 6                    | 12             | 20.5                  | 365    | 40561 | 6   | MHC class I antigen (Fragment)                                                                                                                                                                              |
| 2700                     | UPI0001E6F9FC    | 6                    | 32             | 40.7                  | 182    | 21608 | 7.6 | PREDICTED: 3-hydroxyacyl-CoA dehydratase 3-like isoform 1                                                                                                                                                   |
| 2700                     | Q9P035           | 6                    | 32             | 20.4                  | 362    | 43160 | 8.9 | 3-hydroxyacyl-CoA dehydratase 3                                                                                                                                                                             |
| 2701                     | P82970           | 6                    | 24             | 20.2                  | 282    | 31525 | 4.6 | High mobility group nucleosome-binding domain-containing protein 5                                                                                                                                          |
| 2702                     | B8ZZQ6           | 6                    | 46             | 24.3                  | 107    | 11759 | 3.8 | Uncharacterized protein                                                                                                                                                                                     |
| 2702                     | Q15202           | 6                    | 46             | 23.9                  | 109    | 11959 | 3.7 | Prothymosin alpha                                                                                                                                                                                           |
| 2702                     | Q8TBK9           | 6                    | 46             | 23.6                  | 110    | 12016 | 3.8 | Prothymosin, alpha                                                                                                                                                                                          |
| 2702                     | Q86YS2           | 6                    | 46             | 23.6                  | 110    | 12044 | 3.8 | Prothymosin alpha protein                                                                                                                                                                                   |
| 2702                     | Q5VYG3           | 6                    | 46             | 23.6                  | 110    | 12055 | 3.8 | Novel protein similar to prothymosin, alpha (PTMA)                                                                                                                                                          |
| 2702                     | Q53S24           | 6                    | 46             | 23.6                  | 110    | 12074 | 3.8 | Prothymosin, alpha                                                                                                                                                                                          |
| 2702                     | Q15204           | 6                    | 46             | 23.6                  | 110    | 12047 | 3.7 | Prothymosin alpha                                                                                                                                                                                           |
| 2702                     | Q15200           | 6                    | 46             | 23.6                  | 110    | 12085 | 3.8 | Prothymosin alpha                                                                                                                                                                                           |
| 2702                     | P06454           | 6                    | 46             | 23.4                  | 111    | 12203 | 3.8 | Prothymosin alpha                                                                                                                                                                                           |
| 2702                     | B8ZZA1           | 6                    | 46             | 19.8                  | 131    | 14252 | 3.8 | Uncharacterized protein                                                                                                                                                                                     |
| 2702                     | B8ZZW7           | 6                    | 46             | 19.1                  | 136    | 14719 | 4.1 | Uncharacterized protein                                                                                                                                                                                     |
| 2702                     | UPI00018819F6    | 6                    | 46             | 17.6                  | 148    | 15860 | 4.2 | UPI00018819F6 UniRef100 entry                                                                                                                                                                               |
| 2703                     | B2R6S4           | 6                    | 9              | 19.1                  | 377    | 42907 | 6.5 | cDNA, FLJ93089, highly similar to sapiens NCK adaptor protein 1 (NCK1), mRNA                                                                                                                                |
| 2703                     | P16333           | 6                    | 9              | 19.1                  | 377    | 42864 | 6.5 | Cytoplasmic protein NCK1                                                                                                                                                                                    |
| 2704                     | Q9UIC8           | 6                    | 13             | 19.2                  | 334    | 38379 | 6   | Leucine carboxyl methyltransferase 1                                                                                                                                                                        |
| 2704                     | A8MQ43           | 6                    | 13             | 18.9                  | 338    | 38834 | 6.5 | Uncharacterized protein                                                                                                                                                                                     |
| 2704                     | Q9UIC8-2         | 6                    | 13             | 17.9                  | 357    | 41106 | 7   | Isoform 2 of Leucine carboxyl methyltransferase 1                                                                                                                                                           |
| 2705                     | Q86UE4           | 6                    | 8              | 18.9                  | 582    | 63837 | 9.3 | Protein LYRIC                                                                                                                                                                                               |
| 2706                     | Q9Y6G9           | 6                    | 13             | 18.9                  | 523    | 56579 | 6.4 | Cytoplasmic dynein 1 light intermediate chain 1                                                                                                                                                             |
| 2707                     | C9JH30           | 6                    | 41             | 18.5                  | 433    | 47910 | 4.8 | Uncharacterized protein                                                                                                                                                                                     |
| 2707                     | UPI00001AECF3    | 6                    | 41             | 18.3                  | 437    | 48267 | 5   | UPI00001AECF3 UniRef100 entry                                                                                                                                                                               |
| 2708                     | Q8WZA9           | 6                    | 7              | 18.3                  | 623    | 62717 | 4.9 | Immunity-related GTPase family Q protein                                                                                                                                                                    |
| 2709                     | P53602           | 6                    | 7              | 18.2                  | 400    | 43405 | 7.2 | Diphosphomevalonate decarboxylase                                                                                                                                                                           |
| 2710                     | Q6EMK4           | 6                    | 10             | 18                    | 673    | 71713 | 7.4 | Vasorin                                                                                                                                                                                                     |
| 2711                     | B4E324           | 6                    | 11             | 17.7                  | 480    | 54270 | 7   | cDNA, FLJ60397, highly similar to Lysosomal protective protein (EC 3.4.16.5)                                                                                                                                |
| 2711                     | UPI0001BC0385    | 6                    | 11             | 17.7                  | 481    | 54256 | 7   | lysosomal protective protein isoform c precursor                                                                                                                                                            |
| 2711                     | P10619           | 6                    | 11             | 17.7                  | 480    | 54466 | 6.6 | Lysosomal protective protein                                                                                                                                                                                |
| 2711                     | Q59EV6           | 6                    | 11             | 17.1                  | 497    | 56120 | 6.6 | Carrier family 6, member 8 variant (Fragment)                                                                                                                                                               |
| 2712                     | D6RJA0           | 6                    | 8              | 17.7                  | 362    | 40127 | 4.8 | Uncharacterized protein                                                                                                                                                                                     |
| 2712                     | Q8WTS6           | 6                    | 8              | 17.5                  | 366    | 40721 | 4.6 | Histone-lysine N-methyltransferase SETD7                                                                                                                                                                    |
| 2713                     | Q9BZE9           | 6                    | 14             | 17.7                  | 553    | 60183 | 6.6 | Tether containing UBX domain for GLUT4                                                                                                                                                                      |
| 2713                     | Q9BZE9-2         | 6                    | 14             | 15.1                  | 647    | 69990 | 8.1 | Isoform 2 of Tether containing UBX domain for GLUT4                                                                                                                                                         |
| 2714                     | Q9NY27-3         | 6                    | 18             | 20.5                  | 361    | 40249 | 4.4 | Isoform 3 of Serine/threonine-protein phosphatase 4 regulatory subunit 2                                                                                                                                    |
| 2714                     | Q9NY27           | 6                    | 18             | 17.7                  | 417    | 46898 | 4.5 | Serine/threonine-protein phosphatase 4 regulatory subunit 2                                                                                                                                                 |
| 2715                     | B2RDH6           | 6                    | 7              | 17.6                  | 596    | 67630 | 7.1 | cDNA, FLJ96613, highly similar to sapiens vacuolar protein sorting 33A (yeast) (VPS33A), mRNA                                                                                                               |
| 2715                     | Q96AX1           | 6                    | 7              | 17.6                  | 596    | 67611 | 7   | Vacuolar protein sorting-associated protein 33A                                                                                                                                                             |
| 2716                     | UPI000187F6B4    | 6                    | 9              | 17.7                  | 509    | 57033 | 9.5 | H/ACA ribonucleoprotein complex subunit 4 isoform 2                                                                                                                                                         |
| 2716                     | UPI00015E0408    | 6                    | 9              | 17.6                  | 512    | 57487 | 9.5 | H/ACA ribonucleoprotein complex subunit 4 (EC 5.4.99.-) (Dyskerin) (Nucleolar protein family A member 4) (snoRNP protein DKC1) (Nopp140-associated protein of 57 kDa) (Nucleolar protein NAP57) (CBF5 log). |
| 2716                     | A8MUT5           | 6                    | 9              | 17.5                  | 514    | 57645 | 9.5 | Uncharacterized protein                                                                                                                                                                                     |
| 2716                     | Q60832           | 6                    | 9              | 17.5                  | 514    | 57674 | 9.4 | H/ACA ribonucleoprotein complex subunit 4                                                                                                                                                                   |
| 2717                     | Q14166           | 6                    | 6              | 17.5                  | 644    | 74404 | 5.5 | Tubulin-tyrosine ligase-like protein 12                                                                                                                                                                     |
| 2718                     | E5RHC5           | 6                    | 26             | 33.5                  | 209    | 23692 | 6.4 | Uncharacterized protein                                                                                                                                                                                     |
| 2718                     | Q8N6T3-3         | 6                    | 26             | 17.7                  | 396    | 43776 | 8.5 | Isoform 3 of ADP-ribosylation factor GTPase-activating protein 1                                                                                                                                            |
| 2718                     | B7ZBI2           | 6                    | 26             | 17.4                  | 403    | 44467 | 8.6 | ADP-ribosylation factor GTPase-activating protein 1                                                                                                                                                         |
| 2718                     | Q8N6T3           | 6                    | 26             | 17.2                  | 406    | 44668 | 5.7 | ADP-ribosylation factor GTPase-activating protein 1                                                                                                                                                         |
| 2718                     | Q53F62           | 6                    | 26             | 17.2                  | 406    | 44669 | 5.4 | ADP-ribosylation factor GTPase-activating protein 1 isoform a variant (Fragment)                                                                                                                            |
| 2718                     | Q8N6T3-2         | 6                    | 26             | 16.9                  | 414    | 45676 | 5.8 | Isoform 2 of ADP-ribosylation factor GTPase-activating protein 1                                                                                                                                            |
| 2719                     | Q9BRP4           | 6                    | 9              | 17.3                  | 392    | 42190 | 6.3 | Proteasomal ATPase-associated factor 1                                                                                                                                                                      |
| 2720                     | B2R8X4           | 6                    | 7              | 17.2                  | 454    | 51267 | 5   | cDNA, FLJ94105, highly similar to sapiens GA binding protein transcription factor, alpha subunit 60kDa (GABPA), mRNA                                                                                        |
| 2720                     | Q53FW7           | 6                    | 7              | 17.2                  | 454    | 51281 | 5   | GA binding protein transcription factor, alpha subunit (60kD) variant (Fragment)                                                                                                                            |
| 2720                     | Q06546           | 6                    | 7              | 17.2                  | 454    | 51295 | 5   | GA-binding protein alpha chain                                                                                                                                                                              |
| 2721                     | B3KP96           | 6                    | 9              | 22.4                  | 434    | 50030 | 6.7 | cDNA FLJ31464 fis, clone NT2NE2001337, highly similar to Tripartite motif-containing protein 16                                                                                                             |
| 2721                     | B3KMJ2           | 6                    | 9              | 17.2                  | 564    | 63971 | 5.4 | cDNA FLJ11173 fis, clone PLACE1007346, highly similar to Tripartite motif-containing protein 16                                                                                                             |
| 2721                     | Q95361           | 6                    | 9              | 17.2                  | 564    | 63955 | 5.5 | Tripartite motif-containing protein 16                                                                                                                                                                      |
| 2722                     | Q9BY77           | 6                    | 11             | 17.8                  | 421    | 46089 | 10  | Polymerase delta-interacting protein 3                                                                                                                                                                      |
| 2722                     | B4E0L0           | 6                    | 11             | 17.1                  | 438    | 48102 | 9.9 | cDNA FLJ54030, highly similar to Polymerase delta-interacting protein 3                                                                                                                                     |
| 2722                     | UPI0001AE632D    | 6                    | 11             | 17.1                  | 438    | 48104 | 9.9 | UPI0001AE632D UniRef100 entry                                                                                                                                                                               |
| 2723                     | A8K243           | 6                    | 9              | 16.8                  | 387    | 44746 | 6.7 | cDNA FLJ78172, highly similar to sapiens butyrobetaine (gamma), 2-oxoglutarate dioxygenase (gamma-butyrobetaine hydroxylase) 1 (BBOX1), mRNA                                                                |
| 2723                     | Q75936           | 6                    | 9              | 16.8                  | 387    | 44715 | 6.7 | Gamma-butyrobetaine dioxygenase                                                                                                                                                                             |
| 2724                     | Q9H1P3-2         | 6                    | 8              | 16.9                  | 468    | 53971 | 6.6 | Isoform 2 of Oxysterol-binding protein-related protein 2                                                                                                                                                    |
| 2724                     | B2RDK3           | 6                    | 8              | 16.5                  | 480    | 55171 | 6.4 | Oxysterol-binding protein                                                                                                                                                                                   |
| 2724                     | Q9H1P3           | 6                    | 8              | 16.5                  | 480    | 55201 | 6.4 | Oxysterol-binding protein-related protein 2                                                                                                                                                                 |
| 2725                     | Q9H3P2           | 6                    | 29             | 16.1                  | 528    | 57277 | 9   | Negative elongation factor A                                                                                                                                                                                |
| 2725                     | Q53GS8           | 6                    | 29             | 16.1                  | 528    | 57349 | 8.9 | Wolf-Hirschhorn syndrome candidate 2 protein variant (Fragment)                                                                                                                                             |
| 2725                     | B3KM78           | 6                    | 29             | 15.8                  | 539    | 58528 | 9.2 | cDNA FLJ10442 fis, clone NT2RFP1000738, highly similar to Negative elongation factor A                                                                                                                      |
| 2726                     | P38432           | 6                    | 13             | 15.5                  | 576    | 62608 | 9.1 | Coilin                                                                                                                                                                                                      |

Table S1. Proteins identified in the OVCAR-3 tumor supernatant by two or more unique peptides.

| Protein or Protein Group | Accession Number | Unique Peptide Count | Spectrum Count | Sequence Coverage (%) | Length | MolWt  | pI  | Descriptive Name                                                                                                                        |
|--------------------------|------------------|----------------------|----------------|-----------------------|--------|--------|-----|-----------------------------------------------------------------------------------------------------------------------------------------|
| 2727                     | B4DHL7           | 6                    | 14             | 15.4                  | 773    | 85155  | 5.5 | cDNA FLJ59515                                                                                                                           |
| 2727                     | Q6P996           | 6                    | 14             | 15.1                  | 788    | 86707  | 5.4 | Pyridoxal-dependent decarboxylase domain-containing protein 1 Isoform 3 of Serine/threonine-protein phosphatase 4 regulatory subunit 3B |
| 2728                     | Q5MIZ7-3         | 6                    | 13             | 15.1                  | 764    | 87377  | 4.8 | Phospholipase D3                                                                                                                        |
| 2729                     | Q8IV08           | 6                    | 29             | 14.7                  | 490    | 54705  | 6.5 | Uncharacterized protein                                                                                                                 |
| 2730                     | A8MWK3           | 6                    | 7              | 14.5                  | 875    | 97040  | 4.8 | Cadherin-2                                                                                                                              |
| 2730                     | P19022           | 6                    | 7              | 14                    | 906    | 99809  | 4.8 | cDNA FLJ77770, highly similar to sapiens nucleobindin 1 (NUCB1), mRNA                                                                   |
| 2731                     | A8K7Q1           | 6                    | 6              | 14.3                  | 461    | 53883  | 5.2 | Nucleobindin 1 variant (Fragment)                                                                                                       |
| 2731                     | Q53GX6           | 6                    | 6              | 14.3                  | 461    | 53907  | 5.2 | Nucleobindin-1                                                                                                                          |
| 2731                     | Q02818           | 6                    | 6              | 14.3                  | 461    | 53879  | 5.2 | Isoform 2 of Acyl-CoA-binding domain-containing protein 5                                                                               |
| 2732                     | Q5T8D3-2         | 6                    | 11             | 15.1                  | 490    | 54786  | 5.2 | cDNA FLJ55488, highly similar to sapiens acyl-Coenzyme A binding domain containing 5 (ACBD5), mRNA                                      |
| 2732                     | B7Z2R7           | 6                    | 11             | 14.1                  | 523    | 58792  | 5.3 | Isoform 3 of Acyl-CoA-binding domain-containing protein 5                                                                               |
| 2732                     | Q5T8D3-3         | 6                    | 11             | 14.1                  | 525    | 58978  | 5.3 | Isoform 2 of Synembryon-A                                                                                                               |
| 2733                     | Q9NPQ8-2         | 6                    | 11             | 14.3                  | 525    | 58943  | 6.6 | Isoform 4 of Synembryon-A                                                                                                               |
| 2733                     | Q9NPQ8-4         | 6                    | 11             | 14.2                  | 530    | 59612  | 5.3 | Synembryon-A                                                                                                                            |
| 2733                     | Q9NPQ8           | 6                    | 11             | 14.1                  | 531    | 59710  | 5.3 | Isoform 3 of Synembryon-A                                                                                                               |
| 2733                     | Q9NPQ8-3         | 6                    | 11             | 14                    | 537    | 60372  | 5.3 | Uncharacterized protein                                                                                                                 |
| 2734                     | E9PECO           | 6                    | 20             | 14                    | 386    | 40091  | 5.1 | Proteasomal ubiquitin receptor ADRM1                                                                                                    |
| 2734                     | Q16186           | 6                    | 20             | 13.3                  | 407    | 42153  | 5.1 | Calnexin                                                                                                                                |
| 2735                     | P27824           | 6                    | 15             | 13.9                  | 592    | 67568  | 4.6 | La-related protein 7                                                                                                                    |
| 2736                     | Q4G0J3           | 6                    | 7              | 13.9                  | 582    | 66899  | 9.6 | Protein Niban                                                                                                                           |
| 2737                     | Q9BZQ8           | 6                    | 6              | 13.9                  | 928    | 103135 | 4.8 | Uncharacterized protein                                                                                                                 |
| 2738                     | D6RFG1           | 6                    | 11             | 36                    | 200    | 23310  | 5.8 | OCLN                                                                                                                                    |
| 2738                     | D2DU65           | 6                    | 11             | 36                    | 200    | 23324  | 6   | PREDICTED: occludin-like                                                                                                                |
| 2738                     | UPI0001E6F9BC    | 6                    | 11             | 26.6                  | 271    | 31588  | 5.5 | OCLN                                                                                                                                    |
| 2738                     | D2DU64           | 6                    | 11             | 26.6                  | 271    | 31602  | 5.7 | PREDICTED: occludin-like                                                                                                                |
| 2738                     | UPI0000D60EA9    | 6                    | 11             | 15.4                  | 468    | 52692  | 5.9 | Tight junction protein occludin TM4 minus                                                                                               |
| 2738                     | Q5U1V4           | 6                    | 11             | 15.4                  | 468    | 52706  | 6.1 | cDNA FLJ77961, highly similar to sapiens occludin (OCLN), mRNA                                                                          |
| 2738                     | A8K3T2           | 6                    | 11             | 13.8                  | 522    | 59136  | 6.1 | PREDICTED: occludin-like                                                                                                                |
| 2738                     | UPI000013CA1F    | 6                    | 11             | 13.8                  | 522    | 59130  | 5.9 | Occludin                                                                                                                                |
| 2738                     | Q16625           | 6                    | 11             | 13.8                  | 522    | 59144  | 6.1 | Geranylgeranyl transferase type-1 subunit beta                                                                                          |
| 2739                     | P53609           | 6                    | 7              | 13.8                  | 377    | 42368  | 6.8 | 6-phosphofructokinase, muscle type                                                                                                      |
| 2740                     | P08237           | 6                    | 7              | 13.7                  | 780    | 85182  | 8   | cDNA FLJ44241 fis, clone THYMU3008436, highly similar to 6-phosphofructokinase, muscle type (EC 2.7.1.11)                               |
| 2740                     | Q6ZTT1           | 6                    | 7              | 12.6                  | 851    | 93220  | 8   | PACSIN2 protein                                                                                                                         |
| 2741                     | Q6FIA3           | 6                    | 9              | 13.7                  | 445    | 51353  | 5.4 | Protein kinase C and casein kinase substrate in neurons protein 2                                                                       |
| 2741                     | Q9UNF0           | 6                    | 9              | 12.6                  | 486    | 55739  | 5.2 | HEAT repeat-containing protein 3                                                                                                        |
| 2742                     | Q7Z4Q2           | 6                    | 17             | 13.5                  | 680    | 74583  | 5.1 | cDNA FLJ75689, highly similar to sapiens poliovirus receptor-related 2 (herpesvirus entry mediator B) (PVR2), mRNA                      |
| 2743                     | A8K5L5           | 6                    | 7              | 13.2                  | 479    | 51375  | 5.1 | Isoform Alpha of Poliovirus receptor-related protein 2                                                                                  |
| 2743                     | Q92692-2         | 6                    | 7              | 13.2                  | 479    | 51359  | 5.1 | Poliovirus receptor-related protein 2                                                                                                   |
| 2743                     | Q92692           | 6                    | 7              | 11.7                  | 538    | 57742  | 4.8 | UPI0000EE22F1 UniRef100 entry                                                                                                           |
| 2744                     | UPI0000EE22F1    | 6                    | 8              | 13.4                  | 647    | 73477  | 5.6 | Cleavage and polyadenylation specific factor 3, 73kDa variant (Fragment)                                                                |
| 2744                     | Q53F02           | 6                    | 8              | 12.7                  | 684    | 77470  | 5.7 | Cleavage and polyadenylation specificity factor subunit 3                                                                               |
| 2744                     | Q9UKF6           | 6                    | 8              | 12.7                  | 684    | 77486  | 5.6 | Serine/threonine-protein kinase OSR1                                                                                                    |
| 2745                     | Q95747           | 6                    | 16             | 12.5                  | 527    | 58022  | 6.4 | 52 kDa repressor of the inhibitor of the protein kinase                                                                                 |
| 2746                     | O43422           | 6                    | 11             | 12.4                  | 761    | 87704  | 5.9 | Protein-kinase, interferon-inducible double stranded RNA dependent inhibitor, repressor of (P58 repressor)                              |
| 2746                     | Q2YDB3           | 6                    | 11             | 12.4                  | 761    | 87717  | 6   | RNA-binding protein 14                                                                                                                  |
| 2747                     | Q96PK6           | 6                    | 9              | 12                    | 669    | 69492  | 9.7 | Uncharacterized protein C19orf21                                                                                                        |
| 2748                     | Q8IVT2           | 6                    | 22             | 11.2                  | 679    | 75357  | 6.8 | Isoform 2 of TBC1 domain family member 15                                                                                               |
| 2749                     | Q8TC07-2         | 6                    | 7              | 11.1                  | 674    | 77395  | 5.4 | cDNA FLJ58591, highly similar to TBC1 domain family member 15                                                                           |
| 2749                     | B4DMT9           | 6                    | 7              | 11                    | 682    | 78529  | 5.4 | Uncharacterized protein                                                                                                                 |
| 2749                     | E9PH93           | 6                    | 7              | 11                    | 682    | 78573  | 5.3 | TBC1 domain family member 15                                                                                                            |
| 2749                     | Q8TC07           | 6                    | 7              | 10.9                  | 691    | 79491  | 5.7 | SET domain containing 3                                                                                                                 |
| 2750                     | A5PLP0           | 6                    | 10             | 10.6                  | 594    | 67256  | 6.2 | SET domain-containing protein 3                                                                                                         |
| 2750                     | Q86TU7           | 6                    | 10             | 10.6                  | 594    | 67257  | 6   | Uncharacterized protein                                                                                                                 |
| 2751                     | A8MQC0           | 6                    | 7              | 10.2                  | 630    | 73041  | 8   | Coiled-coil domain-containing protein 93                                                                                                |
| 2751                     | Q567U6           | 6                    | 7              | 10.1                  | 631    | 73198  | 8.2 | Epithelial protein lost in neoplasm beta variant (Fragment)                                                                             |
| 2752                     | Q53GG0           | 6                    | 15             | 9.6                   | 759    | 85254  | 6.8 | LIM domain and actin-binding protein 1                                                                                                  |
| 2752                     | Q9UHB6           | 6                    | 15             | 9.6                   | 759    | 85226  | 6.8 | Epithelial protein lost in neoplasm beta variant (Fragment)                                                                             |
| 2752                     | Q59FE8           | 6                    | 15             | 9.5                   | 769    | 86107  | 6.8 | Pantothenate kinase 4                                                                                                                   |
| 2753                     | Q9NVE7           | 6                    | 6              | 9.6                   | 773    | 85991  | 6.3 | cDNA FLJ56439, highly similar to Pantothenate kinase 4 (EC 2.7.1.33)                                                                    |
| 2753                     | B4DHW9           | 6                    | 6              | 9.5                   | 781    | 86954  | 6.4 | cDNA FLJ51908, highly similar to Dolichyl-diphosphooligosaccharide--protein glycosyltransferase 67 kDa subunit (EC 2.4.1.119)           |
| 2754                     | B4DNJ5           | 6                    | 10             | 14                    | 378    | 43369  | 6.5 | cDNA FLJ50809, highly similar to Dolichyl-diphosphooligosaccharide--protein glycosyltransferase 67 kDa subunit (EC 2.4.1.119)           |
| 2754                     | B7Z4L4           | 6                    | 10             | 12.2                  | 435    | 49921  | 6.6 | cDNA FLJ51740, highly similar to Dolichyl-diphosphooligosaccharide--protein glycosyltransferase 67 kDa subunit (EC 2.4.1.119)           |
| 2754                     | B4DL99           | 6                    | 10             | 9.1                   | 581    | 65838  | 6.2 | RPN1 protein                                                                                                                            |
| 2754                     | Q6IBR0           | 6                    | 10             | 8.7                   | 607    | 68607  | 6.4 | Ribophorin I variant (Fragment)                                                                                                         |
| 2754                     | Q53EP4           | 6                    | 10             | 8.7                   | 607    | 68580  | 6.4 | Dolichyl-diphosphooligosaccharide--protein glycosyltransferase subunit 1                                                                |
| 2754                     | P04843           | 6                    | 10             | 8.7                   | 607    | 68569  | 6.4 | KIAA0406 protein (Fragment)                                                                                                             |
| 2755                     | Q3B768           | 6                    | 10             | 12.2                  | 803    | 90317  | 6.4 | TEL2-interacting protein 1 log                                                                                                          |
| 2755                     | O43156           | 6                    | 10             | 9                     | 1089   | 122069 | 6   | Isoform 2 of RalBP1-associated Eps domain-containing protein 1                                                                          |
| 2756                     | Q96D71-2         | 6                    | 17             | 9.4                   | 705    | 76838  | 5.8 | cDNA, FLJ93390, highly similar to sapiens RALBP1 associated Eps domain containing 1 (REPS1), mRNA                                       |
| 2756                     | B2R7D3           | 6                    | 17             | 8.9                   | 744    | 80848  | 5.8 | UPI0001F785F6 UniRef100 entry                                                                                                           |
| 2756                     | UPI0001F785F6    | 6                    | 17             | 8.8                   | 754    | 81949  | 6   | ralBP1-associated Eps domain-containing protein 1 isoform b                                                                             |
| 2756                     | UPI0001765CA1    | 6                    | 17             | 8.6                   | 769    | 83650  | 5.9 | Isoform 3 of RalBP1-associated Eps domain-containing protein 1                                                                          |
| 2756                     | Q96D71-3         | 6                    | 17             | 8.3                   | 795    | 86591  | 5.7 | RalBP1-associated Eps domain-containing protein 1                                                                                       |
| 2756                     | Q96D71           | 6                    | 17             | 8.3                   | 796    | 86662  | 5.7 | Topoisomerase (DNA) I                                                                                                                   |
| 2757                     | B9EG90           | 6                    | 15             | 8.9                   | 765    | 90700  | 9.3 | DNA topoisomerase 1                                                                                                                     |
| 2757                     | P11387           | 6                    | 15             | 8.9                   | 765    | 90726  | 9.3 | Zinc finger CCCH-type antiviral protein 1                                                                                               |
| 2758                     | Q7Z2W4           | 6                    | 10             | 10.1                  | 902    | 101431 | 8.4 | Uncharacterized protein                                                                                                                 |
| 2758                     | C9J6P4           | 6                    | 10             | 8.9                   | 1024   | 114085 | 8.6 | Uncharacterized protein                                                                                                                 |
| 2759                     | D6RHJ4           | 6                    | 19             | 8.3                   | 815    | 82617  | 7.4 | Isoform 8 of Treacle protein                                                                                                            |
| 2759                     | Q13428-8         | 6                    | 19             | 4.8                   | 1412   | 144413 | 9   | Isoform 2 of Treacle protein                                                                                                            |
| 2759                     | Q13428-2         | 6                    | 19             | 4.8                   | 1411   | 144314 | 9   | Isoform 7 of Treacle protein                                                                                                            |
| 2759                     | Q13428-7         | 6                    | 19             | 4.7                   | 1451   | 148352 | 8.9 |                                                                                                                                         |

Table S1. Proteins identified in the OVCAR-3 tumor supernatant by two or more unique peptides.

| Protein or Group | Accession Number | Unique Peptide Count | Spectrum Count | Sequence Coverage (%) | Length | MolWt  | pI   | Descriptive Name                                                                                                                                |
|------------------|------------------|----------------------|----------------|-----------------------|--------|--------|------|-------------------------------------------------------------------------------------------------------------------------------------------------|
| 2759             | Q13428-6         | 6                    | 19             | 4.7                   | 1450   | 148253 | 8.9  | Isoform 6 of Treacle protein                                                                                                                    |
| 2759             | Q13428-3         | 6                    | 19             | 4.6                   | 1489   | 152205 | 9    | Isoform 3 of Treacle protein                                                                                                                    |
| 2759             | Q13428           | 6                    | 19             | 4.6                   | 1488   | 152105 | 9    | Treacle protein                                                                                                                                 |
| 2759             | E7ETY2           | 6                    | 19             | 4.6                   | 1488   | 152303 | 8.9  | Uncharacterized protein                                                                                                                         |
| 2759             | Q13428-4         | 6                    | 19             | 4.5                   | 1524   | 155928 | 8.9  | Isoform 4 of Treacle protein                                                                                                                    |
| 2759             | E9PHK9           | 6                    | 19             | 4.5                   | 1525   | 156057 | 9    | Uncharacterized protein                                                                                                                         |
| 2760             | B7Z670           | 6                    | 8              | 8.2                   | 1153   | 127589 | 6.2  | cDNA FLJ61703, highly similar to Neuronal cell adhesion molecule (Fragment)                                                                     |
| 2760             | Q92823-3         | 6                    | 8              | 8.1                   | 1180   | 130668 | 6    | Isoform 3 of Neuronal cell adhesion molecule                                                                                                    |
| 2760             | Q14CA1           | 6                    | 8              | 8.1                   | 1180   | 130642 | 6    | NRCA protein                                                                                                                                    |
| 2760             | Q92823-4         | 6                    | 8              | 8                     | 1183   | 131046 | 5.8  | Isoform 4 of Neuronal cell adhesion molecule                                                                                                    |
| 2760             | Q14BM2           | 6                    | 8              | 8                     | 1192   | 131718 | 6    | NRCA protein                                                                                                                                    |
| 2760             | E9PDA4           | 6                    | 8              | 8                     | 1192   | 131744 | 6    | Uncharacterized protein                                                                                                                         |
| 2760             | UPI0001DD3803    | 6                    | 8              | 7.8                   | 1211   | 133813 | 5.8  | neuronal cell adhesion molecule isoform D precursor                                                                                             |
| 2760             | Q92823-2         | 6                    | 8              | 7.7                   | 1236   | 136614 | 6    | Isoform 2 of Neuronal cell adhesion molecule                                                                                                    |
| 2760             | Q92823-5         | 6                    | 8              | 7.3                   | 1308   | 144375 | 5.7  | Isoform 5 of Neuronal cell adhesion molecule                                                                                                    |
| 2760             | Q92823           | 6                    | 8              | 7.3                   | 1304   | 143889 | 5.7  | Neuronal cell adhesion molecule                                                                                                                 |
| 2761             | Q27J81-2         | 6                    | 32             | 8.3                   | 1240   | 134617 | 5.5  | Isoform 2 of Inverted formin-2                                                                                                                  |
| 2761             | E7EVT0           | 6                    | 32             | 8.2                   | 1250   | 135695 | 5.4  | Uncharacterized protein                                                                                                                         |
| 2761             | Q27J81           | 6                    | 32             | 8.2                   | 1249   | 135624 | 5.4  | Inverted formin-2                                                                                                                               |
| 2762             | Q8IYB7           | 6                    | 11             | 7.6                   | 885    | 99279  | 6.1  | DIS3-like exonuclease 2                                                                                                                         |
| 2763             | Q95479           | 6                    | 9              | 7.5                   | 791    | 88893  | 7.3  | GDH6PGL endoplasmic bifunctional protein                                                                                                        |
| 2764             | UPI00003665C9    | 6                    | 7              | 7.5                   | 1163   | 124919 | 7.3  | protein turtle log A isoform b                                                                                                                  |
| 2764             | Q9P2J2           | 6                    | 7              | 7.4                   | 1179   | 126580 | 7.1  | Protein turtle log A                                                                                                                            |
| 2765             | Q5T8P6-3         | 6                    | 7              | 7.2                   | 980    | 110666 | 9.1  | Isoform 3 of RNA-binding protein 26                                                                                                             |
| 2765             | Q5T8P6-2         | 6                    | 7              | 7.2                   | 983    | 111024 | 9.1  | Isoform 2 of RNA-binding protein 26                                                                                                             |
| 2765             | Q5T8P6           | 6                    | 7              | 7.1                   | 1007   | 113597 | 9.2  | RNA-binding protein 26                                                                                                                          |
| 2766             | B4DETO           | 6                    | 21             | 6.9                   | 1220   | 139681 | 6.6  | cDNA FLJ55900, highly similar to Pre-mRNA-splicing factor ATP-dependent RNA helicase PRP16 (EC 3.6.1.-)                                         |
| 2766             | A8K6G9           | 6                    | 21             | 6.8                   | 1227   | 140474 | 6.5  | cDNA FLJ76871, highly similar to sapiens DEAH (Asp-Glu-Ala-His) box polypeptide 38 (DHX38), mRNA                                                |
| 2766             | Q92620           | 6                    | 21             | 6.8                   | 1227   | 140502 | 6.5  | Pre-mRNA-splicing factor ATP-dependent RNA helicase PRP16                                                                                       |
| 2767             | Q9P260           | 6                    | 11             | 6.2                   | 1216   | 134630 | 5.4  | LisH domain and HEAT repeat-containing protein KIAA1468                                                                                         |
| 2767             | Q9P260-2         | 6                    | 11             | 6.1                   | 1250   | 138744 | 5.5  | Isoform 2 of LisH domain and HEAT repeat-containing protein KIAA1468                                                                            |
| 2768             | Q86SE4           | 6                    | 7              | 12.2                  | 534    | 59803  | 6.4  | L1 cell adhesion molecule (Fragment)                                                                                                            |
| 2768             | A8K139           | 6                    | 7              | 5.2                   | 1257   | 140033 | 6.2  | cDNA FLJ76744, highly similar to sapiens L1 cell adhesion molecule (L1CAM), transcript variant 1, mRNA                                          |
| 2768             | UPI00001AEDC0    | 6                    | 7              | 5.2                   | 1248   | 138907 | 6.2  | neuronal cell adhesion molecule L1 isoform 3 precursor                                                                                          |
| 2768             | P32004-2         | 6                    | 7              | 5.2                   | 1253   | 139517 | 6.2  | Isoform 2 of Neuronal cell adhesion molecule L1                                                                                                 |
| 2768             | P32004           | 6                    | 7              | 5.2                   | 1257   | 140003 | 6.2  | Neuronal cell adhesion molecule L1                                                                                                              |
| 2769             | B7ZLC9           | 6                    | 7              | 5.2                   | 1507   | 168431 | 6.6  | GEMIN5 protein                                                                                                                                  |
| 2769             | Q8TEQ6           | 6                    | 7              | 5.2                   | 1508   | 168589 | 6.6  | Gem-associated protein 5                                                                                                                        |
| 2770             | Q8N3D4           | 6                    | 9              | 5.2                   | 1523   | 161854 | 4.8  | EH domain-binding protein 1-like protein 1                                                                                                      |
| 2771             | Q6ZS30           | 6                    | 7              | 3.7                   | 2694   | 307236 | 6.4  | Neurobeachin-like protein 1                                                                                                                     |
| 2772             | P49750-4         | 6                    | 10             | 3.4                   | 2146   | 241643 | 6.6  | Isoform 4 of YLP motif-containing protein 1                                                                                                     |
| 2773             | P46013-2         | 6                    | 14             | 3.1                   | 2896   | 319444 | 9.5  | Isoform Short of Antigen KI-67                                                                                                                  |
| 2773             | P46013           | 6                    | 14             | 2.7                   | 3256   | 358695 | 9.4  | Antigen KI-67                                                                                                                                   |
| 2774             | B2RWP4           | 6                    | 15             | 2.5                   | 2826   | 296740 | 4.8  | TACC2 protein                                                                                                                                   |
| 2774             | Q95359-3         | 6                    | 15             | 2.5                   | 2871   | 301056 | 4.8  | Isoform 3 of Transforming acidic coiled-coil-containing protein 2                                                                               |
| 2774             | E9PBC6           | 6                    | 15             | 2.5                   | 2875   | 302507 | 4.8  | Uncharacterized protein                                                                                                                         |
| 2774             | E7EMZ9           | 6                    | 15             | 2.5                   | 2826   | 296740 | 4.8  | Uncharacterized protein                                                                                                                         |
| 2774             | B7ZMJ9           | 6                    | 15             | 2.5                   | 2875   | 302586 | 4.8  | TACC2 protein                                                                                                                                   |
| 2774             | Q95359           | 6                    | 15             | 2.4                   | 2948   | 309426 | 4.8  | Transforming acidic coiled-coil-containing protein 2                                                                                            |
| 2775             | Q94915           | 6                    | 10             | 2.5                   | 3013   | 339598 | 5.6  | Protein furry log-like                                                                                                                          |
| 2776             | Q95777           | 5                    | 76             | 81.2                  | 96     | 10403  | 4.5  | N-alpha-acetyltransferase 38, NatC auxiliary subunit N-alpha-acetyltransferase 38, NatC auxiliary subunit                                       |
| 2777             | P61970           | 5                    | 296            | 80.3                  | 127    | 14478  | 5.4  | Nuclear transport factor 2 Nuclear transport factor 2                                                                                           |
| 2778             | P62312           | 5                    | 27             | 76.2                  | 80     | 9128   | 9.6  | U6 snRNA-associated Sm-like protein LSM6 U6 snRNA-associated Sm-like protein LSM6                                                               |
| 2779             | P62304           | 5                    | 203            | 69.6                  | 92     | 10804  | 9.4  | Small nuclear ribonucleoprotein E Small nuclear ribonucleoprotein E                                                                             |
| 2780             | Q9Y333           | 5                    | 32             | 68.4                  | 95     | 10835  | 6.5  | U6 snRNA-associated Sm-like protein LSM2 U6 snRNA-associated Sm-like protein LSM2                                                               |
| 2781             | P68366           | 5                    | 71             | 64.5                  | 448    | 49924  | 5.1  | Tubulin alpha-4A chain Tubulin alpha-4A chain                                                                                                   |
| 2782             | P84090           | 5                    | 61             | 64.4                  | 104    | 12259  | 5.9  | Enhancer of rudimentary log Enhancer of rudimentary log DNA-directed RNA polymerase II subunit RPB9 DNA-directed RNA polymerase II subunit RPB9 |
| 2783             | P36954           | 5                    | 22             | 56                    | 125    | 14523  | 5.1  | Small nuclear ribonucleoprotein Sm D1 Small nuclear ribonucleoprotein Sm D1                                                                     |
| 2784             | P62314           | 5                    | 116            | 54.6                  | 119    | 13282  | 11.6 | Histone H2A.Z Histone H2A.Z                                                                                                                     |
| 2785             | P0C0S5           | 5                    | 62             | 53.9                  | 128    | 13553  | 10.6 | Histone H2A.V Histone H2A.V                                                                                                                     |
| 2785             | Q71UI9           | 5                    | 62             | 53.9                  | 128    | 13509  | 10.6 | Uncharacterized protein                                                                                                                         |
| 2786             | D4A492           | 5                    | 72             | 53.1                  | 81     | 8988   | 5.5  | NEDD8                                                                                                                                           |
| 2786             | Q15843           | 5                    | 72             | 53.1                  | 81     | 9072   | 8.4  | NEDD8                                                                                                                                           |
| 2786             | P29595           | 5                    | 72             | 53.1                  | 81     | 8972   | 7.2  | NEDD8                                                                                                                                           |
| 2787             | P62699           | 5                    | 5              | 52.9                  | 121    | 13842  | 7.3  | Protein yippee-like 5 Protein yippee-like 5                                                                                                     |
| 2788             | Q3U0J1           | 5                    | 26             | 51.8                  | 166    | 18223  | 8    | Peptidyl-prolyl cis-trans isomerase                                                                                                             |
| 2788             | Q9Y3C6           | 5                    | 26             | 51.8                  | 166    | 18237  | 8    | Peptidyl-prolyl cis-trans isomerase-like 1                                                                                                      |
| 2788             | Q9D0W5           | 5                    | 26             | 51.8                  | 166    | 18237  | 8    | Peptidyl-prolyl cis-trans isomerase-like 1                                                                                                      |
| 2789             | P61923           | 5                    | 170            | 50.3                  | 177    | 20198  | 4.8  | Coatomer subunit zeta-1 Coatomer subunit zeta-1                                                                                                 |
| 2789             | Q53FU3           | 5                    | 170            | 50.3                  | 177    | 20267  | 4.9  | Coatomer protein complex, subunit zeta 1 variant (Fragment)                                                                                     |
| 2790             | Q9Y3B4           | 5                    | 25             | 48                    | 125    | 14585  | 9.4  | Pre-mRNA branch site protein p14 Pre-mRNA branch site protein p14                                                                               |
| 2791             | C9JU41           | 5                    | 11             | 46.2                  | 130    | 15297  | 8.9  | Uncharacterized protein                                                                                                                         |
| 2791             | UPI0000160289    | 5                    | 11             | 44.8                  | 134    | 15610  | 8.9  | PREDICTED: hypothetical protein isoform 1                                                                                                       |
| 2791             | E9QN04           | 5                    | 11             | 44.8                  | 134    | 15601  | 8.6  | Uncharacterized protein                                                                                                                         |
| 2791             | Q8R3Q6           | 5                    | 11             | 41.7                  | 144    | 16665  | 8.2  | Coiled-coil domain-containing protein 58                                                                                                        |
| 2791             | Q4VC31           | 5                    | 11             | 41.7                  | 144    | 16620  | 7.8  | Coiled-coil domain-containing protein 58                                                                                                        |
| 2792             | P60520           | 5                    | 11             | 44.4                  | 117    | 13667  | 8.1  | Gamma-aminobutyric acid receptor-associated protein-like 2 Gamma-aminobutyric acid receptor-associated protein-like 2                           |
| 2792             | UPI0000024215    | 5                    | 11             | 44.4                  | 117    | 13681  | 8.1  | PREDICTED: gamma-aminobutyric acid receptor-associated protein-like 2-like                                                                      |
| 2793             | Q9CQE6           | 5                    | 10             | 42.6                  | 204    | 22943  | 4.4  | Histone chaperone ASF1A                                                                                                                         |
| 2793             | Q9Y294           | 5                    | 10             | 42.6                  | 204    | 22969  | 4.4  | Histone chaperone ASF1A                                                                                                                         |
| 2794             | P60840           | 5                    | 17             | 47.1                  | 121    | 13335  | 7.2  | Alpha-endosulfine                                                                                                                               |
| 2794             | O43768           | 5                    | 17             | 47.1                  | 121    | 13389  | 7.2  | Alpha-endosulfine                                                                                                                               |
| 2794             | E9PB69           | 5                    | 17             | 42.9                  | 133    | 14868  | 6.6  | Uncharacterized protein                                                                                                                         |
| 2794             | O43768-4         | 5                    | 17             | 40.7                  | 140    | 15534  | 8.7  | Isoform 4 of Alpha-endosulfine                                                                                                                  |
| 2794             | C9JUF4           | 5                    | 17             | 39.6                  | 144    | 16047  | 7.2  | Uncharacterized protein                                                                                                                         |
| 2794             | Q5T5H1           | 5                    | 17             | 30.5                  | 187    | 20994  | 7.8  | Endosulfine alpha                                                                                                                               |
| 2795             | B4DJP9           | 5                    | 38             | 37                    | 165    | 20117  | 10.1 | cDNA FLJ58902, highly similar to FUS-interacting serine-arginine-rich protein1                                                                  |
| 2795             | Q5JRI1           | 5                    | 38             | 35.5                  | 172    | 20913  | 10.5 | FUS interacting protein (Serine/arginine-rich) 1                                                                                                |

Table S1. Proteins identified in the OVCAR-3 tumor supernatant by two or more unique peptides.

| Protein or Group | Accession Number | Unique Peptide Count | Spectrum Count | Sequence Coverage (%) | Length | MolWt | pI   | Descriptive Name                                                                                                                                          |
|------------------|------------------|----------------------|----------------|-----------------------|--------|-------|------|-----------------------------------------------------------------------------------------------------------------------------------------------------------|
| 2795             | O75494-4         | 5                    | 38             | 35.3                  | 173    | 21000 | 10.5 | Isoform 4 of Serine/arginine-rich splicing factor 10<br>FUS interacting protein (Serine/arginine-rich) 1 FUS interacting protein (Serine/arginine-rich) 1 |
| 2795             | Q5JRI3           | 5                    | 38             | 33.5                  | 182    | 22135 | 10.3 | Putative uncharacterized protein                                                                                                                          |
| 2795             | Q3UDH7           | 5                    | 38             | 33.3                  | 183    | 22137 | 10.4 | FUS interacting protein (Serine-arginine rich) 1 FUS interacting protein (Serine-arginine rich) 1                                                         |
| 2795             | Q3UA07           | 5                    | 38             | 33.3                  | 183    | 22222 | 10.3 | Isoform 2 of Serine/arginine-rich splicing factor 10 Isoform 2 of Serine/arginine-rich splicing factor 10                                                 |
| 2795             | O75494-2         | 5                    | 38             | 23.4                  | 261    | 31213 | 11.3 | FUS interacting protein (Serine-arginine rich) 1 isoform 2 variant (Fragment)                                                                             |
| 2795             | Q53GD7           | 5                    | 38             | 23.3                  | 262    | 31282 | 11.3 | Serine/arginine-rich splicing factor 10 Serine/arginine-rich splicing factor 10                                                                           |
| 2795             | O75494           | 5                    | 38             | 23.3                  | 262    | 31301 | 11.3 | Putative uncharacterized protein                                                                                                                          |
| 2795             | Q3UYX6           | 5                    | 38             | 21.9                  | 278    | 33158 | 11.1 | Putative uncharacterized protein                                                                                                                          |
| 2796             | Q3TR90           | 5                    | 16             | 36                    | 178    | 19822 | 8.8  | Hepatoma-derived growth factor-related protein 3                                                                                                          |
| 2796             | Q9JMG7           | 5                    | 16             | 31.7                  | 202    | 22431 | 8.4  | Hepatoma-derived growth factor-related protein 3                                                                                                          |
| 2796             | Q9Y3E1           | 5                    | 16             | 31.5                  | 203    | 22620 | 8    | Isoform 2 of Hepatoma-derived growth factor-related protein 3                                                                                             |
| 2796             | Q9JMG7-2         | 5                    | 16             | 31.2                  | 205    | 22819 | 8.6  | 60S ribosomal protein L34                                                                                                                                 |
| 2797             | P49207           | 5                    | 29             | 35.9                  | 117    | 13293 | 11.5 | 60S ribosomal protein L34                                                                                                                                 |
| 2797             | Q9D1R9           | 5                    | 29             | 35.9                  | 117    | 13293 | 11.5 | Cysteine and glycine-rich protein 3                                                                                                                       |
| 2798             | P50461           | 5                    | 8              | 33.5                  | 194    | 20969 | 8.5  | Cysteine and glycine-rich protein 3                                                                                                                       |
| 2798             | P50462           | 5                    | 8              | 33.5                  | 194    | 20895 | 8.5  | cDNA FLJ57134, moderately similar to DCN1-like protein 4                                                                                                  |
| 2799             | B4DP84           | 5                    | 7              | 32.1                  | 168    | 20055 | 4.9  | DCN1-like protein 5                                                                                                                                       |
| 2799             | Q9CXV9           | 5                    | 7              | 22.8                  | 237    | 27579 | 5.4  | DCN1-like protein 5                                                                                                                                       |
| 2799             | Q9BTE7           | 5                    | 7              | 22.8                  | 237    | 27508 | 5.6  | Uncharacterized protein                                                                                                                                   |
| 2800             | C9JXB8           | 5                    | 85             | 39.7                  | 121    | 14369 | 11.3 | Uncharacterized protein                                                                                                                                   |
| 2800             | E9Q132           | 5                    | 85             | 36.1                  | 133    | 15347 | 10.9 | Ribosomal protein L24, isoform CRA_e                                                                                                                      |
| 2800             | C9JNW5           | 5                    | 85             | 32                    | 150    | 17543 | 10.8 | 60S ribosomal protein L24 60S ribosomal protein L24                                                                                                       |
| 2800             | P83731           | 5                    | 85             | 30.6                  | 157    | 17779 | 11.3 | Uncharacterized protein                                                                                                                                   |
| 2800             | E9QNJ0           | 5                    | 85             | 30.2                  | 159    | 18195 | 11   | Putative uncharacterized protein                                                                                                                          |
| 2800             | Q3UW40           | 5                    | 85             | 30                    | 160    | 18253 | 11   | cDNA FLJ55318, highly similar to Casein kinase I isoform alpha (EC 2.7.11.1)                                                                              |
| 2801             | B4E1D9           | 5                    | 9              | 31.6                  | 228    | 26745 | 9.7  | Putative uncharacterized protein                                                                                                                          |
| 2801             | Q3U772           | 5                    | 9              | 21.4                  | 337    | 38975 | 9.6  | Casein kinase I isoform alpha Casein kinase I isoform alpha                                                                                               |
| 2801             | P48729           | 5                    | 9              | 19.3                  | 337    | 38915 | 9.6  | Uncharacterized protein                                                                                                                                   |
| 2801             | E9PWB2           | 5                    | 9              | 21.4                  | 374    | 43402 | 9.4  | Survival of motor neuron-related-splicing factor 30                                                                                                       |
| 2802             | O75940           | 5                    | 10             | 31.1                  | 238    | 26711 | 7.3  | Survival of motor neuron-related-splicing factor 30                                                                                                       |
| 2802             | Q8BGT7           | 5                    | 10             | 31.1                  | 238    | 26753 | 7.3  | 40S ribosomal protein S13 (Fragment)                                                                                                                      |
| 2803             | P62279           | 5                    | 74             | 43.9                  | 107    | 12034 | 10.6 | 40S ribosomal protein S13 40S ribosomal protein S13                                                                                                       |
| 2803             | P62277           | 5                    | 74             | 31.1                  | 151    | 17222 | 10.5 | PREDICTED: 40S ribosomal protein S13-like                                                                                                                 |
| 2803             | UPI0000605E36    | 5                    | 74             | 31.1                  | 151    | 17248 | 10.6 | PREDICTED: 40S ribosomal protein S13-like                                                                                                                 |
| 2803             | UPI00001E4734    | 5                    | 74             | 31.1                  | 151    | 17070 | 10.2 | 60S ribosomal protein L36                                                                                                                                 |
| 2804             | D3Z3R1           | 5                    | 27             | 30.8                  | 104    | 12130 | 11.4 | 60S ribosomal protein L36                                                                                                                                 |
| 2804             | D3YW41           | 5                    | 27             | 30.5                  | 105    | 12256 | 11.4 | PREDICTED: 60S ribosomal protein L36-like                                                                                                                 |
| 2804             | UPI0000023ED2    | 5                    | 27             | 30.5                  | 105    | 12313 | 11.3 | 60S ribosomal protein L36 60S ribosomal protein L36                                                                                                       |
| 2804             | Q9Y3U8           | 5                    | 27             | 30.5                  | 105    | 12254 | 11.6 | 60S ribosomal protein L36                                                                                                                                 |
| 2804             | Q5M9L1           | 5                    | 27             | 30.5                  | 105    | 12297 | 11.6 | Endothelial differentiation-related factor 1                                                                                                              |
| 2805             | O60869-2         | 5                    | 25             | 32.4                  | 139    | 15481 | 9.8  | Endothelial differentiation-related factor 1                                                                                                              |
| 2805             | O60869           | 5                    | 25             | 30.4                  | 148    | 16369 | 10   | Endothelial differentiation-related factor 1                                                                                                              |
| 2805             | Q9JMG1           | 5                    | 25             | 30.4                  | 148    | 16369 | 10   | cDNA, FLJ94243                                                                                                                                            |
| 2806             | B2RE68           | 5                    | 8              | 30.1                  | 196    | 21681 | 6.9  | Chronic lymphocytic leukemia deletion region gene 6 protein                                                                                               |
| 2806             | Q5W111           | 5                    | 8              | 30.1                  | 196    | 21666 | 6.7  | Chronic lymphocytic leukemia deletion region gene 6 protein log                                                                                           |
| 2806             | Q3TFQ1           | 5                    | 8              | 30.1                  | 196    | 21681 | 6.7  | Isoform 2 of Syntaxin-7                                                                                                                                   |
| 2807             | O15400-2         | 5                    | 18             | 27.6                  | 239    | 27400 | 5.1  | Syntaxin-7                                                                                                                                                |
| 2807             | O15400           | 5                    | 18             | 25.3                  | 261    | 29816 | 5.6  | Putative uncharacterized protein                                                                                                                          |
| 2807             | Q9DCE1           | 5                    | 18             | 25.3                  | 261    | 29747 | 5.6  | Syntaxin 7                                                                                                                                                |
| 2807             | Q8BH40           | 5                    | 18             | 25.3                  | 261    | 29737 | 5.6  | Syntaxin-7                                                                                                                                                |
| 2807             | O70439           | 5                    | 18             | 25.3                  | 261    | 29821 | 5.8  | cDNA FLJ53135, highly similar to Choline-phosphate cytidyltransferase A (EC 2.7.7.15)                                                                     |
| 2808             | B4E322           | 5                    | 7              | 23.5                  | 328    | 37368 | 7.8  | Choline-phosphate cytidyltransferase A                                                                                                                    |
| 2808             | P49586           | 5                    | 7              | 21                    | 367    | 41667 | 7    | Choline-phosphate cytidyltransferase A                                                                                                                    |
| 2808             | P49585           | 5                    | 7              | 21                    | 367    | 41731 | 7.3  | Uncharacterized protein                                                                                                                                   |
| 2808             | C9JEJ2           | 5                    | 7              | 20.3                  | 380    | 43264 | 8.5  | Uncharacterized protein                                                                                                                                   |
| 2809             | E9QKW3           | 5                    | 15             | 22.8                  | 268    | 30833 | 11.5 | Serine/arginine-rich splicing factor 5                                                                                                                    |
| 2809             | Q09167           | 5                    | 15             | 22.7                  | 269    | 30891 | 11.6 | MCG7614, isoform CRA_c                                                                                                                                    |
| 2809             | Q9D8S5           | 5                    | 15             | 22.6                  | 270    | 30978 | 11.6 | Serine/arginine-rich splicing factor 5                                                                                                                    |
| 2809             | Q35326           | 5                    | 15             | 22.6                  | 270    | 30945 | 11.4 | Serine/arginine-rich splicing factor 5                                                                                                                    |
| 2809             | Q13243           | 5                    | 15             | 22.4                  | 272    | 31264 | 11.6 | CS0DF038Y005 variant (Fragment)                                                                                                                           |
| 2809             | Q59EK7           | 5                    | 15             | 18.7                  | 326    | 37254 | 11   | Syntaxin-binding protein 6                                                                                                                                |
| 2810             | Q8NFX7           | 5                    | 7              | 21.9                  | 210    | 23554 | 9    | Syntaxin-binding protein 6                                                                                                                                |
| 2810             | Q8R3T5           | 5                    | 7              | 21.9                  | 210    | 23671 | 9.2  | Isoform 2 of Syntaxin-binding protein 6                                                                                                                   |
| 2810             | Q8NFX7-2         | 5                    | 7              | 21.9                  | 210    | 23587 | 9.3  | Isoform Non-brain of Clathrin light chain B                                                                                                               |
| 2811             | P09497-2         | 5                    | 7              | 21.3                  | 211    | 23181 | 4.7  | Isoform 2 of Clathrin light chain B                                                                                                                       |
| 2811             | Q6IRU5-2         | 5                    | 7              | 21.3                  | 211    | 23174 | 4.7  | Putative uncharacterized protein                                                                                                                          |
| 2811             | Q3TJ95           | 5                    | 7              | 21.3                  | 211    | 23116 | 4.7  | UPI000059DE07 UniRef100 entry                                                                                                                             |
| 2812             | UPI000059DE07    | 5                    | 7              | 24.8                  | 270    | 32003 | 9.3  | UPI00016114EC UniRef100 entry                                                                                                                             |
| 2812             | UPI00016114EC    | 5                    | 7              | 23.3                  | 287    | 33610 | 9.5  | Isoform 2 of Bifunctional arginine demethylase and lysyl-hydroxylase JMJD6                                                                                |
| 2812             | Q9ERI5-2         | 5                    | 7              | 22.5                  | 298    | 35177 | 8.6  | UPI00016114ED UniRef100 entry                                                                                                                             |
| 2812             | UPI00016114ED    | 5                    | 7              | 21.7                  | 309    | 35863 | 8.9  | Jmjd6 protein (Fragment)                                                                                                                                  |
| 2812             | A4FUJ3           | 5                    | 7              | 21.1                  | 317    | 36633 | 9    | Phosphatidylserine receptor transcript variant 1                                                                                                          |
| 2812             | B2WTI3           | 5                    | 7              | 20                    | 335    | 39241 | 9.5  | Phosphatidylserine receptor transcript variant 1                                                                                                          |
| 2812             | B2WTI1           | 5                    | 7              | 20                    | 335    | 39361 | 9.6  | Uncharacterized protein                                                                                                                                   |
| 2812             | E9PVN0           | 5                    | 7              | 19                    | 352    | 41000 | 9.3  | Phosphatidylserine receptor transcript variant 2                                                                                                          |
| 2812             | B2WTI4           | 5                    | 7              | 18.6                  | 361    | 42003 | 9.5  | Isoform 2 of Bifunctional arginine demethylase and lysyl-hydroxylase JMJD6                                                                                |
| 2812             | Q6NYC1-2         | 5                    | 7              | 18                    | 372    | 43109 | 8.9  | Bifunctional arginine demethylase and lysyl-hydroxylase JMJD6                                                                                             |
| 2812             | Q9ERI5           | 5                    | 7              | 16.6                  | 403    | 46567 | 8.9  | Bifunctional arginine demethylase and lysyl-hydroxylase JMJD6                                                                                             |
| 2812             | Q6NYC1           | 5                    | 7              | 16.6                  | 403    | 46462 | 8.7  | Phosphatidylserine receptor transcript variant 2                                                                                                          |
| 2812             | B2WTI2           | 5                    | 7              | 16                    | 420    | 48221 | 8.2  | Uncharacterized protein                                                                                                                                   |
| 2813             | D3Z5F7           | 5                    | 6              | 19.8                  | 333    | 37245 | 8.4  | BCL2L2-PABPN1 protein                                                                                                                                     |
| 2813             | UPI00005A1655    | 5                    | 6              | 19.8                  | 333    | 37199 | 8.4  | E3 ubiquitin-protein ligase RING2                                                                                                                         |
| 2814             | Q99496           | 5                    | 6              | 19                    | 336    | 37655 | 6.8  | E3 ubiquitin-protein ligase RING2                                                                                                                         |
| 2814             | Q9CQJ4           | 5                    | 6              | 19                    | 336    | 37623 | 6.8  | Tubulin gamma-1 chain                                                                                                                                     |
| 2815             | P23258           | 5                    | 5              | 18.6                  | 451    | 51170 | 6.1  | Tubulin gamma-1 chain                                                                                                                                     |
| 2815             | P83887           | 5                    | 5              | 18.6                  | 451    | 51101 | 6    | DnaJ                                                                                                                                                      |
| 2816             | A7LUJ17          | 5                    | 5              | 17                    | 241    | 26916 | 7.6  | Isoform B of DnaJ log subfamily B member 6                                                                                                                |
| 2816             | O75190-2         | 5                    | 5              | 17                    | 241    | 26900 | 7.6  | Isoform B of DnaJ log subfamily B member 6                                                                                                                |
| 2816             | O54946-2         | 5                    | 5              | 16.9                  | 242    | 26978 | 7.6  | Isoform C of DnaJ log subfamily B member 6                                                                                                                |
| 2816             | O75190-3         | 5                    | 5              | 12.6                  | 325    | 35714 | 6.9  | DnaJ log subfamily B member 6                                                                                                                             |
| 2816             | O75190           | 5                    | 5              | 12.6                  | 326    | 36087 | 9.1  | cDNA FLJ76979, highly similar to sapiens DnaJ (Hsp40) log, subfamily B, member 6 (DNAJB6), transcript variant 1, mRNA                                     |
| 2816             | A8KAGO           | 5                    | 5              | 12.6                  | 326    | 36015 | 9.2  | DnaJ log subfamily B member 6                                                                                                                             |
| 2816             | O54946           | 5                    | 5              | 11.2                  | 365    | 39807 | 9.4  | Isoform 2 of Zinc finger Ran-binding domain-containing protein 2                                                                                          |
| 2817             | Q9R020-2         | 5                    | 13             | 19.5                  | 293    | 33321 | 10   |                                                                                                                                                           |

Table S1. Proteins identified in the OVCAR-3 tumor supernatant by two or more unique peptides.

| Protein or Protein Group | Accession Number | Unique Peptide Count | Spectrum Count | Sequence Coverage (%) | Length | MolWt  | pI   | Descriptive Name                                                                                                |
|--------------------------|------------------|----------------------|----------------|-----------------------|--------|--------|------|-----------------------------------------------------------------------------------------------------------------|
| 2817                     | E9PUD0           | 5                    | 13             | 19.5                  | 293    | 33264  | 9.9  | Uncharacterized protein                                                                                         |
| 2817                     | Q5R580           | 5                    | 13             | 17.8                  | 320    | 36318  | 9.8  | Zinc finger Ran-binding domain-containing protein 2                                                             |
| 2817                     | Q9R020           | 5                    | 13             | 17.3                  | 330    | 37350  | 9.9  | Zinc finger Ran-binding domain-containing protein 2                                                             |
| 2817                     | Q95218           | 5                    | 13             | 17.3                  | 330    | 37404  | 10   | Zinc finger Ran-binding domain-containing protein 2                                                             |
| 2817                     | D3Z4U0           | 5                    | 13             | 17.3                  | 330    | 37295  | 9.6  | Uncharacterized protein                                                                                         |
| 2817                     | D3Z4T9           | 5                    | 13             | 16.8                  | 340    | 38364  | 9.9  | Uncharacterized protein                                                                                         |
| 2818                     | E7EQW6           | 5                    | 7              | 18                    | 399    | 44771  | 7.2  | Uncharacterized protein                                                                                         |
| 2818                     | B4DP99           | 5                    | 7              | 18                    | 399    | 44737  | 7.2  | cDNA FLJ51496, highly similar to Tyrosine-protein kinase CSK (EC 2.7.10.2)                                      |
| 2818                     | A8K3B6           | 5                    | 7              | 16                    | 450    | 50702  | 7.1  | cDNA FLJ78579, highly similar to sapiens c-src tyrosine kinase (CSK), mRNA                                      |
| 2818                     | Q8VCW1           | 5                    | 7              | 16                    | 450    | 50716  | 7.1  | C-src tyrosine kinase                                                                                           |
| 2818                     | Q53EL3           | 5                    | 7              | 16                    | 449    | 50617  | 7.1  | C-src tyrosine kinase variant (Fragment)                                                                        |
| 2818                     | Q3UVH2           | 5                    | 7              | 16                    | 450    | 50730  | 7.1  | Putative uncharacterized protein                                                                                |
| 2818                     | P41240           | 5                    | 7              | 16                    | 450    | 50704  | 7.1  | Tyrosine-protein kinase CSK                                                                                     |
| 2818                     | B5BU52           | 5                    | 7              | 16                    | 450    | 50674  | 7.1  | C-src tyrosine kinase                                                                                           |
| 2819                     | P16403           | 5                    | 61             | 16                    | 213    | 21365  | 10.9 | Histone H1.2                                                                                                    |
| 2819                     | P15864           | 5                    | 61             | 16                    | 212    | 21267  | 11   | Histone H1.2                                                                                                    |
| 2819                     | A3R0T7           | 5                    | 61             | 15.5                  | 219    | 21879  | 11   | Liver histone H1e                                                                                               |
| 2819                     | Q4VB24           | 5                    | 61             | 15.5                  | 219    | 21893  | 11   | Histone cluster 1, H1e                                                                                          |
| 2819                     | P10412           | 5                    | 61             | 15.5                  | 219    | 21865  | 11   | Histone H1.4                                                                                                    |
| 2819                     | B2R984           | 5                    | 61             | 15.5                  | 219    | 21893  | 11   | cDNA, FLJ94268, highly similar to sapiens histone 1, H1e (HIST1H1E), mRNA                                       |
| 2819                     | Q3U292           | 5                    | 61             | 15.4                  | 221    | 22082  | 11   | Putative uncharacterized protein                                                                                |
| 2819                     | P43277           | 5                    | 61             | 15.4                  | 221    | 22099  | 11   | Histone H1.3                                                                                                    |
| 2819                     | P16402           | 5                    | 61             | 15.4                  | 221    | 22350  | 11   | Histone H1.3                                                                                                    |
| 2820                     | Q95758-1         | 5                    | 35             | 15                    | 521    | 56502  | 9.2  | Isoform 1 of Regulator of differentiation 1                                                                     |
| 2820                     | B1ALY5           | 5                    | 35             | 14.9                  | 524    | 56821  | 9.2  | ROD1 regulator of differentiation 1 (S. pombe)                                                                  |
| 2820                     | Q8BHD7           | 5                    | 35             | 14.9                  | 523    | 56701  | 9.1  | Regulator of differentiation 1                                                                                  |
| 2820                     | E9QKT3           | 5                    | 35             | 14.2                  | 551    | 59465  | 8.9  | Uncharacterized protein                                                                                         |
| 2820                     | Q95758           | 5                    | 35             | 14.1                  | 552    | 59690  | 9    | Regulator of differentiation 1                                                                                  |
| 2820                     | Q95758-4         | 5                    | 35             | 14                    | 558    | 60417  | 9.2  | Isoform 4 of Regulator of differentiation 1                                                                     |
| 2821                     | Q5JB52           | 5                    | 11             | 12.8                  | 508    | 56467  | 7.6  | Stromal RNA regulating factor                                                                                   |
| 2821                     | B7WPG3           | 5                    | 11             | 12.8                  | 508    | 56451  | 7.8  | Uncharacterized protein                                                                                         |
| 2821                     | A8K894           | 5                    | 11             | 12.1                  | 537    | 59667  | 7.9  | cDNA FLJ77927                                                                                                   |
| 2821                     | Q8WVV9-4         | 5                    | 11             | 12.1                  | 537    | 59648  | 7.7  | Isoform 4 of Heterogeneous nuclear ribonucleoprotein L-like                                                     |
| 2821                     | C9J9G0           | 5                    | 11             | 12.1                  | 537    | 59664  | 7.9  | Heterogeneous nuclear ribonucleoprotein L-like, isoform CRA_a                                                   |
| 2821                     | Q8WVV9           | 5                    | 11             | 12                    | 542    | 60083  | 7.7  | Heterogeneous nuclear ribonucleoprotein L-like                                                                  |
| 2821                     | D6W592           | 5                    | 11             | 12                    | 542    | 60099  | 7.9  | Heterogeneous nuclear ribonucleoprotein L-like, isoform CRA_d                                                   |
| 2821                     | UPI0001F78AAD    | 5                    | 11             | 11.1                  | 587    | 63225  | 6.8  | UPI0001F78AAD UniRef100 entry                                                                                   |
| 2821                     | Q9CSH0           | 5                    | 11             | 11.1                  | 588    | 63391  | 6.9  | Putative uncharacterized protein (Fragment)                                                                     |
| 2821                     | Q921F4           | 5                    | 11             | 11                    | 591    | 64125  | 5.8  | Heterogeneous nuclear ribonucleoprotein L-like                                                                  |
| 2822                     | B5BU99           | 5                    | 14             | 9.1                   | 570    | 61320  | 9.1  | High glucose-regulated protein 8                                                                                |
| 2822                     | Q9Y5A9           | 5                    | 14             | 9                     | 579    | 62334  | 8.8  | YTH domain family protein 2                                                                                     |
| 2822                     | Q91YT7           | 5                    | 14             | 9                     | 579    | 62280  | 8.8  | Putative uncharacterized protein                                                                                |
| 2822                     | Q8K325           | 5                    | 14             | 9                     | 579    | 62306  | 8.8  | YTH domain family 2                                                                                             |
| 2822                     | Q8BM70           | 5                    | 14             | 9                     | 579    | 62308  | 8.9  | Putative uncharacterized protein                                                                                |
| 2822                     | Q3TWU3           | 5                    | 14             | 9                     | 579    | 62294  | 8.8  | Putative uncharacterized protein                                                                                |
| 2822                     | E9Q2W5           | 5                    | 14             | 8.9                   | 584    | 62788  | 8.2  | Uncharacterized protein                                                                                         |
| 2823                     | B3KY11           | 5                    | 21             | 8.4                   | 800    | 93234  | 9.5  | cDNA FLJ46571 fis, clone THYMU3041428, highly similar to Probable ATP-dependent RNA helicase DDX23 (EC 3.6.1.-) |
| 2823                     | Q9BUQ8           | 5                    | 21             | 8.2                   | 820    | 95583  | 9.6  | Probable ATP-dependent RNA helicase DDX23                                                                       |
| 2823                     | D3Z0M9           | 5                    | 21             | 8.2                   | 819    | 95495  | 9.6  | MCG18410, isoform CRA_a                                                                                         |
| 2824                     | Q719H9           | 5                    | 10             | 23.7                  | 257    | 29405  | 7.1  | BTB/POZ domain-containing protein KCTD1                                                                         |
| 2824                     | Q5M956-2         | 5                    | 10             | 23                    | 265    | 30381  | 7.1  | Isoform 2 of BTB/POZ domain-containing protein KCTD1                                                            |
| 2824                     | E9Q6T9           | 5                    | 10             | 7.1                   | 861    | 96115  | 5.8  | Uncharacterized protein                                                                                         |
| 2824                     | UPI00018848F1    | 5                    | 10             | 7.1                   | 865    | 96414  | 5.7  | BTB/POZ domain-containing protein KCTD1 isoform b                                                               |
| 2825                     | A2CF96           | 5                    | 9              | 5.7                   | 937    | 104358 | 5.5  | Kinesin family member 1C (Fragment)                                                                             |
| 2825                     | Q5SX63           | 5                    | 9              | 5.7                   | 937    | 104342 | 5.5  | Kinesin family member 1C (Fragment)                                                                             |
| 2825                     | Q8VI89           | 5                    | 9              | 4.8                   | 1100   | 122469 | 7.1  | Kinesin superfamily protein 1C                                                                                  |
| 2825                     | Q43896           | 5                    | 9              | 4.8                   | 1103   | 122947 | 6.9  | Kinesin-like protein KIF1C                                                                                      |
| 2825                     | Q35071           | 5                    | 9              | 4.8                   | 1100   | 122434 | 7    | Kinesin-like protein KIF1C                                                                                      |
| 2825                     | E9Q9B0           | 5                    | 9              | 4.8                   | 1112   | 123759 | 6.9  | Uncharacterized protein                                                                                         |
| 2825                     | A2CF97           | 5                    | 9              | 4.8                   | 1100   | 122450 | 7    | Kinesin family member 1C                                                                                        |
| 2825                     | Q6A011           | 5                    | 9              | 4.7                   | 1120   | 124573 | 6.8  | MKIAA0706 protein (Fragment)                                                                                    |
| 2826                     | Q7L2E3-3         | 5                    | 7              | 5.3                   | 1155   | 129438 | 8.5  | Isoform 3 of Putative ATP-dependent RNA helicase DHX30                                                          |
| 2826                     | D3Z2J3           | 5                    | 7              | 5.1                   | 1186   | 133028 | 8.6  | Uncharacterized protein                                                                                         |
| 2826                     | Q7L2E3           | 5                    | 7              | 5.1                   | 1194   | 133938 | 8.8  | Putative ATP-dependent RNA helicase DHX30                                                                       |
| 2826                     | Q99PU8-3         | 5                    | 7              | 5                     | 1223   | 136486 | 8.4  | Isoform 3 of Putative ATP-dependent RNA helicase DHX30                                                          |
| 2826                     | Q99PU8           | 5                    | 7              | 5                     | 1217   | 136668 | 8.7  | Putative ATP-dependent RNA helicase DHX30                                                                       |
| 2826                     | Q7L2E3-2         | 5                    | 7              | 5                     | 1222   | 136115 | 8.6  | Isoform 2 of Putative ATP-dependent RNA helicase DHX30                                                          |
| 2827                     | Q60817           | 5                    | 56             | 32.6                  | 215    | 23384  | 4.6  | Nascent polypeptide-associated complex subunit alpha                                                            |
| 2827                     | Q13765           | 5                    | 56             | 32.6                  | 215    | 23384  | 4.6  | Nascent polypeptide-associated complex subunit alpha                                                            |
| 2827                     | E9PAV3           | 5                    | 56             | 3.4                   | 2078   | 205419 | 9.6  | Uncharacterized protein                                                                                         |
| 2827                     | P70670           | 5                    | 56             | 3.2                   | 2187   | 220599 | 9.4  | Nascent polypeptide-associated complex subunit alpha, muscle-specific form                                      |
| 2827                     | E9QMB1           | 5                    | 56             | 3.2                   | 2187   | 220497 | 9.3  | Uncharacterized protein                                                                                         |
| 2828                     | Q923D4           | 5                    | 12             | 83.7                  | 86     | 10119  | 6.4  | Splicing factor 3B subunit 5                                                                                    |
| 2829                     | Q91VW3           | 5                    | 48             | 75.3                  | 93     | 10477  | 5.1  | SH3 domain-binding glutamic acid-rich-like protein 3                                                            |
| 2830                     | P01887           | 5                    | 12             | 67.2                  | 119    | 13823  | 8    | Beta-2-microglobulin                                                                                            |
| 2831                     | P52760           | 5                    | 6              | 61.5                  | 135    | 14255  | 8.7  | Ribonuclease UK114                                                                                              |
| 2832                     | P63254           | 5                    | 15             | 59.7                  | 77     | 8550   | 8.6  | Cysteine-rich protein 1                                                                                         |
| 2832                     | Q8C2N7           | 5                    | 15             | 59.7                  | 77     | 8562   | 8.6  | Putative uncharacterized protein                                                                                |
| 2833                     | Q9CRB1           | 5                    | 15             | 56.6                  | 136    | 15202  | 6.9  | Lectin, galactose binding, soluble 7                                                                            |
| 2834                     | O89086           | 5                    | 33             | 52.9                  | 153    | 16605  | 7.5  | Putative RNA-binding protein 3                                                                                  |
| 2835                     | P62075           | 5                    | 8              | 52.6                  | 95     | 10458  | 8.2  | Mitochondrial import inner membrane translocase subunit Tim13                                                   |
| 2836                     | P32848           | 5                    | 7              | 51.8                  | 110    | 11931  | 5.2  | Parvalbumin alpha                                                                                               |
| 2837                     | Q61025           | 5                    | 10             | 51.5                  | 132    | 15236  | 5.1  | Intraflagellar transport protein 20 homolog                                                                     |
| 2838                     | Q8VBV7           | 5                    | 14             | 50.2                  | 209    | 23256  | 5.2  | COP9 signalosome complex subunit 8                                                                              |
| 2839                     | Q9WU28           | 5                    | 43             | 50                    | 154    | 17356  | 6.3  | Prefoldin subunit 5                                                                                             |
| 2840                     | Q9D967           | 5                    | 6              | 48.8                  | 164    | 18582  | 6.8  | Magnesium-dependent phosphatase 1                                                                               |
| 2841                     | P62627           | 5                    | 27             | 52.1                  | 96     | 10990  | 7.2  | Dynein light chain roadblock-type 1                                                                             |
| 2841                     | A2AVR9           | 5                    | 27             | 48.1                  | 104    | 11928  | 6    | Dynein light chain roadblock-type 1                                                                             |
| 2842                     | P47957           | 5                    | 11             | 46.7                  | 180    | 19724  | 6.8  | Adenine phosphoribosyltransferase                                                                               |
| 2843                     | Q9WV85           | 5                    | 11             | 44.4                  | 169    | 19099  | 6.7  | Nucleoside diphosphate kinase 3                                                                                 |
| 2844                     | Q8VED9           | 5                    | 15             | 43.6                  | 172    | 18956  | 5.4  | Galectin-related protein A                                                                                      |
| 2845                     | O70591           | 5                    | 50             | 42.2                  | 154    | 16534  | 6.6  | Prefoldin subunit 2                                                                                             |
| 2846                     | Q64433           | 5                    | 14             | 42.2                  | 102    | 10963  | 8.3  | 10 kDa heat shock protein, mitochondrial                                                                        |
| 2847                     | Q9QXA5           | 5                    | 26             | 41.6                  | 137    | 15076  | 10.1 | U6 snRNA-associated Sm-like protein LSM4                                                                        |
| 2847                     | Q9CY46           | 5                    | 26             | 41.3                  | 138    | 15204  | 10.1 | LSM4 homolog, U6 small nuclear RNA associated (S. cerevisiae), isoform CRA_b                                    |
| 2848                     | P07091           | 5                    | 91             | 40.6                  | 101    | 11721  | 5.3  | Protein S100-A4                                                                                                 |
| 2849                     | P10639           | 5                    | 158            | 40                    | 105    | 11675  | 4.9  | Thioredoxin                                                                                                     |

Table S1. Proteins identified in the OVCAR-3 tumor supernatant by two or more unique peptides.

| Protein or Group | Accession Number | Unique Peptide Count | Spectrum Count | Sequence Coverage (%) | Length | MolWt  | pI   | Descriptive Name                                                                     |
|------------------|------------------|----------------------|----------------|-----------------------|--------|--------|------|--------------------------------------------------------------------------------------|
| 2850             | Q9CQ08           | 5                    | 14             | 39.8                  | 103    | 11636  | 5.3  | U6 snRNA-associated Sm-like protein LSm7                                             |
| 2851             | Q9Z0F7           | 5                    | 21             | 39.8                  | 123    | 13160  | 4.7  | Gamma-synuclein                                                                      |
| 2852             | Q3U3C2           | 5                    | 9              | 38.9                  | 149    | 16472  | 7.7  | Putative uncharacterized protein                                                     |
| 2852             | Q9Z0J0           | 5                    | 9              | 38.9                  | 149    | 16442  | 7.7  | Epididymal secretory protein E1                                                      |
| 2852             | Q3U8F7           | 5                    | 9              | 38.9                  | 149    | 16442  | 7.7  | Putative uncharacterized protein                                                     |
| 2853             | Q8BN80           | 5                    | 10             | 38.9                  | 190    | 21432  | 6.8  | Putative uncharacterized protein                                                     |
| 2853             | Q9CX80           | 5                    | 10             | 38.9                  | 190    | 21466  | 6.8  | Cytoglobin                                                                           |
| 2854             | Q9CPT4           | 5                    | 18             | 38.6                  | 166    | 17982  | 6.8  | UPF0556 protein C19orf10 homolog                                                     |
| 2855             | Q9JM76           | 5                    | 36             | 38.2                  | 178    | 20525  | 8.6  | Actin-related protein 2/3 complex subunit 3                                          |
| 2856             | Q8K2Q0           | 5                    | 11             | 37.4                  | 198    | 21850  | 5.8  | COMM domain-containing protein 9                                                     |
| 2857             | Q9D7S9           | 5                    | 13             | 37.4                  | 219    | 24576  | 4.8  | Charged multivesicular body protein 5                                                |
| 2858             | P16254           | 5                    | 11             | 37.3                  | 110    | 12510  | 10.2 | Signal recognition particle 14 kDa protein                                           |
| 2859             | Q78KL9           | 5                    | 9              | 41                    | 205    | 23613  | 6.2  | Rexo2 protein                                                                        |
| 2859             | Q3TAV0           | 5                    | 9              | 37.5                  | 224    | 25372  | 6.6  | Putative uncharacterized protein (Fragment)                                          |
| 2859             | Q319B4           | 5                    | 9              | 35.4                  | 237    | 26667  | 7.5  | Putative uncharacterized protein                                                     |
| 2859             | Q9D8S4           | 5                    | 9              | 35.4                  | 237    | 26739  | 7.2  | Oligoribonuclease, mitochondrial                                                     |
| 2860             | Q9CQI7           | 5                    | 15             | 35.1                  | 225    | 25323  | 9.7  | U2 small nuclear ribonucleoprotein B"                                                |
| 2861             | Q8JZY2           | 5                    | 5              | 33.2                  | 202    | 22812  | 6.7  | COMM domain-containing protein 10                                                    |
| 2862             | UPI0000024400    | 5                    | 24             | 32.7                  | 214    | 24547  | 10.1 | PREDICTED: 60S ribosomal protein L10-like isoform 2                                  |
| 2863             | Q91XZ3           | 5                    | 25             | 32.4                  | 207    | 23867  | 5.6  | Orm1 protein                                                                         |
| 2864             | UPI0001547DD8    | 5                    | 23             | 33.8                  | 145    | 16265  | 9.2  | mitochondrial fission 1 protein isoform 2                                            |
| 2864             | Q9CQ92           | 5                    | 23             | 32.2                  | 152    | 17009  | 8.5  | Mitochondrial fission 1 protein                                                      |
| 2865             | B2MOR9           | 5                    | 7              | 31.2                  | 157    | 17774  | 8.4  | TU11 isoform A                                                                       |
| 2865             | P21126           | 5                    | 7              | 31.2                  | 157    | 17801  | 8.4  | Ubiquitin-like protein 4A                                                            |
| 2865             | B2MOS0           | 5                    | 7              | 31.2                  | 157    | 17791  | 8.4  | TU11 isoform B                                                                       |
| 2866             | Q3TDI5           | 5                    | 11             | 29.8                  | 299    | 32723  | 4.3  | Peroxisome biogenesis factor 19, isoform CRA_e                                       |
| 2866             | Q8VC15           | 5                    | 11             | 29.8                  | 299    | 32733  | 4.3  | Peroxisomal biogenesis factor 19                                                     |
| 2867             | D3Z6J9           | 5                    | 29             | 29.1                  | 148    | 16682  | 11   | Uncharacterized protein                                                              |
| 2867             | UPI0000428882    | 5                    | 29             | 29.1                  | 148    | 16560  | 10.9 | PREDICTED: 60S ribosomal protein L27a                                                |
| 2867             | P14115           | 5                    | 29             | 29.1                  | 148    | 16605  | 11.1 | 60S ribosomal protein L27a                                                           |
| 2868             | Q8R0G2           | 5                    | 14             | 29                    | 231    | 25084  | 6.1  | Proteasome (Prosome, macropain) 26S subunit, non-ATPase, 10                          |
| 2868             | Q9Z2X2           | 5                    | 14             | 29                    | 231    | 25054  | 6.1  | 26S proteasome non-ATPase regulatory subunit 10                                      |
| 2869             | O88587           | 5                    | 23             | 26.8                  | 265    | 29496  | 5.8  | Catechol O-methyltransferase                                                         |
| 2869             | Q91XH4           | 5                    | 23             | 26.8                  | 265    | 29486  | 5.8  | Catechol-O-methyltransferase 1                                                       |
| 2870             | Q8C143           | 5                    | 13             | 26.6                  | 207    | 22749  | 5.5  | Myosin light chain 6B                                                                |
| 2871             | Q8C476           | 5                    | 7              | 26.4                  | 261    | 29438  | 6.5  | Uridine kinase                                                                       |
| 2871             | Q99PM9           | 5                    | 7              | 26.4                  | 261    | 29404  | 6.5  | Uridine-cytidine kinase 2                                                            |
| 2872             | D3Z7S0           | 5                    | 11             | 32.5                  | 197    | 21972  | 6.2  | Uncharacterized protein                                                              |
| 2872             | D3Z4J5           | 5                    | 11             | 26                    | 246    | 27580  | 7    | Uncharacterized protein                                                              |
| 2872             | Q9D1H7-2         | 5                    | 11             | 23.4                  | 274    | 30560  | 5    | Isoform 2 of Golgi to ER traffic protein 4 homolog                                   |
| 2872             | Q9D1H7           | 5                    | 11             | 19.6                  | 327    | 36525  | 5.4  | Golgi to ER traffic protein 4 homolog                                                |
| 2873             | Q64520           | 5                    | 7              | 28.8                  | 198    | 21918  | 6.5  | Guanylate kinase                                                                     |
| 2873             | Q564G0           | 5                    | 7              | 26                    | 219    | 24032  | 7.5  | Putative uncharacterized protein                                                     |
| 2874             | Q4FJY5           | 5                    | 7              | 25.8                  | 329    | 35594  | 8    | Ltb4dh protein                                                                       |
| 2875             | P41317           | 5                    | 13             | 25.4                  | 244    | 25957  | 5.1  | Mannose-binding protein C                                                            |
| 2876             | Q02105           | 5                    | 6              | 25.2                  | 246    | 25966  | 8.4  | Complement C1q subcomponent subunit C                                                |
| 2877             | Q60994           | 5                    | 11             | 24.7                  | 247    | 26841  | 5.6  | Adiponectin                                                                          |
| 2877             | Q6GTX4           | 5                    | 11             | 24.7                  | 247    | 26809  | 5.6  | 30 kDa adipocyte complement-related protein                                          |
| 2878             | Q62446           | 5                    | 23             | 22.3                  | 224    | 25148  | 9.3  | Peptidyl-prolyl cis-trans isomerase FKBP3                                            |
| 2879             | Q9CX86           | 5                    | 18             | 22                    | 305    | 30530  | 9.3  | Putative uncharacterized protein                                                     |
| 2880             | P55264           | 5                    | 10             | 21.6                  | 361    | 40149  | 6.2  | Adenosine kinase                                                                     |
| 2881             | O70209           | 5                    | 19             | 21.5                  | 316    | 34300  | 7.9  | PDZ and LIM domain protein 3                                                         |
| 2882             | Q3UPH1           | 5                    | 20             | 20.8                  | 443    | 46298  | 6    | Protein PRRC1                                                                        |
| 2883             | P31230           | 5                    | 26             | 20.6                  | 310    | 33997  | 8.4  | Aminoacyl tRNA synthase complex-interacting multifunctional protein 1                |
| 2883             | Q8C2U7           | 5                    | 26             | 20.1                  | 319    | 35197  | 8.6  | Putative uncharacterized protein                                                     |
| 2884             | Q3UDK3           | 5                    | 6              | 20.4                  | 339    | 38069  | 7.8  | Putative uncharacterized protein                                                     |
| 2884             | Q9D0F6           | 5                    | 6              | 20.4                  | 339    | 38096  | 7.8  | Replication factor C subunit 5                                                       |
| 2885             | Q35295           | 5                    | 10             | 19.8                  | 324    | 33901  | 5.4  | Transcriptional activator protein Pur-beta                                           |
| 2886             | P58044           | 5                    | 7              | 19.4                  | 227    | 26289  | 6.2  | Isopentenyl-diphosphate Delta-isomerase 1                                            |
| 2887             | Q8R010           | 5                    | 22             | 18.8                  | 320    | 35397  | 8.1  | Aminoacyl tRNA synthase complex-interacting multifunctional protein 2                |
| 2888             | O54724           | 5                    | 11             | 18.6                  | 392    | 43954  | 5.5  | Polymerase I and transcript release factor                                           |
| 2889             | Q3TN35           | 5                    | 7              | 18.5                  | 314    | 34194  | 5.1  | Small glutamine-rich tetratricopeptide repeat (TPR)-containing, alpha, isoform CRA_b |
| 2889             | Q8BJU0           | 5                    | 7              | 18.4                  | 315    | 34322  | 5.1  | Small glutamine-rich tetratricopeptide repeat-containing protein alpha               |
| 2890             | P10518           | 5                    | 6              | 18.2                  | 330    | 36024  | 6.8  | Delta-aminolevulinic acid dehydratase                                                |
| 2890             | Q9DD05           | 5                    | 6              | 18.2                  | 330    | 36040  | 6.8  | Delta-aminolevulinic acid dehydratase                                                |
| 2891             | Q8BWU5           | 5                    | 9              | 18.2                  | 335    | 36301  | 6.2  | Probable O-sialoglycoprotein endopeptidase                                           |
| 2892             | Q9D154           | 5                    | 6              | 17.4                  | 379    | 42575  | 6.2  | Leukocyte elastase inhibitor A                                                       |
| 2893             | Q3TMB3           | 5                    | 18             | 16.7                  | 353    | 40596  | 5.7  | Putative uncharacterized protein                                                     |
| 2893             | Q920E5           | 5                    | 18             | 16.7                  | 353    | 40582  | 5.7  | Farnesyl pyrophosphate synthase                                                      |
| 2893             | Q5M8R9           | 5                    | 18             | 16.7                  | 353    | 40565  | 5.7  | Farnesyl diphosphate synthetase                                                      |
| 2893             | Q3US29           | 5                    | 18             | 16.7                  | 353    | 40509  | 5.8  | Putative uncharacterized protein                                                     |
| 2894             | Q8R016           | 5                    | 7              | 16                    | 455    | 52511  | 6.5  | Bleomycin hydrolase                                                                  |
| 2895             | E9Q1Z0           | 5                    | 245            | 15.8                  | 538    | 58224  | 8.3  | Uncharacterized protein                                                              |
| 2895             | Q8BIS2           | 5                    | 245            | 15.8                  | 538    | 58266  | 8.3  | Putative uncharacterized protein                                                     |
| 2895             | Q148Q7           | 5                    | 245            | 15.8                  | 538    | 58240  | 8.3  | Putative uncharacterized protein                                                     |
| 2896             | P05202           | 5                    | 6              | 15.8                  | 430    | 47411  | 9    | Aspartate aminotransferase, mitochondrial                                            |
| 2897             | P35505           | 5                    | 6              | 15                    | 419    | 46104  | 7.4  | Fumarylacetoacetase                                                                  |
| 2898             | Q3UKJ0           | 5                    | 7              | 14.9                  | 850    | 97463  | 7.1  | Phosphorylase                                                                        |
| 2898             | Q9ET01           | 5                    | 7              | 14.9                  | 850    | 97431  | 7.1  | Glycogen phosphorylase, liver form                                                   |
| 2898             | Q91WV9           | 5                    | 7              | 14.9                  | 850    | 97431  | 7.1  | Phosphorylase                                                                        |
| 2899             | P51655           | 5                    | 7              | 14.2                  | 557    | 62586  | 6.3  | Glypican-4                                                                           |
| 2900             | O08749           | 5                    | 5              | 13.2                  | 509    | 54272  | 7.9  | Dihydropyridyl dehydrogenase, mitochondrial                                          |
| 2901             | P47738           | 5                    | 6              | 12.5                  | 519    | 56538  | 7.6  | Aldehyde dehydrogenase, mitochondrial                                                |
| 2901             | Q3UJW1           | 5                    | 6              | 12.5                  | 519    | 56526  | 7.6  | Putative uncharacterized protein                                                     |
| 2901             | Q3U9J7           | 5                    | 6              | 12.5                  | 519    | 56511  | 7.6  | Putative uncharacterized protein                                                     |
| 2901             | Q3U6I3           | 5                    | 6              | 12.5                  | 519    | 56554  | 7.6  | Putative uncharacterized protein                                                     |
| 2901             | Q3TVM2           | 5                    | 6              | 12.5                  | 519    | 56596  | 7.4  | Putative uncharacterized protein                                                     |
| 2902             | P24270           | 5                    | 6              | 12                    | 527    | 59765  | 7.9  | Catalase                                                                             |
| 2902             | Q91X12           | 5                    | 6              | 12                    | 527    | 59738  | 7.9  | Catalase                                                                             |
| 2902             | Q3TVZ1           | 5                    | 6              | 12                    | 527    | 59731  | 7.9  | Catalase                                                                             |
| 2903             | E9QPE7           | 5                    | 6              | 11.1                  | 1938   | 223355 | 5.5  | Uncharacterized protein                                                              |
| 2903             | Q8R384           | 5                    | 6              | 11                    | 1972   | 227147 | 5.5  | Myh11 protein                                                                        |
| 2903             | Q69ZK3           | 5                    | 6              | 10.9                  | 1984   | 228266 | 5.5  | MKIAA0866 protein (Fragment)                                                         |
| 2904             | A2A998           | 5                    | 9              | 11.4                  | 543    | 61008  | 6.1  | Complement component 8, alpha polypeptide                                            |
| 2904             | A2A997           | 5                    | 9              | 10.7                  | 580    | 65393  | 6.2  | Complement component 8, alpha polypeptide                                            |
| 2904             | Q8K182           | 5                    | 9              | 10.6                  | 587    | 66080  | 6.5  | Complement component C8 alpha chain                                                  |
| 2905             | Q8BT16           | 5                    | 5              | 9.3                   | 772    | 88818  | 5.8  | Digestive organ expansion factor homolog                                             |
| 2906             | Q3U506           | 5                    | 10             | 9.1                   | 503    | 57007  | 4.8  | Putative uncharacterized protein                                                     |
| 2907             | D3YUZ8           | 5                    | 10             | 8.7                   | 755    | 83951  | 5.9  | Uncharacterized protein                                                              |

Table S1. Proteins identified in the OVCAR-3 tumor supernatant by two or more unique peptides.

| Protein or Protein Group | Accession Number | Unique Peptide Count | Spectrum Count | Sequence Coverage (%) | Length | MolWt  | pI   | Descriptive Name                                                                                                   |
|--------------------------|------------------|----------------------|----------------|-----------------------|--------|--------|------|--------------------------------------------------------------------------------------------------------------------|
| 2907                     | E9Q2L4           | 5                    | 10             | 8.1                   | 810    | 90071  | 6.5  | Uncharacterized protein                                                                                            |
| 2907                     | UPI0001F78ACE    | 5                    | 10             | 7.7                   | 852    | 94973  | 6.5  | UPI0001F78ACE UniRef100 entry                                                                                      |
| 2907                     | UPI000058BDEF    | 5                    | 10             | 7.7                   | 852    | 94880  | 6.2  | disks large homolog 2                                                                                              |
| 2907                     | E9PW19           | 5                    | 10             | 7.7                   | 859    | 95531  | 6.3  | Uncharacterized protein                                                                                            |
| 2907                     | E9Q2L2           | 5                    | 10             | 7.6                   | 870    | 97432  | 6.5  | Uncharacterized protein                                                                                            |
| 2907                     | UPI0001F78ACC    | 5                    | 10             | 6.8                   | 976    | 109137 | 6.2  | UPI0001F78ACC UniRef100 entry                                                                                      |
| 2908                     | Q3U7R1           | 5                    | 9              | 7.1                   | 1092   | 121553 | 6    | Extended synaptotagmin-1                                                                                           |
| 2909                     | A2ATQ4           | 5                    | 7              | 4.9                   | 1944   | 215992 | 6.4  | Anaphase promoting complex subunit 1                                                                               |
| 2909                     | P53995           | 5                    | 7              | 4.9                   | 1944   | 216085 | 6.4  | Anaphase-promoting complex subunit 1                                                                               |
| 2909                     | B7ZNX2           | 5                    | 7              | 4.9                   | 1944   | 215991 | 6.4  | Anaphase promoting complex subunit 1                                                                               |
| 2910                     | UPI00004293D6    | 5                    | 5              | 4.1                   | 1563   | 173941 | 7.1  | tetratricopeptide repeat protein 37                                                                                |
| 2911                     | Q562L9           | 5                    | 112            | 84.5                  | 103    | 11556  | 6.5  | Actin-like protein (Fragment)                                                                                      |
| 2912                     | Q9BWJ5           | 5                    | 17             | 83.7                  | 86     | 10135  | 6.4  | Splicing factor 3B subunit 5                                                                                       |
| 2913                     | Q96033           | 5                    | 9              | 78.4                  | 88     | 9755   | 4.7  | Molybdopter synthase sulfur carrier subunit                                                                        |
| 2914                     | P06702           | 5                    | 33             | 67.5                  | 114    | 13242  | 6.1  | Protein S100-A9                                                                                                    |
| 2915                     | Q9Y244           | 5                    | 10             | 64.5                  | 141    | 15789  | 5.1  | Proteasome maturation protein                                                                                      |
| 2916                     | Q6LC01           | 5                    | 141            | 63.6                  | 437    | 48880  | 4.8  | MRNA encoding beta-tubulin, (from clone D-beta-1) (Fragment)                                                       |
| 2917                     | Q9POR6           | 5                    | 11             | 63.3                  | 139    | 15648  | 4.5  | GSK3-beta interaction protein                                                                                      |
| 2918                     | Q5EBL8           | 5                    | 17             | 62.9                  | 140    | 16131  | 7.2  | PDZ domain-containing protein 11                                                                                   |
| 2918                     | Q5EBL8-2         | 5                    | 17             | 51.5                  | 171    | 19492  | 7.6  | Isoform 2 of PDZ domain-containing protein 11                                                                      |
| 2919                     | P51161           | 5                    | 8              | 62.5                  | 128    | 14371  | 6.8  | Gastrotropin                                                                                                       |
| 2920                     | P78537           | 5                    | 12             | 62.4                  | 125    | 14311  | 8.2  | Biogenesis of lysosome-related organelles complex 1 subunit 1                                                      |
| 2921                     | Q96HQ2           | 5                    | 7              | 57.8                  | 116    | 13196  | 5    | CDKN2AIP N-terminal-like protein                                                                                   |
| 2922                     | P05114           | 5                    | 12             | 56                    | 100    | 10659  | 9.6  | Non-histone chromosomal protein HMG-14                                                                             |
| 2923                     | Q16864           | 5                    | 18             | 68.1                  | 119    | 13370  | 5.5  | V-type proton ATPase subunit F                                                                                     |
| 2923                     | C9J2K4           | 5                    | 18             | 55.1                  | 147    | 16402  | 5.1  | V-type proton ATPase subunit F                                                                                     |
| 2924                     | Q95059           | 5                    | 8              | 54                    | 124    | 13693  | 7.8  | Ribonuclease P protein subunit p14                                                                                 |
| 2925                     | P31151           | 5                    | 16             | 53.5                  | 101    | 11471  | 6.8  | Protein S100-A7                                                                                                    |
| 2926                     | P23297           | 5                    | 154            | 53.2                  | 94     | 10546  | 4.5  | Protein S100-A1                                                                                                    |
| 2927                     | Q9Y5L4           | 5                    | 9              | 52.6                  | 95     | 10500  | 8.2  | Mitochondrial import inner membrane translocase subunit Tim13                                                      |
| 2928                     | P07311           | 5                    | 15             | 51.5                  | 99     | 11261  | 9.3  | Acylphosphatase-1                                                                                                  |
| 2929                     | Q8IY31           | 5                    | 10             | 51.5                  | 132    | 15281  | 5.1  | Intraflagellar transport protein 20 log                                                                            |
| 2929                     | Q8IY31-2         | 5                    | 10             | 43                    | 158    | 18120  | 5.1  | Isoform 2 of Intraflagellar transport protein 20 log                                                               |
| 2930                     | O75607           | 5                    | 29             | 51.1                  | 178    | 19344  | 4.6  | Nucleoplasmin-3                                                                                                    |
| 2931                     | B4DJA5           | 5                    | 15             | 50.7                  | 201    | 22178  | 8.8  | cDNA FLJ51867, highly similar to Ras-related protein Rab-5A                                                        |
| 2931                     | P20339           | 5                    | 15             | 47.4                  | 215    | 23659  | 8.1  | Ras-related protein Rab-5A                                                                                         |
| 2932                     | Q9UJC5           | 5                    | 7              | 50.5                  | 107    | 12326  | 6.7  | SH3 domain-binding glutamic acid-rich-like protein 2                                                               |
| 2933                     | Q99471           | 5                    | 57             | 50                    | 154    | 17328  | 6.3  | Prefoldin subunit 5                                                                                                |
| 2934                     | Q9BT73           | 5                    | 15             | 50                    | 122    | 13104  | 7.9  | Proteasome assembly chaperone 3                                                                                    |
| 2935                     | Q86WQ0           | 5                    | 9              | 58.3                  | 139    | 15876  | 6.2  | Nuclear receptor 2C2-associated protein<br>cDNA FLJ60181, highly similar to sapiens TR4 orphan receptor            |
| 2935                     | B4DW92           | 5                    | 9              | 48.5                  | 167    | 19191  | 7.5  | associated protein TRA16, mRNA                                                                                     |
| 2936                     | Q6FIE5           | 5                    | 18             | 47.2                  | 125    | 13792  | 6.1  | PHP14 protein                                                                                                      |
| 2936                     | Q9NRX4           | 5                    | 18             | 47.2                  | 125    | 13833  | 6.1  | 14 kDa phosphohistidine phosphatase                                                                                |
| 2937                     | D6RDH4           | 5                    | 6              | 46.8                  | 141    | 16919  | 4.4  | Uncharacterized protein                                                                                            |
| 2937                     | Q9Y3D8           | 5                    | 6              | 38.4                  | 172    | 20061  | 4.6  | Adenylate kinase isoenzyme 6                                                                                       |
| 2938                     | P42771           | 5                    | 28             | 48.1                  | 156    | 16533  | 5.8  | Cyclin-dependent kinase inhibitor 2A, isoforms 1/2/3                                                               |
| 2938                     | A5X2G7           | 5                    | 28             | 44.9                  | 167    | 17883  | 6.9  | Cyclin-dependent kinase inhibitor                                                                                  |
| 2939                     | Q9NUG6           | 5                    | 12             | 44.4                  | 133    | 15511  | 6    | p53 and DNA damage-regulated protein 1                                                                             |
| 2940                     | Q3ZCW2           | 5                    | 17             | 43.6                  | 172    | 18986  | 5.4  | Galectin-related protein                                                                                           |
| 2941                     | Q9Y2Y0-2         | 5                    | 7              | 45.4                  | 152    | 17711  | 4.5  | Isoform 2 of ADP-ribosylation factor-like protein 2-binding protein                                                |
| 2941                     | Q9Y2Y0           | 5                    | 7              | 42.3                  | 163    | 18822  | 4.3  | ADP-ribosylation factor-like protein 2-binding protein                                                             |
| 2942                     | Q99584           | 5                    | 25             | 41.8                  | 98     | 11471  | 6.2  | Protein S100-A13                                                                                                   |
| 2943                     | Q9BRJ6           | 5                    | 13             | 41.8                  | 194    | 22083  | 9.6  | Uncharacterized protein C7orf50                                                                                    |
| 2944                     | UPI0001D3B90F    | 5                    | 11             | 41.5                  | 147    | 16236  | 8.8  | UPI0001D3B90F UniRef100 entry                                                                                      |
| 2945                     | Q502X2           | 5                    | 5              | 41.4                  | 186    | 21233  | 4.8  | Diablo log (Drosophila)                                                                                            |
| 2945                     | Q6W3F3           | 5                    | 5              | 39.5                  | 195    | 22284  | 5.9  | SMAC3                                                                                                              |
| 2945                     | Q9NR28           | 5                    | 5              | 32.2                  | 239    | 27131  | 5.9  | Diablo log, mitochondrial                                                                                          |
| 2945                     | Q53HB7           | 5                    | 5              | 32.2                  | 239    | 27068  | 6.4  | Diablo isoform 1 variant (Fragment)                                                                                |
| 2946                     | Q60888           | 5                    | 91             | 40.8                  | 179    | 19116  | 5.5  | Protein CutA                                                                                                       |
| 2946                     | Q60888-2         | 5                    | 91             | 36.9                  | 198    | 20925  | 5.5  | Isoform A of Protein CutA                                                                                          |
| 2947                     | O00422           | 5                    | 10             | 40.5                  | 153    | 17561  | 9.4  | Histone deacetylase complex subunit SAP18                                                                          |
| 2947                     | UPI000198CCAB    | 5                    | 10             | 38.8                  | 160    | 17807  | 9.6  | UPI000198CCAB UniRef100 entry                                                                                      |
| 2947                     | UPI000187B6C9    | 5                    | 10             | 36                    | 172    | 19526  | 9.8  | histone deacetylase complex subunit SAP18                                                                          |
| 2948                     | Q96AT1           | 5                    | 11             | 40.3                  | 154    | 17465  | 6.1  | Uncharacterized protein KIAA1143                                                                                   |
| 2949                     | Q9Y221           | 5                    | 12             | 40                    | 180    | 20463  | 8.5  | 60S ribosome subunit biogenesis protein NIP7 log                                                                   |
| 2950                     | E9PLL6           | 5                    | 42             | 39.8                  | 108    | 12201  | 11.5 | Uncharacterized protein                                                                                            |
| 2950                     | Q6NZ52           | 5                    | 42             | 29.1                  | 148    | 16478  | 11   | Ribosomal protein L27a                                                                                             |
| 2950                     | P46776           | 5                    | 42             | 29.1                  | 148    | 16561  | 11   | 60S ribosomal protein L27a<br>cDNA, FLJ94698, highly similar to sapiens trafficking protein                        |
| 2951                     | B2RA50           | 5                    | 10             | 39.3                  | 145    | 16858  | 9.1  | particle complex 1 (TRAPPC1),mRNA                                                                                  |
| 2951                     | Q9Y5R8           | 5                    | 10             | 39.3                  | 145    | 16832  | 9.2  | Trafficking protein particle complex subunit 1                                                                     |
| 2952                     | D3DSE6           | 5                    | 13             | 40.8                  | 245    | 27610  | 6.6  | Chromosome 21 open reading frame 59, isoform CRA_b                                                                 |
| 2952                     | C9J818           | 5                    | 13             | 38.8                  | 258    | 29400  | 6.9  | Uncharacterized protein                                                                                            |
| 2952                     | P57076           | 5                    | 13             | 34.5                  | 290    | 33224  | 7.5  | Uncharacterized protein C21orf59                                                                                   |
| 2953                     | Q96A00           | 5                    | 37             | 38.8                  | 147    | 16693  | 9.4  | Protein phosphatase 1 regulatory subunit 14A<br>cDNA, FLJ78909, highly similar to sapiens intersex-lik (IXL), mRNA |
| 2954                     | B7Z9P5           | 5                    | 15             | 61.2                  | 139    | 15002  | 6.3  | Mediator of RNA polymerase II transcription subunit 29                                                             |
| 2954                     | Q9NX70           | 5                    | 15             | 42.5                  | 200    | 21073  | 6.3  | Intersex-like (Drosophila)                                                                                         |
| 2954                     | B4DUA7           | 5                    | 15             | 38.5                  | 221    | 23473  | 8.2  | Intersex-like (Drosophila)                                                                                         |
| 2955                     | Q9BW83           | 5                    | 7              | 38.2                  | 186    | 20480  | 5.4  | Intraflagellar transport protein 27 log                                                                            |
| 2956                     | Q8N5L8           | 5                    | 8              | 38                    | 163    | 17631  | 10.3 | Alba-like protein C9orf23                                                                                          |
| 2957                     | Q9NZZ3           | 5                    | 17             | 37.4                  | 219    | 24571  | 4.8  | Charged multivesicular body protein 5                                                                              |
| 2958                     | Q8WW12           | 5                    | 38             | 37.1                  | 178    | 18925  | 7.5  | PEST proteolytic signal-containing nuclear protein                                                                 |
| 2959                     | Q9NVQ4           | 5                    | 10             | 36.9                  | 179    | 20215  | 5.8  | Fas apoptotic inhibitory molecule 1                                                                                |
| 2959                     | Q9NVQ4-2         | 5                    | 10             | 31                    | 213    | 24041  | 6    | Isoform 2 of Fas apoptotic inhibitory molecule 1                                                                   |
| 2960                     | B4E0Z3           | 5                    | 17             | 36.7                  | 150    | 16892  | 10.7 | cDNA FLJ52178, highly similar to Lamin-B receptor                                                                  |
| 2960                     | E7EVK9           | 5                    | 17             | 36.7                  | 150    | 16878  | 10.7 | Uncharacterized protein                                                                                            |
| 2960                     | C9JXK0           | 5                    | 17             | 25.8                  | 213    | 24284  | 9.9  | Uncharacterized protein                                                                                            |
| 2960                     | Q14739           | 5                    | 17             | 8.9                   | 615    | 70703  | 9.4  | Lamin-B receptor                                                                                                   |
| 2961                     | Q5JXB2           | 5                    | 27             | 36.6                  | 153    | 17377  | 5.9  | Putative ubiquitin-conjugating enzyme E2 N-like                                                                    |
| 2962                     | Q95848           | 5                    | 6              | 36.5                  | 222    | 24118  | 5.1  | Uridine diphosphate glucose pyrophosphatase                                                                        |
| 2963                     | UPI0001A51B8C    | 5                    | 7              | 42.1                  | 216    | 23566  | 9.9  | tRNA 2 <sup>m</sup> -phosphotransferase 1 isoform 4                                                                |
| 2963                     | Q86TN4           | 5                    | 7              | 36                    | 253    | 27742  | 10   | tRNA 2 <sup>m</sup> -phosphotransferase 1                                                                          |
| 2963                     | UPI0001A51B8D    | 5                    | 7              | 35.8                  | 254    | 27813  | 10   | tRNA 2 <sup>m</sup> -phosphotransferase 1 isoform 5                                                                |
| 2963                     | UPI0001A51B8B    | 5                    | 7              | 35.7                  | 255    | 27898  | 10   | tRNA 2 <sup>m</sup> -phosphotransferase 1 isoform 3                                                                |
| 2964                     | B5BU44           | 5                    | 12             | 35.7                  | 199    | 22731  | 6.8  | CASP2 and RIPK1 domain containing adaptor with death domain                                                        |
| 2964                     | Q8IY43           | 5                    | 12             | 35.7                  | 199    | 22732  | 6.5  | CRADD protein                                                                                                      |
| 2964                     | P78560           | 5                    | 12             | 35.7                  | 199    | 22745  | 6.8  | Death domain-containing protein CRADD                                                                              |
| 2965                     | P36507           | 5                    | 11             | 35.5                  | 400    | 44424  | 6.5  | Dual specificity mitogen-activated protein kinase kinase 2                                                         |
| 2966                     | D2KTB9           | 5                    | 18             | 35.4                  | 274    | 29071  | 5.6  | Copper chaperone for superoxide dismutase                                                                          |
| 2966                     | Q8NEV0           | 5                    | 18             | 35.4                  | 274    | 29027  | 5.6  | Superoxide dismutase copper chaperone                                                                              |
| 2966                     | O14618           | 5                    | 18             | 35.4                  | 274    | 29041  | 5.6  | Copper chaperone for superoxide dismutase                                                                          |



Table S1. Proteins identified in the OVCAR-3 tumor supernatant by two or more unique peptides.

| Protein or Protein Group | Accession Number | Unique Peptide Count | Spectrum Count | Sequence Coverage (%) | Length | MolWt | pI   | Descriptive Name                                                                                      |
|--------------------------|------------------|----------------------|----------------|-----------------------|--------|-------|------|-------------------------------------------------------------------------------------------------------|
| 2967                     | Q9BO61           | 5                    | 12             | 35.2                  | 176    | 18419 | 9.4  | Uncharacterized protein C19orf43                                                                      |
| 2968                     | Q9NQE9           | 5                    | 16             | 35.2                  | 182    | 20361 | 6.6  | Histidine triad nucleotide-binding protein 3                                                          |
| 2969                     | P08579           | 5                    | 22             | 35.1                  | 225    | 25486 | 9.7  | U2 small nuclear ribonucleoprotein B"                                                                 |
| 2970                     | Q16763           | 5                    | 9              | 35.1                  | 222    | 23845 | 8.4  | Ubiquitin-conjugating enzyme E2 S                                                                     |
| 2971                     | Q496C9           | 5                    | 17             | 34.9                  | 209    | 23484 | 8.3  | D-tyrosyl-tRNA(Tyr) deacylase                                                                         |
| 2971                     | Q8TEA8           | 5                    | 17             | 34.9                  | 209    | 23424 | 8.2  | D-tyrosyl-tRNA(Tyr) deacylase 1                                                                       |
| 2972                     | O14893           | 5                    | 7              | 34.6                  | 280    | 31585 | 5.6  | Survival of motor neuron protein-interacting protein 1                                                |
| 2973                     | E9PNK6           | 5                    | 13             | 33.7                  | 166    | 18661 | 5.8  | Uncharacterized protein                                                                               |
| 2973                     | UPI0000418D0B    | 5                    | 13             | 32                    | 175    | 19456 | 7.6  | tumor protein D53 isoform 2                                                                           |
| 2973                     | E9PPQ1           | 5                    | 13             | 29.3                  | 191    | 20987 | 5.3  | Uncharacterized protein                                                                               |
| 2973                     | UPI00015E0659    | 5                    | 13             | 27.5                  | 204    | 22476 | 5.6  | Tumor protein D53 (hD53) (Tumor protein D52-like 1).                                                  |
| 2973                     | Q16890           | 5                    | 13             | 27.5                  | 204    | 22449 | 5.6  | Tumor protein D53                                                                                     |
| 2973                     | UPI0001F7878D    | 5                    | 13             | 26.8                  | 209    | 23000 | 6    | Tumor protein D53 (hD53) (Tumor protein D52-like 1).                                                  |
| 2974                     | B4DEX5           | 5                    | 10             | 42.5                  | 170    | 18185 | 7.4  | Prion protein interacting protein, isoform CRA_d                                                      |
| 2974                     | B1AK96           | 5                    | 10             | 33.3                  | 204    | 22890 | 7.3  | Prion protein interacting protein (Fragment)                                                          |
| 2974                     | O43414-2         | 5                    | 10             | 30.6                  | 222    | 25009 | 6.5  | Isoform 2 of ER11 exoribonuclease 3                                                                   |
| 2974                     | C9JA75           | 5                    | 10             | 29.4                  | 231    | 26139 | 7    | Uncharacterized protein                                                                               |
| 2974                     | B4DN03           | 5                    | 10             | 26.3                  | 259    | 29152 | 8.3  | Prion protein interacting protein, isoform CRA_c                                                      |
| 2974                     | E9PDK8           | 5                    | 10             | 20.3                  | 335    | 37026 | 8.1  | Uncharacterized protein                                                                               |
| 2974                     | O43414           | 5                    | 10             | 20.2                  | 337    | 37238 | 8.1  | ER11 exoribonuclease 3                                                                                |
| 2975                     | P42766           | 5                    | 27             | 33.3                  | 123    | 14551 | 11   | 60S ribosomal protein L35                                                                             |
| 2976                     | Q86VX2-2         | 5                    | 8              | 32.2                  | 199    | 22412 | 5.9  | Isoform 2 of COMM domain-containing protein 7                                                         |
| 2976                     | Q86VX2           | 5                    | 8              | 32                    | 200    | 22540 | 5.9  | COMM domain-containing protein 7                                                                      |
| 2977                     | Q6WWJ7           | 5                    | 11             | 32.3                  | 189    | 21896 | 4.8  | DELTA3PRO-IL-18                                                                                       |
| 2977                     | B0YJ28           | 5                    | 11             | 31.6                  | 193    | 22307 | 4.8  | Interleukin-18                                                                                        |
| 2977                     | Q14116           | 5                    | 11             | 31.6                  | 193    | 22326 | 4.7  | Interleukin-18                                                                                        |
| 2978                     | Q14919           | 5                    | 19             | 32.7                  | 205    | 22350 | 5.2  | Dr1-associated corepressor                                                                            |
| 2978                     | Q14919-2         | 5                    | 19             | 31.8                  | 211    | 23148 | 5.3  | Isoform 2 of Dr1-associated corepressor                                                               |
| 2978                     | C9JCC6           | 5                    | 19             | 31.6                  | 212    | 23205 | 5.3  | Uncharacterized protein                                                                               |
| 2979                     | UPI000198C5F7    | 5                    | 8              | 41.8                  | 146    | 16825 | 6.7  | UPI000198C5F7 UniRef100 entry                                                                         |
| 2979                     | B7Z322           | 5                    | 8              | 30.8                  | 198    | 22093 | 5.2  | cDNA FLJ52146, highly similar to Grancalcin                                                           |
| 2979                     | E7EP31           | 5                    | 8              | 30.8                  | 198    | 22109 | 5.2  | Uncharacterized protein                                                                               |
| 2979                     | P28676           | 5                    | 8              | 28.1                  | 217    | 24010 | 5.2  | Grancalcin                                                                                            |
| 2980                     | Q08623           | 5                    | 20             | 33.3                  | 228    | 25249 | 5.3  | Pseudouridine-5'-monophosphatase                                                                      |
| 2980                     | E9PAV8           | 5                    | 20             | 30.3                  | 251    | 27573 | 5.5  | Uncharacterized protein                                                                               |
| 2981                     | P37108           | 5                    | 43             | 30.1                  | 136    | 14570 | 10   | Signal recognition particle 14 kDa protein                                                            |
| 2982                     | Q96PC3-4         | 5                    | 8              | 29.9                  | 154    | 18477 | 6.3  | Isoform 4 of AP-1 complex subunit sigma-3                                                             |
| 2983                     | Q14691           | 5                    | 6              | 28.6                  | 196    | 22988 | 7.4  | DNA replication complex GINS protein PSF1                                                             |
| 2984                     | O95983-2         | 5                    | 7              | 32                    | 259    | 29014 | 5.2  | Isoform 2 of Methyl-CpG-binding domain protein 3                                                      |
| 2984                     | O95983           | 5                    | 7              | 28.5                  | 291    | 32844 | 5.3  | Methyl-CpG-binding domain protein 3                                                                   |
| 2985                     | P53384-2         | 5                    | 7              | 28.8                  | 309    | 33412 | 5.2  | Isoform 2 of Cytosolic Fe-S cluster assembly factor NUBP1                                             |
| 2985                     | P53384           | 5                    | 7              | 27.8                  | 320    | 34535 | 5.3  | Cytosolic Fe-S cluster assembly factor NUBP1                                                          |
| 2986                     | Q53FE5           | 5                    | 10             | 27.8                  | 263    | 28343 | 8.4  | Putative uncharacterized protein (Fragment)                                                           |
| 2986                     | Q9NVZ3           | 5                    | 10             | 27.8                  | 263    | 28339 | 8.4  | Adaptin ear-binding coat-associated protein 2                                                         |
| 2986                     | Q9NVZ3-2         | 5                    | 10             | 26.7                  | 273    | 29464 | 8.4  | Isoform 2 of Adaptin ear-binding coat-associated protein 2                                            |
| 2987                     | Q9H299           | 5                    | 49             | 75.3                  | 93     | 10438 | 4.9  | SH3 domain-binding glutamic acid-rich-like protein 3                                                  |
| 2987                     | UPI0000D61E9C    | 5                    | 49             | 31.1                  | 225    | 23699 | 9.1  | SH3 domain-binding glutamic acid-rich-like protein 3 (SH3 domain-binding protein 1) (SH3BP-1).        |
| 2987                     | Q86Z22           | 5                    | 49             | 31                    | 226    | 23838 | 9.1  | Putative uncharacterized protein                                                                      |
| 2987                     | D3DPK5           | 5                    | 49             | 27.2                  | 257    | 26819 | 8.4  | SH3 domain binding glutamic acid-rich protein like 3, isoform CRA_a (Fragment)                        |
| 2988                     | Q9NRX1           | 5                    | 7              | 27                    | 252    | 27924 | 9.7  | RNA-binding protein PNO1                                                                              |
| 2989                     | B4DQNZ           | 5                    | 8              | 26.9                  | 208    | 23904 | 8.4  | cDNA FLJ52998                                                                                         |
| 2989                     | UPI0001C0B3BE    | 5                    | 8              | 26.9                  | 208    | 23937 | 8.4  | hypothetical protein LOC63932 isoform 3                                                               |
| 2989                     | Q9H5V9           | 5                    | 8              | 25.2                  | 222    | 25625 | 8.7  | UPF0428 protein CXorf56                                                                               |
| 2990                     | Q6ICL3-3         | 5                    | 6              | 27.1                  | 273    | 30345 | 5.1  | Isoform 3 of Uncharacterized protein C22orf25                                                         |
| 2990                     | A8K1E7           | 5                    | 6              | 26.8                  | 276    | 30903 | 5.2  | cDNA FLJ76702                                                                                         |
| 2990                     | Q6ICL3           | 5                    | 6              | 26.8                  | 276    | 30937 | 5.2  | Uncharacterized protein C22orf25                                                                      |
| 2990                     | C9JC99           | 5                    | 6              | 26.3                  | 281    | 31170 | 5    | Uncharacterized protein                                                                               |
| 2990                     | B7WNV6           | 5                    | 6              | 23.3                  | 317    | 34952 | 5.3  | Chromosome 22 open reading frame 25, isoform CRA_c                                                    |
| 2991                     | Q9UBV8           | 5                    | 7              | 26.8                  | 284    | 30381 | 6.5  | Peflin                                                                                                |
| 2992                     | B5MC20           | 5                    | 7              | 26.7                  | 217    | 24796 | 5    | Uncharacterized protein                                                                               |
| 2992                     | Q9NWJ5           | 5                    | 7              | 24.7                  | 235    | 26953 | 5    | cDNA FLJ20807 fis, clone ADSE01784                                                                    |
| 2992                     | E7EX06           | 5                    | 7              | 24.6                  | 236    | 26881 | 5.2  | Uncharacterized protein                                                                               |
| 2992                     | POC870           | 5                    | 7              | 18.4                  | 316    | 35932 | 5.4  | JmjC domain-containing protein 7                                                                      |
| 2993                     | B2R4V2           | 5                    | 20             | 26.4                  | 106    | 12527 | 10.7 | cDNA, FLJ92227, highly similar to sapiens ribosomal protein L36a-like (RPL36AL), mRNA                 |
| 2993                     | Q969Q0           | 5                    | 20             | 26.4                  | 106    | 12469 | 10.7 | 60S ribosomal protein L36a-like                                                                       |
| 2994                     | O60921           | 5                    | 6              | 25.7                  | 280    | 31691 | 6.8  | Checkpoint protein HUS1                                                                               |
| 2995                     | Q9ULC3           | 5                    | 6              | 25.7                  | 237    | 26659 | 6.6  | Ras-related protein Rab-23                                                                            |
| 2996                     | P09496-2         | 5                    | 19             | 25.2                  | 218    | 23662 | 4.5  | Isoform Non-brain of Clathrin light chain A                                                           |
| 2997                     | Q9H977           | 5                    | 6              | 24.6                  | 334    | 35891 | 6.2  | WD repeat-containing protein 54                                                                       |
| 2998                     | Q9NVM6           | 5                    | 11             | 24.3                  | 304    | 34687 | 8.5  | DnaJ log subfamily C member 17                                                                        |
| 2999                     | Q8TDN6           | 5                    | 6              | 23.8                  | 353    | 41401 | 9.9  | Ribosome biogenesis protein BRX1 log                                                                  |
| 3000                     | UPI00001AE7EF    | 5                    | 7              | 23.9                  | 243    | 26598 | 9    | Probable ribosome biogenesis protein NEP1 (Nucleolar protein EMG1 log) (Protein C2f).                 |
| 3000                     | Q92979           | 5                    | 7              | 23.8                  | 244    | 26720 | 9.2  | Ribosomal RNA small subunit methyltransferase NEP1                                                    |
| 3001                     | P40429           | 5                    | 10             | 23.6                  | 203    | 23577 | 10.9 | 60S ribosomal protein L13a                                                                            |
| 3001                     | Q5QTS3           | 5                    | 10             | 23.6                  | 203    | 23662 | 11   | FWP004                                                                                                |
| 3001                     | Q53H34           | 5                    | 10             | 23.6                  | 203    | 23558 | 10.9 | Ribosomal protein L13a variant (Fragment)                                                             |
| 3002                     | Q96AU5           | 5                    | 6              | 25.8                  | 353    | 40990 | 6.4  | Protein tyrosine phosphatase, non-receptor type 2                                                     |
| 3002                     | A8K3N4           | 5                    | 6              | 23.5                  | 387    | 45168 | 8.1  | Protein tyrosine phosphatase, non-receptor type 2, isoform CRA_b                                      |
| 3002                     | P17706           | 5                    | 6              | 21.9                  | 415    | 48473 | 8.3  | Tyrosine-protein phosphatase non-receptor type 2                                                      |
| 3003                     | Q8ND76-3         | 5                    | 20             | 27.5                  | 287    | 33245 | 7.7  | Isoform 3 of Cyclin-Y                                                                                 |
| 3003                     | Q8ND76-2         | 5                    | 20             | 25                    | 316    | 36504 | 7.6  | Isoform 2 of Cyclin-Y                                                                                 |
| 3003                     | B2RBH6           | 5                    | 20             | 23.2                  | 341    | 39254 | 7.2  | cDNA, FLJ95513, highly similar to sapiens cyclin fold protein 1 (CFP1), mRNA                          |
| 3003                     | Q8ND76           | 5                    | 20             | 23.2                  | 341    | 39337 | 7.2  | Cyclin-Y                                                                                              |
| 3004                     | B2R5I8           | 5                    | 5              | 23.1                  | 225    | 24956 | 6.7  | cDNA, FLJ92490, highly similar to sapiens RAB32, member RAS oncogene family (RAB32), mRNA             |
| 3004                     | Q13637           | 5                    | 5              | 23.1                  | 225    | 24997 | 6.5  | Ras-related protein Rab-32                                                                            |
| 3005                     | D6REQ6           | 5                    | 23             | 31.7                  | 218    | 25309 | 6.1  | Ribonuclease T2, isoform CRA_c                                                                        |
| 3005                     | O00584           | 5                    | 23             | 27                    | 256    | 29481 | 7.1  | Ribonuclease T2                                                                                       |
| 3005                     | A6XND5           | 5                    | 23             | 22.5                  | 307    | 35598 | 8.1  | Ribonuclease T2                                                                                       |
| 3006                     | B3KWK7           | 5                    | 5              | 28.4                  | 194    | 21844 | 9.4  | Insulin-like growth factor binding protein 3, isoform CRA_b                                           |
| 3006                     | B3KTQ0           | 5                    | 5              | 22.6                  | 243    | 26735 | 9.5  | cDNA FLJ38581 fis, clone HCHON2008672, highly similar to Insulin-like growth factor-binding protein 3 |
| 3006                     | B4DP07           | 5                    | 5              | 22.4                  | 246    | 27281 | 8.8  | cDNA FLJ53634, highly similar to Insulin-like growth factor-binding protein 3                         |
| 3006                     | A6XNC9           | 5                    | 5              | 22.2                  | 248    | 27273 | 9.3  | Insulin-like growth factor binding protein 3 isoform b                                                |
| 3006                     | A6XND1           | 5                    | 5              | 20.9                  | 263    | 28980 | 8.5  | Insulin-like growth factor binding protein 3 isoform b                                                |
| 3006                     | B3KVF9           | 5                    | 5              | 20.5                  | 268    | 29321 | 9    | cDNA FLJ16507 fis, clone HCHON2000364, highly similar to Insulin-like growth factor-binding protein 3 |

Table S1. Proteins identified in the OVCAR-3 tumor supernatant by two or more unique peptides.

| Protein or Protein Group | Accession Number | Unique Peptide Count | Spectrum Count | Sequence Coverage (%) | Length | MolWt | pI   | Descriptive Name                                                                                                                      |
|--------------------------|------------------|----------------------|----------------|-----------------------|--------|-------|------|---------------------------------------------------------------------------------------------------------------------------------------|
| 3006                     | A6XND0           | 5                    | 5              | 20.4                  | 270    | 29747 | 8.5  | Insulin-like growth factor binding protein 3<br>cDNA FLJ52568, highly similar to Insulin-like growth factor-binding protein 3         |
| 3006                     | B4DN53           | 5                    | 5              | 19.9                  | 276    | 30138 | 9    |                                                                                                                                       |
| 3006                     | P17936           | 5                    | 5              | 18.9                  | 291    | 31674 | 8.7  | Insulin-like growth factor-binding protein 3                                                                                          |
| 3007                     | Q95721           | 5                    | 7              | 22.1                  | 258    | 28970 | 5.8  | Synaptosomal-associated protein 29                                                                                                    |
| 3008                     | P18440           | 5                    | 10             | 22.1                  | 290    | 33899 | 6.5  | Arylamine N-acetyltransferase 1                                                                                                       |
| 3008                     | Q9HAQ5           | 5                    | 10             | 22.1                  | 290    | 33883 | 6.5  | Arylamine N-acetyltransferase 1                                                                                                       |
| 3008                     | UPI0000210A3F    | 5                    | 10             | 18.2                  | 352    | 40846 | 6.9  | arylamine N-acetyltransferase 1 isoform b                                                                                             |
| 3009                     | B4DIA9           | 5                    | 5              | 21.7                  | 341    | 37090 | 6.2  | cDNA FLJ61687, highly similar to sapiens UEV and lactate/malate dehydrogenase domains (UEVLD), transcript variant 1, mRNA             |
| 3009                     | E7EPQ7           | 5                    | 5              | 16.5                  | 449    | 49750 | 7.1  | Uncharacterized protein                                                                                                               |
| 3009                     | B4DL43           | 5                    | 5              | 16.5                  | 449    | 49664 | 7.3  | cDNA FLJ54696, highly similar to sapiens UEV and lactate/malate dehydrogenase domains (UEVLD), transcript variant 1, mRNA             |
| 3009                     | Q8IX04           | 5                    | 5              | 15.7                  | 471    | 52264 | 7.1  | Ubiquitin-conjugating enzyme E2 variant 3<br>L-aminoacidpate-semialdehyde dehydrogenase-phosphopantetheinyl transferase               |
| 3010                     | Q9N9N7           | 5                    | 8              | 21.7                  | 309    | 35776 | 6.8  | phosphopantetheinyl transferase                                                                                                       |
| 3011                     | Q0VDK3           | 5                    | 6              | 21.3                  | 367    | 41009 | 5.8  | AS3MT protein (Fragment)                                                                                                              |
| 3011                     | Q0VDK4           | 5                    | 6              | 21.3                  | 366    | 40908 | 6.1  | AS3MT protein (Fragment)                                                                                                              |
| 3011                     | Q9H8K9           | 5                    | 6              | 20.8                  | 375    | 41748 | 6.2  | Arsenite methyltransferase                                                                                                            |
| 3012                     | B3KTN5           | 5                    | 6              | 20.7                  | 450    | 50853 | 7.6  | like protein 2                                                                                                                        |
| 3012                     | Q9NS86           | 5                    | 6              | 20.7                  | 450    | 50854 | 7.4  | LanC-like protein 2                                                                                                                   |
| 3013                     | B4DDZ4           | 5                    | 5              | 20.4                  | 299    | 33614 | 5.9  | cDNA FLJ51794, highly similar to Annexin A4                                                                                           |
| 3013                     | Q6P452           | 5                    | 5              | 20.4                  | 299    | 33552 | 5.9  | ANXA4 protein                                                                                                                         |
| 3013                     | P09525           | 5                    | 5              | 19.1                  | 319    | 35883 | 6.1  | Annexin A4                                                                                                                            |
| 3014                     | Q15527           | 5                    | 8              | 20.3                  | 256    | 29648 | 9.2  | Surfeit locus protein 2                                                                                                               |
| 3015                     | E7EQ61           | 5                    | 11             | 19.9                  | 377    | 41851 | 5    | Uncharacterized protein                                                                                                               |
| 3015                     | Q9GZZ9           | 5                    | 11             | 18.6                  | 404    | 44863 | 4.8  | Ubiquitin-like modifier-activating enzyme 5                                                                                           |
| 3016                     | Q59GT8           | 5                    | 10             | 20.6                  | 320    | 35915 | 5.4  | Rab geranylgeranyltransferase, beta subunit variant (Fragment)                                                                        |
| 3016                     | P53611           | 5                    | 10             | 19.9                  | 331    | 36924 | 5    | Geranylgeranyl transferase type-2 subunit beta                                                                                        |
| 3017                     | Q5T6V5           | 5                    | 5              | 19.9                  | 341    | 39029 | 5.9  | UPF053 protein C9orf64                                                                                                                |
| 3018                     | Q8N9M1           | 5                    | 17             | 19.9                  | 422    | 44746 | 10.1 | Uncharacterized protein C19orf47                                                                                                      |
| 3019                     | Q9NWT6           | 5                    | 5              | 21.8                  | 349    | 40285 | 5.6  | Hypoxia-inducible factor 1-alpha inhibitor<br>cDNA FLJ60091, highly similar to Hypoxia-inducible factor 1 alpha inhibitor(1.14.11.16) |
| 3019                     | B4DI08           | 5                    | 5              | 19.8                  | 383    | 44275 | 6.2  |                                                                                                                                       |
| 3020                     | Q96M27           | 5                    | 21             | 20.7                  | 445    | 46701 | 5.8  | Protein PRRC1                                                                                                                         |
| 3020                     | Q96M27-3         | 5                    | 21             | 19.9                  | 462    | 48907 | 5.3  | Isoform 3 of Protein PRRC1                                                                                                            |
| 3020                     | C9J436           | 5                    | 21             | 19.8                  | 464    | 48467 | 5.5  | Uncharacterized protein                                                                                                               |
| 3020                     | Q96M27-2         | 5                    | 21             | 19.8                  | 464    | 48525 | 5.4  | Isoform 2 of Protein PRRC1                                                                                                            |
| 3021                     | Q96BN8           | 5                    | 6              | 19.3                  | 352    | 40263 | 5.5  | Protein FAM105B                                                                                                                       |
| 3022                     | P78318           | 5                    | 11             | 19.2                  | 339    | 39222 | 5.4  | Immunoglobulin-binding protein 1                                                                                                      |
| 3023                     | Q86W42           | 5                    | 5              | 19.1                  | 341    | 37535 | 7.4  | THO complex subunit 6 log                                                                                                             |
| 3024                     | Q8NFH4           | 5                    | 6              | 19                    | 326    | 36708 | 5.9  | Nucleoporin Nup37                                                                                                                     |
| 3025                     | Q6GMV2           | 5                    | 13             | 18.9                  | 418    | 47341 | 5    | SET and MYND domain-containing protein 5                                                                                              |
| 3026                     | B4DV96           | 5                    | 10             | 18.5                  | 286    | 30361 | 6.5  | cDNA FLJ60169, highly similar to Ribokinase (EC 2.7.1.15)                                                                             |
| 3026                     | Q9H477           | 5                    | 10             | 16.5                  | 322    | 34143 | 5    | Ribokinase                                                                                                                            |
| 3027                     | B3KTN4           | 5                    | 5              | 18.3                  | 421    | 47077 | 7.2  | Citrate synthase                                                                                                                      |
| 3027                     | B4DJV2           | 5                    | 5              | 17                    | 453    | 50432 | 7.9  | Citrate synthase                                                                                                                      |
| 3027                     | O75390           | 5                    | 5              | 16.5                  | 466    | 51712 | 8.3  | Citrate synthase, mitochondrial                                                                                                       |
| 3028                     | Q68D16           | 5                    | 5              | 18.8                  | 388    | 43487 | 8.2  | Putative uncharacterized protein DKFZp686D0638 (Fragment)                                                                             |
| 3028                     | A8MT37           | 5                    | 5              | 18.2                  | 401    | 44920 | 8.2  | Uncharacterized protein                                                                                                               |
| 3028                     | P49840           | 5                    | 5              | 15.1                  | 483    | 50981 | 8.7  | Glycogen synthase kinase-3 alpha                                                                                                      |
| 3029                     | Q96GK7           | 5                    | 6              | 18.2                  | 314    | 34596 | 8.2  | Fumarylacetoacetate hydrolase domain-containing protein 2A                                                                            |
| 3030                     | B3KUZ8           | 5                    | 6              | 18.1                  | 371    | 41326 | 8.8  | Aspartate aminotransferase                                                                                                            |
| 3030                     | E7ERW2           | 5                    | 6              | 17.3                  | 387    | 43030 | 9.3  | Aspartate aminotransferase                                                                                                            |
| 3030                     | B4DJA6           | 5                    | 6              | 17.3                  | 387    | 42987 | 9.3  | Aspartate aminotransferase                                                                                                            |
| 3030                     | P00505           | 5                    | 6              | 15.6                  | 430    | 47518 | 9    | Aspartate aminotransferase, mitochondrial                                                                                             |
| 3031                     | Q96BW5-2         | 5                    | 10             | 20.9                  | 302    | 33436 | 7    | Isoform 2 of Phosphotriesterase-related protein                                                                                       |
| 3031                     | Q96BW5           | 5                    | 10             | 18.1                  | 349    | 39018 | 6.5  | Phosphotriesterase-related protein                                                                                                    |
| 3032                     | Q147W7           | 5                    | 5              | 18                    | 345    | 37522 | 5.2  | KRT1B protein                                                                                                                         |
| 3033                     | Q7Z6M1           | 5                    | 5              | 17.7                  | 372    | 40565 | 6.3  | Rab9 effector protein with kelch motifs<br>cDNA FLJ75441, highly similar to sapiens vaccinia related kinase 1 (VRK1), mRNA            |
| 3034                     | A8K245           | 5                    | 12             | 17.4                  | 396    | 45446 | 8.9  |                                                                                                                                       |
| 3034                     | Q99986           | 5                    | 12             | 17.4                  | 396    | 45476 | 8.9  | Serine/threonine-protein kinase VRK1                                                                                                  |
| 3035                     | P15104           | 5                    | 6              | 17.4                  | 373    | 42064 | 6.9  | Glutamine synthetase                                                                                                                  |
| 3036                     | Q9GZT9-2         | 5                    | 8              | 18.3                  | 404    | 43666 | 8.5  | Isoform 2 of Egl nine log 1                                                                                                           |
| 3036                     | Q9GZT9           | 5                    | 8              | 17.4                  | 426    | 46021 | 8.5  | Egl nine log 1                                                                                                                        |
| 3037                     | Q7Z6K5           | 5                    | 5              | 30.1                  | 226    | 24943 | 5.8  | UPF052 protein C15orf38                                                                                                               |
| 3037                     | E2QRD5           | 5                    | 5              | 17.3                  | 394    | 43882 | 5.3  | Uncharacterized protein                                                                                                               |
| 3038                     | Q8IYS1           | 5                    | 5              | 17.2                  | 436    | 47776 | 5.8  | Peptidase M20 domain-containing protein 2                                                                                             |
| 3039                     | B4DW31           | 5                    | 14             | 17.1                  | 515    | 57958 | 5.1  | cDNA FLJ54186, highly similar to Nuclear receptor-binding protein                                                                     |
| 3039                     | Q9UHY1           | 5                    | 14             | 16.4                  | 535    | 59845 | 5.1  | Nuclear receptor-binding protein                                                                                                      |
| 3040                     | B4DEB2           | 5                    | 10             | 17                    | 400    | 43221 | 9.5  | cDNA FLJ56491, highly similar to DNA-repair protein XRCC1                                                                             |
| 3040                     | E9PEU6           | 5                    | 10             | 17                    | 401    | 43322 | 9.5  | Uncharacterized protein<br>DNA-repair protein XRCC1 (X-ray repair cross-complementing protein 1).                                     |
| 3040                     | UPI000013D351    | 5                    | 10             | 10.7                  | 633    | 69449 | 6.3  |                                                                                                                                       |
| 3040                     | P18887           | 5                    | 10             | 10.7                  | 633    | 69477 | 6.4  | DNA repair protein XRCC1                                                                                                              |
| 3040                     | Q59HH7           | 5                    | 10             | 10.5                  | 647    | 71014 | 6    | X-ray repair cross complementing protein 1 variant (Fragment)<br>cDNA FLJ55569, highly similar to sapiens secernin 3 (SCRN3), mRNA    |
| 3041                     | B4DI11           | 5                    | 9              | 17                    | 417    | 47670 | 6    |                                                                                                                                       |
| 3041                     | Q0VDG5           | 5                    | 9              | 16.7                  | 426    | 48840 | 5.6  | Secernin-3                                                                                                                            |
| 3041                     | Q0VDG4           | 5                    | 9              | 16.7                  | 424    | 48544 | 5.6  | Secernin-3                                                                                                                            |
| 3042                     | A8K7T8           | 5                    | 6              | 16.9                  | 360    | 40924 | 6.5  | cDNA FLJ77776, highly similar to sapiens hyaluronan and proteoglycan link protein 3 (HAPLN3), mRNA                                    |
| 3042                     | Q96S86           | 5                    | 6              | 16.9                  | 360    | 40894 | 6.5  | Hyaluronan and proteoglycan link protein 3<br>cDNA, FLJ96197, highly similar to sapiens connective tissue growth factor (CTGF), mRNA  |
| 3043                     | B2RCP7           | 5                    | 11             | 16.9                  | 349    | 38011 | 8    | Connective tissue growth factor                                                                                                       |
| 3043                     | Q5M8T4           | 5                    | 11             | 16.9                  | 349    | 38069 | 7.9  | Connective tissue growth factor                                                                                                       |
| 3044                     | Q86VN1-2         | 5                    | 7              | 19.2                  | 328    | 36958 | 7.5  | Isoform 2 of Vacuolar protein-sorting-associated protein 36                                                                           |
| 3044                     | Q86VN1           | 5                    | 7              | 16.3                  | 386    | 43817 | 7.2  | Vacuolar protein-sorting-associated protein 36                                                                                        |
| 3045                     | Q9Y259           | 5                    | 7              | 16.2                  | 395    | 45271 | 5.5  | Choline/ethanolamine kinase                                                                                                           |
| 3046                     | Q96FK6           | 5                    | 6              | 16                    | 387    | 43215 | 6.1  | WD repeat-containing protein 89<br>Brain-specific angiogenesis inhibitor 1-associated protein 2-like protein 1                        |
| 3047                     | Q9UHR4           | 5                    | 10             | 15.9                  | 511    | 56883 | 8.7  |                                                                                                                                       |
| 3048                     | P26022           | 5                    | 7              | 15.7                  | 381    | 41976 | 5    | Pentraxin-related protein PTX3                                                                                                        |
| 3049                     | E7EPY4           | 5                    | 7              | 15.4                  | 447    | 50520 | 6.4  | Uncharacterized protein                                                                                                               |
| 3049                     | Q9NUU7           | 5                    | 7              | 14.4                  | 478    | 53975 | 6.6  | ATP-dependent RNA helicase DDX19A<br>Isoform 2 of KH domain-containing, RNA-binding, signal transduction-associated protein 1         |
| 3050                     | Q07666-2         | 5                    | 32             | 16                    | 418    | 45861 | 7.6  |                                                                                                                                       |
| 3050                     | E7ET98           | 5                    | 32             | 15.8                  | 423    | 46429 | 8.8  | Uncharacterized protein                                                                                                               |

Table S1. Proteins identified in the OVCAR-3 tumor supernatant by two or more unique peptides.

| Protein or Protein Group | Accession Number | Unique Peptide Count | Spectrum Count | Sequence Coverage (%) | Length | MolWt | pI   | Descriptive Name                                                                                                              |
|--------------------------|------------------|----------------------|----------------|-----------------------|--------|-------|------|-------------------------------------------------------------------------------------------------------------------------------|
| 3050                     | B4DDX2           | 5                    | 32             | 15.8                  | 423    | 46459 | 8.8  | cDNA FLJ54590, highly similar to KH domain-containing, RNA-binding, signaltransduction-associated protein 1                   |
| 3050                     | B2R7B5           | 5                    | 32             | 15.1                  | 443    | 48225 | 8.7  | cDNA, FLJ93365, highly similar to sapiens KH domain containing, RNA binding, signal transduction associated 1 (KHDRBS1), mRNA |
| 3050                     | Q07666           | 5                    | 32             | 15.1                  | 443    | 48227 | 8.7  | KH domain-containing, RNA-binding, signal transduction-associated protein 1                                                   |
| 3051                     | Q7L5Y1-2         | 5                    | 7              | 19.7                  | 361    | 41024 | 6.5  | Isoform 2 of Mitochondrial enolase superfamily member 1                                                                       |
| 3051                     | Q7L5Y1           | 5                    | 7              | 16                    | 443    | 49787 | 6.5  | Mitochondrial enolase superfamily member 1                                                                                    |
| 3051                     | Q6ZS08           | 5                    | 7              | 15                    | 474    | 52468 | 5.2  | Enolase superfamily member 1 (Protein rTS)                                                                                    |
| 3052                     | B2R8N0           | 5                    | 9              | 14.9                  | 455    | 52935 | 7.3  | cDNA, FLJ93975, highly similar to sapiens epoxide hydrolase 1, microsomal (xenobiotic) (EPHX1), mRNA                          |
| 3052                     | Q6FGZ3           | 5                    | 9              | 14.9                  | 455    | 52961 | 7.3  | EPHX1 protein (Fragment)                                                                                                      |
| 3052                     | P07099           | 5                    | 9              | 14.9                  | 455    | 52949 | 7.3  | Epoxide hydrolase 1                                                                                                           |
| 3053                     | P57772           | 5                    | 7              | 14.9                  | 596    | 65305 | 8.4  | Selenocysteine-specific elongation factor                                                                                     |
| 3054                     | B4DJ85           | 5                    | 10             | 14.5                  | 580    | 66709 | 5.3  | cDNA FLJ60587, highly similar to Glomulin                                                                                     |
| 3054                     | Q92990           | 5                    | 10             | 14.1                  | 594    | 68208 | 5.3  | Glomulin                                                                                                                      |
| 3055                     | Q92466           | 5                    | 7              | 14.5                  | 427    | 47864 | 9.5  | DNA damage-binding protein 2                                                                                                  |
| 3056                     | B4E1W3           | 5                    | 7              | 14.4                  | 444    | 50080 | 6.8  | cDNA FLJ51732, highly similar to Peroxisomal NADH pyrophosphatase NUDT12 (EC 3.6.1.22)                                        |
| 3056                     | E7EM93           | 5                    | 7              | 14.4                  | 444    | 50052 | 6.8  | Uncharacterized protein                                                                                                       |
| 3056                     | Q9BQG2           | 5                    | 7              | 13.9                  | 462    | 52076 | 6.8  | Peroxisomal NADH pyrophosphatase NUDT12                                                                                       |
| 3057                     | B3KN55           | 5                    | 6              | 14.3                  | 474    | 53821 | 4.8  | cDNA FLJ13636 fis, clone PLACE1011160, highly similar to RING finger protein 14                                               |
| 3057                     | Q9UBS8           | 5                    | 6              | 14.3                  | 474    | 53837 | 4.8  | E3 ubiquitin-protein ligase RNF14                                                                                             |
| 3058                     | B3KPC1           | 5                    | 14             | 14.3                  | 385    | 43378 | 6.1  | cDNA FLJ31582 fis, clone NT2R12002117, highly similar to Protein pelota log                                                   |
| 3058                     | Q9BRX2           | 5                    | 14             | 14.3                  | 385    | 43359 | 6.3  | Protein pelota log                                                                                                            |
| 3059                     | Q9NYB0           | 5                    | 5              | 14.3                  | 399    | 44260 | 4.7  | Telomeric repeat-binding factor 2-interacting protein 1                                                                       |
| 3060                     | Q5T2T1           | 5                    | 7              | 14.1                  | 576    | 65524 | 7.1  | MAGUK p55 subfamily member 7                                                                                                  |
| 3061                     | Q6PJY9           | 5                    | 20             | 27.5                  | 247    | 24976 | 6.8  | SFRS11 protein (Fragment)                                                                                                     |
| 3061                     | Q6PKC9           | 5                    | 20             | 21.2                  | 321    | 34277 | 11.5 | SFRS11 protein (Fragment)                                                                                                     |
| 3061                     | Q6PJB9           | 5                    | 20             | 17.3                  | 394    | 42957 | 11.7 | SFRS11 protein (Fragment)                                                                                                     |
| 3061                     | Q8IW66           | 5                    | 20             | 14.1                  | 483    | 53414 | 10.5 | Splicing factor, arginine/serine-rich 11                                                                                      |
| 3061                     | Q05519           | 5                    | 20             | 14                    | 484    | 53542 | 10.5 | Serine/arginine-rich splicing factor 11                                                                                       |
| 3062                     | B4DUE0           | 5                    | 6              | 13.9                  | 411    | 45800 | 6.3  | cDNA FLJ58627                                                                                                                 |
| 3062                     | E7ES35           | 5                    | 6              | 13.9                  | 411    | 45881 | 6.2  | Uncharacterized protein                                                                                                       |
| 3062                     | Q5R3I4           | 5                    | 6              | 12.2                  | 469    | 52787 | 6    | Tetratricopeptide repeat protein 38                                                                                           |
| 3063                     | Q5JUA8           | 5                    | 5              | 13.9                  | 525    | 59347 | 7.5  | Vacuolar protein sorting 16 log (S. cerevisiae)                                                                               |
| 3063                     | Q9H269-2         | 5                    | 5              | 10.5                  | 695    | 78300 | 7.9  | Isoform 2 of Vacuolar protein sorting-associated protein 16 log                                                               |
| 3063                     | Q9H269           | 5                    | 5              | 8.7                   | 839    | 94694 | 6.8  | Vacuolar protein sorting-associated protein 16 log                                                                            |
| 3064                     | B3KRB2           | 5                    | 6              | 13.8                  | 661    | 75008 | 6.4  | cDNA FLJ33964 fis, clone CTONG2019029, highly similar to Pseudouridylyl synthase 7 log (EC 5.4.99.-)                          |
| 3064                     | Q96PZ0           | 5                    | 6              | 13.8                  | 661    | 75035 | 6.4  | Pseudouridylyl synthase 7 log                                                                                                 |
| 3064                     | B3KY42           | 5                    | 6              | 13.8                  | 661    | 75036 | 6.2  | cDNA FLJ46788 fis, clone TRACH3028855, highly similar to Pseudouridylyl synthase 7 log (EC 5.4.99.-)                          |
| 3065                     | Q9BTD8-4         | 5                    | 12             | 14.8                  | 446    | 47025 | 9.5  | Isoform 4 of RNA-binding protein 42                                                                                           |
| 3065                     | Q9BTD8-2         | 5                    | 12             | 14.7                  | 450    | 47322 | 9.5  | Isoform 2 of RNA-binding protein 42                                                                                           |
| 3065                     | Q9BTD8-3         | 5                    | 12             | 14.6                  | 451    | 47393 | 9.5  | Isoform 3 of RNA-binding protein 42                                                                                           |
| 3065                     | Q9BTD8           | 5                    | 12             | 13.8                  | 480    | 50414 | 9.6  | RNA-binding protein 42                                                                                                        |
| 3066                     | Q01415           | 5                    | 6              | 13.5                  | 458    | 50378 | 6.6  | N-acetylgalactosamine kinase                                                                                                  |
| 3067                     | Q13451           | 5                    | 5              | 13.3                  | 457    | 51212 | 5.9  | Peptidyl-prolyl cis-trans isomerase FKBP5                                                                                     |
| 3067                     | Q53GX4           | 5                    | 5              | 13.3                  | 457    | 51198 | 5.9  | FK506 binding protein 5 variant (Fragment)                                                                                    |
| 3067                     | Q2TA84           | 5                    | 5              | 13.3                  | 457    | 51178 | 5.9  | FK506 binding protein 5                                                                                                       |
| 3068                     | P01009-2         | 5                    | 7              | 15.3                  | 359    | 40263 | 5.5  | Isoform 2 of Alpha-1-antitrypsin                                                                                              |
| 3068                     | P01009           | 5                    | 7              | 13.2                  | 418    | 46737 | 5.6  | Alpha-1-antitrypsin                                                                                                           |
| 3069                     | Q14879           | 5                    | 6              | 12.9                  | 490    | 55985 | 5.2  | Interferon-induced protein with tetratricopeptide repeats 3                                                                   |
| 3070                     | Q86V87           | 5                    | 6              | 12.8                  | 743    | 82340 | 5.5  | Protein FAM160B2                                                                                                              |
| 3071                     | B7ZLW0           | 5                    | 10             | 12.7                  | 612    | 65774 | 7.4  | LPP protein                                                                                                                   |
| 3071                     | Q93052           | 5                    | 10             | 12.7                  | 612    | 65746 | 7.4  | Lipoma-preferred partner                                                                                                      |
| 3072                     | Q8TBX8           | 5                    | 11             | 12.6                  | 421    | 47300 | 6.8  | Phosphatidylinositol-5-phosphate 4-kinase type-2 gamma                                                                        |
| 3073                     | A8K9K6           | 5                    | 9              | 11.3                  | 594    | 65978 | 9.2  | cDNA FLJ76962, highly similar to sapiens nucleolar protein 5A (56kDa with KKE/D repeat) (NOL5A), mRNA                         |
| 3073                     | O00567           | 5                    | 9              | 11.3                  | 594    | 66050 | 9.2  | Nucleolar protein 5a                                                                                                          |
| 3074                     | B7Z7Y3           | 5                    | 5              | 11.2                  | 669    | 73744 | 6.9  | cDNA FLJ61618, highly similar to Discoidin, CUB and LCCL domain-containing protein 2                                          |
| 3074                     | Q96PD2           | 5                    | 5              | 9.7                   | 775    | 85035 | 7.2  | Discoidin, CUB and LCCL domain-containing protein 2                                                                           |
| 3074                     | Q96PD2-2         | 5                    | 5              | 9.5                   | 789    | 86657 | 7.2  | Isoform 2 of Discoidin, CUB and LCCL domain-containing protein 2                                                              |
| 3075                     | O43493-2         | 5                    | 6              | 12.4                  | 437    | 45880 | 5.6  | Isoform TGN46 of Trans-Golgi network integral membrane protein 2                                                              |
| 3075                     | O43493-5         | 5                    | 6              | 12.1                  | 447    | 47058 | 5.6  | Isoform 5 of Trans-Golgi network integral membrane protein 2                                                                  |
| 3075                     | UPI000020880A    | 5                    | 6              | 11.9                  | 453    | 47774 | 6    | UPI000020880A UniRef100 entry                                                                                                 |
| 3075                     | UPI0000208809    | 5                    | 6              | 11.9                  | 454    | 47880 | 5.8  | UPI0000208809 UniRef100 entry                                                                                                 |
| 3075                     | O43493-3         | 5                    | 6              | 11.9                  | 453    | 47698 | 6    | Isoform TGN48 of Trans-Golgi network integral membrane protein 2                                                              |
| 3075                     | O43493           | 5                    | 6              | 11.2                  | 480    | 51113 | 5.7  | Trans-Golgi network integral membrane protein 2                                                                               |
| 3076                     | P29350-2         | 5                    | 8              | 11.5                  | 556    | 63125 | 7.2  | Isoform 3 of Tyrosine-protein phosphatase non-receptor type 6                                                                 |
| 3076                     | B4DPS0           | 5                    | 8              | 11                    | 583    | 66228 | 7.2  | cDNA FLJ60320, highly similar to Tyrosine-protein phosphatase non-receptor type6 (EC 3.1.3.48)                                |
| 3076                     | Q53EL0           | 5                    | 8              | 10.8                  | 595    | 67609 | 7.8  | Protein tyrosine phosphatase, non-receptor type 6 isoform 1 variant (Fragment)                                                |
| 3076                     | P29350           | 5                    | 8              | 10.8                  | 595    | 67561 | 7.8  | Tyrosine-protein phosphatase non-receptor type 6                                                                              |
| 3076                     | UPI0001AE6A5B    | 5                    | 8              | 10.7                  | 597    | 67742 | 7.6  | UPI0001AE6A5B UniRef100 entry                                                                                                 |
| 3076                     | Q53XS4           | 5                    | 8              | 10.7                  | 597    | 67719 | 7.8  | Protein tyrosine phosphatase, non-receptor type 6                                                                             |
| 3076                     | UPI000014049A    | 5                    | 8              | 10.3                  | 624    | 70131 | 7.9  | tyrosine-protein phosphatase non-receptor type 6 isoform 3                                                                    |
| 3076                     | Q9UK67           | 5                    | 8              | 10.3                  | 624    | 70117 | 7.9  | 70 kDa SHP-1L protein                                                                                                         |
| 3076                     | C9JG49           | 5                    | 8              | 10.2                  | 626    | 70289 | 7.9  | Protein tyrosine phosphatase, non-receptor type 6, isoform CRA_b                                                              |
| 3077                     | B3KU23           | 5                    | 9              | 12.7                  | 607    | 69737 | 6.5  | cDNA FLJ39097 fis, clone NTONG2000977, highly similar to Neurolysin, mitochondrial (EC 3.4.24.16)                             |
| 3077                     | A8K9T8           | 5                    | 9              | 10.9                  | 704    | 80678 | 6.6  | cDNA FLJ76106, highly similar to sapiens neurolysin (metallopeptidase M3 family) (NLN), mRNA                                  |
| 3077                     | Q9BYT8           | 5                    | 9              | 10.9                  | 704    | 80652 | 6.6  | Neurolysin, mitochondrial                                                                                                     |
| 3078                     | Q8NFF5-2         | 5                    | 8              | 13.1                  | 490    | 54188 | 6.1  | Isoform 2 of FAD synthase                                                                                                     |
| 3078                     | Q8NFF5           | 5                    | 8              | 10.9                  | 587    | 65266 | 6.9  | FAD synthase                                                                                                                  |
| 3079                     | Q95831           | 5                    | 9              | 10.3                  | 613    | 66901 | 9    | Apoptosis-inducing factor 1, mitochondrial                                                                                    |
| 3079                     | Q95831-3         | 5                    | 9              | 10.3                  | 609    | 66295 | 8.9  | Isoform 3 of Apoptosis-inducing factor 1, mitochondrial                                                                       |
| 3080                     | Q5T2E6           | 5                    | 8              | 10.3                  | 689    | 78710 | 6.6  | UPF0668 protein C10orf76                                                                                                      |
| 3081                     | Q9UNF1           | 5                    | 6              | 10.2                  | 606    | 64954 | 9.3  | Melanoma-associated antigen D2                                                                                                |
| 3082                     | Q5R363           | 5                    | 7              | 12.1                  | 547    | 62033 | 5.7  | SFRS protein kinase 1                                                                                                         |
| 3082                     | B4DS61           | 5                    | 7              | 10.3                  | 639    | 72384 | 5.6  | SFRS protein kinase 1, isoform CRA_f                                                                                          |

Table S1. Proteins identified in the OVCAR-3 tumor supernatant by two or more unique peptides.

| Protein or Protein Group | Accession Number | Unique Peptide Count | Spectrum Count | Sequence Coverage (%) | Length | MolWt  | pI  | Descriptive Name                                                                                                                                                                                                         |
|--------------------------|------------------|----------------------|----------------|-----------------------|--------|--------|-----|--------------------------------------------------------------------------------------------------------------------------------------------------------------------------------------------------------------------------|
| 3082                     | A8K8B2           | 5                    | 7              | 10.1                  | 655    | 74282  | 6.1 | cDNA FLJ78127, highly similar to sapiens SFRS protein kinase 1 (SRPK1), mRNA                                                                                                                                             |
| 3082                     | Q96SB4           | 5                    | 7              | 10.1                  | 655    | 74325  | 6.2 | Serine/threonine-protein kinase SRPK1                                                                                                                                                                                    |
|                          |                  |                      |                |                       |        |        |     | Serine/threonine-protein kinase SRPK1 (EC 2.7.11.1)                                                                                                                                                                      |
| 3082                     | UPI0001D3B9F9    | 5                    | 7              | 9.8                   | 671    | 76040  | 6.3 | (Serine/arginine- rich protein-specific kinase 1) (SR-protein-specific kinase 1) (SFRS protein kinase 1).                                                                                                                |
| 3083                     | B4DEK5           | 5                    | 45             | 12.2                  | 452    | 50651  | 5   | cDNA FLJ54596, highly similar to Proactivator polypeptide                                                                                                                                                                |
|                          |                  |                      |                |                       |        |        |     | Prosaposin (Variant Gaucher disease and variant metachromatic leukodystrophy) variant (Fragment)                                                                                                                         |
| 3083                     | Q53FJ5           | 5                    | 45             | 10.5                  | 524    | 58141  | 5.2 | Isoform Sap-mu-6 of Proactivator polypeptide                                                                                                                                                                             |
| 3083                     | P07602-2         | 5                    | 45             | 10.5                  | 526    | 58356  | 5.1 | Proactivator polypeptide                                                                                                                                                                                                 |
| 3083                     | P07602           | 5                    | 45             | 10.5                  | 524    | 58113  | 5.2 | Uncharacterized protein                                                                                                                                                                                                  |
| 3083                     | C9JIZ6           | 5                    | 45             | 10.5                  | 526    | 58354  | 5.2 | Uncharacterized protein                                                                                                                                                                                                  |
| 3083                     | Q59EN5           | 5                    | 45             | 10.4                  | 530    | 58727  | 5.1 | Prosaposin variant (Fragment)                                                                                                                                                                                            |
| 3083                     | C9J7I6           | 5                    | 45             | 10.4                  | 527    | 58400  | 5.1 | Uncharacterized protein                                                                                                                                                                                                  |
| 3083                     | B1AVU8           | 5                    | 45             | 9.8                   | 559    | 61693  | 5.2 | Prosaposin                                                                                                                                                                                                               |
| 3084                     | E9PCV0           | 5                    | 8              | 12.3                  | 505    | 58345  | 7   | Uncharacterized protein                                                                                                                                                                                                  |
|                          |                  |                      |                |                       |        |        |     | cDNA FLJ53268, highly similar to Beta-glucuronidase (EC 3.2.1.31)                                                                                                                                                        |
| 3084                     | B4E1F6           | 5                    | 8              | 12.3                  | 505    | 58329  | 7   | Isoform Short of Beta-glucuronidase                                                                                                                                                                                      |
| 3084                     | P08236-2         | 5                    | 8              | 10.3                  | 600    | 69142  | 7   | cDNA, FLJ93161, highly similar to sapiens glucuronidase, beta (GUSB), mRNA                                                                                                                                               |
| 3084                     | B2R6X2           | 5                    | 8              | 9.5                   | 651    | 74706  | 7   | Beta-glucuronidase                                                                                                                                                                                                       |
| 3084                     | P08236           | 5                    | 8              | 9.5                   | 651    | 74732  | 7   | Nuclear fragile X mental retardation-interacting protein 2                                                                                                                                                               |
| 3085                     | Q7Z417           | 5                    | 9              | 9.4                   | 695    | 76121  | 8.7 | Isoform 2 of CCR4-NOT transcription complex subunit 3                                                                                                                                                                    |
| 3086                     | Q9Y5A7-2         | 5                    | 10             | 10.7                  | 609    | 64053  | 5.9 | cDNA FLJ61662, highly similar to CCR4-NOT transcription complex subunit 3                                                                                                                                                |
|                          |                  |                      |                |                       |        |        |     | complex subunit 3                                                                                                                                                                                                        |
| 3086                     | B7Z6J7           | 5                    | 10             | 9.1                   | 718    | 76569  | 6.4 | CCR4-NOT transcription complex subunit 3                                                                                                                                                                                 |
| 3086                     | Q75175           | 5                    | 10             | 8.6                   | 753    | 81872  | 6.2 | Zinc finger protein 185 variant 630                                                                                                                                                                                      |
| 3087                     | B8K2L9           | 5                    | 11             | 9                     | 630    | 67281  | 7   | Zinc finger protein 185 variant 660                                                                                                                                                                                      |
| 3087                     | B8K2M0           | 5                    | 11             | 8.6                   | 660    | 70380  | 7   | Isoform 3 of Zinc finger protein 185                                                                                                                                                                                     |
| 3087                     | O15231-3         | 5                    | 11             | 8.3                   | 690    | 73613  | 7   | Zinc finger protein 185                                                                                                                                                                                                  |
| 3087                     | O15231           | 5                    | 11             | 8.3                   | 689    | 73525  | 7   | zinc finger protein 185 isoform 2                                                                                                                                                                                        |
| 3087                     | UPI0001D27F7F    | 5                    | 11             | 8.2                   | 692    | 73711  | 7   | zinc finger protein 185 isoform 1                                                                                                                                                                                        |
| 3087                     | UPI0001D27F7E    | 5                    | 11             | 7.9                   | 721    | 76857  | 7   | Uncharacterized protein                                                                                                                                                                                                  |
| 3088                     | C9JEA8           | 5                    | 76             | 8.8                   | 419    | 46659  | 5.7 | Isoform 2 of NEDD8 ultimate buster 1                                                                                                                                                                                     |
| 3089                     | Q9Y5A7-2         | 5                    | 7              | 9                     | 601    | 69119  | 6   | NEDD8 ultimate buster 1                                                                                                                                                                                                  |
| 3089                     | Q9Y5A7           | 5                    | 7              | 8.8                   | 615    | 70538  | 6   | Isoform 2 of Receptor-interacting serine/threonine-protein kinase 1                                                                                                                                                      |
| 3090                     | Q13546-2         | 5                    | 7              | 9.3                   | 625    | 70733  | 6.2 | Receptor-interacting serine/threonine-protein kinase 1                                                                                                                                                                   |
| 3090                     | Q13546           | 5                    | 7              | 8.6                   | 671    | 75931  | 6.3 | Collagen alpha-1(VI) chain                                                                                                                                                                                               |
| 3091                     | P12109           | 5                    | 9              | 7.9                   | 1028   | 108529 | 5.4 | Serum albumin                                                                                                                                                                                                            |
| 3092                     | P02768           | 5                    | 79             | 7.7                   | 609    | 69367  | 6.3 | cDNA, FLJ95666, highly similar to sapiens albumin (ALB), mRNA                                                                                                                                                            |
| 3092                     | B2RBS8           | 5                    | 79             | 7.7                   | 609    | 69393  | 6.3 | cDNA FLJ78413, highly similar to sapiens albumin, mRNA                                                                                                                                                                   |
| 3092                     | A8K9P0           | 5                    | 79             | 7.7                   | 608    | 69268  | 6.3 | cDNA FLJ54371, highly similar to Serum albumin                                                                                                                                                                           |
| 3092                     | B4DPP6           | 5                    | 79             | 7.6                   | 618    | 70363  | 6.1 | Uncharacterized protein                                                                                                                                                                                                  |
| 3092                     | A6NBZ8           | 5                    | 79             | 7.5                   | 627    | 71705  | 6.7 | WAPAL protein                                                                                                                                                                                                            |
| 3093                     | B2RTX8           | 5                    | 6              | 7.3                   | 1184   | 132226 | 5.5 | Wings apart-like protein log                                                                                                                                                                                             |
| 3093                     | Q7Z5K2           | 5                    | 6              | 7.2                   | 1190   | 132945 | 5.4 | Uncharacterized protein                                                                                                                                                                                                  |
| 3093                     | E9PHI2           | 5                    | 6              | 7                     | 1228   | 137411 | 5.9 | Isoform 2 of Exocyst complex component 3                                                                                                                                                                                 |
| 3094                     | O60645-2         | 5                    | 8              | 8.6                   | 641    | 73797  | 7.1 | Exocyst complex component 3                                                                                                                                                                                              |
| 3094                     | O60645           | 5                    | 8              | 7.3                   | 756    | 86845  | 6.1 | cDNA FLJ53414, highly similar to Nuclear pore complex protein Nup98-Nup96precursor                                                                                                                                       |
| 3095                     | B4DWF8           | 5                    | 7              | 10.1                  | 666    | 70943  | 6.4 | Isoform 4 of Nuclear pore complex protein Nup98-Nup96                                                                                                                                                                    |
| 3095                     | P52948-4         | 5                    | 7              | 7.3                   | 920    | 96074  | 7.6 | cDNA FLJ77211, highly similar to sapiens nucleoporin 98kDa (NUP98), transcript variant 3, mRNA                                                                                                                           |
| 3095                     | A8KA17           | 5                    | 7              | 7.2                   | 937    | 97952  | 7.4 | Isoform 3 of Nuclear pore complex protein Nup98-Nup96                                                                                                                                                                    |
| 3095                     | P52948-3         | 5                    | 7              | 7.2                   | 937    | 97836  | 7.9 | Nuclear pore complex protein Nup98-Nup96 precursor [Contains: Nuclear pore complex protein Nup98 (Nucleoporin Nup98) (98 kDa nucleoporin); Nuclear pore complex protein Nup96 (Nucleoporin Nup96) (96 kDa nucleoporin)]. |
| 3095                     | UPI0001AE6BA5    | 5                    | 7              | 3.9                   | 1729   | 187666 | 6.4 | Isoform 6 of Nuclear pore complex protein Nup98-Nup96                                                                                                                                                                    |
| 3095                     | P52948-6         | 5                    | 7              | 3.9                   | 1714   | 186267 | 6.3 | Isoform 2 of Nuclear pore complex protein Nup98-Nup96                                                                                                                                                                    |
| 3095                     | P52948-2         | 5                    | 7              | 3.9                   | 1726   | 187198 | 6.5 | Isoform 5 of Nuclear pore complex protein Nup98-Nup96                                                                                                                                                                    |
| 3095                     | P52948-5         | 5                    | 7              | 3.7                   | 1800   | 195816 | 6.4 | Nuclear pore complex protein Nup98-Nup96                                                                                                                                                                                 |
| 3095                     | P52948           | 5                    | 7              | 3.7                   | 1817   | 197578 | 6.4 | Uncharacterized protein                                                                                                                                                                                                  |
| 3096                     | E9PBB0           | 5                    | 12             | 7.3                   | 1293   | 149486 | 5.5 | GRB10 interacting GYF protein 2                                                                                                                                                                                          |
| 3096                     | B9EG55           | 5                    | 12             | 7.2                   | 1298   | 149942 | 5.5 | PERQ amino acid-rich with GYF domain-containing protein 2                                                                                                                                                                |
| 3096                     | Q6Y7W6           | 5                    | 12             | 7.2                   | 1299   | 150070 | 5.5 | Isoform 2 of PERQ amino acid-rich with GYF domain-containing protein 2                                                                                                                                                   |
| 3096                     | Q6Y7W6-3         | 5                    | 12             | 7.1                   | 1321   | 152528 | 5.6 | Isoform 4 of Rab GTPase-activating protein 1-like                                                                                                                                                                        |
| 3097                     | Q5R372-4         | 5                    | 5              | 7.2                   | 800    | 90838  | 5.6 | Rab GTPase-activating protein 1-like                                                                                                                                                                                     |
| 3097                     | Q5R372           | 5                    | 5              | 7.1                   | 815    | 92513  | 5.3 | RAB GTPase activating protein 1-like isoform A                                                                                                                                                                           |
| 3097                     | UPI000179A973    | 5                    | 5              | 7.1                   | 815    | 92545  | 5.3 | Isoform 3 of Rab GTPase-activating protein 1-like                                                                                                                                                                        |
| 3097                     | Q5R372-3         | 5                    | 5              | 7                     | 827    | 94002  | 5.3 | cDNA FLJ61651, highly similar to Protein transport protein Sec24A                                                                                                                                                        |
| 3098                     | B4E205           | 5                    | 22             | 7                     | 857    | 96273  | 7.9 | Protein transport protein Sec24A                                                                                                                                                                                         |
| 3098                     | O95486           | 5                    | 22             | 5.5                   | 1093   | 119749 | 7.7 | cDNA FLJ41852 fis, clone NT2RI3004133, highly similar to Exportin-6                                                                                                                                                      |
| 3099                     | B3KW08           | 5                    | 13             | 6.8                   | 1111   | 127423 | 6.4 | Exportin-6                                                                                                                                                                                                               |
| 3099                     | Q96QU8           | 5                    | 13             | 6.8                   | 1125   | 128883 | 6.4 | XPO6 protein                                                                                                                                                                                                             |
| 3099                     | B7ZM10           | 5                    | 13             | 6.8                   | 1124   | 128789 | 6.3 | DNA topoisomerase 2 (Fragment)                                                                                                                                                                                           |
| 3100                     | Q71UH4           | 5                    | 7              | 6.9                   | 1598   | 180613 | 7.9 | DNA topoisomerase 2-beta                                                                                                                                                                                                 |
| 3100                     | Q02880           | 5                    | 7              | 6.8                   | 1626   | 183266 | 8   | Isoform Beta-1 of DNA topoisomerase 2-beta                                                                                                                                                                               |
| 3100                     | Q02880-2         | 5                    | 7              | 6.8                   | 1621   | 182661 | 8.1 | cDNA FLJ76790                                                                                                                                                                                                            |
| 3101                     | A8K4A1           | 5                    | 11             | 6.6                   | 963    | 108155 | 6.4 | Integrator complex subunit 4                                                                                                                                                                                             |
| 3101                     | Q96HW7           | 5                    | 11             | 6.6                   | 963    | 108171 | 6.4 | cDNA FLJ10528 fis, clone NT2RP2000943, highly similar to Protein transport protein Sec24D                                                                                                                                |
| 3102                     | B3KM89           | 5                    | 6              | 7.4                   | 906    | 100249 | 6.9 | cDNA FLJ78676, highly similar to sapiens SEC24 related gene family, member D (SEC24D), mRNA                                                                                                                              |
| 3102                     | A8K6V0           | 5                    | 6              | 6.5                   | 1032   | 112962 | 7.2 | Isoform 2 of Protein transport protein Sec24D                                                                                                                                                                            |
| 3102                     | Q94855-2         | 5                    | 6              | 6.5                   | 1033   | 113081 | 7.2 | Protein transport protein Sec24D                                                                                                                                                                                         |
| 3102                     | Q94855           | 5                    | 6              | 6.5                   | 1032   | 113010 | 7.2 | Isoform 4 of Cytospin-B                                                                                                                                                                                                  |
| 3103                     | Q5M775-4         | 5                    | 24             | 6.3                   | 987    | 110242 | 5.9 | cDNA FLJ53275, highly similar to sapiens spectrin domain with coiled-coils 1 (SPECC1), transcript variant, mRNA                                                                                                          |
| 3103                     | B4E2A4           | 5                    | 24             | 6.3                   | 987    | 110293 | 6   | Uncharacterized protein                                                                                                                                                                                                  |
| 3103                     | A8MV89           | 5                    | 24             | 6                     | 1029   | 114178 | 6.9 | Cytospin-B                                                                                                                                                                                                               |
| 3103                     | Q5M775           | 5                    | 24             | 5.8                   | 1068   | 118585 | 6.7 | Uncharacterized protein KIAA0528                                                                                                                                                                                         |
| 3104                     | Q86YS7           | 5                    | 6              | 5.9                   | 1000   | 110447 | 5.7 | Isoform 2 of Uncharacterized protein KIAA0528                                                                                                                                                                            |
| 3104                     | Q86YS7-2         | 5                    | 6              | 5.7                   | 1042   | 114994 | 6.1 | KIAA0528 protein                                                                                                                                                                                                         |
| 3104                     | B7ZLK2           | 5                    | 6              | 5.7                   | 1042   | 115022 | 6.1 | cDNA FLJ54447                                                                                                                                                                                                            |
| 3104                     | B4DRN7           | 5                    | 6              | 5.6                   | 1051   | 116027 | 5.9 | KIAA0528 protein                                                                                                                                                                                                         |
| 3104                     | B7ZLL0           | 5                    | 6              | 5.6                   | 1053   | 116339 | 6.4 | KIAA0528 protein                                                                                                                                                                                                         |
| 3104                     | B7ZLK1           | 5                    | 6              | 5.6                   | 1051   | 116055 | 5.9 | KIAA0528 protein                                                                                                                                                                                                         |

Table S1. Proteins identified in the OVCAR-3 tumor supernatant by two or more unique peptides.

| Protein or Protein Group | Accession Number | Unique Peptide Count | Spectrum Count | Sequence Coverage (%) | Length | MolWt  | pI   | Descriptive Name                                                                                                                                               |
|--------------------------|------------------|----------------------|----------------|-----------------------|--------|--------|------|----------------------------------------------------------------------------------------------------------------------------------------------------------------|
| 3105                     | Q96P48           | 5                    | 6              | 5.5                   | 1450   | 162191 | 6.2  | Arf-GAP with Rho-GAP domain, ANK repeat and PH domain-containing protein 1                                                                                     |
| 3106                     | Q96DB6           | 5                    | 6              | 19                    | 378    | 41809  | 9.1  | PDS5A protein (Fragment)                                                                                                                                       |
| 3106                     | UPI000179A8F6    | 5                    | 6              | 5.6                   | 1296   | 146528 | 7.9  | PDS5, regulator of cohesion maintenance, log A isoform 1                                                                                                       |
| 3106                     | Q29RF7           | 5                    | 6              | 5.4                   | 1337   | 150830 | 7.9  | Sister chromatid cohesion protein PDS5 log A                                                                                                                   |
| 3107                     | Q9NRY4           | 5                    | 5              | 5.4                   | 1513   | 172228 | 6.8  | Glucocorticoid receptor DNA-binding factor 1                                                                                                                   |
| 3107                     | Q9NRY4-2         | 5                    | 5              | 5.4                   | 1499   | 170513 | 6.6  | Isoform 2 of Glucocorticoid receptor DNA-binding factor 1                                                                                                      |
| 3108                     | E9PG28           | 5                    | 5              | 7.8                   | 1025   | 113273 | 5.7  | Uncharacterized protein                                                                                                                                        |
| 3108                     | UPI00015E0ADB    | 5                    | 5              | 5.7                   | 1401   | 152954 | 5.4  | Obscurin-like protein 1 precursor.                                                                                                                             |
| 3108                     | O75147-1         | 5                    | 5              | 5.7                   | 1401   | 152924 | 5.4  | Isoform 3 of Obscurin-like protein 1                                                                                                                           |
| 3108                     | A4KVA4           | 5                    | 5              | 5.2                   | 1544   | 168577 | 5.4  | Obscurin-like 1 isoform C                                                                                                                                      |
| 3108                     | UPI0001CB27C5    | 5                    | 5              | 5.2                   | 1543   | 168520 | 5.4  | obscurin-like protein 1 isoform 2 precursor                                                                                                                    |
| 3108                     | A6NN50           | 5                    | 5              | 4.4                   | 1804   | 197099 | 5.6  | Uncharacterized protein                                                                                                                                        |
| 3108                     | O75147           | 5                    | 5              | 4.2                   | 1896   | 206945 | 5.6  | Obscurin-like protein 1<br>cDNA FLJ39034 fis, clone NT2RP7008085, highly similar to                                                                            |
| 3109                     | B3KU09           | 5                    | 8              | 4.9                   | 1314   | 148460 | 6.7  | sapiens ring finger protein 123 (RNF123), mRNA                                                                                                                 |
| 3109                     | Q5XPI4-2         | 5                    | 8              | 4.9                   | 1316   | 148958 | 6.8  | Isoform 2 of E3 ubiquitin-protein ligase RNF123                                                                                                                |
| 3109                     | Q5XPI4           | 5                    | 8              | 4.9                   | 1314   | 148514 | 6.7  | E3 ubiquitin-protein ligase RNF123                                                                                                                             |
| 3110                     | Q6P158           | 5                    | 7              | 4.8                   | 1386   | 155604 | 7.7  | Putative ATP-dependent RNA helicase DHX57                                                                                                                      |
| 3111                     | B7Z897           | 5                    | 5              | 4.6                   | 1113   | 124015 | 6.2  | cDNA FLJ50429, highly similar to Hamartin                                                                                                                      |
| 3111                     | UPI0001A7BA83    | 5                    | 5              | 4.4                   | 1163   | 129695 | 6.5  | hamartin isoform 3                                                                                                                                             |
| 3111                     | Q92574           | 5                    | 5              | 4.4                   | 1164   | 129766 | 6.5  | Hamartin                                                                                                                                                       |
| 3112                     | Q9NS87           | 5                    | 7              | 4.6                   | 1388   | 160159 | 6    | Kinesin-like protein KIF15                                                                                                                                     |
| 3113                     | Q9Y4B6           | 5                    | 5              | 4.5                   | 1507   | 169007 | 5.1  | Protein VPRBP<br>Protein VPRBP (HIV-1 Vpr-binding protein) (VprBP) (Vpr-interacting protein) (DDB1- and CUL4-associated factor 1).                             |
| 3113                     | UPI0001AE75C2    | 5                    | 5              | 4.5                   | 1507   | 169000 | 5    | Isoform 2 of Protein VPRBP                                                                                                                                     |
| 3113                     | Q9Y4B6-2         | 5                    | 5              | 4.5                   | 1506   | 168936 | 5.1  | CDC42 binding protein kinase beta (DMPK-like)                                                                                                                  |
| 3114                     | A9JR72           | 5                    | 10             | 4.1                   | 1711   | 194286 | 6.4  | Serine/threonine-protein kinase MRCK beta                                                                                                                      |
| 3114                     | Q9Y5S2           | 5                    | 10             | 4.1                   | 1711   | 194314 | 6.4  | PCM1 protein                                                                                                                                                   |
| 3115                     | A2RUU9           | 5                    | 6              | 3.7                   | 1859   | 209905 | 5    | Uncharacterized protein                                                                                                                                        |
| 3115                     | E7EV56           | 5                    | 6              | 3.7                   | 1860   | 210131 | 5    | Isoform 2 of Pericentriolar material 1 protein                                                                                                                 |
| 3115                     | Q15154-2         | 5                    | 6              | 3.5                   | 1969   | 222220 | 5    | Uncharacterized protein                                                                                                                                        |
| 3115                     | A6NNN6           | 5                    | 6              | 3.5                   | 1969   | 222247 | 5    | Pericentriolar material 1 protein (PCM-1) (hPCM-1).                                                                                                            |
| 3115                     | UPI0000210A25    | 5                    | 6              | 3.4                   | 2024   | 228558 | 5    | Pericentriolar material 1 protein                                                                                                                              |
| 3115                     | Q15154           | 5                    | 6              | 3.4                   | 2024   | 228531 | 5    | Uncharacterized protein                                                                                                                                        |
| 3115                     | E7ETA6           | 5                    | 6              | 3.4                   | 2016   | 227729 | 5    | Pericentriolar material 1, isoform CRA_a                                                                                                                       |
| 3115                     | D3DSQ0           | 5                    | 6              | 3.4                   | 2024   | 228526 | 5    | PCM1 protein                                                                                                                                                   |
| 3115                     | B9EIS5           | 5                    | 6              | 3.4                   | 2016   | 227670 | 5    | Filaggrin-2                                                                                                                                                    |
| 3116                     | Q5D862           | 5                    | 5              | 3.1                   | 2391   | 248072 | 8.3  | Serine/threonine-protein kinase SMG1                                                                                                                           |
| 3117                     | Q96Q15           | 5                    | 9              | 1.8                   | 3661   | 410501 | 6.5  | Serine/threonine-protein kinase SMG1 (EC 2.7.11.1) (SMG-1) (hSMG-1) (Lambda/iota protein kinase C-interacting protein) (Lambda-interacting protein) (I6E3.4).  |
| 3117                     | UPI00015DFBDF    | 5                    | 9              | 1.8                   | 3662   | 410630 | 6.5  | Ribosomal protein L37a, isoform CRA_c                                                                                                                          |
| 3118                     | C9J4Z3           | 4                    | 118            | 69.1                  | 68     | 7624   | 10   | Rpl37a protein                                                                                                                                                 |
| 3118                     | Q5M9N6           | 4                    | 118            | 57.3                  | 82     | 8995   | 10.4 | 60S ribosomal protein L37a 60S ribosomal protein L37a                                                                                                          |
| 3118                     | P61513           | 4                    | 118            | 51.1                  | 92     | 10275  | 10.4 | Dynein light chain 1, cytoplasmic Dynein light chain 1, cytoplasmic Ubiquitin-conjugating enzyme E2 A Ubiquitin-conjugating enzyme E2 A                        |
| 3119                     | P63167           | 4                    | 88             | 67.4                  | 89     | 10366  | 7.4  | Ubiquitin carrier protein (Fragment) Ubiquitin carrier protein Ubiquitin carrier protein Ubiquitin-conjugating enzyme E2 G2 Ubiquitin-conjugating enzyme E2 G2 |
| 3120                     | P49459           | 4                    | 22             | 56.6                  | 152    | 17315  | 5.1  | Uncharacterized protein                                                                                                                                        |
| 3120                     | Q53G67           | 4                    | 22             | 56.6                  | 152    | 17287  | 5.1  | Uncharacterized protein                                                                                                                                        |
| 3121                     | A6NMQ7           | 4                    | 30             | 51.1                  | 137    | 15614  | 4.6  | Uncharacterized protein                                                                                                                                        |
| 3121                     | P60604           | 4                    | 30             | 42.4                  | 165    | 18566  | 4.7  | Uncharacterized protein                                                                                                                                        |
| 3121                     | E9QMQ4           | 4                    | 30             | 23.3                  | 301    | 32793  | 4.9  | Uncharacterized protein                                                                                                                                        |
| 3121                     | Q3UWG7           | 4                    | 30             | 23.1                  | 303    | 32990  | 4.9  | Uncharacterized protein                                                                                                                                        |
| 3122                     | P35268           | 4                    | 105            | 50.8                  | 128    | 14787  | 9.2  | Uncharacterized protein                                                                                                                                        |
| 3122                     | Q7Z4W8           | 4                    | 105            | 50.8                  | 128    | 14818  | 9.3  | Uncharacterized protein                                                                                                                                        |
| 3122                     | P67984           | 4                    | 105            | 50.8                  | 128    | 14759  | 9.2  | Uncharacterized protein                                                                                                                                        |
| 3123                     | Q9DAM7           | 4                    | 6              | 49.6                  | 115    | 11549  | 9.3  | Uncharacterized protein                                                                                                                                        |
| 3123                     | Q8WUH6           | 4                    | 6              | 49.1                  | 116    | 11748  | 9.3  | Uncharacterized protein                                                                                                                                        |
| 3124                     | Q15116           | 4                    | 11             | 42.1                  | 133    | 15179  | 5.2  | Uncharacterized protein                                                                                                                                        |
| 3124                     | Q8VC85           | 4                    | 11             | 42.1                  | 133    | 15236  | 5.4  | Uncharacterized protein                                                                                                                                        |
| 3125                     | Q7RTV0           | 4                    | 8              | 40                    | 110    | 12405  | 8.4  | Uncharacterized protein                                                                                                                                        |
| 3126                     | P42677           | 4                    | 86             | 39.3                  | 84     | 9461   | 9.5  | Uncharacterized protein                                                                                                                                        |
| 3127                     | P63272           | 4                    | 52             | 38.5                  | 117    | 13193  | 8.1  | Uncharacterized protein                                                                                                                                        |
| 3127                     | Q9Z199           | 4                    | 52             | 38.5                  | 117    | 13194  | 8.1  | Uncharacterized protein                                                                                                                                        |
| 3128                     | E9PI02           | 4                    | 5              | 38.1                  | 139    | 16147  | 9.6  | Uncharacterized protein                                                                                                                                        |
| 3128                     | E9PMQ6           | 4                    | 5              | 12.3                  | 430    | 46537  | 6.8  | Uncharacterized protein                                                                                                                                        |
| 3128                     | Q5L252           | 4                    | 5              | 11.1                  | 477    | 51704  | 6.6  | Uncharacterized protein                                                                                                                                        |
| 3128                     | Q00613-2         | 4                    | 5              | 10.8                  | 489    | 52881  | 6.1  | Uncharacterized protein                                                                                                                                        |
| 3128                     | P38532-2         | 4                    | 5              | 10.5                  | 503    | 54931  | 5.5  | Uncharacterized protein                                                                                                                                        |
| 3128                     | P38532           | 4                    | 5              | 10.1                  | 525    | 57224  | 5.3  | Uncharacterized protein                                                                                                                                        |
| 3128                     | Q53HT3           | 4                    | 5              | 10                    | 529    | 57228  | 5.2  | Uncharacterized protein                                                                                                                                        |
| 3128                     | Q00613           | 4                    | 5              | 10                    | 529    | 57261  | 5.2  | Uncharacterized protein                                                                                                                                        |
| 3129                     | P62879           | 4                    | 16             | 37.4                  | 340    | 37331  | 6    | Uncharacterized protein                                                                                                                                        |
| 3130                     | Q3MHD2           | 4                    | 18             | 36.4                  | 195    | 21701  | 7.8  | Uncharacterized protein                                                                                                                                        |
| 3130                     | Q3MHD2-2         | 4                    | 18             | 35.9                  | 198    | 21999  | 6.9  | Uncharacterized protein                                                                                                                                        |
| 3131                     | Q8WVJ2           | 4                    | 19             | 35.7                  | 157    | 17676  | 5.1  | Uncharacterized protein                                                                                                                                        |
| 3131                     | Q9CQ48           | 4                    | 19             | 35.7                  | 157    | 17660  | 5.1  | Uncharacterized protein                                                                                                                                        |
| 3132                     | Q3UZ15           | 4                    | 7              | 36.5                  | 156    | 17414  | 9.6  | Uncharacterized protein                                                                                                                                        |
| 3132                     | C9JR52           | 4                    | 7              | 34.3                  | 166    | 18877  | 9.7  | Uncharacterized protein                                                                                                                                        |
| 3132                     | P63089           | 4                    | 7              | 33.9                  | 168    | 18869  | 9.6  | Uncharacterized protein                                                                                                                                        |
| 3132                     | P21246           | 4                    | 7              | 33.9                  | 168    | 18942  | 9.6  | Uncharacterized protein                                                                                                                                        |
| 3133                     | Q5JQ44           | 4                    | 10             | 30.9                  | 181    | 20294  | 4.8  | Uncharacterized protein                                                                                                                                        |
| 3133                     | P61225           | 4                    | 10             | 30.6                  | 183    | 20504  | 4.8  | Uncharacterized protein                                                                                                                                        |
| 3134                     | Q5PR09           | 4                    | 27             | 33.3                  | 135    | 15874  | 11.4 | Uncharacterized protein                                                                                                                                        |
| 3134                     | P62910           | 4                    | 27             | 33.3                  | 135    | 15860  | 11.3 | Uncharacterized protein                                                                                                                                        |
| 3134                     | C9JBL2           | 4                    | 27             | 29.4                  | 153    | 17962  | 10.6 | Uncharacterized protein                                                                                                                                        |
| 3135                     | B4DP27           | 4                    | 8              | 29                    | 169    | 19259  | 5.9  | Uncharacterized protein                                                                                                                                        |
| 3135                     | E7ESD4           | 4                    | 8              | 29                    | 169    | 19239  | 6.4  | Uncharacterized protein                                                                                                                                        |
| 3135                     | UPI00015AA329    | 4                    | 8              | 27.8                  | 176    | 20027  | 9.1  | Uncharacterized protein                                                                                                                                        |
| 3135                     | P49020           | 4                    | 8              | 25                    | 196    | 22189  | 5.2  | Uncharacterized protein                                                                                                                                        |
| 3135                     | Q9ROQ3           | 4                    | 8              | 24.4                  | 201    | 22705  | 5.2  | Uncharacterized protein                                                                                                                                        |
| 3135                     | Q15363           | 4                    | 8              | 24.4                  | 201    | 22761  | 5.2  | Uncharacterized protein                                                                                                                                        |
| 3136                     | A8MSV4           | 4                    | 4              | 28.7                  | 174    | 19671  | 5.4  | Uncharacterized protein                                                                                                                                        |
| 3136                     | Q969Q5           | 4                    | 4              | 24.6                  | 203    | 23124  | 6.2  | Uncharacterized protein                                                                                                                                        |
| 3136                     | Q8K133           | 4                    | 4              | 24.6                  | 203    | 23118  | 6.4  | Uncharacterized protein                                                                                                                                        |
| 3136                     | P35290           | 4                    | 4              | 24.6                  | 203    | 23144  | 6.2  | Uncharacterized protein                                                                                                                                        |

Table S1. Proteins identified in the OVCAR-3 tumor supernatant by two or more unique peptides.

| Protein or Protein Group | Accession Number | Unique Peptide Count | Spectrum Count | Sequence Coverage (%) | Length | MolWt | pI   | Descriptive Name                                                                                                                                                                                    |
|--------------------------|------------------|----------------------|----------------|-----------------------|--------|-------|------|-----------------------------------------------------------------------------------------------------------------------------------------------------------------------------------------------------|
| 3137                     | Q96H20           | 4                    | 9              | 28.7                  | 258    | 28864 | 6.7  | Vacuolar-sorting protein SNF8                                                                                                                                                                       |
| 3137                     | Q9CZ28           | 4                    | 9              | 28.7                  | 258    | 28886 | 6.7  | Vacuolar-sorting protein SNF8                                                                                                                                                                       |
| 3138                     | UPI0000605FCF    | 4                    | 9              | 28.1                  | 128    | 14140 | 8.5  | PREDICTED: NHP2-like protein 1-like                                                                                                                                                                 |
| 3138                     | P55769           | 4                    | 9              | 28.1                  | 128    | 14174 | 8.5  | NHP2-like protein 1 NHP2-like protein 1                                                                                                                                                             |
| 3138                     | E9PWL3           | 4                    | 9              | 28.1                  | 128    | 14186 | 8.5  | Uncharacterized protein                                                                                                                                                                             |
| 3138                     | B1AHD1           | 4                    | 9              | 27.3                  | 132    | 14627 | 8.5  | NHP2 non-histone chromosome protein 2-like 1 ( <i>S. cerevisiae</i> )                                                                                                                               |
| 3139                     | D3Z6H3           | 4                    | 10             | 27                    | 185    | 20041 | 6.4  | Dynactin 6, isoform CRA_b                                                                                                                                                                           |
| 3139                     | Q9WUB4           | 4                    | 10             | 26.3                  | 190    | 20670 | 6.7  | Dynactin subunit 6                                                                                                                                                                                  |
| 3139                     | O00399           | 4                    | 10             | 26.3                  | 190    | 20747 | 6.3  | Dynactin subunit 6                                                                                                                                                                                  |
| 3140                     | Q9H1R6           | 4                    | 19             | 33                    | 188    | 21029 | 4.7  | BCL2-like 1 (Fragment)                                                                                                                                                                              |
| 3140                     | Q5TE64           | 4                    | 19             | 30.2                  | 205    | 22896 | 4.7  | BCL2-like 1 (Fragment)                                                                                                                                                                              |
| 3140                     | Q64373-3         | 4                    | 19             | 29.7                  | 209    | 23357 | 4.8  | Isoform Bcl-X(beta) of Bcl-2-like protein 1                                                                                                                                                         |
| 3140                     | Q64373-4         | 4                    | 19             | 29                    | 214    | 23900 | 4.7  | Isoform Bcl-X(delta-TM) of Bcl-2-like protein 1                                                                                                                                                     |
| 3140                     | Q07817-3         | 4                    | 19             | 27.3                  | 227    | 25290 | 4.8  | Isoform Bcl-X(beta) of Bcl-2-like protein 1                                                                                                                                                         |
| 3140                     | Q64373           | 4                    | 19             | 26.6                  | 233    | 26132 | 4.9  | Bcl-2-like protein 1                                                                                                                                                                                |
| 3140                     | Q07817           | 4                    | 19             | 26.6                  | 233    | 26049 | 4.9  | Bcl-2-like protein 1                                                                                                                                                                                |
| 3140                     | Q35843           | 4                    | 19             | 26.4                  | 235    | 26122 | 4.7  | Bcl-x-gamma                                                                                                                                                                                         |
| 3141                     | P33947           | 4                    | 11             | 25.9                  | 212    | 24422 | 8.7  | ER lumen protein retaining receptor 2                                                                                                                                                               |
| 3141                     | Q9CQM2           | 4                    | 11             | 25.9                  | 212    | 24454 | 8.7  | ER lumen protein retaining receptor 2                                                                                                                                                               |
| 3142                     | Q9BSB4           | 4                    | 6              | 25.7                  | 218    | 25003 | 6.1  | Autophagy-related protein 101                                                                                                                                                                       |
| 3142                     | Q9D8Z6           | 4                    | 6              | 25.7                  | 218    | 25002 | 6.1  | Autophagy-related protein 101                                                                                                                                                                       |
| 3143                     | P83881           | 4                    | 11             | 24.5                  | 106    | 12441 | 10.6 | 60S ribosomal protein L36a 60S ribosomal protein L36a                                                                                                                                               |
| 3143                     | B2REA7           | 4                    | 11             | 23.2                  | 112    | 13228 | 10.5 | Ribosomal protein L36a                                                                                                                                                                              |
| 3143                     | C9JBJ2           | 4                    | 11             | 22                    | 118    | 13792 | 10.5 | Uncharacterized protein                                                                                                                                                                             |
| 3143                     | UPI0001F169B7    | 4                    | 11             | 18.3                  | 142    | 16378 | 10.4 | 60S ribosomal protein L36a isoform a                                                                                                                                                                |
| 3144                     | Q17S11           | 4                    | 12             | 21.8                  | 376    | 43158 | 5.7  | SWI/SNF related, matrix associated, actin dependent regulator of chromatin, subfamily b, member 1 SWI/SNF related, matrix associated, actin dependent regulator of chromatin, subfamily b, member 1 |
| 3144                     | Q12824           | 4                    | 12             | 21.3                  | 385    | 44141 | 6.2  | SWI/SNF-related matrix-associated actin-dependent regulator of chromatin subfamily B member 1 SWI/SNF-related matrix-associated actin-dependent regulator of chromatin subfamily B member 1         |
| 3144                     | UPI000013D3AE    | 4                    | 12             | 20.8                  | 394    | 45050 | 5.8  | SWI/SNF-related matrix-associated actin-dependent regulator of chromatin subfamily B member 1 (Integrase interactor 1 protein) (hSNF5) (BAF47).                                                     |
| 3144                     | Q9H836           | 4                    | 12             | 20.8                  | 394    | 45051 | 5.6  | cDNA FLJ13963 fis, clone Y79AA1001299, highly similar to sapiens integrase interactor 1b protein (INI1B)                                                                                            |
| 3145                     | Q2NLD4           | 4                    | 7              | 23.5                  | 285    | 32015 | 7    | PURA protein (Fragment)                                                                                                                                                                             |
| 3145                     | Q2NLC9           | 4                    | 7              | 22.3                  | 300    | 34166 | 9.2  | PURA protein (Fragment)                                                                                                                                                                             |
| 3145                     | P42669           | 4                    | 7              | 20.9                  | 321    | 34884 | 6.4  | Transcriptional activator protein Pur-alpha                                                                                                                                                         |
| 3145                     | Q8C6E9           | 4                    | 7              | 20.9                  | 321    | 34982 | 7.1  | Putative uncharacterized protein                                                                                                                                                                    |
| 3145                     | Q56A79           | 4                    | 7              | 20.8                  | 322    | 34939 | 6.7  | Purine-rich element binding protein A                                                                                                                                                               |
| 3145                     | Q00577           | 4                    | 7              | 20.8                  | 322    | 34911 | 6.4  | Transcriptional activator protein Pur-alpha                                                                                                                                                         |
| 3146                     | B3KLUY1          | 4                    | 49             | 20.6                  | 209    | 24190 | 11.9 | Splicing factor, arginine/serine-rich 2, isoform CRA_d                                                                                                                                              |
| 3146                     | B4DN89           | 4                    | 49             | 20.6                  | 209    | 24153 | 11.9 | Splicing factor, arginine/serine-rich 2, isoform CRA_g                                                                                                                                              |
| 3146                     | Q53FN0           | 4                    | 49             | 19.5                  | 221    | 25502 | 11.9 | Splicing factor, arginine/serine-rich 2 variant (Fragment) Serine/arginine-rich splicing factor 2 Serine/arginine-rich splicing factor 2                                                            |
| 3146                     | Q01130           | 4                    | 49             | 19.5                  | 221    | 25476 | 11.9 | factor 2                                                                                                                                                                                            |
| 3146                     | Q8C671           | 4                    | 49             | 16.9                  | 254    | 29001 | 11.2 | Putative uncharacterized protein                                                                                                                                                                    |
| 3146                     | E9Q975           | 4                    | 49             | 16.9                  | 254    | 28918 | 11.4 | Uncharacterized protein                                                                                                                                                                             |
| 3147                     | Q3UXV4           | 4                    | 5              | 21.9                  | 452    | 51446 | 5.8  | Serine/threonine-protein phosphatase                                                                                                                                                                |
| 3147                     | Q5F2F8           | 4                    | 5              | 20                    | 496    | 56015 | 5.7  | Serine/threonine-protein phosphatase                                                                                                                                                                |
| 3147                     | E9Q6P2           | 4                    | 5              | 19.9                  | 497    | 56098 | 5.7  | Uncharacterized protein                                                                                                                                                                             |
| 3147                     | P16298-3         | 4                    | 5              | 19.3                  | 514    | 57982 | 6.1  | Isoform 3 of Serine/threonine-protein phosphatase 2B catalytic subunit beta isoform                                                                                                                 |
| 3147                     | P16298-2         | 4                    | 5              | 19.3                  | 514    | 58013 | 5.6  | Isoform 2 of Serine/threonine-protein phosphatase 2B catalytic subunit beta isoform                                                                                                                 |
| 3147                     | UPI000154C8F1    | 4                    | 5              | 19.2                  | 515    | 58131 | 6.1  | protein phosphatase 3, catalytic subunit, beta isoform                                                                                                                                              |
| 3147                     | E0CZ78           | 4                    | 5              | 18.9                  | 524    | 59074 | 5.9  | Serine/threonine-protein phosphatase                                                                                                                                                                |
| 3147                     | Q8N1F0           | 4                    | 5              | 18.9                  | 525    | 59123 | 5.9  | Serine/threonine-protein phosphatase                                                                                                                                                                |
| 3147                     | P48453-2         | 4                    | 5              | 18.9                  | 524    | 58929 | 5.9  | Isoform 1 of Serine/threonine-protein phosphatase 2B catalytic subunit beta isoform                                                                                                                 |
| 3147                     | P48453           | 4                    | 5              | 18.9                  | 525    | 59174 | 5.9  | Serine/threonine-protein phosphatase 2B catalytic subunit beta isoform                                                                                                                              |
| 3147                     | P16298           | 4                    | 5              | 18.9                  | 524    | 59024 | 5.9  | Serine/threonine-protein phosphatase 2B catalytic subunit beta isoform                                                                                                                              |
| 3148                     | Q969T9           | 4                    | 14             | 24.9                  | 261    | 28087 | 5.9  | WW domain-binding protein 2                                                                                                                                                                         |
| 3148                     | Q3TRG5           | 4                    | 14             | 24.9                  | 261    | 28079 | 6.5  | Putative uncharacterized protein                                                                                                                                                                    |
| 3148                     | P97765           | 4                    | 14             | 24.9                  | 261    | 28032 | 6.3  | WW domain-binding protein 2                                                                                                                                                                         |
| 3148                     | E9Q1S7           | 4                    | 14             | 18.8                  | 345    | 36943 | 9.3  | Uncharacterized protein                                                                                                                                                                             |
| 3148                     | Q9DBP6           | 4                    | 14             | 18.7                  | 348    | 37194 | 9.3  | Putative uncharacterized protein                                                                                                                                                                    |
| 3149                     | UPI000049E0CA    | 4                    | 10             | 17.5                  | 229    | 24770 | 7.9  | UPI000049E0CA UniRef100 entry                                                                                                                                                                       |
| 3149                     | Q96CG8           | 4                    | 10             | 16.5                  | 243    | 26224 | 8    | Collagen triple helix repeat-containing protein 1                                                                                                                                                   |
| 3149                     | A2RRY6           | 4                    | 10             | 16.3                  | 245    | 26434 | 7.5  | Collagen triple helix repeat containing 1                                                                                                                                                           |
| 3149                     | Q9D1D6           | 4                    | 10             | 16.3                  | 245    | 26460 | 7.1  | Collagen triple helix repeat-containing protein 1                                                                                                                                                   |
| 3149                     | Q3UAP6           | 4                    | 10             | 16.3                  | 245    | 26460 | 7.5  | MCG15508                                                                                                                                                                                            |
| 3150                     | Q9JKC8           | 4                    | 4              | 16                    | 418    | 46936 | 6.9  | AP-3 complex subunit mu-1                                                                                                                                                                           |
| 3150                     | Q9Y2T2           | 4                    | 4              | 16                    | 418    | 46939 | 6.9  | AP-3 complex subunit mu-1                                                                                                                                                                           |
| 3151                     | C9JB13           | 4                    | 13             | 15.6                  | 422    | 46160 | 4.7  | Uncharacterized protein                                                                                                                                                                             |
| 3151                     | Q80Y55           | 4                    | 13             | 15.5                  | 427    | 46953 | 4.4  | BSD domain-containing protein 1                                                                                                                                                                     |
| 3151                     | Q9NW68           | 4                    | 13             | 15.3                  | 430    | 47163 | 4.5  | BSD domain-containing protein 1                                                                                                                                                                     |
| 3152                     | B7Z6Y2           | 4                    | 8              | 15.1                  | 385    | 43165 | 5.3  | cDNA FLJ54942, highly similar to sapiens bridging integrator 1 (BIN1), transcript variant 10, mRNA                                                                                                  |
| 3152                     | O00499-9         | 4                    | 8              | 14.2                  | 409    | 45563 | 5.5  | Isoform BIN1-10-13 of Myc box-dependent-interacting protein 1                                                                                                                                       |
| 3152                     | O00499-10        | 4                    | 8              | 13.7                  | 424    | 47491 | 6.6  | Isoform BIN1-13 of Myc box-dependent-interacting protein 1                                                                                                                                          |
| 3152                     | O08539-2         | 4                    | 8              | 13.4                  | 434    | 48014 | 5.2  | Isoform 2 of Myc box-dependent-interacting protein 1                                                                                                                                                |
| 3152                     | O00499-7         | 4                    | 8              | 13.2                  | 439    | 48258 | 5.2  | Isoform I13 of Myc box-dependent-interacting protein 1                                                                                                                                              |
| 3152                     | O00499-8         | 4                    | 8              | 12.8                  | 454    | 50185 | 5.9  | Isoform BIN1 of Myc box-dependent-interacting protein 1                                                                                                                                             |
| 3152                     | Q6P1B9           | 4                    | 8              | 12.2                  | 477    | 52764 | 5.2  | Bin1 protein                                                                                                                                                                                        |
| 3152                     | O00499-4         | 4                    | 8              | 12.2                  | 475    | 51737 | 5    | Isoform I1C2 of Myc box-dependent-interacting protein 1                                                                                                                                             |
| 3152                     | O00499-6         | 4                    | 8              | 12                    | 482    | 53020 | 5.3  | Isoform I12 of Myc box-dependent-interacting protein 1                                                                                                                                              |
| 3152                     | Q8WWH9           | 4                    | 8              | 11.8                  | 490    | 53167 | 5.1  | Amphiphysin IIb-1                                                                                                                                                                                   |
| 3152                     | O00499-11        | 4                    | 8              | 11.7                  | 497    | 54948 | 6    | Isoform BIN1+12A of Myc box-dependent-interacting protein 1                                                                                                                                         |
| 3152                     | O00499-3         | 4                    | 8              | 11.5                  | 506    | 55175 | 5.2  | Isoform I1C1 of Myc box-dependent-interacting protein 1                                                                                                                                             |
| 3152                     | O00499-2         | 4                    | 8              | 11.2                  | 518    | 56499 | 5.1  | Isoform I1B of Myc box-dependent-interacting protein 1                                                                                                                                              |
| 3152                     | O00499-5         | 4                    | 8              | 10.5                  | 550    | 59937 | 5    | Isoform I1D of Myc box-dependent-interacting protein 1                                                                                                                                              |
| 3152                     | O08539           | 4                    | 8              | 9.9                   | 588    | 64470 | 5    | Myc box-dependent-interacting protein 1                                                                                                                                                             |
| 3152                     | O00499           | 4                    | 8              | 9.8                   | 593    | 64699 | 5.1  | Myc box-dependent-interacting protein 1                                                                                                                                                             |
| 3153                     | Q9UHR5-2         | 4                    | 7              | 15.8                  | 292    | 32069 | 5.1  | Isoform 2 of SAP30-binding protein                                                                                                                                                                  |
| 3153                     | Q02614           | 4                    | 7              | 14.9                  | 308    | 33832 | 4.9  | SAP30-binding protein                                                                                                                                                                               |
| 3153                     | Q9UHR5           | 4                    | 7              | 14.9                  | 308    | 33870 | 4.8  | SAP30-binding protein                                                                                                                                                                               |
| 3154                     | P25490           | 4                    | 10             | 14.7                  | 414    | 44713 | 6.3  | Transcriptional repressor protein YY1                                                                                                                                                               |

Table S1. Proteins identified in the OVCAR-3 tumor supernatant by two or more unique peptides.

| Protein or Protein Group | Accession Number | Unique Peptide Count | Spectrum Count | Sequence Coverage (%) | Length | MolWt  | pI  | Descriptive Name                                                                                                              |
|--------------------------|------------------|----------------------|----------------|-----------------------|--------|--------|-----|-------------------------------------------------------------------------------------------------------------------------------|
| 3154                     | Q00899           | 4                    | 10             | 14.7                  | 414    | 44717  | 6.3 | Transcriptional repressor protein YY1                                                                                         |
| 3155                     | B4DSZ6           | 4                    | 7              | 14.3                  | 322    | 36171  | 8.4 | cDNA FLJ50654, highly similar to Isocitrate dehydrogenase                                                                     |
| 3155                     | Q53GL5           | 4                    | 7              | 10.2                  | 452    | 50910  | 8.5 | Isocitrate dehydrogenase [NADP] (Fragment)                                                                                    |
| 3155                     | P54071           | 4                    | 7              | 10.2                  | 452    | 50906  | 8.7 | Isocitrate dehydrogenase [NADP], mitochondrial                                                                                |
| 3155                     | P48735           | 4                    | 7              | 10.2                  | 452    | 50909  | 8.7 | Isocitrate dehydrogenase [NADP], mitochondrial                                                                                |
| 3156                     | E9PI99           | 4                    | 14             | 32.6                  | 141    | 16203  | 7.3 | Uncharacterized protein                                                                                                       |
| 3156                     | Q5T6K6           | 4                    | 14             | 18.1                  | 254    | 28450  | 5.7 | Nuclear transcription factor Y, gamma (Fragment)                                                                              |
| 3156                     | Q7TPS7           | 4                    | 14             | 16.7                  | 275    | 30647  | 5.7 | Nfyc protein                                                                                                                  |
| 3156                     | Q5T6K9           | 4                    | 14             | 15.3                  | 301    | 33702  | 5.1 | Nuclear transcription factor Y, gamma                                                                                         |
| 3156                     | Q13952-2         | 4                    | 14             | 13.7                  | 335    | 37194  | 5   | Isoform 1 of Nuclear transcription factor Y subunit gamma                                                                     |
| 3156                     | P70353           | 4                    | 14             | 13.7                  | 335    | 37254  | 5   | Nuclear transcription factor Y subunit gamma<br>cDNA FLJ58328, highly similar to Nuclear transcription factor Y subunit gamma |
| 3156                     | B4DUS6           | 4                    | 14             | 13                    | 354    | 39346  | 5.5 | Nuclear transcription factor Y, gamma variant (Fragment)                                                                      |
| 3156                     | Q59GY4           | 4                    | 14             | 12.2                  | 378    | 41595  | 6.1 | Nuclear transcription factor Y, gamma variant (Fragment)                                                                      |
| 3156                     | E9PF96           | 4                    | 14             | 12.1                  | 380    | 41379  | 8.1 | Uncharacterized protein                                                                                                       |
| 3156                     | Q13952-3         | 4                    | 14             | 10.5                  | 439    | 48150  | 5.4 | Isoform 2 of Nuclear transcription factor Y subunit gamma                                                                     |
| 3156                     | Q13952           | 4                    | 14             | 10                    | 458    | 50302  | 6.1 | Nuclear transcription factor Y subunit gamma                                                                                  |
| 3157                     | Q0QEN7           | 4                    | 5              | 15.3                  | 445    | 48113  | 5.1 | ATP synthase subunit beta (Fragment)                                                                                          |
| 3157                     | P06576           | 4                    | 5              | 12.9                  | 529    | 56560  | 5.4 | ATP synthase subunit beta, mitochondrial                                                                                      |
| 3157                     | P56480           | 4                    | 5              | 12.9                  | 529    | 56301  | 5.3 | ATP synthase subunit beta, mitochondrial                                                                                      |
| 3158                     | Q3TJZ6           | 4                    | 8              | 12.6                  | 515    | 55055  | 9   | Protein FAM98A                                                                                                                |
| 3158                     | Q8NCA5-2         | 4                    | 8              | 12.5                  | 518    | 55272  | 9   | Isoform 2 of Protein FAM98A                                                                                                   |
| 3158                     | Q8NCA5           | 4                    | 8              | 12.5                  | 519    | 55401  | 9   | Protein FAM98A                                                                                                                |
| 3159                     | B4DDI6           | 4                    | 7              | 11.5                  | 461    | 50734  | 5.1 | cDNA FLJ52585                                                                                                                 |
| 3159                     | B4DVT3           | 4                    | 7              | 11                    | 482    | 53588  | 5.4 | cDNA FLJ50705                                                                                                                 |
| 3159                     | Q8R3P6           | 4                    | 7              | 10.3                  | 515    | 57237  | 5.2 | UPF0464 protein C15orf44 log                                                                                                  |
| 3159                     | Q96SY0           | 4                    | 7              | 10.2                  | 518    | 57471  | 5.1 | UPF0464 protein C15orf44                                                                                                      |
| 3160                     | P98083-2         | 4                    | 6              | 12.8                  | 469    | 51409  | 7.1 | Isoform p52Shc of SHC-transforming protein 1                                                                                  |
| 3160                     | P29353-7         | 4                    | 6              | 12.7                  | 474    | 51682  | 7.2 | Isoform 7 of SHC-transforming protein 1                                                                                       |
| 3160                     | P29353-2         | 4                    | 6              | 12.7                  | 473    | 51611  | 7.2 | Isoform p52Shc of SHC-transforming protein 1                                                                                  |
| 3160                     | P98083           | 4                    | 6              | 10.4                  | 579    | 62608  | 6.5 | SHC-transforming protein 1                                                                                                    |
| 3160                     | P29353           | 4                    | 6              | 10.3                  | 583    | 62822  | 6.4 | SHC-transforming protein 1                                                                                                    |
| 3160                     | P29353-6         | 4                    | 6              | 10.3                  | 584    | 62893  | 6.4 | Isoform 6 of SHC-transforming protein 1                                                                                       |
| 3161                     | E7ETD9           | 4                    | 4              | 34.3                  | 181    | 20857  | 9.8 | Uncharacterized protein                                                                                                       |
| 3161                     | A1L366           | 4                    | 4              | 9.8                   | 635    | 72057  | 4.6 | RAD21 log (S. pombe)                                                                                                          |
| 3161                     | Q810A8           | 4                    | 4              | 9.8                   | 635    | 72083  | 4.6 | Putative uncharacterized protein                                                                                              |
| 3161                     | Q61550           | 4                    | 4              | 9.8                   | 635    | 72023  | 4.6 | Double-strand-break repair protein rad21 log                                                                                  |
| 3161                     | Q60216           | 4                    | 4              | 9.8                   | 631    | 71690  | 4.7 | Double-strand-break repair protein rad21 log                                                                                  |
| 3162                     | Q15124-2         | 4                    | 9              | 13.7                  | 387    | 41790  | 6.6 | Isoform 2 of Phosphoglucomutase-like protein 5                                                                                |
| 3162                     | Q15124           | 4                    | 9              | 9.3                   | 567    | 62225  | 7.2 | Phosphoglucomutase-like protein 5                                                                                             |
| 3162                     | Q8BZF8           | 4                    | 9              | 9.3                   | 567    | 62220  | 7.2 | Phosphoglucomutase-like protein 5<br>cDNA, FLJ78843, highly similar to Guanylate cyclase soluble subunit beta-1 (EC4.6.1.2)   |
| 3163                     | B7Z9H9           | 4                    | 8              | 9.8                   | 551    | 62702  | 5.6 | Guanylate cyclase 1, soluble, beta 3, isoform CRA_c                                                                           |
| 3163                     | B7Z685           | 4                    | 8              | 9.8                   | 551    | 62762  | 5.6 | Guanylate cyclase 1, soluble, beta 3, isoform CRA_c                                                                           |
| 3163                     | Q02153-2         | 4                    | 8              | 9.2                   | 586    | 66738  | 5.2 | Isoform HSGC-2 of Guanylate cyclase soluble subunit beta-1                                                                    |
| 3163                     | D6RC99           | 4                    | 8              | 9.1                   | 594    | 67519  | 5.9 | Uncharacterized protein<br>cDNA FLJ59711, highly similar to Guanylate cyclase soluble subunit beta-1 (EC 4.6.1.2)             |
| 3163                     | B7Z426           | 4                    | 8              | 9                     | 599    | 68165  | 5.4 | Guanylate cyclase soluble subunit beta-1 (EC 4.6.1.2)                                                                         |
| 3163                     | Q80YP4           | 4                    | 8              | 8.9                   | 609    | 68995  | 5.5 | Gucy1b3 protein                                                                                                               |
| 3163                     | B2RCP1           | 4                    | 8              | 8.7                   | 619    | 70487  | 5.4 | cDNA, FLJ96185, highly similar to sapiens guanylate cyclase 1, soluble, beta 3 (GUCY1B3), mRNA                                |
| 3163                     | Q02153           | 4                    | 8              | 8.7                   | 619    | 70515  | 5.4 | Guanylate cyclase soluble subunit beta-1                                                                                      |
| 3163                     | Q54865           | 4                    | 8              | 8.7                   | 620    | 70598  | 5.3 | Guanylate cyclase soluble subunit beta-1<br>cDNA FLJ77274, highly similar to sapiens importin 13 (IPO13), mRNA                |
| 3164                     | A8K2A8           | 4                    | 21             | 7.5                   | 963    | 108181 | 5.2 | Importin-13                                                                                                                   |
| 3164                     | Q8K0C1           | 4                    | 21             | 7.5                   | 963    | 108229 | 5.3 | Importin-13                                                                                                                   |
| 3164                     | Q3UDQ3           | 4                    | 21             | 7.5                   | 963    | 108171 | 5.3 | Putative uncharacterized protein                                                                                              |
| 3164                     | Q94829           | 4                    | 21             | 7.5                   | 963    | 108195 | 5.3 | Importin-13                                                                                                                   |
| 3165                     | Q80UY7           | 4                    | 6              | 23                    | 274    | 31070  | 7   | Scy2 protein (Fragment)                                                                                                       |
| 3165                     | Q6P3W7           | 4                    | 6              | 6.8                   | 929    | 103709 | 8.2 | SCY1-like protein 2                                                                                                           |
| 3165                     | Q8CFE4           | 4                    | 6              | 6.8                   | 930    | 103317 | 8   | SCY1-like protein 2                                                                                                           |
| 3166                     | Q3UYZ8           | 4                    | 6              | 7.9                   | 598    | 68597  | 8.3 | Putative uncharacterized protein (Fragment)                                                                                   |
| 3166                     | Q3USR8           | 4                    | 6              | 7.9                   | 596    | 68350  | 8.1 | Putative uncharacterized protein (Fragment)                                                                                   |
| 3166                     | P49711           | 4                    | 6              | 6.5                   | 727    | 82785  | 7   | Transcriptional repressor CTCF                                                                                                |
| 3166                     | Q61164           | 4                    | 6              | 6.4                   | 736    | 83746  | 6.9 | Transcriptional repressor CTCF<br>cDNA, FLJ95470, highly similar to sapiens log of yeast Sec5 (SEC5), mRNA                    |
| 3167                     | B2RBE6           | 4                    | 4              | 5.4                   | 924    | 104081 | 7   | Exocyst complex component 2                                                                                                   |
| 3167                     | Q9D4H1           | 4                    | 4              | 5.4                   | 924    | 103959 | 7.2 | Exocyst complex component 2                                                                                                   |
| 3167                     | Q96KP1           | 4                    | 4              | 5.4                   | 924    | 104066 | 6.9 | Exocyst complex component 2<br>cDNA FLJ32002 fis, clone NT2RP7009394, highly similar to Exocyst complex component 2           |
| 3167                     | B3KPN7           | 4                    | 4              | 5.4                   | 924    | 104124 | 6.8 | Exocyst complex component 2                                                                                                   |
| 3168                     | Q149N2           | 4                    | 8              | 6.6                   | 1106   | 127529 | 7.9 | DOCK4 protein                                                                                                                 |
| 3168                     | Q8BMP2           | 4                    | 8              | 6.4                   | 1134   | 131167 | 7.1 | Putative uncharacterized protein                                                                                              |
| 3168                     | Q8N110-2         | 4                    | 8              | 3.8                   | 1937   | 222216 | 7.6 | Isoform 2 of Dedicator of cytokinesis protein 4                                                                               |
| 3168                     | E9PXU8           | 4                    | 8              | 3.8                   | 1940   | 222587 | 7.6 | Uncharacterized protein                                                                                                       |
| 3168                     | B2RUG6           | 4                    | 8              | 3.8                   | 1936   | 222195 | 7.6 | Dock4 protein                                                                                                                 |
| 3168                     | A4D0S8           | 4                    | 8              | 3.7                   | 1966   | 225219 | 7.6 | Dedicator of cytokinesis 4                                                                                                    |
| 3168                     | UPI0001F796D7    | 4                    | 8              | 3.7                   | 1978   | 226510 | 7.8 | UPI0001F796D7 UniRef100 entry                                                                                                 |
| 3168                     | UPI000198CF9E    | 4                    | 8              | 3.7                   | 1999   | 228634 | 7.8 | UPI000198CF9E UniRef100 entry                                                                                                 |
| 3168                     | Q8N110-3         | 4                    | 8              | 3.7                   | 1975   | 226176 | 7.6 | Isoform 3 of Dedicator of cytokinesis protein 4                                                                               |
| 3168                     | Q8N110           | 4                    | 8              | 3.7                   | 1966   | 225204 | 7.6 | Dedicator of cytokinesis protein 4                                                                                            |
| 3168                     | Q149N6           | 4                    | 8              | 3.7                   | 1966   | 225280 | 7.6 | Dedicator of cytokinesis 4                                                                                                    |
| 3168                     | P59764           | 4                    | 8              | 3.7                   | 1978   | 226547 | 7.6 | Dedicator of cytokinesis protein 4                                                                                            |
| 3168                     | Q149N5           | 4                    | 8              | 3.6                   | 2011   | 230090 | 7.8 | DOCK4 protein                                                                                                                 |
| 3169                     | Q6DIC7           | 4                    | 5              | 3.2                   | 2044   | 231369 | 6.9 | Phosphatidylinositol 4-kinase, catalytic, alpha polypeptide                                                                   |
| 3169                     | P42356           | 4                    | 5              | 3.2                   | 2044   | 231317 | 6.9 | Phosphatidylinositol 4-kinase alpha                                                                                           |
| 3169                     | E9Q3L2           | 4                    | 5              | 3.2                   | 2044   | 231353 | 6.9 | Uncharacterized protein<br>cDNA FLJ60960, highly similar to Phosphatidylinositol 4-kinase alpha (EC 2.7.1.67)                 |
| 3169                     | B4DYG6           | 4                    | 5              | 3.1                   | 2102   | 236754 | 7.1 | Putative uncharacterized protein DKFZp762A083 (Fragment)                                                                      |
| 3170                     | Q69YP8           | 4                    | 6              | 3.7                   | 1698   | 196514 | 6.2 | myosin X                                                                                                                      |
| 3170                     | UPI0000F221D0    | 4                    | 6              | 3.1                   | 2062   | 237321 | 6.3 | Myosin-X                                                                                                                      |
| 3170                     | Q9HD67           | 4                    | 6              | 3.1                   | 2058   | 237345 | 6.2 | Myosin-X                                                                                                                      |
| 3170                     | E7EPL7           | 4                    | 6              | 3                     | 2069   | 238515 | 6.1 | Uncharacterized protein                                                                                                       |
| 3171                     | Q6KCD5-2         | 4                    | 12             | 2.7                   | 2691   | 303762 | 7.8 | Isoform 2 of Nipped-B-like protein                                                                                            |
| 3171                     | Q6KC79-2         | 4                    | 12             | 2.7                   | 2697   | 304343 | 7.8 | Isoform 2 of Nipped-B-like protein                                                                                            |
| 3171                     | Q6IEH8           | 4                    | 12             | 2.6                   | 2804   | 316066 | 7.9 | Transcriptional regulator                                                                                                     |
| 3171                     | Q6KCD5           | 4                    | 12             | 2.6                   | 2798   | 315450 | 7.9 | Nipped-B-like protein                                                                                                         |
| 3171                     | Q6KC79           | 4                    | 12             | 2.6                   | 2804   | 316051 | 7.9 | Nipped-B-like protein                                                                                                         |
| 3172                     | Q9D1L9           | 4                    | 18             | 81.3                  | 91     | 9642   | 4.9 | Hepatitis B virus X-interacting protein homolog                                                                               |
| 3173                     | D3Z016           | 4                    | 12             | 63.4                  | 82     | 9205   | 8.6 | Uncharacterized protein                                                                                                       |
| 3173                     | P0C7N9           | 4                    | 12             | 42.3                  | 123    | 13974  | 6.1 | Proteasome assembly chaperone 4                                                                                               |
| 3174                     | Q3TFU6           | 4                    | 16             | 62.2                  | 90     | 9417   | 9.6 | Histone H2A                                                                                                                   |
| 3175                     | Q9QUH0           | 4                    | 7              | 57.9                  | 107    | 11871  | 8.4 | Glutaredoxin-1                                                                                                                |
| 3176                     | Q8BSL7           | 4                    | 73             | 54.7                  | 181    | 20746  | 6.6 | ADP-ribosylation factor 2                                                                                                     |

Table S1. Proteins identified in the OVCAR-3 tumor supernatant by two or more unique peptides.

| Protein or Protein Group | Accession Number | Unique Peptide Count | Spectrum Count | Sequence Coverage (%) | Length | MolWt | pI   | Descriptive Name                                                   |
|--------------------------|------------------|----------------------|----------------|-----------------------|--------|-------|------|--------------------------------------------------------------------|
| 3177                     | Q91VR8           | 4                    | 4              | 54.7                  | 75     | 8761  | 5.5  | Protein BRICK1                                                     |
| 3178                     | Q64522           | 4                    | 32             | 52.3                  | 130    | 14013 | 10.9 | Histone H2A type 2-B                                               |
| 3179                     | Q9EQI5           | 4                    | 8              | 50.4                  | 113    | 12252 | 8.7  | Chemokine (C-X-C motif) ligand 7, isoform CRA_b                    |
| 3180                     | P08905           | 4                    | 10             | 50                    | 148    | 16689 | 8.8  | Lysozyme C-2                                                       |
| 3181                     | Q9D104           | 4                    | 11             | 45.8                  | 144    | 16095 | 9.9  | Putative uncharacterized protein                                   |
| 3182                     | D3YXP7           | 4                    | 47             | 43.8                  | 121    | 13926 | 6.2  | Uncharacterized protein                                            |
| 3183                     | Q9CR51           | 4                    | 16             | 43.2                  | 118    | 13724 | 8    | V-type proton ATPase subunit G 1                                   |
| 3184                     | Q3UCX7           | 4                    | 15             | 41.9                  | 215    | 23600 | 7.8  | Putative uncharacterized protein                                   |
| 3185                     | P97352           | 4                    | 9              | 41.8                  | 98     | 11158 | 6.2  | Protein S100-A13                                                   |
| 3186                     | Q9CQM5           | 4                    | 6              | 41.5                  | 123    | 14015 | 4.8  | Thioredoxin domain-containing protein 17                           |
| 3187                     | UPI0001548D14    | 4                    | 19             | 56.1                  | 98     | 11142 | 5.3  | cytochrome b-5                                                     |
| 3187                     | P56395           | 4                    | 19             | 41                    | 134    | 15241 | 5.1  | Cytochrome b5                                                      |
| 3188                     | Q9CQR2           | 4                    | 20             | 41                    | 83     | 9141  | 8.5  | 40S ribosomal protein S21                                          |
| 3189                     | P49962           | 4                    | 7              | 39.5                  | 86     | 10194 | 8    | Signal recognition particle 9 kDa protein                          |
| 3190                     | P31725           | 4                    | 18             | 38.9                  | 113    | 13049 | 7.2  | Protein S100-A9                                                    |
| 3191                     | D3YU66           | 4                    | 125            | 38.5                  | 96     | 10843 | 5.1  | Uncharacterized protein                                            |
| 3191                     | UPI00002643A     | 4                    | 125            | 37.8                  | 98     | 11141 | 5.2  | UPI00002643A UniRef100 entry                                       |
| 3191                     | P50543           | 4                    | 125            | 37.8                  | 98     | 11083 | 5.5  | Protein S100-A11                                                   |
| 3192                     | Q8R2K3           | 4                    | 9              | 38.5                  | 148    | 17157 | 9.8  | Single-stranded DNA binding protein 1                              |
| 3193                     | Q8R048           | 4                    | 7              | 54.4                  | 103    | 11970 | 5.9  | C-myc binding protein                                              |
| 3193                     | Q8C5M8           | 4                    | 7              | 54.4                  | 103    | 11998 | 6.3  | Putative uncharacterized protein                                   |
| 3193                     | A2A7K5           | 4                    | 7              | 38.4                  | 146    | 16614 | 9.1  | C-myc binding protein                                              |
| 3194                     | Q9DAK9           | 4                    | 7              | 37.9                  | 124    | 13997 | 5.5  | 14 kDa phosphohistidine phosphatase                                |
| 3195                     | Q64339           | 4                    | 8              | 36                    | 161    | 17898 | 7.9  | Ubiquitin-like protein ISG15                                       |
| 3196                     | Q99LJ6           | 4                    | 8              | 36                    | 186    | 21061 | 8.3  | Glutathione peroxidase 7                                           |
| 3197                     | A2A8E2           | 4                    | 10             | 35.5                  | 138    | 15783 | 5.7  | Novel protein (0610037L13Rik)                                      |
| 3197                     | Q8BHG2           | 4                    | 10             | 30.6                  | 160    | 18020 | 5.1  | UPF0587 protein C1orf123 homolog                                   |
| 3197                     | Q8BHG2-3         | 4                    | 10             | 25                    | 196    | 22048 | 6.5  | Isoform 3 of UPF0587 protein C1orf123 homolog                      |
| 3198                     | P97457           | 4                    | 5              | 35.5                  | 169    | 18955 | 4.9  | Myosin regulatory light chain 2, skeletal muscle isoform           |
| 3199                     | E9QKE3           | 4                    | 5              | 34.6                  | 182    | 20375 | 5.4  | Uncharacterized protein                                            |
| 3199                     | Q99PR8           | 4                    | 5              | 34.6                  | 182    | 20405 | 5.4  | Heat shock protein beta-2                                          |
| 3199                     | Q6P3C8           | 4                    | 5              | 34.6                  | 182    | 20322 | 5.3  | Heat shock protein 2                                               |
| 3200                     | P11031           | 4                    | 24             | 34.6                  | 127    | 14427 | 9.6  | Activated RNA polymerase II transcriptional coactivator p15        |
| 3201                     | E9Q926           | 4                    | 11             | 34.4                  | 418    | 47064 | 6.1  | Uncharacterized protein                                            |
| 3202                     | P08207           | 4                    | 10             | 34                    | 97     | 11186 | 6.8  | Protein S100-A10                                                   |
| 3202                     | Q3UF30           | 4                    | 10             | 34                    | 97     | 11213 | 6.8  | Putative uncharacterized protein                                   |
| 3203                     | P25785           | 4                    | 10             | 31.8                  | 220    | 24328 | 7.5  | Metalloproteinase inhibitor 2                                      |
| 3203                     | Q8BSJ3           | 4                    | 10             | 31.8                  | 220    | 24342 | 7.5  | Putative uncharacterized protein                                   |
| 3203                     | P30121           | 4                    | 10             | 31.8                  | 220    | 24356 | 7.5  | Metalloproteinase inhibitor 2                                      |
| 3204                     | Q8BG94           | 4                    | 6              | 31                    | 200    | 22652 | 5.9  | COMM domain-containing protein 7                                   |
| 3205                     | P21570           | 4                    | 8              | 29.7                  | 145    | 16228 | 9.4  | Angiogenin                                                         |
| 3206                     | Q3TIF8           | 4                    | 116            | 29.3                  | 133    | 15395 | 10.7 | 40S ribosomal protein S24                                          |
| 3207                     | Q6P8I4           | 4                    | 18             | 28.7                  | 178    | 18963 | 7.5  | PEST proteolytic signal-containing nuclear protein                 |
| 3208                     | P05977           | 4                    | 9              | 28.2                  | 188    | 20594 | 5    | Myosin light chain 1/3, skeletal muscle isoform                    |
| 3209                     | E9PZ20           | 4                    | 4              | 28                    | 225    | 25360 | 6.2  | Uncharacterized protein                                            |
| 3209                     | P14847           | 4                    | 4              | 28                    | 225    | 25361 | 6.2  | C-reactive protein                                                 |
| 3210                     | Q9EQW9           | 4                    | 11             | 27.4                  | 146    | 16879 | 8.7  | Ionized calcium binding adapter molecule 1                         |
| 3210                     | Q70200           | 4                    | 11             | 27.2                  | 147    | 16911 | 8.8  | Allograft inflammatory factor 1                                    |
| 3211                     | UPI00001E501A    | 4                    | 6              | 30.6                  | 235    | 24677 | 8.6  | PREDICTED: ES1 protein homolog, mitochondrial-like isoform 2       |
| 3211                     | Q9D172           | 4                    | 6              | 27.1                  | 266    | 28090 | 8.8  | ES1 protein homolog, mitochondrial                                 |
| 3212                     | P70202           | 4                    | 7              | 26.6                  | 222    | 25492 | 5.7  | Latexin                                                            |
| 3213                     | Q9CQ89           | 4                    | 68             | 26                    | 177    | 18865 | 6.8  | Protein CutA                                                       |
| 3214                     | E9QJS2           | 4                    | 6              | 25.8                  | 225    | 25054 | 6.1  | Uncharacterized protein                                            |
| 3214                     | Q99LS3           | 4                    | 6              | 25.8                  | 225    | 25096 | 6.1  | Phosphoserine phosphatase                                          |
| 3215                     | A2A9W3           | 4                    | 6              | 25.1                  | 203    | 23312 | 5.2  | Likely ortholog of H. sapiens AD023 protein                        |
| 3215                     | Q3UBZ5           | 4                    | 6              | 23                    | 222    | 25493 | 5.1  | MIF4G domain-containing protein                                    |
| 3216                     | Q8R395           | 4                    | 6              | 25                    | 244    | 24493 | 8.1  | COMM domain-containing protein 5                                   |
| 3217                     | Q05BC5           | 4                    | 11             | 24.2                  | 228    | 27499 | 6.5  | Arfgap1 protein                                                    |
| 3217                     | Q9EPJ9-2         | 4                    | 11             | 15.3                  | 392    | 42957 | 5.5  | Isoform 2 of ADP-ribosylation factor GTPase-activating protein 1   |
| 3217                     | Q6PB94           | 4                    | 11             | 15.3                  | 392    | 42932 | 5.4  | Arfgap1 protein                                                    |
| 3217                     | Q3TGS9           | 4                    | 11             | 15.2                  | 394    | 43184 | 5.5  | ADP-ribosylation factor GTPase activating protein 1                |
| 3217                     | Q9EPJ9           | 4                    | 11             | 14.5                  | 414    | 45288 | 5.6  | ADP-ribosylation factor GTPase-activating protein 1                |
|                          |                  |                      |                |                       |        |       |      | Phospholysine phosphohistidine inorganic pyrophosphate             |
| 3218                     | Q9D7I5           | 4                    | 8              | 23.7                  | 270    | 29144 | 5.1  | phosphatase                                                        |
| 3219                     | Q9WUU7           | 4                    | 6              | 23.2                  | 306    | 33996 | 6.6  | Cathepsin Z                                                        |
| 3219                     | E9Q5W3           | 4                    | 6              | 23.1                  | 307    | 34200 | 6.8  | Uncharacterized protein                                            |
| 3219                     | Q9ES94           | 4                    | 6              | 23.1                  | 307    | 34175 | 6.6  | Cathepsin Z                                                        |
| 3220                     | O70325           | 4                    | 11             | 21.8                  | 197    | 22079 | 8.4  | Phospholipid hydroperoxide glutathione peroxidase, mitochondrial   |
| 3220                     | Q91XR9           | 4                    | 11             | 17                    | 253    | 29102 | 10.2 | Phospholipid hydroperoxide glutathione peroxidase, nuclear         |
| 3220                     | Q76LV0           | 4                    | 11             | 17                    | 253    | 29044 | 10.2 | Glutathione peroxidase                                             |
| 3221                     | Q8K354           | 4                    | 4              | 21.7                  | 277    | 30953 | 6.6  | Carbonyl reductase 3                                               |
| 3222                     | Q3TCH7           | 4                    | 6              | 20.4                  | 759    | 87753 | 8.3  | Cullin-4A                                                          |
| 3223                     | O54998           | 4                    | 5              | 20.2                  | 218    | 24913 | 6    | Peptidyl-prolyl cis-trans isomerase FKBP7                          |
| 3224                     | Q3U5R8           | 4                    | 7              | 19.5                  | 277    | 30413 | 5.2  | Putative uncharacterized protein                                   |
| 3224                     | Q9D066           | 4                    | 7              | 19.5                  | 277    | 30395 | 5.2  | Putative uncharacterized protein                                   |
| 3224                     | Q924B0           | 4                    | 7              | 19.5                  | 277    | 30429 | 5.2  | Inositol (Myo)-1(Or 4)-monophosphatase 1                           |
| 3225                     | Q56920           | 4                    | 34             | 19                    | 216    | 23493 | 11   | Ribosomal protein L14                                              |
| 3225                     | Q9CR57           | 4                    | 34             | 18.9                  | 217    | 23564 | 11   | 60S ribosomal protein L14                                          |
| 3225                     | Q9CWX0           | 4                    | 34             | 18.1                  | 227    | 26316 | 11.9 | Putative uncharacterized protein                                   |
|                          |                  |                      |                |                       |        |       |      | nuclear ubiquitously casein and cyclin-dependent kinases substrate |
| 3226                     | UPI0000475CC6    | 4                    | 13             | 18.9                  | 233    | 26184 | 5.1  | isoform 2                                                          |
| 3226                     | Q80XU3           | 4                    | 13             | 18.8                  | 234    | 26313 | 5.1  | Nuclear ubiquitously casein and cyclin-dependent kinases substrate |
| 3227                     | Q3TDG9           | 4                    | 7              | 18.2                  | 274    | 31179 | 5.6  | Putative uncharacterized protein                                   |
| 3227                     | Q9ER00           | 4                    | 7              | 18.2                  | 274    | 31195 | 5.4  | Syntaxin-12                                                        |
| 3227                     | Q3TIL5           | 4                    | 7              | 18.2                  | 274    | 31254 | 5.6  | Putative uncharacterized protein                                   |
| 3228                     | O88968           | 4                    | 6              | 18.1                  | 430    | 47586 | 6.3  | Transcobalamin-2                                                   |
| 3229                     | P14602-2         | 4                    | 10             | 18.3                  | 197    | 21961 | 7    | Isoform B of Heat shock protein beta-1                             |
| 3229                     | P14602           | 4                    | 10             | 17.2                  | 209    | 23014 | 6.5  | Heat shock protein beta-1                                          |
| 3230                     | Q9Z2Y8           | 4                    | 14             | 19.7                  | 274    | 30049 | 8.3  | Proline synthase co-transcribed bacterial homolog protein          |
| 3230                     | Q3UYN1           | 4                    | 14             | 16.6                  | 326    | 35873 | 8.5  | Putative uncharacterized protein                                   |
| 3231                     | Q99KB8           | 4                    | 16             | 16.5                  | 309    | 34084 | 7.7  | Hydroxyacylglutathione hydrolase, mitochondrial                    |
| 3232                     | P43274           | 4                    | 41             | 15.1                  | 219    | 21977 | 11.1 | Histone H1.4                                                       |
| 3233                     | Q8BRQ6           | 4                    | 17             | 14.8                  | 216    | 25153 | 6.2  | Putative uncharacterized protein                                   |
| 3233                     | Q91WN1           | 4                    | 17             | 12.4                  | 259    | 30059 | 5.9  | DnaJ homolog subfamily C member 9                                  |
| 3234                     | Q9JHH6           | 4                    | 5              | 14.7                  | 422    | 48871 | 8    | Carboxypeptidase B2                                                |
| 3235                     | Q9ES30           | 4                    | 19             | 18.3                  | 246    | 26828 | 6.7  | Complement C1q tumor necrosis factor-related protein 3             |
| 3235                     | D3YZ61           | 4                    | 19             | 14.1                  | 319    | 34984 | 7.6  | Uncharacterized protein                                            |
| 3236                     | Q8BH95           | 4                    | 5              | 14.1                  | 290    | 31474 | 8.5  | Enoyl-CoA hydratase, mitochondrial                                 |
| 3237                     | Q91XL1           | 4                    | 9              | 13.5                  | 342    | 37431 | 6.6  | Leucine-rich HEV glycoprotein                                      |
| 3238                     | Q8K2C9           | 4                    | 10             | 12.2                  | 362    | 43131 | 9.1  | 3-hydroxyacyl-CoA dehydratase 3                                    |
| 3239                     | P28650           | 4                    | 6              | 11.4                  | 457    | 50254 | 8.4  | Adenylosuccinate synthetase isozyme 1                              |
| 3239                     | P28650-2         | 4                    | 6              | 10.8                  | 480    | 52780 | 7.8  | Isoform 2 of Adenylosuccinate synthetase isozyme 1                 |



Table S1. Proteins identified in the OVCAR-3 tumor supernatant by two or more unique peptides.

| Protein or Protein Group | Accession Number | Unique Peptide Count | Spectrum Count | Sequence Coverage (%) | Length | MolWt  | pI   | Descriptive Name                                                                                                                  |
|--------------------------|------------------|----------------------|----------------|-----------------------|--------|--------|------|-----------------------------------------------------------------------------------------------------------------------------------|
| 3240                     | Q8BK62           | 4                    | 6              | 11.3                  | 406    | 45746  | 6.2  | Olfactomedin-like protein 3                                                                                                       |
| 3241                     | Q8BJY1           | 4                    | 8              | 11.1                  | 504    | 55972  | 5.2  | 26S proteasome non-ATPase regulatory subunit 5<br>KH domain-containing, RNA-binding, signal transduction-associated protein 1     |
| 3242                     | Q60749           | 4                    | 9              | 9.7                   | 443    | 48371  | 8.7  | Fibulin-5                                                                                                                         |
| 3243                     | Q9WVH9           | 4                    | 8              | 9.6                   | 448    | 50193  | 4.7  | Annexin A11                                                                                                                       |
| 3244                     | P97384           | 4                    | 7              | 9.3                   | 503    | 54111  | 7.7  | Annexin A11                                                                                                                       |
| 3244                     | Q921F1           | 4                    | 7              | 9.3                   | 503    | 54079  | 7.7  | Annexin A11                                                                                                                       |
| 3245                     | P21619           | 4                    | 6              | 8.6                   | 596    | 67318  | 5.5  | Lamin-B2                                                                                                                          |
| 3246                     | O08795           | 4                    | 7              | 8.3                   | 521    | 58793  | 4.5  | Glucosidase 2 subunit beta                                                                                                        |
| 3246                     | Q3TWG2           | 4                    | 7              | 8.3                   | 521    | 58694  | 4.5  | Putative uncharacterized protein                                                                                                  |
| 3246                     | O08795-2         | 4                    | 7              | 8.1                   | 528    | 59560  | 4.5  | Isoform 2 of Glucosidase 2 subunit beta                                                                                           |
| 3247                     | Q3TH60           | 4                    | 33             | 26.5                  | 170    | 19842  | 9.2  | Putative uncharacterized protein (Fragment)                                                                                       |
| 3247                     | P59326           | 4                    | 33             | 8.1                   | 559    | 60879  | 9    | YTH domain family protein 1                                                                                                       |
| 3247                     | A2AWN8           | 4                    | 33             | 7.7                   | 586    | 63900  | 8.9  | YTH domain family 1                                                                                                               |
| 3248                     | B2RTP7           | 4                    | 27             | 6.8                   | 707    | 70923  | 8.1  | Krt2 protein                                                                                                                      |
| 3249                     | P70699           | 4                    | 7              | 6.6                   | 953    | 106248 | 5.8  | Lysosomal alpha-glucosidase                                                                                                       |
| 3250                     | P58281           | 4                    | 4              | 5.8                   | 960    | 111339 | 7.5  | Dynamin-like 120 kDa protein, mitochondrial                                                                                       |
| 3250                     | E9QLC8           | 4                    | 4              | 5.7                   | 978    | 113230 | 7.3  | Uncharacterized protein                                                                                                           |
| 3250                     | P58281-2         | 4                    | 4              | 5.6                   | 997    | 115593 | 7.6  | Isoform 2 of Dynamin-like 120 kDa protein, mitochondrial                                                                          |
| 3251                     | UPI0001F79537    | 4                    | 4              | 5.2                   | 667    | 75497  | 5.6  | complement component 1, r subcomponent                                                                                            |
| 3251                     | Q56616           | 4                    | 4              | 5                     | 707    | 80096  | 5.7  | Complement component 1, r subcomponent                                                                                            |
| 3251                     | Q8CG16           | 4                    | 4              | 5                     | 707    | 80073  | 5.7  | Complement C1r-A subcomponent                                                                                                     |
| 3252                     | Q6GTP5           | 4                    | 5              | 4.6                   | 930    | 106599 | 6.2  | Endoplasmic reticulum aminopeptidase 1                                                                                            |
| 3252                     | Q9EQH2           | 4                    | 5              | 4.6                   | 930    | 106599 | 6.1  | Endoplasmic reticulum aminopeptidase 1                                                                                            |
| 3253                     | Q6DID3           | 4                    | 8              | 4.2                   | 1268   | 139572 | 8.2  | Protein SCAF8                                                                                                                     |
| 3254                     | Q8BYA0           | 4                    | 5              | 4                     | 1196   | 133321 | 6.5  | Tubulin-specific chaperone D                                                                                                      |
| 3255                     | D3Z598           | 4                    | 5              | 3.5                   | 1558   | 166772 | 5.1  | Uncharacterized protein<br>Isoform 2 of Latent-transforming growth factor beta-binding protein 4                                  |
| 3255                     | Q8K4G1-2         | 4                    | 5              | 3.4                   | 1600   | 171376 | 5.2  | 4                                                                                                                                 |
| 3255                     | E9PUG9           | 4                    | 5              | 3.4                   | 1600   | 171303 | 5.2  | Uncharacterized protein                                                                                                           |
| 3255                     | B2RU79           | 4                    | 5              | 3.3                   | 1666   | 178655 | 5.5  | Latent transforming growth factor beta binding protein 4<br>Isoform 3 of Latent-transforming growth factor beta-binding protein 4 |
| 3255                     | Q8K4G1-3         | 4                    | 5              | 3.3                   | 1666   | 178107 | 5.2  | 4                                                                                                                                 |
| 3255                     | Q8K4G1           | 4                    | 5              | 3.3                   | 1666   | 178713 | 5.4  | Latent-transforming growth factor beta-binding protein 4                                                                          |
| 3255                     | E9QPS5           | 4                    | 5              | 3.3                   | 1665   | 177885 | 5.3  | Uncharacterized protein                                                                                                           |
| 3255                     | E9QPD9           | 4                    | 5              | 3.3                   | 1666   | 178641 | 5.5  | Uncharacterized protein                                                                                                           |
| 3256                     | E9Q854           | 4                    | 7              | 2.5                   | 1812   | 195843 | 5.3  | Uncharacterized protein                                                                                                           |
| 3256                     | Q0VD84           | 4                    | 7              | 2.5                   | 1786   | 192824 | 5.4  | Ltbp2 protein                                                                                                                     |
| 3256                     | O08999           | 4                    | 7              | 2.5                   | 1813   | 195829 | 5.3  | Latent-transforming growth factor beta-binding protein 2                                                                          |
| 3256                     | E9QNQ3           | 4                    | 7              | 2.5                   | 1809   | 195543 | 5.4  | Uncharacterized protein                                                                                                           |
| 3257                     | UPI000047059A    | 4                    | 4              | 2.5                   | 1903   | 213497 | 6.6  | protein tyrosine phosphatase, receptor type, D                                                                                    |
| 3257                     | UPI00015DF284    | 4                    | 4              | 2.5                   | 1869   | 209228 | 6.4  | protein tyrosine phosphatase, receptor type, D                                                                                    |
| 3258                     | E9PZQ1           | 4                    | 5              | 2.2                   | 1711   | 197655 | 7.6  | Uncharacterized protein                                                                                                           |
| 3258                     | UPI000154B165    | 4                    | 5              | 2.2                   | 1710   | 197554 | 7.6  | cDNA sequence BC013672                                                                                                            |
| 3259                     | E9Q2T3           | 4                    | 7              | 1.5                   | 3126   | 339905 | 5.4  | Uncharacterized protein                                                                                                           |
| 3259                     | Q3V5L4           | 4                    | 7              | 1.5                   | 3126   | 339953 | 5.4  | Tenascin-X                                                                                                                        |
| 3259                     | O54796           | 4                    | 7              | 1.1                   | 4114   | 447279 | 5.2  | Tenascin-X                                                                                                                        |
| 3259                     | O35452           | 4                    | 7              | 1.1                   | 4006   | 435481 | 5.2  | Tenascin X                                                                                                                        |
| 3260                     | Q6FG99           | 4                    | 105            | 87.7                  | 114    | 11568  | 4.4  | RPLP1 protein                                                                                                                     |
| 3261                     | E9PLX3           | 4                    | 21             | 82.2                  | 90     | 9528   | 6.9  | Uncharacterized protein                                                                                                           |
| 3261                     | O43504           | 4                    | 21             | 81.3                  | 91     | 9614   | 4.9  | Hepatitis B virus X-interacting protein                                                                                           |
| 3262                     | P14618-2         | 4                    | 11             | 80.8                  | 531    | 58062  | 7.7  | Isoform M1 of Pyruvate Kinase isozymes M1/M2                                                                                      |
| 3263                     | Q9UE89           | 4                    | 227            | 78.9                  | 71     | 7799   | 7.2  | Beta-actin (Fragment)                                                                                                             |
| 3264                     | C9JM50           | 4                    | 60             | 61.7                  | 196    | 20843  | 5.4  | Uncharacterized protein                                                                                                           |
| 3265                     | Q15819           | 4                    | 19             | 61.4                  | 145    | 16363  | 8    | Ubiquitin-conjugating enzyme E2 variant 2                                                                                         |
| 3266                     | P47224           | 4                    | 6              | 60.2                  | 123    | 13839  | 5.5  | Guanine nucleotide exchange factor MSS4                                                                                           |
| 3267                     | P63172           | 4                    | 14             | 60.2                  | 113    | 12452  | 5.1  | Dynein light chain Tctex-type 1                                                                                                   |
| 3268                     | P35754           | 4                    | 10             | 58.5                  | 106    | 11776  | 8.1  | Glutaredoxin-1                                                                                                                    |
| 3269                     | P14854           | 4                    | 32             | 57                    | 86     | 10192  | 7    | Cytochrome c oxidase subunit 6B1                                                                                                  |
| 3270                     | Q7Z4G1           | 4                    | 11             | 55.3                  | 85     | 9638   | 6    | COMM domain-containing protein 6                                                                                                  |
| 3271                     | Q8WUW1           | 4                    | 7              | 54.7                  | 75     | 8745   | 5.5  | Protein BRICK1                                                                                                                    |
| 3271                     | Q8WUW1-2         | 4                    | 7              | 38.7                  | 106    | 12046  | 6.8  | Isoform 2 of Protein BRICK1                                                                                                       |
| 3272                     | Q96B45           | 4                    | 7              | 54.3                  | 105    | 11564  | 6.8  | UPF0693 protein C10orf32                                                                                                          |
| 3273                     | P61457           | 4                    | 75             | 52.9                  | 104    | 12000  | 6.8  | Pterin-4-alpha-carbinolamine dehydratase                                                                                          |
| 3274                     | Q9Y2V2           | 4                    | 26             | 50.3                  | 147    | 15892  | 8.2  | Calcium-regulated heat stable protein 1                                                                                           |
| 3275                     | Q9NRG0           | 4                    | 24             | 49.6                  | 131    | 14711  | 5.1  | Chromatin accessibility complex protein 1                                                                                         |
| 3276                     | A8MT69           | 4                    | 6              | 49.4                  | 81     | 8959   | 5.9  | Centromere protein X                                                                                                              |
| 3277                     | Q99878           | 4                    | 67             | 50                    | 128    | 13936  | 10.9 | Histone H2A type 1-J                                                                                                              |
| 3277                     | Q96KK5           | 4                    | 67             | 50                    | 128    | 13906  | 10.9 | Histone H2A type 1-H                                                                                                              |
| 3277                     | Q9BTM1           | 4                    | 67             | 49.6                  | 129    | 14019  | 10.9 | Histone H2A.J                                                                                                                     |
| 3277                     | B2R5B3           | 4                    | 67             | 49.2                  | 130    | 14111  | 11.1 | Histone H2A                                                                                                                       |
| 3277                     | P20671           | 4                    | 67             | 49.2                  | 130    | 14107  | 10.9 | Histone H2A type 1-D                                                                                                              |
| 3277                     | P0C0S8           | 4                    | 67             | 49.2                  | 130    | 14091  | 10.9 | Histone H2A type 1                                                                                                                |
| 3278                     | Q9Y2S0           | 4                    | 9              | 48.9                  | 133    | 15237  | 5.8  | DNA-directed RNA polymerases I and III subunit RPAC2                                                                              |
| 3279                     | O75531           | 4                    | 45             | 48.3                  | 89     | 10059  | 6.1  | Barrier-to-autointegration factor                                                                                                 |
| 3280                     | Q9BVM4           | 4                    | 6              | 47.1                  | 153    | 17329  | 6.9  | Gamma-glutamylaminocyclotransferase                                                                                               |
| 3281                     | Q9HCY8           | 4                    | 11             | 46.2                  | 104    | 11662  | 5.2  | Protein S100-A14                                                                                                                  |
| 3282                     | C9J9P1           | 4                    | 6              | 44.8                  | 125    | 14203  | 5.6  | Uncharacterized protein                                                                                                           |
| 3282                     | C9K0E3           | 4                    | 6              | 25.1                  | 223    | 25476  | 8.5  | Uncharacterized protein                                                                                                           |
| 3282                     | Q05655           | 4                    | 6              | 8.3                   | 676    | 77505  | 7.8  | Protein kinase C delta type                                                                                                       |
| 3283                     | P98179           | 4                    | 32             | 44.6                  | 157    | 17170  | 8.9  | Putative RNA-binding protein 3                                                                                                    |
| 3284                     | E5RGS4           | 4                    | 15             | 44.4                  | 117    | 13466  | 5.5  | Uncharacterized protein                                                                                                           |
| 3284                     | O60925           | 4                    | 15             | 42.6                  | 122    | 14210  | 6.8  | Prefoldin subunit 1                                                                                                               |
| 3285                     | Q9UNM1           | 4                    | 12             | 46.4                  | 97     | 10295  | 9    | Chaperonin 10-related protein (Fragment)                                                                                          |
| 3285                     | P61604           | 4                    | 12             | 44.1                  | 102    | 10932  | 8.9  | 10 kDa heat shock protein, mitochondrial                                                                                          |
| 3286                     | Q9BW61           | 4                    | 5              | 44.1                  | 102    | 11835  | 8.7  | DET1- and DDB1-associated protein 1                                                                                               |
| 3287                     | UPI00015DFAB0    | 4                    | 18             | 58.2                  | 98     | 11267  | 5.5  | Cytochrome b5.                                                                                                                    |
| 3287                     | P00167-2         | 4                    | 18             | 58.2                  | 98     | 11268  | 5.1  | Isoform 2 of Cytochrome b5                                                                                                        |
| 3287                     | Q59F44           | 4                    | 18             | 43.2                  | 132    | 14572  | 5.7  | Cytochrome b-5 isoform 1 variant (Fragment)                                                                                       |
| 3287                     | P00167           | 4                    | 18             | 42.5                  | 134    | 15330  | 5    | Cytochrome b5                                                                                                                     |
| 3288                     | Q9NRY2           | 4                    | 11             | 42.3                  | 104    | 11425  | 9.3  | SOSS complex subunit C                                                                                                            |
| 3289                     | Q9HON5           | 4                    | 9              | 41.5                  | 130    | 14365  | 9.1  | Pterin-4-alpha-carbinolamine dehydratase 2                                                                                        |
| 3290                     | P63220           | 4                    | 85             | 41                    | 83     | 9111   | 8.5  | 40S ribosomal protein S21                                                                                                         |
| 3291                     | P49789           | 4                    | 4              | 40.1                  | 147    | 16858  | 7.1  | Bis(5'-adenosyl)-triphosphatase                                                                                                   |
| 3292                     | P49458           | 4                    | 10             | 39.5                  | 86     | 10112  | 8    | Signal recognition particle 9 kDa protein                                                                                         |
| 3293                     | P14621           | 4                    | 5              | 39.4                  | 99     | 11140  | 9.5  | Acylphosphatase-2                                                                                                                 |
| 3294                     | Q3KRA6           | 4                    | 7              | 38.9                  | 126    | 14609  | 6.9  | UPF0538 protein C2orf76                                                                                                           |
| 3295                     | P29034           | 4                    | 10             | 38.8                  | 98     | 11117  | 4.8  | Protein S100-A2                                                                                                                   |
| 3296                     | Q9BU02           | 4                    | 6              | 38.7                  | 230    | 25566  | 4.8  | Thiamine-triphosphatase                                                                                                           |
| 3297                     | Q96HC4           | 4                    | 29             | 38.4                  | 596    | 63945  | 8.2  | PDZ and LIM domain protein 5                                                                                                      |
| 3298                     | P41134-2         | 4                    | 7              | 39.6                  | 149    | 15586  | 7.8  | Isoform ID-B of DNA-binding protein inhibitor ID-1                                                                                |
| 3298                     | P41134           | 4                    | 7              | 38.1                  | 155    | 16132  | 7    | DNA-binding protein inhibitor ID-1                                                                                                |
| 3299                     | O00264           | 4                    | 7              | 37.9                  | 195    | 21671  | 4.7  | Membrane-associated progesterone receptor component 1                                                                             |
| 3300                     | Q9NYJ1           | 4                    | 8              | 37.9                  | 87     | 10134  | 6    | Coiled-coil-helix-coiled-coil-helix domain-containing protein 8                                                                   |

Table S1. Proteins identified in the OVCAR-3 tumor supernatant by two or more unique peptides.

| Protein or Protein Group | Accession Number | Unique Peptide Count | Spectrum Count | Sequence Coverage (%) | Length | MolWt | pI   | Descriptive Name                                                                                       |
|--------------------------|------------------|----------------------|----------------|-----------------------|--------|-------|------|--------------------------------------------------------------------------------------------------------|
| 3301                     | O75817           | 4                    | 7              | 37.1                  | 140    | 15651 | 8.9  | Ribonuclease P protein subunit p20                                                                     |
| 3302                     | Q6IBA3           | 4                    | 14             | 39.7                  | 68     | 7388  | 7.2  | ATOX1 protein                                                                                          |
| 3302                     | O00244           | 4                    | 14             | 39.7                  | 68     | 7402  | 7.2  | Copper transport protein ATOX1                                                                         |
| 3302                     | E5RIM7           | 4                    | 14             | 37                    | 73     | 7874  | 7.2  | Uncharacterized protein                                                                                |
| 3303                     | Q8WWX9           | 4                    | 5              | 35.9                  | 145    | 16082 | 5.5  | Selenoprotein M                                                                                        |
| 3303                     | UPI0000D62134    | 4                    | 5              | 35.9                  | 145    | 16134 | 5.6  | Thioredoxin-like selenoprotein M precursor (Protein SelM).                                             |
| 3304                     | Q9NWW6           | 4                    | 4              | 34.7                  | 199    | 23193 | 4.9  | Nicotinamide riboside kinase 1                                                                         |
| 3305                     | Q548C9           | 4                    | 5              | 34.3                  | 429    | 49167 | 6.8  | Septin 6                                                                                               |
| 3305                     | B1AMS2           | 4                    | 5              | 34.1                  | 431    | 49303 | 6.8  | Septin 6                                                                                               |
| 3305                     | Q14141           | 4                    | 5              | 33.9                  | 434    | 49717 | 6.7  | Septin-6                                                                                               |
| 3305                     | Q6B514           | 4                    | 5              | 33.6                  | 438    | 50204 | 6.9  | Septin 6 isoform E                                                                                     |
| 3305                     | E7ETH8           | 4                    | 5              | 32.2                  | 457    | 52236 | 7.2  | Uncharacterized protein                                                                                |
| 3305                     | B4DZW0           | 4                    | 5              | 32.2                  | 457    | 52184 | 7.3  | cDNA FLJ58821, highly similar to Septin-6                                                              |
| 3305                     | Q8NFH9           | 4                    | 5              | 26.3                  | 559    | 63143 | 8    | MLL/SEPTIN6 fusion protein (Fragment)                                                                  |
| 3306                     | Q96FN9           | 4                    | 5              | 33.9                  | 168    | 18660 | 7.8  | Probable D-tyrosyl-tRNA(Tyr) deacylase 2                                                               |
| 3307                     | Q9Y343           | 4                    | 11             | 40.2                  | 169    | 19818 | 7.2  | Sorting nexin-24                                                                                       |
| 3307                     | A8MXB7           | 4                    | 11             | 33.7                  | 202    | 23728 | 7.3  | Uncharacterized protein                                                                                |
| 3308                     | O43924           | 4                    | 4              | 33.3                  | 150    | 17420 | 5.7  | Retinal rod rhodopsin-sensitive cGMP 3',5'-cyclic phosphodiesterase subunit delta                      |
| 3309                     | P54725           | 4                    | 9              | 33.1                  | 363    | 39609 | 4.6  | UV excision repair protein RAD23 log A                                                                 |
| 3309                     | Q59EU8           | 4                    | 9              | 31.7                  | 379    | 41256 | 4.7  | UV excision repair protein RAD23 log A variant (Fragment)                                              |
| 3310                     | Q14011           | 4                    | 81             | 33.1                  | 172    | 18648 | 9.5  | Cold-inducible RNA-binding protein                                                                     |
| 3311                     | Q969E8           | 4                    | 8              | 33                    | 191    | 20894 | 4.4  | Pre-rRNA-processing protein TSR2 log                                                                   |
| 3312                     | Q8WUD4           | 4                    | 8              | 31.9                  | 166    | 19181 | 7.4  | Coiled-coil domain-containing protein 12                                                               |
| 3313                     | Q53G08           | 4                    | 7              | 31.4                  | 185    | 21370 | 5.6  | DNA replication complex GINS protein PSF2 variant (Fragment)                                           |
| 3313                     | Q9Y248           | 4                    | 7              | 31.4                  | 185    | 21428 | 5.4  | DNA replication complex GINS protein PSF2                                                              |
| 3314                     | Q3MHL6           | 4                    | 7              | 31.2                  | 144    | 15680 | 5.2  | TSC22 domain family protein 1                                                                          |
| 3315                     | Q9UBK9           | 4                    | 8              | 31.2                  | 157    | 18246 | 7.6  | Protein UXT                                                                                            |
| 3316                     | Q9UMX5           | 4                    | 5              | 30.8                  | 172    | 18856 | 5.7  | Neudesin                                                                                               |
| 3317                     | P51571           | 4                    | 6              | 30.6                  | 173    | 18999 | 6.2  | Translocon-associated protein subunit delta                                                            |
| 3317                     | UPI0000211CBA    | 4                    | 6              | 28.8                  | 184    | 20213 | 5.8  | translocon-associated protein subunit delta isoform 1 precursor                                        |
| 3318                     | Q99470           | 4                    | 8              | 30.3                  | 211    | 23026 | 7.3  | Stromal cell-derived factor 2                                                                          |
| 3319                     | E9PNW4           | 4                    | 25             | 29.6                  | 108    | 11985 | 5.8  | Uncharacterized protein                                                                                |
| 3319                     | P13987           | 4                    | 25             | 25                    | 128    | 14177 | 6.5  | CD59 glycoprotein                                                                                      |
| 3319                     | E9PR17           | 4                    | 25             | 24.6                  | 130    | 14529 | 7.8  | Uncharacterized protein                                                                                |
| 3320                     | O43805           | 4                    | 15             | 29.4                  | 119    | 13596 | 5.4  | Sjogren syndrome nuclear autoantigen 1                                                                 |
| 3321                     | Q8NBY1           | 4                    | 7              | 31.6                  | 392    | 43868 | 5.4  | Uncharacterized protein                                                                                |
| 3321                     | Q9P289           | 4                    | 7              | 29.8                  | 416    | 46529 | 5.3  | Serine/threonine-protein kinase MST4                                                                   |
| 3321                     | Q499L9           | 4                    | 7              | 29.8                  | 416    | 46530 | 5.2  | Serine/threonine protein kinase MST4                                                                   |
| 3321                     | E7ERH7           | 4                    | 7              | 29.1                  | 426    | 48010 | 5.6  | Uncharacterized protein                                                                                |
| 3322                     | Q9H446           | 4                    | 6              | 28.4                  | 243    | 27939 | 4.2  | RWD domain-containing protein 1                                                                        |
| 3323                     | D6RCL8           | 4                    | 6              | 27.7                  | 177    | 19171 | 9.3  | Uncharacterized protein                                                                                |
| 3323                     | Q9NY12-2         | 4                    | 6              | 24.6                  | 199    | 20834 | 10.4 | Isoform 2 of H/ACA ribonucleoprotein complex subunit 1                                                 |
| 3323                     | Q9NY12           | 4                    | 6              | 22.6                  | 217    | 22348 | 10.9 | H/ACA ribonucleoprotein complex subunit 1                                                              |
| 3324                     | UPI0000159292    | 4                    | 10             | 27.6                  | 123    | 14234 | 11.5 | UPI0000159292 UniRef100 entry                                                                          |
| 3325                     | A8JZY6           | 4                    | 7              | 27.1                  | 284    | 31580 | 5.3  | cDNA FLJ76983, highly similar to sapiens DPH5 log (S. cerevisiae), mRNA                                |
| 3325                     | E7EN60           | 4                    | 7              | 27.1                  | 284    | 31515 | 5.4  | Diphthine synthase                                                                                     |
| 3325                     | Q9H2P9-4         | 4                    | 7              | 27                    | 285    | 31440 | 5.3  | Isoform 4 of Diphthine synthase                                                                        |
| 3325                     | Q9H2P9           | 4                    | 7              | 27                    | 285    | 31651 | 5.3  | Diphthine synthase                                                                                     |
| 3325                     | Q9H2P9-5         | 4                    | 7              | 25.9                  | 297    | 33005 | 5.5  | Isoform 5 of Diphthine synthase                                                                        |
| 3325                     | E7EQB6           | 4                    | 7              | 25.9                  | 297    | 32906 | 5.4  | Uncharacterized protein                                                                                |
| 3326                     | P30042-2         | 4                    | 8              | 30.4                  | 237    | 24758 | 8.1  | Isoform Short of ES1 protein log, mitochondrial                                                        |
| 3326                     | UPI0000E5A400    | 4                    | 8              | 28                    | 257    | 27449 | 7.1  | UPI0000E5A400 UniRef100 entry                                                                          |
| 3326                     | P30042           | 4                    | 8              | 26.9                  | 268    | 28170 | 8.3  | ES1 protein log, mitochondrial                                                                         |
| 3327                     | P80723           | 4                    | 4              | 26.9                  | 227    | 22693 | 4.6  | Brain acid soluble protein 1                                                                           |
| 3328                     | Q8N5M4           | 4                    | 11             | 26.9                  | 171    | 20013 | 8.9  | Tetratricopeptide repeat protein 9C                                                                    |
| 3328                     | UPI0001796E42    | 4                    | 11             | 26.9                  | 171    | 19984 | 9.2  | PREDICTED: similar to tetratricopeptide repeat domain 9C                                               |
| 3329                     | UPI0001AE6C7C    | 4                    | 5              | 29                    | 217    | 25075 | 7.4  | UPI0001AE6C7C UniRef100 entry                                                                          |
| 3329                     | Q86UY6           | 4                    | 5              | 26.6                  | 237    | 27194 | 7.4  | N-alpha-acetyltransferase 40, NatD catalytic subunit                                                   |
| 3330                     | P03973           | 4                    | 23             | 26.5                  | 132    | 14326 | 8.7  | Antileukoprotease                                                                                      |
| 3331                     | A8K8D3           | 4                    | 7              | 26.4                  | 212    | 24062 | 6    | cDNA FLJ77372, highly similar to sapiens SUMO/sentrin specific peptidase family member 8 (SENp8), mRNA |
| 3331                     | Q96LD8           | 4                    | 7              | 26.4                  | 212    | 24107 | 6    | Sentrin-specific protease 8                                                                            |
| 3332                     | Q8WUX2           | 4                    | 5              | 26.1                  | 184    | 20875 | 5.4  | Cation transport regulator-like protein 2                                                              |
| 3333                     | O15217           | 4                    | 5              | 25.7                  | 222    | 25704 | 8.3  | Glutathione S-transferase A4                                                                           |
| 3334                     | Q9NSI2-2         | 4                    | 4              | 27.4                  | 215    | 23945 | 10.9 | Isoform B of Uncharacterized protein C21orf70                                                          |
| 3334                     | Q9NSI2           | 4                    | 4              | 25.7                  | 230    | 25456 | 11.1 | Uncharacterized protein C21orf70                                                                       |
| 3335                     | Q9UFW8           | 4                    | 11             | 25.7                  | 167    | 18820 | 9    | CGG triplet repeat-binding protein 1                                                                   |
| 3336                     | P52298           | 4                    | 5              | 25.6                  | 156    | 18001 | 8.2  | Nuclear cap-binding protein subunit 2                                                                  |
| 3337                     | Q5T8T7           | 4                    | 7              | 38.1                  | 134    | 15855 | 4.9  | Mediator complex subunit 22                                                                            |
| 3337                     | Q15528-2         | 4                    | 7              | 36.4                  | 140    | 16480 | 5    | Isoform Surf5A of Mediator of RNA polymerase II transcription subunit 22                               |
| 3337                     | Q15528           | 4                    | 7              | 25.5                  | 200    | 22221 | 4.7  | Mediator of RNA polymerase II transcription subunit 22                                                 |
| 3338                     | B5MBZ5           | 4                    | 6              | 25.1                  | 362    | 40957 | 5    | Uncharacterized protein                                                                                |
| 3338                     | Q9HCN4           | 4                    | 6              | 24.3                  | 374    | 41740 | 4.9  | GPN-loop GTPase 1                                                                                      |
| 3339                     | Q8TDH9           | 4                    | 6              | 25.1                  | 187    | 21609 | 7.6  | Protein Muted log                                                                                      |
| 3340                     | Q96H79           | 4                    | 6              | 25                    | 300    | 32962 | 8.1  | Zinc finger CCCH-type antiviral protein 1-like                                                         |
| 3341                     | A2TDT2           | 4                    | 6              | 24.8                  | 157    | 18221 | 6.5  | Mutant B-cell CLL/lymphoma 10                                                                          |
| 3342                     | P31431           | 4                    | 16             | 24.7                  | 198    | 21642 | 4.5  | Syndecan-4                                                                                             |
| 3343                     | E9PJK1           | 4                    | 10             | 40.6                  | 165    | 17963 | 5    | Uncharacterized protein                                                                                |
| 3343                     | E9PRJ8           | 4                    | 10             | 32.1                  | 209    | 22516 | 6.2  | Uncharacterized protein                                                                                |
| 3343                     | UPI0001F784A9    | 4                    | 10             | 30.3                  | 221    | 23797 | 6.7  | UPI0001F784A9 UniRef100 entry                                                                          |
| 3343                     | UPI00001F9AFE    | 4                    | 10             | 29.8                  | 225    | 24440 | 5.5  | UPI00001F9AFE UniRef100 entry                                                                          |
| 3343                     | P60033           | 4                    | 10             | 28.4                  | 236    | 25809 | 5.3  | CD81 antigen                                                                                           |
| 3343                     | E9PIF1           | 4                    | 10             | 27.7                  | 242    | 25903 | 5.3  | Uncharacterized protein                                                                                |
| 3343                     | A6NMH8           | 4                    | 10             | 24.5                  | 274    | 29806 | 6.9  | Uncharacterized protein                                                                                |
| 3344                     | Q9Y3D6           | 4                    | 23             | 24.3                  | 152    | 16938 | 8.8  | Mitochondrial fission 1 protein                                                                        |
| 3345                     | B7ZL15           | 4                    | 6              | 23.8                  | 349    | 37328 | 7.7  | Family with sequence similarity 98, member C                                                           |
| 3345                     | Q17RN3           | 4                    | 6              | 23.8                  | 349    | 37329 | 7.2  | Protein FAM98C                                                                                         |
| 3346                     | P23610           | 4                    | 7              | 23.7                  | 371    | 39103 | 6.8  | Factor VIII intron 22 protein                                                                          |
| 3347                     | P20962           | 4                    | 17             | 23.5                  | 102    | 11530 | 4.2  | Parathyromin                                                                                           |
| 3348                     | P00813           | 4                    | 5              | 23.4                  | 363    | 40764 | 5.9  | Adenosine deaminase                                                                                    |
| 3349                     | E9PD43           | 4                    | 12             | 26.2                  | 260    | 30064 | 9.9  | Uncharacterized protein                                                                                |
| 3349                     | A2ABK2           | 4                    | 12             | 23.1                  | 294    | 33708 | 9.7  | RD RNA binding protein (Fragment)                                                                      |
| 3349                     | B7Z6T4           | 4                    | 12             | 20.2                  | 336    | 38398 | 9.3  | RD RNA binding protein, isoform CRA_a                                                                  |
| 3349                     | E9PCL7           | 4                    | 12             | 18.1                  | 375    | 42732 | 9.3  | Uncharacterized protein                                                                                |
| 3349                     | P18615           | 4                    | 12             | 17.9                  | 380    | 43240 | 9.3  | Negative elongation factor E                                                                           |
| 3350                     | Q95685           | 4                    | 4              | 23.1                  | 299    | 32559 | 8.1  | Protein phosphatase 1 regulatory subunit 3D                                                            |
| 3350                     | Q86X09           | 4                    | 4              | 23.1                  | 299    | 32559 | 8.1  | Protein phosphatase 1, regulatory (Inhibitor) subunit 3D                                               |
| 3351                     | Q8NC96           | 4                    | 5              | 22.9                  | 275    | 29737 | 6.8  | Adaptin ear-binding coat-associated protein 1                                                          |
| 3352                     | Q8WXD5           | 4                    | 10             | 22.8                  | 167    | 18824 | 5.1  | Gem-associated protein 6                                                                               |
| 3353                     | Q9H9H4           | 4                    | 6              | 22.8                  | 285    | 31307 | 7.3  | Vacuolar protein sorting-associated protein 37B                                                        |

Table S1. Proteins identified in the OVCAR-3 tumor supernatant by two or more unique peptides.

| Protein or Protein Group | Accession Number | Unique Peptide Count | Spectrum Count | Sequence Coverage (%) | Length | MolWt  | pI   | Descriptive Name                                                                                                       |
|--------------------------|------------------|----------------------|----------------|-----------------------|--------|--------|------|------------------------------------------------------------------------------------------------------------------------|
| 3354                     | Q6P2C8-2         | 4                    | 4              | 25.1                  | 275    | 31351  | 9.2  | Isoform 2 of Mediator of RNA polymerase II transcription subunit 27                                                    |
| 3354                     | Q6P2C8           | 4                    | 4              | 22.2                  | 311    | 35432  | 9.3  | Mediator of RNA polymerase II transcription subunit 27                                                                 |
| 3355                     | Q9BS40           | 4                    | 7              | 22.1                  | 222    | 25750  | 5.8  | Latexin                                                                                                                |
| 3356                     | A6NNP0           | 4                    | 4              | 22                    | 264    | 29540  | 4.4  | Uncharacterized protein                                                                                                |
| 3356                     | Q9UK22           | 4                    | 4              | 19.6                  | 296    | 33328  | 4.4  | F-box only protein 2                                                                                                   |
| 3356                     | C9JQC5           | 4                    | 4              | 19.4                  | 299    | 33493  | 4.4  | Uncharacterized protein                                                                                                |
| 3357                     | B3KY43           | 4                    | 4              | 22                    | 405    | 44867  | 5.2  | cDNA FLJ46798 fis, clone TRACH3031660, highly similar to cAMP-dependent protein kinase type II-beta regulatory subunit |
| 3357                     | Q6DHZ2           | 4                    | 4              | 21.3                  | 418    | 46348  | 4.9  | Protein kinase, cAMP-dependent, regulatory, type II, beta                                                              |
| 3357                     | P31323           | 4                    | 4              | 21.3                  | 418    | 46302  | 4.9  | cAMP-dependent protein kinase type II-beta regulatory subunit                                                          |
| 3358                     | Q9H3Q1           | 4                    | 7              | 21.9                  | 356    | 37980  | 5.2  | Cdc42 effector protein 4                                                                                               |
| 3359                     | Q8NB15-2         | 4                    | 6              | 22.6                  | 252    | 28265  | 7.7  | Isoform 2 of Zinc finger protein 511                                                                                   |
| 3359                     | Q8NB15           | 4                    | 6              | 21.8                  | 262    | 29428  | 6.8  | Zinc finger protein 511                                                                                                |
| 3360                     | P15328           | 4                    | 7              | 21.4                  | 257    | 29819  | 8    | Folate receptor alpha                                                                                                  |
| 3361                     | Q81YL3           | 4                    | 18             | 21.4                  | 243    | 25977  | 6.9  | UPF0688 protein C1orf174                                                                                               |
| 3362                     | P24593           | 4                    | 5              | 21.3                  | 272    | 30570  | 8.2  | Insulin-like growth factor-binding protein 5                                                                           |
| 3363                     | Q70IA6-2         | 4                    | 5              | 24.6                  | 142    | 16500  | 6.3  | Isoform 2 of Mps one binder kinase activator-like 2                                                                    |
| 3363                     | B4DKJ9           | 4                    | 5              | 21.1                  | 166    | 19497  | 7.8  | cDNA FLJ60639, highly similar to Mps one binder kinase activator-like 2                                                |
| 3363                     | Q70IA6           | 4                    | 5              | 14.8                  | 237    | 26927  | 6.8  | Mps one binder kinase activator-like 2                                                                                 |
| 3363                     | E9PDA5           | 4                    | 5              | 13.1                  | 268    | 30174  | 7.1  | Uncharacterized protein                                                                                                |
| 3363                     | B4DKP3           | 4                    | 5              | 13.1                  | 268    | 30158  | 7.1  | cDNA FLJ56351, highly similar to Mps one binder kinase activator-like 2                                                |
| 3364                     | B3KTJ1           | 4                    | 5              | 21                    | 291    | 33048  | 7.4  | like protein                                                                                                           |
| 3364                     | Q9Y365           | 4                    | 5              | 21                    | 291    | 33049  | 7.1  | PCTP-like protein                                                                                                      |
| 3365                     | P49755           | 4                    | 8              | 21                    | 219    | 24976  | 7.5  | Transmembrane emp24 domain-containing protein 10                                                                       |
| 3365                     | Q53GF9           | 4                    | 8              | 20.4                  | 225    | 25637  | 6.7  | Full-length cDNA 5-PRIME end of clone CS0DF013YM24 of Fetal brain of sapiens (Human) variant (Fragment)                |
| 3366                     | Q9Y3Y2-4         | 4                    | 19             | 25.7                  | 202    | 21918  | 12   | Isoform 3 of Friend of PRMT1 protein                                                                                   |
| 3366                     | Q9Y3Y2           | 4                    | 19             | 21                    | 248    | 26397  | 12.2 | Friend of PRMT1 protein                                                                                                |
| 3366                     | Q9Y3Y2-3         | 4                    | 19             | 20.9                  | 249    | 26525  | 12.2 | Isoform 2 of Friend of PRMT1 protein                                                                                   |
| 3367                     | Q60671           | 4                    | 5              | 20.9                  | 282    | 31827  | 4.8  | Cell cycle checkpoint protein RAD1                                                                                     |
| 3368                     | Q5JPI3           | 4                    | 6              | 20.7                  | 329    | 37541  | 6.5  | Uncharacterized protein C3orf38                                                                                        |
| 3369                     | Q8N9N7           | 4                    | 4              | 20.5                  | 239    | 26754  | 8.4  | Leucine-rich repeat-containing protein 57                                                                              |
| 3370                     | Q8TCF1           | 4                    | 7              | 20.5                  | 268    | 30787  | 7.4  | AN1-type zinc finger protein 1                                                                                         |
| 3371                     | Q5TA50           | 4                    | 10             | 20.1                  | 214    | 24365  | 7.2  | Glycolipid transfer protein domain-containing protein 1                                                                |
| 3372                     | Q9BT09           | 4                    | 6              | 19.8                  | 278    | 30748  | 5.5  | Protein canopy log 3                                                                                                   |
| 3373                     | Q9NWX6           | 4                    | 4              | 19.8                  | 298    | 34831  | 8    | Probable tRNA(His) guanylyltransferase                                                                                 |
| 3374                     | T20933           | 4                    | 11             | 19.7                  | 346    | 37208  | 6.3  | N(4)-(beta-N-acetylglucosaminy)-L-asparaginase                                                                         |
| 3375                     | Q9HBL8           | 4                    | 4              | 19.7                  | 299    | 33344  | 7.5  | NmrA-like family domain-containing protein 1                                                                           |
| 3376                     | Q9POM6           | 4                    | 5              | 19.4                  | 372    | 40058  | 9.7  | Core histone macro-H2A.2                                                                                               |
| 3377                     | Q43752           | 4                    | 9              | 19.2                  | 255    | 29176  | 4.9  | Syntaxin-6                                                                                                             |
| 3378                     | B4DW81           | 4                    | 5              | 18.9                  | 227    | 26181  | 9    | cDNA FLJ58863, highly similar to Protein NipSnap3A                                                                     |
| 3378                     | Q9UFN0           | 4                    | 5              | 17.4                  | 247    | 28467  | 9.2  | Protein NipSnap log 3A                                                                                                 |
| 3379                     | E9PJE5           | 4                    | 4              | 22.1                  | 240    | 26458  | 7.5  | Uncharacterized protein                                                                                                |
| 3379                     | Q17R31           | 4                    | 4              | 19.3                  | 274    | 30333  | 7.2  | Putative deoxyribonuclease TATDN3                                                                                      |
| 3379                     | B7Z1C1           | 4                    | 4              | 18.9                  | 281    | 31180  | 7.5  | cDNA FLJ52692                                                                                                          |
| 3379                     | UPI0000205E43    | 4                    | 4              | 18.9                  | 281    | 31122  | 7.5  | putative deoxyribonuclease TATDN3 isoform 5                                                                            |
| 3380                     | B3KP90           | 4                    | 4              | 18.8                  | 479    | 52710  | 5.1  | cDNA FLJ31447 fis, clone NT2NE2000913, highly similar to Protein phosphatase 2C isoform beta (EC 3.1.3.16)             |
| 3380                     | O75688           | 4                    | 4              | 18.8                  | 479    | 52643  | 5    | Protein phosphatase 1B                                                                                                 |
| 3381                     | A2A2L5           | 4                    | 16             | 18.4                  | 277    | 31152  | 8.5  | Chromosome 20 open reading frame 43 (Fragment)                                                                         |
| 3381                     | Q9BY42           | 4                    | 16             | 16.7                  | 306    | 33887  | 8.6  | UPF0549 protein C20orf43                                                                                               |
| 3381                     | B2RB99           | 4                    | 16             | 16.7                  | 306    | 33798  | 8.6  | cDNA, FLJ95387                                                                                                         |
| 3381                     | B4DXL5           | 4                    | 16             | 15.2                  | 336    | 37500  | 8.4  | cDNA FLJ52798                                                                                                          |
| 3381                     | A8MSH5           | 4                    | 16             | 15.2                  | 336    | 37532  | 8.4  | Uncharacterized protein                                                                                                |
| 3382                     | Q16637-4         | 4                    | 4              | 21.2                  | 250    | 27135  | 5.2  | Isoform SMN-delta57 of Survival motor neuron protein                                                                   |
| 3382                     | Q16637-2         | 4                    | 4              | 20.2                  | 262    | 28534  | 6    | Isoform SMN-delta5 of Survival motor neuron protein                                                                    |
| 3382                     | Q16637-3         | 4                    | 4              | 18.8                  | 282    | 30450  | 5.5  | Isoform SMN-delta7 of Survival motor neuron protein                                                                    |
| 3382                     | E7EQZ4           | 4                    | 4              | 18                    | 294    | 31690  | 5.7  | Uncharacterized protein                                                                                                |
| 3382                     | Q16637           | 4                    | 4              | 18                    | 294    | 31849  | 6.5  | Survival motor neuron protein                                                                                          |
| 3383                     | Q43291           | 4                    | 9              | 17.9                  | 252    | 28228  | 8.3  | Kunitz-type protease inhibitor 2                                                                                       |
| 3383                     | Q6LEU8           | 4                    | 9              | 17.9                  | 252    | 28237  | 8.3  | SPINT2 protein (Fragment)                                                                                              |
| 3384                     | B4DTN4           | 4                    | 5              | 17.8                  | 258    | 27602  | 8    | cDNA FLJ58857, highly similar to N6-adenosine-methyltransferase 70 kDa subunit (EC 2.1.1.62)                           |
| 3384                     | B4E2F6           | 4                    | 5              | 15.1                  | 305    | 33149  | 7    | cDNA FLJ61069, highly similar to N6-adenosine-methyltransferase 70 kDa subunit(EC 2.1.1.62)                            |
| 3384                     | Q86U44           | 4                    | 5              | 7.9                   | 580    | 64474  | 6.4  | N6-adenosine-methyltransferase 70 kDa subunit                                                                          |
| 3385                     | A5YRU8           | 4                    | 30             | 20.6                  | 243    | 26485  | 6.2  | MUC1 isoform T8                                                                                                        |
| 3385                     | Q0VAP6           | 4                    | 30             | 19.6                  | 255    | 27566  | 6.4  | HCG1996357, isoform CRA_f                                                                                              |
| 3385                     | B6ECA1           | 4                    | 30             | 19.3                  | 259    | 28297  | 6.7  | MUC1 isoform J13                                                                                                       |
| 3385                     | Q0VAP5           | 4                    | 30             | 18.9                  | 264    | 28405  | 6.7  | Mucin 1, cell surface associated                                                                                       |
| 3385                     | B6ECA3           | 4                    | 30             | 18.7                  | 268    | 29549  | 7.1  | MUC1 isoform J14                                                                                                       |
| 3385                     | A6ZID5           | 4                    | 30             | 18.5                  | 270    | 29249  | 6.5  | MUC1 isoform M2                                                                                                        |
| 3385                     | B1AVR0           | 4                    | 30             | 18.3                  | 273    | 29592  | 6.5  | HCG1996357, isoform CRA_j                                                                                              |
| 3385                     | A5YRU5           | 4                    | 30             | 17.7                  | 282    | 30431  | 6.8  | MUC1 isoform Z-LSP                                                                                                     |
| 3385                     | B1AVQ5           | 4                    | 30             | 10.5                  | 475    | 49224  | 6.9  | Mucin 1, cell surface associated                                                                                       |
| 3385                     | UPI000059C524    | 4                    | 30             | 10.3                  | 484    | 50063  | 7    | mucin-1 isoform 10 precursor                                                                                           |
| 3385                     | E7EUW3           | 4                    | 30             | 8.9                   | 561    | 57285  | 7.1  | Uncharacterized protein                                                                                                |
| 3385                     | B4DWK6           | 4                    | 30             | 8.9                   | 561    | 57226  | 7    | cDNA FLJ60927, highly similar to Mucin-1                                                                               |
| 3385                     | P15941-4         | 4                    | 30             | 4                     | 1243   | 121021 | 7.5  | Isoform 4 of Mucin-1                                                                                                   |
| 3385                     | P15941-3         | 4                    | 30             | 4                     | 1252   | 121803 | 7.5  | Isoform 3 of Mucin-1                                                                                                   |
| 3385                     | P15941-2         | 4                    | 30             | 4                     | 1264   | 122941 | 7.6  | Isoform 2 of Mucin-1                                                                                                   |
| 3385                     | P15941           | 4                    | 30             | 4                     | 1255   | 122102 | 7.5  | Mucin-1                                                                                                                |
| 3386                     | C9IYN7           | 4                    | 7              | 24.4                  | 193    | 21674  | 6.4  | Uncharacterized protein                                                                                                |
| 3386                     | E9PFB3           | 4                    | 7              | 19.4                  | 242    | 27155  | 6.4  | Uncharacterized protein                                                                                                |
| 3386                     | B4DP60           | 4                    | 7              | 19.4                  | 242    | 27125  | 6.4  | cDNA FLJ54324                                                                                                          |
| 3386                     | A8MQ59           | 4                    | 7              | 17.7                  | 266    | 29885  | 6.8  | Uncharacterized protein                                                                                                |
| 3386                     | Q0PNE2           | 4                    | 7              | 17.7                  | 266    | 29793  | 6.8  | UPF0405 protein C3orf75                                                                                                |
| 3387                     | Q95229           | 4                    | 5              | 17.7                  | 277    | 31293  | 5.2  | ZW10 interactor                                                                                                        |
| 3388                     | B4DYD9           | 4                    | 11             | 19.3                  | 322    | 35264  | 5.2  | cDNA FLJ61465, highly similar to sapiens vacuolar protein sorting 37C (VPS37C), mRNA                                   |
| 3388                     | A5D8V6           | 4                    | 11             | 17.5                  | 355    | 38659  | 5.2  | Vacuolar protein sorting-associated protein 37C                                                                        |
| 3389                     | B4DXU3           | 4                    | 9              | 17.5                  | 268    | 30193  | 9.2  | cDNA FLJ54989, highly similar to Mitochondrial import receptor subunit TOM34                                           |
| 3389                     | Q15785           | 4                    | 9              | 15.2                  | 309    | 34559  | 9    | Mitochondrial import receptor subunit TOM34                                                                            |
| 3390                     | P29084           | 4                    | 7              | 17.2                  | 291    | 33044  | 9    | Transcription initiation factor IIE subunit beta                                                                       |
| 3391                     | Q9Y303           | 4                    | 6              | 16.9                  | 409    | 43748  | 6.7  | Putative N-acetylglucosamine-6-phosphate deacetylase                                                                   |
| 3391                     | Q9Y303-2         | 4                    | 6              | 15.7                  | 439    | 46913  | 6.7  | Isoform 2 of Putative N-acetylglucosamine-6-phosphate deacetylase                                                      |

Table S1. Proteins identified in the OVCAR-3 tumor supernatant by two or more unique peptides.

| Protein or Protein Group | Accession Number | Unique Peptide Count | Spectrum Count | Sequence Coverage (%) | Length | MolWt | pI  | Descriptive Name                                                                                                                            |
|--------------------------|------------------|----------------------|----------------|-----------------------|--------|-------|-----|---------------------------------------------------------------------------------------------------------------------------------------------|
| 3391                     | Q9Y303-3         | 4                    | 6              | 11.6                  | 594    | 63595 | 7.5 | Isoform 3 of Putative N-acetylglucosamine-6-phosphate deacetylase<br>cDNA FLJ58988, highly similar to Charged multivesicular body protein 3 |
| 3392                     | B4DG34           | 4                    | 9              | 16.7                  | 251    | 28386 | 4.8 | Isoform 2 of Sulfatase-modifying factor 2                                                                                                   |
| 3393                     | Q8NB7-2          | 4                    | 6              | 17.9                  | 213    | 24117 | 6.9 | Sulfatase-modifying factor 2                                                                                                                |
| 3393                     | Q8NB7            | 4                    | 6              | 16.9                  | 301    | 33843 | 8   | UPI0001AE7023 UniRef100 entry                                                                                                               |
| 3393                     | UPI0001AE7023    | 4                    | 6              | 16.9                  | 320    | 35923 | 9.2 | sulfatase-modifying factor 2 isoform b precursor                                                                                            |
| 3393                     | UPI0000EE7471    | 4                    | 6              | 16.7                  | 320    | 36937 | 9.2 | Uncharacterized protein                                                                                                                     |
| 3393                     | E7EMF9           | 4                    | 6              | 17.3                  | 323    | 36355 | 9.3 | Isoform p41 of 2'-5'-oligoadenylate synthase 1                                                                                              |
| 3394                     | P00973-2         | 4                    | 4              | 16.5                  | 364    | 41740 | 8.9 | Uncharacterized protein                                                                                                                     |
| 3394                     | E7EM19           | 4                    | 4              | 16.5                  | 381    | 43747 | 9.1 | Isoform p44 of 2'-5'-oligoadenylate synthase 1                                                                                              |
| 3394                     | P00973-4         | 4                    | 4              | 15.8                  | 382    | 43944 | 9.1 | 2'-5'-oligoadenylate synthase 1                                                                                                             |
| 3394                     | P00973           | 4                    | 4              | 15.2                  | 400    | 46029 | 8.2 | Isoform p48 of 2'-5'-oligoadenylate synthase 1                                                                                              |
| 3394                     | P00973-3         | 4                    | 4              | 13.7                  | 414    | 47408 | 8.9 | 2'-5' oligoadenylate synthetase 1 p52 isoform                                                                                               |
| 3394                     | Q3ZM02           | 4                    | 4              | 13.7                  | 459    | 52166 | 9.1 | Uncharacterized protein                                                                                                                     |
| 3394                     | E7ET41           | 4                    | 4              | 16.2                  | 459    | 52065 | 9   | Ephrin-B2                                                                                                                                   |
| 3395                     | P52799           | 4                    | 18             | 16.1                  | 333    | 36923 | 8.9 | Synaptogyrin-2                                                                                                                              |
| 3396                     | O43760           | 4                    | 16             | 13.1                  | 224    | 24810 | 4.9 | SYNGR2 protein                                                                                                                              |
| 3396                     | Q3KQZ2           | 4                    | 16             | 15.9                  | 275    | 30375 | 9.2 | cDNA, FLJ96597                                                                                                                              |
| 3397                     | B2RDG4           | 4                    | 6              | 12.5                  | 508    | 57433 | 8.8 | Pumilio domain-containing protein KIAA0020                                                                                                  |
| 3397                     | Q15397           | 4                    | 6              | 37.8                  | 648    | 73584 | 9.6 | Isoform 1 of Bcl-2-like protein 13                                                                                                          |
| 3398                     | Q9BXK5-2         | 4                    | 11             | 15.7                  | 201    | 22612 | 4.9 | Bcl-2-like protein 13                                                                                                                       |
| 3398                     | Q9BXK5           | 4                    | 11             | 15.7                  | 485    | 52723 | 4.4 | Dynactin subunit 4                                                                                                                          |
| 3399                     | Q9UJW0           | 4                    | 6              | 15.4                  | 460    | 52337 | 7.3 | dynactin subunit 4 isoform a                                                                                                                |
| 3399                     | UPI0000EE3766    | 4                    | 6              | 15.5                  | 467    | 53152 | 7.4 | DNA repair protein XRCC4                                                                                                                    |
| 3400                     | Q13426           | 4                    | 7              | 15.2                  | 336    | 38287 | 5   | cDNA FLJ60123, highly similar to Coiled-coil domain-containing protein 22                                                                   |
| 3401                     | B4DLA4           | 4                    | 5              | 9.3                   | 355    | 39319 | 8.4 | cDNA, FLJ79274, highly similar to Coiled-coil domain-containing protein 22                                                                  |
| 3401                     | B7ZAR0           | 4                    | 5              | 9.3                   | 580    | 65186 | 7.2 | cDNA FLJ56537, highly similar to Coiled-coil domain-containing protein 22                                                                   |
| 3401                     | B4DPB6           | 4                    | 5              | 8.6                   | 580    | 65156 | 7.2 | Coiled-coil domain-containing protein 22                                                                                                    |
| 3401                     | O60826           | 4                    | 5              | 17.8                  | 627    | 70756 | 6.8 | Isoform 2 of Uncharacterized protein C18orf25                                                                                               |
| 3402                     | Q96B23-2         | 4                    | 6              | 15.1                  | 342    | 36977 | 5.1 | Uncharacterized protein C18orf25                                                                                                            |
| 3402                     | Q96B23           | 4                    | 6              | 14.7                  | 403    | 43324 | 4.9 | Uncharacterized protein                                                                                                                     |
| 3403                     | C9JPO0           | 4                    | 15             | 13.1                  | 348    | 37899 | 8.7 | Muscleblind-like protein 1                                                                                                                  |
| 3403                     | Q9NR56           | 4                    | 15             | 14.2                  | 388    | 41817 | 8.9 | TOM1L1 protein                                                                                                                              |
| 3404                     | Q8N749           | 4                    | 6              | 14.3                  | 346    | 38713 | 5.7 | cDNA FLJ58664, highly similar to TOM1-like protein 1                                                                                        |
| 3404                     | B4E1N0           | 4                    | 6              | 14.1                  | 469    | 52214 | 5.4 | TOM1-like protein 1                                                                                                                         |
| 3404                     | O75674           | 4                    | 6              | 14.2                  | 476    | 52989 | 5.2 | Adenylosuccinate synthetase isozyme 1                                                                                                       |
| 3405                     | Q8N142           | 4                    | 5              | 14.2                  | 457    | 50208 | 8.6 | Poliovirus receptor-related protein 3                                                                                                       |
| 3406                     | Q9NQS3           | 4                    | 7              | 13.9                  | 549    | 61003 | 6.2 | cDNA FLJ38675 fis, clone IMR322000243, highly similar to Nucleoporin Nup43                                                                  |
| 3407                     | B3KTT0           | 4                    | 6              | 13.9                  | 380    | 42152 | 5.5 | Nucleoporin Nup43                                                                                                                           |
| 3407                     | Q8NFH3           | 4                    | 6              | 12                    | 380    | 42151 | 5.6 | UPI0000458924 UniRef100 entry                                                                                                               |
| 3407                     | UPI0000458924    | 4                    | 6              | 16.3                  | 441    | 48485 | 6.2 | ribonuclease H2 subunit B isoform 2                                                                                                         |
| 3408                     | UPI0000D4DA79    | 4                    | 7              | 13.6                  | 257    | 29004 | 8.8 | RNA5EH2B protein (Fragment)                                                                                                                 |
| 3408                     | Q05DR2           | 4                    | 7              | 13.5                  | 302    | 34755 | 9.1 | Ribonuclease H2 subunit B                                                                                                                   |
| 3408                     | Q5TBB1           | 4                    | 7              | 12.7                  | 318    | 35139 | 9.1 | RNA5EH2B protein                                                                                                                            |
| 3408                     | Q8N451           | 4                    | 7              | 13.6                  | 331    | 37359 | 9.1 | Four and a half LIM domains protein 3                                                                                                       |
| 3409                     | Q13643           | 4                    | 6              | 13.6                  | 280    | 31192 | 6.2 | LIM-only protein FHL3                                                                                                                       |
| 3409                     | Q9P100           | 4                    | 6              | 13.5                  | 280    | 31282 | 6.2 | Uncharacterized protein C9orf78                                                                                                             |
| 3410                     | Q9NZ63           | 4                    | 8              | 13.3                  | 289    | 33688 | 6.7 | Uncharacterized protein                                                                                                                     |
| 3411                     | A6NKZ2           | 4                    | 6              | 12.9                  | 413    | 47066 | 6.4 | N-acetylglucosamine 2-epimerase                                                                                                             |
| 3411                     | P51606           | 4                    | 6              | 14.2                  | 427    | 48831 | 6.4 | UPI000066D90A UniRef100 entry                                                                                                               |
| 3412                     | UPI000066D90A    | 4                    | 4              | 13.3                  | 386    | 42656 | 4.7 | UPI000066D909 UniRef100 entry                                                                                                               |
| 3412                     | UPI000066D909    | 4                    | 4              | 13.2                  | 430    | 47642 | 4.7 | Zinc finger protein ZPR1                                                                                                                    |
| 3412                     | O75312           | 4                    | 4              | 13.2                  | 459    | 50925 | 4.7 | Uncharacterized protein                                                                                                                     |
| 3413                     | A8MW61           | 4                    | 6              | 13.2                  | 514    | 57182 | 9.2 | Pleiotropic regulator 1                                                                                                                     |
| 3413                     | O43660           | 4                    | 6              | 16.4                  | 514    | 57194 | 9.2 | Isoform 2 of Set1/Ash2 histone methyltransferase complex subunit ASH2                                                                       |
| 3414                     | Q9UBL3-2         | 4                    | 6              | 15.4                  | 501    | 56477 | 6.9 | Isoform 3 of Set1/Ash2 histone methyltransferase complex subunit ASH2                                                                       |
| 3414                     | Q9UBL3-3         | 4                    | 6              | 13.1                  | 534    | 60208 | 7   | cDNA FLJ75144, highly similar to sapiens ash2 (absent, small, or homeotic)-like (ASH2L), mRNA                                               |
| 3414                     | A8K6T5           | 4                    | 6              | 13.1                  | 628    | 68746 | 5.7 | Set1/Ash2 histone methyltransferase complex subunit ASH2                                                                                    |
| 3414                     | Q9UBL3           | 4                    | 6              | 16.9                  | 628    | 68723 | 5.7 | Apolipoprotein L2                                                                                                                           |
| 3415                     | Q9BQE5           | 4                    | 6              | 12.7                  | 337    | 37092 | 6.7 | cDNA FLJ55764, highly similar to Apolipoprotein-L2                                                                                          |
| 3415                     | B4E1T5           | 4                    | 6              | 12.7                  | 449    | 48885 | 6   | UPI0001AE62FE UniRef100 entry                                                                                                               |
| 3415                     | UPI0001AE62FE    | 4                    | 6              | 13.2                  | 449    | 48929 | 6   | Isoform 3 of G1/S-specific cyclin-E1                                                                                                        |
| 3416                     | P24864-3         | 4                    | 6              | 12.7                  | 395    | 45150 | 5.9 | G1/S-specific cyclin-E1                                                                                                                     |
| 3416                     | P24864           | 4                    | 6              | 12.5                  | 410    | 47077 | 6   | DNA/RNA-binding protein KIN17                                                                                                               |
| 3417                     | O60870           | 4                    | 7              | 12.4                  | 393    | 45374 | 9   | cDNA FLJ61415, highly similar to Protein kinase C and casein kinase substrate in neurons protein 3                                          |
| 3418                     | B4DUI2           | 4                    | 4              | 12.3                  | 421    | 48273 | 6.4 | Protein kinase C and casein kinase substrate in neurons protein 3                                                                           |
| 3418                     | Q9UKS6           | 4                    | 4              | 12.2                  | 424    | 48487 | 6.2 | Protein kinase C and casein kinase substrate in neurons 3, isoform CRA_b                                                                    |
| 3418                     | D3DOR0           | 4                    | 4              | 12.4                  | 425    | 48532 | 6.3 | Uncharacterized protein                                                                                                                     |
| 3419                     | C9JA77           | 4                    | 49             | 13.3                  | 355    | 38553 | 5   | Isoform 2 of Exocyst complex component 7                                                                                                    |
| 3420                     | Q9UPT5-2         | 4                    | 10             | 12.9                  | 653    | 74713 | 6.4 | EXOC7 splice variant 5                                                                                                                      |
| 3420                     | B8XXP2           | 4                    | 10             | 12.7                  | 676    | 77303 | 6.5 | Isoform 1 of Exocyst complex component 7                                                                                                    |
| 3420                     | Q9UPT5-1         | 4                    | 10             | 12.3                  | 684    | 78060 | 6.7 | EXOC7 splice variant 6                                                                                                                      |
| 3420                     | B5MC69           | 4                    | 10             | 11.8                  | 707    | 80650 | 6.8 | EXOC7 splice variant 6                                                                                                                      |
| 3420                     | Q9UPT5           | 4                    | 10             | 12.2                  | 735    | 83382 | 6.8 | Exocyst complex component 7                                                                                                                 |
| 3421                     | Q9H0C8           | 4                    | 15             | 12.2                  | 392    | 42907 | 7.1 | Integrin-linked kinase-associated serine/threonine phosphatase 2C                                                                           |
| 3422                     | Q9H814           | 4                    | 6              | 12.2                  | 394    | 44403 | 5.4 | Phosphorylated adapter RNA export protein                                                                                                   |
| 3423                     | B4E1M2           | 4                    | 7              | 13.2                  | 502    | 56629 | 6.3 | cDNA FLJ54951, highly similar to Epoxide hydrolase 2 (EC 3.3.2.3)                                                                           |
| 3423                     | E5RFU2           | 4                    | 7              | 12.4                  | 523    | 58856 | 6   | Uncharacterized protein                                                                                                                     |
| 3423                     | P34913           | 4                    | 7              | 12.1                  | 555    | 62616 | 6.3 | Epoxide hydrolase 2                                                                                                                         |
| 3423                     | B4DFE9           | 4                    | 7              | 12.1                  | 572    | 64731 | 6.5 | cDNA FLJ59619, highly similar to Epoxide hydrolase 2 (EC 3.3.2.3)                                                                           |
| 3423                     | E7ETW9           | 4                    | 7              | 17.9                  | 572    | 64701 | 6.7 | Uncharacterized protein                                                                                                                     |
| 3424                     | E7ENA3           | 4                    | 8              | 17.9                  | 385    | 41675 | 5.7 | Uncharacterized protein                                                                                                                     |
| 3424                     | B4DSE2           | 4                    | 8              | 17.9                  | 385    | 41676 | 5.5 | cDNA FLJ57277, highly similar to Tripeptidyl-peptidase 1 (EC 3.4.14.9)                                                                      |
| 3424                     | E7EV34           | 4                    | 8              | 13.9                  | 496    | 53828 | 6.4 | Uncharacterized protein                                                                                                                     |
| 3424                     | B4E0C7           | 4                    | 8              | 13.9                  | 496    | 53844 | 6.4 | cDNA FLJ58558, highly similar to Tripeptidyl-peptidase 1 (EC 3.4.14.9)                                                                      |
| 3424                     | B5MDC1           | 4                    | 8              | 12.4                  | 555    | 60369 | 6.4 | Uncharacterized protein                                                                                                                     |
| 3424                     | Q53HP2           | 4                    | 8              | 12.3                  | 563    | 61213 | 6.5 | Tripeptidyl-peptidase I variant (Fragment)                                                                                                  |

Table S1. Proteins identified in the OVCAR-3 tumor supernatant by two or more unique peptides.

| Protein or Group | Accession Number | Unique Peptide Count | Spectrum Count | Sequence Coverage (%) | Length | MolWt  | pI  | Descriptive Name                                                                                                                                              |
|------------------|------------------|----------------------|----------------|-----------------------|--------|--------|-----|---------------------------------------------------------------------------------------------------------------------------------------------------------------|
| 3424             | O14773           | 4                    | 8              | 12.3                  | 563    | 61248  | 6.5 | Tripeptidyl-peptidase 1<br>cDNA FLJ56402, highly similar to Tripeptidyl-peptidase 1 (EC 3.4.14.9)                                                             |
| 3424             | B4DIV8           | 4                    | 8              | 12.1                  | 572    | 62212  | 6.7 |                                                                                                                                                               |
| 3425             | Q5TZP9           | 4                    | 6              | 13.1                  | 396    | 44102  | 7.4 | Cyclin B1<br>cDNA FLJ75563, highly similar to sapiens cyclin B1 (CCNB1), mRNA                                                                                 |
| 3425             | A8K066           | 4                    | 6              | 12                    | 433    | 48237  | 7.8 |                                                                                                                                                               |
| 3425             | P14635           | 4                    | 6              | 12                    | 433    | 48337  | 7.5 | G2/mitotic-specific cyclin-B1                                                                                                                                 |
| 3426             | Q8TCB0           | 4                    | 4              | 11.9                  | 444    | 50491  | 6.9 | Interferon-induced protein 44                                                                                                                                 |
| 3427             | Q96CS3           | 4                    | 8              | 11.9                  | 445    | 52624  | 5.6 | FAS-associated factor 2                                                                                                                                       |
| 3428             | B4DTG6           | 4                    | 9              | 11.8                  | 422    | 46411  | 9.5 | cDNA FLJ54754, highly similar to Protein FAM61A                                                                                                               |
| 3428             | Q8ND56-2         | 4                    | 9              | 10.8                  | 463    | 50554  | 9.5 | Isoform 2 of Protein LSM14 log A                                                                                                                              |
| 3428             | Q8ND56           | 4                    | 9              | 10.8                  | 463    | 50530  | 9.5 | Protein LSM14 log A                                                                                                                                           |
| 3429             | P15529-7         | 4                    | 6              | 13.2                  | 355    | 39804  | 5.8 | Isoform L of Membrane cofactor protein                                                                                                                        |
| 3429             | P15529-6         | 4                    | 6              | 12.7                  | 370    | 41183  | 6   | Isoform J of Membrane cofactor protein                                                                                                                        |
| 3429             | P15529-4         | 4                    | 6              | 12.7                  | 369    | 41359  | 6.3 | Isoform F of Membrane cofactor protein                                                                                                                        |
| 3429             | P15529-5         | 4                    | 6              | 12.2                  | 385    | 42683  | 6.4 | Isoform H of Membrane cofactor protein                                                                                                                        |
| 3429             | P15529-3         | 4                    | 6              | 12.2                  | 384    | 42738  | 6.5 | Isoform D of Membrane cofactor protein                                                                                                                        |
| 3429             | P15529-2         | 4                    | 6              | 11.8                  | 399    | 44238  | 6.9 | Isoform B of Membrane cofactor protein                                                                                                                        |
| 3430             | A4PIV0           | 4                    | 8              | 12.5                  | 457    | 50106  | 6.2 | Fusion protein SYT-SSX2                                                                                                                                       |
| 3430             | A4PIV9           | 4                    | 8              | 11.7                  | 488    | 53819  | 5.8 | Fusion protein SYT-SSX2                                                                                                                                       |
| 3431             | Q9NVH1-3         | 4                    | 5              | 12                    | 507    | 57197  | 7.5 | Isoform 3 of DnaJ log subfamily C member 11<br>cDNA FLJ59729, highly similar to DnaJ log subfamily C member 11                                                |
| 3431             | B4DPK2           | 4                    | 5              | 11.7                  | 521    | 58842  | 9   |                                                                                                                                                               |
| 3431             | Q9NVH1           | 4                    | 5              | 10.9                  | 559    | 63278  | 8.4 | DnaJ log subfamily C member 11<br>cDNA FLJ57803, highly similar to sapiens RNA pseudouridylate synthase domain containing 2 (RPUSD2), mRNA                    |
| 3432             | B4DDD1           | 4                    | 7              | 11.6                  | 484    | 54097  | 6.7 |                                                                                                                                                               |
| 3432             | Q8IZ73           | 4                    | 7              | 10.3                  | 545    | 61312  | 7.2 | RNA pseudouridylate synthase domain-containing protein 2<br>cDNA FLJ10629 fis, clone NT2RP2005620, highly similar to Epsin-2                                  |
| 3433             | B3KMB3           | 4                    | 42             | 11.4                  | 484    | 52950  | 7.5 |                                                                                                                                                               |
| 3433             | E9PBC1           | 4                    | 42             | 11.4                  | 484    | 53008  | 7.5 | Uncharacterized protein                                                                                                                                       |
| 3433             | E7EMC3           | 4                    | 42             | 11                    | 499    | 54211  | 7.1 | Uncharacterized protein                                                                                                                                       |
| 3433             | B7ZKM5           | 4                    | 42             | 9.5                   | 577    | 61524  | 7.5 | Putative uncharacterized protein                                                                                                                              |
| 3433             | Q52LD0           | 4                    | 42             | 9.4                   | 584    | 62272  | 7.5 | Epsin 2                                                                                                                                                       |
| 3433             | Q95208-2         | 4                    | 42             | 9.4                   | 583    | 62213  | 7.5 | Isoform 2 of Epsin-2                                                                                                                                          |
| 3433             | E9PBC2           | 4                    | 42             | 9.4                   | 584    | 62300  | 7.5 | Uncharacterized protein                                                                                                                                       |
| 3433             | Q95208           | 4                    | 42             | 8.6                   | 641    | 68482  | 7.5 | Epsin-2                                                                                                                                                       |
| 3434             | Q9BXS6-4         | 4                    | 10             | 11.8                  | 425    | 47570  | 10  | Isoform 4 of Nucleolar and spindle-associated protein 1                                                                                                       |
| 3434             | Q9BXS6-5         | 4                    | 10             | 11.4                  | 440    | 49324  | 9.9 | Isoform 5 of Nucleolar and spindle-associated protein 1                                                                                                       |
| 3434             | Q9BXS6-3         | 4                    | 10             | 11.4                  | 439    | 49196  | 9.9 | Isoform 3 of Nucleolar and spindle-associated protein 1                                                                                                       |
| 3434             | Q9BXS6-2         | 4                    | 10             | 11.4                  | 440    | 49324  | 9.9 | Isoform 2 of Nucleolar and spindle-associated protein 1<br>cDNA FLJ78441, highly similar to sapiens nucleolar and spindle associated protein 1 (NUSAP1), mRNA |
| 3434             | A8K4B4           | 4                    | 10             | 11.3                  | 441    | 49439  | 9.9 |                                                                                                                                                               |
| 3434             | Q9BXS6           | 4                    | 10             | 11.3                  | 441    | 49452  | 9.9 | Nucleolar and spindle-associated protein 1                                                                                                                    |
| 3435             | Q5TEJ8           | 4                    | 6              | 10.9                  | 643    | 72049  | 6.1 | Protein THEMIS2<br>cDNA FLJ56798, highly similar to Acid sphingomyelinase-like phosphodiesterase 3b (EC 3.1.4.-)                                              |
| 3436             | B4DW34           | 4                    | 9              | 10.8                  | 455    | 50786  | 5.6 |                                                                                                                                                               |
| 3436             | Q92485           | 4                    | 9              | 10.8                  | 455    | 50814  | 5.6 | Acid sphingomyelinase-like phosphodiesterase 3b<br>Cytidine 5'-monophosphate N-acetylneuraminic acid synthetase variant (Fragment)                            |
| 3437             | Q53GF0           | 4                    | 4              | 10.8                  | 434    | 48329  | 7.9 |                                                                                                                                                               |
| 3437             | Q8NFW8           | 4                    | 4              | 10.8                  | 434    | 48379  | 7.9 | N-acetylneuraminic acid cytidyltransferase                                                                                                                    |
| 3438             | Q15650           | 4                    | 7              | 10.7                  | 581    | 66146  | 7.9 | Activating signal cointegrator 1                                                                                                                              |
| 3439             | Q15018           | 4                    | 7              | 10.6                  | 415    | 46901  | 6.2 | BRISC complex subunit Abro1                                                                                                                                   |
| 3440             | Q9NUQ6-2         | 4                    | 24             | 12.7                  | 489    | 54178  | 9.6 | Isoform 2 of SPATS2-like protein                                                                                                                              |
| 3440             | Q9NUQ6           | 4                    | 24             | 11.1                  | 558    | 61729  | 9.6 | SPATS2-like protein<br>cDNA FLJ59751, weakly similar to Mus musculus spermatogenesis associated, serine-rich 2 (Spats2), mRNA                                 |
| 3440             | B4DT67           | 4                    | 24             | 10.5                  | 588    | 65152  | 9.7 |                                                                                                                                                               |
| 3441             | Q59G73           | 4                    | 8              | 12.8                  | 431    | 49222  | 6.2 | Exosome component 10 isoform 2 variant (Fragment)                                                                                                             |
| 3441             | B4DFE4           | 4                    | 8              | 10.4                  | 529    | 61316  | 6.5 | cDNA FLJ59618, highly similar to Exosome component 10                                                                                                         |
| 3441             | B4DKG8           | 4                    | 8              | 8.1                   | 679    | 77770  | 6.7 | cDNA FLJ60634, highly similar to Exosome component 10                                                                                                         |
| 3441             | Q01780-2         | 4                    | 8              | 6.4                   | 860    | 98089  | 8.4 | Isoform 2 of Exosome component 10                                                                                                                             |
| 3441             | Q01780           | 4                    | 8              | 6.2                   | 885    | 100831 | 8.5 | Exosome component 10                                                                                                                                          |
| 3442             | E9PNM1           | 4                    | 4              | 12                    | 410    | 47285  | 6.5 | Uncharacterized protein                                                                                                                                       |
| 3442             | P37268           | 4                    | 4              | 11.8                  | 417    | 48115  | 6.5 | Squalene synthase<br>cDNA FLJ55760, highly similar to Squalene synthetase (EC 2.5.1.21)                                                                       |
| 3442             | B4DND3           | 4                    | 4              | 10.3                  | 474    | 53405  | 7.3 |                                                                                                                                                               |
| 3443             | C9JL12           | 4                    | 6              | 10.3                  | 516    | 58958  | 6   | Uncharacterized protein                                                                                                                                       |
| 3443             | Q5VSQ6           | 4                    | 6              | 9.9                   | 534    | 60967  | 6   | Procollagen-proline, 2-oxoglutarate 4-dioxygenase (Proline 4-hydroxylase), alpha polypeptide I                                                                |
| 3443             | P13674           | 4                    | 6              | 9.9                   | 534    | 61049  | 6   | Prolyl 4-hydroxylase subunit alpha-1                                                                                                                          |
| 3444             | Q9H089           | 4                    | 7              | 10                    | 658    | 75225  | 6.4 | Large subunit GTPase 1 log<br>cDNA FLJ75753, highly similar to sapiens primase, polypeptide                                                                   |
| 3445             | A8K7A0           | 4                    | 4              | 9.8                   | 509    | 58834  | 7.9 | 2A, 58kDa (PRIM2A), mRNA                                                                                                                                      |
| 3445             | P49643           | 4                    | 4              | 9.8                   | 509    | 58806  | 7.9 | DNA primase large subunit                                                                                                                                     |
| 3446             | Q9H9A6           | 4                    | 4              | 9.8                   | 602    | 68250  | 6.4 | Leucine-rich repeat-containing protein 40                                                                                                                     |
| 3447             | Q8IY67           | 4                    | 8              | 11.7                  | 606    | 63877  | 8.5 | Ribonucleoprotein PTB-binding 1                                                                                                                               |
| 3447             | Q8IY67-2         | 4                    | 8              | 9.6                   | 739    | 77860  | 8.8 | Isoform 2 of Ribonucleoprotein PTB-binding 1                                                                                                                  |
| 3447             | E9PAU2           | 4                    | 8              | 9.4                   | 756    | 79579  | 8.9 | Uncharacterized protein                                                                                                                                       |
| 3448             | C9JT19           | 4                    | 17             | 9.2                   | 380    | 41494  | 5.2 | Uncharacterized protein                                                                                                                                       |
| 3448             | Q6ZPD6           | 4                    | 17             | 9.2                   | 379    | 41379  | 5.3 | cDNA FLJ25992 fis, clone DMC03508                                                                                                                             |
| 3448             | E7ENV4           | 4                    | 17             | 9.2                   | 379    | 41365  | 5.3 | Uncharacterized protein                                                                                                                                       |
| 3449             | E1CEI4           | 4                    | 8              | 9                     | 599    | 68630  | 5.9 | Glutamate-cysteine ligase delta4 alternative splicing variant                                                                                                 |
| 3449             | P48506           | 4                    | 8              | 8.5                   | 637    | 72766  | 6.1 | Glutamate-cysteine ligase catalytic subunit                                                                                                                   |
| 3450             | Q9H9T3           | 4                    | 4              | 8.8                   | 547    | 62259  | 8.9 | Elongator complex protein 3                                                                                                                                   |
| 3451             | E9PC74           | 4                    | 7              | 8.7                   | 705    | 78347  | 5.2 | Uncharacterized protein                                                                                                                                       |
| 3451             | Q13144           | 4                    | 7              | 8.5                   | 721    | 80380  | 5.1 | Translation initiation factor eIF-2B subunit epsilon                                                                                                          |
| 3452             | B7Z499           | 4                    | 8              | 10.5                  | 488    | 57205  | 8.3 | cDNA FLJ50571, highly similar to Myotubularin (EC 3.1.3.48)                                                                                                   |
| 3452             | B7Z491           | 4                    | 8              | 9                     | 566    | 66053  | 8.4 | cDNA FLJ50569, highly similar to Myotubularin (EC 3.1.3.48)<br>cDNA FLJ76887, highly similar to sapiens myotubularin 1 (MTM1), mRNA                           |
| 3452             | A8K6P5           | 4                    | 8              | 8.5                   | 603    | 69905  | 8.2 |                                                                                                                                                               |
| 3452             | Q13496           | 4                    | 8              | 8.5                   | 603    | 69932  | 8.2 | Myotubularin                                                                                                                                                  |
| 3453             | Q59GC1           | 4                    | 5              | 10.2                  | 527    | 59154  | 8.6 | Fragile X mental retardation 1 variant (Fragment)                                                                                                             |
| 3453             | Q06787-8         | 4                    | 5              | 9.2                   | 586    | 66246  | 8.5 | Isoform 8 of Fragile X mental retardation 1 protein                                                                                                           |
| 3453             | Q06787-5         | 4                    | 5              | 8.9                   | 607    | 68455  | 8.5 | Isoform 4 of Fragile X mental retardation 1 protein                                                                                                           |
| 3453             | UPI00004188C3    | 4                    | 5              | 8.8                   | 611    | 68966  | 7.4 | fragile X mental retardation 1 protein isoform ISO7                                                                                                           |
| 3453             | Q06787-3         | 4                    | 5              | 8.7                   | 620    | 70025  | 7.8 | Isoform 2 of Fragile X mental retardation 1 protein                                                                                                           |
| 3453             | Q06787           | 4                    | 5              | 8.5                   | 632    | 71175  | 7.4 | Fragile X mental retardation 1 protein<br>cDNA, FLJ96618, highly similar to sapiens tyrosyl-DNA phosphodiesterase 1 (TDP1), mRNA                              |
| 3454             | B2RDI0           | 4                    | 4              | 8.4                   | 608    | 68447  | 7.6 |                                                                                                                                                               |
| 3454             | Q9NUW8           | 4                    | 4              | 8.4                   | 608    | 68420  | 7.6 | Tyrosyl-DNA phosphodiesterase 1                                                                                                                               |
| 3455             | E9PHA7           | 4                    | 9              | 8.5                   | 698    | 79192  | 9.4 | Uncharacterized protein                                                                                                                                       |
| 3455             | E7ESY4           | 4                    | 9              | 8.4                   | 703    | 79373  | 9.1 | Uncharacterized protein                                                                                                                                       |
| 3455             | Q13330           | 4                    | 9              | 8.3                   | 715    | 80786  | 9.3 | Metastasis-associated protein MTA1                                                                                                                            |

Table S1. Proteins identified in the OVCAR-3 tumor supernatant by two or more unique peptides.

| Protein or Protein Group | Accession Number | Unique Peptide Count | Spectrum Count | Sequence Coverage (%) | Length | MolWt  | pI  | Descriptive Name                                                                                                                                             |
|--------------------------|------------------|----------------------|----------------|-----------------------|--------|--------|-----|--------------------------------------------------------------------------------------------------------------------------------------------------------------|
| 3456                     | B4E367           | 4                    | 6              | 8.3                   | 515    | 58184  | 6.4 | cDNA FLJ61564, highly similar to Plexin domain-containing protein 2                                                                                          |
| 3456                     | Q6UX71           | 4                    | 6              | 8.1                   | 529    | 59583  | 6.4 | Plexin domain-containing protein 2                                                                                                                           |
| 3457                     | Q9UID3           | 4                    | 11             | 8.3                   | 782    | 86042  | 6.5 | Protein fat-free log                                                                                                                                         |
| 3458                     | O75155-2         | 4                    | 7              | 8.9                   | 1119   | 122664 | 5.9 | Isoform 2 of Cullin-associated NEDD8-dissociated protein 2                                                                                                   |
| 3458                     | O75155           | 4                    | 7              | 8.1                   | 1236   | 135256 | 5.7 | Cullin-associated NEDD8-dissociated protein 2                                                                                                                |
| 3459                     | Q8TCG1           | 4                    | 8              | 8.1                   | 905    | 102185 | 6.2 | Protein CIP2A                                                                                                                                                |
| 3460                     | A5PL29           | 4                    | 8              | 10                    | 601    | 66479  | 5.3 | EPS15L1 protein                                                                                                                                              |
| 3460                     | A2RRF3           | 4                    | 8              | 8                     | 754    | 83248  | 5.1 | EPS15L1 protein                                                                                                                                              |
| 3460                     | A8K5P4           | 4                    | 8              | 7.9                   | 756    | 83501  | 5.1 | cDNA FLJ77869                                                                                                                                                |
| 3460                     | Q9UBC2           | 4                    | 8              | 6.9                   | 864    | 94255  | 5.1 | Epidermal growth factor receptor substrate 15-like 1                                                                                                         |
| 3460                     | UPI000D4C04A     | 4                    | 8              | 6.6                   | 910    | 99606  | 5.1 | UPI000D4C04A UniRef100 entry                                                                                                                                 |
| 3460                     | B4DKA3           | 4                    | 8              | 6.6                   | 910    | 99607  | 5   | cDNA FLJ60624, highly similar to Epidermal growth factor receptor substrate 15-like 1                                                                        |
| 3461                     | D6W5A3           | 4                    | 4              | 8                     | 638    | 73352  | 5.4 | Prolyl endopeptidase-like, isoform CRA_a                                                                                                                     |
| 3461                     | Q4J6C6           | 4                    | 4              | 7                     | 727    | 83927  | 6.4 | Prolyl endopeptidase-like                                                                                                                                    |
| 3462                     | UPI0001AE6648    | 4                    | 7              | 9.4                   | 534    | 60684  | 4.8 | Rab11 family-interacting protein 4 (Rab11-FIP4)                                                                                                              |
| 3462                     | Q86YS3-2         | 4                    | 7              | 9.3                   | 535    | 60771  | 4.9 | Isoform 2 of Rab11 family-interacting protein 4                                                                                                              |
| 3462                     | Q86YS3           | 4                    | 7              | 7.8                   | 637    | 71928  | 4.9 | Rab11 family-interacting protein 4                                                                                                                           |
| 3463                     | A8K3W4           | 4                    | 11             | 7.7                   | 756    | 84822  | 8.8 | cDNA FLJ75163, highly similar to sapiens heterogeneous nuclear ribonucleoprotein U-like 1 (HNRPUL1), transcript variant 4, mRNA                              |
| 3463                     | Q9BUJ2-4         | 4                    | 11             | 7.7                   | 756    | 84794  | 8.8 | Isoform 4 of Heterogeneous nuclear ribonucleoprotein U-like protein 1                                                                                        |
| 3463                     | Q9BUJ2-2         | 4                    | 11             | 7.2                   | 804    | 90292  | 6.9 | Isoform 2 of Heterogeneous nuclear ribonucleoprotein U-like protein 1                                                                                        |
| 3463                     | Q9BUJ2           | 4                    | 11             | 6.8                   | 856    | 95739  | 6.9 | Heterogeneous nuclear ribonucleoprotein U-like protein 1                                                                                                     |
| 3463                     | A8K6U7           | 4                    | 11             | 6.8                   | 856    | 95679  | 6.9 | cDNA FLJ78252, highly similar to sapiens heterogeneous nuclear ribonucleoprotein U-like 1 (HNRPUL1), transcript variant 1, mRNA                              |
| 3463                     | A8K5K0           | 4                    | 11             | 6.8                   | 856    | 95649  | 7.6 | cDNA FLJ78309, highly similar to sapiens heterogeneous nuclear ribonucleoprotein U-like 1 (HNRPUL1), transcript variant 1, mRNA                              |
| 3464                     | Q43290           | 4                    | 5              | 7.6                   | 800    | 90255  | 6.1 | U4/U6.U5 tri-snRNP-associated protein 1                                                                                                                      |
| 3465                     | P52815           | 4                    | 5              | 16.2                  | 198    | 21348  | 8.9 | 39S ribosomal protein L12, mitochondrial                                                                                                                     |
| 3465                     | B4DLN1           | 4                    | 5              | 7.2                   | 442    | 48099  | 9.5 | cDNA FLJ60124, highly similar to Mitochondrial dicarboxylate carrier                                                                                         |
| 3466                     | Q6P275           | 4                    | 10             | 7.2                   | 1221   | 140090 | 5.5 | STAG1 protein                                                                                                                                                |
| 3466                     | Q8WVM7           | 4                    | 10             | 7                     | 1258   | 144427 | 5.6 | Cohesin subunit SA-1                                                                                                                                         |
| 3467                     | Q86Y56           | 4                    | 6              | 7.1                   | 855    | 93521  | 6.4 | HEAT repeat-containing protein 2                                                                                                                             |
| 3468                     | Q9UKW4-2         | 4                    | 5              | 8                     | 753    | 86696  | 6.8 | Isoform Beta of Guanine nucleotide exchange factor VAV3                                                                                                      |
| 3468                     | Q9UKW4           | 4                    | 5              | 7.1                   | 847    | 97776  | 7.1 | Guanine nucleotide exchange factor VAV3                                                                                                                      |
| 3468                     | B7ZLR1           | 4                    | 5              | 6.9                   | 875    | 100814 | 7   | VAV3 protein                                                                                                                                                 |
| 3468                     | E9PO97           | 4                    | 5              | 6.9                   | 875    | 100828 | 7   | Uncharacterized protein                                                                                                                                      |
| 3469                     | Q6V1X1-4         | 4                    | 5              | 7.8                   | 872    | 89908  | 5.4 | Isoform 4 of Dipeptidyl peptidase 8                                                                                                                          |
| 3469                     | Q6V1X1-5         | 4                    | 5              | 7.2                   | 849    | 97739  | 5.4 | Isoform 5 of Dipeptidyl peptidase 8                                                                                                                          |
| 3469                     | Q6V1X1-2         | 4                    | 5              | 7.2                   | 847    | 97464  | 5.9 | Isoform 2 of Dipeptidyl peptidase 8                                                                                                                          |
| 3469                     | Q6V1X1-3         | 4                    | 5              | 6.9                   | 882    | 101422 | 5.6 | Isoform 3 of Dipeptidyl peptidase 8                                                                                                                          |
| 3469                     | B4DLA8           | 4                    | 5              | 6.9                   | 882    | 101416 | 5.6 | cDNA FLJ56045, highly similar to Dipeptidyl peptidase 8 (EC 3.4.14.5)                                                                                        |
| 3469                     | A8K4U2           | 4                    | 5              | 6.8                   | 898    | 103214 | 5.9 | cDNA FLJ77467, highly similar to sapiens dipeptidylpeptidase 8 (DPP8), transcript variant 3, mRNA                                                            |
| 3469                     | Q6V1X1           | 4                    | 5              | 6.8                   | 898    | 103359 | 5.8 | Dipeptidyl peptidase 8                                                                                                                                       |
| 3470                     | B4DTP5           | 4                    | 4              | 6.8                   | 968    | 110345 | 6.2 | cDNA FLJ61394, highly similar to Serine/threonine-protein kinase N2 (EC 2.7.11.13)                                                                           |
| 3470                     | Q16513           | 4                    | 4              | 6.7                   | 984    | 112035 | 6.3 | Serine/threonine-protein kinase N2                                                                                                                           |
| 3471                     | B4DGN8           | 4                    | 4              | 7.1                   | 690    | 79400  | 7   | cDNA FLJ53377, highly similar to Prococollagen-lysine, 2-oxoglutarate 5-dioxygenase 1 (EC 1.14.11.4)                                                         |
| 3471                     | B2R5M9           | 4                    | 4              | 6.7                   | 727    | 83504  | 7   | cDNA, FLJ92537, highly similar to sapiens procollagen-lysine, 2-oxoglutarate 5-dioxygenase (lysine hydroxylase, Ehlers-Danlos syndrome type VI) (PLOD), mRNA |
| 3471                     | Q02809           | 4                    | 4              | 6.7                   | 727    | 83550  | 6.9 | Prococollagen-lysine,2-oxoglutarate 5-dioxygenase 1                                                                                                          |
| 3471                     | B4DR87           | 4                    | 4              | 6.3                   | 774    | 88273  | 7.1 | cDNA FLJ59393, highly similar to Prococollagen-lysine,2-oxoglutarate5-dioxygenase 1 (EC 1.14.11.4)                                                           |
| 3472                     | Q5QP37           | 4                    | 4              | 6.7                   | 862    | 98676  | 6.3 | Icthy E3 ubiquitin protein ligase log (Mouse)                                                                                                                |
| 3472                     | Q96J02           | 4                    | 4              | 6.4                   | 903    | 102803 | 6.3 | E3 ubiquitin-protein ligase Icthy log                                                                                                                        |
| 3473                     | A6NJZ9           | 4                    | 5              | 6.6                   | 800    | 92624  | 9.2 | Uncharacterized protein                                                                                                                                      |
| 3473                     | Q8WTT2           | 4                    | 5              | 6.6                   | 800    | 92548  | 9.2 | Nucleolar complex protein 3 log                                                                                                                              |
| 3473                     | A8K905           | 4                    | 5              | 6.6                   | 800    | 92549  | 9.1 | cDNA FLJ77615, highly similar to sapiens nucleolar complex associated 3 log (S. cerevisiae) (NOC3L), mRNA                                                    |
| 3474                     | P51784           | 4                    | 4              | 6.6                   | 963    | 109817 | 5.5 | Ubiquitin carboxyl-terminal hydrolase 11                                                                                                                     |
| 3475                     | B4DLC7           | 4                    | 8              | 6.5                   | 847    | 97487  | 5.5 | cDNA FLJ60293, highly similar to Signal transducer and activator of transcription 2                                                                          |
| 3475                     | UPI0001CB7F8B    | 4                    | 8              | 6.5                   | 847    | 97457  | 5.5 | signal transducer and activator of transcription 2 isoform 2                                                                                                 |
| 3475                     | P52630           | 4                    | 8              | 6.5                   | 851    | 97916  | 5.5 | Signal transducer and activator of transcription 2                                                                                                           |
| 3476                     | Q14432           | 4                    | 5              | 6.5                   | 1141   | 124979 | 6   | cGMP-inhibited 3',5'-cyclic phosphodiesterase A                                                                                                              |
| 3477                     | P49746           | 4                    | 7              | 6.4                   | 956    | 104201 | 4.7 | Thrombospondin-3                                                                                                                                             |
| 3477                     | Q53FK6           | 4                    | 7              | 6.4                   | 956    | 104299 | 4.7 | Thrombospondin 3 variant (Fragment)                                                                                                                          |
| 3477                     | Q2HIZ0           | 4                    | 7              | 6.4                   | 956    | 104173 | 4.7 | Thrombospondin 3                                                                                                                                             |
| 3478                     | B4DH53           | 4                    | 7              | 6.5                   | 1033   | 109788 | 7.6 | cDNA FLJ55328, highly similar to sapiens BPY2 interacting protein 1 (BPY2IP1), mRNA                                                                          |
| 3478                     | A8K940           | 4                    | 7              | 6.3                   | 1059   | 112227 | 7.3 | cDNA FLJ77630, highly similar to sapiens BPY2 interacting protein 1, mRNA                                                                                    |
| 3478                     | Q66K74           | 4                    | 7              | 6.3                   | 1059   | 112211 | 7.3 | Microtubule-associated protein 1S                                                                                                                            |
| 3479                     | P23497           | 4                    | 7              | 6.1                   | 879    | 100417 | 8.2 | Nuclear autoantigen Sp-100                                                                                                                                   |
| 3480                     | Q9P253           | 4                    | 11             | 6.1                   | 973    | 110186 | 6.1 | Vacuolar protein sorting-associated protein 18 log                                                                                                           |
| 3481                     | Q9BZJ0-2         | 4                    | 4              | 7.3                   | 687    | 83148  | 6.8 | Isoform 2 of Crooked neck-like protein 1                                                                                                                     |
| 3481                     | Q5JY65           | 4                    | 4              | 6                     | 836    | 99173  | 8   | Crooked neck pre-mRNA splicing factor-like 1 (Drosophila)                                                                                                    |
| 3481                     | Q9BZJ0-3         | 4                    | 4              | 6                     | 836    | 99074  | 7.9 | Isoform 3 of Crooked neck-like protein 1                                                                                                                     |
| 3481                     | Q9BZJ0           | 4                    | 4              | 5.9                   | 848    | 100452 | 8   | Crooked neck-like protein 1                                                                                                                                  |
| 3482                     | Q9Y6X8           | 4                    | 4              | 5.9                   | 837    | 92307  | 6.9 | Zinc fingers and homeobox protein 2                                                                                                                          |
| 3483                     | A8K5Y5           | 4                    | 6              | 5.8                   | 969    | 105369 | 5.4 | cDNA FLJ78654, highly similar to sapiens nuclear factor of kappa light polypeptide gene enhancer in B-cells 1 (p105) (NFKB1), mRNA                           |
| 3483                     | P19838-2         | 4                    | 6              | 5.8                   | 969    | 105427 | 5.4 | Isoform 2 of Nuclear factor NF-kappa-B p105 subunit                                                                                                          |
| 3483                     | P19838           | 4                    | 6              | 5.8                   | 968    | 105356 | 5.4 | Nuclear factor NF-kappa-B p105 subunit                                                                                                                       |
| 3484                     | Q2NKK4           | 4                    | 5              | 5.3                   | 838    | 90522  | 5   | Transforming, acidic coiled-coil containing protein 3                                                                                                        |
| 3484                     | Q9Y6A5           | 4                    | 5              | 5.3                   | 838    | 90360  | 5   | Transforming acidic coiled-coil-containing protein 3                                                                                                         |
| 3485                     | Q96JH7           | 4                    | 4              | 5.2                   | 1222   | 134320 | 7.2 | Deubiquitinating protein VCIP135                                                                                                                             |
| 3486                     | A6NMQ1           | 4                    | 5              | 5.1                   | 1468   | 166457 | 5.8 | DNA polymerase                                                                                                                                               |
| 3486                     | P09884           | 4                    | 5              | 5.1                   | 1462   | 165912 | 5.8 | DNA polymerase alpha catalytic subunit                                                                                                                       |
| 3487                     | A8K2F9           | 4                    | 4              | 5.1                   | 1195   | 130402 | 6.3 | cDNA FLJ77037, highly similar to sapiens RNA polymerase II associated protein 1, mRNA (Fragment)                                                             |

Table S1. Proteins identified in the OVCAR-3 tumor supernatant by two or more unique peptides.

| Protein or Protein Group | Accession Number | Unique Peptide Count | Spectrum Count | Sequence Coverage (%) | Length | MolWt  | pI  | Descriptive Name                                                                                                             |
|--------------------------|------------------|----------------------|----------------|-----------------------|--------|--------|-----|------------------------------------------------------------------------------------------------------------------------------|
| 3487                     | Q9BWH6-2         | 4                    | 4              | 4.6                   | 1315   | 143582 | 6.5 | Isoform 2 of RNA polymerase II-associated protein 1                                                                          |
| 3487                     | Q9BWH6           | 4                    | 4              | 4.4                   | 1393   | 152754 | 6.4 | RNA polymerase II-associated protein 1                                                                                       |
| 3488                     | B1B0M1           | 4                    | 4              | 5.4                   | 796    | 90841  | 5.1 | GRIP1 associated protein 1                                                                                                   |
| 3488                     | Q4V3Z8-4         | 4                    | 4              | 5.3                   | 810    | 92738  | 5.2 | Isoform 4 of GRIP1-associated protein 1                                                                                      |
| 3488                     | A8K7Z3           | 4                    | 4              | 5.1                   | 841    | 95990  | 5.1 | cDNA FLJ77229, highly similar to sapiens GRIP1 associated protein 1 (GRIPAP1), transcript variant 1, mRNA                    |
| 3488                     | Q4V3Z8           | 4                    | 4              | 5.1                   | 841    | 95989  | 5.1 | GRIP1-associated protein 1                                                                                                   |
| 3489                     | Q86UK7           | 4                    | 9              | 5.1                   | 904    | 98637  | 8.4 | Zinc finger protein 598                                                                                                      |
| 3489                     | Q86UK7-3         | 4                    | 9              | 5.1                   | 898    | 98124  | 8.4 | Isoform 3 of Zinc finger protein 598                                                                                         |
| 3489                     | Q86UK7-2         | 4                    | 9              | 5.1                   | 896    | 97806  | 8.3 | Isoform 2 of Zinc finger protein 598                                                                                         |
| 3490                     | Q9NQ66           | 4                    | 4              | 4.9                   | 1216   | 138567 | 6.2 | 1-phosphatidylinositol-4,5-bisphosphate phosphodiesterase beta-1                                                             |
| 3491                     | B7Z758           | 4                    | 6              | 5                     | 1078   | 120156 | 5.8 | cDNA FLJ61717, highly similar to Cytosin-A                                                                                   |
| 3491                     | B2RMV2           | 4                    | 6              | 4.8                   | 1117   | 124576 | 5.8 | CYTA protein                                                                                                                 |
| 3491                     | Q69YQ0           | 4                    | 6              | 4.8                   | 1117   | 124602 | 5.7 | Cytosin-A                                                                                                                    |
| 3492                     | E7EP14           | 4                    | 6              | 5.1                   | 792    | 88984  | 8.6 | Uncharacterized protein                                                                                                      |
| 3492                     | B4DMI9           | 4                    | 6              | 5.1                   | 792    | 88929  | 8.5 | cDNA FLJ55894, highly similar to Discs large log 7                                                                           |
| 3492                     | B4DRM8           | 4                    | 6              | 4.8                   | 842    | 94148  | 9.1 | cDNA FLJ60069, highly similar to Discs large log 7                                                                           |
| 3492                     | A8K732           | 4                    | 6              | 4.7                   | 846    | 95131  | 9   | cDNA FLJ78771, highly similar to sapiens discs, large log 7 (Drosophila), mRNA                                               |
| 3492                     | Q15398           | 4                    | 6              | 4.7                   | 846    | 95115  | 9   | Disks large-associated protein 5                                                                                             |
| 3492                     | Q86T11           | 4                    | 6              | 4.6                   | 869    | 97450  | 9.1 | Full-length cDNA clone CSODH002YN05 of T cells (Jurkat cell line) of sapiens (human) (Fragment)                              |
| 3493                     | B3KMC2           | 4                    | 11             | 7.9                   | 647    | 72716  | 7.4 | cDNA FLJ10676 fis, clone NT2RP2006464, highly similar to WD repeat and HMG-box DNA-binding protein 1                         |
| 3493                     | B3KMD2           | 4                    | 11             | 6.4                   | 798    | 89594  | 5.8 | cDNA FLJ10723 fis, clone NT2RP3001155, highly similar to WD repeat and HMG-box DNA-binding protein 1                         |
| 3493                     | A8MRA5           | 4                    | 11             | 5.1                   | 1006   | 112704 | 5.7 | Uncharacterized protein                                                                                                      |
| 3493                     | A8KAE0           | 4                    | 11             | 4.5                   | 1129   | 126015 | 5.6 | cDNA FLJ78476, highly similar to sapiens WD repeat and HMG-box DNA binding protein 1 (WDHD1), transcript variant 1, mRNA     |
| 3493                     | Q75717           | 4                    | 11             | 4.5                   | 1129   | 125967 | 5.6 | WD repeat and HMG-box DNA-binding protein 1                                                                                  |
| 3494                     | UPI0001BFBBED    | 4                    | 5              | 4.7                   | 1245   | 136540 | 4.7 | WASH complex subunit FAM21C isoform 3                                                                                        |
| 3494                     | B4DZQ6           | 4                    | 5              | 4.7                   | 1245   | 136464 | 4.7 | cDNA FLJ61504, highly similar to Protein FAM21C                                                                              |
| 3494                     | UPI0001AE6CD7    | 4                    | 5              | 4.6                   | 1253   | 136705 | 4.8 | UPI0001AE6CD7 UniRef100 entry                                                                                                |
| 3494                     | UPI0000D60F51    | 4                    | 5              | 4.6                   | 1264   | 138257 | 4.8 | Protein FAM21C                                                                                                               |
| 3494                     | Q9Y4E1-3         | 4                    | 5              | 4.6                   | 1263   | 138145 | 4.8 | Isoform 3 of WASH complex subunit FAM21C                                                                                     |
| 3494                     | Q5SNT6           | 4                    | 5              | 4.6                   | 1253   | 136969 | 4.8 | WASH complex subunit FAM21B                                                                                                  |
| 3494                     | E9PE42           | 4                    | 5              | 4.6                   | 1253   | 136862 | 4.8 | Uncharacterized protein                                                                                                      |
| 3494                     | UPI0001BFBBEC    | 4                    | 5              | 4.5                   | 1279   | 140143 | 4.7 | WASH complex subunit FAM21C isoform 2                                                                                        |
| 3494                     | B9EK53           | 4                    | 5              | 4.5                   | 1279   | 140098 | 4.7 | FAM21C protein                                                                                                               |
| 3494                     | A8K5W5           | 4                    | 5              | 4.4                   | 1320   | 144805 | 4.8 | cDNA FLJ77522                                                                                                                |
| 3494                     | Q9Y4E1-4         | 4                    | 5              | 4.4                   | 1320   | 144911 | 4.8 | Isoform 4 of WASH complex subunit FAM21C                                                                                     |
| 3494                     | Q9Y4E1-2         | 4                    | 5              | 4.4                   | 1310   | 143648 | 4.8 | Isoform 2 of WASH complex subunit FAM21C                                                                                     |
| 3494                     | Q9Y4E1           | 4                    | 5              | 4.4                   | 1318   | 144668 | 4.8 | WASH complex subunit FAM21C                                                                                                  |
| 3494                     | E7ER73           | 4                    | 5              | 4.4                   | 1319   | 144810 | 4.8 | Uncharacterized protein                                                                                                      |
| 3494                     | B7ZME8           | 4                    | 5              | 4.4                   | 1320   | 145075 | 4.8 | FAM21A protein                                                                                                               |
| 3494                     | UPI0001AE6CD6    | 4                    | 5              | 4.3                   | 1341   | 147054 | 4.8 | Protein FAM21C                                                                                                               |
| 3494                     | Q641Q2           | 4                    | 5              | 4.3                   | 1341   | 147183 | 4.8 | WASH complex subunit FAM21A                                                                                                  |
| 3495                     | Q53F89           | 4                    | 24             | 7.1                   | 764    | 85563  | 7   | Complement factor B (Fragment)                                                                                               |
| 3495                     | P00751           | 4                    | 24             | 7.1                   | 764    | 85533  | 7.1 | Complement factor B                                                                                                          |
| 3495                     | E7ETN3           | 4                    | 24             | 4.8                   | 1115   | 124016 | 6.8 | Uncharacterized protein                                                                                                      |
| 3495                     | B4E1Z4           | 4                    | 24             | 4.3                   | 1266   | 140942 | 7.2 | cDNA FLJ55673, highly similar to Complement factor B (EC 3.4.21.47)                                                          |
| 3495                     | E7EVA3           | 4                    | 24             | 4.3                   | 1266   | 140943 | 7.1 | Uncharacterized protein                                                                                                      |
| 3496                     | Q8N122           | 4                    | 5              | 4.1                   | 1335   | 149037 | 6.9 | Regulatory-associated protein of mTOR                                                                                        |
| 3497                     | Q96RT1-7         | 4                    | 6              | 4                     | 1302   | 146086 | 5.3 | Isoform 7 of Protein LAP2                                                                                                    |
| 3497                     | A0AVR1           | 4                    | 6              | 3.8                   | 1371   | 153952 | 5.5 | ErbB2 interacting protein                                                                                                    |
| 3497                     | Q96RT1-5         | 4                    | 6              | 3.8                   | 1356   | 152290 | 5.4 | Isoform 5 of Protein LAP2                                                                                                    |
| 3497                     | Q96RT1-3         | 4                    | 6              | 3.8                   | 1360   | 152652 | 5.4 | Isoform 3 of Protein LAP2                                                                                                    |
| 3497                     | Q96RT1-2         | 4                    | 6              | 3.8                   | 1371   | 153926 | 5.5 | Isoform 2 of Protein LAP2                                                                                                    |
| 3497                     | Q1RMD0           | 4                    | 6              | 3.8                   | 1371   | 153788 | 5.5 | ErbB2 interacting protein                                                                                                    |
| 3497                     | E7EQW9           | 4                    | 6              | 3.8                   | 1367   | 153542 | 5.4 | Uncharacterized protein                                                                                                      |
| 3497                     | Q96RT1           | 4                    | 6              | 3.7                   | 1412   | 158297 | 5.5 | Protein LAP2                                                                                                                 |
| 3497                     | E9PCR8           | 4                    | 6              | 3.7                   | 1419   | 159023 | 5.6 | Uncharacterized protein                                                                                                      |
| 3497                     | B7ZLV9           | 4                    | 6              | 3.7                   | 1419   | 159051 | 5.6 | ERBB2IP protein                                                                                                              |
| 3498                     | Q2TAZ0           | 4                    | 4              | 3.7                   | 1938   | 212858 | 5.9 | Autophagy-related protein 2 log A                                                                                            |
| 3498                     | Q2TAZ0-3         | 4                    | 4              | 3.7                   | 1940   | 213085 | 5.9 | Isoform 2 of Autophagy-related protein 2 log A                                                                               |
| 3499                     | UPI0001AE75B5    | 4                    | 4              | 3.3                   | 1383   | 154771 | 6.2 | Receptor-type tyrosine-protein phosphatase gamma precursor (EC 3.1.3.48) (Protein-tyrosine phosphatase gamma) (R-PTP-gamma). |
| 3499                     | UPI0001AE75B4    | 4                    | 4              | 3.3                   | 1354   | 151539 | 6   | Receptor-type tyrosine-protein phosphatase gamma precursor (EC 3.1.3.48) (Protein-tyrosine phosphatase gamma) (R-PTP-gamma). |
| 3499                     | B7ZLX5           | 4                    | 4              | 3.2                   | 1416   | 158744 | 6.2 | PTPRG protein                                                                                                                |
| 3499                     | P23470-2         | 4                    | 4              | 3.2                   | 1416   | 158770 | 6.2 | Isoform 2 of Receptor-type tyrosine-protein phosphatase gamma                                                                |
| 3499                     | P23470           | 4                    | 4              | 3.1                   | 1445   | 162003 | 6.4 | Receptor-type tyrosine-protein phosphatase gamma                                                                             |
| 3500                     | Q8IWQ7           | 4                    | 10             | 3.2                   | 1638   | 186037 | 6.4 | CDC42-binding protein kinase beta                                                                                            |
| 3500                     | Q5VT25-3         | 4                    | 10             | 3.2                   | 1638   | 186112 | 6.3 | Isoform 3 of Serine/threonine-protein kinase MRCK alpha                                                                      |
| 3500                     | B9EGA7           | 4                    | 10             | 3.1                   | 1699   | 193662 | 6.7 | CDC42BPA protein                                                                                                             |
| 3500                     | Q5VT25-5         | 4                    | 10             | 3.1                   | 1719   | 195921 | 6.5 | Isoform 5 of Serine/threonine-protein kinase MRCK alpha                                                                      |
| 3500                     | Q5VT25-4         | 4                    | 10             | 3.1                   | 1691   | 193030 | 6.3 | Isoform 4 of Serine/threonine-protein kinase MRCK alpha                                                                      |
| 3500                     | Q5VT25           | 4                    | 10             | 3.1                   | 1732   | 197306 | 6.6 | Serine/threonine-protein kinase MRCK alpha                                                                                   |
| 3500                     | Q5VT25-6         | 4                    | 10             | 3                     | 1781   | 202811 | 6.5 | Isoform 6 of Serine/threonine-protein kinase MRCK alpha                                                                      |
| 3500                     | Q5VT25-2         | 4                    | 10             | 3                     | 1754   | 199809 | 6.4 | Isoform 2 of Serine/threonine-protein kinase MRCK alpha                                                                      |
| 3501                     | E7EMX7           | 4                    | 9              | 3                     | 973    | 109164 | 6.1 | Uncharacterized protein                                                                                                      |
| 3501                     | Q9P0K7-3         | 4                    | 9              | 3                     | 972    | 109080 | 6   | Isoform 3 of Ankyrin                                                                                                         |
| 3501                     | Q9P0K7-2         | 4                    | 9              | 3                     | 983    | 110423 | 6.1 | Isoform 2 of Ankyrin                                                                                                         |
| 3501                     | Q9P0K7           | 4                    | 9              | 3                     | 980    | 110041 | 6.2 | Ankyrin                                                                                                                      |
| 3501                     | E9PED3           | 4                    | 9              | 3                     | 951    | 106905 | 6   | Uncharacterized protein                                                                                                      |
| 3502                     | Q86XA9-2         | 4                    | 8              | 3.2                   | 1965   | 214081 | 6.5 | Isoform 2 of HEAT repeat-containing protein 5A                                                                               |
| 3502                     | Q86XA9           | 4                    | 8              | 3                     | 2040   | 222002 | 6.6 | HEAT repeat-containing protein 5A                                                                                            |
| 3503                     | UPI0001881A85    | 4                    | 7              | 3                     | 1941   | 211695 | 5.6 | WD repeat-containing protein 81 isoform 1                                                                                    |
| 3504                     | Q96N67-6         | 4                    | 8              | 3                     | 2131   | 241670 | 6.8 | Isoform 6 of Dedicator of cytokinesis protein 7                                                                              |
| 3504                     | Q96N67-5         | 4                    | 8              | 3                     | 2109   | 239420 | 6.8 | Isoform 5 of Dedicator of cytokinesis protein 7                                                                              |
| 3504                     | Q96N67-4         | 4                    | 8              | 3                     | 2098   | 238272 | 6.8 | Isoform 4 of Dedicator of cytokinesis protein 7                                                                              |
| 3504                     | Q96N67-3         | 4                    | 8              | 3                     | 2100   | 238532 | 6.8 | Isoform 3 of Dedicator of cytokinesis protein 7                                                                              |
| 3504                     | Q96N67-2         | 4                    | 8              | 3                     | 2129   | 241410 | 6.8 | Isoform 2 of Dedicator of cytokinesis protein 7                                                                              |
| 3504                     | Q96N67           | 4                    | 8              | 2.9                   | 2140   | 242558 | 6.8 | Dedicator of cytokinesis protein 7                                                                                           |
| 3505                     | P35658           | 4                    | 26             | 2.6                   | 2090   | 213618 | 7.5 | Nuclear pore complex protein Nup214                                                                                          |
| 3505                     | P35658-5         | 4                    | 26             | 2.6                   | 2093   | 215399 | 7.7 | Isoform 5 of Nuclear pore complex protein Nup214                                                                             |
| 3505                     | P35658-4         | 4                    | 26             | 2.6                   | 2080   | 212641 | 7.4 | Isoform 4 of Nuclear pore complex protein Nup214                                                                             |
| 3505                     | P35658-3         | 4                    | 26             | 2.6                   | 2091   | 213689 | 7.5 | Isoform 3 of Nuclear pore complex protein Nup214                                                                             |

Table S1. Proteins identified in the OVCAR-3 tumor supernatant by two or more unique peptides.

| Protein or Protein Group | Accession Number | Unique Peptide Count | Spectrum Count | Sequence Coverage (%) | Length | MolWt  | pI   | Descriptive Name                                                                                                      |
|--------------------------|------------------|----------------------|----------------|-----------------------|--------|--------|------|-----------------------------------------------------------------------------------------------------------------------|
| 3505                     | P35658-2         | 4                    | 26             | 2.6                   | 2079   | 212569 | 7.4  | Isoform 2 of Nuclear pore complex protein Nup214                                                                      |
| 3506                     | A8KA50           | 4                    | 6              | 3.3                   | 1267   | 137433 | 4.4  | cDNA FLJ78617 (Fragment)                                                                                              |
|                          |                  |                      |                |                       |        |        |      | cDNA FLJ56510, highly similar to Tumor suppressor p53-binding protein 1                                               |
| 3506                     | B7Z3E7           | 4                    | 6              | 2.4                   | 1760   | 189918 | 4.7  | Uncharacterized protein                                                                                               |
| 3506                     | A6NNK5           | 4                    | 6              | 2.2                   | 1927   | 209018 | 4.7  | Uncharacterized protein                                                                                               |
| 3506                     | UPI000153D540    | 4                    | 6              | 2.1                   | 1975   | 213987 | 4.7  | tumor suppressor p53-binding protein 1 isoform 2                                                                      |
| 3506                     | Q12888           | 4                    | 6              | 2.1                   | 1972   | 213573 | 4.7  | Tumor suppressor p53-binding protein 1                                                                                |
| 3507                     | Q9HCU4           | 4                    | 4              | 2.2                   | 2923   | 317453 | 5.3  | Cadherin EGF LAG seven-pass G-type receptor 2                                                                         |
| 3508                     | A4LAA3           | 4                    | 6              | 1.7                   | 2492   | 282585 | 6.6  | Alpha thalassemia/mental retardation syndrome X-linked                                                                |
| 3508                     | P46100           | 4                    | 6              | 1.7                   | 2492   | 282584 | 6.6  | Transcriptional regulator ATRX                                                                                        |
| 3509                     | Q96T58           | 4                    | 7              | 1.5                   | 3664   | 402251 | 7.6  | Msx2-interacting protein                                                                                              |
| 3510                     | B011S0           | 4                    | 4              | 1.1                   | 4307   | 492655 | 6.5  | DYNC2H1 variant protein                                                                                               |
| 3510                     | Q8NCMB-2         | 4                    | 4              | 1.1                   | 4314   | 493425 | 6.6  | Isoform 2 of Cytoplasmic dynein 2 heavy chain 1                                                                       |
| 3510                     | Q8NCMB           | 4                    | 4              | 1.1                   | 4307   | 492627 | 6.5  | Cytoplasmic dynein 2 heavy chain 1                                                                                    |
|                          |                  |                      |                |                       |        |        |      | DNA-directed RNA polymerases I, II, and III subunit RPABC5 DNA-directed RNA polymerases I, II, and III subunit RPABC5 |
| 3511                     | P62875           | 3                    | 11             | 65.7                  | 67     | 7645   | 7.8  | Ubiquitin-fold modifier 1 Ubiquitin-fold modifier 1                                                                   |
| 3512                     | P61960           | 3                    | 38             | 60                    | 85     | 9118   | 9.3  | Ubiquitin-fold modifier 1 precursor.                                                                                  |
| 3512                     | UPI0000EB10F0    | 3                    | 38             | 60                    | 85     | 9143   | 9.6  | Ubiquitin-fold modifier 1 precursor.                                                                                  |
| 3513                     | Q49AN9           | 3                    | 31             | 78.1                  | 64     | 7101   | 7.2  | SNRPG protein SNRPG protein                                                                                           |
|                          |                  |                      |                |                       |        |        |      | Small nuclear ribonucleoprotein G Small nuclear ribonucleoprotein G                                                   |
| 3513                     | P62308           | 3                    | 31             | 65.8                  | 76     | 8496   | 8.9  | Uncharacterized protein                                                                                               |
| 3513                     | C9J303           | 3                    | 31             | 58.1                  | 86     | 9711   | 7.2  | Uncharacterized protein                                                                                               |
|                          |                  |                      |                |                       |        |        |      | H/ACA ribonucleoprotein complex subunit 3 H/ACA ribonucleoprotein complex subunit 3                                   |
| 3514                     | Q9NPE3           | 3                    | 8              | 57.8                  | 64     | 7706   | 10   | ADP-ribosylation factor 3 ADP-ribosylation factor 3                                                                   |
| 3515                     | P61204           | 3                    | 144            | 54.7                  | 181    | 20601  | 7.4  | ADP-ribosylation factor 1 ADP-ribosylation factor 1                                                                   |
| 3515                     | P84077           | 3                    | 144            | 54.7                  | 181    | 20697  | 6.8  | ADP-ribosylation factor 1 ADP-ribosylation factor 1                                                                   |
| 3516                     | Q13885           | 3                    | 9              | 52.6                  | 445    | 49907  | 4.9  | Tubulin beta-2A chain Tubulin beta-2A chain                                                                           |
| 3517                     | Q8BUR9           | 3                    | 3              | 55.1                  | 78     | 8132   | 4.8  | Mitotic-spindle organizing protein 1                                                                                  |
| 3517                     | Q08AG7           | 3                    | 3              | 52.4                  | 82     | 8479   | 4.8  | Mitotic-spindle organizing protein 1                                                                                  |
| 3518                     | P01116-2         | 3                    | 6              | 52.1                  | 188    | 21425  | 8.1  | Isoform 2B of GTPase KRas                                                                                             |
| 3518                     | Q5J7N1           | 3                    | 6              | 52.1                  | 188    | 21483  | 8.1  | Kras protein                                                                                                          |
| 3519                     | P62857           | 3                    | 26             | 46.4                  | 69     | 7841   | 10.7 | 40S ribosomal protein S28 40S ribosomal protein S28                                                                   |
| 3520                     | Q99LT0           | 3                    | 23             | 45.5                  | 99     | 11213  | 4.9  | Protein dpy-30 log                                                                                                    |
| 3520                     | Q9C005           | 3                    | 23             | 45.5                  | 99     | 11250  | 4.9  | Protein dpy-30 log                                                                                                    |
| 3521                     | D6RAH7           | 3                    | 18             | 44.9                  | 118    | 13637  | 8.3  | Ubiquitin carrier protein                                                                                             |
| 3521                     | Q96RP6           | 3                    | 18             | 44.9                  | 118    | 13635  | 8.3  | Ubiquitin carrier protein                                                                                             |
| 3521                     | Q9D1S1           | 3                    | 18             | 36.1                  | 147    | 16629  | 8.2  | Ubiquitin carrier protein                                                                                             |
|                          |                  |                      |                |                       |        |        |      | Ubiquitin-conjugating enzyme E2 D2 Ubiquitin-conjugating enzyme E2 D2                                                 |
| 3521                     | P62837           | 3                    | 18             | 36.1                  | 147    | 16735  | 7.8  | Ubiquitin-conjugating enzyme E2 D3 Ubiquitin-conjugating enzyme E2 D3                                                 |
| 3521                     | P61077           | 3                    | 18             | 36.1                  | 147    | 16687  | 7.8  | Ubiquitin-conjugating enzyme E2 D3                                                                                    |
| 3521                     | P61077-2         | 3                    | 18             | 35.8                  | 148    | 16785  | 7.3  | Isoform 2 of Ubiquitin-conjugating enzyme E2 D3                                                                       |
| 3521                     | P61077-3         | 3                    | 18             | 35.6                  | 149    | 16893  | 7.8  | Isoform 3 of Ubiquitin-conjugating enzyme E2 D3                                                                       |
| 3522                     | Q13503           | 3                    | 5              | 43.8                  | 144    | 15564  | 4.4  | Mediator of RNA polymerase II transcription subunit 21                                                                |
| 3522                     | Q9CQ39           | 3                    | 5              | 43.8                  | 144    | 15588  | 4.5  | Mediator of RNA polymerase II transcription subunit 21                                                                |
| 3523                     | B5BU78           | 3                    | 11             | 43.4                  | 173    | 19787  | 9    | Protein tyrosine phosphatase type IVA protein 1                                                                       |
|                          |                  |                      |                |                       |        |        |      | Protein tyrosine phosphatase type IVA 1 Protein tyrosine phosphatase type IVA 1                                       |
| 3523                     | Q93096           | 3                    | 11             | 43.4                  | 173    | 19815  | 9    | Isoform 2 of Ras-related protein Rab-6A                                                                               |
| 3524                     | P20340-2         | 3                    | 12             | 42.8                  | 208    | 23549  | 5.5  | RAB6A protein                                                                                                         |
| 3524                     | Q6FGX3           | 3                    | 12             | 42.8                  | 208    | 23550  | 5.4  | RAB6A protein                                                                                                         |
| 3524                     | Q3U4W5           | 3                    | 12             | 42.8                  | 208    | 23546  | 5.5  | RAB6, member RAS oncogene family, isoform CRA_c                                                                       |
|                          |                  |                      |                |                       |        |        |      | cDNA FLJ51872, highly similar to Small nuclear ribonucleoprotein Sm D3                                                |
| 3525                     | B4DJP7           | 3                    | 53             | 42.5                  | 120    | 13292  | 8.9  | Small nuclear ribonucleoprotein D3                                                                                    |
| 3525                     | Q91VM2           | 3                    | 53             | 40.5                  | 126    | 13985  | 10.5 | Small nuclear ribonucleoprotein Sm D3 Small nuclear ribonucleoprotein Sm D3                                           |
| 3525                     | P62318           | 3                    | 53             | 40.5                  | 126    | 13916  | 10.3 | Small nuclear ribonucleoprotein Sm D3                                                                                 |
| 3525                     | UPI0001610F70    | 3                    | 53             | 29.1                  | 175    | 18830  | 8.3  | UPI0001610F70 UniRef100 entry                                                                                         |
| 3526                     | P56377           | 3                    | 10             | 40.8                  | 157    | 18615  | 5.5  | AP-1 complex subunit sigma-2 AP-1 complex subunit sigma-2                                                             |
| 3527                     | P04271           | 3                    | 5              | 40.2                  | 92     | 10713  | 4.6  | Protein S100-B                                                                                                        |
| 3527                     | P50114           | 3                    | 5              | 40.2                  | 92     | 10728  | 4.5  | Protein S100-B                                                                                                        |
| 3528                     | Q3U281           | 3                    | 5              | 36.9                  | 198    | 22310  | 6.4  | Putative uncharacterized protein                                                                                      |
| 3528                     | Q9Y6B6           | 3                    | 5              | 36.9                  | 198    | 22410  | 6.1  | GTP-binding protein SAR1b                                                                                             |
| 3528                     | Q9CQC9           | 3                    | 5              | 36.9                  | 198    | 22382  | 6.1  | GTP-binding protein SAR1b                                                                                             |
| 3528                     | Q53F37           | 3                    | 5              | 36.9                  | 198    | 22410  | 6.1  | SAR1a gene log 2 variant (Fragment)                                                                                   |
| 3529                     | O35127           | 3                    | 13             | 36.5                  | 126    | 13194  | 5.1  | Protein C10                                                                                                           |
| 3529                     | Q99622           | 3                    | 13             | 36.5                  | 126    | 13178  | 5.1  | Protein C10                                                                                                           |
|                          |                  |                      |                |                       |        |        |      | Rho-related GTP-binding protein RhoB Rho-related GTP-binding protein RhoB                                             |
| 3530                     | P62745           | 3                    | 12             | 35.7                  | 196    | 22123  | 5.2  | Protein Dr1                                                                                                           |
| 3531                     | Q01658           | 3                    | 15             | 34.7                  | 176    | 19444  | 4.7  | Protein Dr1                                                                                                           |
| 3531                     | Q91WV0           | 3                    | 15             | 34.7                  | 176    | 19431  | 4.7  | Protein Dr1                                                                                                           |
| 3531                     | Q53F47           | 3                    | 15             | 34.7                  | 176    | 19472  | 4.7  | Down-regulator of transcription 1 variant (Fragment)                                                                  |
| 3531                     | Q3UMQ2           | 3                    | 15             | 34.7                  | 176    | 19465  | 4.7  | Putative uncharacterized protein                                                                                      |
| 3532                     | Q5T179           | 3                    | 30             | 38.8                  | 67     | 8027   | 6.4  | CDC28 protein kinase regulatory subunit 1B                                                                            |
|                          |                  |                      |                |                       |        |        |      | Cyclin-dependent kinases regulatory subunit 1 Cyclin-dependent kinases regulatory subunit 1                           |
| 3532                     | P61024           | 3                    | 30             | 32.9                  | 79     | 9660   | 8.9  | MCG132387                                                                                                             |
| 3532                     | Q3UNC9           | 3                    | 30             | 27.1                  | 96     | 11553  | 8    | Uncharacterized protein                                                                                               |
| 3533                     | C9K025           | 3                    | 15             | 28.7                  | 94     | 10645  | 10.7 | PREDICTED: 60S ribosomal protein L35a-like                                                                            |
| 3533                     | UPI0000024BEC    | 3                    | 15             | 24.5                  | 110    | 12478  | 10.4 | Putative uncharacterized protein                                                                                      |
| 3533                     | Q9DC85           | 3                    | 15             | 24.5                  | 110    | 12573  | 11.1 | Putative uncharacterized protein                                                                                      |
| 3533                     | Q8BQV7           | 3                    | 15             | 24.5                  | 110    | 12563  | 10.9 | Putative uncharacterized protein                                                                                      |
| 3533                     | P18077           | 3                    | 15             | 24.5                  | 110    | 12538  | 11.1 | 60S ribosomal protein L35a                                                                                            |
| 3533                     | O55142           | 3                    | 15             | 24.5                  | 110    | 12554  | 10.9 | 60S ribosomal protein L35a                                                                                            |
| 3533                     | E9PXU5           | 3                    | 15             | 24.5                  | 110    | 12483  | 10.7 | Uncharacterized protein                                                                                               |
| 3533                     | D3Z2T7           | 3                    | 15             | 24.5                  | 110    | 12550  | 10.9 | MCG123716                                                                                                             |
| 3534                     | Q9D056           | 3                    | 11             | 34.3                  | 169    | 18796  | 4.9  | Putative uncharacterized protein                                                                                      |
| 3534                     | P25208           | 3                    | 11             | 28                    | 207    | 22831  | 4.6  | Nuclear transcription factor Y subunit beta                                                                           |
| 3534                     | P63139           | 3                    | 11             | 28                    | 207    | 22787  | 4.6  | Nuclear transcription factor Y subunit beta                                                                           |
| 3534                     | Q8C590           | 3                    | 11             | 25.9                  | 224    | 24587  | 4.6  | Putative uncharacterized protein                                                                                      |
| 3535                     | Q8TAX8           | 3                    | 7              | 29.1                  | 151    | 17248  | 6.5  | MYC associated factor X                                                                                               |
| 3535                     | Q8C4Y1           | 3                    | 7              | 29.1                  | 151    | 17172  | 6.5  | Max protein                                                                                                           |
| 3535                     | E2QZ08           | 3                    | 7              | 29.1                  | 151    | 17202  | 6.5  | Uncharacterized protein                                                                                               |
| 3535                     | B2RS19           | 3                    | 7              | 27.5                  | 160    | 18245  | 6.3  | Max protein                                                                                                           |
| 3535                     | P61244           | 3                    | 7              | 27.5                  | 160    | 18275  | 6.3  | Protein max                                                                                                           |
| 3536                     | C9JDE5           | 3                    | 5              | 26.5                  | 132    | 15244  | 7.4  | Uncharacterized protein                                                                                               |
|                          |                  |                      |                |                       |        |        |      | Isoform 2 of Trafficking protein particle complex subunit 2-like protein                                              |
| 3536                     | Q9UL33-2         | 3                    | 5              | 25.2                  | 139    | 16059  | 6.8  | Trafficking protein particle complex subunit 2-like protein                                                           |
| 3536                     | Q9JME7           | 3                    | 5              | 25.2                  | 139    | 16018  | 6.8  | Trafficking protein particle complex subunit 2-like protein                                                           |
| 3536                     | Q9UL33           | 3                    | 5              | 25                    | 140    | 16146  | 6.8  | Trafficking protein particle complex subunit 2-like protein                                                           |
| 3537                     | E9PM92           | 3                    | 21             | 25.6                  | 156    | 17506  | 9.5  | Uncharacterized protein                                                                                               |
| 3537                     | Q9R0P4           | 3                    | 21             | 22.1                  | 181    | 20046  | 4.8  | Small acidic protein                                                                                                  |
| 3537                     | O00193           | 3                    | 21             | 21.9                  | 183    | 20333  | 4.7  | Small acidic protein                                                                                                  |
| 3538                     | O60613           | 3                    | 6              | 25.3                  | 162    | 17640  | 5    | 15 kDa selenoprotein                                                                                                  |
| 3538                     | Q9ERR7           | 3                    | 6              | 25.3                  | 162    | 17656  | 5.4  | 15 kDa selenoprotein                                                                                                  |



Table S1. Proteins identified in the OVCAR-3 tumor supernatant by two or more unique peptides.

| Protein or Protein Group | Accession Number | Unique Peptide Count | Spectrum Count | Sequence Coverage (%) | Length | MolWt | pI   | Descriptive Name                                                                                                           |
|--------------------------|------------------|----------------------|----------------|-----------------------|--------|-------|------|----------------------------------------------------------------------------------------------------------------------------|
| 3539                     | Q9DCL2           | 3                    | 10             | 23.8                  | 160    | 18418 | 4.8  | MIP18 family protein FAM96A                                                                                                |
| 3539                     | Q9H5X1           | 3                    | 10             | 23.8                  | 160    | 18355 | 4.9  | MIP18 family protein FAM96A                                                                                                |
| 3540                     | Q8R2U6           | 3                    | 5              | 21.8                  | 179    | 20156 | 6.4  | Diphosphoinositol polyphosphate phosphohydrolase 2                                                                         |
| 3540                     | Q9NZJ9           | 3                    | 5              | 21.7                  | 180    | 20306 | 6.4  | Diphosphoinositol polyphosphate phosphohydrolase 2                                                                         |
| 3541                     | Q9WV95           | 3                    | 5              | 21.6                  | 125    | 13719 | 9.7  | Pleckstrin logy-like domain family A member 3                                                                              |
| 3541                     | Q9Y5J5           | 3                    | 5              | 21.3                  | 127    | 13891 | 9.7  | Pleckstrin logy-like domain family A member 3                                                                              |
| 3542                     | C9J212           | 3                    | 5              | 21.3                  | 164    | 18619 | 8.1  | Ubiquitin carrier protein                                                                                                  |
| 3542                     | Q9CY34           | 3                    | 5              | 18.9                  | 185    | 21110 | 6.5  | NEDD8-conjugating enzyme UBE2F                                                                                             |
| 3542                     | Q969M7           | 3                    | 5              | 18.9                  | 185    | 21077 | 6.8  | NEDD8-conjugating enzyme UBE2F                                                                                             |
| 3542                     | Q969M7-2         | 3                    | 5              | 16.6                  | 211    | 23760 | 8    | Isoform 2 of NEDD8-conjugating enzyme UBE2F                                                                                |
| 3543                     | O15525           | 3                    | 3              | 19.8                  | 162    | 17850 | 10   | Transcription factor MafG                                                                                                  |
| 3543                     | O54790           | 3                    | 3              | 19.8                  | 162    | 17877 | 10   | Transcription factor MafG                                                                                                  |
| 3544                     | Q9BQ15           | 3                    | 5              | 21.3                  | 211    | 22338 | 9.1  | SOSS complex subunit B1                                                                                                    |
| 3544                     | Q8R2Y9           | 3                    | 5              | 21.2                  | 212    | 22628 | 9.1  | SOSS complex subunit B1                                                                                                    |
| 3544                     | E9Q199           | 3                    | 5              | 19.7                  | 228    | 24284 | 8.7  | Uncharacterized protein                                                                                                    |
| 3545                     | B7ZNK7           | 3                    | 5              | 18.9                  | 196    | 21872 | 6.4  | Aes protein                                                                                                                |
| 3545                     | UPI0000231C8F    | 3                    | 5              | 18.9                  | 196    | 21842 | 6.4  | amino-terminal enhancer of split isoform c                                                                                 |
| 3545                     | Q08117           | 3                    | 5              | 18.8                  | 197    | 21970 | 6.4  | Amino-terminal enhancer of split                                                                                           |
| 3545                     | P63002           | 3                    | 5              | 18.8                  | 197    | 22000 | 6.4  | Amino-terminal enhancer of split                                                                                           |
| 3546                     | B4DRD6           | 3                    | 19             | 18.1                  | 177    | 19167 | 10.8 | cDNA FLJ54804, highly similar to Histone H1.0                                                                              |
| 3546                     | Q8C1Y3           | 3                    | 19             | 17.9                  | 179    | 19253 | 10.2 | Putative uncharacterized protein                                                                                           |
| 3546                     | Q3U4Y0           | 3                    | 19             | 16.5                  | 194    | 20847 | 10.9 | Putative uncharacterized protein                                                                                           |
| 3546                     | P10922           | 3                    | 19             | 16.5                  | 194    | 20861 | 10.9 | Histone H1.0                                                                                                               |
| 3546                     | P07305           | 3                    | 19             | 16.5                  | 194    | 20863 | 10.8 | Histone H1.0                                                                                                               |
| 3547                     | Q9R1Q8           | 3                    | 23             | 18.1                  | 199    | 22471 | 7.3  | Transgelin-3                                                                                                               |
| 3547                     | Q9UI15           | 3                    | 23             | 18.1                  | 199    | 22473 | 7.3  | Transgelin-3                                                                                                               |
| 3548                     | B4DJG8           | 3                    | 3              | 17.4                  | 172    | 19100 | 6.2  | cDNA FLJ57117, highly similar to Charged multivesicular body protein 2b                                                    |
| 3548                     | Q9UCN3           | 3                    | 3              | 14.1                  | 213    | 23907 | 8.8  | Charged multivesicular body protein 2b                                                                                     |
| 3548                     | Q8BJF9           | 3                    | 3              | 14.1                  | 213    | 23935 | 8.8  | Charged multivesicular body protein 2b                                                                                     |
| 3549                     | C9J3J3           | 3                    | 4              | 16.9                  | 284    | 31973 | 4.9  | Uncharacterized protein                                                                                                    |
| 3549                     | Q9NXR7-4         | 3                    | 4              | 12.8                  | 376    | 42697 | 5.4  | Isoform 4 of BRCA1-A complex subunit BRE                                                                                   |
| 3549                     | Q9NXR7-3         | 3                    | 4              | 12.7                  | 379    | 43224 | 6.2  | Isoform 3 of BRCA1-A complex subunit BRE                                                                                   |
| 3549                     | Q9NXR7           | 3                    | 4              | 12.5                  | 383    | 43552 | 5.8  | BRCA1-A complex subunit BRE                                                                                                |
| 3549                     | Q8K3W0           | 3                    | 4              | 12.5                  | 383    | 43545 | 5.9  | BRCA1-A complex subunit BRE                                                                                                |
| 3549                     | D3Z7P0           | 3                    | 4              | 12.5                  | 385    | 43750 | 6.2  | Uncharacterized protein                                                                                                    |
| 3549                     | Q9NXR7-1         | 3                    | 4              | 11.6                  | 415    | 46974 | 6.1  | Isoform 1 of BRCA1-A complex subunit BRE                                                                                   |
| 3550                     | D6RH17           | 3                    | 5              | 21.3                  | 249    | 28869 | 5.9  | Uncharacterized protein                                                                                                    |
| 3550                     | E9PDB6           | 3                    | 5              | 19.2                  | 276    | 32101 | 8.4  | Uncharacterized protein                                                                                                    |
| 3550                     | A8K6Q5           | 3                    | 5              | 16.4                  | 323    | 37633 | 7.2  | cDNA FLJ77327, highly similar to sapiens cyclin H (CCNH), mRNA                                                             |
| 3550                     | Q61458           | 3                    | 5              | 16.4                  | 323    | 37506 | 7.1  | Cyclin-H                                                                                                                   |
| 3550                     | P51946           | 3                    | 5              | 16.4                  | 323    | 37643 | 7.2  | Cyclin-H                                                                                                                   |
| 3550                     | Q3UUW5           | 3                    | 5              | 16.2                  | 327    | 38048 | 8.7  | Putative uncharacterized protein                                                                                           |
| 3551                     | C9JJQ5           | 3                    | 3              | 23.5                  | 149    | 17041 | 7.1  | Uncharacterized protein                                                                                                    |
| 3551                     | A4D1S5           | 3                    | 3              | 16.1                  | 217    | 24400 | 6.5  | Ras-related protein Rab-19                                                                                                 |
| 3551                     | P35294           | 3                    | 3              | 16.1                  | 217    | 24398 | 6.4  | Ras-related protein Rab-19                                                                                                 |
| 3552                     | P35283           | 3                    | 4              | 15.2                  | 243    | 27329 | 8.4  | Ras-related protein Rab-12                                                                                                 |
| 3552                     | Q6IQ22           | 3                    | 4              | 15.2                  | 244    | 27248 | 8.4  | Ras-related protein Rab-12                                                                                                 |
| 3553                     | Q6UW46           | 3                    | 28             | 14.3                  | 315    | 35963 | 5.3  | VGFW2523                                                                                                                   |
| 3553                     | Q80WW9           | 3                    | 28             | 14.3                  | 315    | 35977 | 5.3  | DDRKG domain-containing protein 1                                                                                          |
| 3554                     | Q8NG11-2         | 3                    | 4              | 15                    | 253    | 28877 | 6.8  | Isoform 2 of Tetraspanin-14                                                                                                |
| 3554                     | Q8NG11           | 3                    | 4              | 14.1                  | 270    | 30691 | 6.8  | Tetraspanin-14                                                                                                             |
| 3554                     | Q8QZY6           | 3                    | 4              | 14.1                  | 270    | 30674 | 6.5  | Tetraspanin-14                                                                                                             |
| 3555                     | Q8BK26-2         | 3                    | 6              | 16.6                  | 211    | 24794 | 5.1  | Isoform 2 of F-box only protein 44                                                                                         |
| 3555                     | E9PUJ0           | 3                    | 6              | 16.1                  | 218    | 25446 | 5.2  | Uncharacterized protein                                                                                                    |
| 3555                     | A2A7H5           | 3                    | 6              | 13.7                  | 255    | 29792 | 5.7  | F-box protein 44                                                                                                           |
| 3555                     | Q9H4M3           | 3                    | 6              | 13.7                  | 255    | 29747 | 5.8  | F-box only protein 44                                                                                                      |
| 3555                     | Q8BK26           | 3                    | 6              | 13.7                  | 255    | 29723 | 5.5  | F-box only protein 44                                                                                                      |
| 3555                     | B7ZAN2           | 3                    | 6              | 13.7                  | 255    | 29689 | 6    | cDNA, FLJ79246, highly similar to F-box only protein 44                                                                    |
| 3556                     | UPI0000456571    | 3                    | 5              | 13.2                  | 228    | 26510 | 5.7  | Protein CWC15 log.                                                                                                         |
| 3556                     | Q9JHS9           | 3                    | 5              | 13.1                  | 229    | 26624 | 5.7  | Protein CWC15 log                                                                                                          |
| 3556                     | Q9P013           | 3                    | 5              | 13.1                  | 229    | 26624 | 5.7  | Protein CWC15 log                                                                                                          |
| 3557                     | Q5JQF8           | 3                    | 18             | 13                    | 200    | 22799 | 9.1  | Polyadenylate-binding protein 1-like 2                                                                                     |
| 3557                     | UPI00001E40D1    | 3                    | 18             | 11.4                  | 229    | 25630 | 5.6  | PREDICTED: polyadenylate-binding protein 1-like 2-like Ras-related GTP-binding protein A Ras-related GTP-binding protein A |
| 3558                     | Q7L523           | 3                    | 4              | 12.5                  | 313    | 36566 | 7.7  | Cell division cycle 37 log (S. cerevisiae)-like 1                                                                          |
| 3559                     | B1AL69           | 3                    | 6              | 11.7                  | 308    | 35580 | 5.7  | Isoform 2 of Hsp90 co-chaperone Cdc37-like 1                                                                               |
| 3559                     | Q9CZP7-2         | 3                    | 6              | 11.7                  | 307    | 35407 | 5.9  | Isoform 3 of Hsp90 co-chaperone Cdc37-like 1                                                                               |
| 3559                     | Q9CZP7-3         | 3                    | 6              | 11.6                  | 310    | 35812 | 6.1  | Isoform 4 of Hsp90 co-chaperone Cdc37-like 1                                                                               |
| 3559                     | Q9CZP7-4         | 3                    | 6              | 11.5                  | 312    | 36037 | 5.9  | Isoform 4 of Hsp90 co-chaperone Cdc37-like 1                                                                               |
| 3559                     | Q9CZP7           | 3                    | 6              | 10.7                  | 335    | 38439 | 5.4  | Hsp90 co-chaperone Cdc37-like 1                                                                                            |
| 3559                     | Q7L3B6           | 3                    | 6              | 10.7                  | 337    | 38835 | 5.3  | Hsp90 co-chaperone Cdc37-like 1                                                                                            |
| 3560                     | E9Q7N7           | 3                    | 8              | 11.7                  | 239    | 28128 | 9.6  | Uncharacterized protein                                                                                                    |
| 3560                     | Q8BVJ2           | 3                    | 8              | 11.7                  | 239    | 28163 | 9.6  | Putative uncharacterized protein                                                                                           |
| 3560                     | Q9CSF1           | 3                    | 8              | 11.4                  | 245    | 28332 | 9.1  | Putative uncharacterized protein (Fragment)                                                                                |
| 3560                     | Q8R5B7           | 3                    | 8              | 5.5                   | 508    | 57241 | 7    | General transcription factor IIF, polypeptide 1                                                                            |
| 3560                     | Q6IBK5           | 3                    | 8              | 5.4                   | 517    | 58226 | 7.5  | GTF2F1 protein                                                                                                             |
| 3560                     | P35269           | 3                    | 8              | 5.4                   | 517    | 58241 | 7.5  | General transcription factor IIF subunit 1                                                                                 |
| 3561                     | D3YWT0           | 3                    | 3              | 16.5                  | 170    | 19569 | 9.5  | Uncharacterized protein                                                                                                    |
| 3561                     | Q9R0P6           | 3                    | 3              | 15.6                  | 179    | 20626 | 9.3  | Signal peptidase complex catalytic subunit SEC11A                                                                          |
| 3561                     | Q6IAM7           | 3                    | 3              | 15.6                  | 179    | 20611 | 9.5  | SPC18 protein                                                                                                              |
| 3561                     | P67812           | 3                    | 3              | 15.6                  | 179    | 20625 | 9.5  | Signal peptidase complex catalytic subunit SEC11A                                                                          |
| 3561                     | D3Z569           | 3                    | 3              | 14.7                  | 190    | 21868 | 9.2  | Sec11-like 1 (S. cerevisiae), isoform CRA_e                                                                                |
| 3561                     | D3YTS1           | 3                    | 3              | 11.3                  | 247    | 27931 | 7.7  | Sec11-like 1 (S. cerevisiae), isoform CRA_d                                                                                |
| 3562                     | Q80UY2           | 3                    | 20             | 11                    | 381    | 41791 | 5.8  | E3 ubiquitin-protein ligase KCMF1                                                                                          |
| 3562                     | Q9P0J7           | 3                    | 20             | 11                    | 381    | 41945 | 5.7  | E3 ubiquitin-protein ligase KCMF1                                                                                          |
| 3563                     | Q8CIP2           | 3                    | 9              | 17.1                  | 251    | 27450 | 8.5  | Transcription factor Pax8 (Fragment)                                                                                       |
| 3563                     | Q06710-5         | 3                    | 9              | 15                    | 287    | 31044 | 8.6  | Isoform 5 of Paired box protein Pax-8                                                                                      |
| 3563                     | Q06710-4         | 3                    | 9              | 13.4                  | 321    | 34909 | 8.5  | Isoform 4 of Paired box protein Pax-8                                                                                      |
| 3563                     | Q06710-2         | 3                    | 9              | 11.1                  | 387    | 41741 | 8.4  | Isoform 2 of Paired box protein Pax-8                                                                                      |
| 3563                     | Q06710-3         | 3                    | 9              | 10.8                  | 398    | 43028 | 8.8  | Isoform 3 of Paired box protein Pax-8                                                                                      |
| 3563                     | A2AIU6           | 3                    | 9              | 10.5                  | 411    | 44760 | 8.7  | Paired box gene 8 (Fragment)                                                                                               |
| 3563                     | UPI00015E0A1A    | 3                    | 9              | 9.6                   | 450    | 48075 | 7.6  | Paired box protein Pax-8                                                                                                   |
| 3563                     | Q06710           | 3                    | 9              | 9.6                   | 450    | 48218 | 7.8  | Paired box protein Pax-8                                                                                                   |
| 3563                     | Q6GU20           | 3                    | 9              | 9.4                   | 457    | 48793 | 7.8  | Paired box gene 8                                                                                                          |
| 3563                     | Q00288           | 3                    | 9              | 9.4                   | 457    | 48851 | 7.6  | Paired box protein Pax-8                                                                                                   |
| 3564                     | D3YUS1           | 3                    | 6              | 18.9                  | 244    | 28166 | 7.2  | Uncharacterized protein                                                                                                    |
| 3564                     | Q8BM63           | 3                    | 6              | 17.2                  | 267    | 30466 | 6.5  | Putative uncharacterized protein (Fragment)                                                                                |
| 3564                     | UPI0001COB3B3    | 3                    | 6              | 14.1                  | 327    | 37383 | 6.5  | 5'-AMP-activated protein kinase subunit gamma-2 isoform 2                                                                  |
| 3564                     | Q91WGS-2         | 3                    | 6              | 14.1                  | 326    | 37360 | 6.5  | Isoform B of 5'-AMP-activated protein kinase subunit gamma-2                                                               |
| 3564                     | Q3TMN8           | 3                    | 6              | 14.1                  | 326    | 37312 | 6.5  | Putative uncharacterized protein                                                                                           |
| 3564                     | Q9UGJ0-2         | 3                    | 6              | 14                    | 328    | 37509 | 6.3  | Isoform B of 5'-AMP-activated protein kinase subunit gamma-2                                                               |

Table S1. Proteins identified in the OVCAR-3 tumor supernatant by two or more unique peptides.

| Protein or Protein Group | Accession Number | Unique Peptide Count | Spectrum Count | Sequence Coverage (%) | Length | MolWt  | pI  | Descriptive Name                                                                                              |
|--------------------------|------------------|----------------------|----------------|-----------------------|--------|--------|-----|---------------------------------------------------------------------------------------------------------------|
|                          |                  |                      |                |                       |        |        |     | cDNA FLJ54740, highly similar to 5'-AMP-activated protein kinase                                              |
| 3564                     | B7Z6X8           | 3                    | 6              | 10.4                  | 444    | 50122  | 8.2 | subunit gamma-2                                                                                               |
| 3564                     | Q8BIQ9           | 3                    | 6              | 10.4                  | 443    | 49981  | 8.4 | Putative uncharacterized protein                                                                              |
| 3564                     | E9PGP6           | 3                    | 6              | 10.3                  | 445    | 50251  | 7.9 | Uncharacterized protein                                                                                       |
| 3564                     | Q9UGJ0           | 3                    | 6              | 8.1                   | 569    | 63066  | 9.3 | 5'-AMP-activated protein kinase subunit gamma-2                                                               |
| 3564                     | Q91WGS           | 3                    | 6              | 8.1                   | 566    | 62997  | 9.4 | 5'-AMP-activated protein kinase subunit gamma-2                                                               |
|                          |                  |                      |                |                       |        |        |     | Protein kinase, AMP-activated, gamma 2 non-catalytic subunit, isoform CRA_c                                   |
| 3564                     | Q3U4D5           | 3                    | 6              | 8.1                   | 566    | 62921  | 9.4 | Uncharacterized protein                                                                                       |
| 3564                     | E9QK80           | 3                    | 6              | 8.1                   | 566    | 62949  | 9.4 | Uncharacterized protein                                                                                       |
| 3565                     | P36959           | 3                    | 7              | 9.9                   | 345    | 37419  | 7.1 | GMP reductase 1                                                                                               |
| 3565                     | Q9DCZ1           | 3                    | 7              | 9.9                   | 345    | 37482  | 7.1 | GMP reductase 1                                                                                               |
| 3566                     | E7EVU3           | 3                    | 4              | 9.6                   | 407    | 47337  | 5.5 | Uncharacterized protein                                                                                       |
|                          |                  |                      |                |                       |        |        |     | cDNA FLJ10938 fis, clone OVARC1001038, highly similar to Protein triadine-2 log                               |
| 3566                     | B3KMG5           | 3                    | 4              | 9.3                   | 418    | 48552  | 5.1 | E3 ubiquitin-protein ligase ARIH2                                                                             |
| 3566                     | Q9Z1K6           | 3                    | 4              | 7.9                   | 492    | 57697  | 5.7 | Ariadne log 2 variant (Fragment)                                                                              |
| 3566                     | Q53ET9           | 3                    | 4              | 7.9                   | 493    | 57801  | 5.6 | E3 ubiquitin-protein ligase ARIH2                                                                             |
| 3566                     | O95376           | 3                    | 4              | 7.9                   | 493    | 57819  | 5.6 | Chromobox protein log 8                                                                                       |
| 3567                     | Q9QXV1           | 3                    | 3              | 9.9                   | 362    | 39860  | 9.9 | Chromobox protein log 8                                                                                       |
| 3567                     | Q9HC52           | 3                    | 3              | 9.3                   | 389    | 43396  | 9.9 | Uncharacterized protein                                                                                       |
| 3568                     | A8MTG3           | 3                    | 11             | 9.2                   | 447    | 47749  | 9.1 | 49 kDa zinc finger protein                                                                                    |
| 3568                     | Q9Z326           | 3                    | 11             | 8.9                   | 460    | 49409  | 9.1 | Isoform 2 of Zinc finger protein 207                                                                          |
| 3568                     | O43670-2         | 3                    | 11             | 8.9                   | 463    | 49692  | 9.1 | Putative uncharacterized protein                                                                              |
| 3568                     | Q99LA2           | 3                    | 11             | 8.8                   | 464    | 49792  | 9.1 | Zinc finger protein 207                                                                                       |
| 3568                     | O43670           | 3                    | 11             | 8.6                   | 478    | 50751  | 9.1 | Uncharacterized protein                                                                                       |
| 3568                     | E9PW12           | 3                    | 11             | 8.6                   | 479    | 50850  | 9.1 | Putative uncharacterized protein                                                                              |
| 3568                     | Q9JMD0           | 3                    | 11             | 8.3                   | 495    | 52793  | 9.1 | Zinc finger protein 207 variant (Fragment)                                                                    |
| 3568                     | Q59G94           | 3                    | 11             | 8.3                   | 496    | 52856  | 9   | Zinc finger protein 207, isoform CRA_a                                                                        |
| 3568                     | E1P660           | 3                    | 11             | 8.3                   | 494    | 52694  | 9.1 | Isoform 2 of TBC1 domain family member 13                                                                     |
| 3569                     | Q9NVG8-2         | 3                    | 3              | 13.1                  | 275    | 32171  | 5.6 | TBC1 domain family, member 13                                                                                 |
| 3569                     | A7E2E7           | 3                    | 3              | 9                     | 400    | 46598  | 5.3 | TBC1 domain family member 13                                                                                  |
| 3569                     | Q9NVG8           | 3                    | 3              | 9                     | 400    | 46554  | 5.2 | TBC1 domain family member 13                                                                                  |
| 3569                     | Q8R3D1           | 3                    | 3              | 9                     | 400    | 46453  | 5.4 | TBC1 domain family member 13                                                                                  |
| 3569                     | B9ECJ8           | 3                    | 3              | 9                     | 400    | 46526  | 5.2 | TBC1 domain family, member 13                                                                                 |
| 3570                     | O60535           | 3                    | 3              | 18.5                  | 200    | 22270  | 8.1 | Antigen NY-CO-41 (Fragment)                                                                                   |
| 3570                     | Q9UBB5-2         | 3                    | 3              | 14.1                  | 262    | 29168  | 9.1 | Isoform 2 of Methyl-CpG-binding domain protein 2                                                              |
| 3570                     | Q9UBB5           | 3                    | 3              | 9                     | 411    | 43255  | 10  | Methyl-CpG-binding domain protein 2                                                                           |
| 3570                     | E9QMV9           | 3                    | 3              | 8.9                   | 414    | 43501  | 10  | Uncharacterized protein                                                                                       |
| 3570                     | Q9Z2E1           | 3                    | 3              | 8.9                   | 414    | 43543  | 10  | Methyl-CpG-binding domain protein 2                                                                           |
| 3571                     | Q13573           | 3                    | 6              | 8.8                   | 536    | 61495  | 9.5 | SNW domain-containing protein 1                                                                               |
| 3571                     | UPI00001B2443    | 3                    | 6              | 8.8                   | 536    | 61462  | 9.5 | SNW domain-containing protein 1                                                                               |
| 3571                     | Q9CSN1           | 3                    | 6              | 8.8                   | 536    | 61476  | 9.5 | SNW domain-containing protein 1                                                                               |
| 3571                     | Q6I9S2           | 3                    | 6              | 8.8                   | 536    | 61449  | 9.5 | SNW1 protein                                                                                                  |
| 3572                     | Q8CDZ9           | 3                    | 8              | 15.6                  | 224    | 25538  | 8.6 | Putative uncharacterized protein (Fragment)                                                                   |
| 3572                     | UPI0001F78E95    | 3                    | 8              | 13.7                  | 255    | 29201  | 8.8 | UPI0001F78E95 UniRef100 entry                                                                                 |
| 3572                     | Q921T1           | 3                    | 8              | 13.7                  | 255    | 29087  | 8.5 | Tgfb2 protein                                                                                                 |
| 3572                     | Q3TWH5           | 3                    | 8              | 10.3                  | 341    | 39315  | 8.8 | Putative uncharacterized protein (Fragment)                                                                   |
|                          |                  |                      |                |                       |        |        |     | cDNA, FLJ93591, highly similar to sapiens transforming growth factor, beta 2 (TGFB2), mRNA                    |
| 3572                     | B2R7T2           | 3                    | 8              | 8.5                   | 414    | 47778  | 8.5 | Transforming growth factor, beta 2                                                                            |
| 3572                     | Q91VP5           | 3                    | 8              | 8.5                   | 414    | 47589  | 8.4 | Transforming growth factor beta-2                                                                             |
| 3572                     | P61812           | 3                    | 8              | 8.5                   | 414    | 47748  | 8.5 | Transforming growth factor beta-2                                                                             |
| 3572                     | P27090           | 3                    | 8              | 8.5                   | 414    | 47602  | 8.5 | Transforming growth factor beta-2                                                                             |
| 3572                     | P61812-2         | 3                    | 8              | 7.9                   | 442    | 50573  | 8.4 | Isoform B of Transforming growth factor beta-2                                                                |
| 3573                     | Q9H368           | 3                    | 5              | 16.1                  | 223    | 25546  | 4.5 | PRO1670                                                                                                       |
| 3573                     | O88895-2         | 3                    | 5              | 15.5                  | 233    | 26906  | 5.1 | Isoform Short of Histone deacetylase 3                                                                        |
| 3573                     | O88895           | 3                    | 5              | 8.5                   | 424    | 48364  | 5.3 | Histone deacetylase 3                                                                                         |
| 3573                     | O15379           | 3                    | 5              | 8.4                   | 428    | 48848  | 5.2 | Histone deacetylase 3                                                                                         |
| 3573                     | Q9JM08           | 3                    | 5              | 8.4                   | 428    | 48891  | 5.2 | Histone deacetylase                                                                                           |
| 3573                     | O15379-2         | 3                    | 5              | 8.4                   | 429    | 49111  | 5.3 | Isoform 2 of Histone deacetylase 3                                                                            |
| 3574                     | P27601           | 3                    | 5              | 7.7                   | 377    | 44055  | 8.2 | Guanine nucleotide-binding protein subunit alpha-13                                                           |
| 3574                     | Q3UE40           | 3                    | 5              | 7.7                   | 377    | 44039  | 8.2 | Putative uncharacterized protein                                                                              |
| 3574                     | Q14344           | 3                    | 5              | 7.7                   | 377    | 44050  | 8   | Guanine nucleotide-binding protein subunit alpha-13                                                           |
|                          |                  |                      |                |                       |        |        |     | cDNA FLJ53876, highly similar to sapiens ADP-ribosylation factor-like 6 interacting protein 2 (ARL6IP2), mRNA |
| 3575                     | B7Z1X2           | 3                    | 8              | 7.4                   | 566    | 65005  | 6.8 | cDNA FLJ51152, highly similar to sapiens ADP-ribosylation factor-like 6 interacting protein 2 (ARL6IP2), mRNA |
|                          |                  |                      |                |                       |        |        |     | Isoform 2 of Atilastin-2                                                                                      |
| 3575                     | B7Z7X8           | 3                    | 8              | 7.4                   | 565    | 64522  | 5.7 | Atilastin-2                                                                                                   |
| 3575                     | Q8NHH9-2         | 3                    | 8              | 7.3                   | 579    | 66087  | 6.1 | Atilastin-2                                                                                                   |
| 3575                     | Q8NHH9           | 3                    | 8              | 7.2                   | 583    | 66229  | 5.5 | Atilastin-2                                                                                                   |
| 3575                     | Q6PA06           | 3                    | 8              | 7.2                   | 583    | 66224  | 5.4 | Atilastin-2                                                                                                   |
|                          |                  |                      |                |                       |        |        |     | cDNA FLJ58199, highly similar to Fragile X mental retardation syndrome-related protein 1                      |
| 3576                     | B4DM78           | 3                    | 13             | 7.3                   | 565    | 63033  | 6.8 | Uncharacterized protein                                                                                       |
| 3576                     | E7ERF5           | 3                    | 13             | 7.3                   | 565    | 62991  | 6.8 | fragile X mental retardation gene 1, autosomal log                                                            |
| 3576                     | UPI0001F79065    | 3                    | 13             | 6.3                   | 650    | 72849  | 6.3 | Isoform G of Fragile X mental retardation syndrome-related protein 1                                          |
|                          |                  |                      |                |                       |        |        |     | Isoform C of Fragile X mental retardation syndrome-related protein 1                                          |
| 3576                     | Q61584-7         | 3                    | 13             | 6.3                   | 651    | 73358  | 8   | Isoform C of Fragile X mental retardation syndrome-related protein 1                                          |
|                          |                  |                      |                |                       |        |        |     | Isoform B of Fragile X mental retardation syndrome-related protein 1                                          |
| 3576                     | Q61584-4         | 3                    | 13             | 6.3                   | 650    | 72814  | 6.3 | Isoform B of Fragile X mental retardation syndrome-related protein 1                                          |
| 3576                     | UPI0001F79064    | 3                    | 13             | 6.1                   | 676    | 76110  | 7.3 | UPI0001F79064 UniRef100 entry                                                                                 |
| 3576                     | UPI0001F79063    | 3                    | 13             | 6.1                   | 677    | 76185  | 7.1 | UPI0001F79063 UniRef100 entry                                                                                 |
|                          |                  |                      |                |                       |        |        |     | Isoform B of Fragile X mental retardation syndrome-related protein 1                                          |
| 3576                     | Q61584-3         | 3                    | 13             | 6.1                   | 677    | 76207  | 7.5 | Isoform B of Fragile X mental retardation syndrome-related protein 1                                          |
| 3576                     | Q61584           | 3                    | 13             | 6.1                   | 677    | 76222  | 7   | Fragile X mental retardation syndrome-related protein 1                                                       |
| 3577                     | A9UF08           | 3                    | 6              | 7.6                   | 406    | 44785  | 7.2 | BCR/ABL fusion protein isoform Y6                                                                             |
| 3577                     | A9UEZ4           | 3                    | 6              | 7.2                   | 429    | 47149  | 6.7 | BCR/ABL fusion protein isoform X1                                                                             |
| 3577                     | A9UEZ9           | 3                    | 6              | 7                     | 441    | 48603  | 7   | BCR/ABL fusion protein isoform X6                                                                             |
| 3577                     | A9UF04           | 3                    | 6              | 6.8                   | 454    | 49792  | 6.9 | BCR/ABL fusion protein isoform Y2                                                                             |
| 3577                     | A9UF03           | 3                    | 6              | 6.8                   | 458    | 50148  | 7.2 | BCR/ABL fusion protein isoform Y1                                                                             |
| 3577                     | A9UF01           | 3                    | 6              | 6.7                   | 465    | 51155  | 6.2 | BCR/ABL fusion protein isoform X8                                                                             |
| 3577                     | A9UF05           | 3                    | 6              | 6.6                   | 467    | 51447  | 7   | BCR/ABL fusion protein isoform Y3                                                                             |
| 3577                     | A9UF06           | 3                    | 6              | 6                     | 513    | 56232  | 6.5 | BCR/ABL fusion protein isoform Y4                                                                             |
| 3577                     | A9UEZ8           | 3                    | 6              | 6                     | 514    | 56291  | 6.3 | BCR/ABL fusion protein isoform X5                                                                             |
| 3577                     | A9UF00           | 3                    | 6              | 5.9                   | 524    | 57619  | 6.5 | BCR/ABL fusion protein isoform X7                                                                             |
| 3577                     | A9UEZ7           | 3                    | 6              | 5.9                   | 554    | 60714  | 6.4 | BCR/ABL fusion protein isoform X4                                                                             |
| 3577                     | A9UEZ5           | 3                    | 6              | 5.6                   | 557    | 60877  | 6.5 | BCR/ABL fusion protein isoform X2                                                                             |
| 3577                     | P11274-2         | 3                    | 6              | 2.5                   | 1227   | 137728 | 7.2 | Isoform 2 of Breakpoint cluster region protein                                                                |
| 3577                     | Q6PAJ1           | 3                    | 6              | 2.4                   | 1270   | 143061 | 6.9 | Breakpoint cluster region protein                                                                             |
| 3577                     | P11274           | 3                    | 6              | 2.4                   | 1271   | 142819 | 7   | Breakpoint cluster region protein                                                                             |
| 3577                     | E9PZL3           | 3                    | 6              | 2.4                   | 1270   | 143071 | 6.9 | Uncharacterized protein                                                                                       |
| 3577                     | A9UF02           | 3                    | 6              | 1.9                   | 1644   | 179322 | 8   | BCR/ABL fusion protein isoform X9                                                                             |
| 3577                     | A9UEZ6           | 3                    | 6              | 1.9                   | 1633   | 178569 | 8.3 | BCR/ABL fusion protein isoform X3                                                                             |
| 3577                     | A9UF07           | 3                    | 6              | 1.7                   | 1790   | 196571 | 8.4 | BCR/ABL fusion protein isoform Y5                                                                             |
| 3578                     | Q8WYA6-2         | 3                    | 12             | 10.6                  | 376    | 43392  | 6.2 | Isoform 2 of Beta-catenin-like protein 1                                                                      |
| 3578                     | Q0VAM0           | 3                    | 12             | 7.1                   | 563    | 65145  | 5   | Catenin, beta like 1                                                                                          |
| 3578                     | Q9CWL8           | 3                    | 12             | 7.1                   | 563    | 64980  | 5.1 | Beta-catenin-like protein 1                                                                                   |
| 3578                     | Q8WYA6           | 3                    | 12             | 7.1                   | 563    | 65173  | 5   | Beta-catenin-like protein 1                                                                                   |

Table S1. Proteins identified in the OVCAR-3 tumor supernatant by two or more unique peptides.

| Protein or Protein Group | Accession Number | Unique Peptide Count | Spectrum Count | Sequence Coverage (%) | Length | MolWt  | pI   | Descriptive Name                                                                                                       |
|--------------------------|------------------|----------------------|----------------|-----------------------|--------|--------|------|------------------------------------------------------------------------------------------------------------------------|
| 3578                     | Q3UKS4           | 3                    | 12             | 7.1                   | 563    | 65008  | 5.1  | Putative uncharacterized protein                                                                                       |
| 3578                     | Q3UJX2           | 3                    | 12             | 7.1                   | 563    | 65039  | 5    | Putative uncharacterized protein                                                                                       |
| 3579                     | Q8BWWG8-2        | 3                    | 4              | 7.1                   | 410    | 46216  | 6.4  | Isoform 1B of Beta-arrestin-1                                                                                          |
| 3579                     | P49407-2         | 3                    | 4              | 7.1                   | 410    | 46309  | 6.3  | Isoform 1B of Beta-arrestin-1                                                                                          |
| 3579                     | A8K103           | 3                    | 4              | 6.9                   | 418    | 47065  | 6.5  | cDNA FLJ75454, highly similar to sapiens arrestin, beta 1 (ARRB1), transcript variant 1, mRNA                          |
| 3579                     | Q8BWWG8          | 3                    | 4              | 6.9                   | 418    | 46973  | 6.3  | Beta-arrestin-1                                                                                                        |
| 3579                     | P49407           | 3                    | 4              | 6.9                   | 418    | 47066  | 6.2  | Beta-arrestin-1                                                                                                        |
| 3580                     | Q8CA33           | 3                    | 6              | 9.5                   | 558    | 61661  | 6.6  | Putative uncharacterized protein                                                                                       |
| 3580                     | Q9ESN6           | 3                    | 6              | 7.1                   | 744    | 81445  | 7    | Tripartite motif-containing protein 2                                                                                  |
| 3580                     | Q9C040           | 3                    | 6              | 7.1                   | 744    | 81530  | 7    | Tripartite motif-containing protein 2                                                                                  |
| 3580                     | Q3TP13           | 3                    | 6              | 7.1                   | 744    | 81427  | 7    | Putative uncharacterized protein (Fragment)                                                                            |
| 3580                     | E9QKC6           | 3                    | 6              | 6.9                   | 770    | 84319  | 7.5  | Uncharacterized protein                                                                                                |
| 3580                     | Q3URK9           | 3                    | 6              | 6.9                   | 770    | 84337  | 7.5  | Putative uncharacterized protein                                                                                       |
| 3580                     | Q5DU27           | 3                    | 6              | 6.7                   | 787    | 86182  | 7.9  | MKIAA0517 protein (Fragment)                                                                                           |
| 3581                     | Q91Y86           | 3                    | 6              | 7.6                   | 384    | 44229  | 7.7  | Mitogen-activated protein kinase 8 Mitogen-activated protein kinase 8                                                  |
| 3581                     | B5BUB8           | 3                    | 6              | 7.6                   | 384    | 44285  | 8.1  | Mitogen-activated protein kinase 8 isoform JNK1 alpha1 (Fragment)                                                      |
| 3581                     | A6P3E4           | 3                    | 6              | 7.6                   | 384    | 44022  | 7.5  | JNK1 beta1 protein kinase JNK1 beta1 protein kinase                                                                    |
| 3581                     | A1L4K2           | 3                    | 6              | 6.8                   | 427    | 48088  | 6.7  | Mitogen-activated protein kinase 8                                                                                     |
| 3581                     | UPI0000DBEFCFE   | 3                    | 6              | 6.8                   | 427    | 48178  | 6.7  | mitogen activated protein kinase 8                                                                                     |
| 3581                     | Q7TSJ7           | 3                    | 6              | 6.8                   | 427    | 48386  | 6.9  | Mapk8 protein                                                                                                          |
| 3581                     | P45983           | 3                    | 6              | 6.8                   | 427    | 48296  | 6.9  | Mitogen-activated protein kinase 8                                                                                     |
| 3582                     | Q8C9R8           | 3                    | 4              | 25.1                  | 187    | 21440  | 6.4  | Putative uncharacterized protein                                                                                       |
| 3582                     | UPI0001B791F0    | 3                    | 4              | 23                    | 204    | 23636  | 7.1  | UPI0001B791F0 UniRef100 entry                                                                                          |
| 3582                     | Q8CB11           | 3                    | 4              | 21.3                  | 221    | 24966  | 6.1  | Putative uncharacterized protein (Fragment)                                                                            |
| 3582                     | UPI0001B791EF    | 3                    | 4              | 15.9                  | 295    | 33343  | 4.8  | UPI0001B791EF UniRef100 entry                                                                                          |
| 3582                     | O54781           | 3                    | 4              | 6.9                   | 681    | 76757  | 4.9  | Serine/threonine-protein kinase SRPK2                                                                                  |
| 3582                     | P78362           | 3                    | 4              | 6.8                   | 688    | 77527  | 5    | Serine/threonine-protein kinase SRPK2                                                                                  |
| 3582                     | C9JQJ0           | 3                    | 4              | 6.7                   | 699    | 79087  | 5.1  | Uncharacterized protein                                                                                                |
| 3582                     | P78362-2         | 3                    | 4              | 6.7                   | 699    | 79029  | 5.2  | Isoform 2 of Serine/threonine-protein kinase SRPK2                                                                     |
| 3583                     | Q15428           | 3                    | 9              | 6.9                   | 464    | 49256  | 9.6  | Splicing factor 3A subunit 2                                                                                           |
| 3583                     | Q05DF2           | 3                    | 9              | 6.7                   | 481    | 51476  | 10.1 | SF3A2 protein (Fragment)                                                                                               |
| 3583                     | UPI000002186E    | 3                    | 9              | 6.6                   | 485    | 51279  | 9.6  | splicing factor 3A subunit 2                                                                                           |
| 3583                     | Q7TN25           | 3                    | 9              | 6.6                   | 485    | 51307  | 9.6  | Sf3a2 protein                                                                                                          |
| 3584                     | B3KRJ9           | 3                    | 26             | 6.6                   | 514    | 58203  | 9.9  | cDNA FLJ34439 fis, clone HLUNG2001146, highly similar to Splicing factor, arginine/serine-rich 12                      |
| 3584                     | Q8BZX4-2         | 3                    | 26             | 5.6                   | 610    | 69121  | 10.3 | Isoform 2 of Splicing regulatory glutamine/lysine-rich protein 1                                                       |
| 3585                     | Q5HZI0           | 3                    | 9              | 9.1                   | 386    | 43651  | 9.6  | Rab11fp2 protein (Fragment)                                                                                            |
| 3585                     | UPI0000194734    | 3                    | 9              | 6.8                   | 512    | 58207  | 9.5  | UPI0000194734 UniRef100 entry                                                                                          |
| 3585                     | Q7L804           | 3                    | 9              | 6.8                   | 512    | 58279  | 9.3  | Rab11 family-interacting protein 2                                                                                     |
| 3585                     | B9EID4           | 3                    | 9              | 6.6                   | 529    | 59989  | 9.3  | RAB11 family interacting protein 2 (Class I)                                                                           |
| 3585                     | Q3U366           | 3                    | 9              | 6.6                   | 529    | 60027  | 9.3  | Putative uncharacterized protein                                                                                       |
| 3585                     | Q3I768           | 3                    | 9              | 6.6                   | 532    | 60614  | 9.4  | RAB11-FIP2 long isoform                                                                                                |
| 3586                     | B7Z592           | 3                    | 5              | 6.4                   | 392    | 44891  | 7.9  | cDNA FLJ61635, highly similar to sapiens likely ortholog of immediate early response, erythropoietin 4 (LEREPO4), mRNA |
| 3586                     | Q8WU90           | 3                    | 5              | 5.9                   | 426    | 48603  | 5.3  | Zinc finger CCCH domain-containing protein 15                                                                          |
| 3586                     | Q3TIV5           | 3                    | 5              | 5.9                   | 426    | 48327  | 5.3  | Zinc finger CCCH domain-containing protein 15                                                                          |
| 3587                     | B4DVK6           | 3                    | 4              | 6.1                   | 727    | 81698  | 6.5  | ligase HECTD3                                                                                                          |
| 3587                     | E7EWG7           | 3                    | 4              | 6.1                   | 727    | 81702  | 6.5  | Uncharacterized protein                                                                                                |
| 3587                     | Q5T447           | 3                    | 4              | 5.1                   | 861    | 97113  | 5.6  | E3 ubiquitin-protein ligase HECTD3                                                                                     |
| 3587                     | Q3U487           | 3                    | 4              | 5.1                   | 861    | 97347  | 5.5  | E3 ubiquitin-protein ligase HECTD3                                                                                     |
| 3588                     | Q59G15           | 3                    | 4              | 7.3                   | 600    | 68863  | 7.7  | Dynamin 1 isoform 2 variant (Fragment)                                                                                 |
| 3588                     | B4DHH5           | 3                    | 4              | 5.6                   | 790    | 89577  | 6.8  | cDNA FLJ53472, highly similar to Dynamin-1 (EC 3.6.5.5)                                                                |
| 3588                     | Q05193-3         | 3                    | 4              | 5.2                   | 851    | 96041  | 7    | Isoform 3 of Dynamin-1                                                                                                 |
| 3588                     | P39053-5         | 3                    | 4              | 5.2                   | 851    | 96057  | 7    | Isoform 5 of Dynamin-1                                                                                                 |
| 3588                     | Q05193-4         | 3                    | 4              | 5.1                   | 856    | 96397  | 7.2  | Isoform 4 of Dynamin-1                                                                                                 |
| 3588                     | Q05193           | 3                    | 4              | 5.1                   | 864    | 97408  | 7.2  | Dynamin-1                                                                                                              |
| 3588                     | P39053-6         | 3                    | 4              | 5.1                   | 864    | 97284  | 7.7  | Isoform 6 of Dynamin-1                                                                                                 |
| 3588                     | P39053-4         | 3                    | 4              | 5.1                   | 864    | 97424  | 7.2  | Isoform 4 of Dynamin-1                                                                                                 |
| 3588                     | P39053-2         | 3                    | 4              | 5.1                   | 861    | 97281  | 7.9  | Isoform 2 of Dynamin-1                                                                                                 |
| 3588                     | P39053           | 3                    | 4              | 5.1                   | 867    | 97803  | 7.7  | Dynamin-1                                                                                                              |
| 3588                     | E9QMG2           | 3                    | 4              | 5.1                   | 861    | 97279  | 7.9  | Uncharacterized protein                                                                                                |
| 3589                     | B4DNM0           | 3                    | 3              | 5.6                   | 644    | 72783  | 4.5  | cDNA FLJ60738, highly similar to RNA polymerase-associated protein LEO1                                                |
| 3589                     | Q8WVC0           | 3                    | 3              | 5.4                   | 666    | 75404  | 4.5  | RNA polymerase-associated protein LEO1                                                                                 |
| 3589                     | Q5XJE5           | 3                    | 3              | 5.4                   | 667    | 75641  | 4.5  | RNA polymerase-associated protein LEO1                                                                                 |
| 3589                     | E9QPK8           | 3                    | 3              | 5.4                   | 667    | 75597  | 4.5  | Uncharacterized protein                                                                                                |
| 3590                     | B4DZ56           | 3                    | 6              | 5.6                   | 549    | 59246  | 6.4  | cDNA FLJ56810, highly similar to Large proline-rich protein BAT2                                                       |
| 3590                     | E7EMA1           | 3                    | 6              | 5.6                   | 549    | 59272  | 6.3  | Uncharacterized protein                                                                                                |
| 3590                     | C9JXK4           | 3                    | 6              | 5.6                   | 549    | 59288  | 6.3  | Uncharacterized protein                                                                                                |
| 3590                     | P48634-4         | 3                    | 6              | 2                     | 1533   | 163046 | 7    | Isoform 4 of Protein PRRC2A                                                                                            |
| 3590                     | C9JAP8           | 3                    | 6              | 2                     | 1533   | 163090 | 7    | Uncharacterized protein                                                                                                |
| 3590                     | Q5DTJ4           | 3                    | 6              | 1.7                   | 1796   | 191116 | 9.4  | MKIAA4178 protein (Fragment)                                                                                           |
| 3590                     | Q7TSC1           | 3                    | 6              | 1.4                   | 2158   | 229200 | 9.4  | Protein PRRC2A                                                                                                         |
| 3590                     | P48634-3         | 3                    | 6              | 1.4                   | 2156   | 229062 | 9.5  | Isoform 3 of Protein PRRC2A                                                                                            |
| 3590                     | P48634-2         | 3                    | 6              | 1.4                   | 2144   | 227837 | 9.5  | Isoform 2 of Protein PRRC2A                                                                                            |
| 3590                     | P48634           | 3                    | 6              | 1.4                   | 2157   | 228861 | 9.5  | Protein PRRC2A                                                                                                         |
| 3590                     | C9JXZ3           | 3                    | 6              | 1.4                   | 2149   | 228278 | 9.5  | Uncharacterized protein                                                                                                |
| 3590                     | C9JTM3           | 3                    | 6              | 1.4                   | 2138   | 227151 | 9.5  | Uncharacterized protein                                                                                                |
| 3590                     | C9JTL3           | 3                    | 6              | 1.4                   | 2149   | 228291 | 9.5  | Uncharacterized protein                                                                                                |
| 3590                     | C9J193           | 3                    | 6              | 1.4                   | 2149   | 228264 | 9.5  | Uncharacterized protein                                                                                                |
| 3590                     | C9J126           | 3                    | 6              | 1.4                   | 2149   | 228232 | 9.5  | Uncharacterized protein                                                                                                |
| 3590                     | C9JD87           | 3                    | 6              | 1.4                   | 2149   | 228275 | 9.5  | Uncharacterized protein                                                                                                |
| 3590                     | C9JB33           | 3                    | 6              | 1.4                   | 2138   | 227104 | 9.5  | Uncharacterized protein                                                                                                |
| 3590                     | C9J9U2           | 3                    | 6              | 1.4                   | 2138   | 227136 | 9.5  | Uncharacterized protein                                                                                                |
| 3590                     | C9J6L0           | 3                    | 6              | 1.4                   | 2138   | 227164 | 9.5  | Uncharacterized protein                                                                                                |
| 3590                     | C9J1F6           | 3                    | 6              | 1.4                   | 2138   | 227148 | 9.5  | Uncharacterized protein                                                                                                |
| 3591                     | Q14194           | 3                    | 8              | 6.3                   | 572    | 62184  | 7    | Dihydropyrimidinase-related protein 1                                                                                  |
| 3591                     | P97427           | 3                    | 8              | 6.3                   | 572    | 62168  | 7.1  | Dihydropyrimidinase-related protein 1                                                                                  |
| 3591                     | E9PD68           | 3                    | 8              | 6.3                   | 570    | 62030  | 6.7  | Uncharacterized protein                                                                                                |
| 3591                     | B3KXQ5           | 3                    | 8              | 6.3                   | 572    | 62214  | 7    | cDNA FLJ45854 fis, clone OCBBF2024589, highly similar to Dihydropyrimidinase-related protein 1                         |
| 3591                     | Q3TXY0           | 3                    | 8              | 5.5                   | 651    | 70245  | 6.6  | Putative uncharacterized protein (Fragment)                                                                            |
| 3591                     | A0EJG6           | 3                    | 8              | 5.2                   | 686    | 74262  | 6.9  | Long form collapsin response mediator protein 1                                                                        |
| 3591                     | Q6P1J1           | 3                    | 8              | 5.2                   | 686    | 74221  | 6.8  | Crmp1 protein                                                                                                          |
| 3592                     | A8K897           | 3                    | 7              | 5                     | 819    | 93382  | 5.8  | cDNA FLJ78686, highly similar to sapiens nucleoporin 93kDa (NUP93), mRNA                                               |
| 3592                     | Q8N1F7           | 3                    | 7              | 5                     | 819    | 93488  | 5.7  | Nuclear pore complex protein Nup93                                                                                     |
| 3592                     | Q8BJ71           | 3                    | 7              | 5                     | 819    | 93281  | 5.7  | Nuclear pore complex protein Nup93                                                                                     |
| 3593                     | B4E2Q6           | 3                    | 6              | 5                     | 934    | 100272 | 6.5  | cDNA FLJ54323                                                                                                          |

Table S1. Proteins identified in the OVCAR-3 tumor supernatant by two or more unique peptides.

| Protein or Protein Group | Accession Number | Unique Peptide Count | Spectrum Count | Sequence Coverage (%) | Length | MolWt  | pI  | Descriptive Name                                                                                            |
|--------------------------|------------------|----------------------|----------------|-----------------------|--------|--------|-----|-------------------------------------------------------------------------------------------------------------|
| 3593                     | Q6NXI6-2         | 3                    | 6              | 3.3                   | 1425   | 151403 | 6.9 | Isoform 2 of Regulation of nuclear pre-mRNA domain-containing protein 2                                     |
| 3593                     | Q5VT52-3         | 3                    | 6              | 3.3                   | 1435   | 152875 | 7   | Isoform 3 of Regulation of nuclear pre-mRNA domain-containing protein 2                                     |
| 3593                     | Q6NXI6           | 3                    | 6              | 3.2                   | 1469   | 156585 | 7.6 | Regulation of nuclear pre-mRNA domain-containing protein 2                                                  |
| 3593                     | Q5VT52           | 3                    | 6              | 3.2                   | 1461   | 156019 | 7.4 | Regulation of nuclear pre-mRNA domain-containing protein 2                                                  |
| 3594                     | B4DUD8           | 3                    | 8              | 4.8                   | 789    | 89015  | 6.7 | cDNA FLJ57597                                                                                               |
| 3594                     | E7ER68           | 3                    | 8              | 4.8                   | 789    | 89897  | 6.8 | Uncharacterized protein                                                                                     |
| 3594                     | Q658Y4           | 3                    | 8              | 4.5                   | 838    | 93909  | 6.4 | Protein FAM91A1                                                                                             |
| 3594                     | Q3UVG3           | 3                    | 8              | 4.5                   | 837    | 93464  | 6.4 | Protein FAM91A1                                                                                             |
| 3594                     | B6YY23           | 3                    | 8              | 4.5                   | 838    | 93969  | 6.4 | Skeletal muscle cells re-entry induced                                                                      |
| 3595                     | A2AUK6           | 3                    | 15             | 6.5                   | 631    | 70645  | 7.2 | Erythrocyte protein band 4.1-like 1                                                                         |
| 3595                     | Q9H4G0-4         | 3                    | 15             | 5.8                   | 701    | 78831  | 7.1 | Isoform 4 of Band 4.1-like protein 1                                                                        |
| 3595                     | E9PBB6           | 3                    | 15             | 5.6                   | 732    | 82004  | 6.6 | Uncharacterized protein                                                                                     |
| 3595                     | A2AUK7           | 3                    | 15             | 5.6                   | 730    | 81891  | 6.7 | Erythrocyte protein band 4.1-like 1                                                                         |
| 3595                     | Q9H4G0-3         | 3                    | 15             | 5.3                   | 772    | 86506  | 5.8 | Isoform 3 of Band 4.1-like protein 1                                                                        |
| 3595                     | Q9H4G0-2         | 3                    | 15             | 5.3                   | 779    | 87645  | 5.9 | Isoform 2 of Band 4.1-like protein 1                                                                        |
| 3595                     | E7EN13           | 3                    | 15             | 5.3                   | 772    | 86492  | 5.8 | Uncharacterized protein                                                                                     |
| 3595                     | B3KUB6           | 3                    | 15             | 5.3                   | 772    | 86474  | 5.8 | cDNA FLJ39529 fis, clone PUAEN2004067, highly similar to Band 4.1-like protein 1                            |
| 3595                     | B7Z653           | 3                    | 15             | 5.2                   | 794    | 89604  | 6.3 | cDNA FLJ61657, highly similar to Band 4.1-like protein 1                                                    |
| 3595                     | Q8C8P2           | 3                    | 15             | 4.9                   | 834    | 93532  | 5.9 | Putative uncharacterized protein                                                                            |
| 3595                     | A2AUK4           | 3                    | 15             | 4.7                   | 880    | 98495  | 5.5 | Erythrocyte protein band 4.1-like 1 (Fragment)                                                              |
| 3595                     | UPI00004542F9    | 3                    | 15             | 4.7                   | 866    | 96782  | 5.7 | band 4.1-like protein 1 isoform b                                                                           |
| 3595                     | Q9H4G0           | 3                    | 15             | 4.7                   | 881    | 98503  | 5.6 | Band 4.1-like protein 1                                                                                     |
| 3595                     | B6ZHC9           | 3                    | 15             | 4.7                   | 879    | 98285  | 5.7 | Erythrocyte protein band 4.1-like 1                                                                         |
| 3595                     | A2AUK8           | 3                    | 15             | 4.7                   | 867    | 96853  | 5.7 | Erythrocyte protein band 4.1-like 1                                                                         |
| 3595                     | A2AUK5           | 3                    | 15             | 4.7                   | 879    | 98315  | 5.7 | Erythrocyte protein band 4.1-like 1                                                                         |
| 3595                     | E9PV14           | 3                    | 15             | 3.9                   | 1064   | 117171 | 5.9 | Uncharacterized protein                                                                                     |
| 3596                     | Q9JLM8-2         | 3                    | 13             | 9.4                   | 363    | 40409  | 9.7 | Isoform 2 of Serine/threonine-protein kinase DCLK1                                                          |
| 3596                     | Q8VDT3           | 3                    | 13             | 9.4                   | 363    | 40356  | 9.6 | Dclk1 protein                                                                                               |
| 3596                     | Q80VB6           | 3                    | 13             | 9.4                   | 363    | 40381  | 9.7 | Dclk1 protein                                                                                               |
| 3596                     | Q5VZY9           | 3                    | 13             | 9.4                   | 363    | 40457  | 9.7 | Doublecortin and CaM kinase-like 1                                                                          |
| 3596                     | Q3UGP0           | 3                    | 13             | 9.4                   | 363    | 40351  | 9.7 | Putative uncharacterized protein                                                                            |
| 3596                     | Q8BRN4           | 3                    | 13             | 9                     | 379    | 42173  | 9.8 | Putative uncharacterized protein                                                                            |
| 3596                     | Q9JLM7           | 3                    | 13             | 6.5                   | 527    | 58642  | 9.3 | Double cortin and calcium/calmodulin-dependent protein kinase-like 1, isoform CRA_c                         |
| 3596                     | B7Z2T7           | 3                    | 13             | 5.5                   | 619    | 68722  | 8.7 | cDNA FLJ60535, highly similar to Serine/threonine-protein kinase DCAMK1 (EC 2.7.11.1)                       |
| 3596                     | O15075-2         | 3                    | 13             | 4.7                   | 729    | 81100  | 8.7 | Isoform 1 of Serine/threonine-protein kinase DCLK1                                                          |
| 3596                     | A3KN70           | 3                    | 13             | 4.6                   | 740    | 82192  | 8.7 | Dclk1 protein                                                                                               |
| 3596                     | O15075           | 3                    | 13             | 4.6                   | 740    | 82224  | 8.7 | Serine/threonine-protein kinase DCLK1                                                                       |
| 3596                     | Q9JLM8           | 3                    | 13             | 4.5                   | 756    | 84153  | 8.9 | Serine/threonine-protein kinase DCLK1                                                                       |
| 3596                     | Q8CHG1           | 3                    | 13             | 4.3                   | 791    | 87403  | 8.8 | MKIAA0369 protein (Fragment)                                                                                |
| 3597                     | UPI00004563E0    | 3                    | 3              | 7.9                   | 404    | 46527  | 5.6 | UPI00004563E0 UniRef100 entry                                                                               |
| 3597                     | Q9NUN4           | 3                    | 3              | 7.9                   | 404    | 46540  | 5.6 | cDNA FLJ11251 fis, clone PLACE1008813                                                                       |
| 3597                     | Q9NTA6           | 3                    | 3              | 5.4                   | 596    | 69295  | 6.2 | Putative uncharacterized protein DKFZp76112124 (Fragment)                                                   |
| 3597                     | A5YP36           | 3                    | 3              | 4.6                   | 701    | 81880  | 6.4 | SEC15-like protein 3                                                                                        |
| 3597                     | E7EW84           | 3                    | 3              | 4.6                   | 701    | 81852  | 6.3 | Uncharacterized protein                                                                                     |
| 3597                     | B2RDH5           | 3                    | 3              | 4.2                   | 757    | 88527  | 6.5 | cDNA, FLJ96612, highly similar to sapiens SEC15 (S. cerevisiae)-like (SEC15L), mRNA                         |
| 3597                     | Q8TAG9           | 3                    | 3              | 4                     | 804    | 93722  | 6.2 | Exocyst complex component 6                                                                                 |
| 3597                     | Q8R313           | 3                    | 3              | 4                     | 802    | 93077  | 6.2 | Exocyst complex component 6                                                                                 |
| 3597                     | Q3U9D6           | 3                    | 3              | 4                     | 804    | 93287  | 6.2 | Putative uncharacterized protein                                                                            |
| 3597                     | E9PHI3           | 3                    | 3              | 4                     | 799    | 93407  | 6   | Uncharacterized protein                                                                                     |
| 3597                     | B4DEZ1           | 3                    | 3              | 4                     | 796    | 92990  | 6.3 | cDNA FLJ55550, highly similar to Exocyst complex component 6                                                |
| 3597                     | B3KXY5           | 3                    | 3              | 4                     | 799    | 93433  | 6   | cDNA FLJ46316 fis, clone TEST14041482, highly similar to Exocyst complex component 6                        |
| 3597                     | B7Z6G5           | 3                    | 3              | 3.9                   | 820    | 95348  | 6.1 | Exocyst complex component 6                                                                                 |
| 3598                     | UPI0001889E45    | 3                    | 4              | 13.4                  | 246    | 28784  | 5.7 | cDNA FLJ56022, highly similar to Exocyst complex component 6                                                |
| 3598                     | Q3UUZ6           | 3                    | 4              | 9                     | 366    | 42710  | 6.8 | UPI0001889E45 UniRef100 entry                                                                               |
| 3598                     | E9Q272           | 3                    | 4              | 4.6                   | 720    | 83402  | 5.2 | Putative uncharacterized protein (Fragment)                                                                 |
| 3598                     | Q8BUK6           | 3                    | 4              | 4.6                   | 718    | 83218  | 5.2 | Uncharacterized protein                                                                                     |
| 3598                     | Q86VS8           | 3                    | 4              | 4.6                   | 718    | 83126  | 5.2 | Protein Hook log 3                                                                                          |
| 3598                     | Q5BKSS5          | 3                    | 4              | 4.6                   | 720    | 83460  | 5.2 | Protein Hook log 3                                                                                          |
| 3599                     | Q9NZQ3-5         | 3                    | 5              | 5.4                   | 596    | 64196  | 6.1 | Hook log 3 (Drosophila)                                                                                     |
| 3599                     | Q9NZQ3-4         | 3                    | 5              | 4.9                   | 651    | 70540  | 6.3 | Isoform 5 of NCK-interacting protein with SH3 domain                                                        |
| 3599                     | Q9ESJ4           | 3                    | 5              | 4.5                   | 714    | 78572  | 6.1 | Isoform 4 of NCK-interacting protein with SH3 domain                                                        |
| 3599                     | Q9NZQ3-3         | 3                    | 5              | 4.5                   | 715    | 78237  | 6.4 | NCK-interacting protein with SH3 domain                                                                     |
| 3599                     | Q9NZQ3-2         | 3                    | 5              | 4.4                   | 722    | 77931  | 6.5 | Isoform 3 of NCK-interacting protein with SH3 domain                                                        |
| 3599                     | Q9NZQ3           | 3                    | 5              | 4.4                   | 722    | 78960  | 6.4 | Isoform 2 of NCK-interacting protein with SH3 domain                                                        |
| 3600                     | B7Z1Q9           | 3                    | 3              | 4.3                   | 912    | 100720 | 5.5 | NCK-interacting protein with SH3 domain                                                                     |
| 3600                     | D3YYN7           | 3                    | 3              | 4.1                   | 947    | 103586 | 5.4 | cDNA FLJ59485, highly similar to Sodium/potassium-transporting ATPase alpha-3 chain (EC 3.6.3.9)            |
| 3600                     | B7Z3F8           | 3                    | 3              | 4                     | 983    | 108297 | 5.3 | Uncharacterized protein                                                                                     |
| 3600                     | B7Z3U6           | 3                    | 3              | 3.9                   | 992    | 109550 | 5.3 | cDNA FLJ59543, highly similar to Sodium/potassium-transporting ATPase alpha-3 chain (EC 3.6.3.9)            |
| 3600                     | UPI0001A471A4    | 3                    | 3              | 3.8                   | 1023   | 113000 | 5.5 | ATPase, Na <sup>+</sup> /K <sup>+</sup> transporting, alpha 1 polypeptide, isoform CRA_a                    |
| 3600                     | Q6ZQ49           | 3                    | 3              | 3.8                   | 1022   | 112291 | 5.6 | sodium/potassium-transporting ATPase subunit alpha-1 isoform c                                              |
| 3600                     | Q6PIE5           | 3                    | 3              | 3.8                   | 1020   | 112217 | 5.5 | MCG142115, isoform CRA_b (Fragment)                                                                         |
| 3600                     | Q6PIC6           | 3                    | 3              | 3.8                   | 1013   | 111691 | 5.4 | Sodium/potassium-transporting ATPase subunit alpha-2                                                        |
| 3600                     | Q53E50           | 3                    | 3              | 3.8                   | 1013   | 111778 | 5.4 | Sodium/potassium-transporting ATPase subunit alpha-3                                                        |
| 3600                     | P13637           | 3                    | 3              | 3.8                   | 1013   | 111748 | 5.4 | Na <sup>+</sup> /K <sup>+</sup> -ATPase alpha 3 subunit variant (Fragment)                                  |
| 3600                     | P05023           | 3                    | 3              | 3.8                   | 1023   | 112896 | 5.5 | Sodium/potassium-transporting ATPase subunit alpha-3                                                        |
| 3600                     | B7Z9V4           | 3                    | 3              | 3.8                   | 1026   | 113078 | 5.4 | Sodium/potassium-transporting ATPase subunit alpha-1                                                        |
| 3600                     | B7Z401           | 3                    | 3              | 3.8                   | 1024   | 113203 | 5.4 | cDNA, FLJ78968, highly similar to Sodium/potassium-transporting ATPase alpha-3 chain (EC 3.6.3.9)           |
| 3600                     | B7Z3V1           | 3                    | 3              | 3.8                   | 1020   | 112438 | 5.4 | cDNA FLJ54717, highly similar to Sodium/potassium-transporting ATPase alpha-3 chain (EC 3.6.3.9)            |
| 3600                     | B7Z2T5           | 3                    | 3              | 3.8                   | 1023   | 112908 | 5.5 | cDNA FLJ60077, highly similar to Sodium/potassium-transporting ATPase alpha-1 chain (EC 3.6.3.9) (Fragment) |
| 3600                     | B7Z2T0           | 3                    | 3              | 3.8                   | 1026   | 113059 | 5.4 | cDNA FLJ55427, highly similar to Sodium/potassium-transporting ATPase alpha-1 chain (EC 3.6.3.9)            |
| 3600                     | Q8VCE0           | 3                    | 3              | 3.7                   | 1053   | 115969 | 5.6 | cDNA FLJ59513, highly similar to Sodium/potassium-transporting ATPase alpha-3 chain (EC 3.6.3.9)            |
| 3600                     | E9PC51           | 3                    | 3              | 3.2                   | 1226   | 133317 | 6.1 | ATPase, Na <sup>+</sup> /K <sup>+</sup> transporting, alpha 3 polypeptide                                   |
| 3601                     | E9QM30           | 3                    | 5              | 4.2                   | 829    | 91392  | 6.3 | Uncharacterized protein                                                                                     |
| 3601                     | Q9UP83           | 3                    | 5              | 4.2                   | 839    | 92743  | 6.6 | Uncharacterized protein                                                                                     |
| 3601                     | Q8COL8           | 3                    | 5              | 4.2                   | 829    | 91601  | 6.3 | Conserved oligomeric Golgi complex subunit 5                                                                |
| 3601                     | Q9UP83-2         | 3                    | 5              | 4.1                   | 860    | 94901  | 6.6 | Conserved oligomeric Golgi complex subunit 5                                                                |
| 3602                     | Q86YB2           | 3                    | 4              | 3.9                   | 1220   | 139314 | 8.4 | Isoform 2 of Conserved oligomeric Golgi complex subunit 5                                                   |
|                          |                  |                      |                |                       |        |        |     | DEAH (Asp-Glu-Ala-His) box polypeptide 8                                                                    |

Table S1. Proteins identified in the OVCAR-3 tumor supernatant by two or more unique peptides.

| Protein or Protein Group | Accession Number | Unique Peptide Count | Spectrum Count | Sequence Coverage (%) | Length | MolWt  | pI  | Descriptive Name                                                                                                                  |
|--------------------------|------------------|----------------------|----------------|-----------------------|--------|--------|-----|-----------------------------------------------------------------------------------------------------------------------------------|
| 3602                     | Q86X36           | 3                    | 4              | 3.9                   | 1220   | 139287 | 8.1 | DEAH (Asp-Glu-Ala-His) box polypeptide 8                                                                                          |
| 3602                     | Q14562           | 3                    | 4              | 3.9                   | 1220   | 139314 | 8.3 | ATP-dependent RNA helicase DHX8<br>cDNA FLJ76879, highly similar to sapiens DEAH (Asp-Glu-Ala-His) box polypeptide 8 (DHX8), mRNA |
| 3602                     | A8K6J9           | 3                    | 4              | 3.9                   | 1220   | 139384 | 8.4 | ATP-dependent RNA helicase DHX8                                                                                                   |
| 3602                     | A2A4P0           | 3                    | 4              | 3.8                   | 1244   | 142571 | 8.1 | Putative uncharacterized protein                                                                                                  |
| 3602                     | Q3UQQ4           | 3                    | 4              | 3.8                   | 1244   | 142555 | 8.1 | MKIAA4096 protein (Fragment)                                                                                                      |
| 3602                     | Q5DTN5           | 3                    | 4              | 3.7                   | 1264   | 144923 | 8.1 | Uncharacterized protein                                                                                                           |
| 3603                     | A8MY55           | 3                    | 4              | 3.4                   | 893    | 100680 | 6.5 | Isoform 2 of Focal adhesion kinase 1                                                                                              |
| 3603                     | Q05397-2         | 3                    | 4              | 3.4                   | 879    | 99358  | 6.4 | Uncharacterized protein                                                                                                           |
| 3603                     | C9JYH6           | 3                    | 4              | 3.4                   | 877    | 99107  | 6.4 | PTK2 protein tyrosine kinase 2 isoform b variant (Fragment)                                                                       |
| 3603                     | Q59GN8           | 3                    | 4              | 3.1                   | 975    | 110234 | 6.2 | PTK2 protein                                                                                                                      |
| 3603                     | Q81YN9           | 3                    | 4              | 3                     | 1006   | 114253 | 6.8 | PTK2 protein tyrosine kinase 2 isoform b variant (Fragment)                                                                       |
| 3603                     | Q59GM6           | 3                    | 4              | 3                     | 1007   | 114157 | 6.6 | UPI0001E8F580 UniRef100 entry                                                                                                     |
| 3603                     | UPI0001E8F580    | 3                    | 4              | 2.9                   | 1017   | 115563 | 6.8 | Focal adhesion kinase 1                                                                                                           |
| 3603                     | Q05397           | 3                    | 4              | 2.9                   | 1052   | 119233 | 6.6 | Isoform 3 of Focal adhesion kinase 1                                                                                              |
| 3603                     | P34152-3         | 3                    | 4              | 2.9                   | 1052   | 119243 | 6.6 | focal adhesion kinase 1 isoform c                                                                                                 |
| 3603                     | UPI0001E8F57E    | 3                    | 4              | 2.8                   | 1065   | 120900 | 6.8 | Putative uncharacterized protein DKFZp666O0110                                                                                    |
| 3603                     | Q658W2           | 3                    | 4              | 2.8                   | 1074   | 121721 | 6.6 | Isoform 4 of Focal adhesion kinase 1                                                                                              |
| 3603                     | P34152-4         | 3                    | 4              | 2.8                   | 1055   | 119682 | 6.7 | Isoform 2 of Focal adhesion kinase 1                                                                                              |
| 3603                     | P34152-2         | 3                    | 4              | 2.8                   | 1083   | 122774 | 6.7 | Focal adhesion kinase 1                                                                                                           |
| 3603                     | P34152           | 3                    | 4              | 2.8                   | 1090   | 123537 | 6.7 | Uncharacterized protein                                                                                                           |
| 3603                     | E9QP72           | 3                    | 4              | 2.8                   | 1085   | 122960 | 6.7 | cDNA FLJ61553, highly similar to Focal adhesion kinase 1 (EC 2.7.10.2)                                                            |
| 3603                     | B4E2N6           | 3                    | 4              | 2.8                   | 1065   | 120857 | 6.7 | Uncharacterized protein                                                                                                           |
| 3603                     | E9QMQ8           | 3                    | 4              | 2.7                   | 1092   | 123723 | 6.7 | DNA-directed RNA polymerase                                                                                                       |
| 3604                     | B3KV73           | 3                    | 3              | 3.3                   | 1075   | 121132 | 8.6 | DNA-directed RNA polymerase III subunit RPC2                                                                                      |
| 3604                     | Q9NW08           | 3                    | 3              | 3.2                   | 1133   | 127785 | 8.5 | DNA-directed RNA polymerase                                                                                                       |
| 3604                     | Q7Z3R8           | 3                    | 3              | 3.2                   | 1133   | 127819 | 8.5 | DNA-directed RNA polymerase III subunit RPC2                                                                                      |
| 3604                     | P59470           | 3                    | 3              | 3.2                   | 1133   | 127715 | 8.5 | cDNA FLJ61699, highly similar to sapiens androgen-induced proliferation inhibitor (APRIN), transcript variant 1, mRNA             |
| 3605                     | B7Z5S1           | 3                    | 4              | 2.8                   | 1302   | 148739 | 8.1 | Sister chromatid cohesion protein PDS5 log B                                                                                      |
| 3605                     | Q9NTI5           | 3                    | 4              | 2.6                   | 1447   | 164666 | 8.5 | Isoform 3 of Sister chromatid cohesion protein PDS5 log B                                                                         |
| 3605                     | Q4VA53-3         | 3                    | 4              | 2.6                   | 1448   | 164673 | 8.5 | Sister chromatid cohesion protein PDS5 log B                                                                                      |
| 3605                     | Q4VA53           | 3                    | 4              | 2.6                   | 1446   | 164418 | 8.5 | Uncharacterized protein                                                                                                           |
| 3605                     | E9QNG8           | 3                    | 4              | 2.6                   | 1449   | 164761 | 8.5 | Uncharacterized protein                                                                                                           |
| 3605                     | E7ENA8           | 3                    | 4              | 2.6                   | 1448   | 164753 | 8.5 | cDNA FLJ76732, highly similar to sapiens TAO kinase 3 (TAOK3), mRNA                                                               |
| 3606                     | A8K0J3           | 3                    | 3              | 2.6                   | 898    | 105331 | 7.4 | Serine/threonine-protein kinase TAO3                                                                                              |
| 3606                     | Q9H2K8           | 3                    | 3              | 2.6                   | 898    | 105406 | 7.3 | Serine/threonine-protein kinase TAO3                                                                                              |
| 3606                     | Q8BYC6           | 3                    | 3              | 2.6                   | 898    | 105336 | 7.3 | MCG125789, isoform CRA_a                                                                                                          |
| 3606                     | B2RY27           | 3                    | 3              | 2.6                   | 898    | 105364 | 7.3 | Putative uncharacterized protein (Fragment)                                                                                       |
| 3607                     | Q3US09           | 3                    | 4              | 4.6                   | 921    | 105537 | 6.5 | THO complex subunit 2                                                                                                             |
| 3607                     | B1AZI6           | 3                    | 4              | 2.6                   | 1594   | 182772 | 8.4 | THO complex subunit 2                                                                                                             |
| 3607                     | Q8NI27           | 3                    | 4              | 2.6                   | 1593   | 182774 | 8.4 | Uncharacterized protein                                                                                                           |
| 3608                     | E9QMB0           | 3                    | 3              | 2.7                   | 1163   | 132351 | 6.9 | cDNA FLJ61698, highly similar to Golgi apparatus protein 1                                                                        |
| 3608                     | B7Z8Y4           | 3                    | 3              | 2.6                   | 1192   | 135995 | 7   | Golgi apparatus protein 1                                                                                                         |
| 3608                     | Q92896           | 3                    | 3              | 2.6                   | 1179   | 134552 | 6.9 | Golgi apparatus protein 1                                                                                                         |
| 3608                     | Q61543           | 3                    | 3              | 2.6                   | 1175   | 133734 | 6.8 | Disco-interacting protein 2 log A isoform e                                                                                       |
| 3609                     | B4E0F0           | 3                    | 3              | 2.5                   | 1110   | 119516 | 8.2 | Disco-interacting protein 2 log A                                                                                                 |
| 3609                     | UPI0001989312    | 3                    | 3              | 2.5                   | 1110   | 119467 | 8.2 | Disco-interacting protein 2 log A                                                                                                 |
| 3609                     | Q8BWT5           | 3                    | 3              | 1.8                   | 1523   | 165273 | 7.7 | Uncharacterized protein                                                                                                           |
| 3609                     | Q14689           | 3                    | 3              | 1.8                   | 1571   | 170368 | 8   | Isoform 2 of Spectrin beta chain, brain 3                                                                                         |
| 3609                     | E9QP22           | 3                    | 3              | 1.8                   | 1562   | 169519 | 7.8 | Beta spectrin IV                                                                                                                  |
| 3609                     | E9PER1           | 3                    | 3              | 1.8                   | 1572   | 170439 | 8   | Isoform 4 of Spectrin beta chain, brain 3                                                                                         |
| 3609                     | E0CXM7           | 3                    | 3              | 1.8                   | 1523   | 165254 | 7.6 | Spectrin beta chain, brain 3                                                                                                      |
| 3610                     | C9JRP8           | 3                    | 25             | 2.2                   | 1309   | 146120 | 5.8 | Beta-spectrin 4                                                                                                                   |
| 3610                     | Q9H254-2         | 3                    | 25             | 2.2                   | 1309   | 146168 | 5.8 | BetalV-spectrin sigma1                                                                                                            |
| 3610                     | Q71S06           | 3                    | 25             | 1.4                   | 2002   | 225564 | 5.7 | Non-erythrocytic beta-spectrin 4                                                                                                  |
| 3610                     | Q9H254-4         | 3                    | 25             | 1.3                   | 2154   | 243422 | 5.7 | Uncharacterized protein                                                                                                           |
| 3610                     | Q9H254           | 3                    | 25             | 1.1                   | 2564   | 288984 | 6   | Chromodomain-helicase-DNA-binding protein 1                                                                                       |
| 3610                     | Q91ZE6           | 3                    | 25             | 1.1                   | 2555   | 288133 | 6   | Chromodomain helicase DNA binding protein 1                                                                                       |
| 3610                     | Q8VIE5           | 3                    | 25             | 1.1                   | 2561   | 288807 | 6   | Chromodomain-helicase-DNA-binding protein 1                                                                                       |
| 3610                     | Q71S07           | 3                    | 25             | 1.1                   | 2564   | 289060 | 6.1 | Isoform 2 of Chromodomain-helicase-DNA-binding protein 1                                                                          |
| 3610                     | E9PX29           | 3                    | 25             | 1.1                   | 2561   | 288822 | 6   | cDNA: FLJ21683 fis, clone COL09335                                                                                                |
| 3611                     | O14646           | 3                    | 4              | 2                     | 1710   | 196687 | 7.1 | Myosin-Vb                                                                                                                         |
| 3611                     | Q14BJ0           | 3                    | 4              | 2                     | 1711   | 196384 | 7.4 | UPI000154773E UniRef100 entry                                                                                                     |
| 3611                     | P40201           | 3                    | 4              | 2                     | 1711   | 196410 | 7.4 | myosin-Vb                                                                                                                         |
| 3611                     | O14646-2         | 3                    | 4              | 2                     | 1709   | 196589 | 7.1 | Myosin-Vb                                                                                                                         |
| 3612                     | Q9H6Y6           | 3                    | 5              | 2.9                   | 963    | 111759 | 6.3 | Isoform 3 of Myosin-Vb                                                                                                            |
| 3612                     | P21271           | 3                    | 5              | 1.5                   | 1818   | 210569 | 7.1 | hemoglobin alpha, adult chain 1                                                                                                   |
| 3612                     | UPI000154773E    | 3                    | 5              | 1.5                   | 1844   | 213412 | 6.9 | Alpha globin 1                                                                                                                    |
| 3612                     | UPI00002160ED    | 3                    | 5              | 1.5                   | 1818   | 210545 | 7.1 | Putative uncharacterized protein                                                                                                  |
| 3612                     | Q9ULV0           | 3                    | 5              | 1.5                   | 1848   | 213671 | 7.2 | Alpha-actinin-4                                                                                                                   |
| 3612                     | P21271-3         | 3                    | 5              | 1.5                   | 1844   | 213436 | 7   | Isoform M1 of Pyruvate kinase isozymes M1/M2                                                                                      |
| 3613                     | UPI00001946D0    | 3                    | 46             | 85                    | 140    | 14932  | 8.8 | Nucleoside diphosphate kinase A                                                                                                   |
| 3613                     | Q91VB8           | 3                    | 46             | 83.8                  | 142    | 15112  | 8.2 | Protein S100-A8                                                                                                                   |
| 3613                     | Q9CY10           | 3                    | 46             | 83.8                  | 142    | 15202  | 8.8 | Macrophage migration inhibitory factor                                                                                            |
| 3614                     | P57780           | 3                    | 72             | 81.6                  | 912    | 104977 | 5.4 | Guanine nucleotide-binding protein G(I)/G(S)/G(O) subunit gamma-12                                                                |
| 3615                     | P52480-2         | 3                    | 9              | 75.9                  | 531    | 57985  | 7.1 | Uncharacterized protein                                                                                                           |
| 3616                     | P15532           | 3                    | 17             | 75.7                  | 152    | 17208  | 7.4 | Barrier-to-autointegration factor                                                                                                 |
| 3617                     | P27005           | 3                    | 23             | 73                    | 89     | 10295  | 5.7 | Copper transport protein ATOX1                                                                                                    |
| 3618                     | P34884           | 3                    | 21             | 58.3                  | 115    | 12504  | 7.3 | Glia maturation factor gamma                                                                                                      |
| 3619                     | Q9DAS9           | 3                    | 5              | 56.9                  | 72     | 7997   | 9   | PREDICTED: glia maturation factor gamma-like                                                                                      |
| 3620                     | D3YXL3           | 3                    | 5              | 51.4                  | 105    | 11697  | 6.1 | COMM domain-containing protein 6                                                                                                  |
| 3621                     | O54962           | 3                    | 29             | 48.3                  | 89     | 10103  | 6.1 | C-C motif chemokine 8                                                                                                             |
| 3622                     | O08997           | 3                    | 6              | 47.1                  | 68     | 7338   | 6.5 | Uncharacterized protein                                                                                                           |
| 3623                     | Q9ERL7           | 3                    | 8              | 45.8                  | 142    | 16748  | 5.7 | Uncharacterized protein                                                                                                           |
| 3623                     | UPI0001E6B834    | 3                    | 8              | 39.4                  | 165    | 19320  | 6.8 | Uncharacterized protein                                                                                                           |
| 3624                     | Q3V4B5           | 3                    | 8              | 41.4                  | 87     | 9795   | 5.4 | Uncharacterized protein                                                                                                           |
| 3625                     | Q9Z121           | 3                    | 10             | 41.2                  | 97     | 11017  | 8.4 | Uncharacterized protein                                                                                                           |
| 3626                     | D3YU37           | 3                    | 33             | 40.9                  | 115    | 12822  | 9.2 | PREDICTED: 60S ribosomal protein L30-like                                                                                         |
| 3626                     | UPI0000604660    | 3                    | 33             | 40.9                  | 115    | 12827  | 9.2 | Beta-actin-like protein 2                                                                                                         |
| 3627                     | Q8BFZ3           | 3                    | 19             | 40.2                  | 126    | 42004  | 5.5 | Isoform 2 of 60S ribosomal protein L22-like 1                                                                                     |
| 3628                     | Q9D7S7-2         | 3                    | 6              | 39.7                  | 371    | 14339  | 9.4 | 60S ribosomal protein L22-like 1                                                                                                  |
| 3628                     | Q9D7S7           | 3                    | 6              | 39.3                  | 371    | 14467  | 9.4 | Acylphosphatase-2                                                                                                                 |
| 3629                     | P56375           | 3                    | 5              | 39.2                  | 97     | 10895  | 8.7 | Putative uncharacterized protein                                                                                                  |
| 3630                     | Q9DAS3           | 3                    | 6              | 41.5                  | 106    | 11625  | 5.4 | Tctex-1                                                                                                                           |
| 3630                     | A1E5T5           | 3                    | 6              | 38.9                  | 113    | 12482  | 5.8 | Dynein light chain Tctex-type 1                                                                                                   |
| 3630                     | P51807           | 3                    | 6              | 38.9                  | 113    | 12483  | 5.1 | Ras-related protein Rab-8B                                                                                                        |
| 3631                     | P61028           | 3                    | 8              | 37.7                  | 207    | 23603  | 9.1 | Apolipoprotein A-II                                                                                                               |
| 3632                     | A7YL62           | 3                    | 12             | 37.3                  | 102    | 11291  | 7.2 | Apolipoprotein A-II, isoform CRA_a                                                                                                |
| 3632                     | Q3UKX6           | 3                    | 12             | 37.3                  | 102    | 11309  | 7.2 |                                                                                                                                   |

Table S1. Proteins identified in the OVCAR-3 tumor supernatant by two or more unique peptides.

| Protein or Group | Accession Number | Unique Peptide Count | Spectrum Count | Sequence Coverage (%) | Length | MolWt  | pI   | Descriptive Name                                                     |
|------------------|------------------|----------------------|----------------|-----------------------|--------|--------|------|----------------------------------------------------------------------|
| 3633             | Q8VC41           | 3                    | 4              | 37                    | 413    | 45995  | 5.4  | Serpina1d protein                                                    |
| 3634             | Q3U8P1           | 3                    | 4              | 36.6                  | 131    | 15296  | 7.3  | Putative uncharacterized protein                                     |
| 3634             | Q9ER81           | 3                    | 4              | 36.6                  | 131    | 15278  | 7.3  | 15kD interferon alpha responsive protein                             |
| 3634             | Q9D178           | 3                    | 4              | 36.6                  | 131    | 15306  | 7.3  | Putative uncharacterized protein                                     |
| 3634             | Q3UAA2           | 3                    | 4              | 36.6                  | 131    | 15250  | 7.3  | Putative uncharacterized protein                                     |
| 3635             | Q9D7F5           | 3                    | 12             | 36.1                  | 147    | 16619  | 7.3  | Ubiquitin carrier protein                                            |
| 3636             | Q8BHA3-2         | 3                    | 6              | 28.3                  | 166    | 18051  | 8.3  | Isoform 2 of Probable D-tyrosyl-tRNA(Tyr) deacylase 2                |
| 3636             | Q8BHA3           | 3                    | 6              | 28                    | 168    | 18236  | 7.9  | Probable D-tyrosyl-tRNA(Tyr) deacylase 2                             |
| 3637             | P09041           | 3                    | 8              | 27.6                  | 417    | 44883  | 6.8  | Phosphoglycerate kinase 2                                            |
| 3638             | Q08879-2         | 3                    | 13             | 27.6                  | 685    | 75284  | 5.3  | Isoform C of Fibulin-1                                               |
| 3639             | O88593           | 3                    | 5              | 26.4                  | 182    | 20489  | 7.5  | Peptidoglycan recognition protein 1                                  |
| 3640             | O88851           | 3                    | 6              | 25.8                  | 186    | 20912  | 6    | Putative hydrolase RBBP9                                             |
| 3640             | Q80YU9           | 3                    | 6              | 25.8                  | 186    | 20913  | 6    | Retinoblastoma binding protein 9                                     |
| 3641             | UPI0000195B3B    | 3                    | 7              | 25.3                  | 83     | 9512   | 4.5  | PREDICTED: small nuclear ribonucleoprotein F                         |
| 3642             | Q35658           | 3                    | 5              | 25.2                  | 278    | 31013  | 4.9  | Complement component 1 Q subcomponent-binding protein, mitochondrial |
| 3642             | Q8R5L1           | 3                    | 5              | 25.1                  | 279    | 31025  | 4.9  | Complement component 1, q subcomponent binding protein               |
| 3643             | P01831           | 3                    | 12             | 24.1                  | 162    | 18080  | 9    | Thy-1 membrane glycoprotein                                          |
| 3643             | Q53YX2           | 3                    | 12             | 24.1                  | 162    | 18108  | 9.2  | CD90.1                                                               |
| 3644             | P11404           | 3                    | 4              | 23.3                  | 133    | 14819  | 6.6  | Fatty acid-binding protein, heart                                    |
| 3645             | Q9D0J8           | 3                    | 18             | 22.8                  | 101    | 11430  | 4.2  | Parathyrimosin                                                       |
| 3645             | P04550           | 3                    | 18             | 22.5                  | 102    | 11559  | 4.2  | Parathyrimosin                                                       |
| 3645             | UPI00015DEFD8    | 3                    | 18             | 16.5                  | 139    | 15347  | 4.6  | parathyrimosin                                                       |
| 3646             | Q9DCT5           | 3                    | 4              | 22.3                  | 211    | 23159  | 7.3  | Stromal cell-derived factor 2                                        |
| 3647             | Q99JT9           | 3                    | 16             | 21.8                  | 179    | 21524  | 5.5  | 1,2-dihydroxy-3-keto-5-methylthiopentene dioxygenase                 |
| 3648             | D3Z5G7           | 3                    | 6              | 21.7                  | 567    | 62197  | 5.2  | Uncharacterized protein                                              |
| 3649             | Q91XV3           | 3                    | 3              | 21.7                  | 226    | 22087  | 4.5  | Brain acid soluble protein 1                                         |
| 3650             | Q61425           | 3                    | 3              | 21.3                  | 314    | 34464  | 8.6  | Hydroxyacyl-coenzyme A dehydrogenase, mitochondrial                  |
| 3651             | P20801           | 3                    | 3              | 21.2                  | 160    | 18110  | 4.2  | Troponin C, skeletal muscle                                          |
| 3651             | Q3UZ77           | 3                    | 3              | 21.2                  | 160    | 18134  | 4.2  | Putative uncharacterized protein                                     |
| 3652             | P56376           | 3                    | 8              | 32.3                  | 99     | 11241  | 9.1  | Acylphosphatase-1                                                    |
| 3652             | E9QJ75           | 3                    | 8              | 20.4                  | 157    | 17344  | 9.1  | Uncharacterized protein                                              |
| 3653             | P09671           | 3                    | 7              | 19.4                  | 222    | 24603  | 8.6  | Superoxide dismutase [Mn], mitochondrial                             |
| 3654             | Q9Z0Y1           | 3                    | 3              | 19.4                  | 186    | 20978  | 6    | Dynactin subunit 3                                                   |
| 3655             | Q6P3D0           | 3                    | 3              | 19                    | 195    | 21825  | 7.1  | U8 snoRNA-decapping enzyme                                           |
| 3656             | Q505B7-2         | 3                    | 5              | 21.2                  | 146    | 17207  | 4.7  | Isoform 2 of Protein archease                                        |
| 3656             | B2KGA7           | 3                    | 5              | 18.6                  | 167    | 19580  | 4.6  | Zinc finger and BTB domain containing 8 opposite strand              |
| 3656             | Q505B7           | 3                    | 5              | 18.5                  | 168    | 19727  | 4.6  | Protein archease                                                     |
| 3657             | A2RTV1           | 3                    | 3              | 18.1                  | 409    | 45738  | 6.6  | Serpina3h protein                                                    |
| 3657             | Q3U1B7           | 3                    | 3              | 18.1                  | 409    | 45738  | 6.7  | Putative uncharacterized protein                                     |
| 3658             | B1ARU4           | 3                    | 5              | 17.8                  | 7353   | 831666 | 5.4  | Microtubule-actin crosslinking factor 1                              |
| 3658             | UPI0000609071    | 3                    | 5              | 17.8                  | 7355   | 831893 | 5.4  | microtubule-actin cross-linking factor 1 isoform 1                   |
| 3659             | E9Q5X5           | 3                    | 8              | 17.6                  | 204    | 21940  | 4.6  | Uncharacterized protein                                              |
| 3659             | Q07797           | 3                    | 8              | 6.2                   | 577    | 64491  | 5.1  | Galectin-3-binding protein                                           |
| 3660             | Q08692           | 3                    | 5              | 17.4                  | 167    | 19332  | 5.3  | Myeloid batenecin (F1)                                               |
| 3660             | Q61903           | 3                    | 5              | 17.4                  | 167    | 19331  | 5.5  | Myeloid secondary granule protein                                    |
| 3661             | Q3TJB4           | 3                    | 8              | 16.6                  | 368    | 41549  | 5.7  | Putative uncharacterized protein                                     |
| 3661             | Q62419           | 3                    | 8              | 16.6                  | 368    | 41518  | 5.7  | Endophilin-A2                                                        |
| 3661             | Q3U3C4           | 3                    | 8              | 16.6                  | 368    | 41532  | 5.7  | Putative uncharacterized protein                                     |
| 3662             | P26645           | 3                    | 5              | 16.5                  | 309    | 29661  | 4.3  | Myristoylated alanine-rich C-kinase substrate                        |
| 3663             | Q9QZ26           | 3                    | 5              | 16.4                  | 201    | 23995  | 4.8  | Dermatopontin                                                        |
| 3664             | P13412           | 3                    | 4              | 17                    | 182    | 21357  | 8.5  | Troponin I, fast skeletal muscle                                     |
| 3664             | A2A6J8           | 3                    | 4              | 16.3                  | 190    | 22201  | 8.9  | Troponin I, skeletal, fast 2 (Fragment)                              |
| 3665             | P04939           | 3                    | 4              | 16.3                  | 184    | 21465  | 4.8  | Major urinary protein 3                                              |
| 3665             | Q3KQ22           | 3                    | 4              | 16.3                  | 184    | 21417  | 4.8  | MCG15829, isoform CRA_a                                              |
| 3666             | Q9CY62           | 3                    | 3              | 15.8                  | 165    | 19101  | 6    | E3 ubiquitin-protein ligase RNF181                                   |
| 3667             | D3Z380           | 3                    | 3              | 15.6                  | 205    | 23456  | 7    | Uncharacterized protein                                              |
| 3667             | O55060           | 3                    | 3              | 13.3                  | 240    | 27586  | 6.4  | Thiopurine S-methyltransferase                                       |
| 3668             | Q9CQG4           | 3                    | 18             | 15.7                  | 185    | 21087  | 8.1  | Putative uncharacterized protein                                     |
| 3668             | Q5QGU0           | 3                    | 18             | 15.3                  | 189    | 21490  | 8.4  | Receptor expression enhancing protein 5                              |
| 3669             | Q05CZ9           | 3                    | 5              | 15.3                  | 248    | 26951  | 8.1  | Esam1 protein                                                        |
| 3669             | D3Z5Y0           | 3                    | 5              | 15.1                  | 252    | 27217  | 8.5  | Uncharacterized protein                                              |
| 3669             | Q925F2           | 3                    | 5              | 9.6                   | 394    | 41810  | 9.3  | Endothelial cell-selective adhesion molecule                         |
| 3670             | Q3V3M3           | 3                    | 4              | 17                    | 229    | 25801  | 6.8  | Putative uncharacterized protein (Fragment)                          |
| 3670             | P97376           | 3                    | 4              | 15.1                  | 258    | 29127  | 8.9  | Protein FRG1                                                         |
| 3671             | P49935           | 3                    | 9              | 15                    | 333    | 37184  | 8.4  | Cathepsin H                                                          |
| 3671             | Q922Q7           | 3                    | 9              | 15                    | 333    | 37155  | 8.3  | Cathepsin H                                                          |
| 3671             | Q3UCD6           | 3                    | 9              | 15                    | 333    | 37170  | 8.4  | Cathepsin H, isoform CRA_b                                           |
| 3672             | Q543M9           | 3                    | 4              | 14.8                  | 244    | 27392  | 9.2  | MCG14605, isoform CRA_c                                              |
| 3672             | Q99PW4           | 3                    | 4              | 14.8                  | 244    | 27394  | 9.2  | TP53-regulating kinase                                               |
| 3672             | Q5U452           | 3                    | 4              | 14.8                  | 244    | 27436  | 9.1  | MCG14616                                                             |
| 3673             | B1AQD1           | 3                    | 3              | 14.6                  | 198    | 22128  | 7.2  | RAB34, member of RAS oncogene family (Fragment)                      |
| 3673             | B1AQD3           | 3                    | 3              | 11.6                  | 251    | 28314  | 8.1  | RAB34, member of RAS oncogene family                                 |
| 3673             | Q64008           | 3                    | 3              | 11.2                  | 259    | 29101  | 8.3  | Ras-related protein Rab-34                                           |
| 3673             | Q0PD20           | 3                    | 3              | 11.2                  | 259    | 29129  | 8.3  | RAB34, member of RAS oncogene family                                 |
| 3673             | B1AQD4           | 3                    | 3              | 10.9                  | 265    | 29989  | 8.7  | RAB34, member of RAS oncogene family (Fragment)                      |
| 3673             | UPI0001F788F3    | 3                    | 3              | 6.5                   | 444    | 48108  | 9.6  | UPI0001F788F3 UniRef100 entry                                        |
| 3673             | Q3TV85           | 3                    | 3              | 6.5                   | 445    | 48196  | 9.5  | Putative uncharacterized protein (Fragment)                          |
| 3674             | Q9D0A3           | 3                    | 3              | 14.6                  | 226    | 25193  | 5.2  | UPF0552 protein C15orf38 homolog                                     |
| 3675             | E9QLT0           | 3                    | 3              | 13.9                  | 267    | 29395  | 5.6  | Uncharacterized protein                                              |
| 3675             | UPI00015D7B58    | 3                    | 3              | 13.4                  | 277    | 30450  | 6    | putative hydroxypyruvate isomerase                                   |
| 3675             | Q8R1F5           | 3                    | 3              | 13.4                  | 277    | 30449  | 6.4  | Putative hydroxypyruvate isomerase                                   |
| 3676             | UPI0001E6B56D    | 3                    | 14             | 17.6                  | 125    | 13562  | 9.9  | PREDICTED: 60S ribosomal protein L29-like                            |
| 3676             | UPI00015DE8C3    | 3                    | 14             | 13.9                  | 158    | 17446  | 11.4 | UPI00015DE8C3 UniRef100 entry                                        |
| 3676             | D3Y7Z1           | 3                    | 14             | 13.8                  | 160    | 17557  | 11.5 | MCG114459                                                            |
| 3676             | UPI0001553466    | 3                    | 14             | 13.8                  | 160    | 17573  | 11.8 | PREDICTED: 60S ribosomal protein L29-like                            |
| 3676             | UPI0000511B8C    | 3                    | 14             | 13.8                  | 160    | 17617  | 11.8 | PREDICTED: 60S ribosomal protein L29-like                            |
| 3676             | P47915           | 3                    | 14             | 13.8                  | 160    | 17587  | 11.8 | 60S ribosomal protein L29                                            |
| 3676             | D3Z1N9           | 3                    | 14             | 13.8                  | 160    | 17647  | 11.8 | MCG9889                                                              |
| 3676             | D3YU34           | 3                    | 14             | 13.8                  | 160    | 17617  | 11.8 | MCG142394                                                            |
| 3676             | UPI0001E6B983    | 3                    | 14             | 13.1                  | 168    | 18263  | 11.5 | PREDICTED: 60S ribosomal protein L29-like                            |
| 3676             | UPI0001E6B809    | 3                    | 14             | 9.8                   | 224    | 24305  | 10.9 | PREDICTED: 60S ribosomal protein L29-like                            |
| 3676             | UPI0001E6B927    | 3                    | 14             | 8.4                   | 263    | 28520  | 10.8 | PREDICTED: hypothetical protein LOC670211                            |
| 3677             | P14106           | 3                    | 5              | 13.8                  | 253    | 26816  | 8.4  | Complement C1q subcomponent subunit B                                |
| 3677             | Q3US82           | 3                    | 5              | 13.8                  | 253    | 26707  | 8.1  | Putative uncharacterized protein                                     |
| 3677             | Q3U793           | 3                    | 5              | 13.8                  | 253    | 26717  | 8.1  | Complement component 1, q subcomponent, beta polypeptide             |
| 3677             | Q3U6I5           | 3                    | 5              | 13.8                  | 253    | 26751  | 8.1  | Putative uncharacterized protein                                     |
| 3678             | UPI0001E6B85A    | 3                    | 47             | 13.7                  | 730    | 81772  | 9    | PREDICTED: splicing factor U2AF 65 kDa subunit-like                  |
| 3679             | E9Q6X0           | 3                    | 4              | 13                    | 284    | 32265  | 5.3  | Uncharacterized protein                                              |
| 3679             | Q8R001-2         | 3                    | 4              | 11.7                  | 317    | 36070  | 6.3  | Isoform 2 of Microtubule-associated protein RP/EB family member 2    |
| 3679             | Q8R001           | 3                    | 4              | 11.3                  | 326    | 36946  | 5.4  | Microtubule-associated protein RP/EB family member 2                 |
| 3680             | P39039           | 3                    | 3              | 13                    | 239    | 25396  | 7.6  | Mannose-binding protein A                                            |
| 3681             | E9PUZ8           | 3                    | 5              | 12.9                  | 256    | 27845  | 8    | Uncharacterized protein                                              |

Table S1. Proteins identified in the OVCAR-3 tumor supernatant by two or more unique peptides.

| Protein or Group | Accession Number | Unique Peptide Count | Spectrum Count | Sequence Coverage (%) | Length | MolWt  | pI  | Descriptive Name                                                  |
|------------------|------------------|----------------------|----------------|-----------------------|--------|--------|-----|-------------------------------------------------------------------|
| 3681             | Q80SX2           | 3                    | 5              | 7.7                   | 426    | 46647  | 6.4 | C4b-binding protein alpha-chain                                   |
| 3681             | Q91X48           | 3                    | 5              | 7                     | 469    | 51524  | 7.1 | Complement component 4 binding protein                            |
| 3681             | Q3UW06           | 3                    | 5              | 7                     | 469    | 51623  | 7.3 | Putative uncharacterized protein                                  |
| 3681             | P08607           | 3                    | 5              | 7                     | 469    | 51552  | 7.1 | C4b-binding protein                                               |
| 3682             | Q641P0           | 3                    | 15             | 12.7                  | 418    | 47580  | 6   | Actin-related protein 3B                                          |
| 3683             | Q8BN05           | 3                    | 3              | 12.5                  | 408    | 43893  | 8.4 | Putative uncharacterized protein (Fragment)                       |
| 3683             | Q9R118           | 3                    | 3              | 10.6                  | 480    | 51247  | 7.3 | Serine protease HTRA1                                             |
| 3683             | Q9QZK6           | 3                    | 3              | 10.6                  | 480    | 51214  | 7.7 | HtrA serine peptidase 1, isoform CRA_b                            |
| 3683             | Q91WS3           | 3                    | 3              | 10.6                  | 480    | 51213  | 7.8 | HtrA serine peptidase 1                                           |
| 3684             | P70274           | 3                    | 9              | 12.1                  | 380    | 41205  | 7.1 | Selenoprotein P                                                   |
| 3685             | A2A4I0           | 3                    | 5              | 11.7                  | 581    | 64698  | 5.6 | FK506 binding protein 10                                          |
| 3685             | Q61576           | 3                    | 5              | 11.7                  | 581    | 64669  | 5.6 | Peptidyl-prolyl cis-trans isomerase FKBP10                        |
| 3685             | Q3UNJ3           | 3                    | 5              | 11.7                  | 580    | 64640  | 5.6 | Putative uncharacterized protein                                  |
| 3686             | P70460           | 3                    | 3              | 11.5                  | 375    | 39667  | 8.5 | Vasodilator-stimulated phosphoprotein                             |
| 3687             | Q6ZPV5           | 3                    | 8              | 11.5                  | 426    | 47169  | 5.5 | MKIAA1235 protein (Fragment)                                      |
| 3687             | UPI0001F78AEB    | 3                    | 8              | 11.3                  | 433    | 48026  | 5.8 | AT rich interactive domain 1B (Swi1 like)                         |
| 3688             | Q921D0           | 3                    | 3              | 12.3                  | 301    | 33758  | 5.6 | Anxa8 protein                                                     |
| 3688             | O35640           | 3                    | 3              | 11.3                  | 327    | 36843  | 5.8 | Annexin A8                                                        |
| 3688             | Q8K2N9           | 3                    | 3              | 11.3                  | 327    | 36724  | 5.9 | Annexin A8                                                        |
| 3689             | A7LNR1           | 3                    | 5              | 12.4                  | 307    | 33049  | 7.4 | CD93 antigen (Fragment)                                           |
| 3689             | A7LNQ7           | 3                    | 5              | 11                    | 346    | 37378  | 6.6 | CD93 antigen (Fragment)                                           |
| 3689             | A7LNQ8           | 3                    | 5              | 11                    | 346    | 37355  | 6.5 | CD93 antigen (Fragment)                                           |
| 3689             | O89103           | 3                    | 5              | 5.9                   | 644    | 69355  | 5.1 | Complement component C1q receptor                                 |
| 3690             | P28654           | 3                    | 4              | 11                    | 354    | 39809  | 8.7 | Decorin                                                           |
| 3690             | Q3TSV1           | 3                    | 4              | 11                    | 354    | 39775  | 8.7 | Putative uncharacterized protein                                  |
| 3691             | B8JN2            | 3                    | 6              | 10.9                  | 623    | 69685  | 6.9 | Complement component 2 (Within H-2S)                              |
| 3691             | P21180-2         | 3                    | 6              | 9                     | 753    | 83998  | 7.4 | Isoform Short of Complement C2                                    |
| 3691             | P21180           | 3                    | 6              | 8.9                   | 760    | 84726  | 7.5 | Complement C2                                                     |
| 3691             | O70350           | 3                    | 6              | 8.9                   | 760    | 84741  | 7.6 | C2                                                                |
| 3692             | P47199           | 3                    | 4              | 10                    | 331    | 35269  | 8.1 | Quinone oxidoreductase                                            |
| 3692             | Q80XR3           | 3                    | 4              | 10                    | 331    | 35368  | 8.3 | Crystallin, zeta                                                  |
| 3693             | Q9Z247           | 3                    | 3              | 9.6                   | 570    | 62996  | 5.2 | Peptidyl-prolyl cis-trans isomerase FKBP9                         |
| 3694             | O70172           | 3                    | 3              | 8.9                   | 405    | 46152  | 7   | Phosphatidylinositol-5-phosphate 4-kinase type-2 alpha            |
| 3694             | Q9CZS7           | 3                    | 3              | 8.9                   | 405    | 46091  | 7.1 | Putative uncharacterized protein                                  |
| 3695             | E9Q7B0           | 3                    | 5              | 8.6                   | 454    | 51754  | 6.7 | Uncharacterized protein                                           |
| 3695             | Q3TTT2           | 3                    | 5              | 8.6                   | 454    | 51755  | 6.7 | Putative uncharacterized protein                                  |
| 3695             | Q60715-2         | 3                    | 5              | 7.3                   | 534    | 60886  | 5.8 | Isoform 2 of Prolyl 4-hydroxylase subunit alpha-1                 |
| 3695             | Q60715           | 3                    | 5              | 7.3                   | 534    | 60910  | 5.9 | Prolyl 4-hydroxylase subunit alpha-1                              |
| 3695             | Q3TN84           | 3                    | 5              | 7.3                   | 534    | 60924  | 5.9 | Putative uncharacterized protein                                  |
| 3695             | Q3UF16           | 3                    | 5              | 7                     | 561    | 63809  | 5.9 | Putative uncharacterized protein                                  |
| 3696             | O88947           | 3                    | 3              | 8.5                   | 481    | 54018  | 5.7 | Coagulation factor X                                              |
| 3696             | Q4FJS7           | 3                    | 3              | 8.5                   | 481    | 54004  | 5.7 | F10 protein                                                       |
| 3697             | Q3TW96           | 3                    | 4              | 8.5                   | 507    | 56614  | 5.4 | UDP-N-acetylhexosamine pyrophosphorylase-like protein 1           |
| 3697             | Q8BVK3           | 3                    | 4              | 8.4                   | 510    | 56873  | 5.4 | Putative uncharacterized protein (Fragment)                       |
| 3698             | Q9D281           | 3                    | 6              | 8.4                   | 569    | 61013  | 4.6 | Protein Noxp20                                                    |
| 3699             | Q9JN5            | 3                    | 4              | 8.1                   | 457    | 51845  | 8.3 | Carboxypeptidase N catalytic chain                                |
| 3700             | E9QPH2           | 3                    | 7              | 8                     | 650    | 72287  | 4.6 | Uncharacterized protein                                           |
| 3700             | Q3UYK7           | 3                    | 7              | 8                     | 650    | 72300  | 4.6 | Putative uncharacterized protein                                  |
| 3700             | Q3TYD5           | 3                    | 7              | 8                     | 650    | 72342  | 4.6 | Putative uncharacterized protein                                  |
| 3700             | P70663           | 3                    | 7              | 8                     | 650    | 72314  | 4.6 | SPARC-like protein 1                                              |
| 3701             | O55137           | 3                    | 3              | 7.2                   | 419    | 46136  | 6.6 | Acyl-coenzyme A thioesterase 1                                    |
| 3701             | Q99L15           | 3                    | 3              | 7.1                   | 420    | 46248  | 6.6 | Acot1 protein (Fragment)                                          |
| 3701             | Q9QYR9           | 3                    | 3              | 6.6                   | 453    | 49652  | 7.4 | Acyl-coenzyme A thioesterase 2, mitochondrial                     |
| 3701             | Q6P2K2           | 3                    | 3              | 6.6                   | 453    | 49641  | 7.6 | Acyl-CoA thioesterase 2                                           |
| 3701             | Q3T9C9           | 3                    | 3              | 6.6                   | 453    | 49657  | 7.4 | MCG4931                                                           |
| 3702             | Q9D2L5           | 3                    | 6              | 7.1                   | 764    | 86963  | 6.7 | Inactive carboxypeptidase-like protein X2                         |
| 3703             | A3KMP2-2         | 3                    | 4              | 11.5                  | 279    | 31589  | 6.3 | Isoform 2 of Tetratricopeptide repeat protein 38                  |
| 3703             | A3KMP2           | 3                    | 4              | 6.9                   | 465    | 52224  | 6.3 | Tetratricopeptide repeat protein 38                               |
| 3704             | P00687           | 3                    | 3              | 6.7                   | 511    | 57624  | 7   | Alpha-amylase 1                                                   |
| 3704             | Q921Y7           | 3                    | 3              | 6.7                   | 511    | 57644  | 7   | Amy1 protein                                                      |
| 3705             | Q8R480           | 3                    | 9              | 5.8                   | 656    | 74776  | 5.6 | Nuclear pore complex protein Nup85                                |
| 3706             | P08071           | 3                    | 3              | 5.7                   | 707    | 77866  | 8.6 | Lactotransferrin                                                  |
| 3706             | Q8CBA0           | 3                    | 3              | 5.7                   | 707    | 77838  | 8.5 | Putative uncharacterized protein                                  |
| 3706             | Q3UBV2           | 3                    | 3              | 5.7                   | 707    | 77886  | 8.6 | Putative uncharacterized protein                                  |
| 3706             | Q3TP24           | 3                    | 3              | 5.7                   | 707    | 77872  | 8.5 | Putative uncharacterized protein                                  |
| 3707             | Q9ET02           | 3                    | 4              | 6.1                   | 770    | 86065  | 6.5 | Ube1l (Fragment)                                                  |
| 3707             | E9Q2Z8           | 3                    | 4              | 5.3                   | 879    | 97331  | 6.1 | Uncharacterized protein                                           |
| 3707             | Q8BTN4           | 3                    | 4              | 5.2                   | 905    | 100434 | 6.1 | Putative uncharacterized protein                                  |
| 3707             | Q9DBK7           | 3                    | 4              | 4.8                   | 977    | 108679 | 6   | MCG18845, isoform CRA_d                                           |
| 3708             | Q3V1T4-3         | 3                    | 3              | 7                     | 560    | 64102  | 4.9 | Isoform 3 of Prolyl 3-hydroxylase 1                               |
| 3708             | Q3V1T4           | 3                    | 3              | 5.3                   | 739    | 83651  | 5.1 | Prolyl 3-hydroxylase 1                                            |
| 3708             | A2A7Q5           | 3                    | 3              | 5.2                   | 748    | 84479  | 5.2 | Lepreca 1                                                         |
| 3708             | A6PW84           | 3                    | 3              | 5.2                   | 746    | 84473  | 5.2 | Lepreca 1                                                         |
| 3709             | Q3UW53           | 3                    | 3              | 5.2                   | 926    | 102649 | 4.8 | Protein Niban                                                     |
| 3710             | E9PWS1           | 3                    | 4              | 4.3                   | 818    | 92908  | 8.5 | Uncharacterized protein                                           |
| 3710             | Q8BUT2           | 3                    | 4              | 4.3                   | 819    | 92863  | 8.2 | Putative uncharacterized protein                                  |
| 3710             | Q8BZ98-2         | 3                    | 4              | 4.1                   | 859    | 96804  | 8.2 | Isoform 2 of Dynamin-3                                            |
| 3710             | Q8BZ98           | 3                    | 4              | 4.1                   | 863    | 97190  | 8.4 | Dynamin-3                                                         |
| 3710             | E9QLL2           | 3                    | 4              | 4.1                   | 863    | 97274  | 8.6 | Uncharacterized protein                                           |
| 3711             | Q3TAZ7           | 3                    | 4              | 6.9                   | 551    | 61648  | 6.4 | Putative uncharacterized protein                                  |
| 3711             | Q3U4N8           | 3                    | 4              | 4.1                   | 922    | 103724 | 6.7 | Tyrosine-protein kinase receptor (Fragment)                       |
| 3711             | Q3U1X4           | 3                    | 4              | 4                     | 945    | 105535 | 6.6 | Tyrosine-protein kinase receptor (Fragment)                       |
| 3711             | P09581           | 3                    | 4              | 3.9                   | 977    | 108179 | 6.2 | Macrophage colony-stimulating factor 1 receptor                   |
| 3711             | Q6NXV8           | 3                    | 4              | 3.9                   | 977    | 109252 | 6.2 | Tyrosine-protein kinase receptor                                  |
| 3711             | Q3UKC6           | 3                    | 4              | 3.9                   | 977    | 109192 | 6.2 | Tyrosine-protein kinase receptor                                  |
| 3711             | Q3U3W0           | 3                    | 4              | 3.9                   | 977    | 109140 | 6.1 | Tyrosine-protein kinase receptor                                  |
| 3711             | Q3U210           | 3                    | 4              | 3.9                   | 977    | 109061 | 6.3 | Tyrosine-protein kinase receptor                                  |
| 3711             | Q3U1Y3           | 3                    | 4              | 3.9                   | 977    | 109110 | 6.1 | Tyrosine-protein kinase receptor                                  |
| 3712             | D3YXK2           | 3                    | 11             | 3.8                   | 937    | 105104 | 5.4 | MCG127409                                                         |
| 3713             | Q5JC28           | 3                    | 3              | 4.3                   | 793    | 86678  | 4.7 | Epidermal growth factor receptor pathway substrate 15 isoform B   |
| 3713             | P42567           | 3                    | 3              | 3.8                   | 897    | 98471  | 4.6 | Epidermal growth factor receptor substrate 15                     |
| 3714             | E9QMR4           | 3                    | 3              | 3                     | 1578   | 173945 | 7.2 | Uncharacterized protein                                           |
| 3714             | Q6A065           | 3                    | 3              | 3                     | 1588   | 175049 | 7.2 | Centrosomal protein of 170 kDa                                    |
| 3715             | Q62470-2         | 3                    | 3              | 2.6                   | 1057   | 117357 | 6.8 | Isoform Alpha-3B of Integrin alpha-3                              |
| 3715             | Q62470           | 3                    | 3              | 2.6                   | 1053   | 116745 | 6.6 | Integrin alpha-3                                                  |
| 3715             | Q5SWA8           | 3                    | 3              | 2.5                   | 1068   | 118883 | 6.8 | Integrin alpha 3                                                  |
| 3716             | Q8CIH5           | 3                    | 3              | 2.5                   | 1265   | 147592 | 6.8 | 1-phosphatidylinositol-4,5-bisphosphate phosphodiesterase gamma-2 |
| 3717             | B9EKJ7           | 3                    | 5              | 2.2                   | 1720   | 181825 | 4.9 | Tankyrase 1 binding protein 1                                     |
| 3717             | P58871           | 3                    | 5              | 2.2                   | 1720   | 181824 | 4.9 | 182 kDa tankyrase-1-binding protein                               |
| 3718             | E9QP10           | 3                    | 3              | 2.1                   | 2038   | 219891 | 6.8 | Uncharacterized protein                                           |
| 3718             | Q5PRF0           | 3                    | 3              | 2.1                   | 2038   | 219819 | 6.8 | HEAT repeat-containing protein 5A                                 |
| 3719             | Q8C3Y4           | 3                    | 3              | 1.9                   | 2207   | 250356 | 6   | Kinetochores-associated protein 1                                 |

Table S1. Proteins identified in the OVCAR-3 tumor supernatant by two or more unique peptides.

| Protein or Group | Accession Number | Unique Peptide Count | Spectrum Count | Sequence Coverage (%) | Length | MolWt   | pI   | Descriptive Name                                                                                                |
|------------------|------------------|----------------------|----------------|-----------------------|--------|---------|------|-----------------------------------------------------------------------------------------------------------------|
| 3720             | D3YXG0           | 3                    | 3              | 0.6                   | 5634   | 611568  | 6.6  | Uncharacterized protein                                                                                         |
| 3720             | D3Z2Q7           | 3                    | 3              | 0.6                   | 5517   | 598265  | 6.6  | Uncharacterized protein                                                                                         |
| 3721             | E9PUM2           | 3                    | 5              | 0.5                   | 8799   | 1010026 | 5.6  | Uncharacterized protein                                                                                         |
| 3721             | Q6ZWR6-4         | 3                    | 5              | 0.5                   | 8797   | 1009691 | 5.6  | Isoform 4 of Nesprin-1                                                                                          |
| 3721             | Q6ZWR6           | 3                    | 5              | 0.5                   | 8799   | 1009946 | 5.6  | Nesprin-1                                                                                                       |
| 3722             | P24666-2         | 3                    | 21             | 69                    | 158    | 17977   | 6.9  | Isoform 2 of Low molecular weight phosphotyrosine protein phosphatase                                           |
| 3723             | P30047           | 3                    | 8              | 69                    | 84     | 9698    | 6.5  | GTP cyclohydrolase 1 feedback regulatory protein                                                                |
| 3723             | Q53F59           | 3                    | 8              | 69                    | 84     | 9679    | 6.3  | GTP cyclohydrolase 1 feedback regulatory protein variant (Fragment)                                             |
| 3724             | E5RI56           | 3                    | 92             | 63.7                  | 91     | 10271   | 4.4  | Uncharacterized protein                                                                                         |
| 3725             | Q13542           | 3                    | 5              | 61.7                  | 120    | 12939   | 6.7  | Eukaryotic translation initiation factor 4E-binding protein 2                                                   |
| 3725             | Q6FG68           | 3                    | 5              | 61.7                  | 120    | 12969   | 6.7  | EIF4EBP2 protein (Fragment)                                                                                     |
| 3726             | Q75506           | 3                    | 9              | 59.2                  | 76     | 8544    | 4.4  | Heat shock factor-binding protein 1                                                                             |
| 3727             | Q13541           | 3                    | 5              | 58.5                  | 118    | 12580   | 5.5  | Eukaryotic translation initiation factor 4E-binding protein 1                                                   |
| 3728             | Q9UBI6           | 3                    | 7              | 56.9                  | 72     | 8006    | 9    | Guanine nucleotide-binding protein G(I)/G(S)/G(O) subunit gamma-12                                              |
| 3729             | Q9H3K6           | 3                    | 55             | 51.2                  | 86     | 10117   | 6.5  | BoIA-like protein 2                                                                                             |
| 3730             | Q9P086           | 3                    | 7              | 49.6                  | 117    | 13129   | 5.9  | Mediator of RNA polymerase II transcription subunit 11                                                          |
| 3731             | Q9P1F3           | 3                    | 10             | 46.9                  | 81     | 9056    | 6.3  | Costars family protein C6orf115                                                                                 |
| 3732             | A8MUW3           | 3                    | 6              | 45.3                  | 117    | 12225   | 4.9  | Uncharacterized protein                                                                                         |
| 3732             | Q9NR33           | 3                    | 6              | 45.3                  | 117    | 12209   | 4.9  | DNA polymerase epsilon subunit 4                                                                                |
| 3733             | Q15004           | 3                    | 6              | 45                    | 111    | 11986   | 9.8  | PCNA-associated factor                                                                                          |
| 3734             | P01040           | 3                    | 4              | 42.9                  | 98     | 11006   | 5.5  | Cystatin-A                                                                                                      |
| 3735             | Q9NS69           | 3                    | 7              | 42.3                  | 142    | 15522   | 4.3  | Mitochondrial import receptor subunit TOM22 log                                                                 |
| 3736             | Q5HYD9           | 3                    | 4              | 51.4                  | 107    | 11873   | 4.8  | Putative uncharacterized protein DKFZp686M0619 (Fragment)                                                       |
| 3736             | D6RFH4           | 3                    | 4              | 42                    | 131    | 14846   | 6.2  | Uncharacterized protein                                                                                         |
| 3736             | Q43169           | 3                    | 4              | 37.7                  | 146    | 16332   | 5    | Cytochrome b5 type B                                                                                            |
| 3737             | C9JHF5           | 3                    | 3              | 40.6                  | 138    | 15627   | 5.2  | Uncharacterized protein                                                                                         |
| 3737             | Q9GZY8-4         | 3                    | 3              | 25.7                  | 218    | 25067   | 5.6  | Isoform 4 of Mitochondrial fission factor                                                                       |
| 3737             | Q9GZY8-5         | 3                    | 3              | 23.5                  | 238    | 27105   | 6.6  | Isoform 5 of Mitochondrial fission factor                                                                       |
| 3737             | Q9GZY8-3         | 3                    | 3              | 23                    | 243    | 27964   | 7.3  | Isoform 3 of Mitochondrial fission factor                                                                       |
| 3737             | Q9GZY8-2         | 3                    | 3              | 19.2                  | 291    | 32973   | 7.5  | Isoform 2 of Mitochondrial fission factor                                                                       |
| 3737             | Q9GZY8           | 3                    | 3              | 16.4                  | 342    | 38465   | 9    | Mitochondrial fission factor                                                                                    |
| 3738             | O43678           | 3                    | 7              | 40.4                  | 99     | 10922   | 9.6  | NADH dehydrogenase [ubiquinone] 1 alpha subcomplex subunit 2                                                    |
| 3739             | P51808           | 3                    | 7              | 52.6                  | 116    | 13062   | 5.7  | Dynein light chain Tctex-type 3                                                                                 |
| 3739             | A6NGJ0           | 3                    | 7              | 40.1                  | 152    | 16979   | 5.9  | Uncharacterized protein                                                                                         |
| 3740             | C9JYQ9           | 3                    | 4              | 39.7                  | 121    | 14478   | 9.4  | Uncharacterized protein                                                                                         |
| 3740             | Q6P5R6           | 3                    | 4              | 39.3                  | 122    | 14606   | 9.4  | 60S ribosomal protein L22-like 1                                                                                |
| 3740             | UPI0000EE2292    | 3                    | 4              | 33.8                  | 142    | 16900   | 9.2  | UPI0000EE2292 UniRef100 entry                                                                                   |
| 3741             | Q6TXQ4           | 3                    | 5              | 39.3                  | 107    | 12104   | 10.6 | Histone H3 (Fragment)                                                                                           |
| 3742             | Q14657           | 3                    | 30             | 37.8                  | 143    | 14804   | 8.6  | L antigen family member 3                                                                                       |
| 3743             | Q92930           | 3                    | 9              | 37.7                  | 207    | 23584   | 9.1  | Ras-related protein Rab-8B                                                                                      |
| 3744             | Q9H496           | 3                    | 5              | 36.6                  | 131    | 15347   | 7.3  | IFRG15 protein                                                                                                  |
| 3745             | B3KQAO           | 3                    | 14             | 36.2                  | 127    | 14550   | 4.6  | cDNA FLJ90015 fis, clone HEMBA100634, highly similar to sapiens Mof4 family associated protein 1 (MRFAP1), mRNA |
| 3745             | Q9Y605           | 3                    | 14             | 36.2                  | 127    | 14650   | 4.7  | MORF4 family-associated protein 1                                                                               |
| 3746             | Q8HZE3           | 3                    | 10             | 43.8                  | 96     | 11265   | 6.5  | Beta-2 microglobulin (Fragment)                                                                                 |
| 3746             | P61769           | 3                    | 10             | 35.3                  | 119    | 13715   | 6.5  | Beta-2-microglobulin                                                                                            |
| 3746             | B4E0X1           | 3                    | 10             | 34.4                  | 122    | 13946   | 7.5  | cDNA FLJ57067, highly similar to Beta-2-microglobulin                                                           |
| 3747             | Q9E639           | 3                    | 8              | 33.6                  | 390    | 42142   | 9.9  | RNA-binding motif protein X-linked-like 1 (Kynurenine aminotransferase III) (Protein RBM1)                      |
| 3748             | Q8WW01           | 3                    | 9              | 33.3                  | 171    | 18641   | 4.6  | tRNA-splicing endonuclease subunit Sen15                                                                        |
| 3749             | Q15828           | 3                    | 6              | 32.9                  | 149    | 16511   | 8.1  | Cystatin-M                                                                                                      |
| 3749             | Q6IBD2           | 3                    | 6              | 32.9                  | 149    | 16493   | 8.1  | CST6 protein                                                                                                    |
| 3750             | Q53GA4           | 3                    | 3              | 32.9                  | 152    | 17092   | 9.2  | Pleckstrin logy-like domain family A member 2                                                                   |
| 3751             | C9JLW8           | 3                    | 4              | 32                    | 97     | 10920   | 9.4  | Protein FAM195B                                                                                                 |
| 3752             | Q9Y6H1           | 3                    | 8              | 31.1                  | 151    | 15513   | 9.2  | Coiled-coil-helix-coiled-coil-helix domain-containing protein 2, mitochondrial                                  |
| 3753             | Q4TZM4           | 3                    | 79             | 31.7                  | 101    | 11022   | 6.5  | Hemoglobin beta chain (Fragment)                                                                                |
| 3753             | B3VL05           | 3                    | 79             | 30.5                  | 105    | 11488   | 6.7  | Beta globin (Fragment)                                                                                          |
| 3753             | Q8IZI0           | 3                    | 79             | 30.5                  | 105    | 11505   | 5.7  | Hemoglobin beta chain variant Hb-L Toulouse (Fragment)                                                          |
| 3753             | Q8IUL9           | 3                    | 79             | 30.5                  | 105    | 11548   | 6.1  | Hemoglobin beta chain variant Hb.Sinai-Bel Air (Fragment)                                                       |
| 3753             | Q6V0K9           | 3                    | 79             | 30.5                  | 105    | 11474   | 6.7  | Mutant hemoglobin beta chain (Fragment)                                                                         |
| 3753             | Q6J1Z7           | 3                    | 79             | 30.5                  | 105    | 11446   | 6.7  | Hemoglobin beta (Fragment)                                                                                      |
| 3753             | Q670S4           | 3                    | 79             | 30.5                  | 105    | 11459   | 6.7  | Hemoglobin Lepore-Baltimore (Fragment)                                                                          |
| 3753             | Q52MT0           | 3                    | 79             | 30.5                  | 105    | 11476   | 6.4  | Beta globin (Fragment)                                                                                          |
| 3753             | Q3LR79           | 3                    | 79             | 30.5                  | 105    | 11482   | 5.8  | Hemoglobin beta (Fragment)                                                                                      |
| 3753             | E9NGZ5           | 3                    | 79             | 30.5                  | 105    | 11494   | 6.4  | Hemoglobin beta globin chain (Fragment)                                                                         |
| 3753             | Q9BWW6           | 3                    | 79             | 28.8                  | 111    | 12234   | 6.1  | Mutant beta globin                                                                                              |
| 3753             | Q9UK54           | 3                    | 79             | 25                    | 128    | 13964   | 7    | Hemoglobin beta subunit variant (Fragment)                                                                      |
| 3753             | B3VL86           | 3                    | 79             | 23                    | 139    | 14956   | 6.8  | Mutant beta-globin                                                                                              |
| 3753             | P68871           | 3                    | 79             | 21.8                  | 147    | 15998   | 7.3  | Hemoglobin subunit beta                                                                                         |
| 3753             | C8C504           | 3                    | 79             | 21.8                  | 147    | 15997   | 8.1  | Beta-globin                                                                                                     |
| 3753             | Q14473           | 3                    | 79             | 18.3                  | 175    | 18931   | 6.8  | Beta-globin gene from a thalassemia patient,                                                                    |
| 3754             | Q9BTL3           | 3                    | 7              | 30.5                  | 118    | 14381   | 8.9  | Protein FAM103A1                                                                                                |
| 3755             | C0LAA5           | 3                    | 3              | 29.8                  | 181    | 21253   | 5.7  | MHC class I antigen (Fragment)                                                                                  |
| 3756             | P52657           | 3                    | 6              | 29.4                  | 109    | 12457   | 6.8  | Transcription initiation factor IIA subunit 2                                                                   |
| 3757             | Q92934           | 3                    | 5              | 29.2                  | 168    | 18392   | 7.1  | Bcl2 antagonist of cell death                                                                                   |
| 3758             | B4DEY0           | 3                    | 8              | 28.6                  | 192    | 21809   | 5.1  | cDNA FLJ60450, highly similar to OTU domain-containing protein 6B                                               |
| 3758             | Q8N6M0           | 3                    | 8              | 18.8                  | 293    | 33813   | 6    | OTU domain-containing protein 6B                                                                                |
| 3758             | UPI0000E5AF0F    | 3                    | 8              | 17                    | 323    | 37326   | 6.7  | OTU domain-containing protein 6B                                                                                |
| 3759             | UPI000020D624    | 3                    | 4              | 34.2                  | 117    | 12366   | 8.5  | acyl-coenzyme A thioesterase 13 isoform 2                                                                       |
| 3759             | Q9NPJ3           | 3                    | 4              | 28.6                  | 140    | 14960   | 9.1  | Acyl-coenzyme A thioesterase 13                                                                                 |
| 3760             | UPI00006C1B87    | 3                    | 5              | 28.3                  | 127    | 14961   | 10.3 | PREDICTED: protein LLP log                                                                                      |
| 3760             | UPI00006C1B33    | 3                    | 5              | 28.3                  | 127    | 14986   | 10.4 | PREDICTED: protein LLP log                                                                                      |
| 3760             | Q9BRT6           | 3                    | 5              | 27.9                  | 129    | 15225   | 10.4 | Protein LLP log                                                                                                 |
| 3761             | A6ZKI3           | 3                    | 4              | 27.4                  | 113    | 13171   | 5.1  | Protein FAM127A                                                                                                 |
| 3761             | Q9BWD3           | 3                    | 4              | 27.4                  | 113    | 13188   | 5.1  | Protein FAM127B                                                                                                 |
| 3762             | Q13158           | 3                    | 12             | 27.4                  | 208    | 23279   | 5.7  | Protein FADD                                                                                                    |
| 3763             | B4E2R3           | 3                    | 3              | 27.3                  | 154    | 16760   | 5.4  | cDNA FLJ58875, highly similar to sapiens G protein beta subunit-like (GBL), mRNA                                |
| 3763             | Q9BVC4-4         | 3                    | 3              | 19.4                  | 217    | 23850   | 6.2  | Isoform 3 of Target of rapamycin complex subunit LST8                                                           |
| 3763             | Q9BVC4           | 3                    | 3              | 12.9                  | 326    | 35876   | 5.9  | Target of rapamycin complex subunit LST8                                                                        |
| 3764             | Q8N1A6           | 3                    | 3              | 26.6                  | 199    | 23468   | 5.4  | UPF0462 protein C4orf33                                                                                         |
| 3765             | B4E3K9           | 3                    | 7              | 26.5                  | 162    | 18262   | 8.4  | Superoxide dismutase                                                                                            |
| 3765             | Q8HXP7           | 3                    | 7              | 21.7                  | 198    | 22204   | 7.3  | Superoxide dismutase [Mn], mitochondrial                                                                        |
| 3765             | Q7Z7M4           | 3                    | 7              | 20.2                  | 213    | 23673   | 7.3  | Superoxide dismutase (Fragment)                                                                                 |
| 3765             | P04179           | 3                    | 7              | 19.4                  | 222    | 24722   | 8.3  | Superoxide dismutase [Mn], mitochondrial                                                                        |
| 3766             | P69905           | 3                    | 136            | 25.4                  | 142    | 15258   | 8.7  | Hemoglobin subunit alpha                                                                                        |
| 3767             | B4DQE7           | 3                    | 4              | 24.2                  | 182    | 20141   | 6.9  | cDNA FLJ58211, highly similar to Histone deacetylase 8                                                          |
| 3767             | Q9BY41           | 3                    | 4              | 11.7                  | 377    | 41758   | 5.6  | Histone deacetylase 8                                                                                           |



Table S1. Proteins identified in the OVCAR-3 tumor supernatant by two or more unique peptides.

| Protein or Protein Group | Accession Number | Unique Peptide Count | Spectrum Count | Sequence Coverage (%) | Length | MolWt  | pI   | Descriptive Name                                                                                                                                                                                    |
|--------------------------|------------------|----------------------|----------------|-----------------------|--------|--------|------|-----------------------------------------------------------------------------------------------------------------------------------------------------------------------------------------------------|
| 3768                     | Q14353           | 3                    | 6              | 24.2                  | 236    | 26318  | 6.1  | Guanidinoacetate N-methyltransferase                                                                                                                                                                |
| 3769                     | Q969H6           | 3                    | 6              | 23.9                  | 163    | 18820  | 7.2  | Ribonuclease P/MRP protein subunit POP5                                                                                                                                                             |
| 3770                     | Q6ZSJ8           | 3                    | 11             | 23.6                  | 110    | 11471  | 6.7  | Uncharacterized protein C1orf122                                                                                                                                                                    |
| 3771                     | Q96EY4           | 3                    | 5              | 23.2                  | 203    | 23864  | 9.3  | UPF0534 protein C4orf43                                                                                                                                                                             |
| 3771                     | UPI0001D3B969    | 3                    | 5              | 19.4                  | 242    | 27685  | 9.6  | UPI0001D3B969 UniRef100 entry                                                                                                                                                                       |
| 3772                     | Q96E14           | 3                    | 5              | 23.1                  | 147    | 15865  | 7.9  | RecQ-mediated genome instability protein 2                                                                                                                                                          |
| 3773                     | Q9NWC9           | 3                    | 3              | 22.9                  | 140    | 16009  | 4.9  | Uncharacterized protein C14orf119                                                                                                                                                                   |
| 3774                     | Q15041           | 3                    | 10             | 22.7                  | 203    | 23363  | 9.3  | ADP-ribosylation factor-like protein 6-interacting protein 1                                                                                                                                        |
| 3775                     | Q96CP2           | 3                    | 3              | 22.1                  | 140    | 14564  | 8.5  | FLYWCH family member 2                                                                                                                                                                              |
| 3776                     | A6NNI4           | 3                    | 9              | 22                    | 159    | 17764  | 6.3  | Uncharacterized protein                                                                                                                                                                             |
| 3776                     | P21926           | 3                    | 9              | 15.4                  | 228    | 25416  | 7.1  | CD9 antigen                                                                                                                                                                                         |
| 3777                     | Q9HOF7           | 3                    | 3              | 22                    | 186    | 21097  | 8.5  | ADP-ribosylation factor-like protein 6                                                                                                                                                              |
| 3778                     | QH0D47           | 3                    | 3              | 22                    | 186    | 20448  | 4.9  | Ran guanine nucleotide release factor<br>cDNA FLJ38643 fis, clone HHDPC2005513, highly similar to ARF-related protein 1                                                                             |
| 3779                     | B3KTR4           | 3                    | 3              | 21.9                  | 201    | 22584  | 7.6  | ADP-ribosylation factor-related protein 1                                                                                                                                                           |
| 3779                     | Q13795           | 3                    | 3              | 21.9                  | 201    | 22614  | 7.6  | ADP-ribosylation factor-related protein 1                                                                                                                                                           |
| 3780                     | B1AHF3           | 3                    | 4              | 21.8                  | 147    | 16696  | 9.7  | Cytochrome b5 reductase 3 (Fragment)                                                                                                                                                                |
| 3780                     | P00387           | 3                    | 4              | 10.6                  | 301    | 34235  | 7.6  | NADH-cytochrome b5 reductase 3<br>cDNA FLJ56301, highly similar to NADH-cytochrome b5 reductase (EC 1.6.2.2)                                                                                        |
| 3780                     | B7Z7L3           | 3                    | 4              | 9.6                   | 334    | 38226  | 6.9  | Isoform SNAP-23b of Synaptosomal-associated protein 23                                                                                                                                              |
| 3781                     | O00161-2         | 3                    | 4              | 29.1                  | 158    | 17789  | 4.7  | Synaptosomal-associated protein 23                                                                                                                                                                  |
| 3781                     | O00161           | 3                    | 4              | 21.8                  | 211    | 23354  | 5    | U1 small nuclear ribonucleoprotein C                                                                                                                                                                |
| 3782                     | Q5TAL3           | 3                    | 13             | 21.7                  | 180    | 19687  | 9.6  | Isoform 4 of Prostamide/prostaglandin F synthase                                                                                                                                                    |
| 3783                     | Q8TBF2-4         | 3                    | 4              | 26.5                  | 162    | 17621  | 6.2  | Isoform 2 of Prostamide/prostaglandin F synthase                                                                                                                                                    |
| 3783                     | Q8TBF2-2         | 3                    | 4              | 23.5                  | 183    | 19465  | 8.5  | Isoform 5 of Prostamide/prostaglandin F synthase                                                                                                                                                    |
| 3783                     | Q8TBF2-5         | 3                    | 4              | 22.5                  | 191    | 20548  | 5.9  | Isoform 7 of Prostamide/prostaglandin F synthase                                                                                                                                                    |
| 3783                     | Q8TBF2           | 3                    | 4              | 21.7                  | 198    | 21223  | 6.7  | Isoform 3 of Prostamide/prostaglandin F synthase                                                                                                                                                    |
| 3783                     | Q8TBF2-7         | 3                    | 4              | 21.4                  | 201    | 21597  | 8.6  | Isoform 6 of Prostamide/prostaglandin F synthase                                                                                                                                                    |
| 3783                     | Q8TBF2-3         | 3                    | 4              | 19.9                  | 216    | 23355  | 7    | Isoform 1 of Prostamide/prostaglandin F synthase                                                                                                                                                    |
| 3783                     | Q8TBF2-6         | 3                    | 4              | 19.2                  | 224    | 24122  | 7.2  | Isoform 4 of Prostamide/prostaglandin F synthase                                                                                                                                                    |
| 3783                     | UPI0001E306A4    | 3                    | 4              | 18.9                  | 228    | 24278  | 6.7  | hypothetical protein LOC127281 isoform b                                                                                                                                                            |
| 3784                     | Q9NRW3           | 3                    | 5              | 21.6                  | 190    | 22826  | 7.6  | Probable DNA dC- dU-editing enzyme APOBEC-3C                                                                                                                                                        |
| 3785                     | Q53HV7           | 3                    | 4              | 21.5                  | 270    | 29862  | 6.6  | Single-strand selective monofunctional uracil DNA glycosylase<br>Putative mediator of RNA polymerase II transcription subunit 30 short                                                              |
| 3786                     | C6GKU9           | 3                    | 3              | 21                    | 143    | 16279  | 9.2  | Mediator of RNA polymerase II transcription subunit 30                                                                                                                                              |
| 3786                     | Q96HR3           | 3                    | 3              | 16.9                  | 178    | 20277  | 8.3  | Tumor protein p63-regulated gene 1-like protein                                                                                                                                                     |
| 3787                     | Q5T0D9           | 3                    | 5              | 20.6                  | 272    | 30212  | 7.3  | CDK-activating kinase assembly factor MAT1                                                                                                                                                          |
| 3788                     | P51948           | 3                    | 5              | 20.4                  | 309    | 35823  | 6.1  | Tubulin polymerization-promoting protein family member 3                                                                                                                                            |
| 3789                     | Q9BW30           | 3                    | 4              | 19.9                  | 176    | 18985  | 9.1  | Protein phosphatase 1 regulatory subunit 11                                                                                                                                                         |
| 3790                     | O60927           | 3                    | 5              | 19.8                  | 126    | 13952  | 7    | GM2 activator protein                                                                                                                                                                               |
| 3791                     | Q6LBL5           | 3                    | 3              | 20.1                  | 189    | 20363  | 5.3  | cDNA, FLJ92855, highly similar to sapiens GM2 ganglioside activator protein (GM2A), mRNA                                                                                                            |
| 3791                     | B2R699           | 3                    | 3              | 19.7                  | 193    | 20889  | 5.6  | Ganglioside GM2 activator                                                                                                                                                                           |
| 3791                     | P17900           | 3                    | 3              | 19.7                  | 193    | 20838  | 5.3  | cDNA, FLJ95242, highly similar to sapiens L-3-hydroxyacyl-Coenzyme A dehydrogenase, short chain (HADHSC), mRNA                                                                                      |
| 3792                     | B2RB06           | 3                    | 5              | 19.7                  | 314    | 34261  | 8.9  | Hydroxyacyl-coenzyme A dehydrogenase, mitochondrial                                                                                                                                                 |
| 3792                     | Q16836           | 3                    | 5              | 19.7                  | 314    | 34294  | 8.9  | Uncharacterized protein                                                                                                                                                                             |
| 3792                     | E9PF18           | 3                    | 5              | 19.5                  | 318    | 35237  | 7.2  | cDNA FLJ38699 fis, clone KIDNE2002168, highly similar to Short chain 3-hydroxyacyl-CoA dehydrogenase, mitochondrial (EC 1.1.1.35)                                                                   |
| 3792                     | B3KTT6           | 3                    | 5              | 19.5                  | 318    | 35221  | 7.2  | hydroxyacyl-coenzyme A dehydrogenase, mitochondrial isoform 1 precursor                                                                                                                             |
| 3792                     | UPI0001D34148    | 3                    | 5              | 18.7                  | 331    | 36035  | 8.5  | Hydroxyacyl-coenzyme A dehydrogenase, mitochondrial precursor (EC 1.1.1.35) (Short chain 3-hydroxyacyl-CoA dehydrogenase) (HCDH) (Medium and short chain L-3-hydroxyacyl-coenzyme A dehydrogenase). |
| 3792                     | UPI000013D5C7    | 3                    | 5              | 15.9                  | 390    | 42123  | 9.3  | Isoform 2 of Hydroxyacyl-coenzyme A dehydrogenase, mitochondrial                                                                                                                                    |
| 3792                     | Q16836-2         | 3                    | 5              | 15.9                  | 390    | 42140  | 9.3  | Metalloproteinase inhibitor 2                                                                                                                                                                       |
| 3793                     | P16035           | 3                    | 9              | 19.5                  | 220    | 24399  | 7.5  | Importin subunit alpha-3                                                                                                                                                                            |
| 3794                     | O00055           | 3                    | 5              | 19.4                  | 521    | 57811  | 4.9  | Karyopherin alpha 3 (Importin alpha 4)                                                                                                                                                              |
| 3794                     | Q81YQ9           | 3                    | 5              | 19.4                  | 521    | 57901  | 4.9  | Tumor suppressor candidate gene 1 protein                                                                                                                                                           |
| 3795                     | Q2TAM9           | 3                    | 3              | 19.3                  | 212    | 23390  | 11.2 | Claudin-3                                                                                                                                                                                           |
| 3796                     | O15551           | 3                    | 14             | 19.1                  | 220    | 23319  | 8.1  | UPI0001AE691F UniRef100 entry                                                                                                                                                                       |
| 3797                     | UPI0001AE691F    | 3                    | 7              | 18.9                  | 355    | 39542  | 7.4  | Cytoplasmic protein Ndr1                                                                                                                                                                            |
| 3797                     | Q8TDR6           | 3                    | 7              | 18.8                  | 356    | 39531  | 7    | Isoform 2 of Protein NDRG2                                                                                                                                                                          |
| 3797                     | Q9UN36-2         | 3                    | 7              | 18.8                  | 357    | 39289  | 5.4  | Isoform 3 of Protein NDRG2                                                                                                                                                                          |
| 3797                     | Q9UN36-3         | 3                    | 7              | 18.6                  | 360    | 39679  | 5.4  | Protein NDRG2                                                                                                                                                                                       |
| 3797                     | Q9UN36           | 3                    | 7              | 18.1                  | 371    | 40798  | 5.2  | Uncharacterized protein                                                                                                                                                                             |
| 3798                     | A6NG64           | 3                    | 3              | 18.6                  | 226    | 25689  | 6.5  | Protein archease                                                                                                                                                                                    |
| 3799                     | Q8IWT0           | 3                    | 5              | 18.6                  | 167    | 19491  | 4.5  | Receptor expression-enhancing protein 6                                                                                                                                                             |
| 3800                     | Q96HR9           | 3                    | 6              | 18.5                  | 184    | 20733  | 8.6  | Isoform 2 of Zinc finger protein 24                                                                                                                                                                 |
| 3801                     | P17028-2         | 3                    | 3              | 34.7                  | 193    | 22382  | 4.6  | Zinc finger protein 24                                                                                                                                                                              |
| 3801                     | P17028           | 3                    | 3              | 18.2                  | 368    | 42155  | 6.2  | Protein N-terminal glutamine amidohydrolase                                                                                                                                                         |
| 3802                     | Q96HA8           | 3                    | 5              | 18                    | 205    | 23680  | 5.8  | Target of myb1 (Chicken), isoform CRA_a                                                                                                                                                             |
| 3803                     | B3KUU1           | 3                    | 8              | 22.3                  | 265    | 29467  | 5    | Target of myb1 (Chicken) (Fragment)                                                                                                                                                                 |
| 3803                     | B0QY01           | 3                    | 8              | 17.6                  | 335    | 37023  | 4.8  | Uncharacterized protein                                                                                                                                                                             |
| 3803                     | E7EPD0           | 3                    | 8              | 13                    | 454    | 49597  | 5    | cDNA FLJ54716, highly similar to Target of Myb protein 1                                                                                                                                            |
| 3803                     | B4DJ44           | 3                    | 8              | 13                    | 454    | 49578  | 5.1  | Isoform 2 of Target of Myb protein 1                                                                                                                                                                |
| 3803                     | O60784-2         | 3                    | 8              | 12                    | 493    | 53875  | 4.7  | Target of Myb protein 1                                                                                                                                                                             |
| 3803                     | O60784           | 3                    | 8              | 12                    | 492    | 53818  | 4.7  | Uncharacterized protein                                                                                                                                                                             |
| 3803                     | E7EPZ3           | 3                    | 8              | 11.8                  | 501    | 54852  | 4.8  | cDNA FLJ54710, highly similar to Target of Myb protein 1                                                                                                                                            |
| 3803                     | B4DKQ5           | 3                    | 8              | 11.8                  | 501    | 54832  | 4.8  | Phosphomannomutase 1                                                                                                                                                                                |
| 3804                     | Q92871           | 3                    | 3              | 17.6                  | 262    | 29747  | 5.7  | SFT2 domain containing 2                                                                                                                                                                            |
| 3805                     | Q5TIH2           | 3                    | 5              | 25.9                  | 108    | 11756  | 8.1  | Vesicle transport protein SFT2B                                                                                                                                                                     |
| 3805                     | O95562           | 3                    | 5              | 17.5                  | 160    | 17779  | 9.1  | Sulfotransferase 1A1                                                                                                                                                                                |
| 3806                     | P50225           | 3                    | 4              | 17.3                  | 295    | 34165  | 6.6  | RNA-binding protein 38 (RNA-binding motif protein 38) (RNA-binding region-containing protein 1) (HSRNASEB) (ssDNA-binding protein SEB4) (CLL-associated antigen KW-5).                              |
| 3807                     | UPI000002B290    | 3                    | 3              | 33.3                  | 123    | 13604  | 9.5  | RNA-binding protein 38                                                                                                                                                                              |
| 3807                     | Q9H0Z9           | 3                    | 3              | 17.2                  | 239    | 25498  | 8.6  | PMCA4b (Fragment)                                                                                                                                                                                   |
| 3808                     | A1X4Q1           | 3                    | 3              | 17                    | 230    | 26056  | 5.3  | Isoform ZB of Plasma membrane calcium-transporting ATPase 4                                                                                                                                         |
| 3808                     | P23634-7         | 3                    | 3              | 3.3                   | 1193   | 132594 | 6.2  | Putative uncharacterized protein DKFZp686M088                                                                                                                                                       |
| 3808                     | Q68DH9           | 3                    | 3              | 3.2                   | 1205   | 133874 | 6.5  | Isoform ZD of Plasma membrane calcium-transporting ATPase 4                                                                                                                                         |
| 3808                     | P23634-8         | 3                    | 3              | 3.2                   | 1229   | 136583 | 6.4  | Isoform XB of Plasma membrane calcium-transporting ATPase 4                                                                                                                                         |
| 3808                     | P23634-6         | 3                    | 3              | 3.2                   | 1205   | 133930 | 6.4  | Plasma membrane calcium-transporting ATPase 4                                                                                                                                                       |
| 3808                     | P23634           | 3                    | 3              | 3.1                   | 1241   | 137920 | 6.6  | 2-oxoglutarate and iron-dependent oxygenase domain-containing protein 2                                                                                                                             |
| 3809                     | Q6N063           | 3                    | 4              | 16.9                  | 350    | 38996  | 5.7  |                                                                                                                                                                                                     |



Table S1. Proteins identified in the OVCAR-3 tumor supernatant by two or more unique peptides.

| Protein or Protein Group | Accession Number | Unique Peptide Count | Spectrum Count | Sequence Coverage (%) | Length | MolWt | pI  | Descriptive Name                                                                                                                                     |
|--------------------------|------------------|----------------------|----------------|-----------------------|--------|-------|-----|------------------------------------------------------------------------------------------------------------------------------------------------------|
| 3850                     | P57081-3         | 3                    | 3              | 18                    | 266    | 29946 | 7.4 | isoform 3 of tRNA (guanine-N(7)-)-methyltransferase subunit WDR4                                                                                     |
| 3850                     | P57081           | 3                    | 3              | 11.7                  | 412    | 45490 | 7.1 | tRNA (guanine-N(7)-)-methyltransferase subunit WDR4                                                                                                  |
| 3850                     | P57081-2         | 3                    | 3              | 11.7                  | 411    | 45362 | 6.9 | isoform 2 of tRNA (guanine-N(7)-)-methyltransferase subunit WDR4                                                                                     |
| 3851                     | Q9H6Y2-2         | 3                    | 3              | 27.3                  | 165    | 18180 | 5.4 | isoform 2 of WD repeat-containing protein 55                                                                                                         |
| 3851                     | Q9H6Y2           | 3                    | 3              | 11.7                  | 383    | 42070 | 4.9 | WD repeat-containing protein 55                                                                                                                      |
| 3852                     | Q9Y3B9           | 3                    | 5              | 11.7                  | 282    | 31484 | 5.5 | RRP15-like protein                                                                                                                                   |
| 3853                     | Q9H1Y0-2         | 3                    | 3              | 16.2                  | 197    | 22931 | 6.2 | isoform short of Autophagy protein 5                                                                                                                 |
| 3853                     | B7Z5Y6           | 3                    | 3              | 16.2                  | 197    | 22989 | 6   | cDNA FLJ50845, highly similar to Autophagy protein 5                                                                                                 |
| 3853                     | B3KMH8           | 3                    | 3              | 11.6                  | 275    | 32375 | 5.9 | Autophagy protein 5                                                                                                                                  |
| 3853                     | Q9H1Y0           | 3                    | 3              | 11.6                  | 275    | 32447 | 5.8 | Autophagy protein 5                                                                                                                                  |
| 3854                     | Q03426           | 3                    | 4              | 11.6                  | 396    | 42451 | 6.5 | mevalonate kinase                                                                                                                                    |
| 3854                     | Q59ET9           | 3                    | 4              | 10.9                  | 421    | 44771 | 6.6 | mevalonate kinase variant (Fragment)                                                                                                                 |
| 3855                     | Q9H467           | 3                    | 3              | 11.5                  | 287    | 32009 | 4.8 | CUE domain-containing protein 2                                                                                                                      |
| 3856                     | P57060           | 3                    | 4              | 11.3                  | 319    | 36332 | 5.9 | RWD domain-containing protein 2B                                                                                                                     |
| 3856                     | Q53FD2           | 3                    | 4              | 11.3                  | 319    | 36360 | 5.9 | chromosome 21 open reading frame 6 variant (Fragment)                                                                                                |
| 3857                     | Q9BRP1           | 3                    | 6              | 11.2                  | 358    | 39417 | 4.9 | programmed cell death protein 2-like                                                                                                                 |
| 3858                     | B4DTK9           | 3                    | 3              | 13.3                  | 443    | 48358 | 7.2 | PML                                                                                                                                                  |
| 3858                     | A4VC19           | 3                    | 3              | 10.9                  | 540    | 59571 | 6.1 | PML protein (Fragment)                                                                                                                               |
| 3858                     | P29590-6         | 3                    | 3              | 7.2                   | 819    | 90986 | 6.6 | isoform PML-9 of Protein PML                                                                                                                         |
| 3858                     | P29590-11        | 3                    | 3              | 7.1                   | 834    | 92564 | 6.3 | isoform PML-11 of Protein PML                                                                                                                        |
| 3858                     | P29590-7         | 3                    | 3              | 6.8                   | 865    | 95677 | 6.2 | isoform PML-10 of Protein PML                                                                                                                        |
| 3858                     | P29590           | 3                    | 3              | 6.7                   | 882    | 97551 | 6.2 | Protein PML                                                                                                                                          |
| 3859                     | Q6P6C2-2         | 3                    | 7              | 12.7                  | 394    | 44256 | 9.1 | isoform 2 of Probable alpha-ketoglutarate-dependent dioxygenase ABH5                                                                                 |
| 3859                     | Q6P6C2           | 3                    | 7              | 10.9                  | 458    | 51409 | 8.4 | Probable alpha-ketoglutarate-dependent dioxygenase ABH5                                                                                              |
| 3860                     | A8K7R5           | 3                    | 4              | 10.6                  | 416    | 46367 | 6   | cDNA FLJ78720, highly similar to sapiens caspase 9, apoptosis-related cysteine peptidase (CASP9), transcript variant alpha, mRNA                     |
| 3860                     | A8K7U6           | 3                    | 4              | 10.6                  | 416    | 46337 | 6.2 | cDNA FLJ5893, highly similar to sapiens caspase 9, apoptosis-related cysteine peptidase (CASP9), transcript variant alpha, mRNA                      |
| 3861                     | B2RAA8           | 3                    | 3              | 10.6                  | 282    | 31137 | 5.1 | cDNA, FLJ94802                                                                                                                                       |
| 3861                     | Q9BR61           | 3                    | 3              | 10.6                  | 282    | 31151 | 5.1 | Acyl-CoA-binding domain-containing protein 6                                                                                                         |
| 3862                     | Q9BQC3           | 3                    | 4              | 10.6                  | 489    | 52083 | 5.5 | Diphthamide biosynthesis protein 2                                                                                                                   |
| 3863                     | Q9NRF8           | 3                    | 5              | 10.6                  | 586    | 65678 | 6.9 | CTP synthase 2                                                                                                                                       |
| 3864                     | B4DKL4           | 3                    | 4              | 12.4                  | 493    | 54498 | 8.9 | cDNA FLJ55699, highly similar to sapiens liver-specific bHLH-Zip transcription factor (LISCH7), transcript variant 3, mRNA                           |
| 3864                     | A6NDW3           | 3                    | 4              | 10.5                  | 581    | 64053 | 8.8 | Uncharacterized protein                                                                                                                              |
| 3864                     | Q9BWS2           | 3                    | 4              | 10.5                  | 582    | 64347 | 7.3 | LSR protein (Fragment)                                                                                                                               |
| 3864                     | Q9BT33           | 3                    | 4              | 10.4                  | 588    | 64894 | 7.3 | LSR protein (Fragment)                                                                                                                               |
| 3864                     | Q86X29-2         | 3                    | 4              | 10.3                  | 591    | 65587 | 8   | isoform 2 of Lipolysis-stimulated lipoprotein receptor                                                                                               |
| 3864                     | Q86X29-3         | 3                    | 4              | 9.7                   | 629    | 69429 | 8.1 | isoform 3 of Lipolysis-stimulated lipoprotein receptor                                                                                               |
| 3864                     | E9PHD4           | 3                    | 4              | 9.7                   | 630    | 69558 | 8.1 | Uncharacterized protein                                                                                                                              |
| 3864                     | Q86X29           | 3                    | 4              | 9.4                   | 649    | 71439 | 8   | Lipolysis-stimulated lipoprotein receptor                                                                                                            |
| 3865                     | Q86YA9           | 3                    | 3              | 12.3                  | 552    | 61379 | 6   | Golgi associated, gamma adaptin ear containing, ARF binding protein 1                                                                                |
| 3865                     | Q9UJY5-2         | 3                    | 3              | 11.2                  | 606    | 66563 | 5.1 | isoform 2 of ADP-ribosylation factor-binding protein GGA1                                                                                            |
| 3865                     | UPI0001C53D2C    | 3                    | 3              | 10.7                  | 635    | 69815 | 5.2 | ADP-ribosylation factor-binding protein GGA1 isoform 4                                                                                               |
| 3865                     | Q9UJY5           | 3                    | 3              | 10.6                  | 639    | 70384 | 5.3 | ADP-ribosylation factor-binding protein GGA1                                                                                                         |
| 3865                     | Q6IC75           | 3                    | 3              | 10.4                  | 656    | 72277 | 5.4 | GGA1 protein                                                                                                                                         |
| 3866                     | UPI000022ACCC    | 3                    | 6              | 12.4                  | 362    | 40867 | 7   | tubulointerstitial nephritis antigen-like isoform 3                                                                                                  |
| 3866                     | B4DPK6           | 3                    | 6              | 10.3                  | 436    | 48808 | 7.3 | cDNA FLJ55020, highly similar to Tubulointerstitial nephritis antigen-like                                                                           |
| 3866                     | Q9GZM7           | 3                    | 6              | 9.6                   | 467    | 52387 | 7   | Tubulointerstitial nephritis antigen-like                                                                                                            |
| 3867                     | Q95400           | 3                    | 4              | 10.3                  | 341    | 37646 | 4.6 | CD2 antigen cytoplasmic tail-binding protein 2                                                                                                       |
| 3868                     | Q96013           | 3                    | 87             | 10.2                  | 591    | 64072 | 9.7 | Serine/threonine-protein kinase PAK 4                                                                                                                |
| 3869                     | B2R8K8           | 3                    | 3              | 9.9                   | 302    | 34537 | 8.3 | cDNA, FLJ93949, highly similar to sapiens NIMA (never in mitosis gene a)-related kinase 7 (NEK7), mRNA                                               |
| 3869                     | Q8TDX7           | 3                    | 3              | 9.9                   | 302    | 34551 | 8.3 | Serine/threonine-protein kinase Nek7                                                                                                                 |
| 3870                     | UPI00001404C1    | 3                    | 3              | 12.6                  | 341    | 38073 | 7.7 | UPI00001404C1 UniRef100 entry                                                                                                                        |
| 3870                     | B3KM88           | 3                    | 3              | 9.8                   | 441    | 49341 | 6.3 | cDNA FLJ10527 fis, clone NT2RP2000932, highly similar to Ankyrin repeat and MYND domain-containing protein 2                                         |
| 3870                     | Q8IV38           | 3                    | 3              | 9.8                   | 441    | 49299 | 6.3 | Ankyrin repeat and MYND domain-containing protein 2                                                                                                  |
| 3870                     | B3KN56           | 3                    | 3              | 9.8                   | 441    | 49352 | 6.4 | cDNA FLJ13642 fis, clone PLACE1011263, highly similar to Ankyrin repeat and MYND domain-containing protein 2                                         |
| 3871                     | Q86Y37-2         | 3                    | 3              | 11.9                  | 303    | 33584 | 5.1 | isoform 2 of Uncharacterized protein C10orf46                                                                                                        |
| 3871                     | Q86Y37           | 3                    | 3              | 9.8                   | 369    | 41064 | 5.2 | Uncharacterized protein C10orf46                                                                                                                     |
| 3872                     | B4DPW1           | 3                    | 11             | 9.7                   | 462    | 52599 | 6.5 | cDNA FLJ59373, highly similar to sapiens pericentrin 1 (PCNT1), mRNA                                                                                 |
| 3872                     | Q9BW27           | 3                    | 11             | 6.9                   | 656    | 75019 | 5.6 | Nuclear pore complex protein Nup85                                                                                                                   |
| 3873                     | A8K3W7           | 3                    | 3              | 9.6                   | 429    | 49960 | 6.6 | cDNA FLJ76271, highly similar to sapiens protein O-fucosyltransferase 2 (POFUT2), transcript variant 3, mRNA                                         |
| 3873                     | Q9Y2G5           | 3                    | 3              | 9.6                   | 429    | 49976 | 6.6 | GDP-fucose protein O-fucosyltransferase 2                                                                                                            |
| 3874                     | Q9Y6W5           | 3                    | 6              | 9.6                   | 498    | 54284 | 5.5 | Wiskott-Aldrich syndrome protein family member 2                                                                                                     |
| 3875                     | B7Z7E2           | 3                    | 3              | 11.3                  | 592    | 62921 | 5.9 | cDNA FLJ58548, highly similar to ADP-ribosylation factor-binding protein GGA3                                                                        |
| 3875                     | B7Z456           | 3                    | 3              | 11.1                  | 601    | 64208 | 5.5 | cDNA FLJ59569, highly similar to ADP-ribosylation factor-binding protein GGA3                                                                        |
| 3875                     | B7Z7M9           | 3                    | 3              | 10.3                  | 651    | 70088 | 6.2 | cDNA FLJ58553, highly similar to ADP-ribosylation factor-binding protein GGA3                                                                        |
| 3875                     | Q9NZ52-2         | 3                    | 3              | 9.7                   | 690    | 74470 | 5.3 | isoform short of ADP-ribosylation factor-binding protein GGA3                                                                                        |
| 3875                     | A8K6M0           | 3                    | 3              | 9.7                   | 690    | 74469 | 5.3 | cDNA FLJ75879, highly similar to sapiens GGA3 short isoform                                                                                          |
| 3875                     | A8K6I6           | 3                    | 3              | 9.3                   | 723    | 78256 | 5.7 | cDNA FLJ75092, highly similar to sapiens golgi associated, gamma adaptin ear containing, ARF binding protein 3 (GGA3), transcript variant long, mRNA |
| 3875                     | Q9NZ52           | 3                    | 3              | 9.3                   | 723    | 78315 | 5.6 | ADP-ribosylation factor-binding protein GGA3                                                                                                         |
| 3876                     | B7Z4K6           | 3                    | 3              | 10.8                  | 305    | 33615 | 8.3 | cDNA FLJ51996, highly similar to Deoxyribonuclease-2-alpha (EC 3.1.22.1)                                                                             |
| 3876                     | C0LQF2           | 3                    | 3              | 9.6                   | 344    | 38181 | 8.3 | Deoxyribonuclease II (Fragment)                                                                                                                      |
| 3876                     | B3KQS9           | 3                    | 3              | 9.2                   | 360    | 39566 | 8   | cDNA PSEC0141 fis, clone PLACE1005913, highly similar to Deoxyribonuclease-2-alpha (EC 3.1.22.1)                                                     |
| 3876                     | O00115           | 3                    | 3              | 9.2                   | 360    | 39581 | 8   | Deoxyribonuclease-2-alpha                                                                                                                            |
| 3877                     | O00425           | 3                    | 7              | 9.2                   | 579    | 63705 | 8.9 | Insulin-like growth factor 2 mRNA-binding protein 3                                                                                                  |
| 3878                     | B4DP28           | 3                    | 3              | 9                     | 435    | 47172 | 5.2 | cDNA FLJ51260, highly similar to DNA polymerase subunit delta 2 (EC 2.7.7.7)                                                                         |
| 3878                     | C9JEC6           | 3                    | 3              | 8.6                   | 455    | 49613 | 5.6 | Uncharacterized protein                                                                                                                              |
| 3878                     | P49005           | 3                    | 3              | 8.3                   | 469    | 51289 | 5.6 | DNA polymerase delta subunit 2                                                                                                                       |
| 3879                     | Q9HAT2-2         | 3                    | 3              | 9.6                   | 488    | 54572 | 7.3 | isoform 2 of Sialate O-acetyltransferase                                                                                                             |
| 3879                     | Q9HAT2           | 3                    | 3              | 9                     | 523    | 58315 | 7.3 | Sialate O-acetyltransferase                                                                                                                          |

Table S1. Proteins identified in the OVCAR-3 tumor supernatant by two or more unique peptides.

| Protein or Protein Group | Accession Number | Unique Peptide Count | Spectrum Count | Sequence Coverage (%) | Length | MolWt  | pI  | Descriptive Name                                                                                                                                |
|--------------------------|------------------|----------------------|----------------|-----------------------|--------|--------|-----|-------------------------------------------------------------------------------------------------------------------------------------------------|
| 3880                     | B3KS50           | 3                    | 6              | 8.9                   | 447    | 51759  | 8.5 | cDNA FLJ35494 fis, clone SMINT2008720, highly similar to                                                                                        |
| 3880                     | P09914           | 3                    | 6              | 8.4                   | 478    | 55360  | 7.2 | Interferon-induced protein with tetratricopeptide repeats 1                                                                                     |
| 3881                     | Q13613-2         | 3                    | 7              | 10.2                  | 568    | 63330  | 7.5 | Interferon-induced protein with tetratricopeptide repeats 1                                                                                     |
| 3881                     | Q13613           | 3                    | 7              | 8.7                   | 665    | 74678  | 7.1 | Isoform 1A of Myotubularin-related protein 1                                                                                                    |
| 3881                     | UPI000004FD4F    | 3                    | 7              | 8.6                   | 673    | 75718  | 7.4 | Myotubularin-related protein 1                                                                                                                  |
| 3882                     | Q8IWE2           | 3                    | 3              | 8.7                   | 563    | 60742  | 4.7 | UPI000004FD4F UniRef100 entry                                                                                                                   |
| 3883                     | Q96AB6           | 3                    | 3              | 8.7                   | 310    | 34677  | 6.3 | Protein N-terminal asparagine amidohydrolase                                                                                                    |
| 3884                     | Q96L92-3         | 3                    | 3              | 8.9                   | 528    | 59811  | 6.3 | Isoform 2 of Sorting nexin-27                                                                                                                   |
| 3884                     | Q96L92           | 3                    | 3              | 8.7                   | 541    | 61265  | 6.5 | Sorting nexin-27                                                                                                                                |
| 3885                     | B4DYC0           | 3                    | 6              | 8.6                   | 757    | 84392  | 5.2 | cDNA FLJ57012, highly similar to AT-rich interactive domain-containing protein 1B                                                               |
| 3885                     | E9PD33           | 3                    | 6              | 8.6                   | 757    | 84408  | 5.2 | Uncharacterized protein                                                                                                                         |
| 3885                     | UPI0001D3BCFD    | 3                    | 6              | 3.7                   | 1758   | 190696 | 6.3 | UPI0001D3BCFD UniRef100 entry                                                                                                                   |
| 3885                     | Q8NFD5-2         | 3                    | 6              | 2.9                   | 2249   | 237659 | 6.7 | Isoform 2 of AT-rich interactive domain-containing protein 1B                                                                                   |
| 3885                     | Q8NFD5           | 3                    | 6              | 2.9                   | 2236   | 236121 | 6.7 | AT-rich interactive domain-containing protein 1B                                                                                                |
| 3885                     | Q8NFD5-3         | 3                    | 6              | 2.8                   | 2289   | 241461 | 6.7 | Isoform 3 of AT-rich interactive domain-containing protein 1B                                                                                   |
| 3886                     | B4E0X9           | 3                    | 3              | 11.3                  | 390    | 43422  | 5.7 | cDNA FLJ54223, highly similar to Transmembrane protein 1                                                                                        |
| 3886                     | B4D117           | 3                    | 3              | 8.5                   | 518    | 57526  | 5.9 | cDNA FLJ55683, highly similar to Transmembrane protein 1                                                                                        |
| 3886                     | P48553           | 3                    | 3              | 3.5                   | 1259   | 142189 | 6   | Trafficking protein particle complex subunit 10                                                                                                 |
| 3887                     | Q7Z434-2         | 3                    | 4              | 33.3                  | 138    | 15996  | 7   | Isoform 2 of Mitochondrial antiviral-signaling protein                                                                                          |
| 3887                     | Q7Z434           | 3                    | 4              | 8.5                   | 540    | 56528  | 5.5 | Mitochondrial antiviral-signaling protein                                                                                                       |
| 3888                     | Q8N543           | 3                    | 9              | 8.5                   | 542    | 63246  | 5.1 | 2-oxoglutarate and iron-dependent oxygenase domain-containing protein 1                                                                         |
| 3889                     | A8MWB4           | 3                    | 3              | 8.3                   | 398    | 46427  | 5.5 | Uncharacterized protein                                                                                                                         |
| 3889                     | Q15438-2         | 3                    | 3              | 8.3                   | 397    | 46356  | 5.5 | Isoform 2 of Cytohesin-1                                                                                                                        |
| 3889                     | Q15438           | 3                    | 3              | 8.3                   | 398    | 46413  | 5.5 | Cytohesin-1                                                                                                                                     |
| 3890                     | B4DE20           | 3                    | 3              | 8.3                   | 568    | 65076  | 7.4 | cDNA FLJ57256, highly similar to Plexin-A1                                                                                                      |
| 3890                     | Q9UIW2           | 3                    | 3              | 2.5                   | 1896   | 211066 | 6.9 | Plexin-A1                                                                                                                                       |
| 3891                     | B4E1J2           | 3                    | 8              | 8.2                   | 461    | 50840  | 4.8 | cDNA FLJ54229                                                                                                                                   |
| 3891                     | E7ENZ8           | 3                    | 8              | 8.2                   | 461    | 50824  | 4.8 | Uncharacterized protein                                                                                                                         |
| 3891                     | Q9NRY5           | 3                    | 8              | 7.5                   | 505    | 55468  | 4.9 | Protein FAM114A2                                                                                                                                |
| 3891                     | UPI0001AE74C1    | 3                    | 8              | 7.4                   | 512    | 56242  | 4.9 | UPI0001AE74C1 UniRef100 entry                                                                                                                   |
| 3892                     | Q969S3           | 3                    | 3              | 8.2                   | 477    | 54272  | 6.2 | Zinc finger protein 622                                                                                                                         |
| 3893                     | Q96I24           | 3                    | 11             | 8.2                   | 572    | 61640  | 8.4 | Far upstream element-binding protein 3                                                                                                          |
| 3894                     | A6NG79           | 3                    | 5              | 8.1                   | 459    | 48960  | 5.5 | Uncharacterized protein                                                                                                                         |
| 3894                     | E9PGC6           | 3                    | 5              | 7.9                   | 467    | 50376  | 7.5 | Uncharacterized protein                                                                                                                         |
| 3894                     | Q96FT4           | 3                    | 5              | 7.5                   | 491    | 52422  | 5.1 | Papillary renal cell carcinoma (Translocation-associated)                                                                                       |
| 3894                     | Q92733           | 3                    | 5              | 7.5                   | 491    | 52418  | 5.1 | Proline-rich protein PRCC                                                                                                                       |
| 3895                     | Q59H78           | 3                    | 4              | 8.1                   | 583    | 61473  | 7.4 | PREDICTED: filaggrin variant (Fragment)                                                                                                         |
| 3896                     | Q14738-3         | 3                    | 9              | 9.7                   | 496    | 58453  | 6.8 | Isoform Delta-3 of Serine/threonine-protein phosphatase 2A 56 kDa regulatory subunit delta isoform                                              |
| 3896                     | Q59EF0           | 3                    | 9              | 9.5                   | 503    | 59336  | 7.4 | Delta isoform of regulatory subunit B56, protein phosphatase 2A isoform 1 variant (Fragment)                                                    |
| 3896                     | B4DSD7           | 3                    | 9              | 8.6                   | 559    | 65404  | 7.8 | cDNA FLJ55863, highly similar to Serine/threonine-protein phosphatase 2A 56 kDa regulatory subunit delta isoform                                |
| 3896                     | Q14738-2         | 3                    | 9              | 8.4                   | 570    | 66181  | 7.6 | Isoform Delta-2 of Serine/threonine-protein phosphatase 2A 56 kDa regulatory subunit delta isoform                                              |
| 3896                     | E9PFR3           | 3                    | 9              | 8.1                   | 594    | 69117  | 8.1 | Uncharacterized protein                                                                                                                         |
| 3896                     | A8K6Y2           | 3                    | 9              | 8                     | 602    | 69979  | 7.8 | cDNA FLJ76895, highly similar to sapiens protein phosphatase 2, regulatory subunit B (B56), delta isoform (PPP2R5D), transcript variant 1, mRNA |
| 3896                     | Q14738           | 3                    | 9              | 8                     | 602    | 69992  | 8.1 | Serine/threonine-protein phosphatase 2A 56 kDa regulatory subunit delta isoform                                                                 |
| 3897                     | B4E2S7           | 3                    | 4              | 8                     | 363    | 39812  | 5.7 | cDNA FLJ58780, highly similar to sapiens lysosomal-associated membrane protein 2 (LAMP2), transcript variant LAMP2B, mRNA                       |
| 3897                     | Q6Q3G8           | 3                    | 4              | 7.1                   | 411    | 45170  | 5.9 | Lysosomal-associated membrane protein 2, isoform CRA_b                                                                                          |
| 3897                     | P13473-2         | 3                    | 4              | 7.1                   | 410    | 44956  | 5.7 | Isoform LAMP-2B of Lysosome-associated membrane glycoprotein 2                                                                                  |
| 3897                     | P13473           | 3                    | 4              | 7.1                   | 410    | 44961  | 5.6 | Lysosome-associated membrane glycoprotein 2                                                                                                     |
| 3898                     | Q6RW13           | 3                    | 10             | 30.2                  | 159    | 17419  | 6.1 | Type-1 angiotensin II receptor-associated protein                                                                                               |
| 3898                     | D7RF68           | 3                    | 10             | 8                     | 597    | 66206  | 8.9 | AGTRAP-BRAF fusion protein                                                                                                                      |
| 3899                     | B1AP16           | 3                    | 3              | 11.9                  | 293    | 32190  | 5.5 | CD55 molecule, decay accelerating factor for complement (Cromer blood group) (Fragment)                                                         |
| 3899                     | UPI0001F782BB    | 3                    | 3              | 10.7                  | 326    | 35809  | 5.5 | Complement decay-accelerating factor precursor (CD55 antigen).                                                                                  |
| 3899                     | E7ER69           | 3                    | 3              | 9.8                   | 358    | 38964  | 7.4 | Uncharacterized protein                                                                                                                         |
| 3899                     | Q14UF5           | 3                    | 3              | 9.6                   | 364    | 39759  | 7.6 | Decay-accelerating factor splicing variant 2                                                                                                    |
| 3899                     | E9PSH2           | 3                    | 3              | 9.3                   | 377    | 41228  | 8   | Uncharacterized protein                                                                                                                         |
| 3899                     | P08174           | 3                    | 3              | 9.2                   | 381    | 41400  | 7.6 | Complement decay-accelerating factor                                                                                                            |
| 3899                     | Q14UF4           | 3                    | 3              | 9.1                   | 384    | 41900  | 7.9 | Decay-accelerating factor splicing variant 3                                                                                                    |
| 3899                     | Q14UF6           | 3                    | 3              | 8                     | 439    | 48513  | 7.9 | Decay-accelerating factor splicing variant 1                                                                                                    |
| 3899                     | P08174-2         | 3                    | 3              | 8                     | 440    | 48717  | 8.4 | Isoform 1 of Complement decay-accelerating factor                                                                                               |
| 3899                     | B1AP13           | 3                    | 3              | 7.9                   | 444    | 49338  | 8.8 | CD55 molecule, decay accelerating factor for complement (Cromer blood group)                                                                    |
| 3899                     | Q14UF3           | 3                    | 3              | 6.7                   | 525    | 56218  | 8.5 | Decay-accelerating factor splicing variant 4                                                                                                    |
| 3899                     | Q14UF2           | 3                    | 3              | 6.4                   | 551    | 59038  | 8.8 | Decay-accelerating factor splicing variant 5                                                                                                    |
| 3900                     | Q8N9N2-2         | 3                    | 4              | 8.1                   | 357    | 41228  | 5.5 | Isoform 2 of Activating signal cointegrator 1 complex subunit 1                                                                                 |
| 3900                     | B7Z518           | 3                    | 4              | 7.7                   | 379    | 43582  | 5.6 | cDNA FLJ55237, highly similar to sapiens activating signal cointegrator 1 complex subunit 1 (ASCC1), mRNA                                       |
| 3901                     | Q9NXW2           | 3                    | 5              | 7.7                   | 375    | 41819  | 8.5 | DnaJ log subfamily B member 12                                                                                                                  |
| 3901                     | Q9NXW2-2         | 3                    | 5              | 7.7                   | 377    | 42263  | 8.5 | Isoform 2 of DnaJ log subfamily B member 12                                                                                                     |
| 3901                     | UPI0000E592BF    | 3                    | 5              | 7.1                   | 409    | 45490  | 9.4 | dnaJ log subfamily B member 12                                                                                                                  |
| 3902                     | Q5JR89           | 3                    | 8              | 19.2                  | 287    | 32448  | 9.2 | Kinesin family member 2C (Fragment)                                                                                                             |
| 3902                     | Q5JR91           | 3                    | 8              | 16.4                  | 336    | 37922  | 9.1 | Kinesin family member 2C (Fragment)                                                                                                             |
| 3902                     | B7Z6Q6           | 3                    | 8              | 8                     | 684    | 76983  | 8.1 | cDNA FLJ54088, highly similar to Kinesin-like protein KIF2C                                                                                     |
| 3902                     | A8K3S3           | 3                    | 8              | 7.6                   | 725    | 81341  | 7.8 | cDNA FLJ75664, highly similar to sapiens kinesin family member 2C (KIF2C), mRNA                                                                 |
| 3902                     | Q99661           | 3                    | 8              | 7.6                   | 725    | 81313  | 7.8 | Kinesin-like protein KIF2C                                                                                                                      |
| 3903                     | UPI000198CADE    | 3                    | 3              | 11.4                  | 621    | 69561  | 5.9 | UPI000198CADE UniRef100 entry                                                                                                                   |
| 3903                     | Q53H56           | 3                    | 3              | 7.8                   | 916    | 103975 | 5.4 | Ubiquitin carboxyl-terminal hydrolase (Fragment)                                                                                                |
| 3903                     | Q13107-2         | 3                    | 3              | 7.8                   | 916    | 103958 | 5.5 | Isoform 2 of Ubiquitin carboxyl-terminal hydrolase 4                                                                                            |
| 3903                     | Q13107           | 3                    | 3              | 7.4                   | 963    | 108565 | 5.7 | Ubiquitin carboxyl-terminal hydrolase 4                                                                                                         |
| 3903                     | Q53FJ3           | 3                    | 3              | 7.4                   | 963    | 108591 | 5.7 | Ubiquitin carboxyl-terminal hydrolase (Fragment)                                                                                                |
| 3904                     | Q59EA5           | 3                    | 4              | 11.4                  | 298    | 34219  | 6.8 | Tripartite motif-containing 38 variant (Fragment)                                                                                               |
| 3904                     | B2R862           | 3                    | 4              | 7.3                   | 465    | 53400  | 7   | cDNA, FLJ93754, highly similar to sapiens tripartite motif-containing 38 (TRIM38), mRNA                                                         |
| 3904                     | O00635           | 3                    | 4              | 7.3                   | 465    | 53416  | 7   | Tripartite motif-containing protein 38                                                                                                          |
| 3905                     | Q86TV4           | 3                    | 9              | 7.2                   | 545    | 60023  | 5.1 | Full-length cDNA clone CS0D1085Y108 of Placenta of sapiens (human) (Fragment)                                                                   |
| 3906                     | Q86V21           | 3                    | 4              | 7.1                   | 672    | 75144  | 6.2 | Acetoacetyl-CoA synthetase                                                                                                                      |

Table S1. Proteins identified in the OVCAR-3 tumor supernatant by two or more unique peptides.

| Protein or Protein Group | Accession Number | Unique Peptide Count | Spectrum Count | Sequence Coverage (%) | Length | MolWt  | pI  | Descriptive Name                                                                                                                                     |
|--------------------------|------------------|----------------------|----------------|-----------------------|--------|--------|-----|------------------------------------------------------------------------------------------------------------------------------------------------------|
| 3907                     | A8K045           | 3                    | 3              | 7                     | 489    | 55238  | 5.6 | cDNA FLJ76988, highly similar to sapiens HSPB (heat shock 27kDa) associated protein 1 (HSPBAP1), mRNA                                                |
| 3907                     | Q96EW2           | 3                    | 3              | 7                     | 488    | 55167  | 5.6 | HSPB1-associated protein 1                                                                                                                           |
| 3908                     | A8K3R2           | 3                    | 6              | 7                     | 746    | 83570  | 6.1 | cDNA FLJ78061, highly similar to sapiens block of proliferation 1, mRNA                                                                              |
| 3908                     | Q14137           | 3                    | 6              | 7                     | 746    | 83630  | 6.2 | Ribosome biogenesis protein BOP1                                                                                                                     |
| 3908                     | B2RDNA           | 3                    | 6              | 7                     | 746    | 83586  | 6.2 | cDNA, FLJ96693, highly similar to sapiens block of proliferation 1 (BOP1), mRNA                                                                      |
| 3909                     | Q9NXH9-2         | 3                    | 3              | 7.3                   | 630    | 69306  | 7.2 | Isoform 2 of N(2),N(2)-dimethylguanosine tRNA methyltransferase                                                                                      |
| 3909                     | A8K8L2           | 3                    | 3              | 7                     | 659    | 72148  | 7.8 | cDNA FLJ77676, highly similar to sapiens TRM1 tRNA methyltransferase 1 log (S. cerevisiae) (TRMT1), mRNA                                             |
| 3909                     | Q9NXH9           | 3                    | 3              | 7                     | 659    | 72234  | 7.6 | N(2),N(2)-dimethylguanosine tRNA methyltransferase                                                                                                   |
| 3910                     | Q9UI10-3         | 3                    | 3              | 7.3                   | 522    | 57458  | 9.4 | Isoform 3 of Translation initiation factor eIF-2B subunit delta                                                                                      |
| 3910                     | Q9UI10           | 3                    | 3              | 7.3                   | 523    | 57557  | 9.4 | Translation initiation factor eIF-2B subunit delta                                                                                                   |
| 3910                     | E7ERK9           | 3                    | 3              | 7                     | 544    | 59715  | 9.4 | Uncharacterized protein                                                                                                                              |
| 3910                     | Q9UI10-2         | 3                    | 3              | 7                     | 543    | 59616  | 9.4 | Isoform 2 of Translation initiation factor eIF-2B subunit delta                                                                                      |
| 3911                     | B2RAH1           | 3                    | 5              | 6.9                   | 726    | 80788  | 5.6 | cDNA, FLJ94913, highly similar to sapiens holocarboxylase synthetase(biotin-[propionyl-Coenzyme A-carboxylase (ATP-hydrolysing)]ligase) (HLCS), mRNA |
| 3911                     | P50747           | 3                    | 5              | 6.9                   | 726    | 80760  | 5.6 | Biotin--protein ligase                                                                                                                               |
| 3912                     | B4E212           | 3                    | 5              | 7.6                   | 700    | 77235  | 7.7 | Oxysterol-binding protein                                                                                                                            |
| 3912                     | B3KUL5           | 3                    | 5              | 6.9                   | 764    | 83943  | 8.3 | Oxysterol-binding protein                                                                                                                            |
| 3912                     | Q9BXB5           | 3                    | 5              | 6.9                   | 764    | 83970  | 8.3 | Oxysterol-binding protein-related protein 10                                                                                                         |
| 3913                     | Q94804           | 3                    | 3              | 6.9                   | 968    | 112135 | 6.9 | Serine/threonine-protein kinase 10                                                                                                                   |
| 3913                     | Q6NSK0           | 3                    | 3              | 6.9                   | 968    | 112121 | 6.9 | Serine/threonine kinase 10                                                                                                                           |
| 3914                     | Q13188           | 3                    | 4              | 7.1                   | 491    | 56301  | 5.2 | Serine/threonine-protein kinase 3                                                                                                                    |
| 3914                     | B3KYA7           | 3                    | 4              | 6.7                   | 519    | 59462  | 5.3 | cDNA FLJ16404 fis, clone UTERU2008019, highly similar to Serine/threonine-protein kinase 3 (EC 2.7.11.1)                                             |
| 3915                     | Q16222-2         | 3                    | 4              | 6.9                   | 505    | 57028  | 6.4 | Isoform AGX1 of UDP-N-acetylhexosamine pyrophosphorylase                                                                                             |
| 3915                     | Q16222           | 3                    | 4              | 6.7                   | 522    | 58769  | 6.3 | UDP-N-acetylhexosamine pyrophosphorylase                                                                                                             |
| 3915                     | Q16222-3         | 3                    | 4              | 6.7                   | 521    | 58682  | 6.3 | Isoform 3 of UDP-N-acetylhexosamine pyrophosphorylase                                                                                                |
| 3916                     | B3KX22           | 3                    | 3              | 6.5                   | 934    | 107932 | 6.1 | cDNA FLJ44514 fis, clone UTERU3002218                                                                                                                |
| 3916                     | Q96JG6           | 3                    | 3              | 6.3                   | 964    | 111174 | 6.2 | Coiled-coil domain-containing protein 132                                                                                                            |
| 3917                     | Q4VBY2           | 3                    | 5              | 10.4                  | 521    | 57583  | 7.7 | SEMA4B protein (Fragment)                                                                                                                            |
| 3917                     | Q7Z3N1           | 3                    | 5              | 7.9                   | 681    | 75402  | 6.8 | Putative uncharacterized protein DKFZp686A04130                                                                                                      |
| 3917                     | Q9NPR2-2         | 3                    | 5              | 7.3                   | 737    | 81403  | 6.2 | Isoform 2 of Semaphorin-4B                                                                                                                           |
| 3917                     | Q2NL81           | 3                    | 5              | 6.5                   | 837    | 92750  | 7   | Sema domain, immunoglobulin domain (Ig), transmembrane domain (TM) and short cytoplasmic domain, (Semaphorin) 4B                                     |
| 3917                     | Q9NPR2           | 3                    | 5              | 6.5                   | 832    | 92193  | 6.9 | Semaphorin-4B                                                                                                                                        |
| 3918                     | Q9H1I8           | 3                    | 4              | 6.5                   | 757    | 86360  | 5.2 | Activating signal cointegrator 1 complex subunit 2                                                                                                   |
| 3919                     | P57740           | 3                    | 4              | 6.4                   | 925    | 106374 | 5.4 | Nuclear pore complex protein Nup107                                                                                                                  |
| 3920                     | B2RCD8           | 3                    | 4              | 6.3                   | 584    | 61714  | 8.2 | cDNA, FLJ96012, highly similar to sapiens interferon regulatory factor 2 binding protein 1 (IRF2BP1), mRNA                                           |
| 3920                     | Q8IU81           | 3                    | 4              | 6.3                   | 584    | 61688  | 8.2 | Interferon regulatory factor 2-binding protein 1                                                                                                     |
| 3921                     | Q96M96           | 3                    | 8              | 7.2                   | 766    | 86626  | 6.1 | FYVE, RhoGEF and PH domain-containing protein 4                                                                                                      |
| 3921                     | B7Z8F9           | 3                    | 8              | 6.3                   | 878    | 98679  | 6.7 | cDNA FLJ56188, highly similar to FYVE, RhoGEF and PH domain-containing protein4                                                                      |
| 3921                     | E9PJX4           | 3                    | 8              | 6.3                   | 878    | 98695  | 6.7 | Uncharacterized protein                                                                                                                              |
| 3922                     | E9PQ61           | 3                    | 4              | 7.2                   | 652    | 72532  | 8.6 | Uncharacterized protein                                                                                                                              |
| 3922                     | B4DLG2           | 3                    | 4              | 6.2                   | 756    | 82772  | 8.6 | cDNA FLJ58196, highly similar to Zinc finger CCCH domain-containing protein 11A                                                                      |
| 3922                     | Q75152           | 3                    | 4              | 5.8                   | 810    | 89131  | 8.4 | Zinc finger CCCH domain-containing protein 11A                                                                                                       |
| 3923                     | P42898           | 3                    | 3              | 6.2                   | 656    | 74597  | 5.3 | Methylenetetrahydrofolate reductase                                                                                                                  |
| 3923                     | Q59GJ6           | 3                    | 3              | 6.1                   | 672    | 75049  | 6.3 | Methylenetetrahydrofolate reductase (Fragment)                                                                                                       |
| 3923                     | Q5SNW6           | 3                    | 3              | 5.9                   | 697    | 78965  | 5.7 | Methylenetetrahydrofolate reductase                                                                                                                  |
| 3924                     | Q6PJT7-4         | 3                    | 4              | 7.7                   | 571    | 64502  | 8.2 | Isoform 4 of Zinc finger CCCH domain-containing protein 14                                                                                           |
| 3924                     | Q6PJT7-3         | 3                    | 4              | 7.6                   | 579    | 65425  | 7.9 | Isoform 3 of Zinc finger CCCH domain-containing protein 14                                                                                           |
| 3924                     | Q6PJT7-7         | 3                    | 4              | 6.5                   | 673    | 75763  | 7.2 | Isoform 7 of Zinc finger CCCH domain-containing protein 14                                                                                           |
| 3924                     | B5MD57           | 3                    | 4              | 6.5                   | 673    | 75777  | 7.2 | Uncharacterized protein                                                                                                                              |
| 3924                     | UPI0001AE69BB    | 3                    | 4              | 6.2                   | 711    | 80035  | 7.3 | nuclear protein Ukp68 isoform 3                                                                                                                      |
| 3924                     | Q6PJT7-5         | 3                    | 4              | 6.2                   | 711    | 80021  | 7.3 | Isoform 5 of Zinc finger CCCH domain-containing protein 14                                                                                           |
| 3924                     | B4E2H4           | 3                    | 4              | 6                     | 730    | 82276  | 7.3 | cDNA FLJ56206, highly similar to sapiens nuclear protein Ukp68 , transcript variant 1, mRNA                                                          |
| 3924                     | UPI0001A4717A    | 3                    | 4              | 6                     | 730    | 82312  | 7.3 | zinc finger CCCH domain-containing protein 14 isoform 6                                                                                              |
| 3924                     | Q6PJT7-2         | 3                    | 4              | 6                     | 735    | 82805  | 7.3 | Isoform 2 of Zinc finger CCCH domain-containing protein 14                                                                                           |
| 3924                     | Q6PJT7           | 3                    | 4              | 6                     | 736    | 82876  | 7.3 | Zinc finger CCCH domain-containing protein 14                                                                                                        |
| 3924                     | B5MDV7           | 3                    | 4              | 6                     | 735    | 82819  | 7.3 | Uncharacterized protein                                                                                                                              |
| 3924                     | B5MBX9           | 3                    | 4              | 6                     | 736    | 82890  | 7.3 | Uncharacterized protein                                                                                                                              |
| 3925                     | B3KTC7           | 3                    | 4              | 5.9                   | 711    | 81070  | 6.2 | cDNA FLJ38069 fis, clone CTONG2015434, highly similar to DOUBLE-STRAND BREAK REPAIR PROTEIN MRE11A                                                   |
| 3925                     | P49959           | 3                    | 4              | 5.9                   | 708    | 80593  | 5.9 | Double-strand break repair protein MRE11A                                                                                                            |
| 3926                     | Q60518           | 3                    | 21             | 5.9                   | 1105   | 124713 | 5   | Ran-binding protein 6                                                                                                                                |
| 3927                     | Q9UPN7           | 3                    | 3              | 5.8                   | 881    | 96724  | 4.6 | Serine/threonine-protein phosphatase 6 regulatory subunit 1                                                                                          |
| 3928                     | Q9H6T3-2         | 3                    | 3              | 6                     | 631    | 71866  | 7.6 | Isoform 2 of RNA polymerase II-associated protein 3                                                                                                  |
| 3928                     | Q9H6T3           | 3                    | 3              | 5.7                   | 665    | 75719  | 6.8 | RNA polymerase II-associated protein 3                                                                                                               |
| 3929                     | Q9H6E5           | 3                    | 4              | 5.6                   | 874    | 93847  | 6.2 | Speckle targeted PIP5K1A-regulated poly(A) polymerase                                                                                                |
| 3930                     | Q12873           | 3                    | 4              | 5.7                   | 2000   | 226590 | 7.3 | Chromodomain-helicase-DNA-binding protein 3                                                                                                          |
| 3930                     | E9PG89           | 3                    | 4              | 5.5                   | 2059   | 233035 | 6.2 | Uncharacterized protein                                                                                                                              |
| 3931                     | Q15003           | 3                    | 5              | 5.5                   | 741    | 82563  | 5.1 | Condensin complex subunit 2                                                                                                                          |
| 3932                     | Q9UBB6           | 3                    | 4              | 5.5                   | 729    | 78864  | 5.5 | Neurochondrin                                                                                                                                        |
| 3932                     | Q9UBB6-3         | 3                    | 4              | 5.5                   | 731    | 79158  | 5.6 | Isoform 3 of Neurochondrin                                                                                                                           |
| 3933                     | Q9UNN5-2         | 3                    | 8              | 7                     | 498    | 56934  | 5.1 | Isoform Short of FAS-associated factor 1                                                                                                             |
| 3933                     | A8K9X5           | 3                    | 8              | 5.4                   | 650    | 73920  | 4.9 | cDNA FLJ76472, highly similar to sapiens Fas (TNFRSF6) associated factor 1 (FAF1), transcript variant 1, mRNA                                        |
| 3933                     | Q9UNN5           | 3                    | 8              | 5.4                   | 650    | 73954  | 4.9 | FAS-associated factor 1                                                                                                                              |
| 3934                     | E5RGH0           | 3                    | 5              | 50.8                  | 61     | 7252   | 4.6 | Uncharacterized protein                                                                                                                              |
| 3934                     | E9PN20           | 3                    | 5              | 36.5                  | 85     | 9937   | 4.9 | Uncharacterized protein                                                                                                                              |
| 3934                     | B4E159           | 3                    | 5              | 23.5                  | 132    | 15651  | 7.4 | cDNA FLJ57767, moderately similar to Zinc finger protein 141                                                                                         |
| 3934                     | C9JRN4           | 3                    | 5              | 6.4                   | 481    | 55703  | 9.2 | Uncharacterized protein                                                                                                                              |
| 3934                     | Q8TB69           | 3                    | 5              | 5.7                   | 540    | 63020  | 9.4 | Zinc finger protein 519                                                                                                                              |
| 3934                     | B4DXR9           | 3                    | 5              | 5.3                   | 585    | 67840  | 9   | Zinc finger protein 732                                                                                                                              |
| 3934                     | Q7Z3J0           | 3                    | 5              | 4.8                   | 648    | 74302  | 9.1 | Putative uncharacterized protein DKFZp313E1411                                                                                                       |
| 3935                     | Q92888-2         | 3                    | 4              | 5.7                   | 879    | 98768  | 5.6 | Isoform 2 of Rho guanine nucleotide exchange factor 1                                                                                                |
| 3935                     | Q92888           | 3                    | 4              | 5.5                   | 912    | 102435 | 5.7 | Rho guanine nucleotide exchange factor 1                                                                                                             |
| 3935                     | Q6NX52           | 3                    | 4              | 5.3                   | 948    | 105854 | 6.5 | ARHGEF1 protein                                                                                                                                      |
| 3936                     | Q8N1G2           | 3                    | 3              | 5.3                   | 835    | 95321  | 7   | Cap-specific mRNA (nucleoside-2'-O-)-methyltransferase 1                                                                                             |
| 3937                     | Q9NV70           | 3                    | 5              | 5.3                   | 894    | 101982 | 6.6 | Exocyst complex component 1                                                                                                                          |
| 3937                     | Q9NV70-2         | 3                    | 5              | 5.3                   | 879    | 100283 | 6.6 | Isoform 2 of Exocyst complex component 1                                                                                                             |
| 3938                     | Q96RU3-4         | 3                    | 6              | 5.8                   | 551    | 64056  | 5.2 | Isoform 4 of Formin-binding protein 1                                                                                                                |
| 3938                     | B7ZL14           | 3                    | 6              | 5.8                   | 551    | 64071  | 5.2 | FNBP1 protein                                                                                                                                        |
| 3938                     | Q5QP69           | 3                    | 6              | 5.6                   | 572    | 65815  | 6.1 | Formin binding protein 1 (Fragment)                                                                                                                  |
| 3938                     | Q96RU3-3         | 3                    | 6              | 5.4                   | 592    | 68883  | 5.8 | Isoform 3 of Formin-binding protein 1                                                                                                                |

Table S1. Proteins identified in the OVCAR-3 tumor supernatant by two or more unique peptides.

| Protein or Protein Group | Accession Number | Unique Peptide Count | Spectrum Count | Sequence Coverage (%) | Length | MolWt  | pI  | Descriptive Name                                                                                                                                                                 |
|--------------------------|------------------|----------------------|----------------|-----------------------|--------|--------|-----|----------------------------------------------------------------------------------------------------------------------------------------------------------------------------------|
| 3938                     | E9PCQ4           | 3                    | 6              | 5.3                   | 608    | 70324  | 5.7 | Uncharacterized protein                                                                                                                                                          |
| 3938                     | B7ZL13           | 3                    | 6              | 5.3                   | 607    | 70199  | 5.7 | FNBP1 protein                                                                                                                                                                    |
| 3938                     | B7ZL12           | 3                    | 6              | 5.2                   | 612    | 70752  | 5.7 | FNBP1 protein                                                                                                                                                                    |
| 3938                     | UPI0001AE6E3F    | 3                    | 6              | 5.2                   | 615    | 71089  | 5.8 | Formin-binding protein 1 (Formin-binding protein 17) (hFBP17).                                                                                                                   |
| 3938                     | UPI0001AE6E3D    | 3                    | 6              | 5.2                   | 612    | 70861  | 5.7 | Formin-binding protein 1 (Formin-binding protein 17) (hFBP17).                                                                                                                   |
| 3938                     | Q96RU3-2         | 3                    | 6              | 5.2                   | 616    | 71184  | 5.8 | Isoform 2 of Formin-binding protein 1                                                                                                                                            |
| 3938                     | Q96RU3           | 3                    | 6              | 5.2                   | 617    | 71307  | 5.7 | Formin-binding protein 1                                                                                                                                                         |
| 3939                     | Q6UWE0           | 3                    | 7              | 5.1                   | 723    | 83594  | 5.9 | E3 ubiquitin-protein ligase LRSAM1                                                                                                                                               |
| 3940                     | UPI000173A297    | 3                    | 10             | 14                    | 328    | 35880  | 9.7 | UPI000173A297 UniRef100 entry                                                                                                                                                    |
| 3940                     | A0FGR8-5         | 3                    | 10             | 14                    | 328    | 35846  | 9.7 | Isoform 5 of Extended synaptotagmin-2                                                                                                                                            |
| 3940                     | UPI000173A296    | 3                    | 10             | 5.2                   | 884    | 98010  | 8.6 | F-box/LRR-repeat protein 18 (F-box and leucine-rich repeat protein 18).                                                                                                          |
| 3940                     | A0FGR8-2         | 3                    | 10             | 5.2                   | 893    | 98902  | 8.7 | Isoform 2 of Extended synaptotagmin-2                                                                                                                                            |
| 3940                     | A0FGR8           | 3                    | 10             | 5                     | 921    | 102357 | 9.3 | Extended synaptotagmin-2                                                                                                                                                         |
| 3940                     | UPI0001AE715A    | 3                    | 10             | 5                     | 921    | 102372 | 9.3 | UPI0001AE715A UniRef100 entry                                                                                                                                                    |
| 3940                     | A0FGR8-6         | 3                    | 10             | 4.9                   | 942    | 104708 | 9.3 | Isoform 6 of Extended synaptotagmin-2                                                                                                                                            |
| 3941                     | UPI0001B796D1    | 3                    | 3              | 11.5                  | 425    | 48034  | 8.6 | UPI0001B796D1 UniRef100 entry                                                                                                                                                    |
| 3941                     | A8K5B6           | 3                    | 3              | 4.9                   | 1009   | 113937 | 8.6 | cDNA FLJ76830, highly similar to sapiens SWI/SNF related, matrix associated, actin dependent regulator of chromatin, subfamily a, member 3 (SMARCA3), transcript variant 1, mRNA |
| 3941                     | Q59GQ7           | 3                    | 3              | 4.9                   | 992    | 111966 | 8.7 | SWI/SNF-related matrix-associated actin-dependent regulator of chromatin a3 variant (Fragment)                                                                                   |
| 3941                     | Q14527           | 3                    | 3              | 4.9                   | 1009   | 113928 | 8.6 | Helicase-like transcription factor                                                                                                                                               |
| 3942                     | E7EUZ3           | 3                    | 9              | 4.9                   | 918    | 101679 | 4.7 | Uncharacterized protein                                                                                                                                                          |
| 3942                     | Q14966           | 3                    | 9              | 2.3                   | 1978   | 220623 | 6.4 | Zinc finger protein 638                                                                                                                                                          |
| 3943                     | C9JH23           | 3                    | 3              | 4.5                   | 740    | 82176  | 9.8 | Uncharacterized protein                                                                                                                                                          |
| 3943                     | Q14684-2         | 3                    | 3              | 4.5                   | 740    | 82176  | 9.8 | Isoform 2 of Ribosomal RNA processing protein 1 log B                                                                                                                            |
| 3943                     | Q14684           | 3                    | 3              | 4.4                   | 758    | 84428  | 9.8 | Ribosomal RNA processing protein 1 log B                                                                                                                                         |
| 3944                     | B7Z6Y7           | 3                    | 3              | 4.8                   | 924    | 104545 | 7.1 | cDNA FLJ53412, highly similar to DNA-directed RNA polymerase I                                                                                                                   |
| 3944                     | Q2TAM4           | 3                    | 3              | 4.6                   | 952    | 107812 | 7.7 | 135 kDa polypeptide (EC 2.7.7.6)                                                                                                                                                 |
| 3944                     | E9PB89           | 3                    | 3              | 4.6                   | 952    | 107858 | 7.6 | DNA-directed RNA polymerase                                                                                                                                                      |
| 3944                     | B7Z1VW6          | 3                    | 3              | 4.4                   | 996    | 112852 | 7.5 | Uncharacterized protein                                                                                                                                                          |
| 3944                     | Q9H9Y6-2         | 3                    | 3              | 4.1                   | 1079   | 121988 | 7.6 | DNA-directed RNA polymerase                                                                                                                                                      |
| 3944                     | Q9H9Y6           | 3                    | 3              | 3.9                   | 1135   | 128229 | 7.8 | Isoform 2 of DNA-directed RNA polymerase 1 subunit RPA2                                                                                                                          |
| 3944                     | B7Z823           | 3                    | 3              | 3.8                   | 1173   | 132168 | 8   | DNA-directed RNA polymerase                                                                                                                                                      |
| 3945                     | Q13751           | 3                    | 5              | 4.4                   | 1172   | 129572 | 7.2 | Laminin subunit beta-3                                                                                                                                                           |
| 3946                     | A2RU29           | 3                    | 4              | 4.3                   | 938    | 106998 | 5.6 | MORC3 protein                                                                                                                                                                    |
| 3946                     | Q4VBZ9           | 3                    | 4              | 4.3                   | 939    | 107041 | 5.6 | MORC family CW-type zinc finger 3                                                                                                                                                |
| 3946                     | Q14149           | 3                    | 4              | 4.3                   | 939    | 107113 | 5.6 | MORC family CW-type zinc finger protein 3                                                                                                                                        |
| 3946                     | E9PGS1           | 3                    | 4              | 4.3                   | 940    | 107241 | 5.6 | Uncharacterized protein                                                                                                                                                          |
| 3947                     | A8KAQ3           | 3                    | 3              | 4.3                   | 831    | 92037  | 5.8 | cDNA FLJ76489, highly similar to sapiens sortilin 1 (SORT1), mRNA                                                                                                                |
| 3947                     | Q99523           | 3                    | 3              | 4.3                   | 831    | 92068  | 5.8 | Sortilin                                                                                                                                                                         |
| 3948                     | Q53TB6           | 3                    | 3              | 9.9                   | 435    | 48454  | 4.7 | Putative uncharacterized protein MDA5 (Fragment)                                                                                                                                 |
| 3948                     | A8KA76           | 3                    | 3              | 4.2                   | 1025   | 116630 | 5.5 | cDNA FLJ78660, highly similar to sapiens interferon induced with helicase C domain 1 (IFIH1), mRNA                                                                               |
| 3948                     | Q9BYX4           | 3                    | 3              | 4.2                   | 1025   | 116689 | 5.5 | Interferon-induced helicase C domain-containing protein 1                                                                                                                        |
| 3949                     | B4DKV5           | 3                    | 3              | 5.3                   | 718    | 81460  | 5.4 | cDNA FLJ55614                                                                                                                                                                    |
| 3949                     | UPI000013D26F    | 3                    | 3              | 4.3                   | 891    | 101065 | 5.4 | UPI000013D26F UniRef100 entry                                                                                                                                                    |
| 3949                     | Q96EK7           | 3                    | 3              | 4.2                   | 910    | 103783 | 5.7 | Constitutive coactivator of peroxisome proliferator-activated receptor gamma                                                                                                     |
| 3949                     | B4DG54           | 3                    | 3              | 4.1                   | 922    | 105248 | 5.8 | cDNA FLJ56635                                                                                                                                                                    |
| 3949                     | B4DSS4           | 3                    | 3              | 4.1                   | 933    | 106116 | 5.9 | cDNA FLJ56631                                                                                                                                                                    |
| 3950                     | O75170-6         | 3                    | 6              | 4.3                   | 905    | 98126  | 4.9 | Isoform 6 of Serine/threonine-protein phosphatase 6 regulatory subunit 2                                                                                                         |
| 3950                     | O75170-4         | 3                    | 6              | 4.2                   | 932    | 101246 | 4.9 | Isoform 4 of Serine/threonine-protein phosphatase 6 regulatory subunit 2                                                                                                         |
| 3950                     | O75170-3         | 3                    | 6              | 4.2                   | 933    | 101402 | 4.9 | Isoform 3 of Serine/threonine-protein phosphatase 6 regulatory subunit 2                                                                                                         |
| 3950                     | O75170-2         | 3                    | 6              | 4.2                   | 927    | 101007 | 4.9 | Isoform 2 of Serine/threonine-protein phosphatase 6 regulatory subunit 2                                                                                                         |
| 3950                     | O75170-5         | 3                    | 6              | 4.1                   | 959    | 104235 | 4.9 | Isoform 5 of Serine/threonine-protein phosphatase 6 regulatory subunit 2                                                                                                         |
| 3950                     | O75170           | 3                    | 6              | 4                     | 966    | 104942 | 4.9 | Serine/threonine-protein phosphatase 6 regulatory subunit 2                                                                                                                      |
| 3951                     | Q6P2E9           | 3                    | 9              | 3.9                   | 1401   | 151661 | 5.9 | Enhancer of mRNA-decapping protein 4                                                                                                                                             |
| 3952                     | B4DDL3           | 3                    | 3              | 3.8                   | 999    | 113963 | 6   | cDNA FLJ55430, highly similar to Serologically defined colon cancer antigen 1 (Fragment)                                                                                         |
| 3952                     | B4E3F3           | 3                    | 3              | 3.6                   | 1055   | 120776 | 6.5 | cDNA FLJ61574, highly similar to Serologically defined colon cancer antigen 1                                                                                                    |
| 3952                     | UPI00001AA2F0    | 3                    | 3              | 3.5                   | 1076   | 122970 | 6.3 | serologically defined colon cancer antigen 1                                                                                                                                     |
| 3952                     | Q60524           | 3                    | 3              | 3.5                   | 1076   | 122954 | 6.3 | Serologically defined colon cancer antigen 1                                                                                                                                     |
| 3953                     | E9PBL8           | 3                    | 3              | 3.7                   | 940    | 104787 | 7.2 | Uncharacterized protein                                                                                                                                                          |
| 3953                     | Q4GOL8           | 3                    | 3              | 3.7                   | 940    | 104774 | 7.2 | COG1 protein                                                                                                                                                                     |
| 3953                     | Q8WVW3           | 3                    | 3              | 3.6                   | 980    | 108978 | 7.3 | Conserved oligomeric Golgi complex subunit 1                                                                                                                                     |
| 3954                     | Q9P0U0           | 3                    | 3              | 6.2                   | 533    | 58974  | 4.8 | PC326 protein                                                                                                                                                                    |
| 3954                     | Q58WV2-2         | 3                    | 3              | 3.8                   | 880    | 98423  | 5.2 | Isoform 2 of DDB1- and CUL4-associated factor 6                                                                                                                                  |
| 3954                     | Q58WV2           | 3                    | 3              | 3.8                   | 860    | 96292  | 5.3 | DDB1- and CUL4-associated factor 6                                                                                                                                               |
| 3954                     | B4DNB8           | 3                    | 3              | 3.6                   | 920    | 103070 | 5.4 | cDNA FLJ58595, highly similar to sapiens IQ motif and WD repeats 1 (IQWD1), transcript variant 1, mRNA                                                                           |
| 3954                     | Q58WV2-3         | 3                    | 3              | 3.5                   | 951    | 106542 | 5.4 | Isoform 3 of DDB1- and CUL4-associated factor 6                                                                                                                                  |
| 3955                     | Q9UIQ6-2         | 3                    | 4              | 3.6                   | 1011   | 115636 | 5.7 | Isoform 2 of Leucyl-cystinyl aminopeptidase                                                                                                                                      |
| 3955                     | B2RAK1           | 3                    | 4              | 3.5                   | 1025   | 117345 | 5.7 | cDNA, FLJ94965, highly similar to sapiens leucyl/cystinyl aminopeptidase (LNPEP), mRNA                                                                                           |
| 3955                     | Q9UIQ6           | 3                    | 4              | 3.5                   | 1025   | 117349 | 5.7 | Leucyl-cystinyl aminopeptidase                                                                                                                                                   |
| 3956                     | E7ESU4           | 3                    | 7              | 3.5                   | 953    | 107297 | 7   | Uncharacterized protein                                                                                                                                                          |
| 3956                     | UPI0001929506    | 3                    | 7              | 3.5                   | 953    | 107271 | 7   | N-acetyltransferase 10 isoform b                                                                                                                                                 |
| 3956                     | Q9HOA0           | 3                    | 7              | 3.2                   | 1025   | 115730 | 8.3 | N-acetyltransferase 10                                                                                                                                                           |
| 3957                     | Q01804           | 3                    | 3              | 3.2                   | 1113   | 123916 | 6.7 | OTU domain-containing protein 4                                                                                                                                                  |
| 3957                     | UPI0000E825C1    | 3                    | 3              | 3.2                   | 1114   | 124045 | 6.7 | UPI0000E825C1 UniRef100 entry                                                                                                                                                    |
| 3958                     | A8K6X9           | 3                    | 3              | 3.1                   | 1173   | 133530 | 6.8 | cDNA FLJ76427, highly similar to sapiens SH2 domain binding protein 1 (tetratricopeptide repeat containing) (SH2BP1), mRNA                                                       |
| 3958                     | Q6PD62           | 3                    | 3              | 3.1                   | 1173   | 133502 | 6.8 | RNA polymerase-associated protein CTR9 log                                                                                                                                       |
| 3959                     | Q9ULK4-5         | 3                    | 4              | 3.2                   | 1364   | 156082 | 7.4 | Isoform 5 of Mediator of RNA polymerase II transcription subunit 23                                                                                                              |
| 3959                     | Q9ULK4-3         | 3                    | 4              | 3.2                   | 1365   | 156193 | 7.4 | Isoform 3 of Mediator of RNA polymerase II transcription subunit 23                                                                                                              |
| 3959                     | E7EX31           | 3                    | 4              | 3.1                   | 1374   | 157114 | 7.4 | Uncharacterized protein                                                                                                                                                          |
| 3959                     | Q9ULK4           | 3                    | 4              | 3.1                   | 1368   | 156473 | 7.4 | Mediator of RNA polymerase II transcription subunit 23                                                                                                                           |
| 3959                     | Q5JWT2           | 3                    | 4              | 3.1                   | 1374   | 157113 | 7.5 | Cofactor required for Sp1 transcriptional activation, subunit 3, 130kDa                                                                                                          |
| 3960                     | Q24JQ7           | 3                    | 3              | 3                     | 1006   | 109037 | 8.7 | ATXN2 protein                                                                                                                                                                    |
| 3960                     | Q99700-2         | 3                    | 3              | 3                     | 995    | 106048 | 9.7 | Isoform 2 of Ataxin-2                                                                                                                                                            |

Table S1. Proteins identified in the OVCAR-3 tumor supernatant by two or more unique peptides.

| Protein or Protein Group | Accession Number | Unique Peptide Count | Spectrum Count | Sequence Coverage (%) | Length | MolWt   | pI   | Descriptive Name                                                                                                                            |
|--------------------------|------------------|----------------------|----------------|-----------------------|--------|---------|------|---------------------------------------------------------------------------------------------------------------------------------------------|
| 3960                     | UPI0000E5996A    | 3                    | 3              | 2.9                   | 1050   | 113882  | 8.8  | Ataxin-2 (Spinocerebellar ataxia type 2 protein) (Trinucleotide repeat-containing gene 13 protein).                                         |
| 3960                     | Q2MZR5           | 3                    | 3              | 2.7                   | 1127   | 122181  | 8.7  | ATXN2 protein (Fragment)                                                                                                                    |
| 3960                     | Q99700           | 3                    | 3              | 2.3                   | 1313   | 140283  | 9.6  | Ataxin-2                                                                                                                                    |
| 3961                     | P23468           | 3                    | 3              | 2.9                   | 1912   | 214758  | 6.6  | Receptor-type tyrosine-protein phosphatase delta                                                                                            |
| 3961                     | UPI0000EE416B    | 3                    | 3              | 2.9                   | 1890   | 212158  | 6.7  | Receptor-type tyrosine-protein phosphatase delta precursor (EC 3.1.3.48) (Protein-tyrosine phosphatase delta) (R-PTP-delta).                |
| 3961                     | Q2HXI4           | 3                    | 3              | 2.9                   | 1912   | 214784  | 6.6  | Protein tyrosine phosphatase receptor type D                                                                                                |
| 3961                     | P23468-2         | 3                    | 3              | 2.9                   | 1890   | 212131  | 6.7  | Isoform 2 of Receptor-type tyrosine-protein phosphatase delta cDNA FLJ61556, highly similar to Poly (ADP-ribose) polymerase 4 (EC 2.4.2.30) |
| 3962                     | B4E2S2           | 3                    | 3              | 2.8                   | 1005   | 112792  | 5.6  | Poly [ADP-ribose] polymerase 4                                                                                                              |
| 3962                     | Q9UKK3           | 3                    | 3              | 1.6                   | 1724   | 192593  | 5.7  | Isoform 3 of Crumbs log 2                                                                                                                   |
| 3963                     | Q5LJ48-3         | 3                    | 3              | 3.8                   | 953    | 99830   | 6.2  | Isoform 3 of Crumbs log 2                                                                                                                   |
| 3963                     | Q5LJ48-2         | 3                    | 3              | 3.1                   | 1176   | 123213  | 5.6  | Isoform 2 of Crumbs log 2                                                                                                                   |
| 3963                     | Q5LJ48           | 3                    | 3              | 2.8                   | 1285   | 134265  | 5.6  | Crumbs log 2                                                                                                                                |
| 3964                     | Q9UPT8           | 3                    | 6              | 2.8                   | 1303   | 140256  | 6.3  | Zinc finger CCCH domain-containing protein 4                                                                                                |
| 3965                     | Q9HAU0-5         | 3                    | 6              | 3.3                   | 1060   | 121272  | 8.1  | Isoform 5 of Pleckstrin logy domain-containing family A member 5                                                                            |
| 3965                     | Q9HAU0           | 3                    | 6              | 3.1                   | 1116   | 127464  | 7.5  | Pleckstrin logy domain-containing family A member 5                                                                                         |
| 3965                     | Q9HAU0-4         | 3                    | 6              | 3                     | 1179   | 134593  | 7.3  | Isoform 4 of Pleckstrin logy domain-containing family A member 5                                                                            |
| 3965                     | Q9HAU0-2         | 3                    | 6              | 3                     | 1174   | 134323  | 7.6  | Isoform 2 of Pleckstrin logy domain-containing family A member 5                                                                            |
| 3965                     | E9PHQ3           | 3                    | 6              | 2.7                   | 1277   | 146394  | 7.7  | Uncharacterized protein                                                                                                                     |
| 3966                     | P16885           | 3                    | 3              | 2.7                   | 1265   | 147870  | 6.6  | 1-phosphatidylinositol-4,5-bisphosphate phosphodiesterase gamma-2                                                                           |
| 3967                     | O95104-2         | 3                    | 11             | 2.7                   | 1125   | 123643  | 9.6  | Isoform 2 of Splicing factor, arginine/serine-rich 15                                                                                       |
| 3967                     | C9JD39           | 3                    | 11             | 2.7                   | 1125   | 123645  | 9.6  | Uncharacterized protein                                                                                                                     |
| 3967                     | C9J1W7           | 3                    | 11             | 2.6                   | 1147   | 125871  | 9.6  | Uncharacterized protein                                                                                                                     |
| 3967                     | Q0P607           | 3                    | 11             | 2.6                   | 1146   | 125740  | 9.6  | Splicing factor, arginine/serine-rich 15                                                                                                    |
| 3967                     | O95104           | 3                    | 11             | 2.6                   | 1147   | 125869  | 9.6  | Splicing factor, arginine/serine-rich 15                                                                                                    |
| 3968                     | A6H8X9           | 3                    | 5              | 2.5                   | 1460   | 161437  | 7    | Centrosomal protein 170kDa                                                                                                                  |
| 3968                     | Q5SW79-3         | 3                    | 5              | 2.5                   | 1486   | 164538  | 7.2  | Isoform 3 of Centrosomal protein of 170 kDa                                                                                                 |
| 3968                     | Q5SW79-2         | 3                    | 5              | 2.5                   | 1480   | 161407  | 7    | Isoform 2 of Centrosomal protein of 170 kDa                                                                                                 |
| 3968                     | B2RTS4           | 3                    | 5              | 2.5                   | 1486   | 164568  | 7.2  | Centrosomal protein 170kDa                                                                                                                  |
| 3968                     | Q5SW79           | 3                    | 5              | 2.3                   | 1584   | 175292  | 7.1  | Centrosomal protein of 170 kDa                                                                                                              |
| 3968                     | E9PEY0           | 3                    | 5              | 2.3                   | 1624   | 179628  | 7.2  | Uncharacterized protein                                                                                                                     |
| 3969                     | Q59EE6           | 3                    | 7              | 2.4                   | 1700   | 181811  | 5    | Latent transforming growth factor beta binding protein 2 variant (Fragment)                                                                 |
| 3969                     | Q14767           | 3                    | 7              | 2.3                   | 1821   | 195051  | 5.2  | Latent-transforming growth factor beta-binding protein 2                                                                                    |
| 3969                     | Q6AZ94           | 3                    | 7              | 2.3                   | 1821   | 195037  | 5.2  | Latent transforming growth factor beta binding protein 2                                                                                    |
| 3970                     | Q59H44           | 3                    | 5              | 2.6                   | 1340   | 154596  | 7    | Lymphocyte antigen 75 variant (Fragment)                                                                                                    |
| 3970                     | Q60449           | 3                    | 5              | 2                     | 1722   | 198310  | 6.7  | Lymphocyte antigen 75                                                                                                                       |
| 3970                     | Q60449-3         | 3                    | 5              | 1.9                   | 1817   | 209437  | 6.2  | Isoform 3 of Lymphocyte antigen 75                                                                                                          |
| 3970                     | Q60449-2         | 3                    | 5              | 1.9                   | 1873   | 215779  | 6.2  | Isoform 2 of Lymphocyte antigen 75                                                                                                          |
| 3971                     | UPI0001662CC8    | 3                    | 3              | 1.7                   | 2934   | 336125  | 6.5  | PREDICTED: serine-protein kinase ATM-like, partial                                                                                          |
| 3971                     | Q13315           | 3                    | 3              | 1.6                   | 3056   | 350714  | 6.8  | Serine-protein kinase ATM                                                                                                                   |
| 3972                     | P98164           | 3                    | 4              | 1.1                   | 4655   | 521961  | 5.1  | Low-density lipoprotein receptor-related protein 2                                                                                          |
| 3972                     | Q7Z5C1           | 3                    | 4              | 1.1                   | 4655   | 521992  | 5.1  | Glycoprotein receptor gp330/megalin                                                                                                         |
| 3972                     | Q7Z5C0           | 3                    | 4              | 1.1                   | 4655   | 521935  | 5.1  | Glycoprotein receptor gp330/megalin                                                                                                         |
| 3973                     | Q12830-4         | 3                    | 5              | 1.2                   | 2903   | 322217  | 6.4  | Isoform 4 of Nucleosome-remodeling factor subunit BPTF                                                                                      |
| 3973                     | Q12830-2         | 3                    | 5              | 1.2                   | 2920   | 325123  | 7.1  | Isoform 2 of Nucleosome-remodeling factor subunit BPTF                                                                                      |
| 3973                     | Q12830           | 3                    | 5              | 1.1                   | 3046   | 338262  | 6.5  | Nucleosome-remodeling factor subunit BPTF                                                                                                   |
| 3974                     | Q7RTM4           | 3                    | 5              | 0.6                   | 8407   | 966361  | 5.6  | Spectrin-like protein of the nuclear envelope and Golgi                                                                                     |
| 3974                     | E7ENN3           | 3                    | 5              | 0.6                   | 8409   | 966670  | 5.6  | Uncharacterized protein                                                                                                                     |
| 3974                     | B7ZBC3           | 3                    | 5              | 0.5                   | 8797   | 1011054 | 5.5  | Spectrin repeat containing, nuclear envelope 1                                                                                              |
| 3974                     | Q8NF91-4         | 3                    | 5              | 0.5                   | 8749   | 1005204 | 5.5  | Isoform 4 of Nesprin-1                                                                                                                      |
| 3974                     | Q8NF91           | 3                    | 5              | 0.5                   | 8797   | 1011050 | 5.5  | Nesprin-1                                                                                                                                   |
| 3974                     | Q5JV23           | 3                    | 5              | 0.5                   | 8749   | 1005208 | 5.5  | Spectrin repeat containing, nuclear envelope 1                                                                                              |
| 3974                     | E9PEL9           | 3                    | 5              | 0.5                   | 8749   | 1005226 | 5.5  | Uncharacterized protein                                                                                                                     |
| 3974                     | E7EQI5           | 3                    | 5              | 0.5                   | 8797   | 1011072 | 5.5  | Uncharacterized protein                                                                                                                     |
| 3975                     | E9PAM3           | 2                    | 3              | 85.5                  | 62     | 6850    | 4.3  | Uncharacterized protein                                                                                                                     |
| 3975                     | Q9Y4Y9           | 2                    | 3              | 58.2                  | 91     | 9937    | 4.5  | U6 snRNA-associated Sm-like protein LSM5 U6 snRNA-associated Sm-like protein LSM5                                                           |
| 3976                     | Q71U36           | 2                    | 46             | 77.2                  | 451    | 50136   | 5.1  | Tubulin alpha-1A chain Tubulin alpha-1A chain                                                                                               |
| 3977                     | P24844           | 2                    | 3              | 55.8                  | 172    | 19827   | 4.9  | Myosin regulatory light polypeptide 9                                                                                                       |
| 3977                     | Q9CQ19           | 2                    | 3              | 55.8                  | 172    | 19854   | 4.9  | Myosin regulatory light polypeptide 9                                                                                                       |
| 3977                     | Q6IBG1           | 2                    | 3              | 55.8                  | 172    | 19849   | 5.1  | MYL9 protein                                                                                                                                |
| 3978                     | UPI000198C9D7    | 2                    | 7              | 56.3                  | 151    | 16928   | 7.7  | UPI000198C9D7 UniRef100 entry                                                                                                               |
| 3978                     | C9J8K2           | 2                    | 7              | 53.1                  | 160    | 18000   | 8.8  | Ubiquitin carrier protein                                                                                                                   |
| 3978                     | P52482           | 2                    | 7              | 44                    | 193    | 21333   | 8.5  | Ubiquitin-conjugating enzyme E2 E1                                                                                                          |
| 3978                     | P51965           | 2                    | 7              | 44                    | 193    | 21404   | 8.5  | Ubiquitin-conjugating enzyme E2 E1                                                                                                          |
| 3979                     | D3YU44           | 2                    | 4              | 52.9                  | 68     | 7295    | 9.5  | Uncharacterized protein                                                                                                                     |
| 3979                     | UPI000012B8BE    | 2                    | 4              | 52.9                  | 68     | 7251    | 9.1  | Guanine nucleotide-binding protein G(I)/G(S)/G(O) gamma-5-like subunit.                                                                     |
| 3979                     | P63218           | 2                    | 4              | 52.9                  | 68     | 7318    | 9.9  | Guanine nucleotide-binding protein G(I)/G(S)/G(O) subunit gamma-5                                                                           |
| 3980                     | Q16777           | 2                    | 98             | 49.6                  | 129    | 13988   | 10.9 | Histone H2A type 2-C Histone H2A type 2-C                                                                                                   |
| 3980                     | Q6F113           | 2                    | 98             | 49.2                  | 130    | 14095   | 10.9 | Histone H2A type 2-A Histone H2A type 2-A                                                                                                   |
| 3980                     | UPI0001E6B57B    | 2                    | 98             | 22                    | 291    | 32213   | 6.8  | PREDICTED: src substrate cortactin                                                                                                          |
| 3981                     | P16104           | 2                    | 11             | 47.6                  | 143    | 15145   | 10.7 | Histone H2A.x                                                                                                                               |
| 3981                     | P27661           | 2                    | 11             | 47.6                  | 143    | 15143   | 10.7 | Histone H2A.x                                                                                                                               |
| 3982                     | P59768           | 2                    | 4              | 42.3                  | 71     | 7850    | 8    | Guanine nucleotide-binding protein G(I)/G(S)/G(O) subunit gamma-2                                                                           |
| 3983                     | P08134           | 2                    | 21             | 49.7                  | 193    | 22006   | 6.6  | Rho-related GTP-binding protein RhoC Rho-related GTP-binding protein RhoC                                                                   |
| 3983                     | E9PN11           | 2                    | 21             | 41.9                  | 229    | 25485   | 5.6  | Uncharacterized protein                                                                                                                     |
| 3984                     | P60763           | 2                    | 4              | 40.1                  | 192    | 21379   | 8.2  | Ras-related C3 botulinum toxin substrate 3 Ras-related C3                                                                                   |
| 3985                     | Q13509           | 2                    | 2              | 39.6                  | 450    | 50433   | 4.9  | botulinum toxin substrate 3                                                                                                                 |
| 3985                     | Q9ERD7           | 2                    | 2              | 39.6                  | 450    | 50419   | 4.9  | Tubulin beta-3 chain                                                                                                                        |
| 3986                     | P31786           | 2                    | 10             | 39.1                  | 87     | 10000   | 8.8  | Tubulin beta-3 chain                                                                                                                        |
| 3986                     | Q3ULV8           | 2                    | 10             | 39.1                  | 87     | 9995    | 8.3  | Acyl-CoA-binding protein Acyl-CoA-binding protein                                                                                           |
| 3986                     | UPI0000F220C0    | 2                    | 10             | 33.7                  | 101    | 11548   | 8.2  | Putative uncharacterized protein                                                                                                            |
| 3986                     | Q4VWZ5           | 2                    | 10             | 25.2                  | 135    | 15229   | 9.1  | UPI0000F220C0 UniRef100 entry                                                                                                               |
| 3987                     | Q13951           | 2                    | 3              | 39                    | 182    | 21508   | 6.6  | Diazepam binding inhibitor, splice form 1b                                                                                                  |
| 3987                     | Q66HA7           | 2                    | 3              | 39                    | 182    | 21517   | 6.8  | Core-binding factor subunit beta                                                                                                            |
| 3988                     | P11908           | 2                    | 3              | 38.4                  | 318    | 34769   | 6.6  | Core-binding factor, beta subunit                                                                                                           |
| 3988                     | Q9CS42           | 2                    | 3              | 38.4                  | 318    | 34786   | 6.6  | Ribose-phosphate pyrophosphokinase 2                                                                                                        |
| 3988                     | P11908-2         | 2                    | 3              | 38                    | 321    | 35054   | 6.4  | Ribose-phosphate pyrophosphokinase 2                                                                                                        |
| 3989                     | UPI00004DC55A    | 2                    | 8              | 51.4                  | 109    | 12421   | 7.9  | Isoform 2 of Ribose-phosphate pyrophosphokinase 2                                                                                           |

Table S1. Proteins identified in the OVCAR-3 tumor supernatant by two or more unique peptides.

| Protein or Protein Group | Accession Number | Unique Peptide Count | Spectrum Count | Sequence Coverage (%) | Length | MolWt | pI   | Descriptive Name                                                                                                                                                                                         |
|--------------------------|------------------|----------------------|----------------|-----------------------|--------|-------|------|----------------------------------------------------------------------------------------------------------------------------------------------------------------------------------------------------------|
| 3989                     | P51668           | 2                    | 8              | 38.1                  | 147    | 16602 | 7.4  | Ubiquitin-conjugating enzyme E2 D1 Ubiquitin-conjugating enzyme E2 D1                                                                                                                                    |
| 3990                     | Q3TJ84           | 2                    | 11             | 35.5                  | 124    | 14776 | 4.1  | Putative uncharacterized protein                                                                                                                                                                         |
| 3990                     | Q9D6V8           | 2                    | 11             | 35.5                  | 124    | 14700 | 4.1  | Polyadenylate-binding protein-interacting protein 2                                                                                                                                                      |
| 3990                     | Q3U438           | 2                    | 11             | 35.5                  | 124    | 14749 | 4.1  | Putative uncharacterized protein                                                                                                                                                                         |
| 3990                     | Q9BPZ3           | 2                    | 11             | 34.6                  | 127    | 14984 | 4.1  | Polyadenylate-binding protein-interacting protein 2                                                                                                                                                      |
| 3991                     | Q78Y26-2         | 2                    | 10             | 53.7                  | 82     | 9355  | 4.7  | Isoform 2 of Short coiled-coil protein<br>Isoform 3 of Short coiled-coil protein Isoform 3 of Short coiled-coil protein                                                                                  |
| 3991                     | Q9UIL1-3         | 2                    | 10             | 36.4                  | 121    | 13857 | 4.8  | protein                                                                                                                                                                                                  |
| 3991                     | Q9UIL1-2         | 2                    | 10             | 36.1                  | 122    | 13929 | 4.8  | Isoform 2 of Short coiled-coil protein                                                                                                                                                                   |
| 3991                     | Q78Y26           | 2                    | 10             | 35.2                  | 125    | 14155 | 4.7  | Short coiled-coil protein                                                                                                                                                                                |
| 3991                     | UPI000199A558    | 2                    | 10             | 27.8                  | 158    | 17974 | 8.8  | short coiled-coil protein isoform 2                                                                                                                                                                      |
| 3991                     | Q9UIL1           | 2                    | 10             | 27.7                  | 159    | 18045 | 8.8  | Short coiled-coil protein                                                                                                                                                                                |
| 3992                     | Q9CX60           | 2                    | 2              | 34.3                  | 105    | 12138 | 4.3  | Protein LBH                                                                                                                                                                                              |
| 3992                     | Q5RD13           | 2                    | 2              | 34.3                  | 105    | 12218 | 4.3  | Protein LBH                                                                                                                                                                                              |
| 3992                     | Q53QV2           | 2                    | 2              | 34.3                  | 105    | 12217 | 4.4  | Protein LBH                                                                                                                                                                                              |
| 3992                     | B5MCP4           | 2                    | 2              | 32.4                  | 111    | 12585 | 4.4  | Uncharacterized protein                                                                                                                                                                                  |
| 3993                     | P63146           | 2                    | 6              | 32.2                  | 152    | 17312 | 5    | Ubiquitin-conjugating enzyme E2 B Ubiquitin-conjugating enzyme E2 B                                                                                                                                      |
| 3994                     | Q9BRV4           | 2                    | 16             | 33                    | 100    | 11310 | 6.8  | Vesicle-associated membrane protein 3 (Cellubrevin)                                                                                                                                                      |
| 3994                     | Q15836           | 2                    | 16             | 33                    | 100    | 11309 | 8.8  | Vesicle-associated membrane protein 3                                                                                                                                                                    |
| 3994                     | P63024           | 2                    | 16             | 32                    | 103    | 11480 | 8.5  | Vesicle-associated membrane protein 3                                                                                                                                                                    |
| 3995                     | C9J7M8           | 2                    | 2              | 31.7                  | 123    | 13172 | 8.8  | Uncharacterized protein                                                                                                                                                                                  |
| 3995                     | Q9EQH4-5         | 2                    | 2              | 17.6                  | 221    | 24361 | 8.6  | Isoform 5 of Transcription initiation factor TFIID subunit 8                                                                                                                                             |
| 3995                     | E9Q8H2           | 2                    | 2              | 17.6                  | 222    | 24467 | 8.2  | Uncharacterized protein                                                                                                                                                                                  |
| 3995                     | Q9EQH4-3         | 2                    | 2              | 14.7                  | 265    | 29196 | 5.8  | Isoform 3 of Transcription initiation factor TFIID subunit 8                                                                                                                                             |
| 3995                     | E9Q367           | 2                    | 2              | 14.7                  | 265    | 29243 | 5.5  | Uncharacterized protein                                                                                                                                                                                  |
| 3995                     | Q9EQH4           | 2                    | 2              | 12.7                  | 308    | 33988 | 6.4  | Transcription initiation factor TFIID subunit 8                                                                                                                                                          |
| 3995                     | Q7Z7C8           | 2                    | 2              | 12.6                  | 310    | 34262 | 6.4  | Transcription initiation factor TFIID subunit 8                                                                                                                                                          |
| 3995                     | Q7Z7C8-2         | 2                    | 2              | 12.5                  | 311    | 34436 | 6.2  | Isoform 2 of Transcription initiation factor TFIID subunit 8                                                                                                                                             |
| 3995                     | Q9EQH4-4         | 2                    | 2              | 12.1                  | 322    | 35440 | 6.3  | Isoform 4 of Transcription initiation factor TFIID subunit 8                                                                                                                                             |
| 3995                     | Q7Z7C8-4         | 2                    | 2              | 11.5                  | 338    | 37411 | 8.4  | Isoform 3 of Transcription initiation factor TFIID subunit 8                                                                                                                                             |
| 3996                     | Q9Y3L5           | 2                    | 9              | 31.1                  | 183    | 20745 | 4.9  | Ras-related protein Rap-2c Ras-related protein Rap-2c                                                                                                                                                    |
| 3997                     | A1L0U3           | 2                    | 70             | 30.8                  | 133    | 15030 | 11.1 | Histone H3 (Fragment)                                                                                                                                                                                    |
| 3997                     | Q71D13           | 2                    | 70             | 30.1                  | 136    | 15388 | 11.3 | Histone H3.2 Histone H3.2                                                                                                                                                                                |
| 3998                     | D2HCJ0           | 2                    | 5              | 30.6                  | 62     | 7763  | 7.2  | Putative uncharacterized protein (Fragment)                                                                                                                                                              |
| 3998                     | UPI00006075BD    | 2                    | 5              | 24.1                  | 79     | 9846  | 7.7  | PREDICTED: cyclin-dependent kinases regulatory subunit 2-like                                                                                                                                            |
| 3998                     | UPI0000604B9A    | 2                    | 5              | 24.1                  | 79     | 9917  | 9    | PREDICTED: cyclin-dependent kinases regulatory subunit 2-like                                                                                                                                            |
| 3998                     | P56390           | 2                    | 5              | 24.1                  | 79     | 9874  | 8.5  | Cyclin-dependent kinases regulatory subunit 2                                                                                                                                                            |
| 3998                     | P33552           | 2                    | 5              | 24.1                  | 79     | 9860  | 8.5  | Cyclin-dependent kinases regulatory subunit 2                                                                                                                                                            |
| 3999                     | Q9HB72           | 2                    | 4              | 30.3                  | 76     | 8468  | 10.2 | PNAS-106                                                                                                                                                                                                 |
| 3999                     | Q9Y5V0           | 2                    | 4              | 30.3                  | 76     | 8498  | 10   | Zinc finger protein 706 Zinc finger protein 706                                                                                                                                                          |
| 4000                     | C9JTN7           | 2                    | 4              | 29.5                  | 285    | 31625 | 8.3  | Uncharacterized protein                                                                                                                                                                                  |
| 4000                     | Q8C1I5           | 2                    | 4              | 29.5                  | 285    | 31581 | 8.3  | Tia1 protein                                                                                                                                                                                             |
| 4000                     | P31483-2         | 2                    | 4              | 22.4                  | 375    | 41801 | 7.8  | Isoform Short of Nucleolysin TIA-1 isoform p40                                                                                                                                                           |
| 4000                     | Q80ZV7           | 2                    | 4              | 22.3                  | 377    | 41893 | 8    | Tia1 protein                                                                                                                                                                                             |
| 4001                     | Q9WV98           | 2                    | 3              | 29.2                  | 89     | 10344 | 7.2  | Mitochondrial import inner membrane translocase subunit Tim9                                                                                                                                             |
| 4001                     | Q9Y5J7           | 2                    | 3              | 29.2                  | 89     | 10378 | 7.2  | Mitochondrial import inner membrane translocase subunit Tim9                                                                                                                                             |
| 4002                     | Q14907           | 2                    | 7              | 28.2                  | 124    | 13735 | 8.5  | Tax1-binding protein 3                                                                                                                                                                                   |
| 4002                     | UPI0000604485    | 2                    | 7              | 28.2                  | 124    | 13783 | 7.4  | PREDICTED: tax1-binding protein 3-like isoform 2                                                                                                                                                         |
| 4002                     | Q9DBG9           | 2                    | 7              | 28.2                  | 124    | 13723 | 8.5  | Tax1-binding protein 3                                                                                                                                                                                   |
| 4003                     | Q9NPA8           | 2                    | 6              | 25.7                  | 101    | 11529 | 9.3  | Enhancer of yellow 2 transcription factor log Enhancer of yellow 2 transcription factor log                                                                                                              |
| 4004                     | Q9QZV9           | 2                    | 5              | 25                    | 140    | 15847 | 5    | NTF2-related export protein 1                                                                                                                                                                            |
| 4004                     | Q9UKK6           | 2                    | 5              | 25                    | 140    | 15847 | 5    | NTF2-related export protein 1                                                                                                                                                                            |
| 4005                     | Q96DE5           | 2                    | 2              | 24.5                  | 110    | 11667 | 5    | Anaphase-promoting complex subunit 16 Anaphase-promoting complex subunit 16                                                                                                                              |
| 4006                     | D3Z4V3           | 2                    | 3              | 24.4                  | 90     | 10443 | 8.4  | Uncharacterized protein                                                                                                                                                                                  |
| 4006                     | Q9Y6I3-3         | 2                    | 3              | 4                     | 550    | 57504 | 4.9  | Isoform 3 of Epsin-1                                                                                                                                                                                     |
| 4006                     | Q9Y6I3           | 2                    | 3              | 4                     | 551    | 57575 | 4.9  | Epsin-1                                                                                                                                                                                                  |
| 4006                     | Q9Y6I3-2         | 2                    | 3              | 3.8                   | 576    | 60293 | 4.8  | Isoform 2 of Epsin-1                                                                                                                                                                                     |
| 4006                     | Q80VP1-2         | 2                    | 3              | 3.8                   | 576    | 60283 | 4.8  | Isoform 2 of Epsin-1                                                                                                                                                                                     |
| 4006                     | Q80VP1           | 2                    | 3              | 3.8                   | 575    | 60212 | 4.8  | Epsin-1                                                                                                                                                                                                  |
| 4007                     | B2R5J1           | 2                    | 4              | 23.9                  | 117    | 13918 | 8.8  | cDNA, FLJ92494, highly similar to sapiens GABA(A) receptor-associated protein (GABARAP), mRNA<br>Gamma-aminobutyric acid receptor-associated protein Gamma-aminobutyric acid receptor-associated protein |
| 4007                     | O95166           | 2                    | 4              | 23.9                  | 117    | 13918 | 8.8  | Gamma-aminobutyric acid receptor-associated protein                                                                                                                                                      |
| 4008                     | D6RCG4           | 2                    | 7              | 56.6                  | 76     | 8727  | 6.8  | Uncharacterized protein                                                                                                                                                                                  |
| 4008                     | Q96B02           | 2                    | 7              | 28.5                  | 151    | 17331 | 7.8  | Probable ubiquitin-conjugating enzyme E2 W                                                                                                                                                               |
| 4008                     | Q8VDW4           | 2                    | 7              | 28.5                  | 151    | 17345 | 7.8  | Probable ubiquitin-conjugating enzyme E2 W                                                                                                                                                               |
| 4008                     | Q3V321           | 2                    | 7              | 27.9                  | 154    | 17411 | 9    | Putative uncharacterized protein                                                                                                                                                                         |
| 4008                     | UPI0001E8F39A    | 2                    | 7              | 27.7                  | 155    | 17779 | 8.2  | UPI0001E8F39A UniRef100 entry                                                                                                                                                                            |
| 4008                     | Q1XBE0           | 2                    | 7              | 26.5                  | 162    | 18660 | 8.1  | Ubiquitin-conjugating enzyme 16                                                                                                                                                                          |
| 4008                     | C9JS56           | 2                    | 7              | 26.5                  | 162    | 18637 | 7.8  | Uncharacterized protein                                                                                                                                                                                  |
| 4008                     | B4DIV1           | 2                    | 7              | 23.9                  | 180    | 20689 | 9    | Ubiquitin-conjugating enzyme E2W (Putative), isoform CRA_a                                                                                                                                               |
| 4009                     | Q7Z422-2         | 2                    | 3              | 25                    | 132    | 14605 | 11.3 | Isoform 2 of UPF0485 protein C1orf144                                                                                                                                                                    |
| 4009                     | A2AA86           | 2                    | 3              | 25                    | 132    | 14634 | 11.5 | Novel protein (D4Etd22e)                                                                                                                                                                                 |
| 4009                     | Q7Z422-4         | 2                    | 3              | 24.8                  | 133    | 14761 | 11.4 | Isoform 4 of UPF0485 protein C1orf144                                                                                                                                                                    |
| 4009                     | Q6NXN1-2         | 2                    | 3              | 24.8                  | 133    | 14790 | 11.5 | Isoform 2 of UPF0485 protein C1orf144 log                                                                                                                                                                |
| 4009                     | Q7Z422-3         | 2                    | 3              | 24.6                  | 134    | 14744 | 5.7  | Isoform 3 of UPF0485 protein C1orf144                                                                                                                                                                    |
| 4009                     | A2AA85           | 2                    | 3              | 22.6                  | 146    | 16277 | 9.8  | Novel protein (D4Etd22e) (Fragment)                                                                                                                                                                      |
| 4009                     | C9K0U0           | 2                    | 3              | 21.9                  | 151    | 16910 | 9    | Uncharacterized protein                                                                                                                                                                                  |
| 4009                     | Q7Z422           | 2                    | 3              | 21.7                  | 152    | 16997 | 9    | UPF0485 protein C1orf144                                                                                                                                                                                 |
| 4009                     | Q6NXN1           | 2                    | 3              | 21.7                  | 152    | 16998 | 9    | UPF0485 protein C1orf144 log                                                                                                                                                                             |
| 4010                     | P62072           | 2                    | 6              | 22.2                  | 90     | 10333 | 6.3  | Mitochondrial import inner membrane translocase subunit Tim10                                                                                                                                            |
| 4011                     | Q9BV40           | 2                    | 2              | 22                    | 100    | 11438 | 7.4  | Mitochondrial import inner membrane translocase subunit Tim10                                                                                                                                            |
| 4011                     | O70404           | 2                    | 2              | 21.8                  | 101    | 11451 | 8.2  | Vesicle-associated membrane protein 8                                                                                                                                                                    |
| 4012                     | Q80Y14           | 2                    | 3              | 21.7                  | 152    | 16292 | 6.5  | Glutaredoxin-related protein 5, mitochondrial                                                                                                                                                            |
| 4012                     | Q86SX6           | 2                    | 3              | 21                    | 157    | 16628 | 6.8  | Glutaredoxin-related protein 5, mitochondrial                                                                                                                                                            |
| 4013                     | Q9DBW3           | 2                    | 3              | 21.8                  | 110    | 12731 | 8.5  | Protein GTLF3B                                                                                                                                                                                           |
| 4013                     | Q8N6N6           | 2                    | 3              | 21.2                  | 113    | 13032 | 8.6  | Protein GTLF3B                                                                                                                                                                                           |
| 4014                     | O35207           | 2                    | 8              | 20.2                  | 114    | 12354 | 9.4  | Cyclin-dependent kinase 2-associated protein 1                                                                                                                                                           |
| 4014                     | O14519           | 2                    | 8              | 20                    | 115    | 12365 | 9.4  | Cyclin-dependent kinase 2-associated protein 1                                                                                                                                                           |
| 4015                     | A0PJ13           | 2                    | 7              | 19.7                  | 203    | 23112 | 9.8  | Ppp1r10 protein (Fragment)                                                                                                                                                                               |
| 4015                     | Q58F28           | 2                    | 7              | 12.8                  | 312    | 34734 | 9.9  | PPP1R10 protein (Fragment)                                                                                                                                                                               |
| 4015                     | Q80W00-2         | 2                    | 7              | 4.6                   | 874    | 93052 | 9.2  | Isoform 2 of Serine/threonine-protein phosphatase 1 regulatory subunit 10                                                                                                                                |
| 4015                     | E9QPZ8           | 2                    | 7              | 4.6                   | 874    | 93025 | 9.2  | Uncharacterized protein                                                                                                                                                                                  |
| 4015                     | Q80W00           | 2                    | 7              | 4.5                   | 888    | 94372 | 9.2  | Serine/threonine-protein phosphatase 1 regulatory subunit 10                                                                                                                                             |
| 4015                     | Q96QC0           | 2                    | 7              | 4.3                   | 940    | 99058 | 9.2  | Serine/threonine-protein phosphatase 1 regulatory subunit 10                                                                                                                                             |
| 4016                     | B5BU61           | 2                    | 2              | 19.7                  | 482    | 55076 | 5.5  | Histone deacetylase                                                                                                                                                                                      |
| 4016                     | Q13547           | 2                    | 2              | 19.7                  | 482    | 55103 | 5.5  | Histone deacetylase 1                                                                                                                                                                                    |
| 4016                     | O09106           | 2                    | 2              | 19.7                  | 482    | 55075 | 5.5  | Histone deacetylase 1                                                                                                                                                                                    |



Table S1. Proteins identified in the OVCAR-3 tumor supernatant by two or more unique peptides.

| Protein or Protein Group | Accession Number | Unique Peptide Count | Spectrum Count | Sequence Coverage (%) | Length | MolWt | pI   | Descriptive Name                                                                                                 |
|--------------------------|------------------|----------------------|----------------|-----------------------|--------|-------|------|------------------------------------------------------------------------------------------------------------------|
| 4016                     | D3YYI8           | 2                    | 2              | 19.7                  | 482    | 55048 | 5.4  | Histone deacetylase                                                                                              |
| 4017                     | B2R5H5           | 2                    | 4              | 19.6                  | 102    | 11829 | 4.7  | cDNA, FLJ92476, highly similar to sapiens LSM3 log, U6 small nuclear RNA associated (S. cerevisiae) (LSM3), mRNA |
| 4017                     | P62310           | 2                    | 4              | 19.6                  | 102    | 11845 | 4.7  | U6 snRNA-associated Sm-like protein LSM3 U6 snRNA-associated Sm-like protein LSM3                                |
| 4018                     | A2A9C8           | 2                    | 3              | 19.4                  | 129    | 14256 | 9.1  | Mediator of RNA polymerase II transcription, subunit 8 log (Yeast)                                               |
| 4018                     | Q9CY05           | 2                    | 3              | 14                    | 179    | 18976 | 9.1  | Mediator of RNA polymerase II transcription, subunit 8 log (Yeast)                                               |
| 4018                     | Q96G25-3         | 2                    | 3              | 14                    | 179    | 19002 | 9.1  | Isoform 3 of Mediator of RNA polymerase II transcription subunit 8                                               |
| 4018                     | Q9DAY7           | 2                    | 3              | 10.7                  | 234    | 25952 | 6.9  | Putative uncharacterized protein                                                                                 |
| 4018                     | Q9D7W5           | 2                    | 3              | 9.3                   | 268    | 29199 | 7    | Mediator of RNA polymerase II transcription subunit 8                                                            |
| 4018                     | Q96G25           | 2                    | 3              | 9.3                   | 268    | 29080 | 7.5  | Mediator of RNA polymerase II transcription subunit 8                                                            |
| 4019                     | D6R9Q5           | 2                    | 2              | 19.3                  | 109    | 12346 | 8.4  | Uncharacterized protein                                                                                          |
| 4019                     | D6RD74           | 2                    | 2              | 16.7                  | 126    | 14218 | 7.5  | Uncharacterized protein                                                                                          |
| 4019                     | Q9UM13           | 2                    | 2              | 11.4                  | 185    | 21252 | 9.1  | Anaphase-promoting complex subunit 10                                                                            |
| 4019                     | Q8K2H6           | 2                    | 2              | 11.4                  | 185    | 21266 | 9.1  | Anaphase-promoting complex subunit 10                                                                            |
| 4020                     | D3YZ20           | 2                    | 3              | 18.9                  | 111    | 12585 | 6.8  | Uncharacterized protein                                                                                          |
| 4020                     | Q9GZM3           | 2                    | 3              | 18.3                  | 115    | 13074 | 6.3  | DNA-directed RNA polymerase II subunit RPB11-b1                                                                  |
| 4020                     | P52435           | 2                    | 3              | 17.9                  | 117    | 13293 | 5.9  | DNA-directed RNA polymerase II subunit RPB11-a                                                                   |
| 4020                     | O08740           | 2                    | 3              | 17.9                  | 117    | 13251 | 5.9  | DNA-directed RNA polymerase II subunit RPB11                                                                     |
| 4020                     | Q9H1A6           | 2                    | 3              | 16.5                  | 127    | 14131 | 5.9  | RPB11a protein                                                                                                   |
| 4020                     | E2QRJ6           | 2                    | 3              | 13.3                  | 158    | 17190 | 5.5  | Uncharacterized protein                                                                                          |
| 4020                     | Q59FR2           | 2                    | 3              | 11.7                  | 180    | 19038 | 6.7  | MGC13098 protein variant (Fragment)                                                                              |
| 4021                     | P24390           | 2                    | 3              | 18.9                  | 212    | 24542 | 8.6  | ER lumen protein retaining receptor 1                                                                            |
| 4021                     | Q99JH8           | 2                    | 3              | 18.9                  | 212    | 24560 | 8.6  | ER lumen protein retaining receptor 1                                                                            |
| 4022                     | D3Z497           | 2                    | 7              | 18.8                  | 112    | 12652 | 6.7  | Uncharacterized protein                                                                                          |
| 4022                     | B2R4X4           | 2                    | 7              | 18.6                  | 113    | 12741 | 5.2  | cDNA, FLJ92255, highly similar to sapiens ring finger protein 7 (RNF7), mRNA                                     |
| 4022                     | UPI0001552CE3    | 2                    | 7              | 18.6                  | 113    | 12706 | 5.8  | PREDICTED: RING-box protein 2-like                                                                               |
| 4022                     | UPI00006069DC    | 2                    | 7              | 18.6                  | 113    | 12734 | 5.5  | PREDICTED: RING-box protein 2-like                                                                               |
| 4022                     | Q9WTZ1           | 2                    | 7              | 18.6                  | 113    | 12707 | 5.5  | RING-box protein 2                                                                                               |
| 4022                     | Q9UBF6           | 2                    | 7              | 18.6                  | 113    | 12683 | 5.5  | RING-box protein 2                                                                                               |
| 4023                     | Q9Y5U9           | 2                    | 3              | 34.1                  | 82     | 8969  | 8.3  | Immediate early response 3-interacting protein 1                                                                 |
| 4023                     | Q9CR20           | 2                    | 3              | 34.1                  | 82     | 9017  | 8.3  | Immediate early response 3-interacting protein 1                                                                 |
| 4023                     | D6R120           | 2                    | 3              | 18.4                  | 152    | 16254 | 8.7  | Uncharacterized protein                                                                                          |
| 4024                     | O96015           | 2                    | 3              | 18.1                  | 105    | 12009 | 5.5  | Dynein light chain 4, axonemal                                                                                   |
| 4024                     | Q9DCM4           | 2                    | 3              | 18.1                  | 105    | 12023 | 5.5  | Dynein light chain 4, axonemal                                                                                   |
| 4024                     | Q6FGB2           | 2                    | 3              | 18.1                  | 105    | 11995 | 5.2  | DNAL4 protein (Fragment)                                                                                         |
| 4024                     | Q53FE0           | 2                    | 3              | 18.1                  | 105    | 11937 | 5.8  | Dynein light chain 4, axonemal variant (Fragment)                                                                |
| 4024                     | Q8CDT8           | 2                    | 3              | 13.7                  | 139    | 15876 | 6.5  | Dynein, axonemal, light chain 4, isoform CRA_c                                                                   |
| 4025                     | Q13595-2         | 2                    | 7              | 28.3                  | 113    | 12952 | 10   | Isoform Short of Transformer-2 protein log alpha                                                                 |
| 4025                     | B4DQI6           | 2                    | 7              | 17.8                  | 180    | 20590 | 10.2 | Transformer-2 protein log alpha                                                                                  |
| 4025                     | B4DUJA9          | 2                    | 7              | 17.7                  | 181    | 20746 | 10.3 | cDNA FLJ50682, highly similar to Transformer-2 protein log                                                       |
| 4025                     | Q6PFR5           | 2                    | 7              | 11.4                  | 281    | 32316 | 11.3 | Transformer-2 protein log alpha                                                                                  |
| 4025                     | Q13595           | 2                    | 7              | 11.3                  | 282    | 32689 | 11.3 | Transformer-2 protein log alpha                                                                                  |
| 4025                     | E9QP00           | 2                    | 7              | 11.3                  | 282    | 32579 | 11.3 | Uncharacterized protein                                                                                          |
| 4026                     | B3KN29           | 2                    | 3              | 16.3                  | 178    | 19290 | 9.2  | cDNA FLJ13371 fis, clone PLACE1000656, highly similar to PRA1 family protein 2                                   |
| 4026                     | Q9JIG8           | 2                    | 3              | 16.3                  | 178    | 19478 | 9.6  | PRA1 family protein 2                                                                                            |
| 4026                     | O60831           | 2                    | 3              | 16.3                  | 178    | 19258 | 9.2  | PRA1 family protein 2                                                                                            |
| 4027                     | UPI000021097A    | 2                    | 3              | 17.5                  | 126    | 14548 | 7    | Golgin subfamily A member 7 (Golgi complex-associated protein of 16 kDa).                                        |
| 4027                     | UPI00001B2F27    | 2                    | 3              | 16.4                  | 134    | 15578 | 8.4  | Golgin subfamily A member 7 isoform b                                                                            |
| 4027                     | Q7Z5G4           | 2                    | 3              | 16.1                  | 137    | 15824 | 7    | Golgin subfamily A member 7                                                                                      |
| 4027                     | Q91W53           | 2                    | 3              | 16.1                  | 137    | 15792 | 7    | Golgin subfamily A member 7                                                                                      |
| 4027                     | Q91W53-2         | 2                    | 3              | 14.4                  | 153    | 17549 | 7.3  | Isoform 2 of Golgin subfamily A member 7                                                                         |
| 4028                     | Q5T092           | 2                    | 4              | 18.4                  | 158    | 18389 | 7.4  | RER1 retention in endoplasmic reticulum 1 log (S. cerevisiae) (Fragment)                                         |
| 4028                     | Q5T091           | 2                    | 4              | 15.5                  | 187    | 21024 | 8.7  | RER1 retention in endoplasmic reticulum 1 log (S. cerevisiae)                                                    |
| 4028                     | O15258           | 2                    | 4              | 14.8                  | 196    | 22958 | 9.5  | Protein RER1                                                                                                     |
| 4028                     | Q9CQU3           | 2                    | 4              | 14.8                  | 196    | 22988 | 9.5  | Protein RER1                                                                                                     |
| 4028                     | Q9P0H9           | 2                    | 4              | 13.6                  | 214    | 24817 | 9.6  | RER1 protein                                                                                                     |
| 4029                     | P55854           | 2                    | 29             | 20.4                  | 103    | 11637 | 5.5  | Small ubiquitin-related modifier 3                                                                               |
| 4029                     | Q9Z172-2         | 2                    | 29             | 19.1                  | 110    | 12345 | 5.9  | Isoform 2 of Small ubiquitin-related modifier 3                                                                  |
| 4029                     | Q9Z172           | 2                    | 29             | 19.1                  | 110    | 12430 | 5.9  | Small ubiquitin-related modifier 3                                                                               |
| 4029                     | A8MUA9           | 2                    | 29             | 15.6                  | 135    | 15318 | 10.4 | SMT3 suppressor of mif two 3 log 3 (Yeast), isoform CRA_d                                                        |
| 4029                     | B4DUW4           | 2                    | 29             | 14.9                  | 141    | 15768 | 6.9  | cDNA FLJ57440, moderately similar to Small ubiquitin-related modifier 3                                          |
| 4029                     | A8MUJ27          | 2                    | 29             | 14.3                  | 147    | 16956 | 9.7  | Uncharacterized protein                                                                                          |
| 4030                     | E9PLB2           | 2                    | 3              | 14                    | 129    | 14584 | 7.5  | Uncharacterized protein                                                                                          |
| 4030                     | E9PMR4           | 2                    | 3              | 7.2                   | 251    | 28067 | 7.7  | Uncharacterized protein                                                                                          |
| 4030                     | Q921J7           | 2                    | 3              | 7.1                   | 253    | 28241 | 7.3  | Cd151 protein                                                                                                    |
| 4030                     | P48509           | 2                    | 3              | 7.1                   | 253    | 28295 | 7.5  | CD151 antigen                                                                                                    |
| 4030                     | O35566           | 2                    | 3              | 7.1                   | 253    | 28246 | 7.5  | CD151 antigen                                                                                                    |
| 4031                     | P49006           | 2                    | 14             | 14.4                  | 195    | 19529 | 4.7  | MARCKS-related protein                                                                                           |
| 4031                     | P28667           | 2                    | 14             | 14                    | 200    | 20165 | 4.6  | MARCKS-related protein                                                                                           |
| 4032                     | E3UN45           | 2                    | 3              | 15.2                  | 165    | 18219 | 6.5  | Insulin-like growth factor II transcript variant 3 isoform 2 (Fragment)                                          |
| 4032                     | A8K6C9           | 2                    | 3              | 13.9                  | 180    | 20172 | 9.3  | cDNA FLJ78037, highly similar to sapiens insulin-like growth factor 2 (somatomedin A), mRNA                      |
| 4032                     | P09535           | 2                    | 3              | 13.9                  | 180    | 20030 | 9.1  | Insulin-like growth factor II                                                                                    |
| 4032                     | P01344           | 2                    | 3              | 13.9                  | 180    | 20140 | 9.3  | Insulin-like growth factor II                                                                                    |
| 4032                     | P01344-2         | 2                    | 3              | 13.7                  | 183    | 20477 | 9.5  | Isoform 2 of Insulin-like growth factor II                                                                       |
| 4032                     | C9JAF2           | 2                    | 3              | 10.6                  | 236    | 26331 | 9.1  | Uncharacterized protein                                                                                          |
| 4033                     | Q94817           | 2                    | 3              | 13.6                  | 140    | 15113 | 5.1  | Ubiquitin-like protein ATG12                                                                                     |
| 4033                     | Q9CQY1           | 2                    | 3              | 13.5                  | 141    | 15207 | 5    | Ubiquitin-like protein ATG12                                                                                     |
| 4034                     | Q3TDG7           | 2                    | 2              | 21                    | 138    | 15576 | 5.6  | Putative uncharacterized protein                                                                                 |
| 4034                     | E9PXXG6          | 2                    | 2              | 21                    | 138    | 15635 | 5.4  | Uncharacterized protein                                                                                          |
| 4034                     | B7ZBD5           | 2                    | 2              | 17.6                  | 165    | 18477 | 4.6  | RAB, member of RAS oncogene family-like 2A                                                                       |
| 4034                     | A8MXF6           | 2                    | 2              | 17.6                  | 165    | 18477 | 4.6  | Uncharacterized protein                                                                                          |
| 4034                     | Q8K2P9           | 2                    | 2              | 13                    | 223    | 25553 | 5.6  | Rab12a protein                                                                                                   |
| 4034                     | E9Q9D5           | 2                    | 2              | 13                    | 223    | 25610 | 5.6  | Uncharacterized protein                                                                                          |
| 4034                     | A0AUY0           | 2                    | 2              | 12.9                  | 224    | 25737 | 4.8  | RABL2A protein                                                                                                   |
| 4034                     | Q9UNT1-2         | 2                    | 2              | 12.7                  | 229    | 26172 | 4.9  | Isoform 2 of Rab-like protein 2B                                                                                 |
| 4034                     | Q9UNT1           | 2                    | 2              | 12.7                  | 228    | 26101 | 4.9  | Rab-like protein 2B                                                                                              |
| 4034                     | Q9UBK7           | 2                    | 2              | 12.7                  | 228    | 26115 | 4.9  | Rab-like protein 2A                                                                                              |
| 4034                     | Q6IC14           | 2                    | 2              | 12.7                  | 229    | 26186 | 4.9  | RABL2A protein                                                                                                   |
| 4034                     | E9PAN8           | 2                    | 2              | 12.2                  | 238    | 27186 | 4.9  | Uncharacterized protein                                                                                          |

Table S1. Proteins identified in the OVCAR-3 tumor supernatant by two or more unique peptides.

| Protein or Protein Group | Accession Number | Unique Peptide Count | Spectrum Count | Sequence Coverage (%) | Length | MolWt | pI   | Descriptive Name                                                                                                                                                                                                                                                                       |
|--------------------------|------------------|----------------------|----------------|-----------------------|--------|-------|------|----------------------------------------------------------------------------------------------------------------------------------------------------------------------------------------------------------------------------------------------------------------------------------------|
| 4034                     | B7ZBD6           | 2                    | 2              | 12.2                  | 238    | 27201 | 4.9  | RAB, member of RAS oncogene family-like 2A                                                                                                                                                                                                                                             |
| 4034                     | Q9D133           | 2                    | 2              | 10.2                  | 285    | 31677 | 6.3  | Putative uncharacterized protein                                                                                                                                                                                                                                                       |
| 4034                     | E9Q9T7           | 2                    | 2              | 10.2                  | 285    | 31676 | 6.6  | Uncharacterized protein                                                                                                                                                                                                                                                                |
| 4035                     | UPI0000D61354    | 2                    | 2              | 12.8                  | 187    | 20711 | 5.6  | Ornithine decarboxylase antizyme 2 (ODC-Az 2) (AZ2).                                                                                                                                                                                                                                   |
| 4035                     | O08608           | 2                    | 2              | 12.7                  | 189    | 21025 | 5.6  | Ornithine decarboxylase antizyme 2                                                                                                                                                                                                                                                     |
| 4035                     | Q9HD73           | 2                    | 2              | 12.7                  | 189    | 20999 | 5.6  | Ornithine decarboxylase antizyme                                                                                                                                                                                                                                                       |
| 4035                     | Q95190           | 2                    | 2              | 12.7                  | 189    | 21011 | 5.4  | Ornithine decarboxylase antizyme 2<br>cDNA, FLJ93804, highly similar to sapiens gp25L2 protein (HSGP25L2G), mRNA                                                                                                                                                                       |
| 4036                     | B2R8A2           | 2                    | 3              | 12.6                  | 214    | 25078 | 7.2  | Transmembrane emp24 domain-containing protein 9                                                                                                                                                                                                                                        |
| 4036                     | Q9BVK6           | 2                    | 3              | 11.5                  | 235    | 27277 | 8    | Transmembrane emp24 domain-containing protein 9                                                                                                                                                                                                                                        |
| 4036                     | Q99KF1           | 2                    | 3              | 11.5                  | 235    | 27127 | 8.4  | Putative uncharacterized protein                                                                                                                                                                                                                                                       |
| 4036                     | Q3U7N8           | 2                    | 3              | 11.5                  | 235    | 27142 | 8    | Putative uncharacterized protein                                                                                                                                                                                                                                                       |
| 4036                     | Q9CZL0           | 2                    | 3              | 10                    | 269    | 30880 | 9.4  | Putative uncharacterized protein                                                                                                                                                                                                                                                       |
| 4036                     | Q3TFU8           | 2                    | 3              | 10                    | 269    | 31259 | 9.6  | Putative uncharacterized protein                                                                                                                                                                                                                                                       |
| 4036                     | E9PW12           | 2                    | 3              | 10                    | 269    | 30742 | 9.1  | Uncharacterized protein                                                                                                                                                                                                                                                                |
| 4037                     | P62273           | 2                    | 2              | 14.3                  | 56     | 6677  | 10.1 | 40S ribosomal protein S29 40S ribosomal protein S29                                                                                                                                                                                                                                    |
| 4037                     | A8MZ73           | 2                    | 2              | 11.9                  | 67     | 8087  | 10   | Ribosomal protein S29                                                                                                                                                                                                                                                                  |
| 4038                     | B7Z4T5           | 2                    | 3              | 20                    | 220    | 24073 | 5.9  | cDNA FLJ52704, highly similar to Homeobox protein Meis1                                                                                                                                                                                                                                |
| 4038                     | Q3SRD5           | 2                    | 3              | 17.8                  | 247    | 26996 | 5.9  | Putative uncharacterized protein MEIS1 (Fragment)                                                                                                                                                                                                                                      |
| 4038                     | Q60954-3         | 2                    | 3              | 11.9                  | 370    | 40622 | 7    | Isoform 3 of Homeobox protein Meis1<br>cDNA, FLJ95861, highly similar to sapiens Meis1, myeloid ecotropic viral integration site 1log (I) (MEIS1), mRNA                                                                                                                                |
| 4038                     | B2RC57           | 2                    | 3              | 11.3                  | 390    | 42958 | 6.4  | Homeobox protein Meis1                                                                                                                                                                                                                                                                 |
| 4038                     | Q60954           | 2                    | 3              | 11.3                  | 390    | 43002 | 6.3  | Homeobox protein Meis1                                                                                                                                                                                                                                                                 |
| 4038                     | O00470           | 2                    | 3              | 11.3                  | 390    | 43016 | 6.3  | Homeobox protein Meis1                                                                                                                                                                                                                                                                 |
| 4038                     | Q60954-2         | 2                    | 3              | 9.5                   | 465    | 50764 | 6.6  | Isoform 2 of Homeobox protein Meis1                                                                                                                                                                                                                                                    |
| 4038                     | O00470-2         | 2                    | 3              | 9.5                   | 463    | 50576 | 6.5  | Isoform 2 of Homeobox protein Meis1                                                                                                                                                                                                                                                    |
| 4038                     | E9PGN2           | 2                    | 3              | 9.5                   | 465    | 50803 | 6.6  | Uncharacterized protein                                                                                                                                                                                                                                                                |
| 4039                     | P62861           | 2                    | 16             | 18.6                  | 59     | 6648  | 12.1 | 40S ribosomal protein S30 40S ribosomal protein S30                                                                                                                                                                                                                                    |
| 4039                     | E9PR30           | 2                    | 16             | 11.2                  | 98     | 10905 | 11.6 | Uncharacterized protein                                                                                                                                                                                                                                                                |
| 4039                     | Q3THB2           | 2                    | 16             | 8.3                   | 133    | 14420 | 10.1 | Putative uncharacterized protein                                                                                                                                                                                                                                                       |
| 4039                     | Q920W8           | 2                    | 16             | 8                     | 137    | 14845 | 9.9  | Fau protein (Fragment)                                                                                                                                                                                                                                                                 |
| 4039                     | Q91V99           | 2                    | 16             | 8                     | 137    | 14787 | 10.1 | Fau protein (Fragment)                                                                                                                                                                                                                                                                 |
| 4040                     | Q5PR73           | 2                    | 3              | 11.1                  | 199    | 22498 | 8.8  | GTP-binding protein Di-Ras2                                                                                                                                                                                                                                                            |
| 4040                     | Q96HU8           | 2                    | 3              | 11.1                  | 199    | 22485 | 8.8  | GTP-binding protein Di-Ras2                                                                                                                                                                                                                                                            |
| 4041                     | Q15773           | 2                    | 2              | 10.9                  | 248    | 28147 | 6.9  | Myeloid leukemia factor 2                                                                                                                                                                                                                                                              |
| 4041                     | Q99KX1           | 2                    | 2              | 10.9                  | 247    | 28055 | 7    | Myeloid leukemia factor 2                                                                                                                                                                                                                                                              |
| 4041                     | Q3UR58           | 2                    | 2              | 10.9                  | 247    | 28154 | 7.3  | Putative uncharacterized protein                                                                                                                                                                                                                                                       |
| 4042                     | B1AWT7           | 2                    | 5              | 17.8                  | 157    | 16784 | 6    | Ubiquitin-conjugating enzyme E2 J1 (Fragment)                                                                                                                                                                                                                                          |
| 4042                     | A3KG52           | 2                    | 5              | 10.7                  | 261    | 28809 | 7.3  | Ubiquitin-conjugating enzyme E2 J1 (Fragment)<br>cDNA FLJ52165, highly similar to Ubiquitin-conjugating enzyme E2 J1 (EC 6.3.2.19)                                                                                                                                                     |
| 4042                     | B4DUF8           | 2                    | 5              | 9.2                   | 303    | 33311 | 6.2  | Ubiquitin-conjugating enzyme E2 J1                                                                                                                                                                                                                                                     |
| 4042                     | Q9Y385           | 2                    | 5              | 8.8                   | 318    | 35199 | 6.8  | Ubiquitin-conjugating enzyme E2 J1                                                                                                                                                                                                                                                     |
| 4042                     | Q9JJZ4           | 2                    | 5              | 8.8                   | 318    | 34990 | 7    | Ubiquitin-conjugating enzyme E2 J1<br>Ubiquitin-conjugating enzyme E2, J1 (UBC6 log, yeast), isoform CRA_a (Fragment)                                                                                                                                                                  |
| 4042                     | Q53F25           | 2                    | 5              | 8.8                   | 318    | 35185 | 6.8  | Putative uncharacterized protein                                                                                                                                                                                                                                                       |
| 4042                     | Q3UDP8           | 2                    | 5              | 8.8                   | 318    | 35018 | 7.2  | Putative uncharacterized protein                                                                                                                                                                                                                                                       |
| 4042                     | Q3TV38           | 2                    | 5              | 8.8                   | 318    | 34976 | 7    | Putative uncharacterized protein                                                                                                                                                                                                                                                       |
| 4043                     | E9QPC5           | 2                    | 2              | 10.6                  | 350    | 40709 | 5.6  | Uncharacterized protein                                                                                                                                                                                                                                                                |
| 4043                     | Q3UIK4-2         | 2                    | 2              | 10.6                  | 350    | 40721 | 5.6  | Isoform 2 of Methyltransferase-like protein 14                                                                                                                                                                                                                                         |
| 4043                     | Q9HCE5           | 2                    | 2              | 8.1                   | 456    | 52150 | 6.2  | Methyltransferase-like protein 14                                                                                                                                                                                                                                                      |
| 4043                     | Q3UIK4           | 2                    | 2              | 8.1                   | 456    | 52122 | 6.2  | Methyltransferase-like protein 14<br>cDNA, FLJ78916, highly similar to Mothers against decapentaplegic log 3 (SMAD3) cDNA, FLJ78916, highly similar to Mothers against decapentaplegic log 3 (SMAD3)<br>cDNA FLJ54532, highly similar to Mothers against decapentaplegic log 3 (SMAD3) |
| 4044                     | B7Z9Q2           | 2                    | 2              | 12.5                  | 320    | 35895 | 5.4  | MAD, mothers against decapentaplegic log 3 variant (Fragment)<br>Mothers against decapentaplegic log 3 Mothers against decapentaplegic log 3                                                                                                                                           |
| 4044                     | B7Z4Z5           | 2                    | 2              | 10.5                  | 381    | 43237 | 7    | Mothers against decapentaplegic log 2 (SMAD2)                                                                                                                                                                                                                                          |
| 4044                     | Q59F45           | 2                    | 2              | 10.4                  | 386    | 43659 | 6.8  | Mothers against decapentaplegic log 2 (SMAD2)<br>Isoform Short of Mothers against decapentaplegic log 2 Isoform Short of Mothers against decapentaplegic log 2                                                                                                                         |
| 4044                     | P84022           | 2                    | 2              | 9.4                   | 425    | 48081 | 7.2  | Uncharacterized protein                                                                                                                                                                                                                                                                |
| 4044                     | B7Z5N5           | 2                    | 2              | 9.3                   | 431    | 48669 | 7.1  | Mothers against decapentaplegic log 2<br>cDNA FLJ50177, highly similar to Mothers against decapentaplegic log 2 (SMAD 2)                                                                                                                                                               |
| 4044                     | Q15796-2         | 2                    | 2              | 9.2                   | 437    | 48956 | 7.1  | Mothers against decapentaplegic log 2                                                                                                                                                                                                                                                  |
| 4044                     | E9Q3M0           | 2                    | 2              | 9.2                   | 434    | 48683 | 6.8  | Mothers against decapentaplegic log 2                                                                                                                                                                                                                                                  |
| 4044                     | Q62432           | 2                    | 2              | 8.6                   | 467    | 52266 | 6.6  | Mothers against decapentaplegic log 2                                                                                                                                                                                                                                                  |
| 4044                     | Q15796           | 2                    | 2              | 8.6                   | 467    | 52306 | 6.6  | Mothers against decapentaplegic log 2<br>cDNA FLJ50634, highly similar to Peroxisomal targeting signal 1 receptor                                                                                                                                                                      |
| 4045                     | B4DS19           | 2                    | 2              | 10.3                  | 368    | 40922 | 4.8  | Isoform 2 of Peroxisomal targeting signal 1 receptor                                                                                                                                                                                                                                   |
| 4045                     | P50542-2         | 2                    | 2              | 6.3                   | 602    | 66830 | 4.5  | Isoform 2 of Peroxisomal targeting signal 1 receptor                                                                                                                                                                                                                                   |
| 4045                     | O09012-2         | 2                    | 2              | 6.3                   | 602    | 66806 | 4.6  | Isoform 2 of Peroxisomal targeting signal 1 receptor                                                                                                                                                                                                                                   |
| 4045                     | P50542-3         | 2                    | 2              | 6                     | 631    | 69872 | 4.6  | Isoform 3 of Peroxisomal targeting signal 1 receptor                                                                                                                                                                                                                                   |
| 4045                     | D3Z600           | 2                    | 2              | 6                     | 632    | 69836 | 4.5  | Uncharacterized protein                                                                                                                                                                                                                                                                |
| 4045                     | P50542           | 2                    | 2              | 5.9                   | 639    | 70865 | 4.5  | Peroxisomal targeting signal 1 receptor                                                                                                                                                                                                                                                |
| 4045                     | O09012           | 2                    | 2              | 5.9                   | 639    | 70756 | 4.5  | Peroxisomal targeting signal 1 receptor<br>cDNA FLJ52372, highly similar to Peroxisomal targeting signal 1 receptor                                                                                                                                                                    |
| 4045                     | B4DZ45           | 2                    | 2              | 5.8                   | 654    | 72291 | 4.5  | RWD domain containing 4A                                                                                                                                                                                                                                                               |
| 4046                     | C9J9G5           | 2                    | 3              | 10.2                  | 187    | 21114 | 5.2  | RWD domain-containing protein 4                                                                                                                                                                                                                                                        |
| 4046                     | Q9CPR1           | 2                    | 3              | 10.1                  | 188    | 21138 | 5.6  | RWD domain-containing protein 4                                                                                                                                                                                                                                                        |
| 4046                     | Q6NW29           | 2                    | 3              | 10.1                  | 188    | 21251 | 5.3  | RWD domain-containing protein 4                                                                                                                                                                                                                                                        |
| 4047                     | A6XGP7           | 2                    | 3              | 10.1                  | 199    | 22252 | 9.2  | Nogo-C                                                                                                                                                                                                                                                                                 |
| 4047                     | Q7L7Q5           | 2                    | 3              | 10.1                  | 199    | 22395 | 9.3  | RTN4                                                                                                                                                                                                                                                                                   |
| 4047                     | Q78NS1           | 2                    | 3              | 10.1                  | 199    | 22466 | 9.4  | RTN4                                                                                                                                                                                                                                                                                   |
| 4048                     | E7EWD7           | 2                    | 4              | 10                    | 230    | 25444 | 6    | Uncharacterized protein                                                                                                                                                                                                                                                                |
| 4048                     | Q6V963           | 2                    | 4              | 10                    | 230    | 25445 | 5.5  | CREB                                                                                                                                                                                                                                                                                   |
| 4048                     | UPI0000D62CF1    | 2                    | 4              | 8.7                   | 264    | 28713 | 5.5  | cAMP responsive element binding protein 1                                                                                                                                                                                                                                              |
| 4048                     | Q8VDJ8           | 2                    | 4              | 7                     | 327    | 35096 | 5.4  | cAMP responsive element binding protein 1                                                                                                                                                                                                                                              |
| 4048                     | Q543W0           | 2                    | 4              | 7                     | 327    | 35122 | 5.3  | cAMP responsive element binding protein 1, isoform CRA_a<br>cAMP responsive element binding protein 1, isoform CRA_b (Fragment)                                                                                                                                                        |
| 4048                     | Q53X93           | 2                    | 4              | 7                     | 327    | 35136 | 5.3  | Cyclic AMP-responsive element-binding protein 1                                                                                                                                                                                                                                        |
| 4048                     | Q01147           | 2                    | 4              | 6.7                   | 341    | 36674 | 5.6  | Cyclic AMP-responsive element-binding protein 1                                                                                                                                                                                                                                        |
| 4048                     | P16220           | 2                    | 4              | 6.7                   | 341    | 36688 | 5.6  | Cyclic AMP-responsive element-binding protein 1                                                                                                                                                                                                                                        |
| 4049                     | UPI0001889EB5    | 2                    | 2              | 11.7                  | 128    | 14423 | 4.8  | NADH dehydrogenase (ubiquinone) 1, alpha/beta subcomplex, 1                                                                                                                                                                                                                            |
| 4049                     | Q14561           | 2                    | 2              | 9.6                   | 156    | 17417 | 4.9  | Acyl carrier protein, mitochondrial                                                                                                                                                                                                                                                    |
| 4049                     | UPI0000024168    | 2                    | 2              | 9.6                   | 156    | 17442 | 5.1  | PREDICTED: acyl carrier protein, mitochondrial-like                                                                                                                                                                                                                                    |
| 4049                     | Q9CR21           | 2                    | 2              | 9.6                   | 156    | 17370 | 5.2  | Acyl carrier protein, mitochondrial                                                                                                                                                                                                                                                    |
| 4049                     | Q3TJG2           | 2                    | 2              | 9.6                   | 156    | 17386 | 5.2  | Acyl carrier protein                                                                                                                                                                                                                                                                   |
| 4050                     | A2A9E9           | 2                    | 2              | 9.4                   | 310    | 34540 | 5.1  | GNP-loop GTPase 2                                                                                                                                                                                                                                                                      |
| 4050                     | Q9H9Y4           | 2                    | 2              | 9.4                   | 310    | 34561 | 5.2  | GNP-loop GTPase 2                                                                                                                                                                                                                                                                      |
| 4050                     | Q8VEJ1           | 2                    | 2              | 9.4                   | 310    | 34556 | 5.1  | GNP-loop GTPase 2<br>bifunctional UDP-N-acetylglucosamine 2-epimerase/N-acetylmannosamine kinase isoform 5<br>cDNA FLJ51479, highly similar to Bifunctional UDP-N-acetylglucosamine2-epimerase/N- acetylmannosamine kinase                                                             |
| 4051                     | UPI0001D8D93F    | 2                    | 3              | 10.5                  | 612    | 66784 | 6.8  |                                                                                                                                                                                                                                                                                        |
| 4051                     | B7Z372           | 2                    | 3              | 10.5                  | 612    | 66756 | 6.9  |                                                                                                                                                                                                                                                                                        |

Table S1. Proteins identified in the OVCAR-3 tumor supernatant by two or more unique peptides.

| Protein or Protein Group | Accession Number | Unique Peptide Count | Spectrum Count | Sequence Coverage (%) | Length | MolWt | pI  | Descriptive Name                                                                                             |
|--------------------------|------------------|----------------------|----------------|-----------------------|--------|-------|-----|--------------------------------------------------------------------------------------------------------------|
| 4051                     | A7UNU7           | 2                    | 3              | 9.9                   | 648    | 71278 | 6.8 | Mutant UDP-N-acetylglucosamine 2-epimerase/N-acetylmannosamine kinase                                        |
| 4051                     | A6PZH3           | 2                    | 3              | 9.4                   | 681    | 74645 | 6.9 | UDP-N-acetylglucosamine 2-epimerase/N-acetylmannosamine kinase                                               |
| 4051                     | B7Z428           | 2                    | 3              | 9.4                   | 681    | 74702 | 6.9 | cDNA FLJ52319, highly similar to Bifunctional UDP-N-acetylglucosamine 2-epimerase/N-acetylmannosamine kinase |
| 4051                     | Q9Y223           | 2                    | 3              | 8.9                   | 722    | 79275 | 6.8 | Bifunctional UDP-N-acetylglucosamine 2-epimerase/N-acetylmannosamine kinase                                  |
| 4051                     | Q91WG8           | 2                    | 3              | 8.9                   | 722    | 79199 | 6.8 | UDP-N-acetylglucosamine-2-epimerase/N-acetylmannosamine kinase                                               |
| 4051                     | Q6QNY7           | 2                    | 3              | 8.9                   | 722    | 79305 | 6.7 | UDP-N-acetylglucosamine-2-epimerase / N-acetylmannosamine kinase                                             |
| 4051                     | Q6QNY6           | 2                    | 3              | 8.9                   | 722    | 79232 | 6.7 | UDP-N-acetylglucosamine-2-epimerase / N-acetylmannosamine kinase                                             |
| 4051                     | Q6QNY5           | 2                    | 3              | 8.9                   | 722    | 79374 | 6.9 | UDP-N-acetylglucosamine-2-epimerase / N-acetylmannosamine kinase                                             |
| 4052                     | B3KUJ0           | 2                    | 20             | 9.4                   | 424    | 44484 | 8.2 | cDNA FLJ39996 fis, clone STOMA2002166, highly similar to Splicing factor 3B subunit 4                        |
| 4052                     | Q8QZY9           | 2                    | 20             | 9.4                   | 424    | 44356 | 8.6 | Splicing factor 3B subunit 4                                                                                 |
| 4052                     | Q53FG6           | 2                    | 20             | 9.4                   | 424    | 44387 | 8.2 | Splicing factor 3b, subunit 4 variant (Fragment)                                                             |
| 4052                     | Q15427           | 2                    | 20             | 9.4                   | 424    | 44386 | 8.6 | Splicing factor 3B subunit 4                                                                                 |
| 4053                     | Q8IV50           | 2                    | 2              | 9.3                   | 215    | 23463 | 5.4 | LysM and putative peptidoglycan-binding domain-containing protein 2                                          |
| 4053                     | UPI00000239D2    | 2                    | 2              | 9.3                   | 215    | 23594 | 5.5 | lysM and putative peptidoglycan-binding domain-containing protein 2                                          |
| 4053                     | Q9D7V2           | 2                    | 2              | 9.3                   | 215    | 23694 | 5.7 | LysM and putative peptidoglycan-binding domain-containing protein 2                                          |
| 4054                     | Q13432-2         | 2                    | 3              | 10.9                  | 220    | 24112 | 7.3 | Isoform B of Protein unc-119 log A                                                                           |
| 4054                     | Q9Z2R6           | 2                    | 3              | 10                    | 240    | 27010 | 6.2 | Protein unc-119 log A                                                                                        |
| 4054                     | Q13432           | 2                    | 3              | 10                    | 240    | 26962 | 6.4 | Protein unc-119 log A                                                                                        |
| 4054                     | B1AQD9           | 2                    | 3              | 9.2                   | 262    | 29217 | 6.2 | Unc-119 log (C. elegans)                                                                                     |
| 4055                     | B3KRS9           | 2                    | 3              | 9.1                   | 132    | 15257 | 6.7 | cDNA FLJ34851 fis, clone NT2NE2011998, highly similar to BTB/POZ domain-containing protein KCTD10            |
| 4055                     | B3KVY5           | 2                    | 3              | 9.1                   | 132    | 15315 | 6.4 | Potassium channel tetramerisation domain containing 10, isoform CRA_a                                        |
| 4055                     | Q9H3F6-2         | 2                    | 3              | 4.1                   | 290    | 32779 | 6.6 | Isoform 2 of BTB/POZ domain-containing adapter for CUL3-mediated RhoA degradation protein 3                  |
| 4055                     | Q9H3F6           | 2                    | 3              | 3.8                   | 313    | 35432 | 6.3 | BTB/POZ domain-containing adapter for CUL3-mediated RhoA degradation protein 3                               |
| 4055                     | Q922M3           | 2                    | 3              | 3.8                   | 315    | 35701 | 6.3 | BTB/POZ domain-containing adapter for CUL3-mediated RhoA degradation protein 3                               |
| 4055                     | E9PU91           | 2                    | 3              | 3.8                   | 316    | 35830 | 6.3 | Uncharacterized protein                                                                                      |
| 4056                     | B7ZA62           | 2                    | 3              | 12.5                  | 271    | 31202 | 6.1 | cDNA, FLJ79076, highly similar to Dual specificity mitogen-activated protein kinase kinase 4 (EC 2.7.12.2)   |
| 4056                     | Q8K2U0           | 2                    | 3              | 12.1                  | 281    | 32249 | 6.6 | Map2k4 protein                                                                                               |
| 4056                     | B7Z9Y5           | 2                    | 3              | 12.1                  | 281    | 32161 | 6.9 | cDNA, FLJ78999, highly similar to Dual specificity mitogen-activated protein kinase kinase 4 (EC 2.7.12.2)   |
| 4056                     | B4DH44           | 2                    | 3              | 9                     | 376    | 42545 | 8.1 | cDNA FLJ52538, highly similar to Dual specificity mitogen-activated protein kinase kinase 4 (EC 2.7.12.2)    |
| 4056                     | P47809           | 2                    | 3              | 8.6                   | 397    | 44114 | 8.1 | Dual specificity mitogen-activated protein kinase kinase 4                                                   |
| 4056                     | P45985           | 2                    | 3              | 8.5                   | 399    | 44288 | 8.1 | Dual specificity mitogen-activated protein kinase kinase 4                                                   |
| 4056                     | P45985-2         | 2                    | 3              | 8.3                   | 410    | 45584 | 8   | Isoform 2 of Dual specificity mitogen-activated protein kinase kinase 4                                      |
| 4057                     | P12532           | 2                    | 2              | 8.9                   | 417    | 47037 | 8.3 | Creatine kinase U-type, mitochondrial                                                                        |
| 4057                     | P30275           | 2                    | 2              | 8.9                   | 418    | 47004 | 8.2 | Creatine kinase U-type, mitochondrial                                                                        |
| 4057                     | P12532-2         | 2                    | 2              | 8.3                   | 448    | 50421 | 8.6 | Isoform 2 of Creatine kinase U-type, mitochondrial                                                           |
| 4058                     | B2KFR4           | 2                    | 2              | 8.6                   | 464    | 53772 | 7   | MCG15023                                                                                                     |
| 4058                     | Q9Y2H1           | 2                    | 2              | 8.6                   | 464    | 54003 | 6.8 | Serine/threonine-protein kinase 38-like                                                                      |
| 4058                     | Q7TSE6           | 2                    | 2              | 8.6                   | 464    | 53786 | 7   | Serine/threonine-protein kinase 38-like                                                                      |
| 4058                     | Q7TSE6-2         | 2                    | 2              | 8.5                   | 471    | 54624 | 7   | Isoform 2 of Serine/threonine-protein kinase 38-like                                                         |
| 4058                     | B2KFR5           | 2                    | 2              | 8.5                   | 471    | 54610 | 7   | Serine/threonine kinase 38 like                                                                              |
| 4059                     | Q00534           | 2                    | 2              | 8.6                   | 326    | 36938 | 6.5 | Cyclin-dependent kinase 6                                                                                    |
| 4059                     | Q64261           | 2                    | 2              | 8.6                   | 326    | 37028 | 6.6 | Cyclin-dependent kinase 6                                                                                    |
| 4059                     | Q3U4J9           | 2                    | 2              | 8.6                   | 326    | 36959 | 6.5 | Putative uncharacterized protein                                                                             |
| 4060                     | A6QKW0           | 2                    | 2              | 8.5                   | 247    | 27951 | 9.7 | SHINC3                                                                                                       |
| 4060                     | Q9CR67           | 2                    | 2              | 8.5                   | 247    | 28031 | 9.7 | Transmembrane protein 33                                                                                     |
| 4060                     | P57088           | 2                    | 2              | 8.5                   | 247    | 27978 | 9.7 | Transmembrane protein 33                                                                                     |
| 4061                     | B2KG22           | 2                    | 2              | 8.3                   | 229    | 26202 | 7.1 | Likely orthologue of H. sapiens chromosome 12 open reading frame 11 (C12orf11) (Fragment)                    |
| 4061                     | UPI00004565E4    | 2                    | 2              | 6.5                   | 292    | 33629 | 6.4 | Uncharacterized protein C12orf11 (Sarcoma antigen NY-SAR-95).                                                |
| 4061                     | Q9NW22           | 2                    | 2              | 6.5                   | 294    | 33873 | 6.4 | cDNA FLJ10360 fis, clone NT2RM2001247                                                                        |
| 4061                     | B4DNK1           | 2                    | 2              | 3.1                   | 605    | 68495 | 6.8 | cDNA FLJ58152                                                                                                |
| 4061                     | Q9NVM9           | 2                    | 2              | 2.7                   | 706    | 80225 | 6.7 | Cell cycle regulator Mat89Bb log                                                                             |
| 4061                     | Q8QZV7           | 2                    | 2              | 2.6                   | 732    | 82750 | 6.9 | Cell cycle regulator Mat89Bb log                                                                             |
| 4061                     | E9QLV7           | 2                    | 2              | 2.6                   | 732    | 82780 | 6.9 | Uncharacterized protein                                                                                      |
| 4062                     | UPI0001F78EF4    | 2                    | 3              | 22.1                  | 204    | 23242 | 9.4 | UPI0001F78EF4 UniRef100 entry                                                                                |
| 4062                     | E9Q648           | 2                    | 3              | 13.5                  | 334    | 38775 | 6   | Uncharacterized protein                                                                                      |
| 4062                     | B1AA15           | 2                    | 3              | 8.2                   | 547    | 62210 | 5.8 | Gastric cancer hepatocellular carcinoma suppressor 1 variant                                                 |
| 4062                     | E9PYD3           | 2                    | 3              | 8.2                   | 547    | 62232 | 5.6 | Uncharacterized protein                                                                                      |
| 4062                     | E7EVT8           | 2                    | 3              | 8.2                   | 547    | 62167 | 5.7 | Uncharacterized protein                                                                                      |
| 4062                     | Q8CCB4-2         | 2                    | 3              | 6.9                   | 655    | 73703 | 6.6 | Isoform 2 of Vacuolar protein sorting-associated protein 53 log                                              |
| 4062                     | C9JS52           | 2                    | 3              | 6.8                   | 666    | 75809 | 5.9 | Uncharacterized protein                                                                                      |
| 4062                     | Q5VIR6-3         | 2                    | 3              | 6.7                   | 673    | 76569 | 5.8 | Isoform 3 of Vacuolar protein sorting-associated protein 53 log                                              |
| 4062                     | B1AA17           | 2                    | 3              | 6.7                   | 670    | 76395 | 6.1 | Gastric cancer hepatocellular carcinoma suppressor 1 variant                                                 |
| 4062                     | Q5VIR6           | 2                    | 3              | 6.4                   | 699    | 79653 | 6   | Vacuolar protein sorting-associated protein 53 log                                                           |
| 4062                     | E9PXG9           | 2                    | 3              | 5.6                   | 803    | 91122 | 6.6 | Uncharacterized protein                                                                                      |
| 4062                     | UPI0000DBEF01    | 2                    | 3              | 5.4                   | 832    | 94405 | 6.7 | vacuolar protein sorting-associated protein 53 log isoform 1                                                 |
| 4062                     | Q8CCB4           | 2                    | 3              | 5.4                   | 832    | 94423 | 6.6 | Vacuolar protein sorting-associated protein 53 log                                                           |
| 4062                     | Q3UDN2           | 2                    | 3              | 5.4                   | 832    | 94351 | 6.7 | Putative uncharacterized protein                                                                             |
| 4062                     | Q3TX19           | 2                    | 3              | 5.4                   | 832    | 94481 | 6.5 | Putative uncharacterized protein                                                                             |
| 4062                     | Q3TLZ3           | 2                    | 3              | 5.4                   | 832    | 94391 | 6.6 | Putative uncharacterized protein                                                                             |
| 4062                     | Q3TJT1           | 2                    | 3              | 5.4                   | 832    | 94427 | 6.6 | Putative uncharacterized protein                                                                             |
| 4062                     | B3FH42           | 2                    | 3              | 5.4                   | 832    | 94377 | 6.6 | Vps53 long isoform                                                                                           |
| 4063                     | Q9UGV2-2         | 2                    | 4              | 8.8                   | 363    | 39982 | 5.4 | Isoform 2 of Protein NDRG3                                                                                   |
| 4063                     | Q9UGV2           | 2                    | 4              | 8.5                   | 375    | 41409 | 5.3 | Protein NDRG3                                                                                                |
| 4063                     | Q9QYF9           | 2                    | 4              | 8.5                   | 375    | 41555 | 5.2 | Protein NDRG3                                                                                                |
| 4063                     | Q5TH30           | 2                    | 4              | 8.2                   | 388    | 42850 | 5.3 | NDRG family member 3                                                                                         |
| 4063                     | Q8VCV2           | 2                    | 4              | 8.2                   | 388    | 42983 | 5.3 | N-myc downstream regulated gene 3                                                                            |
| 4064                     | Q8K479           | 2                    | 2              | 8.2                   | 243    | 25437 | 6.7 | Complement C1q tumor necrosis factor-related protein 5                                                       |
| 4064                     | Q9BXJ0           | 2                    | 2              | 8.2                   | 243    | 25298 | 6.5 | Complement C1q tumor necrosis factor-related protein 5                                                       |
| 4064                     | Q8R002           | 2                    | 2              | 8.2                   | 243    | 25421 | 6.7 | C1q and tumor necrosis factor related protein 5                                                              |
| 4065                     | Q9NQL2-2         | 2                    | 5              | 12.9                  | 249    | 28611 | 7.2 | Isoform 2 of Ras-related GTP-binding protein D                                                               |

Table S1. Proteins identified in the OVCAR-3 tumor supernatant by two or more unique peptides.

| Protein or Protein Group | Accession Number | Unique Peptide Count | Spectrum Count | Sequence Coverage (%) | Length | MolWt | pI  | Descriptive Name                                                                                                                                                   |
|--------------------------|------------------|----------------------|----------------|-----------------------|--------|-------|-----|--------------------------------------------------------------------------------------------------------------------------------------------------------------------|
| 4065                     | B4DQ03           | 2                    | 5              | 11.5                  | 279    | 31695 | 5.3 | cDNA FLJ57859, highly similar to Ras-related GTP-binding protein C                                                                                                 |
| 4065                     | B1AWT4           | 2                    | 5              | 11.5                  | 279    | 32023 | 7.5 | Ras-related GTP binding D                                                                                                                                          |
| 4065                     | D3DPT8           | 2                    | 5              | 9.6                   | 333    | 37903 | 5.6 | Ras-related GTP binding C, isoform CRA_a                                                                                                                           |
| 4065                     | E7ENI3           | 2                    | 5              | 8.8                   | 365    | 40262 | 5.1 | Uncharacterized protein<br>cDNA FLJ55138, highly similar to Ras-related GTP-binding protein C                                                                      |
| 4065                     | B4DQG4           | 2                    | 5              | 8.8                   | 365    | 40230 | 5.1 | Ras-related GTP binding D                                                                                                                                          |
| 4065                     | B1AWT2           | 2                    | 5              | 8                     | 399    | 45145 | 4.9 | Ras-related GTP-binding protein D                                                                                                                                  |
| 4065                     | Q9NQL2           | 2                    | 5              | 8                     | 400    | 45588 | 4.9 | Ras-related GTP-binding protein C                                                                                                                                  |
| 4065                     | Q9HB90           | 2                    | 5              | 8                     | 399    | 44224 | 5.1 | Ras-related GTP-binding protein C                                                                                                                                  |
| 4065                     | Q99K70           | 2                    | 5              | 8                     | 398    | 44121 | 5.1 | Ras-related GTP-binding protein D                                                                                                                                  |
| 4065                     | Q7TT45           | 2                    | 5              | 7.1                   | 449    | 51232 | 5.3 | Ras-related GTP-binding protein D                                                                                                                                  |
| 4065                     | B1AWT3           | 2                    | 5              | 7                     | 454    | 51803 | 5.2 | Ras-related GTP binding D<br>cDNA FLJ77343, highly similar to sapiens electron-transfer-flavoprotein, beta polypeptide(ETFB), mRNA                                 |
| 4066                     | A8K766           | 2                    | 2              | 7.8                   | 255    | 27922 | 8.4 | Electron transfer flavoprotein subunit beta                                                                                                                        |
| 4066                     | Q9DCW4           | 2                    | 2              | 7.8                   | 255    | 27623 | 8.1 | Electron transfer flavoprotein subunit beta                                                                                                                        |
| 4066                     | P38117           | 2                    | 2              | 7.8                   | 255    | 27844 | 8.1 | Electron transfer flavoprotein subunit beta                                                                                                                        |
| 4066                     | P38117-2         | 2                    | 2              | 5.8                   | 346    | 37434 | 7.2 | Isoform 2 of Electron transfer flavoprotein subunit beta                                                                                                           |
| 4067                     | Q3V1W5           | 2                    | 7              | 7.9                   | 394    | 44685 | 6   | Putative uncharacterized protein<br>cDNA FLJ52341, highly similar to sapiens sarcoglycan, epsilon (SGCE), mRNA                                                     |
| 4067                     | B4DP78           | 2                    | 7              | 7.8                   | 396    | 45053 | 6.3 | Uncharacterized protein                                                                                                                                            |
| 4067                     | E9PEH6           | 2                    | 7              | 7.8                   | 396    | 45069 | 6.1 | Uncharacterized protein                                                                                                                                            |
| 4067                     | Q4H438           | 2                    | 7              | 7.4                   | 419    | 47282 | 6.5 | Epsilon-Sarcoglycan splicing variant 3A                                                                                                                            |
| 4067                     | Q6L8N9           | 2                    | 7              | 7.3                   | 427    | 48436 | 6.1 | Brain epsilon-sarcoglycan                                                                                                                                          |
| 4067                     | D3Z572           | 2                    | 7              | 7.2                   | 428    | 48635 | 6.5 | Uncharacterized protein                                                                                                                                            |
| 4067                     | C9JR67           | 2                    | 7              | 7.2                   | 428    | 48751 | 6.5 | Uncharacterized protein                                                                                                                                            |
| 4067                     | O70258           | 2                    | 7              | 7.1                   | 437    | 49736 | 6.4 | Epsilon-sarcoglycan                                                                                                                                                |
| 4067                     | O43556           | 2                    | 7              | 7.1                   | 437    | 49851 | 6.5 | Epsilon-sarcoglycan                                                                                                                                                |
| 4067                     | E9PXU0           | 2                    | 7              | 7.1                   | 434    | 49139 | 6.3 | Uncharacterized protein                                                                                                                                            |
| 4067                     | E9PX46           | 2                    | 7              | 7                     | 443    | 50241 | 6.1 | Uncharacterized protein                                                                                                                                            |
| 4067                     | E9PF60           | 2                    | 7              | 6.9                   | 451    | 51414 | 6.2 | Uncharacterized protein                                                                                                                                            |
| 4067                     | UPI0000D4E987    | 2                    | 7              | 6.7                   | 462    | 52525 | 6.5 | epsilon-sarcoglycan isoform 1                                                                                                                                      |
| 4067                     | B5MDA7           | 2                    | 7              | 6.7                   | 462    | 52646 | 6.5 | Uncharacterized protein                                                                                                                                            |
| 4067                     | O70258-2         | 2                    | 7              | 6.6                   | 473    | 53532 | 7   | Isoform 2 of Epsilon-sarcoglycan<br>cDNA FLJ50763, highly similar to sapiens sarcoglycan, epsilon (SGCE), mRNA                                                     |
| 4067                     | B7Z2R4           | 2                    | 7              | 6.6                   | 471    | 53434 | 6.7 | Uncharacterized protein                                                                                                                                            |
| 4068                     | B4DSY4           | 2                    | 2              | 7.6                   | 331    | 35787 | 6.2 | cDNA FLJ52894, highly similar to Isocitrate dehydrogenase                                                                                                          |
| 4068                     | E7EWD2           | 2                    | 2              | 7.6                   | 331    | 35786 | 6.4 | Uncharacterized protein                                                                                                                                            |
| 4068                     | Q9D6R2           | 2                    | 2              | 6.8                   | 366    | 39639 | 6.7 | Isocitrate dehydrogenase [NAD] subunit alpha, mitochondrial                                                                                                        |
| 4068                     | O53GF8           | 2                    | 2              | 6.8                   | 366    | 39620 | 6.9 | Isocitrate dehydrogenase 3 (NAD+) alpha variant (Fragment)                                                                                                         |
| 4068                     | P50213           | 2                    | 2              | 6.8                   | 366    | 39592 | 6.9 | Isocitrate dehydrogenase [NAD] subunit alpha, mitochondrial                                                                                                        |
| 4069                     | B4E2M1           | 2                    | 3              | 7.5                   | 428    | 48557 | 6.8 | cDNA FLJ58478, highly similar to Glypican-6                                                                                                                        |
| 4069                     | Q9Y625           | 2                    | 3              | 5.8                   | 555    | 62736 | 5.4 | Glypican-6                                                                                                                                                         |
| 4069                     | Q9R087           | 2                    | 3              | 5.8                   | 555    | 63057 | 5.4 | Glypican-6                                                                                                                                                         |
| 4069                     | Q3TP69           | 2                    | 3              | 5.8                   | 555    | 62985 | 5.5 | Putative uncharacterized protein                                                                                                                                   |
| 4069                     | Q8R3X6           | 2                    | 3              | 5.7                   | 565    | 64340 | 5.7 | Glypican 6                                                                                                                                                         |
| 4070                     | B7Z7L2           | 2                    | 3              | 7.5                   | 429    | 50244 | 5.8 | cDNA FLJ51383, highly similar to Serine/threonine-protein phosphatase 2A 56 kDa regulatory subunit alpha isoform                                                   |
| 4070                     | Q6PD03           | 2                    | 3              | 6.6                   | 486    | 56347 | 7   | Serine/threonine-protein phosphatase 2A 56 kDa regulatory subunit alpha isoform<br>Serine/threonine-protein phosphatase 2A 56 kDa regulatory subunit alpha isoform |
| 4070                     | Q15172           | 2                    | 3              | 6.6                   | 486    | 56194 | 6.7 | Serine/threonine-protein phosphatase 2A 56 kDa regulatory subunit alpha isoform                                                                                    |
| 4070                     | UPI00015DF6A4    | 2                    | 3              | 6.5                   | 490    | 56810 | 7.1 | protein phosphatase 2, regulatory subunit B (B56), alpha isoform                                                                                                   |
| 4070                     | Q3ULN8           | 2                    | 3              | 6.5                   | 489    | 56770 | 6.9 | Putative uncharacterized protein (Fragment)                                                                                                                        |
| 4071                     | C9JM82           | 2                    | 3              | 9                     | 301    | 34673 | 6.2 | Uncharacterized protein                                                                                                                                            |
| 4071                     | E7ENS5           | 2                    | 3              | 7.4                   | 366    | 42406 | 6.7 | Uncharacterized protein                                                                                                                                            |
| 4071                     | Q9Z2O6           | 2                    | 3              | 7.3                   | 369    | 42748 | 6.7 | Septin-5                                                                                                                                                           |
| 4071                     | Q99719           | 2                    | 3              | 7.3                   | 369    | 42777 | 6.7 | Septin-5                                                                                                                                                           |
| 4071                     | B7ZNM7           | 2                    | 3              | 7.1                   | 381    | 44081 | 6.8 | Sept5 protein                                                                                                                                                      |
| 4071                     | Q7KYV2           | 2                    | 3              | 7                     | 385    | 44158 | 6.5 | H5 (Fragment)                                                                                                                                                      |
| 4071                     | Q59GE1           | 2                    | 3              | 6.9                   | 394    | 45220 | 6.7 | H5 variant (Fragment)                                                                                                                                              |
| 4071                     | Q99648           | 2                    | 3              | 6.5                   | 417    | 47622 | 7.4 | Septin (Fragment)                                                                                                                                                  |
| 4072                     | Q95571           | 2                    | 2              | 7.1                   | 254    | 27873 | 6.8 | Protein ETHE1, mitochondrial                                                                                                                                       |
| 4072                     | Q9DCM0           | 2                    | 2              | 7.1                   | 254    | 27739 | 7.2 | Protein ETHE1, mitochondrial                                                                                                                                       |
| 4073                     | UPI0001CB7927    | 2                    | 25             | 10.7                  | 224    | 25726 | 8.9 | nebulette isoform 3                                                                                                                                                |
| 4073                     | Q9DC07           | 2                    | 25             | 8.9                   | 270    | 31113 | 8.3 | Nebulette                                                                                                                                                          |
| 4073                     | Q70IS4           | 2                    | 25             | 8.9                   | 270    | 31196 | 8.3 | LIM-nebulette                                                                                                                                                      |
| 4073                     | Q59FZ8           | 2                    | 25             | 7                     | 345    | 38697 | 9   | Nebulette non-muscle isoform variant (Fragment)                                                                                                                    |
| 4074                     | E5RG71           | 2                    | 4              | 23.5                  | 85     | 9212  | 9.9 | Uncharacterized protein                                                                                                                                            |
| 4074                     | E9Q786           | 2                    | 4              | 22.5                  | 89     | 9653  | 10  | Uncharacterized protein                                                                                                                                            |
| 4074                     | Q8BJ85           | 2                    | 4              | 13.9                  | 144    | 15859 | 9.7 | Putative uncharacterized protein<br>cDNA FLJ37707 fis, clone BRHIP2017642, moderately similar to RNA-binding protein Raly                                          |
| 4074                     | B3KT61           | 2                    | 4              | 7.1                   | 280    | 31074 | 7.9 | cDNA FLJ37224 fis, clone BRAMY2000052, moderately similar to RNA-binding protein Raly                                                                              |
| 4074                     | B3KSX3           | 2                    | 4              | 6.9                   | 291    | 32347 | 7.9 | RNA-binding protein Raly                                                                                                                                           |
| 4074                     | Q86SE5           | 2                    | 4              | 6.9                   | 291    | 32331 | 7.9 | RNA-binding Raly-like protein                                                                                                                                      |
| 4074                     | Q8BTF8           | 2                    | 4              | 6.8                   | 293    | 32452 | 7.9 | RNA-binding Raly-like protein<br>cDNA FLJ52404, highly similar to sapiens related to CPSF subunits 74 kDa (RC74), mRNA                                             |
| 4075                     | B7Z970           | 2                    | 7              | 8                     | 552    | 62001 | 6.7 | cDNA FLJ53924, highly similar to sapiens related to CPSF subunits 74 kDa (RC74), mRNA                                                                              |
| 4075                     | B7Z6M5           | 2                    | 7              | 6.9                   | 637    | 71468 | 6.6 | Integrator complex subunit 9                                                                                                                                       |
| 4075                     | Q9NV88           | 2                    | 7              | 6.7                   | 658    | 73815 | 6.3 | Integrator complex subunit 9                                                                                                                                       |
| 4075                     | Q8K114           | 2                    | 7              | 6.7                   | 658    | 74078 | 6.4 | Integrator complex subunit 9                                                                                                                                       |
| 4076                     | Q8IUR7-6         | 2                    | 3              | 11.9                  | 385    | 42984 | 7.2 | Isoform 6 of Armadillo repeat-containing protein 8                                                                                                                 |
| 4076                     | UPI00006E0467    | 2                    | 3              | 11.5                  | 399    | 44499 | 7.2 | UPI00006E0467 UniRef100 entry                                                                                                                                      |
| 4076                     | Q9DBR3-2         | 2                    | 3              | 11.5                  | 399    | 44456 | 7.2 | Isoform 2 of Armadillo repeat-containing protein 8                                                                                                                 |
| 4076                     | Q8IUR7-2         | 2                    | 3              | 7                     | 659    | 73994 | 6.7 | Isoform 2 of Armadillo repeat-containing protein 8                                                                                                                 |
| 4076                     | A8MTG8           | 2                    | 3              | 6.8                   | 672    | 75471 | 6.9 | Uncharacterized protein                                                                                                                                            |
| 4076                     | UPI0000D63695    | 2                    | 3              | 6.8                   | 673    | 75402 | 6.7 | armadillo repeat-containing protein 8 isoform 1                                                                                                                    |
| 4076                     | Q9DBR3           | 2                    | 3              | 6.8                   | 673    | 75364 | 6.7 | Armadillo repeat-containing protein 8                                                                                                                              |
| 4076                     | Q8IUR7           | 2                    | 3              | 6.8                   | 673    | 75509 | 6.7 | Armadillo repeat-containing protein 8                                                                                                                              |
| 4077                     | B3KRK2           | 2                    | 2              | 6.7                   | 496    | 55410 | 8.2 | DEAD (Asp-Glu-Ala-Asp) box polypeptide 41, isoform CRA_a                                                                                                           |
| 4077                     | Q9LUJ9           | 2                    | 2              | 5.3                   | 622    | 69838 | 6.8 | Probable ATP-dependent RNA helicase DDX41                                                                                                                          |
| 4077                     | Q53HI2           | 2                    | 2              | 5.3                   | 622    | 69839 | 6.8 | DEAD-box protein abstract variant (Fragment)                                                                                                                       |
| 4077                     | Q3UAC4           | 2                    | 2              | 5.3                   | 622    | 69765 | 6.6 | Putative uncharacterized protein                                                                                                                                   |
| 4077                     | Q3U0E0           | 2                    | 2              | 5.3                   | 622    | 69820 | 6.7 | Putative uncharacterized protein<br>Probable ATP-dependent RNA helicase DDX41 (EC 3.6.1.-) (DEAD box protein 41) (DEAD box protein abstract log).                  |
| 4077                     | UPI0001D3BB5A    | 2                    | 2              | 5.2                   | 640    | 71649 | 7.5 | cDNA FLJ50950, highly similar to BAG family molecular chaperone regulator 4                                                                                        |
| 4078                     | B4E217           | 2                    | 2              | 6.7                   | 421    | 45410 | 5   | BAG family molecular chaperone regulator 4                                                                                                                         |
| 4078                     | Q8CI61           | 2                    | 2              | 6.1                   | 457    | 49095 | 5.3 | BAG family molecular chaperone regulator 4                                                                                                                         |
| 4078                     | O95429           | 2                    | 2              | 6.1                   | 457    | 49594 | 5.1 | BAG family molecular chaperone regulator 4                                                                                                                         |
| 4079                     | Q8BSR7           | 2                    | 2              | 9.6                   | 280    | 32522 | 6.9 | Putative uncharacterized protein (Fragment)                                                                                                                        |

Table S1. Proteins identified in the OVCAR-3 tumor supernatant by two or more unique peptides.

| Protein or Protein Group | Accession Number | Unique Peptide Count | Spectrum Count | Sequence Coverage (%) | Length | MolWt | pI  | Descriptive Name                                                                                                                |
|--------------------------|------------------|----------------------|----------------|-----------------------|--------|-------|-----|---------------------------------------------------------------------------------------------------------------------------------|
| 4079                     | O08586           | 2                    | 2              | 6.7                   | 403    | 47152 | 6.4 | Phosphatidylinositol-3,4,5-trisphosphate 3-phosphatase and dual-specificity protein phosphatase PTEN                            |
| 4079                     | P60484           | 2                    | 2              | 6.7                   | 403    | 47166 | 6.4 | Phosphatidylinositol-3,4,5-trisphosphate 3-phosphatase and dual-specificity protein phosphatase PTEN                            |
| 4079                     | O43460           | 2                    | 2              | 6.7                   | 403    | 47163 | 6.4 | Phosphatase and tensin log 2 (Fragment)                                                                                         |
| 4079                     | Q3UUN5           | 2                    | 2              | 6.6                   | 407    | 46893 | 6.8 | Putative uncharacterized protein                                                                                                |
| 4080                     | B4DE48           | 2                    | 2              | 6.6                   | 440    | 49755 | 8   | cDNA FLJ53824, highly similar to Sorting nexin-17                                                                               |
| 4080                     | B4DQ37           | 2                    | 2              | 6.4                   | 450    | 50836 | 8   | cDNA FLJ56223, highly similar to Sorting nexin-17                                                                               |
| 4080                     | Q8BVL3           | 2                    | 2              | 6.2                   | 470    | 52797 | 7.5 | Sorting nexin-17                                                                                                                |
| 4080                     | Q15036           | 2                    | 2              | 6.2                   | 470    | 52901 | 7.5 | Sorting nexin-17                                                                                                                |
| 4081                     | Q9UID7           | 2                    | 3              | 6.6                   | 334    | 37247 | 8.1 | CYR61 protein                                                                                                                   |
| 4081                     | B4DI61           | 2                    | 3              | 6.2                   | 357    | 39680 | 8.3 | cDNA FLJ58182, highly similar to Protein CYR61                                                                                  |
| 4081                     | E9PCE2           | 2                    | 3              | 6.1                   | 358    | 39783 | 8.3 | Uncharacterized protein                                                                                                         |
| 4081                     | Q53FA4           | 2                    | 3              | 5.8                   | 381    | 41995 | 8.3 | Cysteine-rich, angiogenic inducer, 61 variant (Fragment)                                                                        |
| 4081                     | P18406           | 2                    | 3              | 5.8                   | 379    | 41709 | 8.1 | Protein CYR61                                                                                                                   |
| 4081                     | O00622           | 2                    | 3              | 5.8                   | 381    | 42027 | 8.2 | Protein CYR61                                                                                                                   |
| 4082                     | B7Z3D0           | 2                    | 3              | 7.4                   | 352    | 40870 | 6.5 | cDNA FLJ60571, highly similar to Origin recognition complex subunit 4                                                           |
| 4082                     | B7Z2M4           | 2                    | 3              | 7.3                   | 357    | 41005 | 7.6 | cDNA FLJ60061, highly similar to Origin recognition complex subunit 4                                                           |
| 4082                     | A8K7H4           | 2                    | 3              | 6                     | 436    | 50393 | 8   | cDNA FLJ75764, highly similar to sapiens origin recognition complex, subunit 4-like (yeast) (ORC4L), transcript variant 2, mRNA |
| 4082                     | O88708           | 2                    | 3              | 6                     | 433    | 49982 | 7.3 | Origin recognition complex subunit 4                                                                                            |
| 4082                     | O43929           | 2                    | 3              | 6                     | 436    | 50377 | 8   | Origin recognition complex subunit 4                                                                                            |
| 4083                     | E7EP30           | 2                    | 6              | 6                     | 695    | 78983 | 5.2 | Uncharacterized protein                                                                                                         |
| 4083                     | Q8N8L9           | 2                    | 6              | 6                     | 695    | 78969 | 5.2 | cDNA FLJ39238 fis, clone OCBBF2007946                                                                                           |
| 4083                     | UPI000059D3B1    | 2                    | 6              | 5.5                   | 768    | 87184 | 5.2 | conserved oligomeric Golgi complex subunit 4 isoform 2                                                                          |
| 4083                     | Q6PIW8           | 2                    | 6              | 5.5                   | 763    | 86647 | 5.2 | COG4 protein (Fragment)                                                                                                         |
| 4083                     | Q9H9E3           | 2                    | 6              | 5.4                   | 785    | 89083 | 5.2 | Conserved oligomeric Golgi complex subunit 4                                                                                    |
| 4083                     | Q8R1U1           | 2                    | 6              | 5.4                   | 785    | 88661 | 5.1 | Conserved oligomeric Golgi complex subunit 4                                                                                    |
| 4084                     | Q9H999           | 2                    | 2              | 7                     | 370    | 41094 | 6.6 | Pantothenate kinase 3                                                                                                           |
| 4084                     | Q8R2W9           | 2                    | 2              | 7                     | 370    | 41120 | 6.6 | Pantothenate kinase 3                                                                                                           |
| 4084                     | Q7M752           | 2                    | 2              | 7                     | 370    | 41106 | 6.6 | Pantothenate kinase 3                                                                                                           |
| 4084                     | Q3UWJ1           | 2                    | 2              | 6                     | 430    | 48239 | 7.4 | Putative uncharacterized protein                                                                                                |
| 4085                     | Q99LE7           | 2                    | 2              | 9.3                   | 378    | 41782 | 7.5 | Pxn protein (Fragment)                                                                                                          |
| 4085                     | Q6ZQU7           | 2                    | 2              | 8.7                   | 403    | 44524 | 7.3 | cDNA FLJ46879 fis, clone UTERU3015011, highly similar to Paxillin                                                               |
| 4085                     | E7EMK8           | 2                    | 2              | 8.7                   | 403    | 44524 | 7.5 | Uncharacterized protein                                                                                                         |
| 4085                     | P49023-4         | 2                    | 2              | 8.3                   | 424    | 46604 | 7.1 | Isoform 4 of Paxillin                                                                                                           |
| 4085                     | Q8VI36-2         | 2                    | 2              | 6.3                   | 557    | 60812 | 6.3 | Isoform Alpha of Paxillin                                                                                                       |
| 4085                     | Q3UG90           | 2                    | 2              | 6.3                   | 557    | 60906 | 6.3 | Putative uncharacterized protein                                                                                                |
| 4085                     | P49023-2         | 2                    | 2              | 6.3                   | 557    | 60967 | 6.4 | Isoform Alpha of Paxillin                                                                                                       |
| 4085                     | B3KVL0           | 2                    | 2              | 5.9                   | 589    | 64159 | 6.4 | cDNA FLJ16691 fis, clone TRACH3000692, highly similar to Paxillin                                                               |
| 4085                     | UPI0000D77AD6    | 2                    | 2              | 5.9                   | 591    | 64506 | 6   | paxillin isoform beta                                                                                                           |
| 4085                     | Q8VI36           | 2                    | 2              | 5.9                   | 591    | 64476 | 6   | Paxillin                                                                                                                        |
| 4085                     | P49023           | 2                    | 2              | 5.9                   | 591    | 64505 | 6.2 | Paxillin                                                                                                                        |
| 4085                     | B7ZMB4           | 2                    | 2              | 5.9                   | 591    | 64475 | 6.2 | Paxillin                                                                                                                        |
| 4085                     | P49023-3         | 2                    | 2              | 5.8                   | 605    | 66213 | 6.4 | Isoform Gamma of Paxillin                                                                                                       |
| 4086                     | E9PF31           | 2                    | 3              | 6.9                   | 422    | 46137 | 6.3 | Uncharacterized protein                                                                                                         |
| 4086                     | Q94788-2         | 2                    | 3              | 6                     | 480    | 53060 | 6.1 | Isoform 2 of Retinal dehydrogenase 2                                                                                            |
| 4086                     | B4DH89           | 2                    | 3              | 5.9                   | 489    | 53791 | 6.1 | cDNA FLJ55560, highly similar to Retinal dehydrogenase 2 (EC 1.2.1.36)                                                          |
| 4086                     | B4DZR2           | 2                    | 3              | 5.8                   | 497    | 54639 | 6.6 | cDNA FLJ59801, highly similar to Retinal dehydrogenase 2 (EC 1.2.1.36)                                                          |
| 4086                     | Q62148           | 2                    | 3              | 5.6                   | 518    | 56626 | 5.7 | Retinal dehydrogenase 2                                                                                                         |
| 4086                     | Q94788           | 2                    | 3              | 5.6                   | 518    | 56724 | 6   | Retinal dehydrogenase 2                                                                                                         |
| 4087                     | C9JJA4           | 2                    | 3              | 5.9                   | 407    | 46043 | 5.8 | Uncharacterized protein                                                                                                         |
| 4087                     | Q8TAF3-4         | 2                    | 3              | 4                     | 595    | 66707 | 6.5 | Isoform 4 of WD repeat-containing protein 48                                                                                    |
| 4087                     | Q8TAF3-3         | 2                    | 3              | 3.6                   | 668    | 75349 | 7.1 | Isoform 3 of WD repeat-containing protein 48                                                                                    |
| 4087                     | Q8BH57-2         | 2                    | 3              | 3.6                   | 662    | 74401 | 7.2 | Isoform 2 of WD repeat-containing protein 48                                                                                    |
| 4087                     | Q8BH57           | 2                    | 3              | 3.6                   | 676    | 76007 | 7.2 | WD repeat-containing protein 48                                                                                                 |
| 4087                     | Q8TAF3           | 2                    | 3              | 3.5                   | 677    | 76211 | 7   | WD repeat-containing protein 48                                                                                                 |
| 4088                     | P55081           | 2                    | 2              | 5.9                   | 439    | 51958 | 5   | Microfibrillar-associated protein 1                                                                                             |
| 4088                     | Q9CQU1           | 2                    | 2              | 5.9                   | 439    | 51954 | 5   | Microfibrillar-associated protein 1                                                                                             |
| 4089                     | D3YU58           | 2                    | 4              | 6.6                   | 503    | 56168 | 8.5 | Uncharacterized protein                                                                                                         |
| 4089                     | B3KMP2           | 2                    | 4              | 6.6                   | 503    | 56314 | 8.5 | cDNA FLJ11747 fis, clone HEMBA1005530, highly similar to Anaphase-promoting complex subunit 7                                   |
| 4089                     | UPI0001B790E7    | 2                    | 4              | 6.2                   | 530    | 59345 | 8.6 | UPI001B790E7 UniRef100 entry                                                                                                    |
| 4089                     | Q9UJX3-2         | 2                    | 4              | 6.1                   | 537    | 60002 | 8.4 | Isoform 2 of Anaphase-promoting complex subunit 7                                                                               |
| 4089                     | A5D8X2           | 2                    | 4              | 5.8                   | 565    | 63115 | 5.7 | Anaphase promoting complex subunit 7                                                                                            |
| 4089                     | Q9WVM3           | 2                    | 4              | 5.8                   | 565    | 63021 | 5.7 | Anaphase-promoting complex subunit 7                                                                                            |
| 4089                     | Q9UJX3           | 2                    | 4              | 5.5                   | 599    | 66856 | 5.6 | Anaphase-promoting complex subunit 7                                                                                            |
| 4090                     | B4DTT5           | 2                    | 4              | 6.6                   | 273    | 31228 | 5.6 | cDNA FLJ50214, highly similar to Follistatin-related protein 1                                                                  |
| 4090                     | Q6GTX2           | 2                    | 4              | 5.9                   | 306    | 34554 | 5.8 | Follistatin-like 1                                                                                                              |
| 4090                     | Q62356           | 2                    | 4              | 5.9                   | 306    | 34538 | 6   | Follistatin-related protein 1                                                                                                   |
| 4090                     | A8K523           | 2                    | 4              | 5.8                   | 308    | 34909 | 5.5 | cDNA FLJ78447, highly similar to sapiens follistatin-like 1 (FSTL1), mRNA                                                       |
| 4090                     | Q12841           | 2                    | 4              | 5.8                   | 308    | 34985 | 5.5 | Follistatin-related protein 1                                                                                                   |
| 4091                     | Q96B13           | 2                    | 7              | 6.8                   | 384    | 44878 | 6.5 | Protein phosphatase 2, regulatory subunit B', gamma isoform                                                                     |
| 4091                     | B4DYJ8           | 2                    | 7              | 5.8                   | 449    | 52650 | 6.7 | cDNA FLJ57234, highly similar to Serine/threonine-protein phosphatase 2A 56 kDa regulatory subunit gamma isoform                |
| 4091                     | Q60996-2         | 2                    | 7              | 5.8                   | 452    | 52818 | 7   | Isoform 1 of Serine/threonine-protein phosphatase 2A 56 kDa regulatory subunit gamma isoform                                    |
| 4091                     | Q13362-2         | 2                    | 7              | 5.8                   | 449    | 52625 | 7.2 | Isoform Gamma-1 of Serine/threonine-protein phosphatase 2A 56 kDa regulatory subunit gamma isoform                              |
| 4091                     | Q6ZQK4           | 2                    | 7              | 5.7                   | 458    | 53017 | 9   | MKIAA0044 protein (Fragment)                                                                                                    |
| 4091                     | Q96L52           | 2                    | 7              | 5.5                   | 475    | 55556 | 6.8 | PP2A B56 gamma 2                                                                                                                |
| 4091                     | Q60996-3         | 2                    | 7              | 5.4                   | 485    | 56552 | 7   | Isoform 3 of Serine/threonine-protein phosphatase 2A 56 kDa regulatory subunit gamma isoform                                    |
| 4091                     | Q13362-3         | 2                    | 7              | 5.4                   | 485    | 56661 | 7.2 | Isoform Gamma-2 of Serine/threonine-protein phosphatase 2A 56 kDa regulatory subunit gamma isoform                              |
| 4091                     | Q60996-4         | 2                    | 7              | 5.2                   | 496    | 57517 | 6.8 | Isoform 4 of Serine/threonine-protein phosphatase 2A 56 kDa regulatory subunit gamma isoform                                    |
| 4091                     | UPI00001E77E5    | 2                    | 7              | 5.1                   | 509    | 59365 | 8.7 | serine/threonine-protein phosphatase 2A 56 kDa regulatory subunit gamma isoform isoform d                                       |
| 4091                     | Q7L7W2           | 2                    | 7              | 5.1                   | 514    | 59956 | 6.6 | PP2A B56 gamma 3                                                                                                                |
| 4091                     | Q60996           | 2                    | 7              | 5                     | 524    | 60825 | 6.6 | Serine/threonine-protein phosphatase 2A 56 kDa regulatory subunit gamma isoform                                                 |
| 4091                     | Q13362           | 2                    | 7              | 5                     | 524    | 61061 | 6.9 | Serine/threonine-protein phosphatase 2A 56 kDa regulatory subunit gamma isoform                                                 |

Table S1. Proteins identified in the OVCAR-3 tumor supernatant by two or more unique peptides.

| Protein or Protein Group | Accession Number | Unique Peptide Count | Spectrum Count | Sequence Coverage (%) | Length | MolWt  | pI  | Descriptive Name                                                                                                                                                           |
|--------------------------|------------------|----------------------|----------------|-----------------------|--------|--------|-----|----------------------------------------------------------------------------------------------------------------------------------------------------------------------------|
| 4091                     | Q6ZN33           | 2                    | 7              | 4.8                   | 540    | 62755  | 8.7 | cDNA FLJ16473 fis, clone BRHIP3026052, highly similar to Serine/threonine protein phosphatase 2A, 56 kDa regulatory subunit, gamma isoform                                 |
| 4091                     | UPI0001A7AE62    | 2                    | 7              | 4.7                   | 555    | 64292  | 6.7 | serine/threonine-protein phosphatase 2A 56 kDa regulatory subunit gamma isoform isoform e                                                                                  |
| 4092                     | E7EV65           | 2                    | 4              | 6.5                   | 307    | 34407  | 9.1 | Uncharacterized protein                                                                                                                                                    |
| 4092                     | A4FUP2           | 2                    | 4              | 5.6                   | 357    | 40000  | 8.3 | TEAD1 protein                                                                                                                                                              |
| 4092                     | E9QAK6           | 2                    | 4              | 5.6                   | 357    | 40002  | 8.3 | Uncharacterized protein                                                                                                                                                    |
| 4092                     | UPI0001F784CD    | 2                    | 4              | 5.4                   | 368    | 41140  | 7.7 | UPI0001F784CD UniRef100 entry                                                                                                                                              |
| 4092                     | Q59EF3           | 2                    | 4              | 5.4                   | 371    | 41580  | 7.8 | TEA domain family member 1 variant (Fragment)                                                                                                                              |
| 4092                     | E9Q387           | 2                    | 4              | 5.1                   | 390    | 43896  | 7.8 | Uncharacterized protein                                                                                                                                                    |
| 4092                     | E9PVS2           | 2                    | 4              | 5.1                   | 394    | 44315  | 7.8 | Uncharacterized protein                                                                                                                                                    |
| 4092                     | Q3UFP5           | 2                    | 4              | 4.8                   | 415    | 46789  | 8.6 | Putative uncharacterized protein                                                                                                                                           |
| 4092                     | E9Q681           | 2                    | 4              | 4.8                   | 415    | 46791  | 8.5 | Uncharacterized protein                                                                                                                                                    |
| 4092                     | E9PZ73           | 2                    | 4              | 4.8                   | 415    | 46671  | 8.4 | Uncharacterized protein                                                                                                                                                    |
| 4092                     | UPI000013D412    | 2                    | 4              | 4.7                   | 426    | 47928  | 8.1 | UPI000013D412 UniRef100 entry                                                                                                                                              |
| 4092                     | P30051           | 2                    | 4              | 4.7                   | 426    | 47948  | 8.1 | Transcriptional enhancer factor TEF-1                                                                                                                                      |
| 4092                     | P28347           | 2                    | 4              | 4.7                   | 426    | 47946  | 8.1 | Transcriptional enhancer factor TEF-1                                                                                                                                      |
| 4092                     | Q3USK5           | 2                    | 4              | 4.6                   | 436    | 49146  | 9   | Putative uncharacterized protein                                                                                                                                           |
| 4092                     | E9Q0H2           | 2                    | 4              | 4.6                   | 436    | 49148  | 8.9 | Uncharacterized protein                                                                                                                                                    |
| 4093                     | Q9UBB9-2         | 2                    | 4              | 14.8                  | 196    | 22431  | 6.5 | Isoform 2 of Tuftelin-interacting protein 11                                                                                                                               |
| 4093                     | E9PHU6           | 2                    | 4              | 6.4                   | 455    | 52765  | 5.3 | Uncharacterized protein                                                                                                                                                    |
| 4093                     | B4DSX8           | 2                    | 4              | 6.4                   | 454    | 52631  | 5.3 | cDNA FLJ57193, highly similar to Tuftelin-interacting protein 11                                                                                                           |
| 4093                     | B4DPE5           | 2                    | 4              | 5.6                   | 522    | 61273  | 5.2 | cDNA FLJ58206, highly similar to Tuftelin-interacting protein 11                                                                                                           |
| 4093                     | E7EMD1           | 2                    | 4              | 5.6                   | 522    | 61287  | 5.2 | Uncharacterized protein                                                                                                                                                    |
| 4093                     | Q9UBB9           | 2                    | 4              | 3.5                   | 837    | 96820  | 5.7 | Tuftelin-interacting protein 11                                                                                                                                            |
| 4093                     | Q9ERA6           | 2                    | 4              | 3.5                   | 838    | 96305  | 5.9 | Tuftelin-interacting protein 11                                                                                                                                            |
| 4093                     | Q8N523           | 2                    | 4              | 3.5                   | 837    | 96794  | 5.7 | Tuftelin interacting protein 11                                                                                                                                            |
| 4093                     | Q3UGE9           | 2                    | 4              | 3.5                   | 838    | 96335  | 6   | Putative uncharacterized protein                                                                                                                                           |
| 4094                     | Q9D1P2-2         | 2                    | 5              | 12.9                  | 194    | 21398  | 7.6 | Isoform 2 of Probable histone acetyltransferase MYST1                                                                                                                      |
| 4094                     | Q3V268           | 2                    | 5              | 5.5                   | 458    | 52604  | 8.4 | Putative uncharacterized protein                                                                                                                                           |
| 4094                     | Q9H7Z6           | 2                    | 5              | 5.5                   | 458    | 52403  | 8.3 | Probable histone acetyltransferase MYST1                                                                                                                                   |
| 4094                     | Q9D1P2           | 2                    | 5              | 5.5                   | 458    | 52574  | 8.4 | Probable histone acetyltransferase MYST1                                                                                                                                   |
| 4094                     | UPI00001B02B6    | 2                    | 5              | 5.4                   | 467    | 53085  | 8   | probable histone acetyltransferase MYST1 isoform 2                                                                                                                         |
| 4094                     | Q9H7Z6-2         | 2                    | 5              | 5.4                   | 467    | 53103  | 8   | Isoform 2 of Probable histone acetyltransferase MYST1                                                                                                                      |
| 4095                     | Q6ZMK1-2         | 2                    | 2              | 8                     | 274    | 31760  | 7.7 | Isoform 2 of Cysteine and histidine-rich protein 1                                                                                                                         |
| 4095                     | Q9QXA1           | 2                    | 2              | 7.1                   | 311    | 35757  | 7.7 | Cysteine and histidine-rich protein 1                                                                                                                                      |
| 4095                     | Q6ZMK1           | 2                    | 2              | 6.1                   | 362    | 40703  | 7.2 | Cysteine and histidine-rich protein 1                                                                                                                                      |
| 4095                     | E9PJD7           | 2                    | 2              | 5.4                   | 404    | 43813  | 6.8 | Uncharacterized protein                                                                                                                                                    |
| 4096                     | D3Z1E6           | 2                    | 2              | 18.6                  | 145    | 16405  | 9   | Uncharacterized protein                                                                                                                                                    |
| 4096                     | E9Q162           | 2                    | 2              | 7.1                   | 381    | 43434  | 8.5 | Uncharacterized protein                                                                                                                                                    |
| 4096                     | A0AV88           | 2                    | 2              | 5.3                   | 512    | 57897  | 7.2 | ADAM10 protein                                                                                                                                                             |
| 4096                     | E9PYF2           | 2                    | 2              | 5.3                   | 513    | 57792  | 7.4 | Uncharacterized protein                                                                                                                                                    |
| 4096                     | A8MY20           | 2                    | 2              | 4.8                   | 567    | 63152  | 7.9 | ADAM metalloproteinase domain 10, isoform CRA_a                                                                                                                            |
| 4096                     | UPI00015DFCDA    | 2                    | 2              | 3.6                   | 747    | 84075  | 7.8 | ADAM 10 precursor (EC 3.4.24.81) (A disintegrin and metalloproteinase domain 10) (Mammalian disintegrin-metalloprotease) (Kuzbanian protein log) (CD156c antigen) (CDw156) |
| 4096                     | O35598           | 2                    | 2              | 3.6                   | 749    | 83967  | 8   | Disintegrin and metalloproteinase domain-containing protein 10                                                                                                             |
| 4096                     | O14672           | 2                    | 2              | 3.6                   | 748    | 84142  | 7.8 | Disintegrin and metalloproteinase domain-containing protein 10                                                                                                             |
| 4096                     | B8JJJ0           | 2                    | 2              | 3.6                   | 749    | 83968  | 7.9 | A disintegrin and metalloproteinase domain 10                                                                                                                              |
| 4097                     | B4DPV9           | 2                    | 5              | 5.7                   | 824    | 94399  | 6.7 | cDNA FLJ55742, highly similar to Phosphatidylinositol 3-kinase catalytic subunit type 3 (EC 2.7.1.137)                                                                     |
| 4097                     | A8MYT4           | 2                    | 5              | 5.3                   | 888    | 101713 | 6.8 | Uncharacterized protein                                                                                                                                                    |
| 4097                     | Q8NEB9           | 2                    | 5              | 5.3                   | 887    | 101549 | 6.8 | Phosphatidylinositol 3-kinase catalytic subunit type 3                                                                                                                     |
| 4097                     | Q6PF93           | 2                    | 5              | 5.3                   | 887    | 101487 | 6.7 | Phosphatidylinositol 3-kinase catalytic subunit type 3                                                                                                                     |
| 4098                     | Q9HSS5           | 2                    | 3              | 11.7                  | 179    | 21021  | 7.9 | CYTH3 protein                                                                                                                                                              |
| 4098                     | B7Z2V9           | 2                    | 3              | 6.7                   | 314    | 36793  | 8.6 | cDNA FLJ56345, highly similar to Cytohesin-3                                                                                                                               |
| 4098                     | B2R9C3           | 2                    | 3              | 5.3                   | 399    | 46288  | 5.5 | cDNA, FLJ94328, highly similar to sapiens pleckstrin logy, Sec7 and coiled-coil domains 3 (PSCD3), mRNA                                                                    |
| 4098                     | Q3TGW1           | 2                    | 3              | 5.3                   | 399    | 46181  | 5.5 | Putative uncharacterized protein                                                                                                                                           |
| 4098                     | Q43739-2         | 2                    | 3              | 5.3                   | 399    | 46292  | 5.5 | Isoform 2 of Cytohesin-3                                                                                                                                                   |
| 4098                     | O08967           | 2                    | 3              | 5.3                   | 399    | 46280  | 5.5 | Cytohesin-3                                                                                                                                                                |
| 4098                     | P97696           | 2                    | 3              | 5.2                   | 400    | 46337  | 5.5 | Cytohesin-3                                                                                                                                                                |
| 4098                     | O43739           | 2                    | 3              | 5.2                   | 400    | 46349  | 5.5 | Cytohesin-3                                                                                                                                                                |
| 4098                     | UPI0001F78FB4    | 2                    | 3              | 4.6                   | 453    | 51949  | 7.7 | pleckstrin logy, Sec7 and coiled-coil domains 3                                                                                                                            |
| 4099                     | P52655           | 2                    | 5              | 5.3                   | 376    | 41514  | 4.5 | Transcription initiation factor IIA subunit 1                                                                                                                              |
| 4099                     | Q99PM3           | 2                    | 5              | 5.3                   | 378    | 41614  | 4.5 | Transcription initiation factor IIA subunit 1                                                                                                                              |
| 4099                     | Q0VGZ0           | 2                    | 5              | 5.3                   | 378    | 41598  | 4.6 | Gtf2a1 protein                                                                                                                                                             |
| 4100                     | UPI00000372D7    | 2                    | 2              | 6.4                   | 393    | 43056  | 7.6 | WD repeat-containing protein 13 isoform 2                                                                                                                                  |
| 4100                     | Q06DX0           | 2                    | 2              | 6.4                   | 393    | 43056  | 7.6 | WDR13                                                                                                                                                                      |
| 4100                     | Q06DW8           | 2                    | 2              | 6.4                   | 393    | 43056  | 7.6 | WDR13                                                                                                                                                                      |
| 4100                     | B2RBN3           | 2                    | 2              | 5.2                   | 485    | 53636  | 9.1 | cDNA, FLJ95601, highly similar to sapiens WD repeat domain 13 (WDR13), mRNA                                                                                                |
| 4100                     | Q91V09           | 2                    | 2              | 5.2                   | 485    | 53664  | 9.1 | WD repeat-containing protein 13                                                                                                                                            |
| 4100                     | Q8K412           | 2                    | 2              | 5.2                   | 485    | 53680  | 9.1 | Memory-related protein                                                                                                                                                     |
| 4100                     | Q6NXG4           | 2                    | 2              | 4.7                   | 535    | 58715  | 9.2 | WDR13 protein (Fragment)                                                                                                                                                   |
| 4101                     | B4DRU9           | 2                    | 2              | 5.1                   | 668    | 75574  | 7.2 | cDNA FLJ57179, highly similar to sapiens ATP-binding cassette, sub-family F (GCN20), member 3 (ABCF3), mRNA                                                                |
| 4101                     | Q9NUQ8-2         | 2                    | 2              | 4.8                   | 703    | 78984  | 6.2 | Isoform 2 of ATP-binding cassette sub-family F member 3                                                                                                                    |
| 4101                     | Q9NUQ8           | 2                    | 2              | 4.8                   | 709    | 79745  | 6.3 | ATP-binding cassette sub-family F member 3                                                                                                                                 |
| 4101                     | Q8K268           | 2                    | 2              | 4.8                   | 709    | 79865  | 6.2 | ATP-binding cassette sub-family F member 3                                                                                                                                 |
| 4102                     | UPI000198CA16    | 2                    | 5              | 13.8                  | 240    | 26339  | 8.2 | Peptide-N(4)-(N-acetyl-beta-glucosaminy)asparagine amidase (EC 3.5.1.52) (PNGase) (hPNGase) (Peptide:N-glycanase) (N-glycanase 1).                                         |
| 4102                     | Q96IV0-3         | 2                    | 5              | 5.9                   | 558    | 63828  | 8.1 | Isoform 3 of Peptide-N(4)-(N-acetyl-beta-glucosaminy)asparagine amidase                                                                                                    |
| 4102                     | Q96IV0-2         | 2                    | 5              | 5.2                   | 636    | 72285  | 8.1 | Isoform 2 of Peptide-N(4)-(N-acetyl-beta-glucosaminy)asparagine amidase                                                                                                    |
| 4102                     | Q9JI78           | 2                    | 5              | 5.1                   | 651    | 74275  | 6.9 | Peptide-N(4)-(N-acetyl-beta-glucosaminy)asparagine amidase                                                                                                                 |
| 4102                     | Q96IV0           | 2                    | 5              | 5                     | 654    | 74390  | 6.9 | Peptide-N(4)-(N-acetyl-beta-glucosaminy)asparagine amidase                                                                                                                 |
| 4103                     | B1ARR0           | 2                    | 4              | 4.6                   | 604    | 67810  | 8.8 | Netrin 1                                                                                                                                                                   |
| 4103                     | Q95631           | 2                    | 4              | 4.6                   | 604    | 67748  | 8.8 | Netrin-1                                                                                                                                                                   |
| 4103                     | O09118           | 2                    | 4              | 4.6                   | 604    | 67768  | 8.8 | Netrin-1                                                                                                                                                                   |
| 4104                     | B4E192           | 2                    | 164            | 4.7                   | 407    | 47336  | 5.3 | cDNA FLJ54224, highly similar to Glial fibrillary acidic protein, astrocyte                                                                                                |
| 4104                     | B4DJW0           | 2                    | 164            | 4.6                   | 415    | 48200  | 5.5 | cDNA FLJ55696, highly similar to Glial fibrillary acidic protein, astrocyte                                                                                                |
| 4104                     | P14136-3         | 2                    | 164            | 4.4                   | 431    | 49506  | 6.1 | Isoform 3 of Glial fibrillary acidic protein                                                                                                                               |
| 4104                     | P14136           | 2                    | 164            | 4.4                   | 432    | 49880  | 5.5 | Glial fibrillary acidic protein                                                                                                                                            |
| 4104                     | P03995-2         | 2                    | 164            | 4.4                   | 428    | 49365  | 5.5 | Isoform 2 of Glial fibrillary acidic protein                                                                                                                               |
| 4104                     | P03995           | 2                    | 164            | 4.4                   | 430    | 49900  | 5.3 | Glial fibrillary acidic protein                                                                                                                                            |
| 4104                     | E9PAX3           | 2                    | 164            | 4.4                   | 431    | 49508  | 6.1 | Uncharacterized protein                                                                                                                                                    |

Table S1. Proteins identified in the OVCAR-3 tumor supernatant by two or more unique peptides.

| Protein or Group | Accession Number | Unique Peptide Count | Spectrum Count | Sequence Coverage (%) | Length | MolWt  | pI  | Descriptive Name                                                                                                               |
|------------------|------------------|----------------------|----------------|-----------------------|--------|--------|-----|--------------------------------------------------------------------------------------------------------------------------------|
| 4104             | P14136-2         | 2                    | 164            | 4.3                   | 438    | 50289  | 5.7 | Isoform 2 of Glial fibrillary acidic protein                                                                                   |
| 4105             | Q5SRX1-5         | 2                    | 8              | 7.7                   | 286    | 31789  | 5.2 | Isoform 5 of TOM1-like protein 2                                                                                               |
| 4105             | Q5SRX1-3         | 2                    | 8              | 5                     | 440    | 48408  | 5.1 | Isoform 3 of TOM1-like protein 2                                                                                               |
| 4105             | Q5SRX1-4         | 2                    | 8              | 4.9                   | 450    | 49439  | 5.1 | Isoform 4 of TOM1-like protein 2                                                                                               |
| 4105             | B7Z2L7           | 2                    | 8              | 4.6                   | 483    | 53368  | 4.8 | cDNA FLJ60511, highly similar to Mus musculus target of myb1-like 2 (chicken) (Tom1l2), transcript variant 1, mRNA             |
| 4105             | Q5SRX1-2         | 2                    | 8              | 4.5                   | 487    | 53383  | 4.9 | Isoform 2 of TOM1-like protein 2                                                                                               |
| 4105             | Q6ZVM7           | 2                    | 8              | 4.3                   | 507    | 55556  | 4.8 | TOM1-like protein 2                                                                                                            |
| 4105             | Q5SRX1           | 2                    | 8              | 4.3                   | 507    | 55663  | 4.8 | TOM1-like protein 2                                                                                                            |
| 4106             | Q9NXS9           | 2                    | 5              | 7.1                   | 424    | 47994  | 6.9 | CDNA FLJ20071 fis, clone COL01887                                                                                              |
| 4106             | Q7RTS9-2         | 2                    | 5              | 6.3                   | 479    | 54425  | 5.8 | Isoform 2 of Dymeclin                                                                                                          |
| 4106             | Q7RTS9           | 2                    | 5              | 4.5                   | 669    | 75936  | 5.9 | Dymeclin                                                                                                                       |
| 4106             | Q8CHY3           | 2                    | 5              | 4.5                   | 669    | 75848  | 5.8 | Dymeclin                                                                                                                       |
| 4107             | B4DF77           | 2                    | 3              | 4.4                   | 499    | 54461  | 9.1 | cDNA FLJ58767, highly similar to Phosphofurin acidic cluster sorting protein 1                                                 |
| 4107             | Q8K212           | 2                    | 3              | 2.3                   | 961    | 104829 | 7.7 | Phosphofurin acidic cluster sorting protein 1                                                                                  |
| 4107             | Q6VY07           | 2                    | 3              | 2.3                   | 963    | 104898 | 7.7 | Phosphofurin acidic cluster sorting protein 1                                                                                  |
| 4107             | Q6VY07-2         | 2                    | 3              | 2.2                   | 1008   | 109342 | 7.4 | Isoform 2 of Phosphofurin acidic cluster sorting protein 1                                                                     |
| 4108             | Q9JK48           | 2                    | 2              | 4.4                   | 365    | 40855  | 6   | Endophilin-B1                                                                                                                  |
| 4108             | Q9Y371           | 2                    | 2              | 4.4                   | 365    | 40796  | 6   | Endophilin-B1                                                                                                                  |
| 4108             | Q9Y371-2         | 2                    | 2              | 4.1                   | 386    | 43196  | 5.7 | Isoform 2 of Endophilin-B1                                                                                                     |
| 4108             | Q9JK48-2         | 2                    | 2              | 4.1                   | 386    | 43239  | 5.7 | Isoform 2 of Endophilin-B1                                                                                                     |
| 4109             | B3KXT2           | 2                    | 3              | 4.3                   | 650    | 72236  | 5.7 | cDNA FLJ45998 fis, clone SMINT2009292, highly similar to sapiens NMDA receptor regulated 2 (NARG2), transcript variant 1, mRNA |
| 4109             | Q659A1           | 2                    | 3              | 2.9                   | 982    | 110011 | 7.1 | NMDA receptor-regulated protein 2                                                                                              |
| 4109             | Q3UZ18           | 2                    | 3              | 2.8                   | 988    | 109879 | 6.8 | NMDA receptor-regulated protein 2                                                                                              |
| 4110             | B3KY61           | 2                    | 5              | 4.3                   | 793    | 88802  | 9.4 | cDNA FLJ16787 fis, clone PLACE6013222, weakly similar to Mus musculus RNA binding motif protein 26 (Rbm26), mRNA (Fragment)    |
| 4110             | Q5SFM8-2         | 2                    | 5              | 3.4                   | 1005   | 112715 | 9.1 | Isoform 2 of RNA-binding protein 27                                                                                            |
| 4110             | E9QM05           | 2                    | 5              | 3.4                   | 1005   | 112705 | 9.1 | Uncharacterized protein                                                                                                        |
| 4110             | Q9P2N5           | 2                    | 5              | 3.2                   | 1060   | 118718 | 9.2 | RNA-binding protein 27                                                                                                         |
| 4110             | Q5SFM8           | 2                    | 5              | 3.2                   | 1060   | 118561 | 9.2 | RNA-binding protein 27                                                                                                         |
| 4110             | E9QM85           | 2                    | 5              | 3.2                   | 1060   | 118551 | 9.2 | Uncharacterized protein                                                                                                        |
| 4111             | UPI00000EA81A    | 2                    | 4              | 5                     | 579    | 64194  | 4.7 | UPI00000EA81A UniRef100 entry                                                                                                  |
| 4111             | E9PB39           | 2                    | 4              | 4.8                   | 610    | 68223  | 4.7 | Uncharacterized protein                                                                                                        |
| 4111             | C9JE94           | 2                    | 4              | 4.3                   | 679    | 77512  | 6.3 | Uncharacterized protein                                                                                                        |
| 4111             | UPI0001DD33FA    | 2                    | 4              | 2.9                   | 988    | 109407 | 8   | UPI0001DD33FA UniRef100 entry                                                                                                  |
| 4111             | UPI00001AE820    | 2                    | 4              | 2.9                   | 988    | 109653 | 8   | UPI00001AE820 UniRef100 entry                                                                                                  |
| 4111             | Q8C033-2         | 2                    | 4              | 2.2                   | 1306   | 143451 | 5.6 | Isoform 2 of Rho guanine nucleotide exchange factor 10                                                                         |
| 4111             | Q8C033           | 2                    | 4              | 2.2                   | 1345   | 147945 | 5.7 | Rho guanine nucleotide exchange factor 10                                                                                      |
| 4111             | Q3UGZ6           | 2                    | 4              | 2.2                   | 1345   | 147944 | 5.8 | Putative uncharacterized protein                                                                                               |
| 4111             | O15013-7         | 2                    | 4              | 2.2                   | 1306   | 144269 | 5.4 | Isoform 3 of Rho guanine nucleotide exchange factor 10                                                                         |
| 4111             | O15013-5         | 2                    | 4              | 2.2                   | 1344   | 148869 | 5.6 | Isoform 5 of Rho guanine nucleotide exchange factor 10                                                                         |
| 4111             | O15013-4         | 2                    | 4              | 2.2                   | 1340   | 148328 | 5.8 | Isoform 4 of Rho guanine nucleotide exchange factor 10                                                                         |
| 4111             | O15013-6         | 2                    | 4              | 2.1                   | 1368   | 151483 | 5.7 | Isoform 2 of Rho guanine nucleotide exchange factor 10                                                                         |
| 4111             | O15013           | 2                    | 4              | 2.1                   | 1369   | 151611 | 5.7 | Rho guanine nucleotide exchange factor 10                                                                                      |
| 4112             | Q86SW5           | 2                    | 2              | 8.7                   | 242    | 27093  | 8.6 | Full-length cDNA 5-PRIME end of clone CS00L002Y106 of B cells (Ramos cell line) of sapiens (human) (Fragment)                  |
| 4112             | Q05BE7           | 2                    | 2              | 6.5                   | 322    | 36186  | 9.5 | Numb protein                                                                                                                   |
| 4112             | B1P2N8           | 2                    | 2              | 4.7                   | 445    | 48825  | 8.4 | Numb isoform 8                                                                                                                 |
| 4112             | B1P2N7           | 2                    | 2              | 4.6                   | 456    | 50198  | 8.7 | Numb isoform 7                                                                                                                 |
| 4112             | B1P2N6           | 2                    | 2              | 4.3                   | 494    | 53947  | 7.6 | Numb isoform 6                                                                                                                 |
| 4112             | B1P2N5           | 2                    | 2              | 4.2                   | 505    | 55319  | 8.1 | Numb isoform 5                                                                                                                 |
| 4112             | Q9QZS3-4         | 2                    | 2              | 3.5                   | 593    | 64394  | 8.5 | Isoform 4 of Protein numb log                                                                                                  |
| 4112             | Q9QZS3-2         | 2                    | 2              | 3.5                   | 604    | 65766  | 8.7 | Isoform 2 of Protein numb log                                                                                                  |
| 4112             | P49757-4         | 2                    | 2              | 3.5                   | 592    | 64527  | 8.4 | Isoform 4 of Protein numb log                                                                                                  |
| 4112             | P49757-2         | 2                    | 2              | 3.5                   | 603    | 65899  | 8.7 | Isoform 2 of Protein numb log                                                                                                  |
| 4112             | Q9QZS3-3         | 2                    | 2              | 3.3                   | 642    | 69440  | 8.4 | Isoform 3 of Protein numb log                                                                                                  |
| 4112             | P49757-3         | 2                    | 2              | 3.3                   | 640    | 69431  | 8.2 | Isoform 3 of Protein numb log                                                                                                  |
| 4112             | B2RCI6           | 2                    | 2              | 3.3                   | 640    | 69359  | 8.3 | cDNA, FLJ96094, highly similar to sapiens numb log (Drosophila) (NUMB), mRNA                                                   |
| 4112             | Q9QZS3           | 2                    | 2              | 3.2                   | 653    | 70813  | 8.6 | Protein numb log                                                                                                               |
| 4112             | P49757           | 2                    | 2              | 3.2                   | 651    | 70804  | 8.5 | Protein numb log                                                                                                               |
| 4113             | B2RC26           | 2                    | 2              | 4.2                   | 766    | 88170  | 5.5 | cDNA, FLJ95817, highly similar to sapiens ZYG log (ZYG), mRNA                                                                  |
| 4113             | Q80ZJ6-2         | 2                    | 2              | 4.2                   | 766    | 87738  | 5.8 | Isoform 2 of Protein zer-1 log                                                                                                 |
| 4113             | Q7Z7L7           | 2                    | 2              | 4.2                   | 766    | 88170  | 5.6 | Protein zer-1 log                                                                                                              |
| 4113             | Q80ZJ6           | 2                    | 2              | 4.1                   | 779    | 89076  | 5.9 | Protein zer-1 log                                                                                                              |
| 4114             | Q6ZMI0-4         | 2                    | 2              | 9.1                   | 363    | 42133  | 6.9 | Isoform 4 of KLRAQ motif-containing protein 1                                                                                  |
| 4114             | UPI000173A4AB    | 2                    | 2              | 5.9                   | 556    | 63251  | 7.9 | UPI000173A4AB UniRef100 entry                                                                                                  |
| 4114             | Q6ZMI0-3         | 2                    | 2              | 5.7                   | 574    | 65352  | 6.8 | Isoform 3 of KLRAQ motif-containing protein 1                                                                                  |
| 4114             | B7ZKY7           | 2                    | 2              | 4.5                   | 738    | 83700  | 7.2 | KLRAQ1 protein                                                                                                                 |
| 4114             | Q6ZMI0-2         | 2                    | 2              | 4.3                   | 769    | 87153  | 6.9 | Isoform 2 of KLRAQ motif-containing protein 1                                                                                  |
| 4114             | B2RPZ6           | 2                    | 2              | 4.2                   | 780    | 88337  | 6.9 | KLRAQ motif containing 1                                                                                                       |
| 4114             | Q6ZMI0           | 2                    | 2              | 4.2                   | 780    | 88314  | 6.8 | KLRAQ motif-containing protein 1                                                                                               |
| 4114             | Q3TDD9           | 2                    | 2              | 4.2                   | 780    | 88363  | 7   | KLRAQ motif-containing protein 1                                                                                               |
| 4115             | B7ZLV6           | 2                    | 2              | 4.2                   | 853    | 97526  | 6.9 | TAOK1 protein                                                                                                                  |
| 4115             | Q7L7X3           | 2                    | 2              | 3.6                   | 1001   | 116070 | 7.7 | Serine/threonine-protein kinase TAO1                                                                                           |
| 4115             | Q5F2E8           | 2                    | 2              | 3.6                   | 1001   | 116050 | 7.6 | Serine/threonine-protein kinase TAO1                                                                                           |
| 4116             | UPI000024DC9E    | 2                    | 2              | 4.5                   | 556    | 61453  | 6.6 | menin isoform c                                                                                                                |
| 4116             | Q8CI72           | 2                    | 2              | 4.5                   | 556    | 61479  | 6.6 | Men1 protein                                                                                                                   |
| 4116             | E7EN32           | 2                    | 2              | 4.5                   | 555    | 61419  | 6.9 | Uncharacterized protein                                                                                                        |
| 4116             | O00255-3         | 2                    | 2              | 4.3                   | 575    | 63748  | 6.6 | Isoform 3 of Menin                                                                                                             |
| 4116             | D3YZC2           | 2                    | 2              | 4.3                   | 576    | 63752  | 6.4 | Uncharacterized protein                                                                                                        |
| 4116             | A5HBC6           | 2                    | 2              | 4.1                   | 610    | 67384  | 6.6 | Menin W471C variant                                                                                                            |
| 4116             | Q91UZ7           | 2                    | 2              | 4.1                   | 611    | 67501  | 6.4 | MEN1 tumor suppressor                                                                                                          |
| 4116             | O88559           | 2                    | 2              | 4.1                   | 611    | 67473  | 6.5 | Menin                                                                                                                          |
| 4116             | O00255-2         | 2                    | 2              | 4.1                   | 610    | 67497  | 6.6 | Isoform 2 of Menin                                                                                                             |
| 4116             | O00255           | 2                    | 2              | 4.1                   | 615    | 68023  | 6.6 | Menin                                                                                                                          |
| 4116             | E9Q4P8           | 2                    | 2              | 4.1                   | 616    | 68060  | 6.4 | Uncharacterized protein                                                                                                        |
| 4116             | A5HBD1           | 2                    | 2              | 4.1                   | 603    | 66644  | 6.4 | Menin 375del21 variant                                                                                                         |
| 4116             | A5HBD0           | 2                    | 2              | 4.1                   | 610    | 67501  | 6.6 | Menin 1147F variant                                                                                                            |
| 4116             | A5HBC8           | 2                    | 2              | 4.1                   | 610    | 67510  | 6.7 | Menin L413R variant                                                                                                            |
| 4116             | A5HBC7           | 2                    | 2              | 4.1                   | 610    | 67451  | 6.6 | Menin L414P variant                                                                                                            |
| 4117             | B4DNM1           | 2                    | 3              | 4.2                   | 683    | 75982  | 8.6 | YME1-like 1 (S. cerevisiae), isoform CRA_c                                                                                     |
| 4117             | A8K5H7           | 2                    | 3              | 4.1                   | 716    | 79845  | 8.6 | cDNA FLJ77542, highly similar to sapiens YME1-like 1 (S. cerevisiae) (YME1L1), transcript variant 3, mRNA                      |
| 4117             | Q96TA2-2         | 2                    | 3              | 4.1                   | 716    | 79832  | 8.6 | Isoform 2 of ATP-dependent zinc metalloprotease YME1L1                                                                         |
| 4117             | O88967           | 2                    | 3              | 4.1                   | 715    | 80028  | 9   | ATP-dependent zinc metalloprotease YME1L1                                                                                      |
| 4117             | Q96TA2           | 2                    | 3              | 3.8                   | 773    | 86455  | 8.8 | ATP-dependent zinc metalloprotease YME1L1                                                                                      |
| 4118             | Q92783-2         | 2                    | 2              | 5.5                   | 403    | 44972  | 4.9 | Isoform 2 of Signal transducing adapter molecule 1                                                                             |

Table S1. Proteins identified in the OVCAR-3 tumor supernatant by two or more unique peptides.

| Protein or Protein Group | Accession Number | Unique Peptide Count | Spectrum Count | Sequence Coverage (%) | Length | MolWt  | pI  | Descriptive Name                                                                                                                               |
|--------------------------|------------------|----------------------|----------------|-----------------------|--------|--------|-----|------------------------------------------------------------------------------------------------------------------------------------------------|
| 4118                     | Q3UGN9           | 2                    | 2              | 4.8                   | 462    | 51145  | 4.9 | Signal transducing adaptor molecule (SH3 domain and ITAM motif) 1                                                                              |
| 4118                     | B2RAY1           | 2                    | 2              | 4.1                   | 540    | 59150  | 4.8 | cDNA, FLJ95184, highly similar to sapiens signal transducing adaptor molecule (SH3 domain and ITAM motif) 1 (STAM), mRNA                       |
| 4118                     | Q92783           | 2                    | 2              | 4.1                   | 540    | 59180  | 4.8 | Signal transducing adapter molecule 1                                                                                                          |
| 4118                     | Q3UMC8           | 2                    | 2              | 4                     | 553    | 60243  | 4.8 | Putative uncharacterized protein                                                                                                               |
| 4118                     | P70297           | 2                    | 2              | 4                     | 548    | 59771  | 4.8 | Signal transducing adapter molecule 1                                                                                                          |
| 4119                     | Q7Z721           | 2                    | 3              | 4.7                   | 451    | 51016  | 6.5 | RPS6KB1 protein                                                                                                                                |
| 4119                     | B4DDM0           | 2                    | 3              | 4.4                   | 481    | 54122  | 8.4 | cDNA FLJ54786, highly similar to Ribosomal protein S6 kinase beta-1 (EC 2.7.11.1)                                                              |
| 4119                     | Q8BSK8-2         | 2                    | 3              | 4.2                   | 502    | 56229  | 6.3 | Isoform Alpha II of Ribosomal protein S6 kinase beta-1                                                                                         |
| 4119                     | P23443-2         | 2                    | 3              | 4.2                   | 502    | 56189  | 6.4 | Isoform Alpha II of Ribosomal protein S6 kinase beta-1                                                                                         |
| 4119                     | B2R779           | 2                    | 3              | 4                     | 525    | 59106  | 6.7 | cDNA, FLJ93319, highly similar to sapiens ribosomal protein S6 kinase, 70kDa, polypeptide 1(RPS6KB1), mRNA                                     |
| 4119                     | Q8BSK8           | 2                    | 3              | 4                     | 525    | 59218  | 6.7 | Ribosomal protein S6 kinase beta-1                                                                                                             |
| 4119                     | Q5SWG1           | 2                    | 3              | 4                     | 525    | 59146  | 6.8 | Ribosomal protein S6 kinase, polypeptide 1                                                                                                     |
| 4119                     | Q3UXD8           | 2                    | 3              | 4                     | 525    | 59145  | 7.1 | Putative uncharacterized protein                                                                                                               |
| 4119                     | P23443           | 2                    | 3              | 4                     | 525    | 59140  | 6.7 | Ribosomal protein S6 kinase beta-1                                                                                                             |
| 4120                     | B4E0Q1           | 2                    | 2              | 4.1                   | 758    | 86412  | 8.1 | cDNA FLJ50335, highly similar to Trpc4-associated protein                                                                                      |
| 4120                     | B4DQU2           | 2                    | 2              | 4                     | 782    | 89139  | 7.1 | cDNA FLJ51744, highly similar to Trpc4-associated protein                                                                                      |
| 4120                     | A2AQP2           | 2                    | 2              | 3.9                   | 789    | 89914  | 7.6 | Transient receptor potential cation channel subfamily C member 4 associated protein                                                            |
| 4120                     | Q9JLV2           | 2                    | 2              | 3.9                   | 797    | 90727  | 7.6 | Short transient receptor potential channel 4-associated protein                                                                                |
| 4120                     | Q8TEL6           | 2                    | 2              | 3.9                   | 797    | 90852  | 7.6 | Short transient receptor potential channel 4-associated protein                                                                                |
| 4120                     | E1P5Q0           | 2                    | 2              | 3.9                   | 789    | 90043  | 7.6 | Transient receptor potential cation channel, subfamily C, member 4 associated protein, isoform CRA_e                                           |
| 4120                     | B2RDK8           | 2                    | 2              | 3.9                   | 797    | 90765  | 7.7 | cDNA, FLJ96658, highly similar to sapiens transient receptor potential cation channel, subfamilyC, member 4 associated protein (TRPC4AP), mRNA |
| 4121                     | A3KGB4           | 2                    | 2              | 3.9                   | 1114   | 127893 | 5.5 | TBC1 domain family member 8B                                                                                                                   |
| 4121                     | UPI0001D3B452    | 2                    | 2              | 3.9                   | 1114   | 128108 | 6   | TBC1 domain family, member 8B (with GRAM domain) isoform a                                                                                     |
| 4121                     | B9EKQ1           | 2                    | 2              | 3.9                   | 1110   | 127476 | 5.5 | Tbc1d8b protein                                                                                                                                |
| 4121                     | Q0IIM8           | 2                    | 2              | 3.8                   | 1120   | 128709 | 5.9 | TBC1 domain family member 8B                                                                                                                   |
| 4122                     | Q8WUA7-3         | 2                    | 2              | 5.6                   | 324    | 36514  | 6.1 | Isoform 3 of TBC1 domain family member 22A                                                                                                     |
| 4122                     | B4DWA9           | 2                    | 2              | 4.5                   | 403    | 47100  | 6.6 | cDNA FLJ57214, highly similar to TBC1 domain family member 22A                                                                                 |
| 4122                     | Q8WUA7-2         | 2                    | 2              | 4.1                   | 439    | 50931  | 5.9 | Isoform 2 of TBC1 domain family member 22A                                                                                                     |
| 4122                     | E9QMS2           | 2                    | 2              | 4                     | 448    | 51324  | 6.6 | Uncharacterized protein                                                                                                                        |
| 4122                     | B0QY11           | 2                    | 2              | 3.9                   | 458    | 53040  | 6.1 | TBC1 domain family, member 22A                                                                                                                 |
| 4122                     | B0QY13           | 2                    | 2              | 3.8                   | 470    | 53908  | 5.4 | TBC1 domain family, member 22A                                                                                                                 |
| 4122                     | Q8WUA7           | 2                    | 2              | 3.5                   | 517    | 59121  | 6   | TBC1 domain family member 22A                                                                                                                  |
| 4122                     | Q8R5A6-2         | 2                    | 2              | 3.5                   | 521    | 59938  | 6.4 | Isoform 2 of TBC1 domain family member 22A                                                                                                     |
| 4122                     | Q8R5A6           | 2                    | 2              | 3.5                   | 516    | 59362  | 6.5 | TBC1 domain family member 22A                                                                                                                  |
| 4122                     | B3KP29           | 2                    | 2              | 3.5                   | 517    | 59160  | 6.1 | cDNA FLJ31029 fis, clone HSYRA1000119, highly similar to TBC1 domain family member 22A                                                         |
| 4122                     | B2RE30           | 2                    | 2              | 3.5                   | 517    | 59102  | 6.1 | cDNA, FLJ96895, highly similar to sapiens TBC1 domain family, member 22A (TBC1D22A), mRNA                                                      |
| 4123                     | Q6ZMM9           | 2                    | 7              | 6.3                   | 317    | 35359  | 6.7 | cDNA FLJ16815 fis, clone THYMU3044175, highly similar to Adenosylcysteinease (EC 3.3.1.1)                                                      |
| 4123                     | Q80TQ9           | 2                    | 7              | 4.2                   | 478    | 53495  | 6.6 | Adenosylcysteinease (Fragment)                                                                                                                 |
| 4123                     | B4E168           | 2                    | 7              | 4.1                   | 483    | 53754  | 7.5 | Adenosylcysteinease                                                                                                                            |
| 4123                     | Q2NKW8           | 2                    | 7              | 4                     | 505    | 56469  | 7.8 | Adenosylcysteinease (Fragment)                                                                                                                 |
| 4123                     | B4DI25           | 2                    | 7              | 3.9                   | 508    | 56697  | 8.1 | Adenosylcysteinease                                                                                                                            |
| 4123                     | UPI0001B7934E    | 2                    | 7              | 3.9                   | 518    | 58118  | 8   | UPI0001B7934E UniRef100 entry                                                                                                                  |
| 4123                     | Q68FL4-2         | 2                    | 7              | 3.9                   | 508    | 56757  | 8.1 | Isoform 2 of Putative adenosylcysteinease 3                                                                                                    |
| 4123                     | D9N155           | 2                    | 7              | 3.9                   | 508    | 56944  | 7.1 | Adenosylcysteinease Adenosylcysteinease                                                                                                        |
| 4123                     | D7UEQ7           | 2                    | 7              | 3.9                   | 509    | 57072  | 7.1 | Adenosylcysteinease                                                                                                                            |
| 4123                     | Q6ZNS6           | 2                    | 7              | 3.8                   | 530    | 59596  | 8   | Adenosylcysteinease                                                                                                                            |
| 4123                     | Q43865           | 2                    | 7              | 3.8                   | 530    | 58951  | 6.9 | Putative adenosylcysteinease 2 Putative adenosylcysteinease 2                                                                                  |
| 4123                     | Q96HN2-2         | 2                    | 7              | 3.3                   | 610    | 66593  | 7.4 | Isoform 2 of Putative adenosylcysteinease 3                                                                                                    |
| 4123                     | Q96HN2           | 2                    | 7              | 3.3                   | 611    | 66721  | 7.4 | Putative adenosylcysteinease 3                                                                                                                 |
| 4123                     | Q68FL4           | 2                    | 7              | 3.3                   | 613    | 66899  | 7.4 | Putative adenosylcysteinease 3                                                                                                                 |
| 4123                     | E9PZ90           | 2                    | 7              | 3.3                   | 612    | 66771  | 7.4 | Uncharacterized protein                                                                                                                        |
| 4124                     | UPI0000D77ABF    | 2                    | 3              | 4.3                   | 603    | 67324  | 6.7 | UPI0000D77ABF UniRef100 entry                                                                                                                  |
| 4124                     | Q14161-11        | 2                    | 3              | 4.1                   | 631    | 70183  | 6.6 | Isoform 11 of ARF GTPase-activating protein GIT2                                                                                               |
| 4124                     | Q14161-7         | 2                    | 3              | 4                     | 646    | 71967  | 6.7 | Isoform 7 of ARF GTPase-activating protein GIT2                                                                                                |
| 4124                     | Q14161-6         | 2                    | 3              | 3.9                   | 661    | 73403  | 6.7 | Isoform 6 of ARF GTPase-activating protein GIT2                                                                                                |
| 4124                     | C9JXL4           | 2                    | 3              | 3.8                   | 681    | 76046  | 7.5 | Uncharacterized protein                                                                                                                        |
| 4124                     | UPI0000167B56    | 2                    | 3              | 3.8                   | 679    | 75734  | 7.2 | ARF GTPase-activating protein GIT2 isoform 3                                                                                                   |
| 4124                     | Q80XR8           | 2                    | 3              | 3.8                   | 679    | 75632  | 7.5 | G protein-coupled receptor kinase-interactor 2                                                                                                 |
| 4124                     | Q14161-10        | 2                    | 3              | 3.8                   | 681    | 76072  | 7.5 | Isoform 10 of ARF GTPase-activating protein GIT2                                                                                               |
| 4124                     | D3Z1I2           | 2                    | 3              | 3.8                   | 681    | 75971  | 7.7 | Uncharacterized protein                                                                                                                        |
| 4124                     | Q9JLQ2           | 2                    | 3              | 3.7                   | 708    | 78796  | 7.6 | ARF GTPase-activating protein GIT2                                                                                                             |
| 4124                     | Q14161-8         | 2                    | 3              | 3.7                   | 694    | 77518  | 7.3 | Isoform 8 of ARF GTPase-activating protein GIT2                                                                                                |
| 4124                     | Q14161-4         | 2                    | 3              | 3.7                   | 709    | 78954  | 7.5 | Isoform 4 of ARF GTPase-activating protein GIT2                                                                                                |
| 4124                     | E9QPU7           | 2                    | 3              | 3.7                   | 708    | 78766  | 7.7 | Uncharacterized protein                                                                                                                        |
| 4124                     | Q5DU47           | 2                    | 3              | 3.6                   | 722    | 79774  | 8.1 | MKIAA0148 protein (Fragment)                                                                                                                   |
| 4124                     | Q14161-5         | 2                    | 3              | 3.6                   | 729    | 81322  | 7   | Isoform 5 of ARF GTPase-activating protein GIT2                                                                                                |
| 4124                     | Q14161-3         | 2                    | 3              | 3.5                   | 744    | 82759  | 7.1 | Isoform 3 of ARF GTPase-activating protein GIT2                                                                                                |
| 4124                     | Q14161           | 2                    | 3              | 3.4                   | 759    | 84543  | 7.2 | ARF GTPase-activating protein GIT2                                                                                                             |
| 4124                     | E9PVA6           | 2                    | 3              | 3.4                   | 759    | 84457  | 7.6 | Uncharacterized protein                                                                                                                        |
| 4125                     | Q15291-2         | 2                    | 3              | 4.2                   | 500    | 55072  | 5   | Isoform 2 of Retinoblastoma-binding protein 5                                                                                                  |
| 4125                     | Q8BX09           | 2                    | 3              | 3.9                   | 538    | 59098  | 5.1 | Retinoblastoma-binding protein 5                                                                                                               |
| 4125                     | Q15291           | 2                    | 3              | 3.9                   | 538    | 59153  | 5.1 | Retinoblastoma-binding protein 5                                                                                                               |
| 4125                     | B4DMM7           | 2                    | 3              | 3.7                   | 573    | 63304  | 5.2 | cDNA FLJ59722, highly similar to Retinoblastoma-binding protein 5                                                                              |
| 4126                     | B4DSE0           | 2                    | 2              | 3.8                   | 928    | 103510 | 5.6 | Ephrin receptor                                                                                                                                |
| 4126                     | A6NJJM0          | 2                    | 2              | 3.6                   | 981    | 109460 | 5.6 | Ephrin receptor                                                                                                                                |
| 4126                     | A3KG00           | 2                    | 2              | 3.5                   | 987    | 110055 | 5.8 | Ephrin receptor                                                                                                                                |
| 4126                     | Q4LE53           | 2                    | 2              | 3.5                   | 1004   | 111512 | 5.7 | Ephrin receptor (Fragment)                                                                                                                     |
| 4126                     | P54763-2         | 2                    | 2              | 3.5                   | 995    | 110916 | 5.6 | Isoform 2 of Ephrin type-B receptor 2                                                                                                          |
| 4126                     | P54763           | 2                    | 2              | 3.5                   | 994    | 110760 | 5.6 | Ephrin type-B receptor 2                                                                                                                       |
| 4126                     | P29323-3         | 2                    | 2              | 3.5                   | 987    | 110030 | 5.7 | Isoform 3 of Ephrin type-B receptor 2                                                                                                          |
| 4126                     | A3KG02           | 2                    | 2              | 3.5                   | 987    | 110027 | 5.7 | Ephrin receptor                                                                                                                                |
| 4126                     | A3KG01           | 2                    | 2              | 3.5                   | 986    | 109899 | 5.7 | Ephrin receptor                                                                                                                                |
| 4126                     | Q6P5F1           | 2                    | 2              | 3.4                   | 1029   | 114283 | 6.3 | Ephrin receptor (Fragment)                                                                                                                     |
| 4126                     | P29323           | 2                    | 2              | 3.3                   | 1055   | 117493 | 6.5 | Ephrin type-B receptor 2                                                                                                                       |
| 4127                     | Q6PIN6           | 2                    | 2              | 12.1                  | 149    | 16694  | 5.9 | GIT1 protein (Fragment)                                                                                                                        |
| 4127                     | Q3V322           | 2                    | 2              | 7.1                   | 253    | 27752  | 5.7 | Putative uncharacterized protein                                                                                                               |
| 4127                     | B4DS81           | 2                    | 2              | 5.1                   | 351    | 38692  | 6.1 | cDNA FLJ57186, highly similar to ARF GTPase-activating protein GIT1                                                                            |



Table S1. Proteins identified in the OVCAR-3 tumor supernatant by two or more unique peptides.

| Protein or Protein Group | Accession Number | Unique Peptide Count | Spectrum Count | Sequence Coverage (%) | Length | MolWt  | pI   | Descriptive Name                                                                                                                                                   |
|--------------------------|------------------|----------------------|----------------|-----------------------|--------|--------|------|--------------------------------------------------------------------------------------------------------------------------------------------------------------------|
| 4127                     | B4DMF7           | 2                    | 2              | 3.5                   | 520    | 57821  | 6    | cDNA FLJ58515, highly similar to ARF GTPase-activating protein GIT1                                                                                                |
| 4127                     | Q9Y2X7           | 2                    | 2              | 2.4                   | 761    | 84341  | 6.8  | ARF GTPase-activating protein GIT1                                                                                                                                 |
| 4127                     | Q5F258           | 2                    | 2              | 2.4                   | 761    | 84195  | 6.7  | G protein-coupled receptor kinase-interactor 1                                                                                                                     |
| 4127                     | B4DSV3           | 2                    | 2              | 2.4                   | 747    | 83132  | 6.9  | cDNA FLJ60869, highly similar to ARF GTPase-activating protein GIT1                                                                                                |
| 4127                     | Q68FF6           | 2                    | 2              | 2.3                   | 770    | 85300  | 6.9  | ARF GTPase-activating protein GIT1                                                                                                                                 |
| 4127                     | Q59FC3           | 2                    | 2              | 2.3                   | 774    | 85900  | 7.1  | G protein-coupled receptor kinase interactor 1 variant (Fragment)                                                                                                  |
| 4128                     | Q921C5-3         | 2                    | 2              | 6.8                   | 338    | 39315  | 5    | Isoform 3 of Protein bicaudal D log 2                                                                                                                              |
| 4128                     | Q3TBD4           | 2                    | 2              | 3.1                   | 746    | 84716  | 5.7  | Putative uncharacterized protein                                                                                                                                   |
| 4128                     | Q921C5           | 2                    | 2              | 2.8                   | 820    | 93391  | 5.4  | Protein bicaudal D log 2                                                                                                                                           |
| 4128                     | Q8TD16           | 2                    | 2              | 2.8                   | 824    | 93533  | 5.4  | Protein bicaudal D log 2                                                                                                                                           |
| 4128                     | Q921C5-2         | 2                    | 2              | 2.7                   | 851    | 96647  | 5.4  | Isoform 2 of Protein bicaudal D log 2                                                                                                                              |
| 4128                     | Q8TD16-2         | 2                    | 2              | 2.7                   | 855    | 96806  | 5.4  | Isoform 2 of Protein bicaudal D log 2                                                                                                                              |
| 4129                     | Q8N6Z3           | 2                    | 3              | 4.1                   | 463    | 51805  | 7.2  | AVL9 protein                                                                                                                                                       |
| 4129                     | UPI0001AE70A4    | 2                    | 3              | 3.4                   | 559    | 61894  | 5.5  | K0241_HUMAN Isoform 2 of Q8NBF6 - sapiens (Human)                                                                                                                  |
| 4129                     | UPI0000375385    | 2                    | 3              | 3.3                   | 568    | 63293  | 6.2  | UPI0000375385 UniRef100 entry                                                                                                                                      |
| 4129                     | Q8NBF6-2         | 2                    | 3              | 3.2                   | 591    | 65313  | 6    | Isoform 2 of Late secretory pathway protein AVL9 log                                                                                                               |
| 4129                     | B8ZZW5           | 2                    | 3              | 3                     | 630    | 69801  | 6    | Uncharacterized protein                                                                                                                                            |
| 4129                     | Q8NBF6           | 2                    | 3              | 2.9                   | 648    | 71947  | 6.2  | Late secretory pathway protein AVL9 log                                                                                                                            |
| 4129                     | Q8OU56           | 2                    | 3              | 2.9                   | 649    | 72186  | 6.1  | Late secretory pathway protein AVL9 log                                                                                                                            |
| 4130                     | Q8CB12           | 2                    | 6              | 3.7                   | 512    | 56877  | 5    | Putative uncharacterized protein                                                                                                                                   |
| 4130                     | A2AD03           | 2                    | 6              | 2.9                   | 662    | 73664  | 4.7  | Choroideremia                                                                                                                                                      |
| 4130                     | Q9QXG2           | 2                    | 6              | 2.9                   | 665    | 73977  | 4.7  | Rab proteins geranylgeranyltransferase component A 1                                                                                                               |
| 4130                     | P24386           | 2                    | 6              | 2.9                   | 653    | 73476  | 4.7  | Rab proteins geranylgeranyltransferase component A 1 cDNA FLJ78016, highly similar to sapiens choroideremia (Rab escort protein 1) (CHM), transcript variant, mRNA |
| 4131                     | UPI0001889C7E    | 2                    | 6              | 9.7                   | 299    | 32989  | 7.5  | UPI0001889C7E UniRef100 entry                                                                                                                                      |
| 4131                     | B2RNR6           | 2                    | 6              | 2.7                   | 1074   | 117014 | 9    | Zinc finger RNA binding protein                                                                                                                                    |
| 4131                     | Q96KR1           | 2                    | 6              | 2.7                   | 1074   | 117012 | 9    | Zinc finger RNA-binding protein                                                                                                                                    |
| 4131                     | Q88532           | 2                    | 6              | 2.7                   | 1074   | 116859 | 9    | Zinc finger RNA-binding protein                                                                                                                                    |
| 4131                     | B5MEH6           | 2                    | 6              | 2.7                   | 1056   | 115154 | 9.3  | Uncharacterized protein                                                                                                                                            |
| 4132                     | Q8BXH1           | 2                    | 2              | 6                     | 368    | 41932  | 9.4  | Putative uncharacterized protein (Fragment)                                                                                                                        |
| 4132                     | A2AT91           | 2                    | 2              | 2.5                   | 883    | 100651 | 5.4  | Phospholipase C, beta 4 (Fragment)                                                                                                                                 |
| 4132                     | Q5FWA6           | 2                    | 2              | 2.5                   | 892    | 101775 | 5.8  | Plcb4 protein (Fragment)                                                                                                                                           |
| 4132                     | Q15147-2         | 2                    | 2              | 2.2                   | 1022   | 117162 | 7.1  | Isoform 1 of 1-phosphatidylinositol-4,5-bisphosphate phosphodiesterase beta-4                                                                                      |
| 4132                     | E2QRH8           | 2                    | 2              | 2.1                   | 1031   | 118024 | 7.1  | Uncharacterized protein                                                                                                                                            |
| 4132                     | Q91UZ1           | 2                    | 2              | 1.9                   | 1175   | 134527 | 6.9  | Phospholipase C beta 4                                                                                                                                             |
| 4132                     | Q15147           | 2                    | 2              | 1.9                   | 1175   | 134463 | 6.9  | Isoform 3 of 1-phosphatidylinositol-4,5-bisphosphate phosphodiesterase beta-4                                                                                      |
| 4132                     | Q15147-4         | 2                    | 2              | 1.8                   | 1194   | 136106 | 6.8  | phosphodiesterase beta-4                                                                                                                                           |
| 4133                     | Q52K18-2         | 2                    | 17             | 2.5                   | 897    | 101163 | 11.9 | Isoform 2 of Serine/arginine repetitive matrix protein 1                                                                                                           |
| 4133                     | E9QKA4           | 2                    | 17             | 2.5                   | 897    | 101162 | 11.9 | Uncharacterized protein                                                                                                                                            |
| 4133                     | A2A8V8           | 2                    | 17             | 2.4                   | 909    | 102660 | 11.8 | Serine/arginine repetitive matrix 1                                                                                                                                |
| 4133                     | Q81YB3-2         | 2                    | 17             | 2.4                   | 902    | 102126 | 11.8 | Isoform 2 of Serine/arginine repetitive matrix protein 1                                                                                                           |
| 4133                     | Q81YB3           | 2                    | 17             | 2.4                   | 904    | 102335 | 11.8 | Serine/arginine repetitive matrix protein 1                                                                                                                        |
| 4133                     | E9PUK6           | 2                    | 17             | 2.4                   | 923    | 104306 | 11.9 | Uncharacterized protein                                                                                                                                            |
| 4133                     | B7Z7U0           | 2                    | 17             | 2.4                   | 916    | 103797 | 11.8 | cDNA FLJ61739, highly similar to Serine/arginine repetitive matrix protein 1                                                                                       |
| 4133                     | A9Z1X7           | 2                    | 17             | 2.4                   | 913    | 103390 | 11.8 | Serine/arginine repetitive matrix 1                                                                                                                                |
| 4133                     | A2A8V9           | 2                    | 17             | 2.4                   | 918    | 103715 | 11.9 | Serine/arginine repetitive matrix 1                                                                                                                                |
| 4133                     | Q52K18           | 2                    | 17             | 2.3                   | 946    | 106892 | 11.9 | Serine/arginine repetitive matrix protein 1                                                                                                                        |
| 4133                     | E9QNW8           | 2                    | 17             | 2.3                   | 946    | 106862 | 11.9 | Uncharacterized protein                                                                                                                                            |
| 4134                     | Q8BM64           | 2                    | 3              | 4.1                   | 682    | 73972  | 5.3  | Putative uncharacterized protein                                                                                                                                   |
| 4134                     | Q6PIJ6-2         | 2                    | 3              | 2.5                   | 1113   | 125957 | 6.2  | Isoform 2 of F-box only protein 38                                                                                                                                 |
| 4134                     | Q6PIJ6           | 2                    | 3              | 2.4                   | 1188   | 133944 | 6.3  | F-box only protein 38                                                                                                                                              |
| 4134                     | Q8BMI0           | 2                    | 3              | 2.3                   | 1194   | 133928 | 6.1  | F-box only protein 38                                                                                                                                              |
| 4135                     | Q59GY7           | 2                    | 2              | 2.4                   | 765    | 87535  | 6.5  | Signal transducer and activator of transcription 5A variant (Fragment)                                                                                             |
| 4135                     | A8K6I5           | 2                    | 2              | 2.3                   | 794    | 90646  | 6.3  | cDNA FLJ75126, highly similar to sapiens signal transducer and activator of transcription 5A (STAT5A), mRNA                                                        |
| 4135                     | Q8WWS9           | 2                    | 2              | 2.3                   | 791    | 90350  | 6.4  | Signal transducer and activator of transcription 5A                                                                                                                |
| 4135                     | Q59H39           | 2                    | 2              | 2.3                   | 788    | 89966  | 6.2  | Signal transducer and activator of transcription 5B variant (Fragment)                                                                                             |
| 4135                     | P51692           | 2                    | 2              | 2.3                   | 787    | 89866  | 6.1  | Signal transducer and activator of transcription 5B                                                                                                                |
| 4135                     | P42232           | 2                    | 2              | 2.3                   | 786    | 90002  | 6.1  | Signal transducer and activator of transcription 5B                                                                                                                |
| 4135                     | P42230           | 2                    | 2              | 2.3                   | 793    | 90831  | 6.4  | Signal transducer and activator of transcription 5A                                                                                                                |
| 4135                     | P42229           | 2                    | 2              | 2.3                   | 794    | 90647  | 6.4  | Signal transducer and activator of transcription 5A                                                                                                                |
| 4135                     | B2C3G8           | 2                    | 2              | 2.3                   | 797    | 91623  | 7.7  | STAT5a variant delta E18                                                                                                                                           |
| 4136                     | Q59FL3           | 2                    | 3              | 2.1                   | 1289   | 134543 | 5.3  | Notch log 3 variant (Fragment)                                                                                                                                     |
| 4136                     | Q9UM47           | 2                    | 3              | 1.2                   | 2321   | 243629 | 5.4  | Neurogenic locus notch log protein 3                                                                                                                               |
| 4136                     | Q61982           | 2                    | 3              | 1.2                   | 2318   | 244246 | 5.3  | Neurogenic locus notch log protein 3                                                                                                                               |
| 4137                     | B7Z3G4           | 2                    | 5              | 2.7                   | 789    | 90990  | 6.2  | cDNA FLJ60271, highly similar to SLIT-ROBO Rho GTPase-activating protein 2                                                                                         |
| 4137                     | UPI00003E59F4    | 2                    | 5              | 2.5                   | 836    | 95843  | 6    | SLIT-ROBO Rho GTPase-activating protein 2 isoform b                                                                                                                |
| 4137                     | A2RUF3           | 2                    | 5              | 2                     | 1071   | 120870 | 6.7  | SLIT-ROBO Rho GTPase activating protein 2                                                                                                                          |
| 4137                     | Q91Z67           | 2                    | 5              | 2                     | 1071   | 120798 | 6.6  | SLIT-ROBO Rho GTPase-activating protein 2                                                                                                                          |
| 4137                     | O75044           | 2                    | 5              | 2                     | 1071   | 120880 | 6.7  | SLIT-ROBO Rho GTPase-activating protein 2                                                                                                                          |
| 4137                     | B7ZM87           | 2                    | 5              | 2                     | 1070   | 120742 | 6.7  | SRGAP2 protein                                                                                                                                                     |
| 4138                     | C41XU1           | 2                    | 2              | 2                     | 1118   | 126652 | 5.4  | Phosphodiesterase 4D interacting protein (Myomegalin)                                                                                                              |
| 4138                     | Q80YT7-2         | 2                    | 2              | 2                     | 1118   | 126615 | 5.3  | Isoform 2 of Myomegalin                                                                                                                                            |
| 4138                     | E9PL24           | 2                    | 2              | 2                     | 1116   | 126897 | 5.3  | Uncharacterized protein                                                                                                                                            |
| 4138                     | C9JZD2           | 2                    | 2              | 1.9                   | 1131   | 128351 | 5.1  | Uncharacterized protein                                                                                                                                            |
| 4139                     | B2RTQ5           | 2                    | 5              | 1.8                   | 1365   | 150914 | 7.8  | LRRC16A protein                                                                                                                                                    |
| 4139                     | UPI0001CB792A    | 2                    | 5              | 1.8                   | 1365   | 150884 | 7.8  | leucine-rich repeat-containing protein 16A isoform 2                                                                                                               |
| 4139                     | Q5VZK9-2         | 2                    | 5              | 1.8                   | 1326   | 147087 | 7.8  | Isoform 2 of Leucine-rich repeat-containing protein 16A                                                                                                            |
| 4139                     | Q5VZK9           | 2                    | 5              | 1.8                   | 1371   | 151556 | 7.9  | Leucine-rich repeat-containing protein 16A                                                                                                                         |
| 4139                     | E9PU95           | 2                    | 5              | 1.8                   | 1330   | 146814 | 8    | Uncharacterized protein                                                                                                                                            |
| 4139                     | D3Z030           | 2                    | 5              | 1.8                   | 1332   | 147155 | 7.9  | Uncharacterized protein                                                                                                                                            |
| 4139                     | B8X1J0           | 2                    | 5              | 1.8                   | 1371   | 151586 | 7.9  | CARMIL1a                                                                                                                                                           |
| 4139                     | Q6EDY6           | 2                    | 5              | 1.7                   | 1374   | 151860 | 7.8  | Leucine-rich repeat-containing protein 16A                                                                                                                         |
| 4139                     | D3Z024           | 2                    | 5              | 1.7                   | 1374   | 151916 | 7.8  | Uncharacterized protein                                                                                                                                            |
| 4140                     | E7EMW7           | 2                    | 6              | 1.8                   | 2792   | 308574 | 5.8  | Uncharacterized protein                                                                                                                                            |
| 4140                     | UPI0001E6FA93    | 2                    | 6              | 1.8                   | 2806   | 310363 | 6    | PREDICTED: e3 ubiquitin-protein ligase UBR5-like isoform 1, partial                                                                                                |
| 4140                     | UPI000153C072    | 2                    | 6              | 1.8                   | 2798   | 309223 | 5.8  | E3 ubiquitin-protein ligase EDD1 (EC 6.3.2.-) (Hyperplastic discs protein log) (hHYD) (Progesterin-induced protein).                                               |
| 4140                     | UPI0000607490    | 2                    | 6              | 1.8                   | 2792   | 308318 | 5.8  | E3 ubiquitin-protein ligase UBR5 isoform 2                                                                                                                         |
| 4140                     | Q80TP3           | 2                    | 6              | 1.8                   | 2792   | 308351 | 5.9  | E3 ubiquitin-protein ligase UBR5                                                                                                                                   |
| 4140                     | Q95071           | 2                    | 6              | 1.8                   | 2799   | 309352 | 5.8  | E3 ubiquitin-protein ligase UBR5                                                                                                                                   |

Table S1. Proteins identified in the OVCAR-3 tumor supernatant by two or more unique peptides.

| Protein or Protein Group | Accession Number | Unique Peptide Count | Spectrum Count | Sequence Coverage (%) | Length | MolWt  | pI  | Descriptive Name                                                                                                                                                                            |
|--------------------------|------------------|----------------------|----------------|-----------------------|--------|--------|-----|---------------------------------------------------------------------------------------------------------------------------------------------------------------------------------------------|
| 4140                     | E9Q2H1           | 2                    | 6              | 1.8                   | 2798   | 308967 | 5.8 | Uncharacterized protein                                                                                                                                                                     |
| 4141                     | P12036-2         | 2                    | 15             | 1.9                   | 963    | 105639 | 5.9 | Isoform 2 of Neurofilament heavy polypeptide                                                                                                                                                |
| 4141                     | P12036           | 2                    | 15             | 1.8                   | 1026   | 112479 | 6.2 | Neurofilament heavy polypeptide                                                                                                                                                             |
| 4141                     | UPI00001AEF71    | 2                    | 15             | 1.8                   | 1020   | 111838 | 6.1 | neurofilament heavy polypeptide                                                                                                                                                             |
| 4141                     | UPI000024DAAE    | 2                    | 15             | 1.7                   | 1046   | 112570 | 5.7 | neurofilament, heavy polypeptide                                                                                                                                                            |
| 4141                     | Q80TQ3           | 2                    | 15             | 1.7                   | 1046   | 112544 | 5.7 | MKIAA0845 protein (Fragment)                                                                                                                                                                |
| 4141                     | P19246           | 2                    | 15             | 1.7                   | 1090   | 116994 | 5.8 | Neurofilament heavy polypeptide                                                                                                                                                             |
| 4142                     | Q53QS8           | 2                    | 4              | 4                     | 552    | 61036  | 6.9 | Putative uncharacterized protein ERBB4 (Fragment)                                                                                                                                           |
| 4142                     | UPI000198C696    | 2                    | 4              | 3                     | 731    | 81013  | 6.9 | Receptor tyrosine-protein kinase erbB-4 precursor (EC 2.7.10.1) (p180erbB4) (Tyrosine kinase-type cell surface receptor HER4). V-erb-a erythroblastic leukemia viral oncogene log 4 (Avian) |
| 4142                     | B2KGF7           | 2                    | 4              | 3                     | 732    | 81204  | 6.9 | (Fragment)                                                                                                                                                                                  |
| 4142                     | B2KGF5           | 2                    | 4              | 1.7                   | 1292   | 145245 | 6.4 | V-erb-a erythroblastic leukemia viral oncogene log 4 (Avian)                                                                                                                                |
| 4142                     | Q61527-3         | 2                    | 4              | 1.7                   | 1308   | 146922 | 6.4 | Isoform JM-A CYT-1 of Receptor tyrosine-protein kinase erbB-4                                                                                                                               |
| 4142                     | Q61527-2         | 2                    | 4              | 1.7                   | 1282   | 143953 | 6.2 | Isoform JM-B CYT-2 of Receptor tyrosine-protein kinase erbB-4                                                                                                                               |
| 4142                     | Q61527           | 2                    | 4              | 1.7                   | 1292   | 145213 | 6.4 | Receptor tyrosine-protein kinase erbB-4                                                                                                                                                     |
| 4142                     | Q15303-4         | 2                    | 4              | 1.7                   | 1282   | 143968 | 6.2 | Isoform JM-B CYT-2 of Receptor tyrosine-protein kinase erbB-4                                                                                                                               |
| 4142                     | Q15303-3         | 2                    | 4              | 1.7                   | 1292   | 145198 | 6.4 | Isoform JM-A CYT-2 of Receptor tyrosine-protein kinase erbB-4                                                                                                                               |
| 4142                     | Q15303-2         | 2                    | 4              | 1.7                   | 1298   | 145578 | 6.2 | Isoform JM-B CYT-1 of Receptor tyrosine-protein kinase erbB-4                                                                                                                               |
| 4142                     | Q15303           | 2                    | 4              | 1.7                   | 1308   | 146808 | 6.4 | Receptor tyrosine-protein kinase erbB-4                                                                                                                                                     |
| 4142                     | E9QL41           | 2                    | 4              | 1.7                   | 1282   | 143985 | 6.2 | Uncharacterized protein                                                                                                                                                                     |
| 4142                     | B2KGF6           | 2                    | 4              | 1.7                   | 1308   | 146855 | 6.4 | V-erb-a erythroblastic leukemia viral oncogene log 4 (Avian)                                                                                                                                |
| 4143                     | B2RX07           | 2                    | 2              | 1.6                   | 1553   | 172760 | 8.4 | Cleavage and polyadenylation factor subunit log (S. cerevisiae)                                                                                                                             |
| 4143                     | O94913           | 2                    | 2              | 1.6                   | 1555   | 173050 | 8.5 | Pre-mRNA cleavage complex 2 protein Pcf11                                                                                                                                                   |
| 4143                     | Q69ZY3           | 2                    | 2              | 1.5                   | 1641   | 182204 | 8.8 | MKIAA0824 protein (Fragment)                                                                                                                                                                |
| 4144                     | B4E0T8           | 2                    | 3              | 2.5                   | 1181   | 133547 | 7.1 | cDNA FLJ59649, highly similar to Myosin-18A                                                                                                                                                 |
| 4144                     | Q5QD01           | 2                    | 3              | 1.8                   | 1581   | 180550 | 5.9 | SP-A receptor subunit SP-R210 alphaS                                                                                                                                                        |
| 4144                     | E9QA74           | 2                    | 3              | 1.8                   | 1642   | 186535 | 5.9 | Uncharacterized protein                                                                                                                                                                     |
| 4144                     | B4DYM1           | 2                    | 3              | 1.8                   | 1642   | 186534 | 5.9 | cDNA FLJ60372, highly similar to Myosin-18A                                                                                                                                                 |
| 4144                     | Q9JMH9-7         | 2                    | 3              | 1.7                   | 1716   | 195276 | 5.7 | Isoform 7 of Myosin-XVIIIa                                                                                                                                                                  |
| 4144                     | Q9JMH9-5         | 2                    | 3              | 1.7                   | 1704   | 194046 | 5.7 | Isoform 5 of Myosin-XVIIIa                                                                                                                                                                  |
| 4144                     | Q9JMH9-2         | 2                    | 3              | 1.7                   | 1719   | 195893 | 5.8 | Isoform 2 of Myosin-XVIIIa                                                                                                                                                                  |
| 4144                     | Q92614-2         | 2                    | 3              | 1.7                   | 1723   | 196436 | 5.9 | Isoform 2 of Myosin-XVIIIa                                                                                                                                                                  |
| 4144                     | E9Q405           | 2                    | 3              | 1.7                   | 1700   | 193645 | 5.8 | Uncharacterized protein                                                                                                                                                                     |
| 4144                     | E9Q0J6           | 2                    | 3              | 1.7                   | 1722   | 195988 | 5.6 | Uncharacterized protein                                                                                                                                                                     |
| 4144                     | Q9JMH9-4         | 2                    | 3              | 1.5                   | 1998   | 226356 | 6.2 | Isoform 4 of Myosin-XVIIIa                                                                                                                                                                  |
| 4144                     | B2RRRE2          | 2                    | 3              | 1.4                   | 2047   | 232136 | 6.1 | Myo18a protein                                                                                                                                                                              |
| 4144                     | Q9JMH9-6         | 2                    | 3              | 1.4                   | 2062   | 233983 | 6.2 | Isoform 6 of Myosin-XVIIIa                                                                                                                                                                  |
| 4144                     | Q9JMH9-1         | 2                    | 3              | 1.4                   | 2035   | 230906 | 6.2 | Isoform 1 of Myosin-XVIIIa                                                                                                                                                                  |
| 4144                     | Q9JMH9           | 2                    | 3              | 1.4                   | 2050   | 232753 | 6.3 | Myosin-XVIIIa                                                                                                                                                                               |
| 4144                     | Q92614-4         | 2                    | 3              | 1.4                   | 2039   | 231238 | 6.2 | Isoform 4 of Myosin-XVIIIa                                                                                                                                                                  |
| 4144                     | Q92614-3         | 2                    | 3              | 1.4                   | 2002   | 226688 | 6.2 | Isoform 3 of Myosin-XVIIIa                                                                                                                                                                  |
| 4144                     | Q92614           | 2                    | 3              | 1.4                   | 2054   | 233113 | 6.3 | Myosin-XVIIIa                                                                                                                                                                               |
| 4144                     | E9QAX2           | 2                    | 3              | 1.4                   | 2083   | 235815 | 6.1 | Uncharacterized protein                                                                                                                                                                     |
| 4145                     | Q3UG84           | 2                    | 2              | 1.6                   | 1359   | 150848 | 6.6 | Putative uncharacterized protein (Fragment)                                                                                                                                                 |
| 4145                     | Q3TBX9           | 2                    | 2              | 1.6                   | 1416   | 157258 | 6.7 | Putative uncharacterized protein (Fragment)                                                                                                                                                 |
| 4145                     | E9PGN1           | 2                    | 2              | 1.3                   | 1741   | 193334 | 7.1 | Uncharacterized protein                                                                                                                                                                     |
| 4145                     | Q7TT21           | 2                    | 2              | 1.3                   | 1742   | 194097 | 6.9 | Tuberous sclerosis 2                                                                                                                                                                        |
| 4145                     | Q61037-7         | 2                    | 2              | 1.3                   | 1704   | 189854 | 6.9 | Isoform F of Tuberin                                                                                                                                                                        |
| 4145                     | Q3UGI8           | 2                    | 2              | 1.3                   | 1678   | 186575 | 6.8 | Putative uncharacterized protein (Fragment)                                                                                                                                                 |
| 4145                     | Q3TCQ7           | 2                    | 2              | 1.3                   | 1742   | 194047 | 7   | Putative uncharacterized protein                                                                                                                                                            |
| 4145                     | P49815-6         | 2                    | 2              | 1.3                   | 1704   | 189297 | 7   | Isoform 6 of Tuberin                                                                                                                                                                        |
| 4145                     | P49815-5         | 2                    | 2              | 1.3                   | 1740   | 193247 | 7.1 | Isoform 5 of Tuberin                                                                                                                                                                        |
| 4145                     | UPI0000434D93    | 2                    | 2              | 1.2                   | 1785   | 198849 | 7   | tuberin isoform 1                                                                                                                                                                           |
| 4145                     | Q61037-6         | 2                    | 2              | 1.2                   | 1786   | 198913 | 7   | Isoform E of Tuberin                                                                                                                                                                        |
| 4145                     | Q61037-5         | 2                    | 2              | 1.2                   | 1791   | 199549 | 6.9 | Isoform D of Tuberin                                                                                                                                                                        |
| 4145                     | Q61037-4         | 2                    | 2              | 1.2                   | 1770   | 197162 | 6.8 | Isoform C of Tuberin                                                                                                                                                                        |
| 4145                     | Q61037-3         | 2                    | 2              | 1.2                   | 1775   | 197890 | 7.1 | Isoform B of Tuberin                                                                                                                                                                        |
| 4145                     | Q61037-2         | 2                    | 2              | 1.2                   | 1777   | 197981 | 7   | Isoform A of Tuberin                                                                                                                                                                        |
| 4145                     | Q61037           | 2                    | 2              | 1.2                   | 1814   | 202070 | 7   | Tuberin                                                                                                                                                                                     |
| 4145                     | Q3UHB2           | 2                    | 2              | 1.2                   | 1808   | 201369 | 7.1 | Putative uncharacterized protein                                                                                                                                                            |
| 4145                     | P49815-4         | 2                    | 2              | 1.2                   | 1784   | 198096 | 7.3 | Isoform 4 of Tuberin                                                                                                                                                                        |
| 4145                     | P49815-3         | 2                    | 2              | 1.2                   | 1763   | 195758 | 7.1 | Isoform 3 of Tuberin                                                                                                                                                                        |
| 4145                     | P49815-2         | 2                    | 2              | 1.2                   | 1764   | 195845 | 7.1 | Isoform 2 of Tuberin                                                                                                                                                                        |
| 4145                     | P49815           | 2                    | 2              | 1.2                   | 1807   | 200607 | 7.3 | Tuberin                                                                                                                                                                                     |
| 4145                     | E9QN11           | 2                    | 2              | 1.2                   | 1768   | 197107 | 6.9 | Uncharacterized protein                                                                                                                                                                     |
| 4145                     | E9QN07           | 2                    | 2              | 1.2                   | 1773   | 197733 | 7.1 | Uncharacterized protein                                                                                                                                                                     |
| 4145                     | E9QMZ9           | 2                    | 2              | 1.2                   | 1775   | 197878 | 7   | Uncharacterized protein                                                                                                                                                                     |
| 4145                     | E9QMZ6           | 2                    | 2              | 1.2                   | 1789   | 199425 | 7   | Uncharacterized protein                                                                                                                                                                     |
| 4145                     | E9QMW6           | 2                    | 2              | 1.2                   | 1812   | 201945 | 7   | Uncharacterized protein                                                                                                                                                                     |
| 4145                     | E9QLU3           | 2                    | 2              | 1.2                   | 1786   | 198977 | 7   | Uncharacterized protein                                                                                                                                                                     |
| 4146                     | Q9UKE5-8         | 2                    | 2              | 1.3                   | 1268   | 144251 | 7.1 | Isoform 8 of TRAF2 and NCK-interacting protein kinase                                                                                                                                       |
| 4146                     | Q9UKE5-7         | 2                    | 2              | 1.3                   | 1297   | 147894 | 7   | Isoform 7 of TRAF2 and NCK-interacting protein kinase                                                                                                                                       |
| 4146                     | Q9UKE5-6         | 2                    | 2              | 1.3                   | 1323   | 150365 | 7.4 | Isoform 6 of TRAF2 and NCK-interacting protein kinase                                                                                                                                       |
| 4146                     | Q9UKE5-5         | 2                    | 2              | 1.3                   | 1276   | 145186 | 7.1 | Isoform 5 of TRAF2 and NCK-interacting protein kinase                                                                                                                                       |
| 4146                     | Q9UKE5-4         | 2                    | 2              | 1.3                   | 1352   | 154008 | 7.2 | Isoform 4 of TRAF2 and NCK-interacting protein kinase                                                                                                                                       |
| 4146                     | Q9UKE5-3         | 2                    | 2              | 1.3                   | 1305   | 148829 | 7   | Isoform 3 of TRAF2 and NCK-interacting protein kinase                                                                                                                                       |
| 4146                     | Q9UKE5-2         | 2                    | 2              | 1.3                   | 1331   | 151300 | 7.4 | Isoform 2 of TRAF2 and NCK-interacting protein kinase                                                                                                                                       |
| 4146                     | P83510-2         | 2                    | 2              | 1.3                   | 1289   | 146713 | 8   | Isoform 2 of Traf2 and NCK-interacting protein kinase                                                                                                                                       |
| 4146                     | P83510           | 2                    | 2              | 1.3                   | 1323   | 150366 | 7.3 | Traf2 and NCK-interacting protein kinase                                                                                                                                                    |
| 4146                     | E9Q617           | 2                    | 2              | 1.3                   | 1289   | 146759 | 7.9 | Uncharacterized protein                                                                                                                                                                     |
| 4146                     | E9PUL9           | 2                    | 2              | 1.3                   | 1331   | 151301 | 7.3 | Uncharacterized protein                                                                                                                                                                     |
| 4146                     | E0CZF8           | 2                    | 2              | 1.3                   | 1268   | 144253 | 7.1 | Uncharacterized protein                                                                                                                                                                     |
| 4146                     | E0CZD7           | 2                    | 2              | 1.3                   | 1276   | 145188 | 7.1 | Uncharacterized protein                                                                                                                                                                     |
| 4146                     | E0CY98           | 2                    | 2              | 1.3                   | 1305   | 148831 | 6.9 | Uncharacterized protein                                                                                                                                                                     |
| 4146                     | E0CXD6           | 2                    | 2              | 1.3                   | 1297   | 147896 | 6.9 | Uncharacterized protein                                                                                                                                                                     |
| 4146                     | B9EKN8           | 2                    | 2              | 1.3                   | 1352   | 154010 | 7.1 | TRAF2 and NCK interacting kinase                                                                                                                                                            |
| 4146                     | B2RXX2           | 2                    | 2              | 1.3                   | 1323   | 150427 | 7.3 | Tnik protein                                                                                                                                                                                |
| 4146                     | B2RQ80           | 2                    | 2              | 1.2                   | 1360   | 154945 | 7.1 | Tnik protein                                                                                                                                                                                |
| 4146                     | UPI0001AADE61    | 2                    | 2              | 1.2                   | 1363   | 155263 | 7   | traf2 and NCK-interacting protein kinase isoform 4                                                                                                                                          |
| 4146                     | Q9UKE5           | 2                    | 2              | 1.2                   | 1360   | 154943 | 7.2 | TRAF2 and NCK-interacting protein kinase                                                                                                                                                    |
| 4146                     | B2RY17           | 2                    | 2              | 1.2                   | 1363   | 155297 | 7   | Tnik protein                                                                                                                                                                                |
| 4147                     | Q6GYPT-4         | 2                    | 3              | 2.2                   | 1037   | 117170 | 5.9 | Isoform 5 of Ral GTPase-activating protein subunit alpha-1                                                                                                                                  |
| 4147                     | Q6GYQ0-3         | 2                    | 3              | 2.1                   | 1104   | 124733 | 6.2 | Isoform 3 of Ral GTPase-activating protein subunit alpha-1                                                                                                                                  |
| 4147                     | Q6GYQ0-4         | 2                    | 3              | 1.2                   | 1961   | 221097 | 6.1 | Isoform 4 of Ral GTPase-activating protein subunit alpha-1                                                                                                                                  |
| 4147                     | B7ZNA3           | 2                    | 3              | 1.1                   | 2082   | 234379 | 6.1 | Garnl1 protein                                                                                                                                                                              |
| 4147                     | Q6GYQ0-6         | 2                    | 3              | 1.1                   | 2083   | 234851 | 6.2 | Isoform 6 of Ral GTPase-activating protein subunit alpha-1                                                                                                                                  |
| 4147                     | Q6GYQ0-5         | 2                    | 3              | 1.1                   | 2073   | 234124 | 6.3 | Isoform 5 of Ral GTPase-activating protein subunit alpha-1                                                                                                                                  |
| 4147                     | Q6GYQ0-2         | 2                    | 3              | 1.1                   | 2083   | 234729 | 6.3 | Isoform 2 of Ral GTPase-activating protein subunit alpha-1                                                                                                                                  |
| 4147                     | Q6GYQ0           | 2                    | 3              | 1.1                   | 2036   | 229830 | 6.2 | Ral GTPase-activating protein subunit alpha-1                                                                                                                                               |
| 4147                     | Q6GYPT-2         | 2                    | 3              | 1.1                   | 2068   | 232644 | 6.1 | Isoform 2 of Ral GTPase-activating protein subunit alpha-1                                                                                                                                  |
| 4147                     | Q6GYPT           | 2                    | 3              | 1.1                   | 2035   | 229387 | 6.1 | Ral GTPase-activating protein subunit alpha-1                                                                                                                                               |
| 4147                     | E9QMM1           | 2                    | 3              | 1.1                   | 2083   | 234238 | 6.2 | Uncharacterized protein                                                                                                                                                                     |
| 4147                     | E9Q680           | 2                    | 3              | 1.1                   | 2082   | 234409 | 6.1 | Uncharacterized protein                                                                                                                                                                     |

Table S1. Proteins identified in the OVCAR-3 tumor supernatant by two or more unique peptides.

| Protein or Group | Accession Number | Unique Peptide Count | Spectrum Count | Sequence Coverage (%) | Length | MolWt  | pI   | Descriptive Name                                                                                        |
|------------------|------------------|----------------------|----------------|-----------------------|--------|--------|------|---------------------------------------------------------------------------------------------------------|
| 4147             | E7EQJ8           | 2                    | 3              | 1.1                   | 2073   | 234154 | 6.3  | Uncharacterized protein                                                                                 |
| 4147             | B9EK38           | 2                    | 3              | 1.1                   | 2049   | 231136 | 6.1  | GARNL1 protein                                                                                          |
| 4148             | A2AQP0           | 2                    | 4              | 1                     | 1941   | 221495 | 5.9  | Myosin-7B                                                                                               |
| 4148             | A7E2Y1           | 2                    | 4              | 1                     | 1941   | 221386 | 6    | Myosin-7B                                                                                               |
| 4149             | E9PX61           | 2                    | 4              | 0.7                   | 4126   | 452569 | 6.2  | Uncharacterized protein                                                                                 |
| 4149             | Q9Y4D8-4         | 2                    | 4              | 0.7                   | 3984   | 438033 | 6.2  | Isoform 4 of Probable E3 ubiquitin-protein ligase C12orf51                                              |
| 4149             | Q9Y4D8           | 2                    | 4              | 0.7                   | 3996   | 439348 | 6.2  | Probable E3 ubiquitin-protein ligase C12orf51<br>PREDICTED: LOW QUALITY PROTEIN: probable E3 ubiquitin- |
| 4149             | UPI0001E6B9D9    | 2                    | 4              | 0.6                   | 4392   | 481720 | 6.1  | protein ligase KIAA0614                                                                                 |
| 4150             | Q5VST9-5         | 2                    | 3              | 0.5                   | 3911   | 427048 | 6.6  | Isoform 4 of Obscurin                                                                                   |
| 4150             | UPI00004578F0    | 2                    | 3              | 0.3                   | 6620   | 721580 | 5.8  | obscurin isoform a                                                                                      |
| 4150             | Q5VST9-3         | 2                    | 3              | 0.3                   | 6620   | 721557 | 5.7  | Isoform 3 of Obscurin                                                                                   |
| 4150             | A2AAJ9-2         | 2                    | 3              | 0.3                   | 7167   | 779871 | 5.9  | Isoform 2 of Obscurin                                                                                   |
| 4150             | A2AAJ9           | 2                    | 3              | 0.2                   | 8891   | 966386 | 5.9  | Obscurin                                                                                                |
| 4150             | UPI0001C2BFA8    | 2                    | 3              | 0.2                   | 8025   | 873829 | 5.9  | obscurin isoform 1                                                                                      |
| 4150             | UPI0001C2BFA7    | 2                    | 3              | 0.2                   | 7489   | 814925 | 5.8  | obscurin isoform 2                                                                                      |
| 4150             | UPI0001545E46    | 2                    | 3              | 0.2                   | 7968   | 868519 | 6    | obscurin isoform b                                                                                      |
| 4150             | Q5VST9           | 2                    | 3              | 0.2                   | 7968   | 868496 | 6    | Obscurin                                                                                                |
| 4150             | E9QQ96           | 2                    | 3              | 0.2                   | 7490   | 815053 | 5.8  | Uncharacterized protein                                                                                 |
| 4150             | E9QNK1           | 2                    | 3              | 0.2                   | 8026   | 873957 | 5.9  | Uncharacterized protein                                                                                 |
| 4151             | Q7TPR4           | 2                    | 20             | 78.7                  | 892    | 103068 | 5.4  | Alpha-actinin-1                                                                                         |
| 4152             | B0LAA9           | 2                    | 12             | 71.1                  | 76     | 8484   | 10   | Phosphoglycerate kinase (Fragment)                                                                      |
| 4153             | P62983           | 2                    | 11             | 68.6                  | 156    | 17951  | 9.6  | Ubiquitin-40S ribosomal protein S27a                                                                    |
| 4154             | P47955           | 2                    | 7              | 51.8                  | 114    | 11475  | 4.3  | 60S acidic ribosomal protein P1                                                                         |
| 4155             | P57776           | 2                    | 5              | 49.5                  | 281    | 31293  | 5    | Elongation factor 1-delta                                                                               |
| 4155             | P57776-3         | 2                    | 5              | 21.1                  | 660    | 72931  | 6.4  | Isoform 3 of Elongation factor 1-delta                                                                  |
| 4156             | E9QAV5           | 2                    | 2              | 46.9                  | 326    | 37413  | 4.7  | Uncharacterized protein                                                                                 |
| 4157             | D4A9P7           | 2                    | 5              | 41.9                  | 86     | 10187  | 5.8  | RCG40058                                                                                                |
| 4157             | Q8BGS2           | 2                    | 5              | 41.9                  | 86     | 10215  | 6.2  | BolA-like protein 2                                                                                     |
| 4158             | P99025           | 2                    | 3              | 40.5                  | 84     | 9584   | 6.3  | GTP cyclohydrolase 1 feedback regulatory protein                                                        |
| 4159             | E9Q456           | 2                    | 4              | 39.9                  | 248    | 28668  | 4.8  | Uncharacterized protein                                                                                 |
| 4160             | P08009           | 2                    | 6              | 38.5                  | 218    | 25681  | 7.3  | Glutathione S-transferase Yb-3                                                                          |
| 4161             | UPI0000512260    | 2                    | 10             | 37.1                  | 89     | 10273  | 7.9  | hypothetical protein LOC627788                                                                          |
| 4162             | Q62426           | 2                    | 12             | 32.7                  | 98     | 11046  | 7.4  | Cystatin-B                                                                                              |
| 4163             | Q61820           | 2                    | 3              | 31.9                  | 216    | 24452  | 6.5  | GTP-binding nuclear protein Ran, testis-specific isoform                                                |
| 4164             | Q8K5B2           | 2                    | 3              | 28.3                  | 145    | 16168  | 4.7  | Multiple coagulation factor deficiency protein 2 homolog                                                |
| 4165             | P33622           | 2                    | 22             | 38.4                  | 99     | 10982  | 4.7  | Apolipoprotein C-III                                                                                    |
| 4165             | E9QP56           | 2                    | 22             | 27.7                  | 137    | 15163  | 5.6  | Uncharacterized protein                                                                                 |
| 4166             | Q6P777           | 2                    | 14             | 27.6                  | 76     | 8801   | 6.5  | Rab2b protein                                                                                           |
| 4167             | UPI00006037ED    | 2                    | 4              | 27.7                  | 119    | 13294  | 6.5  | PREDICTED: replication protein A 14 kDa subunit-like                                                    |
| 4167             | UPI000002273D    | 2                    | 4              | 27.7                  | 119    | 13256  | 5.5  | PREDICTED: replication protein A 14 kDa subunit-like                                                    |
| 4167             | Q9CQ71           | 2                    | 4              | 27.3                  | 121    | 13584  | 4.8  | Replication protein A 14 kDa subunit                                                                    |
| 4168             | E9QMV2           | 2                    | 8              | 27.2                  | 81     | 9058   | 5.8  | Uncharacterized protein                                                                                 |
| 4168             | Q4KML4           | 2                    | 8              | 27.2                  | 81     | 9030   | 5.8  | Costars family protein C6orf115 homolog                                                                 |
| 4169             | B2CSK2           | 2                    | 15             | 24.2                  | 641    | 70607  | 6.2  | Heat shock protein 1-like protein                                                                       |
| 4169             | P16627           | 2                    | 15             | 24.2                  | 641    | 70637  | 6.2  | Heat shock 70 kDa protein 1-like                                                                        |
| 4170             | P34928           | 2                    | 2              | 22.7                  | 88     | 9696   | 9.1  | Apolipoprotein C-I                                                                                      |
| 4171             | Q5M8N0           | 2                    | 3              | 23.8                  | 164    | 18612  | 8    | CB1 cannabinoid receptor-interacting protein 1                                                          |
| 4171             | Q5F272           | 2                    | 3              | 21.2                  | 184    | 20726  | 9.4  | Cannabinoid receptor interacting protein 1 (Fragment)                                                   |
| 4172             | Q9D8S9           | 2                    | 2              | 21.2                  | 137    | 14379  | 8.8  | BolA-like protein 1                                                                                     |
| 4173             | E9Q138           | 2                    | 6              | 20.4                  | 137    | 15197  | 9.4  | Uncharacterized protein                                                                                 |
| 4173             | E9PU89           | 2                    | 6              | 19.6                  | 143    | 15992  | 9.7  | Uncharacterized protein                                                                                 |
| 4173             | P05017           | 2                    | 6              | 18.3                  | 153    | 17093  | 9.4  | Insulin-like growth factor I                                                                            |
| 4173             | Q4VJB9           | 2                    | 6              | 17.6                  | 159    | 17888  | 9.6  | Insulin-like growth factor 1 isoform Eb                                                                 |
| 4173             | Q8CAR0           | 2                    | 6              | 17                    | 165    | 18473  | 9.8  | Putative uncharacterized protein                                                                        |
| 4174             | Q3TVE3           | 2                    | 7              | 19.4                  | 124    | 14296  | 5.5  | Putative uncharacterized protein                                                                        |
| 4174             | Q9D708           | 2                    | 7              | 19.4                  | 124    | 14324  | 5.9  | S100 calcium binding protein A16                                                                        |
| 4175             | P21460           | 2                    | 11             | 19.3                  | 140    | 15531  | 9    | Cystatin-C                                                                                              |
| 4175             | Q9EPX9           | 2                    | 11             | 19.3                  | 140    | 15517  | 8.8  | Cystatin C                                                                                              |
| 4176             | Q4FJY2           | 2                    | 4              | 19.1                  | 152    | 17676  | 8.1  | Ubiquitin carrier protein                                                                               |
| 4176             | Q9QZU9           | 2                    | 4              | 19                    | 153    | 17841  | 8.1  | Ubiquitin/SG15-conjugating enzyme E2 L6                                                                 |
| 4177             | Q8BH80           | 2                    | 11             | 18.9                  | 243    | 26918  | 7.8  | Vesicle-associated membrane protein, associated protein B and C                                         |
| 4177             | Q9QY76           | 2                    | 11             | 18.9                  | 243    | 26946  | 7.8  | Vesicle-associated membrane protein-associated protein B                                                |
| 4178             | Q920X5           | 2                    | 3              | 32.4                  | 105    | 11923  | 5    | Cathelicidin (Fragment)                                                                                 |
| 4178             | P51437           | 2                    | 3              | 19.7                  | 173    | 19582  | 8.7  | Cathelin-related antimicrobial peptide                                                                  |
| 4178             | E9Q9D3           | 2                    | 3              | 18.5                  | 184    | 20663  | 8.8  | Uncharacterized protein                                                                                 |
| 4178             | Q3TZ97           | 2                    | 3              | 18.4                  | 185    | 20750  | 8.8  | Putative uncharacterized protein                                                                        |
| 4179             | Q9CQ86           | 2                    | 3              | 18.3                  | 115    | 12295  | 4.5  | Protein C17orf37 homolog                                                                                |
| 4180             | Q9D937           | 2                    | 2              | 17.9                  | 123    | 14099  | 11.5 | MCG127334                                                                                               |
| 4181             | Q60648           | 2                    | 2              | 16.6                  | 193    | 20824  | 5.9  | Ganglioside GM2 activator                                                                               |
| 4182             | Q9WV35           | 2                    | 2              | 16.5                  | 224    | 25660  | 4.8  | Probable C- U-editing enzyme APOBEC-2                                                                   |
| 4183             | P24472           | 2                    | 2              | 16.2                  | 222    | 25564  | 7.4  | Glutathione S-transferase A4<br>STAR-related lipid transfer (START) domain containing 5, isoform        |
| 4184             | D3YU00           | 2                    | 2              | 16                    | 206    | 23166  | 5.5  | CRA_a                                                                                                   |
| 4184             | Q9EPQ7           | 2                    | 2              | 15.5                  | 213    | 23922  | 6.4  | STAR-related lipid transfer protein 5                                                                   |
| 4185             | Q8R5J9           | 2                    | 4              | 16                    | 188    | 21558  | 9.6  | PRA1 family protein 3                                                                                   |
| 4186             | Q8BFQ8           | 2                    | 5              | 15.5                  | 220    | 23277  | 7    | Parkinson disease 7 domain-containing protein 1                                                         |
| 4187             | UPI0000025ADB    | 2                    | 5              | 14.7                  | 251    | 27965  | 5.7  | apolipoprotein N                                                                                        |
| 4188             | Q9JHH9           | 2                    | 3              | 14.6                  | 205    | 22934  | 5.2  | Coatomer subunit zeta-2                                                                                 |
| 4189             | Q14AS7           | 2                    | 32             | 13.4                  | 417    | 46677  | 7.2  | Serine (Or cysteine) peptidase inhibitor, clade A, member 3C                                            |
| 4190             | Q6S9I0           | 2                    | 9              | 13.4                  | 433    | 47887  | 6.2  | Knq2 protein                                                                                            |
| 4191             | P63300           | 2                    | 2              | 12.5                  | 88     | 9537   | 8.7  | Selenoprotein W                                                                                         |
| 4192             | Q60739-2         | 2                    | 4              | 19.6                  | 219    | 24875  | 5    | Isoform 2 of BAG family molecular chaperone regulator 1                                                 |
| 4192             | Q60739           | 2                    | 4              | 12.1                  | 355    | 39740  | 8.5  | BAG family molecular chaperone regulator 1                                                              |
| 4192             | UPI0000022EA1    | 2                    | 4              | 12.1                  | 355    | 39696  | 8.5  | Bcl2-associated athanogene 1                                                                            |
| 4193             | Q8K1I3           | 2                    | 6              | 11.8                  | 203    | 23136  | 8.4  | Secreted phosphoprotein 24                                                                              |
| 4194             | Q8QZV3           | 2                    | 2              | 11.8                  | 289    | 32250  | 9    | Dci protein                                                                                             |
| 4194             | Q9DBN7           | 2                    | 2              | 11.8                  | 289    | 32223  | 9    | Putative uncharacterized protein                                                                        |
| 4195             | UPI0001E6B772    | 2                    | 12             | 10.8                  | 232    | 25487  | 10.1 | PREDICTED: 40S ribosomal protein S2-like                                                                |
| 4196             | Q8BZS4           | 2                    | 2              | 10.7                  | 382    | 43148  | 9.5  | Putative uncharacterized protein                                                                        |
| 4196             | Q9D6X6           | 2                    | 2              | 10.7                  | 382    | 43072  | 9.5  | Serine protease 23                                                                                      |
| 4197             | Q9JI75           | 2                    | 3              | 11.7                  | 231    | 26248  | 7    | Ribosylidihydroxycotinamide dehydrogenase [quinone]                                                     |
| 4197             | Q9CVI1           | 2                    | 3              | 10.2                  | 266    | 30226  | 8.9  | Putative uncharacterized protein (Fragment)                                                             |
| 4197             | Q9CVF5           | 2                    | 3              | 10.1                  | 267    | 30503  | 9    | Putative uncharacterized protein (Fragment)                                                             |
| 4198             | A2A5K2           | 2                    | 6              | 9.8                   | 441    | 49023  | 6.5  | Phospholipid transfer protein                                                                           |
| 4198             | Q4FJT5           | 2                    | 6              | 8.7                   | 493    | 54467  | 6.6  | Pltp protein                                                                                            |
| 4198             | P55065           | 2                    | 6              | 8.7                   | 493    | 54453  | 6.6  | Phospholipid transfer protein                                                                           |
| 4199             | D3YTN4           | 2                    | 2              | 9.8                   | 328    | 38044  | 6.2  | Uncharacterized protein                                                                                 |
| 4200             | Q3TEB0           | 2                    | 2              | 9.8                   | 379    | 42998  | 6.2  | Putative uncharacterized protein                                                                        |
| 4201             | Q9CQ37           | 2                    | 3              | 9.8                   | 204    | 22975  | 8    | Ubiquitin-conjugating enzyme E2 T                                                                       |
| 4202             | Q9CYT3           | 2                    | 2              | 10                    | 261    | 27274  | 9    | Putative uncharacterized protein                                                                        |
| 4202             | Q99N15           | 2                    | 2              | 10                    | 261    | 27274  | 8.8  | 17beta-hydroxysteroid dehydrogenase type 10/short chain L-3-hydroxyacyl-CoA dehydrogenase               |

Table S1. Proteins identified in the OVCAR-3 tumor supernatant by two or more unique peptides.

| Protein or Protein Group | Accession Number | Unique Peptide Count | Spectrum Count | Sequence Coverage (%) | Length | MolWt  | pI   | Descriptive Name                                                            |
|--------------------------|------------------|----------------------|----------------|-----------------------|--------|--------|------|-----------------------------------------------------------------------------|
| 4202                     | O08756           | 2                    | 2              | 10                    | 261    | 27419  | 8.4  | 3-hydroxyacyl-CoA dehydrogenase type-2                                      |
| 4202                     | A2AFQ2           | 2                    | 2              | 9.6                   | 271    | 28374  | 8.8  | Hydroxysteroid (17-beta) dehydrogenase 10                                   |
| 4203                     | P03958           | 2                    | 2              | 9.4                   | 352    | 39992  | 5.7  | Adenosine deaminase                                                         |
| 4203                     | Q4FJZ7           | 2                    | 2              | 9.4                   | 352    | 39962  | 5.8  | Ada protein                                                                 |
| 4204                     | UPI0001889CA2    | 2                    | 5              | 21.2                  | 151    | 16719  | 8.6  | UPI0001889CA2 UniRef100 entry                                               |
| 4204                     | Q8R1G6           | 2                    | 5              | 9.2                   | 349    | 37703  | 8.7  | PDZ and LIM domain protein 2                                                |
| 4205                     | B1AWZ5           | 2                    | 2              | 9.1                   | 197    | 22887  | 9.5  | Nipsnap homolog 3A (C. elegans)                                             |
| 4205                     | Q9CQE1           | 2                    | 2              | 7.3                   | 247    | 28308  | 9.5  | Protein NipSnap homolog 3A                                                  |
| 4206                     | P43276           | 2                    | 2              | 9                     | 223    | 22576  | 10.9 | Histone H1.5                                                                |
| 4207                     | Q9ESP1           | 2                    | 2              | 9                     | 221    | 23648  | 7.4  | Stromal cell-derived factor 2-like protein 1                                |
| 4208                     | P70271           | 2                    | 2              | 8.8                   | 330    | 35572  | 8    | PDZ and LIM domain protein 4                                                |
| 4208                     | Q5SWV2           | 2                    | 2              | 8.8                   | 330    | 35556  | 8    | PDZ and LIM domain 4                                                        |
| 4209                     | Q08797           | 2                    | 2              | 8.3                   | 374    | 42259  | 5.4  | SPI6                                                                        |
| 4210                     | P21300           | 2                    | 3              | 8.2                   | 316    | 35988  | 7.3  | Aldose reductase-related protein 1                                          |
| 4210                     | Q3UGS8           | 2                    | 3              | 8.2                   | 316    | 35988  | 7.6  | Putative uncharacterized protein                                            |
| 4211                     | Q91X52           | 2                    | 3              | 7.8                   | 244    | 25746  | 7.3  | L-xylulose reductase                                                        |
| 4212                     | Q9CX34           | 2                    | 3              | 7.7                   | 336    | 38159  | 5.4  | Suppressor of G2 allele of SKP1 homolog                                     |
| 4213                     | Q9WVJ3-2         | 2                    | 2              | 7.9                   | 458    | 50491  | 6.4  | Isoform 2 of Plasma glutamate carboxypeptidase                              |
| 4213                     | Q9WVJ3           | 2                    | 2              | 7.7                   | 470    | 51813  | 6.2  | Plasma glutamate carboxypeptidase                                           |
| 4214                     | Q3U6T2           | 2                    | 3              | 7.5                   | 415    | 47251  | 6.4  | Putative uncharacterized protein                                            |
| 4214                     | Q9QWR8           | 2                    | 3              | 7.5                   | 415    | 47235  | 6.4  | Alpha-N-acetylgalactosaminidase                                             |
| 4215                     | Q8R082           | 2                    | 2              | 7.3                   | 506    | 56254  | 5.4  | Dipeptidylpeptidase 7                                                       |
| 4215                     | Q9ET22           | 2                    | 2              | 7.3                   | 506    | 56270  | 5.4  | Dipeptidyl peptidase 2                                                      |
| 4216                     | E9Q0X7           | 2                    | 2              | 7.2                   | 472    | 52385  | 7.1  | Uncharacterized protein                                                     |
| 4216                     | Q3UM16           | 2                    | 2              | 7.2                   | 472    | 52351  | 7    | Putative uncharacterized protein                                            |
| 4216                     | Q9Z175           | 2                    | 2              | 4.5                   | 754    | 83681  | 6.9  | Lysyl oxidase homolog 3                                                     |
| 4216                     | Q91VN8           | 2                    | 2              | 4.5                   | 754    | 83740  | 7    | Lysyl oxidase-like 3                                                        |
| 4217                     | Q62219-7         | 2                    | 3              | 8.6                   | 350    | 38289  | 7.5  | Isoform 7 of Transforming growth factor beta-1-induced transcript 1 protein |
| 4217                     | Q62219-5         | 2                    | 3              | 7.5                   | 402    | 44059  | 7    | Isoform 5 of Transforming growth factor beta-1-induced transcript 1 protein |
| 4217                     | Q62219-4         | 2                    | 3              | 7.2                   | 415    | 45266  | 6.6  | Isoform 4 of Transforming growth factor beta-1-induced transcript 1 protein |
| 4217                     | E9Q1D5           | 2                    | 3              | 7.1                   | 422    | 46006  | 6.9  | Uncharacterized protein                                                     |
| 4217                     | Q62219           | 2                    | 3              | 6.5                   | 461    | 50101  | 6.7  | Transforming growth factor beta-1-induced transcript 1 protein              |
| 4217                     | Q62219-3         | 2                    | 3              | 6.2                   | 483    | 51988  | 7.6  | Isoform 3 of Transforming growth factor beta-1-induced transcript 1 protein |
| 4218                     | Q3UE99           | 2                    | 5              | 12.8                  | 243    | 27229  | 5.1  | Putative uncharacterized protein (Fragment)                                 |
| 4218                     | O89017           | 2                    | 5              | 7.1                   | 435    | 49373  | 6.4  | Legumain                                                                    |
| 4219                     | Q9CYG7           | 2                    | 3              | 7.1                   | 309    | 34278  | 9.1  | Mitochondrial import receptor subunit TOM34                                 |
| 4219                     | Q9CYG7-2         | 2                    | 3              | 7.1                   | 309    | 34280  | 9.1  | Isoform 2 of Mitochondrial import receptor subunit TOM34                    |
| 4220                     | A8Y5C5           | 2                    | 3              | 9.2                   | 240    | 27264  | 4.8  | Lymphocyte specific 1 (Fragment)                                            |
| 4220                     | A2A6J4           | 2                    | 3              | 6.8                   | 322    | 35763  | 5.1  | Lymphocyte specific 1                                                       |
| 4220                     | A2A6J7           | 2                    | 3              | 6.8                   | 324    | 35929  | 4.7  | Lymphocyte specific 1                                                       |
| 4220                     | P19973-2         | 2                    | 3              | 6.7                   | 328    | 36548  | 5.3  | Isoform 2 of Lymphocyte-specific protein 1                                  |
| 4220                     | P19973           | 2                    | 3              | 6.7                   | 330    | 36714  | 4.8  | Lymphocyte-specific protein 1                                               |
| 4221                     | Q71S36           | 2                    | 2              | 9.5                   | 379    | 40566  | 6    | TAGL-M splice variant                                                       |
| 4221                     | Q8VCS0-3         | 2                    | 2              | 8                     | 450    | 49063  | 6.8  | Isoform 3 of N-acetylmuramoyl-L-alanine amidase                             |
| 4221                     | Q8VCS0-2         | 2                    | 2              | 7.2                   | 501    | 54551  | 7.1  | Isoform 2 of N-acetylmuramoyl-L-alanine amidase                             |
| 4221                     | Q76L85           | 2                    | 2              | 7.2                   | 500    | 54448  | 7.1  | TagL-beta                                                                   |
| 4221                     | A2TJ61           | 2                    | 2              | 6.8                   | 530    | 57587  | 7    | Peptidoglycan recognition protein 2                                         |
| 4221                     | Q8VCS0           | 2                    | 2              | 6.8                   | 530    | 57707  | 7    | N-acetylmuramoyl-L-alanine amidase                                          |
| 4221                     | Q54A77           | 2                    | 2              | 6.8                   | 529    | 57604  | 7    | TagL-alpha                                                                  |
| 4222                     | Q64442           | 2                    | 2              | 6.7                   | 357    | 38249  | 7    | Sorbitol dehydrogenase                                                      |
| 4223                     | B1ATU5           | 2                    | 3              | 6.6                   | 482    | 54165  | 8.5  | Dihydropyridine synthase 1-like (S. cerevisiae)                             |
| 4224                     | Q91YJ2           | 2                    | 3              | 6.4                   | 450    | 51778  | 5.8  | Sorting nexin-4                                                             |
| 4225                     | P29758           | 2                    | 2              | 6.2                   | 439    | 48355  | 6.6  | Ornithine aminotransferase, mitochondrial                                   |
| 4225                     | Q3UKT3           | 2                    | 2              | 6.2                   | 439    | 48354  | 6.8  | Putative uncharacterized protein                                            |
| 4225                     | Q3UJK5           | 2                    | 2              | 6.2                   | 439    | 48418  | 6.6  | Putative uncharacterized protein                                            |
| 4226                     | Q8R1M0           | 2                    | 2              | 5.9                   | 353    | 40169  | 8.6  | UPF0361 protein C3orf37 homolog                                             |
| 4227                     | Q9D964           | 2                    | 2              | 5.9                   | 423    | 48297  | 7.9  | Glycine aminotransferase, mitochondrial                                     |
| 4228                     | Q921X9           | 2                    | 2              | 5.8                   | 517    | 59267  | 7.5  | Protein disulfide-isomerase A5                                              |
| 4229                     | Q9QZ29           | 2                    | 7              | 5.8                   | 343    | 39246  | 5    | Immunoglobulin-binding protein 1b                                           |
| 4229                     | UPI000002342D    | 2                    | 7              | 5.8                   | 343    | 39246  | 5    | immunoglobulin-binding protein 1b                                           |
| 4230                     | P33587           | 2                    | 2              | 5.2                   | 460    | 51818  | 6.4  | Vitamin K-dependent protein C                                               |
| 4231                     | Q8BH43           | 2                    | 2              | 5.2                   | 497    | 54074  | 5.5  | Wiskott-Aldrich syndrome protein family member 2                            |
| 4232                     | Q3TCN2-2         | 2                    | 4              | 6.7                   | 451    | 49936  | 5.9  | Isoform 2 of Putative phospholipase B-like 2                                |
| 4232                     | Q3TCN2           | 2                    | 4              | 5.1                   | 594    | 66290  | 6.1  | Putative phospholipase B-like 2                                             |
| 4233                     | D3YUK7           | 2                    | 4              | 5                     | 682    | 76157  | 5.6  | Uncharacterized protein                                                     |
| 4233                     | Q8CG14           | 2                    | 4              | 4.9                   | 688    | 76858  | 5.1  | Complement C1s-A subcomponent                                               |
| 4233                     | Q3T9K7           | 2                    | 4              | 4.9                   | 688    | 76485  | 5.1  | Putative uncharacterized protein                                            |
| 4233                     | E9Q6C2           | 2                    | 4              | 4.9                   | 694    | 77500  | 5.1  | Uncharacterized protein                                                     |
| 4233                     | E9Q493           | 2                    | 4              | 4.9                   | 687    | 76513  | 5.1  | Uncharacterized protein                                                     |
| 4234                     | D3YWHO           | 2                    | 5              | 19.4                  | 124    | 13460  | 7.3  | Uncharacterized protein                                                     |
| 4234                     | D3YZE3           | 2                    | 5              | 11.2                  | 214    | 23248  | 5.9  | Uncharacterized protein                                                     |
| 4234                     | Q61398           | 2                    | 5              | 5.1                   | 468    | 50168  | 8.4  | Procollagen C-endopeptidase enhancer 1                                      |
| 4234                     | Q3UN82           | 2                    | 5              | 5.1                   | 468    | 50236  | 8.4  | Putative uncharacterized protein                                            |
| 4234                     | Q3TX39           | 2                    | 5              | 5.1                   | 468    | 50169  | 8.2  | Putative uncharacterized protein                                            |
| 4234                     | D3YUE2           | 2                    | 5              | 4.9                   | 493    | 53134  | 8.5  | Uncharacterized protein                                                     |
| 4235                     | P28798           | 2                    | 2              | 4.8                   | 589    | 63458  | 6.8  | Granulins                                                                   |
| 4235                     | Q3UC19           | 2                    | 2              | 4.8                   | 589    | 63504  | 6.8  | Putative uncharacterized protein                                            |
| 4235                     | Q3TX66           | 2                    | 2              | 4.8                   | 589    | 63405  | 6.9  | Putative uncharacterized protein                                            |
| 4235                     | Q3TWT4           | 2                    | 2              | 4.8                   | 589    | 63401  | 6.7  | Putative uncharacterized protein                                            |
| 4235                     | Q3TVQ3           | 2                    | 2              | 4.8                   | 589    | 63382  | 6.9  | Putative uncharacterized protein                                            |
| 4235                     | Q9D2V3           | 2                    | 2              | 4.7                   | 602    | 64965  | 6.9  | Putative uncharacterized protein                                            |
| 4235                     | Q3UD85           | 2                    | 2              | 4.7                   | 602    | 65071  | 7.1  | Putative uncharacterized protein                                            |
| 4235                     | Q3UAJ3           | 2                    | 2              | 4.7                   | 602    | 65002  | 7    | Putative uncharacterized protein                                            |
| 4235                     | Q3U8W3           | 2                    | 2              | 4.7                   | 602    | 65019  | 6.9  | Putative uncharacterized protein                                            |
| 4235                     | Q3U5Q6           | 2                    | 2              | 4.7                   | 602    | 64965  | 6.9  | Putative uncharacterized protein                                            |
| 4235                     | Q3TW77           | 2                    | 2              | 4.7                   | 602    | 65004  | 7    | Putative uncharacterized protein                                            |
| 4236                     | P81117           | 2                    | 2              | 4.8                   | 420    | 50305  | 5.1  | Nucleobindin-2                                                              |
| 4236                     | Q3UKN6           | 2                    | 2              | 4.8                   | 420    | 50354  | 5.1  | Putative uncharacterized protein                                            |
| 4237                     | Q3ULX3           | 2                    | 6              | 4.5                   | 422    | 48013  | 6.2  | Putative uncharacterized protein                                            |
| 4237                     | Q8CB30           | 2                    | 6              | 4.5                   | 422    | 48055  | 6.2  | Putative uncharacterized protein                                            |
| 4238                     | D3YVU1           | 2                    | 2              | 4.1                   | 754    | 85382  | 6.4  | Uncharacterized protein                                                     |
| 4238                     | UPI0000022690    | 2                    | 2              | 3.8                   | 825    | 93434  | 6.2  | ubiquitin carboxyl-terminal hydrolase 16                                    |
| 4238                     | Q99LG0           | 2                    | 2              | 3.8                   | 825    | 93406  | 6.2  | Ubiquitin carboxyl-terminal hydrolase 16                                    |
| 4239                     | Q3USK2           | 2                    | 2              | 4                     | 428    | 49121  | 9.9  | Casein kinase 1, delta, isoform CRA_b                                       |
| 4240                     | Q61210-3         | 2                    | 3              | 4.7                   | 791    | 89294  | 6.1  | Isoform 3 of Rho guanine nucleotide exchange factor 1                       |
| 4240                     | Q61210-4         | 2                    | 3              | 4.3                   | 856    | 95823  | 6    | Isoform 4 of Rho guanine nucleotide exchange factor 1                       |
| 4240                     | Q61210-2         | 2                    | 3              | 4                     | 919    | 102733 | 5.6  | Isoform 2 of Rho guanine nucleotide exchange factor 1                       |
| 4240                     | Q61210           | 2                    | 3              | 4                     | 920    | 102804 | 5.6  | Rho guanine nucleotide exchange factor 1                                    |
| 4240                     | Q6KAM6           | 2                    | 3              | 3.9                   | 939    | 104635 | 5.6  | MFLJ00369 protein (Fragment)                                                |
| 4240                     | E9PUF7           | 2                    | 3              | 3.8                   | 976    | 108693 | 6.1  | Uncharacterized protein                                                     |

Table S1. Proteins identified in the OVCAR-3 tumor supernatant by two or more unique peptides.

| Protein or Group | Accession Number | Unique Peptide Count | Spectrum Count | Sequence Coverage (%) | Length | MolWt  | pI   | Descriptive Name                                                                                                                                                                                                                       |
|------------------|------------------|----------------------|----------------|-----------------------|--------|--------|------|----------------------------------------------------------------------------------------------------------------------------------------------------------------------------------------------------------------------------------------|
| 4240             | Q61210-5         | 2                    | 3              | 3.8                   | 979    | 109249 | 6.3  | Isoform 5 of Rho guanine nucleotide exchange factor 1                                                                                                                                                                                  |
| 4241             | Q91X51           | 2                    | 2              | 3.8                   | 446    | 46882  | 4.7  | Golgi reassembly-stacking protein 1                                                                                                                                                                                                    |
| 4242             | Q8K2H0           | 2                    | 27             | 3.6                   | 753    | 84060  | 6.6  | LIM domain and actin binding 1                                                                                                                                                                                                         |
| 4242             | Q9ERGO           | 2                    | 27             | 3.6                   | 753    | 84090  | 6.6  | LIM domain and actin-binding protein 1                                                                                                                                                                                                 |
| 4243             | Q922F6           | 2                    | 6              | 3.5                   | 491    | 56940  | 5.1  | Putative uncharacterized protein (Fragment)                                                                                                                                                                                            |
| 4244             | E9Q9W5           | 2                    | 2              | 3                     | 667    | 75289  | 5.6  | Uncharacterized protein                                                                                                                                                                                                                |
| 4244             | Q99JX6           | 2                    | 2              | 3                     | 667    | 75261  | 5.5  | Anxa6 protein                                                                                                                                                                                                                          |
| 4244             | Q8BSS4           | 2                    | 2              | 3                     | 673    | 75885  | 5.5  | Putative uncharacterized protein                                                                                                                                                                                                       |
| 4244             | Q3UI56           | 2                    | 2              | 3                     | 673    | 75912  | 5.5  | Putative uncharacterized protein                                                                                                                                                                                                       |
| 4244             | Q3UDK4           | 2                    | 2              | 3                     | 673    | 75983  | 5.6  | Putative uncharacterized protein                                                                                                                                                                                                       |
| 4244             | Q3TUI1           | 2                    | 2              | 3                     | 667    | 75273  | 5.6  | Putative uncharacterized protein                                                                                                                                                                                                       |
| 4244             | P14824           | 2                    | 2              | 3                     | 673    | 75886  | 5.5  | Annexin A6                                                                                                                                                                                                                             |
| 4245             | Q8JZT6           | 2                    | 2              | 3                     | 706    | 78777  | 5.9  | Adducin 3                                                                                                                                                                                                                              |
| 4245             | Q9QYB5           | 2                    | 2              | 3                     | 706    | 78763  | 5.9  | Gamma-adducin                                                                                                                                                                                                                          |
| 4246             | O54782           | 2                    | 2              | 2.4                   | 1018   | 115609 | 7.4  | Epididymis-specific alpha-mannosidase                                                                                                                                                                                                  |
| 4246             | Q3TND6           | 2                    | 2              | 2.4                   | 1018   | 115549 | 7.4  | Putative uncharacterized protein                                                                                                                                                                                                       |
| 4247             | Q9D620           | 2                    | 7              | 3.1                   | 645    | 70698  | 9.5  | Rab11 family-interacting protein 1                                                                                                                                                                                                     |
| 4247             | Q05A58           | 2                    | 7              | 3.1                   | 645    | 70684  | 9.5  | MCG2247                                                                                                                                                                                                                                |
| 4247             | E9Q8L9           | 2                    | 7              | 1.7                   | 1166   | 125025 | 5.8  | Uncharacterized protein                                                                                                                                                                                                                |
| 4248             | P97789           | 2                    | 2              | 1.6                   | 1719   | 194306 | 7.5  | 5'-3' exonuclease 1                                                                                                                                                                                                                    |
| 4248             | UPI000058C305    | 2                    | 2              | 1.6                   | 1723   | 194756 | 7.6  | 5'-3' exonuclease 1                                                                                                                                                                                                                    |
| 4248             | P97789-3         | 2                    | 2              | 1.6                   | 1687   | 191414 | 7.4  | Isoform 3 of 5'-3' exonuclease 1                                                                                                                                                                                                       |
| 4248             | P97789-2         | 2                    | 2              | 1.6                   | 1706   | 192976 | 7.5  | Isoform 2 of 5'-3' exonuclease 1                                                                                                                                                                                                       |
| 4249             | Q6P5H2           | 2                    | 3              | 1.5                   | 1864   | 207122 | 4.3  | Nestin                                                                                                                                                                                                                                 |
| 4249             | Q6P5H2-2         | 2                    | 3              | 1.5                   | 1820   | 201768 | 4.3  | Isoform 2 of Nestin                                                                                                                                                                                                                    |
| 4250             | Q3U962           | 2                    | 2              | 1.4                   | 1497   | 145018 | 6.7  | Collagen alpha-2(V) chain<br>Sushi, von Willebrand factor type A, EGF and pentraxin domain-containing protein 1                                                                                                                        |
| 4251             | A2AVA0           | 2                    | 4              | 1.3                   | 3567   | 387458 | 5.6  |                                                                                                                                                                                                                                        |
| 4252             | E9PZM4           | 2                    | 2              | 1.3                   | 1827   | 210802 | 8.1  | Uncharacterized protein                                                                                                                                                                                                                |
| 4253             | A2AA80           | 2                    | 15             | 1.2                   | 1845   | 208267 | 5.5  | Ciliary rootlet coiled-coil, rootletin                                                                                                                                                                                                 |
| 4253             | Q8CJ40-2         | 2                    | 15             | 1.2                   | 1845   | 208237 | 5.5  | Isoform 2 of Rootletin                                                                                                                                                                                                                 |
| 4253             | Q8CJ40-3         | 2                    | 15             | 1.1                   | 1988   | 224425 | 5.6  | Isoform 3 of Rootletin                                                                                                                                                                                                                 |
| 4253             | Q8CJ40           | 2                    | 15             | 1.1                   | 2009   | 226912 | 5.6  | Rootletin                                                                                                                                                                                                                              |
| 4253             | A2AA81           | 2                    | 15             | 1.1                   | 2009   | 226942 | 5.6  | Ciliary rootlet coiled-coil, rootletin                                                                                                                                                                                                 |
| 4254             | P35969           | 2                    | 4              | 1.2                   | 1333   | 149876 | 8.3  | Vascular endothelial growth factor receptor 1                                                                                                                                                                                          |
| 4255             | Q3UH53           | 2                    | 4              | 1.2                   | 2193   | 240303 | 6.8  | Protein sidekick-1                                                                                                                                                                                                                     |
| 4256             | B2RQQ5           | 2                    | 2              | 0.9                   | 2464   | 270304 | 4.8  | Microtubule-associated protein 1B                                                                                                                                                                                                      |
| 4256             | P14873           | 2                    | 2              | 0.9                   | 2464   | 270409 | 4.8  | Microtubule-associated protein 1B                                                                                                                                                                                                      |
| 4256             | E9QM11           | 2                    | 2              | 0.9                   | 2464   | 270252 | 4.8  | Uncharacterized protein                                                                                                                                                                                                                |
| 4257             | E9PV60           | 2                    | 2              | 0.8                   | 3024   | 337363 | 6.4  | Uncharacterized protein                                                                                                                                                                                                                |
| 4257             | E9Q2M9           | 2                    | 2              | 0.8                   | 3149   | 350926 | 6.3  | Uncharacterized protein                                                                                                                                                                                                                |
| 4258             | E9QPU1           | 2                    | 2              | 0.6                   | 2816   | 309471 | 5.5  | Uncharacterized protein                                                                                                                                                                                                                |
| 4258             | Q8CJZ8           | 2                    | 2              | 0.6                   | 2813   | 309266 | 5.5  | von Willebrand factor                                                                                                                                                                                                                  |
| 4258             | Q2I0J8           | 2                    | 2              | 0.6                   | 2813   | 309141 | 5.5  | VWF                                                                                                                                                                                                                                    |
| 4258             | Q2I0J7           | 2                    | 2              | 0.6                   | 2813   | 309100 | 5.5  | VWF                                                                                                                                                                                                                                    |
| 4259             | P15531           | 2                    | 40             | 89.5                  | 152    | 17149  | 6.2  | Nucleoside diphosphate kinase A                                                                                                                                                                                                        |
| 4260             | Q0VGL1           | 2                    | 18             | 61.6                  | 99     | 10741  | 6.5  | UPF0539 protein C7orf59                                                                                                                                                                                                                |
| 4261             | Q8IU66           | 2                    | 12             | 52.3                  | 130    | 13995  | 10.9 | Histone H2A type 2-B                                                                                                                                                                                                                   |
| 4262             | Q15786           | 2                    | 8              | 50.2                  | 430    | 47085  | 4.8  | Testis calpastatin                                                                                                                                                                                                                     |
| 4263             | Q95989           | 2                    | 7              | 45.3                  | 172    | 19471  | 6.4  | Diphosphoinositol polyphosphate phosphohydrolase 1                                                                                                                                                                                     |
| 4264             | Q8N3F0           | 2                    | 4              | 41.2                  | 131    | 14925  | 4.2  | UPF0452 protein C7orf41                                                                                                                                                                                                                |
| 4265             | Q8IYN2           | 2                    | 5              | 41                    | 117    | 13616  | 5.4  | Transcription elongation factor A protein-like 8                                                                                                                                                                                       |
| 4266             | Q6PIK3           | 2                    | 4              | 38                    | 121    | 13536  | 9.2  | HCG1995540, isoform CRA_b (Hcg2044074, isoform cra_d)                                                                                                                                                                                  |
| 4267             | Q8N6N7           | 2                    | 5              | 36.4                  | 88     | 9790   | 6.7  | Acyl-CoA-binding domain-containing protein 7                                                                                                                                                                                           |
| 4267             | UPI0000D60F0F    | 2                    | 5              | 36.4                  | 88     | 9758   | 6.7  | Acyl-CoA-binding domain-containing protein 7.                                                                                                                                                                                          |
| 4268             | Q9UHA2           | 2                    | 2              | 36.4                  | 77     | 8835   | 5.9  | SS18-like protein 2                                                                                                                                                                                                                    |
| 4269             | P15259           | 2                    | 2              | 33.2                  | 253    | 28766  | 8.9  | Phosphoglycerate mutase 2                                                                                                                                                                                                              |
| 4270             | P34931           | 2                    | 5              | 33.1                  | 641    | 70375  | 6    | Heat shock 70 kDa protein 1-like                                                                                                                                                                                                       |
| 4271             | Q86WV5           | 2                    | 2              | 32.8                  | 122    | 13725  | 7.9  | CST complex subunit TEN1                                                                                                                                                                                                               |
| 4272             | Q96FH0           | 2                    | 2              | 32.8                  | 119    | 13403  | 5.8  | UPF0402 protein                                                                                                                                                                                                                        |
| 4273             | D6RC73           | 2                    | 16             | 32.5                  | 80     | 9258   | 10.5 | Chemokine (C-C motif) ligand 28, isoform CRA_b                                                                                                                                                                                         |
| 4273             | Q9NRJ3           | 2                    | 16             | 20.5                  | 127    | 14280  | 10.2 | C-C motif chemokine 28                                                                                                                                                                                                                 |
| 4274             | Q68D61           | 2                    | 3              | 43.6                  | 94     | 10718  | 4.4  | MCFD2 protein                                                                                                                                                                                                                          |
| 4274             | E9PD95           | 2                    | 3              | 38                    | 108    | 12337  | 4.5  | Uncharacterized protein<br>cDNA FLJ59187, highly similar to Multiple coagulation factor deficiency protein 2 log                                                                                                                       |
| 4274             | B4DF17           | 2                    | 3              | 32.3                  | 127    | 14404  | 4.9  | deficiency protein 2 log                                                                                                                                                                                                               |
| 4274             | Q8NI22           | 2                    | 3              | 28.1                  | 146    | 16390  | 4.6  | Multiple coagulation factor deficiency protein 2                                                                                                                                                                                       |
| 4275             | B3KNS4           | 2                    | 5              | 32.1                  | 109    | 11601  | 7.8  | HCG2043597, isoform CRA_a                                                                                                                                                                                                              |
| 4275             | Q6ZRD3           | 2                    | 5              | 22.3                  | 157    | 17332  | 5.2  | cDNA FLJ44718 fis, clone BRACE3022051                                                                                                                                                                                                  |
| 4276             | Q9NSU9           | 2                    | 3              | 31.2                  | 375    | 41075  | 5.1  | Putative uncharacterized protein DKFZp434G0719 (Fragment)                                                                                                                                                                              |
| 4277             | C9J2T4           | 2                    | 3              | 31.1                  | 148    | 16903  | 5.4  | Uncharacterized protein                                                                                                                                                                                                                |
| 4277             | UPI00015E049A    | 2                    | 3              | 31.1                  | 148    | 16881  | 6.1  | UPI00015E049A UniRef100 entry                                                                                                                                                                                                          |
| 4277             | Q75575           | 2                    | 3              | 31.1                  | 148    | 16871  | 5.4  | DNA-directed RNA polymerase III subunit RPC9                                                                                                                                                                                           |
| 4278             | Q96GX2           | 2                    | 5              | 30.9                  | 97     | 10771  | 4.4  | Putative ataxin-7-like protein 3B<br>NADH dehydrogenase [ubiquinone] 1 alpha subcomplex subunit 5 (EC 1.6.5.3) (EC 1.6.99.3) (NADH-ubiquinone oxidoreductase 13 kDa-B subunit) (Complex I-13kD-B) (CI-13kD-B) (Complex I subunit B13). |
| 4279             | UPI0001B79342    | 2                    | 2              | 31.2                  | 112    | 13101  | 5.1  |                                                                                                                                                                                                                                        |
| 4279             | Q16718           | 2                    | 2              | 30.2                  | 116    | 13459  | 6    | NADH dehydrogenase [ubiquinone] 1 alpha subcomplex subunit 5                                                                                                                                                                           |
| 4279             | Q5H9R2           | 2                    | 2              | 30.2                  | 116    | 13563  | 5.6  | Putative uncharacterized protein DKFZp781K1356<br>cDNA FLJ46662 fis, clone TRACH3006800, highly similar to sapiens mucin 16, cell surface associated (MUC16), mRNA                                                                     |
| 4280             | B3KY81           | 2                    | 34             | 29.9                  | 1647   | 182990 | 8    | Protein S100-A3                                                                                                                                                                                                                        |
| 4281             | P33764           | 2                    | 5              | 29.7                  | 101    | 11713  | 4.8  |                                                                                                                                                                                                                                        |
| 4282             | Q8WY91-2         | 2                    | 10             | 33.9                  | 165    | 18627  | 7    | Isoform 2 of THAP domain-containing protein 4                                                                                                                                                                                          |
| 4282             | B5MCC0           | 2                    | 10             | 29.2                  | 192    | 21490  | 7.2  | Uncharacterized protein                                                                                                                                                                                                                |
| 4282             | Q8WY91           | 2                    | 10             | 9.7                   | 577    | 62890  | 9.3  | THAP domain-containing protein 4                                                                                                                                                                                                       |
| 4283             | Q9BRT3           | 2                    | 4              | 28.7                  | 115    | 12403  | 4.4  | Protein C17orf37                                                                                                                                                                                                                       |
| 4284             | A8MZ71           | 2                    | 2              | 27.7                  | 83     | 9388   | 9.4  | Uncharacterized protein                                                                                                                                                                                                                |
| 4284             | Q496I0           | 2                    | 2              | 27.7                  | 83     | 9426   | 9.6  | COX7A2 protein                                                                                                                                                                                                                         |
| 4284             | P14406           | 2                    | 2              | 27.7                  | 83     | 9396   | 9.7  | Cytochrome c oxidase subunit 7A2, mitochondrial                                                                                                                                                                                        |
| 4284             | D6RIE3           | 2                    | 2              | 25.3                  | 91     | 10264  | 9.7  | Uncharacterized protein                                                                                                                                                                                                                |
| 4284             | D6RGV5           | 2                    | 2              | 22.3                  | 103    | 11511  | 9.9  | Uncharacterized protein                                                                                                                                                                                                                |
| 4285             | Q9P021           | 2                    | 3              | 27.7                  | 101    | 11216  | 9.5  | Cysteine-rich PDZ-binding protein                                                                                                                                                                                                      |
| 4286             | A6NDJ8           | 2                    | 3              | 27.6                  | 181    | 20210  | 6.5  | Putative Rab-43-like protein ENSP00000330714                                                                                                                                                                                           |
| 4286             | Q86YS6           | 2                    | 3              | 23.6                  | 212    | 23339  | 5.7  | Ras-related protein Rab-43                                                                                                                                                                                                             |
| 4287             | Q53XZ0           | 2                    | 3              | 27.2                  | 125    | 13938  | 7.9  | Interferon induced transmembrane protein 1 (9-27)                                                                                                                                                                                      |
| 4288             | P09341           | 2                    | 3              | 27.1                  | 107    | 11301  | 10.4 | Growth-regulated alpha protein                                                                                                                                                                                                         |
| 4289             | Q53S33           | 2                    | 3              | 26.2                  | 107    | 12114  | 9.6  | BoA-like protein 3                                                                                                                                                                                                                     |
| 4290             | Q9NPJ8           | 2                    | 2              | 26.1                  | 142    | 16228  | 5.5  | NTF2-related export protein 2                                                                                                                                                                                                          |
| 4290             | Q9NPJ8-2         | 2                    | 2              | 19.7                  | 188    | 21050  | 7.3  | Isoform 2 of NTF2-related export protein 2                                                                                                                                                                                             |
| 4291             | Q9NZ45           | 2                    | 3              | 25.9                  | 108    | 12199  | 9.1  | CDGSH iron-sulfur domain-containing protein 1                                                                                                                                                                                          |
| 4292             | Q14508-2         | 2                    | 17             | 43.8                  | 73     | 8120   | 7.5  | Isoform 2 of WAP four-disulfide core domain protein 2                                                                                                                                                                                  |
| 4292             | Q14508-3         | 2                    | 17             | 42.1                  | 76     | 8108   | 7.8  | Isoform 3 of WAP four-disulfide core domain protein 2                                                                                                                                                                                  |

Table S1. Proteins identified in the OVCAR-3 tumor supernatant by two or more unique peptides.

| Protein or Protein Group | Accession Number | Unique Peptide Count | Spectrum Count | Sequence Coverage (%) | Length | MolWt | pI   | Descriptive Name                                                                                                 |
|--------------------------|------------------|----------------------|----------------|-----------------------|--------|-------|------|------------------------------------------------------------------------------------------------------------------|
| 4292                     | Q14508           | 2                    | 17             | 25.8                  | 124    | 12993 | 4.8  | WAP four-disulfide core domain protein 2                                                                         |
| 4293                     | Q9BTM9           | 2                    | 5              | 25.7                  | 101    | 11380 | 4.7  | Ubiquitin-related modifier 1 log                                                                                 |
| 4293                     | Q9BTM9-2         | 2                    | 5              | 17.8                  | 146    | 15815 | 5.3  | Isoform 2 of Ubiquitin-related modifier 1 log                                                                    |
| 4294                     | O00488           | 2                    | 5              | 25.4                  | 134    | 15199 | 9.8  | Zinc finger protein 593                                                                                          |
| 4295                     | A8K0V8           | 2                    | 2              | 25.2                  | 218    | 25705 | 7.4  | cDNA FLJ78039, highly similar to sapiens glutathione S-transferase M5, mRNA (cDNA clone MGC:64821 IMAGE:6193461) |
| 4296                     | P37840-2         | 2                    | 2              | 25.9                  | 112    | 11372 | 8.3  | Isoform 2-4 of Alpha-synuclein                                                                                   |
| 4296                     | E7EPV7           | 2                    | 2              | 25.2                  | 115    | 11777 | 9.2  | Uncharacterized protein                                                                                          |
| 4296                     | P37840           | 2                    | 2              | 20.7                  | 140    | 14460 | 4.7  | Alpha-synuclein                                                                                                  |
| 4297                     | Q9UL45           | 2                    | 4              | 24.4                  | 172    | 19744 | 6.4  | Pallidin                                                                                                         |
| 4298                     | P40305           | 2                    | 3              | 24.4                  | 119    | 11268 | 11.1 | Interferon alpha-inducible protein 27, mitochondrial                                                             |
| 4298                     | A8K0H0           | 2                    | 3              | 23.8                  | 122    | 11542 | 11.1 | Interferon, alpha-inducible protein 27, isoform CRA_a                                                            |
| 4298                     | E7EQA7           | 2                    | 3              | 23.8                  | 122    | 11540 | 11.1 | Uncharacterized protein                                                                                          |
| 4298                     | C9JX49           | 2                    | 3              | 23.8                  | 122    | 11542 | 10.4 | Uncharacterized protein                                                                                          |
| 4299                     | Q1M185           | 2                    | 2              | 40.7                  | 86     | 9273  | 12   | HMG2d'                                                                                                           |
| 4299                     | Q1M188           | 2                    | 2              | 38.9                  | 90     | 9742  | 11.6 | HMG2c                                                                                                            |
| 4299                     | Q1M186           | 2                    | 2              | 38                    | 92     | 10063 | 11.9 | HMG2d                                                                                                            |
| 4299                     | Q1M187           | 2                    | 2              | 34                    | 103    | 10845 | 11.8 | HMG2c'                                                                                                           |
| 4299                     | Q1M182           | 2                    | 2              | 33                    | 106    | 11456 | 12   | HMG2f                                                                                                            |
| 4299                     | P52926           | 2                    | 2              | 32.1                  | 109    | 11832 | 10.6 | High mobility group protein HMGI-C                                                                               |
| 4299                     | E7EWA2           | 2                    | 2              | 23.8                  | 147    | 16284 | 11.6 | Uncharacterized protein                                                                                          |
| 4299                     | Q1M183           | 2                    | 2              | 23.8                  | 147    | 16324 | 11.5 | HMG2e                                                                                                            |
| 4300                     | Q8WUR7           | 2                    | 2              | 23.8                  | 126    | 13322 | 9.4  | UPF0235 protein C15orf40                                                                                         |
| 4301                     | UPI000059D7E8    | 2                    | 8              | 24.4                  | 127    | 14362 | 6.7  | Uncharacterized protein C20orf27.                                                                                |
| 4301                     | E9PAL2           | 2                    | 8              | 23.3                  | 133    | 14893 | 6.8  | Uncharacterized protein                                                                                          |
| 4301                     | Q9GZN8           | 2                    | 8              | 17.8                  | 174    | 19291 | 6.8  | UPF0687 protein C20orf27                                                                                         |
| 4301                     | Q9GZN8-2         | 2                    | 8              | 15.6                  | 199    | 21645 | 7.4  | Isoform 2 of UPF0687 protein C20orf27                                                                            |
| 4302                     | Q15388           | 2                    | 9              | 22.8                  | 145    | 16298 | 8.6  | Mitochondrial import receptor subunit TOM20 log                                                                  |
| 4303                     | Q9H4X1-2         | 2                    | 2              | 26.5                  | 117    | 12924 | 4.8  | Isoform 2 of Response gene to complement 32 protein                                                              |
| 4303                     | Q9H4X1           | 2                    | 2              | 22.6                  | 137    | 14559 | 4.8  | Response gene to complement 32 protein                                                                           |
| 4304                     | Q9H204           | 2                    | 2              | 22.5                  | 178    | 19520 | 5.6  | Mediator of RNA polymerase II transcription subunit 28                                                           |
| 4305                     | Q96EL3           | 2                    | 3              | 22.3                  | 112    | 12107 | 8.8  | 39S ribosomal protein L53, mitochondrial                                                                         |
| 4306                     | P29992           | 2                    | 7              | 22                    | 359    | 42123 | 5.7  | Guanine nucleotide-binding protein subunit alpha-11                                                              |
| 4307                     | E9PIQ7           | 2                    | 2              | 21.2                  | 151    | 17167 | 5.4  | Uncharacterized protein                                                                                          |
| 4307                     | O00165-5         | 2                    | 2              | 13.9                  | 231    | 26100 | 5.2  | Isoform 5 of HCLS1-associated protein X-1                                                                        |
| 4307                     | O00165           | 2                    | 2              | 11.5                  | 279    | 31621 | 4.9  | HCLS1-associated protein X-1                                                                                     |
| 4307                     | O00165-2         | 2                    | 2              | 11.1                  | 287    | 32418 | 5    | Isoform 2 of HCLS1-associated protein X-1                                                                        |
| 4308                     | P51970           | 2                    | 3              | 20.9                  | 172    | 20105 | 7.6  | NADH dehydrogenase [ubiquinone] 1 alpha subcomplex subunit 8                                                     |
| 4309                     | Q12962           | 2                    | 3              | 20.6                  | 218    | 21711 | 6.5  | Transcription initiation factor TFIID subunit 10                                                                 |
| 4310                     | Q6F3H0           | 2                    | 2              | 21.6                  | 273    | 31684 | 6.7  | MHC class I antigen (Fragment)                                                                                   |
| 4310                     | Q4VYE6           | 2                    | 2              | 21.6                  | 273    | 31650 | 6.6  | MHC class I antigen (Fragment)                                                                                   |
| 4310                     | D5H3W2           | 2                    | 2              | 21.6                  | 273    | 31574 | 5.5  | MHC class I antigen (Fragment)                                                                                   |
| 4310                     | D2KZ35           | 2                    | 2              | 21.6                  | 273    | 31629 | 6.5  | MHC class I antigen (Fragment)                                                                                   |
| 4310                     | A7Y1U3           | 2                    | 2              | 20.3                  | 291    | 33437 | 5.8  | MHC class I antigen (Fragment)                                                                                   |
| 4310                     | UPI00006C0B15    | 2                    | 2              | 19.7                  | 299    | 34130 | 6.2  | PREDICTED: HLA class I histocompatibility antigen, A-30 alpha chain-like isoform 11                              |
| 4310                     | Q52YL7           | 2                    | 2              | 16.2                  | 365    | 40950 | 7    | MHC class I antigen                                                                                              |
| 4310                     | D5H3T1           | 2                    | 2              | 16.2                  | 365    | 40964 | 7    | MHC class I antigen                                                                                              |
| 4310                     | UPI00006C0B09    | 2                    | 2              | 15.9                  | 371    | 41348 | 6.7  | PREDICTED: HLA class I histocompatibility antigen, A-30 alpha chain-like isoform 3                               |
| 4311                     | Q86WB4           | 2                    | 2              | 29.9                  | 117    | 13773 | 9.7  | Neuromedin U (Fragment)                                                                                          |
| 4311                     | P48645           | 2                    | 2              | 20.1                  | 174    | 19741 | 8.9  | Neuromedin-U                                                                                                     |
| 4312                     | Q9H867           | 2                    | 3              | 20.1                  | 229    | 25807 | 4.9  | Uncharacterized protein C14orf138                                                                                |
| 4313                     | A8K2P7           | 2                    | 2              | 20                    | 205    | 23545 | 5.3  | cDNA FLJ77652, highly similar to sapiens START domain containing 4, sterol regulated (STAR4), mRNA               |
| 4313                     | Q96DR4           | 2                    | 2              | 20                    | 205    | 23517 | 5.3  | STAR-related lipid transfer protein 4                                                                            |
| 4314                     | B4DKK1           | 2                    | 2              | 19.8                  | 162    | 18224 | 5.4  | cDNA FLJ57120, highly similar to UBX domain-containing protein 6                                                 |
| 4314                     | O00124-3         | 2                    | 2              | 13.7                  | 233    | 26457 | 6.8  | Isoform 3 of UBX domain-containing protein 8                                                                     |
| 4314                     | O00124           | 2                    | 2              | 11.9                  | 270    | 30541 | 7.8  | UBX domain-containing protein 8                                                                                  |
| 4315                     | Q9B049           | 2                    | 2              | 26.7                  | 75     | 8631  | 8.1  | UPF0608 protein C19orf42                                                                                         |
| 4315                     | B7WNH4           | 2                    | 2              | 19.4                  | 103    | 11800 | 8.8  | Uncharacterized protein                                                                                          |
| 4316                     | Q8IVT1           | 2                    | 5              | 18.9                  | 132    | 14639 | 6    | PGPEP1 protein                                                                                                   |
| 4316                     | Q9NXJ5           | 2                    | 5              | 12                    | 209    | 23138 | 5.9  | Pyroglutamy-peptidase 1                                                                                          |
| 4317                     | B4DV65           | 2                    | 2              | 18.6                  | 156    | 17656 | 8.7  | cDNA FLJ60902, highly similar to Ubiquitin carboxyl-terminal hydrolase 3 (EC 3.1.2.15)                           |
| 4317                     | Q498Y2           | 2                    | 2              | 7.4                   | 393    | 44351 | 8.2  | USP3 protein (Fragment)                                                                                          |
| 4317                     | Q6JHV3           | 2                    | 2              | 5.8                   | 498    | 56649 | 8.3  | Ubiquitin carboxyl-terminal hydrolase                                                                            |
| 4317                     | Q9Y6I4           | 2                    | 2              | 5.6                   | 520    | 58897 | 8.2  | Ubiquitin carboxyl-terminal hydrolase 3                                                                          |
| 4318                     | O14582           | 2                    | 4              | 18.6                  | 140    | 16445 | 6.5  | Trafficking protein particle complex subunit 2                                                                   |
| 4318                     | O14582-2         | 2                    | 4              | 17.7                  | 147    | 17260 | 6.7  | Isoform 2 of Trafficking protein particle complex subunit 2                                                      |
| 4319                     | P10606           | 2                    | 2              | 18.6                  | 129    | 13696 | 8.8  | Cytochrome c oxidase subunit 5B, mitochondrial                                                                   |
| 4319                     | Q6FHM4           | 2                    | 2              | 18.6                  | 129    | 13705 | 8.8  | COX5B protein                                                                                                    |
| 4320                     | Q9H633-3         | 2                    | 2              | 20.8                  | 144    | 16544 | 10.1 | Isoform 3 of Ribonuclease P protein subunit p21                                                                  |
| 4320                     | Q5JPM0           | 2                    | 2              | 20.8                  | 144    | 16553 | 10.1 | Ribonuclease P 21kDa subunit                                                                                     |
| 4320                     | Q9H633           | 2                    | 2              | 19.5                  | 154    | 17570 | 9.5  | Ribonuclease P protein subunit p21                                                                               |
| 4320                     | B0S836           | 2                    | 2              | 18.5                  | 162    | 18366 | 9.8  | Ribonuclease P 21kDa subunit                                                                                     |
| 4320                     | Q5SU41           | 2                    | 2              | 18.5                  | 162    | 18366 | 9.6  | Ribonuclease P 21kDa subunit                                                                                     |
| 4320                     | Q5JPM3           | 2                    | 2              | 18.5                  | 162    | 18375 | 9.6  | Ribonuclease P 21kDa subunit                                                                                     |
| 4321                     | P01034           | 2                    | 14             | 18.5                  | 146    | 15799 | 8.8  | Cystatin-C                                                                                                       |
| 4322                     | D5KL87           | 2                    | 7              | 33.3                  | 45     | 5187  | 9.7  | p53 (Fragment)                                                                                                   |
| 4322                     | B4XAL0           | 2                    | 7              | 33.3                  | 45     | 5171  | 9.7  | p53 (Fragment)                                                                                                   |
| 4322                     | B5AKF7           | 2                    | 7              | 32.6                  | 46     | 5162  | 8.4  | Mutant p53 tumor suppressor (Fragment)                                                                           |
| 4322                     | A4GWB4           | 2                    | 7              | 18.3                  | 82     | 9250  | 8.1  | Cellular tumor antigen p53 (Fragment)                                                                            |
| 4322                     | Q53GA5           | 2                    | 7              | 9.5                   | 158    | 17656 | 9.3  | Cellular tumor antigen p53 (Fragment)                                                                            |
| 4322                     | E7ESS1           | 2                    | 7              | 7.5                   | 199    | 22545 | 8.1  | Cellular tumor antigen p53                                                                                       |
| 4322                     | P04637-9         | 2                    | 7              | 7                     | 214    | 24401 | 8    | Isoform 9 of Cellular tumor antigen p53                                                                          |
| 4322                     | P04637-7         | 2                    | 7              | 5.7                   | 261    | 29553 | 8.7  | Isoform 7 of Cellular tumor antigen p53                                                                          |
| 4322                     | P04637-5         | 2                    | 7              | 5                     | 302    | 33493 | 6.8  | Isoform 5 of Cellular tumor antigen p53                                                                          |
| 4322                     | P04637-6         | 2                    | 7              | 4.9                   | 307    | 34168 | 7    | Isoform 6 of Cellular tumor antigen p53                                                                          |
| 4322                     | Q1MSW8           | 2                    | 7              | 4.4                   | 343    | 37993 | 6.6  | Cellular tumor antigen p53 (Fragment)                                                                            |
| 4322                     | P04637-2         | 2                    | 7              | 4.4                   | 341    | 37826 | 5.8  | Isoform 2 of Cellular tumor antigen p53                                                                          |
| 4322                     | P04637-3         | 2                    | 7              | 4.3                   | 346    | 38501 | 6    | Isoform 3 of Cellular tumor antigen p53                                                                          |
| 4322                     | E7ERG1           | 2                    | 7              | 4.1                   | 368    | 41293 | 7.1  | Cellular tumor antigen p53                                                                                       |
| 4322                     | B4DMH2           | 2                    | 7              | 4.1                   | 368    | 41236 | 7.1  | Cellular tumor antigen p53                                                                                       |
| 4322                     | Q1MSX0           | 2                    | 7              | 3.9                   | 382    | 42627 | 6.7  | Cellular tumor antigen p53 (Fragment)                                                                            |
| 4322                     | B4DNI2           | 2                    | 7              | 3.9                   | 383    | 42808 | 6.8  | Cellular tumor antigen p53                                                                                       |
| 4322                     | Q5U0E4           | 2                    | 7              | 3.8                   | 393    | 43730 | 6.9  | Cellular tumor antigen p53                                                                                       |
| 4322                     | Q2XSC7           | 2                    | 7              | 3.8                   | 393    | 43622 | 6.6  | Cellular tumor antigen p53                                                                                       |
| 4322                     | P04637           | 2                    | 7              | 3.8                   | 393    | 43653 | 6.8  | Cellular tumor antigen p53                                                                                       |
| 4322                     | E5RMA8           | 2                    | 7              | 3.8                   | 393    | 43669 | 6.8  | Cellular tumor antigen p53                                                                                       |
| 4322                     | B6E4X6           | 2                    | 7              | 3.8                   | 393    | 43754 | 6.9  | Cellular tumor antigen p53                                                                                       |

Table S1. Proteins identified in the OVCAR-3 tumor supernatant by two or more unique peptides.

| Protein or Protein Group | Accession Number | Unique Peptide Count | Spectrum Count | Sequence Coverage (%) | Length | MolWt | pI   | Descriptive Name                                                                                                                                                                                  |
|--------------------------|------------------|----------------------|----------------|-----------------------|--------|-------|------|---------------------------------------------------------------------------------------------------------------------------------------------------------------------------------------------------|
| 4323                     | P81605           | 2                    | 3              | 20                    | 110    | 11284 | 6.5  | Dermcidin                                                                                                                                                                                         |
| 4323                     | A5JHP3           | 2                    | 3              | 18.2                  | 121    | 12414 | 8    | Dermcidin isoform 2                                                                                                                                                                               |
| 4324                     | Q8WVK7           | 2                    | 2              | 18.2                  | 121    | 14188 | 7.3  | Spindle and kinetochore-associated protein 2                                                                                                                                                      |
| 4325                     | Q14620           | 2                    | 6              | 20.4                  | 137    | 15177 | 9.3  | Insulin-like growth factor 1 (Somatomedin C), isoform CRA_c                                                                                                                                       |
| 4325                     | E9PD02           | 2                    | 6              | 17.7                  | 158    | 17762 | 9.3  | Uncharacterized protein                                                                                                                                                                           |
| 4325                     | Q59GC5           | 2                    | 6              | 15.2                  | 184    | 20618 | 8.9  | Insulin-like growth factor 1 (Somatomedin C); insulin-like growth factor 1 (Somatomedin C) variant (Fragment)                                                                                     |
| 4325                     | P05019           | 2                    | 6              | 14.4                  | 195    | 21841 | 9.7  | Insulin-like growth factor I                                                                                                                                                                      |
| 4326                     | B2R6X5           | 2                    | 49             | 17.4                  | 643    | 70958 | 6.2  | cDNA FLJ93166, highly similar to sapiens heat shock 70kDa protein 6 (HSP70B) (HSPA6), mRNA                                                                                                        |
| 4326                     | Q53FC7           | 2                    | 49             | 17.4                  | 643    | 71004 | 6.1  | Heat shock 70kDa protein 6 (HSP70B) variant (Fragment)                                                                                                                                            |
| 4326                     | P17066           | 2                    | 49             | 17.4                  | 643    | 71028 | 6.1  | Heat shock 70 kDa protein 6                                                                                                                                                                       |
| 4326                     | B3KSM6           | 2                    | 49             | 17.4                  | 643    | 70972 | 6.1  | cDNA FLJ36606 fis, clone TRACH2015654, highly similar to HEAT SHOCK 70 kDa PROTEIN 6                                                                                                              |
| 4327                     | Q6QNY0           | 2                    | 3              | 17.3                  | 202    | 21256 | 5.1  | Biogenesis of lysosome-related organelles complex 1 subunit 3                                                                                                                                     |
| 4328                     | UPI0000D4D860    | 2                    | 4              | 22.8                  | 145    | 15156 | 8.6  | claudin-7 isoform 2                                                                                                                                                                               |
| 4328                     | C9JC38           | 2                    | 4              | 17                    | 194    | 20729 | 8.4  | Uncharacterized protein                                                                                                                                                                           |
| 4328                     | O95471           | 2                    | 4              | 15.6                  | 211    | 22418 | 8.6  | Claudin-7                                                                                                                                                                                         |
| 4329                     | Q8TAC2           | 2                    | 2              | 17                    | 188    | 20756 | 7.4  | Josephin-2                                                                                                                                                                                        |
| 4330                     | Q53HB4           | 2                    | 3              | 16.2                  | 160    | 18995 | 5.3  | M-phase phosphoprotein 6 variant (Fragment)                                                                                                                                                       |
| 4330                     | Q99547           | 2                    | 3              | 16.2                  | 160    | 19024 | 5.2  | M-phase phosphoprotein 6                                                                                                                                                                          |
| 4331                     | Q5T6T5           | 2                    | 3              | 18.4                  | 125    | 14802 | 5.3  | Progesterone-associated endometrial protein (Fragment)                                                                                                                                            |
| 4331                     | UPI000059DA92    | 2                    | 3              | 18.3                  | 126    | 14915 | 5.3  | UPI000059DA92 UniRef100 entry                                                                                                                                                                     |
| 4331                     | Q5T6T0           | 2                    | 3              | 17.7                  | 130    | 14952 | 7.9  | Progesterone-associated endometrial protein (Fragment)                                                                                                                                            |
| 4331                     | A6XNE0           | 2                    | 3              | 16.1                  | 143    | 16361 | 7.4  | Glycodelin                                                                                                                                                                                        |
| 4331                     | E9PH67           | 2                    | 3              | 15.9                  | 145    | 16453 | 7.8  | Uncharacterized protein                                                                                                                                                                           |
| 4331                     | B4E3C0           | 2                    | 3              | 14.6                  | 158    | 18279 | 5.4  | cDNA FLJ52183, highly similar to Glycodelin                                                                                                                                                       |
| 4331                     | B2R4F9           | 2                    | 3              | 14.2                  | 162    | 18884 | 5.9  | cDNA FLJ92074, highly similar to sapiens progesterone-associated endometrial protein (placentalprotein 14, pregnancy-associated endometrial alpha-2-globulin, alpha uterine protein) (PAEP), mRNA |
| 4331                     | P09466           | 2                    | 3              | 12.8                  | 180    | 20624 | 5.6  | Glycodelin                                                                                                                                                                                        |
| 4332                     | B4DZZ0           | 2                    | 5              | 18.2                  | 165    | 19206 | 9.8  | cDNA FLJ52128, highly similar to PRA1 family protein 3                                                                                                                                            |
| 4332                     | E9PER8           | 2                    | 5              | 18.1                  | 166    | 19263 | 9.8  | Uncharacterized protein                                                                                                                                                                           |
| 4332                     | B3KQB4           | 2                    | 5              | 16                    | 188    | 21555 | 9.8  | cDNA FLJ90131 fis, clone HEMBB1000447, highly similar to PRA1 family protein 3                                                                                                                    |
| 4332                     | O75915           | 2                    | 5              | 16                    | 188    | 21615 | 9.8  | PRA1 family protein 3                                                                                                                                                                             |
| 4333                     | A4UCU0           | 2                    | 3              | 15.9                  | 182    | 19802 | 4.8  | DEAD box polypeptide 47 isoform 1 variant (Fragment)                                                                                                                                              |
| 4333                     | UPI00002371B1    | 2                    | 3              | 7.1                   | 406    | 45169 | 9.2  | probable ATP-dependent RNA helicase DDX47 isoform 2                                                                                                                                               |
| 4333                     | Q53GJ1           | 2                    | 3              | 6.5                   | 448    | 49882 | 9.2  | DEAD (Asp-Glu-Ala-Asp) box polypeptide 47 isoform 1 variant (Fragment)                                                                                                                            |
| 4333                     | Q9H4E3           | 2                    | 3              | 6.4                   | 455    | 50635 | 8.9  | DEAD box protein                                                                                                                                                                                  |
| 4333                     | Q9HOS4           | 2                    | 3              | 6.4                   | 455    | 50647 | 9.1  | Probable ATP-dependent RNA helicase DDX47                                                                                                                                                         |
| 4334                     | B4DUV1           | 2                    | 6              | 17.6                  | 641    | 70155 | 5.3  | cDNA FLJ53207, highly similar to sapiens fibulin 1 (FBLN1), transcript variant C, mRNA                                                                                                            |
| 4334                     | UPI000019A000    | 2                    | 6              | 16.5                  | 683    | 74462 | 5.3  | fibulin-1 isoform C precursor                                                                                                                                                                     |
| 4334                     | P23142-4         | 2                    | 6              | 16.5                  | 683    | 74434 | 5.2  | Isoform C of Fibulin-1                                                                                                                                                                            |
| 4334                     | B1AHL2           | 2                    | 6              | 15.7                  | 721    | 78329 | 5.4  | Fibulin 1                                                                                                                                                                                         |
| 4335                     | B4DS97           | 2                    | 4              | 15.7                  | 134    | 14946 | 9    | cDNA FLJ57579, highly similar to Dynactin subunit 5                                                                                                                                               |
| 4335                     | E7EWW8           | 2                    | 4              | 15.7                  | 134    | 14916 | 9    | Uncharacterized protein                                                                                                                                                                           |
| 4335                     | UPI00001FF0B1    | 2                    | 4              | 13.8                  | 152    | 16633 | 8.4  | dynactin subunit 5 isoform 3                                                                                                                                                                      |
| 4335                     | Q9BTE1           | 2                    | 4              | 11.5                  | 182    | 20127 | 8    | Dynactin subunit 5                                                                                                                                                                                |
| 4336                     | Q5EG05-2         | 2                    | 2              | 32                    | 97     | 10737 | 5.2  | Isoform 2 of Caspase recruitment domain-containing protein 16                                                                                                                                     |
| 4336                     | Q5EG05           | 2                    | 2              | 15.7                  | 197    | 22625 | 8.4  | Caspase recruitment domain-containing protein 16                                                                                                                                                  |
| 4337                     | Q9UI14           | 2                    | 2              | 15.7                  | 185    | 20648 | 7.3  | Prenylated Rab acceptor protein 1                                                                                                                                                                 |
| 4338                     | Q9UKR5           | 2                    | 2              | 15.7                  | 140    | 15864 | 9.8  | Probable ergosterol biosynthetic protein 28                                                                                                                                                       |
| 4339                     | Q3KRA9           | 2                    | 2              | 15.5                  | 238    | 26483 | 8.8  | Probable alpha-ketoglutarate-dependent dioxygenase ABH6                                                                                                                                           |
| 4340                     | Q9NSY2           | 2                    | 2              | 15.5                  | 213    | 23794 | 6.7  | STAR-related lipid transfer protein 5                                                                                                                                                             |
| 4341                     | Q9NUS5           | 2                    | 2              | 15.5                  | 200    | 22522 | 6.9  | Protein C20orf29                                                                                                                                                                                  |
| 4342                     | B3KVZ3           | 2                    | 4              | 15.4                  | 228    | 26239 | 4.9  | Centromere protein H, isoform CRA_b                                                                                                                                                               |
| 4342                     | Q9H3R5           | 2                    | 4              | 14.2                  | 247    | 28481 | 5.3  | Centromere protein H                                                                                                                                                                              |
| 4343                     | C9J4K0           | 2                    | 3              | 18.4                  | 190    | 21356 | 9.7  | Uncharacterized protein                                                                                                                                                                           |
| 4343                     | B4E2G9           | 2                    | 3              | 15.4                  | 228    | 25675 | 10.1 | cDNA FLJ55159                                                                                                                                                                                     |
| 4343                     | Q9BVC5           | 2                    | 3              | 15.1                  | 232    | 25858 | 9.7  | Ashwin                                                                                                                                                                                            |
| 4344                     | O75380           | 2                    | 3              | 21                    | 124    | 13712 | 8.3  | NADH dehydrogenase [ubiquinone] iron-sulfur protein 6, mitochondrial                                                                                                                              |
| 4344                     | D6RBT3           | 2                    | 3              | 15.1                  | 172    | 18752 | 8.7  | Uncharacterized protein                                                                                                                                                                           |
| 4345                     | Q9NYG6           | 2                    | 2              | 15.7                  | 198    | 22099 | 7    | Cyclin-dependent kinase inhibitor p27kip1                                                                                                                                                         |
| 4345                     | P46527           | 2                    | 2              | 15.7                  | 198    | 22073 | 7    | Cyclin-dependent kinase inhibitor 1B                                                                                                                                                              |
| 4345                     | E7ES52           | 2                    | 2              | 15.1                  | 205    | 23183 | 6.6  | Uncharacterized protein                                                                                                                                                                           |
| 4346                     | Q9H7X7           | 2                    | 2              | 15.1                  | 185    | 20835 | 5.1  | Rab-like protein 5                                                                                                                                                                                |
| 4347                     | Q96B54           | 2                    | 4              | 14.9                  | 188    | 20481 | 4.2  | Zinc finger protein 428                                                                                                                                                                           |
| 4348                     | C9JNG8           | 2                    | 8              | 14.8                  | 183    | 20699 | 7.9  | Uncharacterized protein                                                                                                                                                                           |
| 4348                     | Q8NI32           | 2                    | 8              | 14.8                  | 183    | 20656 | 7.8  | Ly6/PLAUR domain-containing protein 6B                                                                                                                                                            |
| 4348                     | Q8NI32-2         | 2                    | 8              | 13                    | 207    | 23340 | 7.9  | Isoform 2 of Ly6/PLAUR domain-containing protein 6B                                                                                                                                               |
| 4349                     | Q96G53           | 2                    | 2              | 14.8                  | 237    | 26001 | 5.6  | SLC27A4 protein                                                                                                                                                                                   |
| 4349                     | A6NIF3           | 2                    | 2              | 14.7                  | 238    | 26169 | 5.9  | Uncharacterized protein                                                                                                                                                                           |
| 4349                     | Q9BTA1           | 2                    | 2              | 13.6                  | 258    | 28826 | 5.6  | Putative uncharacterized protein (Fragment)                                                                                                                                                       |
| 4349                     | B3KNH1           | 2                    | 2              | 6.8                   | 511    | 57195 | 7    | cDNA FLJ14598 fis, clone NT2RM4002558, highly similar to Long-chain fatty acid transport protein 4 (EC 6.2.1.-)                                                                                   |
| 4349                     | Q6P1M0           | 2                    | 2              | 5.4                   | 643    | 72064 | 8.5  | Long-chain fatty acid transport protein 4                                                                                                                                                         |
| 4350                     | O95832           | 2                    | 6              | 14.7                  | 211    | 22744 | 8.1  | Claudin-1                                                                                                                                                                                         |
| 4350                     | Q7Z4X9           | 2                    | 6              | 14.7                  | 211    | 22721 | 8.1  | Claudin-2                                                                                                                                                                                         |
| 4351                     | Q86YL5           | 2                    | 2              | 15.7                  | 185    | 20403 | 6    | Uncharacterized protein C8orf42                                                                                                                                                                   |
| 4351                     | B6VF03           | 2                    | 2              | 14.6                  | 198    | 22285 | 8.2  | TDRP2                                                                                                                                                                                             |
| 4352                     | B7Z2P6           | 2                    | 2              | 14.6                  | 751    | 84779 | 5.1  | cDNA FLJ55296, highly similar to sapiens WD repeat domain 42A (WDR42A), mRNA                                                                                                                      |
| 4353                     | A8K0H3           | 2                    | 26             | 14.5                  | 159    | 17780 | 11.7 | cDNA FLJ78093, highly similar to sapiens ribosomal protein L29 (RPL29), mRNA                                                                                                                      |
| 4353                     | P47914           | 2                    | 26             | 14.5                  | 159    | 17752 | 11.7 | 60S ribosomal protein L29                                                                                                                                                                         |
| 4353                     | Q6IPI1           | 2                    | 26             | 14.3                  | 161    | 17951 | 11.7 | Ribosomal protein L29                                                                                                                                                                             |
| 4354                     | A6NGX6           | 2                    | 2              | 14.4                  | 195    | 22638 | 4.6  | Uncharacterized protein                                                                                                                                                                           |
| 4354                     | Q9BT43           | 2                    | 2              | 12.8                  | 218    | 25334 | 4.5  | DNA-directed RNA polymerase III subunit RPC7-like                                                                                                                                                 |
| 4355                     | Q5T6J7           | 2                    | 2              | 14.4                  | 187    | 20578 | 6.2  | Probable gluconokinase                                                                                                                                                                            |
| 4355                     | Q5T6J7-2         | 2                    | 2              | 11.7                  | 230    | 25297 | 8.5  | Isoform 2 of Probable gluconokinase                                                                                                                                                               |
| 4356                     | B4DJG2           | 2                    | 3              | 14.2                  | 162    | 18489 | 9.6  | cDNA FLJ55079, highly similar to sapiens lectin, galactoside-binding, soluble, 8, transcript variant 4, mRNA                                                                                      |
| 4356                     | E9PN19           | 2                    | 3              | 7.9                   | 290    | 32632 | 7.2  | Uncharacterized protein                                                                                                                                                                           |
| 4356                     | Q96QS7           | 2                    | 3              | 7.7                   | 300    | 33739 | 8.8  | Lymphocyte/NHL galectin-8 short isoform                                                                                                                                                           |
| 4356                     | E7EQ99           | 2                    | 3              | 7.7                   | 300    | 33985 | 9.2  | Uncharacterized protein                                                                                                                                                                           |
| 4356                     | O00214           | 2                    | 3              | 7.3                   | 317    | 35808 | 8.3  | Galectin-8                                                                                                                                                                                        |
| 4356                     | Q59E97           | 2                    | 3              | 6.8                   | 338    | 38200 | 8.9  | Galectin-8 variant (Fragment)                                                                                                                                                                     |
| 4356                     | O00214-2         | 2                    | 3              | 6.4                   | 359    | 40397 | 9    | Isoform 2 of Galectin-8                                                                                                                                                                           |

Table S1. Proteins identified in the OVCAR-3 tumor supernatant by two or more unique peptides.

| Protein or Group | Accession Number | Unique Peptide Count | Spectrum Count | Sequence Coverage (%) | Length | MolWt  | pI   | Descriptive Name                                                                                                                                     |
|------------------|------------------|----------------------|----------------|-----------------------|--------|--------|------|------------------------------------------------------------------------------------------------------------------------------------------------------|
| 4356             | C9JNF5           | 2                    | 3              | 6.4                   | 357    | 40355  | 8.4  | Uncharacterized protein                                                                                                                              |
| 4357             | Q6ISL4           | 2                    | 2              | 14.3                  | 133    | 15473  | 5.1  | RBP2 protein (Fragment)                                                                                                                              |
| 4357             | P50120           | 2                    | 2              | 14.2                  | 134    | 15707  | 5.4  | Retinol-binding protein 2                                                                                                                            |
| 4358             | Q99714           | 2                    | 2              | 14.2                  | 261    | 26923  | 7.8  | 3-hydroxyacyl-CoA dehydrogenase type-2                                                                                                               |
| 4359             | Q05D20           | 2                    | 27             | 13.9                  | 373    | 41613  | 11.6 | THRAP3 protein (Fragment)                                                                                                                            |
| 4359             | Q7Z5U1           | 2                    | 27             | 13.9                  | 373    | 41600  | 11.5 | THRAP3 protein (Fragment)                                                                                                                            |
| 4359             | Q6PJV4           | 2                    | 27             | 13.9                  | 375    | 41858  | 11.5 | THRAP3 protein (Fragment)                                                                                                                            |
| 4360             | Q94811           | 2                    | 10             | 13.7                  | 219    | 23694  | 9.4  | Tubulin polymerization-promoting protein                                                                                                             |
| 4361             | Q9NV56           | 2                    | 2              | 13.7                  | 204    | 22417  | 5.8  | MRG-binding protein<br>cDNA FLJ60870, highly similar to Methyltransferase-like protein 2 (EC 2.1.1.-)                                                |
| 4362             | B4DSX4           | 2                    | 2              | 13.6                  | 242    | 27442  | 6.8  | (EC 2.1.1.-)                                                                                                                                         |
| 4362             | Q6P1Q9-2         | 2                    | 2              | 10.5                  | 313    | 36057  | 5.9  | Isoform 2 of Methyltransferase-like protein 2B                                                                                                       |
| 4362             | Q6P1Q9           | 2                    | 2              | 8.7                   | 378    | 43426  | 5.9  | Methyltransferase-like protein 2B<br>UDP-N-acetylglucosamine transferase subunit ALG13 log isoform 4                                                 |
| 4363             | UPI0001BEF277    | 2                    | 2              | 22.6                  | 133    | 14773  | 6.7  | Isoform 2 of UDP-N-acetylglucosamine transferase subunit ALG13 log                                                                                   |
| 4363             | Q9NP73-2         | 2                    | 2              | 18.2                  | 165    | 18225  | 6.5  | Uncharacterized protein                                                                                                                              |
| 4363             | D6RE84           | 2                    | 2              | 13.5                  | 222    | 24293  | 7.8  | Uncharacterized protein                                                                                                                              |
| 4363             | Q9NP73           | 2                    | 2              | 2.6                   | 1137   | 126056 | 6.7  | UDP-N-acetylglucosamine transferase subunit ALG13 log                                                                                                |
| 4364             | Q9NSK7-3         | 2                    | 6              | 17.8                  | 107    | 11113  | 8.5  | Isoform 3 of Uncharacterized protein C19orf12                                                                                                        |
| 4364             | Q9NSK7           | 2                    | 6              | 13.5                  | 141    | 15007  | 5.9  | Uncharacterized protein C19orf12                                                                                                                     |
| 4365             | Q8N4B8           | 2                    | 8              | 15.9                  | 195    | 22725  | 6.9  | Golgi SNAP receptor complex member 2                                                                                                                 |
| 4365             | O14653-2         | 2                    | 8              | 14.6                  | 213    | 24584  | 8.5  | Isoform B of Golgi SNAP receptor complex member 2                                                                                                    |
| 4365             | O14653           | 2                    | 8              | 14.6                  | 212    | 24775  | 8.1  | Golgi SNAP receptor complex member 2                                                                                                                 |
| 4365             | E7EQ34           | 2                    | 8              | 13.4                  | 232    | 26624  | 7.7  | Uncharacterized protein                                                                                                                              |
| 4366             | Q9BQD3           | 2                    | 4              | 13.6                  | 176    | 19668  | 4.9  | UPF0459 protein C19orf50                                                                                                                             |
| 4366             | Q7Z4E2           | 2                    | 4              | 13.4                  | 179    | 20149  | 5.8  | MSTP096<br>cDNA FLJ12546 fis, clone NT2RM4000616, moderately similar to ACETYL-COENZYME A SYNTHETASE (EC 6.2.1.1)                                    |
| 4367             | Q9H9U4           | 2                    | 4              | 13.1                  | 442    | 49368  | 5.7  | ACETYL-COENZYME A SYNTHETASE (EC 6.2.1.1)                                                                                                            |
| 4368             | P32929-2         | 2                    | 2              | 13.3                  | 361    | 39505  | 6.9  | Isoform 2 of Cystathionine gamma-lyase<br>cDNA FLJ50357, highly similar to Cystathionine gamma-lyase (EC 4.4.1.1)                                    |
| 4368             | B4E1R2           | 2                    | 2              | 12.9                  | 373    | 41286  | 6.9  | Uncharacterized protein                                                                                                                              |
| 4368             | E9PDV0           | 2                    | 2              | 12.9                  | 373    | 41260  | 6.9  | Uncharacterized protein                                                                                                                              |
| 4368             | P32929           | 2                    | 2              | 11.9                  | 405    | 44508  | 6.7  | Cystathionine gamma-lyase                                                                                                                            |
| 4369             | Q58FG1           | 2                    | 3              | 12.9                  | 418    | 47712  | 5.2  | Putative heat shock protein HSP 90-alpha A4                                                                                                          |
| 4370             | P50453           | 2                    | 2              | 12.8                  | 376    | 42404  | 5.9  | Serpin B9                                                                                                                                            |
| 4371             | Q9BVC3           | 2                    | 2              | 12.7                  | 393    | 44825  | 5.2  | Sister chromatid cohesion protein DCC1                                                                                                               |
| 4372             | Q9NXR1-2         | 2                    | 5              | 13.1                  | 335    | 37721  | 5.2  | Isoform 2 of Nuclear distribution protein nudE log 1                                                                                                 |
| 4372             | Q9NXR1           | 2                    | 5              | 12.7                  | 346    | 38808  | 5.3  | Nuclear distribution protein nudE log 1                                                                                                              |
| 4373             | UPI0001E8F293    | 2                    | 3              | 18.8                  | 186    | 20753  | 5.4  | UPI0001E8F293 UniRef100 entry                                                                                                                        |
| 4373             | Q5T013-4         | 2                    | 3              | 17.2                  | 204    | 22616  | 5.8  | Isoform 4 of Unitive hydroxypyruvate isomerase                                                                                                       |
| 4373             | Q5T015           | 2                    | 3              | 15.3                  | 229    | 25229  | 6.5  | Hydroxypyruvate isomerase log (E. coli)                                                                                                              |
| 4373             | Q5T013           | 2                    | 3              | 12.6                  | 277    | 30406  | 5.5  | Putative hydroxypyruvate isomerase<br>cDNA FLJ57657, highly similar to Charged multivesicular body protein 1a                                        |
| 4374             | B4DXN3           | 2                    | 2              | 12.4                  | 137    | 15301  | 9.5  | Charged multivesicular body protein 1a                                                                                                               |
| 4374             | Q9HD42           | 2                    | 2              | 8.7                   | 196    | 21703  | 8.1  | Charged multivesicular body protein 1a                                                                                                               |
| 4375             | O00560-3         | 2                    | 3              | 12.7                  | 292    | 31762  | 7.5  | Isoform 3 of Syntenin-1                                                                                                                              |
| 4375             | O00560           | 2                    | 3              | 12.4                  | 298    | 32444  | 7.5  | Syntenin-1                                                                                                                                           |
| 4376             | P51151           | 2                    | 3              | 12.4                  | 201    | 22838  | 5.5  | Ras-related protein Rab-9A                                                                                                                           |
| 4377             | B1AHE1           | 2                    | 2              | 12.5                  | 256    | 28957  | 5.8  | TRIO and F-actin binding protein (Fragment)                                                                                                          |
| 4377             | B1AHD5           | 2                    | 2              | 12.2                  | 262    | 29540  | 6.9  | TRIO and F-actin binding protein (Fragment)                                                                                                          |
| 4377             | B1AHD8           | 2                    | 2              | 12.2                  | 262    | 29615  | 8.1  | TRIO and F-actin binding protein (Fragment)                                                                                                          |
| 4377             | B1AHD9           | 2                    | 2              | 12.1                  | 265    | 29582  | 8    | TRIO and F-actin binding protein (Fragment)                                                                                                          |
| 4377             | B1AHD6           | 2                    | 2              | 8.6                   | 372    | 41618  | 7.1  | TRIO and F-actin binding protein                                                                                                                     |
| 4377             | UPI000045707F    | 2                    | 2              | 7.4                   | 431    | 47624  | 9.1  | TRIO and F-actin-binding protein isoform 2                                                                                                           |
| 4377             | E9PC58           | 2                    | 2              | 4.9                   | 652    | 74048  | 6.9  | Uncharacterized protein                                                                                                                              |
| 4377             | Q9H2D6           | 2                    | 2              | 1.4                   | 2365   | 261373 | 8.5  | TRIO and F-actin-binding protein                                                                                                                     |
| 4378             | Q5QP81           | 2                    | 2              | 12.3                  | 211    | 22540  | 9.3  | Zinc finger, AN1-type domain 5 (Fragment)                                                                                                            |
| 4378             | O76080           | 2                    | 2              | 12.2                  | 213    | 23132  | 8.5  | AN1-type zinc finger protein 5                                                                                                                       |
| 4379             | Q53S08           | 2                    | 3              | 12.2                  | 254    | 28242  | 6.7  | Putative uncharacterized protein RAB6C                                                                                                               |
| 4379             | Q9H0N0           | 2                    | 3              | 12.2                  | 254    | 28355  | 7.7  | Ras-related protein Rab-6C                                                                                                                           |
| 4380             | Q6P1K2           | 2                    | 2              | 12.2                  | 205    | 23339  | 5.5  | Polyamine-modulated factor 1                                                                                                                         |
| 4380             | Q6P1K2-2         | 2                    | 2              | 12.1                  | 207    | 22946  | 6.1  | Isoform 2 of Polyamine-modulated factor 1                                                                                                            |
| 4380             | UPI000046FD09    | 2                    | 2              | 11.8                  | 211    | 23769  | 7.3  | PMF1-BGLAP protein isoform 2                                                                                                                         |
| 4381             | Q8IY26           | 2                    | 4              | 12.2                  | 295    | 32194  | 10   | Presqualene diphosphate phosphatase                                                                                                                  |
| 4382             | Q92623           | 2                    | 2              | 12.2                  | 222    | 24379  | 9    | Tetrapeptide repeat protein 9A                                                                                                                       |
| 4383             | Q8NAV1           | 2                    | 4              | 11.9                  | 312    | 37477  | 10   | Pre-mRNA-splicing factor 38A                                                                                                                         |
| 4384             | Q9H488           | 2                    | 2              | 11.9                  | 388    | 43956  | 8.5  | GDP-glucose protein O-fucosyltransferase 1                                                                                                           |
| 4385             | Q5VXM9           | 2                    | 2              | 17.3                  | 208    | 24158  | 9.5  | Brix domain containing 1 (Fragment)                                                                                                                  |
| 4385             | Q5VXN0           | 2                    | 2              | 16.8                  | 214    | 24605  | 9.6  | Brix domain containing 1 (Fragment)                                                                                                                  |
| 4385             | B4DWS5           | 2                    | 2              | 14.3                  | 251    | 28956  | 9.8  | cDNA FLJ57639, highly similar to Brix domain-containing protein 1<br>cDNA FLJ76924, highly similar to sapiens brix domain containing 1 (BXDC1), mRNA |
| 4385             | A8K800           | 2                    | 2              | 11.8                  | 306    | 35573  | 10   | Ribosome production factor 2 log                                                                                                                     |
| 4385             | Q9H7B2           | 2                    | 2              | 11.8                  | 306    | 35583  | 10   | Ribosome production factor 2 log                                                                                                                     |
| 4386             | Q8WV07           | 2                    | 4              | 19                    | 137    | 15354  | 5.8  | Oral cancer-overexpressed protein 1<br>cDNA FLJ58145, highly similar to Oral cancer overexpressed protein 1                                          |
| 4386             | B4DFA5           | 2                    | 4              | 11.8                  | 221    | 24768  | 7.2  | Aldo-keto reductase family 1, member C3 (3-alpha hydroxysteroid dehydrogenase, type II), isoform CRA_c                                               |
| 4387             | B4DL37           | 2                    | 3              | 11.8                  | 204    | 23364  | 8    | Type II 3a-hydroxysteroid dehydrogenase variant                                                                                                      |
| 4387             | Q2XPP3           | 2                    | 3              | 7.4                   | 323    | 36768  | 8.1  | Aldo-keto reductase family 1 member C3                                                                                                               |
| 4387             | P42330           | 2                    | 3              | 7.4                   | 323    | 36853  | 7.9  | Aldo-keto reductase family 1 member C3                                                                                                               |
| 4388             | Q96EY5-3         | 2                    | 3              | 12.5                  | 257    | 27050  | 9.4  | Isoform 3 of Multivesicular body subunit 12A                                                                                                         |
| 4388             | A8K0C2           | 2                    | 3              | 11.7                  | 273    | 28809  | 8.9  | cDNA FLJ75950                                                                                                                                        |
| 4388             | Q96EY5           | 2                    | 3              | 11.7                  | 273    | 28783  | 8.9  | Multivesicular body subunit 12A                                                                                                                      |
| 4388             | E9POA6           | 2                    | 3              | 11.7                  | 273    | 28703  | 9.6  | Uncharacterized protein                                                                                                                              |
| 4389             | Q96IY1           | 2                    | 3              | 11.7                  | 281    | 32162  | 6.8  | Kinetochores-associated protein NSL1 log                                                                                                             |
| 4390             | Q8TBF4           | 2                    | 2              | 11.5                  | 217    | 24592  | 8.5  | Zinc finger CCHC-type and RNA-binding motif-containing protein 1                                                                                     |
| 4391             | Q96CG3           | 2                    | 2              | 11.4                  | 184    | 21445  | 5.1  | TRAF-interacting protein with FHA domain-containing protein A                                                                                        |
| 4392             | Q9BQ69           | 2                    | 2              | 11.4                  | 325    | 35505  | 9.5  | MACRO domain-containing protein 1                                                                                                                    |
| 4393             | UPI0001E8F63E    | 2                    | 3              | 13.3                  | 225    | 25941  | 5.5  | UPI0001E8F63E UniRef100 entry                                                                                                                        |
| 4393             | E5RH53           | 2                    | 3              | 12.1                  | 248    | 28634  | 8    | Uncharacterized protein                                                                                                                              |
| 4393             | B4DNF5           | 2                    | 3              | 11.1                  | 271    | 30833  | 8.8  | cDNA FLJ59260, highly similar to Protein FAM82B                                                                                                      |
| 4393             | E7EVI2           | 2                    | 3              | 11.1                  | 271    | 30847  | 8.9  | Uncharacterized protein                                                                                                                              |
| 4393             | B4DZV6           | 2                    | 3              | 10.6                  | 284    | 32365  | 8.9  | Uncharacterized protein                                                                                                                              |
| 4393             | Q96DB5           | 2                    | 3              | 9.6                   | 314    | 35808  | 8.5  | Regulator of microtubule dynamics protein 1                                                                                                          |
| 4394             | E9PC70           | 2                    | 3              | 10.7                  | 242    | 26818  | 5.1  | Uncharacterized protein                                                                                                                              |
| 4394             | Q7Z5N2           | 2                    | 3              | 10.7                  | 242    | 26788  | 5.1  | Kanqai 1                                                                                                                                             |
| 4394             | Q6LE70           | 2                    | 3              | 9.7                   | 267    | 29644  | 5.2  | KAI1 protein (Fragment)                                                                                                                              |
| 4394             | P27701           | 2                    | 3              | 9.7                   | 267    | 29626  | 5.2  | CD82 antigen                                                                                                                                         |
| 4395             | C9JU10           | 2                    | 2              | 10.5                  | 258    | 28659  | 7    | Uncharacterized protein                                                                                                                              |
| 4395             | Q86YJ6-3         | 2                    | 2              | 7                     | 384    | 42718  | 6.8  | Isoform 3 of Threonine synthase-like 2                                                                                                               |
| 4395             | Q86YJ6-2         | 2                    | 2              | 6.7                   | 405    | 45037  | 6.5  | Isoform 2 of Threonine synthase-like 2                                                                                                               |



Table S1. Proteins identified in the OVCAR-3 tumor supernatant by two or more unique peptides.

| Protein or Protein Group | Accession Number | Unique Peptide Count | Spectrum Count | Sequence Coverage (%) | Length | MolWt | pI   | Descriptive Name                                                                                                                          |
|--------------------------|------------------|----------------------|----------------|-----------------------|--------|-------|------|-------------------------------------------------------------------------------------------------------------------------------------------|
| 4395                     | Q86YJ6-4         | 2                    | 2              | 6.4                   | 423    | 47428 | 6.2  | Isoform 4 of Threonine synthase-like 2                                                                                                    |
| 4395                     | Q86YJ6           | 2                    | 2              | 5.6                   | 484    | 54116 | 6.5  | Threonine synthase-like 2                                                                                                                 |
| 4396                     | Q6IQ49-3         | 2                    | 2              | 12.6                  | 356    | 39367 | 5    | Isoform 3 of UPF0667 protein C1orf55                                                                                                      |
| 4396                     | C9JIQ2           | 2                    | 2              | 10.3                  | 439    | 48528 | 6.2  | Uncharacterized protein                                                                                                                   |
| 4396                     | Q6IQ49-2         | 2                    | 2              | 10.3                  | 439    | 48505 | 6.1  | Isoform 2 of UPF0667 protein C1orf55                                                                                                      |
| 4396                     | Q6IQ49           | 2                    | 2              | 10                    | 451    | 49742 | 6    | UPF0667 protein C1orf55                                                                                                                   |
| 4397                     | Q9UII2           | 2                    | 6              | 10.4                  | 106    | 12249 | 9.4  | ATPase inhibitor, mitochondrial                                                                                                           |
| 4397                     | Q5JXL8           | 2                    | 6              | 10.3                  | 107    | 12405 | 9.6  | Putative uncharacterized protein DKFZp564G0422                                                                                            |
| 4398                     | B2RC46           | 2                    | 2              | 10.2                  | 226    | 25329 | 5.6  | cDNA, FLJ95848                                                                                                                            |
| 4398                     | Q9NRH1           | 2                    | 2              | 10.2                  | 226    | 25299 | 5.6  | Uncharacterized protein C7orf36                                                                                                           |
| 4399                     | B3KM50           | 2                    | 3              | 10.2                  | 353    | 39145 | 6    | cDNA FLJ10310 fis, clone NT2RM2000322, highly similar to sapiens KIAA0859 protein                                                         |
| 4399                     | Q8N6R0-2         | 2                    | 3              | 9.1                   | 396    | 44563 | 5.6  | Isoform 5 of Methyltransferase-like protein 13                                                                                            |
| 4399                     | Q8N6R0-1         | 2                    | 3              | 6.6                   | 543    | 61128 | 6.1  | Isoform 4 of Methyltransferase-like protein 13                                                                                            |
| 4399                     | Q8N6R0-3         | 2                    | 3              | 5.9                   | 613    | 68689 | 6.7  | Isoform 3 of Methyltransferase-like protein 13                                                                                            |
| 4399                     | B3KNM8           | 2                    | 3              | 5.9                   | 613    | 68657 | 6.7  | cDNA FLJ14980 fis, clone Y79AA1000181, highly similar to sapiens CGI-01 protein mRNA                                                      |
| 4399                     | Q8N6R0-4         | 2                    | 3              | 5.6                   | 642    | 72261 | 7    | Isoform 2 of Methyltransferase-like protein 13                                                                                            |
| 4399                     | Q8N6R0           | 2                    | 3              | 5.2                   | 699    | 78768 | 6.7  | Methyltransferase-like protein 13                                                                                                         |
| 4399                     | B4E2X3           | 2                    | 3              | 5.2                   | 698    | 78688 | 6.7  | cDNA FLJ56024                                                                                                                             |
| 4399                     | B3KNIO           | 2                    | 3              | 5.2                   | 699    | 78690 | 6.5  | cDNA FLJ14646 fis, clone NT2RP2001883, highly similar to sapiens CGI-01 protein mRNA                                                      |
| 4400                     | Q9P016-2         | 2                    | 2              | 13.9                  | 166    | 18812 | 9.3  | Isoform 2 of Thymocyte nuclear protein 1                                                                                                  |
| 4400                     | Q9P016           | 2                    | 2              | 10.2                  | 225    | 25697 | 9.2  | Thymocyte nuclear protein 1                                                                                                               |
| 4401                     | A8K883           | 2                    | 5              | 10.1                  | 524    | 59228 | 5    | cDNA FLJ77590, highly similar to sapiens leucine rich repeat containing 1, mRNA                                                           |
| 4401                     | Q9BTT6           | 2                    | 5              | 10.1                  | 524    | 59242 | 5    | Leucine-rich repeat-containing protein 1                                                                                                  |
| 4402                     | Q96Q83           | 2                    | 2              | 10.1                  | 286    | 33375 | 8.4  | Alpha-ketoglutarate-dependent dioxygenase alkB log 3                                                                                      |
| 4403                     | E7ESK6           | 2                    | 5              | 11.5                  | 165    | 18388 | 6    | Syndecan                                                                                                                                  |
| 4403                     | B7Z5H2           | 2                    | 5              | 11                    | 172    | 18914 | 4.8  | Syndecan                                                                                                                                  |
| 4403                     | B4DO56           | 2                    | 5              | 9.9                   | 192    | 21179 | 4.9  | Syndecan                                                                                                                                  |
| 4403                     | P34741           | 2                    | 5              | 9.5                   | 201    | 22160 | 4.9  | Syndecan-2                                                                                                                                |
| 4404                     | Q5BJH7-2         | 2                    | 2              | 10.2                  | 283    | 31175 | 7.4  | Isoform 2 of Protein YIF1B                                                                                                                |
| 4404                     | E9PB34           | 2                    | 2              | 9.7                   | 299    | 32825 | 8.6  | Uncharacterized protein                                                                                                                   |
| 4404                     | Q5BJH7-3         | 2                    | 2              | 9.3                   | 311    | 33965 | 8.8  | Isoform 3 of Protein YIF1B                                                                                                                |
| 4404                     | Q5BJH7           | 2                    | 2              | 9.2                   | 314    | 34435 | 9.2  | Protein YIF1B                                                                                                                             |
| 4405                     | Q5T8V1           | 2                    | 2              | 9.7                   | 238    | 27809 | 7.8  | Chromosome 9 open reading frame 41 (Fragment)                                                                                             |
| 4405                     | Q8N4J0           | 2                    | 2              | 5.6                   | 409    | 47186 | 6.3  | UPF0586 protein C9orf41                                                                                                                   |
| 4406                     | Q86U90           | 2                    | 2              | 9.7                   | 279    | 29328 | 8.6  | YrdC domain-containing protein, mitochondrial                                                                                             |
| 4407                     | Q9H469           | 2                    | 5              | 9.7                   | 300    | 32998 | 7.4  | F-box only protein 37                                                                                                                     |
| 4408                     | A8MZA9           | 2                    | 5              | 9.6                   | 270    | 30387 | 4.4  | Uncharacterized protein                                                                                                                   |
| 4408                     | Q96EV8           | 2                    | 5              | 7.4                   | 351    | 39493 | 4.7  | Dysbindin                                                                                                                                 |
| 4409                     | B4E2D2           | 2                    | 4              | 13.7                  | 263    | 30000 | 5.7  | cDNA FLJ58874, highly similar to Caspase-4 (EC 3.4.22.-) cDNA FLJ32532 fis, clone SMINT2000229, highly similar to CASPASE-4 (EC 3.4.22.-) |
| 4409                     | B3KPZ9           | 2                    | 4              | 9.5                   | 377    | 43209 | 5.9  | CASPASE-4 (EC 3.4.22.-)                                                                                                                   |
| 4409                     | P49662           | 2                    | 4              | 9.5                   | 377    | 43262 | 6    | Caspase-4                                                                                                                                 |
| 4410                     | B7Z860           | 2                    | 2              | 9.2                   | 261    | 28348 | 5    | cDNA FLJ54991                                                                                                                             |
| 4410                     | Q8IWD4           | 2                    | 2              | 8.6                   | 279    | 30541 | 5.1  | Coiled-coil domain-containing protein 117                                                                                                 |
| 4411                     | UPI0001881777    | 2                    | 3              | 16.4                  | 122    | 12508 | 10.5 | UPI0001881777 UniRef100 entry                                                                                                             |
| 4411                     | UPI000198C5FF    | 2                    | 3              | 14.3                  | 140    | 15540 | 10.3 | UPI000198C5FF UniRef100 entry                                                                                                             |
| 4411                     | Q6P582           | 2                    | 3              | 12.7                  | 158    | 16221 | 9.6  | Mitotic-spindle organizing protein 2A                                                                                                     |
| 4411                     | Q6NZ67           | 2                    | 3              | 12.7                  | 158    | 16226 | 10.2 | Mitotic-spindle organizing protein 2B                                                                                                     |
| 4411                     | B8ZZ87           | 2                    | 3              | 9.2                   | 218    | 22281 | 10.2 | Uncharacterized protein                                                                                                                   |
| 4412                     | Q6PID6           | 2                    | 2              | 9.2                   | 262    | 29411 | 5.4  | Tetrapeptide repeat protein 33                                                                                                            |
| 4413                     | B7Z5I6           | 2                    | 2              | 10.2                  | 557    | 61460 | 5.1  | cDNA FLJ56516, highly similar to Nuclear pore complex protein Nup88                                                                       |
| 4413                     | B4DP20           | 2                    | 2              | 9.1                   | 626    | 71285 | 5.9  | cDNA FLJ58372, highly similar to Nuclear pore complex protein Nup88                                                                       |
| 4413                     | Q99567           | 2                    | 2              | 7.7                   | 741    | 83542 | 5.7  | Nuclear pore complex protein Nup88                                                                                                        |
| 4414                     | Q8TBZ6           | 2                    | 2              | 9.1                   | 339    | 39719 | 7.6  | RNA (guanine-9-)-methyltransferase domain-containing protein 2                                                                            |
| 4415                     | O75792           | 2                    | 3              | 9                     | 299    | 33395 | 5.3  | Ribonuclease H2 subunit A                                                                                                                 |
| 4415                     | Q6UQL6           | 2                    | 3              | 9                     | 299    | 33425 | 5.2  | Ribonuclease                                                                                                                              |
| 4415                     | Q6IBG3           | 2                    | 3              | 9                     | 299    | 33353 | 5.3  | Ribonuclease                                                                                                                              |
| 4416                     | P10620           | 2                    | 2              | 9                     | 155    | 17599 | 9.4  | Microsomal glutathione S-transferase 1                                                                                                    |
| 4416                     | Q6LET6           | 2                    | 2              | 9                     | 155    | 17571 | 9.4  | MGST1 protein (Fragment)                                                                                                                  |
| 4417                     | Q06265-3         | 2                    | 4              | 10.7                  | 355    | 39235 | 5.1  | Isoform 3 of Exosome complex exonuclease RRP45                                                                                            |
| 4417                     | Q06265-4         | 2                    | 4              | 10.2                  | 372    | 41089 | 5.1  | Isoform 4 of Exosome complex exonuclease RRP45                                                                                            |
| 4417                     | B4DXG8           | 2                    | 4              | 9.7                   | 392    | 43562 | 4.9  | cDNA FLJ55260, highly similar to Exosome complex exonuclease RRP45 (EC 3.1.13.-)                                                          |
| 4417                     | D6RIY6           | 2                    | 4              | 9                     | 423    | 46978 | 5.2  | Exosome component 9, isoform CRA_f                                                                                                        |
| 4417                     | A5PLM5           | 2                    | 4              | 8.7                   | 439    | 48919 | 5.3  | Exosome component 9                                                                                                                       |
| 4417                     | Q06265           | 2                    | 4              | 8.7                   | 439    | 48949 | 5.3  | Exosome complex exonuclease RRP45                                                                                                         |
| 4417                     | Q06265-2         | 2                    | 4              | 8.3                   | 456    | 50803 | 5.3  | Isoform 2 of Exosome complex exonuclease RRP45                                                                                            |
| 4418                     | D3YRV2           | 2                    | 3              | 29.3                  | 75     | 8493  | 6.3  | p53-induced protein with RING-H2 variant D                                                                                                |
| 4418                     | Q9Y3X7           | 2                    | 3              | 21.4                  | 103    | 12252 | 6.5  | Putative uncharacterized protein DKFZp586C1620 (Fragment)                                                                                 |
| 4418                     | UPI0001D3B499    | 2                    | 3              | 19.8                  | 111    | 12953 | 6.3  | UPI0001D3B499 UniRef100 entry                                                                                                             |
| 4418                     | C7E543           | 2                    | 3              | 12.3                  | 179    | 20735 | 6.6  | p53-induced protein with RING-H2 variant C                                                                                                |
| 4418                     | Q2KN33           | 2                    | 3              | 11.7                  | 188    | 21697 | 6.5  | Ring finger and CHY zinc finger domain containing 1 variant 2                                                                             |
| 4418                     | UPI000048C392    | 2                    | 3              | 11                    | 200    | 23155 | 6.6  | Ring finger and CHY zinc finger domain-containing protein 1 isoform 2                                                                     |
| 4418                     | E7ETW5           | 2                    | 3              | 9.2                   | 239    | 27676 | 6.7  | Uncharacterized protein                                                                                                                   |
| 4418                     | C7E542           | 2                    | 3              | 8.7                   | 252    | 28998 | 6.8  | p53-induced protein with RING-H2 variant B                                                                                                |
| 4418                     | Q96PM5-2         | 2                    | 3              | 8.7                   | 252    | 28983 | 6.9  | Isoform 2 of RING finger and CHY zinc finger domain-containing protein 1                                                                  |
| 4418                     | Q96PM5           | 2                    | 3              | 8.4                   | 261    | 30110 | 6.7  | RING finger and CHY zinc finger domain-containing protein 1                                                                               |
| 4419                     | D6RBR7           | 2                    | 4              | 8.7                   | 229    | 25833 | 8.3  | Uncharacterized protein                                                                                                                   |
| 4419                     | Q9Y3S2           | 2                    | 4              | 6.2                   | 320    | 36201 | 6.2  | Zinc finger protein 330                                                                                                                   |
| 4419                     | Q53ENO           | 2                    | 4              | 6.2                   | 320    | 36227 | 6.1  | Zinc finger protein 330 variant (Fragment)                                                                                                |
| 4420                     | Q7Z528           | 2                    | 7              | 8.6                   | 266    | 30425 | 5.2  | E3-16                                                                                                                                     |
| 4420                     | Q9Y287           | 2                    | 7              | 8.6                   | 266    | 30338 | 5.1  | Integral membrane protein 2B                                                                                                              |
| 4420                     | Q9NX12           | 2                    | 7              | 8.6                   | 266    | 30312 | 5.2  | cDNA FLJ20496 fis, clone KAT08729                                                                                                         |
| 4420                     | Q96B24           | 2                    | 7              | 8.6                   | 266    | 30368 | 5.1  | Integral membrane protein 2B                                                                                                              |
| 4421                     | Q9BYH9           | 2                    | 3              | 60                    | 55     | 6246  | 9.6  | Squamous cell carcinoma antigen 1 (Fragment)                                                                                              |
| 4421                     | Q95740           | 2                    | 3              | 32.4                  | 102    | 11386 | 6.9  | Squamous cell carcinoma antigen 2 (Fragment)                                                                                              |
| 4421                     | C9JZ65           | 2                    | 3              | 15.6                  | 211    | 24374 | 6.6  | Uncharacterized protein                                                                                                                   |
| 4421                     | UPI0000D60EED    | 2                    | 3              | 9.8                   | 338    | 38837 | 6.2  | Serpin B3 (Squamous cell carcinoma antigen 1) (SCCA-1) (Protein T4-A)                                                                     |
| 4421                     | P29508-2         | 2                    | 3              | 9.8                   | 338    | 38550 | 6.7  | Isoform 2 of Serpin B3                                                                                                                    |
| 4421                     | Q9BYF7           | 2                    | 3              | 8.9                   | 369    | 42287 | 6    | SCCA2b                                                                                                                                    |
| 4421                     | A8K847           | 2                    | 3              | 8.5                   | 390    | 44853 | 6.6  | cDNA FLJ75229, highly similar to sapiens serpin peptidase inhibitor, clade B (ovalbumin), member 4 (SERPINB4), mRNA                       |
| 4421                     | Q86W05           | 2                    | 3              | 8.5                   | 390    | 44830 | 6.2  | Squamous cell carcinoma antigen 2                                                                                                         |
| 4421                     | Q5K684           | 2                    | 3              | 8.5                   | 390    | 44770 | 6.6  | SCCA1/SCCA2 fusion protein                                                                                                                |

Table S1. Proteins identified in the OVCAR-3 tumor supernatant by two or more unique peptides.

| Protein or Protein Group | Accession Number | Unique Peptide Count | Spectrum Count | Sequence Coverage (%) | Length | MolWt | pI   | Descriptive Name                                                                                                             |
|--------------------------|------------------|----------------------|----------------|-----------------------|--------|-------|------|------------------------------------------------------------------------------------------------------------------------------|
| 4421                     | Q5K634           | 2                    | 3              | 8.5                   | 390    | 44649 | 6.4  | SCCA2/SCCA1 fusion protein isoform 1                                                                                         |
| 4421                     | Q5K633           | 2                    | 3              | 8.5                   | 390    | 44810 | 6.5  | SCCA2/SCCA1 fusion protein isoform 2                                                                                         |
| 4421                     | P48594           | 2                    | 3              | 8.5                   | 390    | 44854 | 6.2  | Serpin B4                                                                                                                    |
| 4421                     | P29508           | 2                    | 3              | 8.5                   | 390    | 44565 | 6.8  | Serpin B3                                                                                                                    |
| 4421                     | B3W5Y6           | 2                    | 3              | 8.5                   | 390    | 44579 | 6.8  | Squamous cell carcinoma antigen-1 isoform SCCA-PD                                                                            |
| 4422                     | Q86TP1-3         | 2                    | 6              | 12.2                  | 271    | 30127 | 6.2  | Isoform 3 of Protein prune log                                                                                               |
| 4422                     | E7EQ15           | 2                    | 6              | 8.5                   | 386    | 42472 | 5.5  | Uncharacterized protein                                                                                                      |
| 4422                     | Q86TP1-2         | 2                    | 6              | 8.5                   | 386    | 42456 | 5.5  | Isoform 2 of Protein prune log                                                                                               |
| 4422                     | Q86TP1           | 2                    | 6              | 7.3                   | 453    | 50200 | 5.5  | Protein prune log                                                                                                            |
| 4423                     | Q9HBQ7           | 2                    | 2              | 18.5                  | 151    | 16839 | 4.6  | Cathepsin L, isoform CRA_b                                                                                                   |
| 4423                     | A5PLM9           | 2                    | 2              | 8.4                   | 333    | 37533 | 5.4  | Cathepsin L1                                                                                                                 |
| 4423                     | P07711           | 2                    | 2              | 8.4                   | 333    | 37564 | 5.4  | Cathepsin L1                                                                                                                 |
| 4423                     | B3KQK4           | 2                    | 2              | 8.4                   | 333    | 37530 | 5.4  | Cathepsin L (EC 3.4.22.15)                                                                                                   |
| 4424                     | B3KMF7           | 2                    | 4              | 8.4                   | 534    | 61358 | 8.6  | cDNA FLJ10863 fis, clone NT2RP4001575, highly similar to Vacuolar protein sorting protein 52                                 |
| 4424                     | B4DNI9           | 2                    | 4              | 7.5                   | 598    | 68496 | 8.4  | 52                                                                                                                           |
| 4424                     | Q8N1B4           | 2                    | 4              | 6.2                   | 723    | 82221 | 6    | Vacuolar protein sorting-associated protein 52 log                                                                           |
| 4425                     | O14828-2         | 2                    | 6              | 9                     | 321    | 35202 | 7.9  | Isoform 2 of Secretory carrier-associated membrane protein 3                                                                 |
| 4425                     | O14828           | 2                    | 6              | 8.4                   | 347    | 38287 | 7.6  | Secretory carrier-associated membrane protein 3                                                                              |
| 4425                     | Q6FHJ5           | 2                    | 6              | 8.4                   | 347    | 38243 | 7.6  | SCAMP3 protein (Fragment)                                                                                                    |
| 4426                     | Q0VDF9           | 2                    | 3              | 8.4                   | 509    | 54795 | 5.6  | Heat shock 70 kDa protein 14                                                                                                 |
| 4427                     | Q5JTV1           | 2                    | 13             | 8.4                   | 479    | 51234 | 6.3  | Glucocorticoid modulatory element binding protein 2                                                                          |
| 4427                     | Q9UKD1           | 2                    | 13             | 7.5                   | 530    | 56421 | 5.6  | Glucocorticoid modulatory element-binding protein 2                                                                          |
| 4428                     | Q5T750           | 2                    | 2              | 8.4                   | 250    | 26238 | 8    | Skin-specific protein 32                                                                                                     |
| 4429                     | B1APR7           | 2                    | 3              | 8.2                   | 416    | 45549 | 5.8  | Eyes absent log 3 (Drosophila)                                                                                               |
| 4429                     | Q99504-2         | 2                    | 3              | 7.6                   | 447    | 48652 | 5.8  | Isoform 2 of Eyes absent log 3                                                                                               |
| 4429                     | B4DIR7           | 2                    | 3              | 6.5                   | 527    | 57827 | 5.1  | cDNA FLJ50734, highly similar to Eyes absent log 3 (EC 3.1.3.48)                                                             |
| 4429                     | Q81VX7           | 2                    | 3              | 6.3                   | 536    | 58698 | 5    | EYA3 protein                                                                                                                 |
| 4429                     | Q99504           | 2                    | 3              | 5.9                   | 573    | 62663 | 5.2  | Eyes absent log 3                                                                                                            |
| 4430                     | E9PC09           | 2                    | 2              | 12.1                  | 305    | 33564 | 5.9  | Uncharacterized protein                                                                                                      |
| 4430                     | B4DJN0           | 2                    | 2              | 8.2                   | 451    | 50289 | 5.6  | cDNA FLJ51641, highly similar to Nicastrin                                                                                   |
| 4430                     | Q92542-2         | 2                    | 2              | 5.4                   | 689    | 76744 | 5.7  | Isoform 2 of Nicastrin                                                                                                       |
| 4430                     | Q92542           | 2                    | 2              | 5.2                   | 709    | 78411 | 6    | Nicastrin                                                                                                                    |
| 4431                     | P02647           | 2                    | 2              | 8.2                   | 267    | 30778 | 5.8  | Apolipoprotein A-I                                                                                                           |
| 4432                     | Q96TC7-2         | 2                    | 17             | 9.7                   | 341    | 38247 | 4.7  | Isoform 2 of Regulator of microtubule dynamics protein 3                                                                     |
| 4432                     | B3KUI4           | 2                    | 17             | 8.1                   | 407    | 45338 | 4.8  | cDNA FLJ39967 fis, clone SPLEN2027488, highly similar to sapiens family with sequence similarity 82, member C (FAM82C), mRNA |
| 4432                     | Q96TC7           | 2                    | 17             | 7                     | 470    | 52118 | 5.1  | Regulator of microtubule dynamics protein 3                                                                                  |
| 4433                     | Q99557           | 2                    | 4              | 32.6                  | 86     | 9780  | 10.1 | NF-IL6 (Fragment)                                                                                                            |
| 4433                     | Q9BSC0           | 2                    | 4              | 20.4                  | 137    | 14860 | 9.8  | CEBPB protein (Fragment)                                                                                                     |
| 4433                     | P17676           | 2                    | 4              | 8.1                   | 345    | 36106 | 8.3  | CCAAT/enhancer-binding protein beta                                                                                          |
| 4434                     | Q5HYI8           | 2                    | 3              | 8.1                   | 236    | 26423 | 7.1  | Rab-like protein 3                                                                                                           |
| 4435                     | Q6DD87           | 2                    | 7              | 8.1                   | 382    | 40428 | 8    | Zinc finger protein 787                                                                                                      |
| 4436                     | B2RDT9           | 2                    | 4              | 8                     | 348    | 39384 | 5.1  | cDNA, FLJ96765                                                                                                               |
| 4437                     | B3KSE0           | 2                    | 2              | 7.9                   | 316    | 35961 | 5.5  | cDNA FLJ36069 fis, clone TESTI2019406, highly similar to HEME OXYGENASE 2 (EC 1.14.99.3)                                     |
| 4437                     | Q6IBP2           | 2                    | 2              | 7.9                   | 316    | 36015 | 5.4  | HMOX2 protein                                                                                                                |
| 4437                     | Q6FHB5           | 2                    | 2              | 7.9                   | 316    | 36049 | 5.4  | HMOX2 protein (Fragment)                                                                                                     |
| 4437                     | Q53HF1           | 2                    | 2              | 7.9                   | 316    | 35934 | 5.4  | Heme oxygenase (Decyclizing) 2 variant (Fragment)                                                                            |
| 4437                     | P30519           | 2                    | 2              | 7.9                   | 316    | 36033 | 5.4  | Heme oxygenase 2                                                                                                             |
| 4438                     | Q8NBN7           | 2                    | 3              | 7.9                   | 331    | 35932 | 8.1  | Retinol dehydrogenase 13                                                                                                     |
| 4439                     | Q94768           | 2                    | 2              | 7.8                   | 372    | 42344 | 5.3  | Serine/threonine-protein kinase 17B                                                                                          |
| 4439                     | Q6FG98           | 2                    | 2              | 7.8                   | 372    | 42245 | 5.2  | STK17B protein                                                                                                               |
| 4439                     | Q6FG83           | 2                    | 2              | 7.8                   | 372    | 42291 | 5.2  | STK17B protein (Fragment)                                                                                                    |
| 4440                     | Q9NUJ1           | 2                    | 3              | 7.8                   | 306    | 33933 | 8.6  | Abhydrolase domain-containing protein 10, mitochondrial                                                                      |
| 4441                     | B4DMK2           | 2                    | 2              | 7.7                   | 312    | 35541 | 7.3  | cDNA FLJ57398                                                                                                                |
| 4441                     | E7EMP6           | 2                    | 2              | 7.7                   | 312    | 35571 | 7.3  | Uncharacterized protein                                                                                                      |
| 4441                     | Q96FZ2           | 2                    | 2              | 6.8                   | 354    | 40575 | 8.1  | UPF0361 protein C3orf37                                                                                                      |
| 4442                     | E7EW99           | 2                    | 3              | 18.9                  | 201    | 23119 | 8.8  | Uncharacterized protein                                                                                                      |
| 4442                     | B7Z7K8           | 2                    | 3              | 7.7                   | 493    | 55931 | 6.6  | cDNA FLJ51143, highly similar to Melanoma antigen preferentially expressed in tumors                                         |
| 4442                     | B7ZAT0           | 2                    | 3              | 7.7                   | 493    | 55883 | 6.6  | cDNA, FLJ79294, highly similar to Melanoma antigen preferentially expressed in tumors                                        |
| 4442                     | P78395           | 2                    | 3              | 7.5                   | 509    | 57890 | 6.9  | Melanoma antigen preferentially expressed in tumors                                                                          |
| 4443                     | C9JFK9           | 2                    | 3              | 7.7                   | 325    | 34760 | 9.4  | Uncharacterized protein                                                                                                      |
| 4443                     | Q53GY1           | 2                    | 3              | 4.3                   | 575    | 61604 | 7.4  | BCL2-associated athanogene 3 variant (Fragment)                                                                              |
| 4443                     | Q95817           | 2                    | 3              | 4.3                   | 575    | 61595 | 7    | BAG family molecular chaperone regulator 3                                                                                   |
| 4444                     | D3VVR8           | 2                    | 2              | 10.1                  | 218    | 25349 | 4.8  | Ataxin 3 variant r (Fragment)                                                                                                |
| 4444                     | D3VVN3           | 2                    | 2              | 9.2                   | 238    | 27335 | 4.8  | Ataxin 3 variant at (Fragment)                                                                                               |
| 4444                     | D3VVD9           | 2                    | 2              | 8.3                   | 265    | 30726 | 5.2  | Ataxin 3 variant y (Fragment)                                                                                                |
| 4444                     | D3VVB2           | 2                    | 2              | 7.7                   | 287    | 33279 | 5    | Ataxin 3 variant h (Fragment)                                                                                                |
| 4444                     | D3VVR4           | 2                    | 2              | 7.6                   | 289    | 33245 | 4.7  | Ataxin 3 variant e (Fragment)                                                                                                |
| 4444                     | D3VVE3           | 2                    | 2              | 7.6                   | 290    | 33693 | 5    | Ataxin 3 variant h (Fragment)                                                                                                |
| 4444                     | D3VVJ1           | 2                    | 2              | 6.7                   | 328    | 37943 | 4.9  | Ataxin 3 variant ref (Fragment)                                                                                              |
| 4444                     | D3VVJ2           | 2                    | 2              | 6.6                   | 335    | 38512 | 4.7  | Ataxin 3 variant ref (Fragment)                                                                                              |
| 4444                     | D3VVI8           | 2                    | 2              | 6.6                   | 334    | 38488 | 4.8  | Ataxin 3 variant ref (Fragment)                                                                                              |
| 4444                     | D3VVG7           | 2                    | 2              | 6.6                   | 335    | 38656 | 4.9  | Ataxin 3 variant ref (Fragment)                                                                                              |
| 4444                     | D3VVT6           | 2                    | 2              | 6.5                   | 336    | 38785 | 4.9  | Ataxin 3 variant ref (Fragment)                                                                                              |
| 4444                     | D3VVJ3           | 2                    | 2              | 6.5                   | 341    | 39497 | 4.8  | Ataxin 3 variant ref (Fragment)                                                                                              |
| 4444                     | D3VVD7           | 2                    | 2              | 6.5                   | 336    | 38812 | 4.9  | Ataxin 3 variant ref (Fragment)                                                                                              |
| 4444                     | D3VVB3           | 2                    | 2              | 6.5                   | 341    | 39443 | 4.9  | Ataxin 3 variant ref (Fragment)                                                                                              |
| 4444                     | D3VVN1           | 2                    | 2              | 6.4                   | 343    | 39681 | 4.9  | Ataxin 3 variant ref (Fragment)                                                                                              |
| 4444                     | D3VVN0           | 2                    | 2              | 6.4                   | 344    | 39795 | 4.9  | Ataxin 3 variant ref (Fragment)                                                                                              |
| 4444                     | D3VVS1           | 2                    | 2              | 5.7                   | 387    | 44960 | 4.7  | Ataxin 3 variant ref (Fragment)                                                                                              |
| 4444                     | D3VVR6           | 2                    | 2              | 5.7                   | 383    | 44649 | 4.9  | Ataxin 3 variant ref (Fragment)                                                                                              |
| 4444                     | D3VVK7           | 2                    | 2              | 5.6                   | 395    | 46347 | 4.9  | Ataxin 3 variant ref (Fragment)                                                                                              |
| 4445                     | B7Z4S8           | 2                    | 4              | 8                     | 410    | 47072 | 6.7  | cDNA FLJ53066, highly similar to Legumain (EC 3.4.22.34)                                                                     |
| 4445                     | A8K669           | 2                    | 4              | 7.6                   | 433    | 49401 | 6.6  | cDNA FLJ78452, highly similar to sapiens legumain (LGMN), transcript variant 2, mRNA                                         |
| 4445                     | Q99538           | 2                    | 4              | 7.6                   | 433    | 49411 | 6.6  | Legumain                                                                                                                     |
| 4445                     | Q6IUJ9           | 2                    | 4              | 7.6                   | 433    | 49353 | 6.6  | LGMN protein                                                                                                                 |
| 4446                     | B4DLP1           | 2                    | 3              | 7.6                   | 355    | 38798 | 5.3  | cDNA FLJ52560                                                                                                                |
| 4447                     | Q96IZ0           | 2                    | 2              | 7.6                   | 340    | 36568 | 5.4  | PRKC apoptosis WT1 regulator protein                                                                                         |
| 4448                     | B2RAZ3           | 2                    | 2              | 7.3                   | 427    | 47253 | 5.3  | cDNA, FLJ95207, highly similar to sapiens interferon regulatory factor 3 (IRF3), mRNA                                        |
| 4448                     | Q14653           | 2                    | 2              | 7.3                   | 427    | 47219 | 5.3  | Interferon regulatory factor 3                                                                                               |
| 4448                     | Q96GL3           | 2                    | 2              | 6.9                   | 452    | 49120 | 6.5  | IRF3 protein                                                                                                                 |
| 4448                     | Q7Z5G6           | 2                    | 2              | 6.9                   | 452    | 49135 | 6.5  | IRF3 protein                                                                                                                 |
| 4449                     | Q6IPN0           | 2                    | 3              | 7.3                   | 343    | 36918 | 4.8  | RTN4 protein                                                                                                                 |
| 4449                     | Q7L7Q6           | 2                    | 3              | 6.7                   | 373    | 40318 | 4.8  | RTN4                                                                                                                         |

Table S1. Proteins identified in the OVCAR-3 tumor supernatant by two or more unique peptides.

| Protein or Protein Group | Accession Number | Unique Peptide Count | Spectrum Count | Sequence Coverage (%) | Length | MolWt  | pI   | Descriptive Name                                                                                                                                                  |
|--------------------------|------------------|----------------------|----------------|-----------------------|--------|--------|------|-------------------------------------------------------------------------------------------------------------------------------------------------------------------|
| 4449                     | Q9NOC3-5         | 2                    | 3              | 6.4                   | 392    | 42274  | 4.7  | Isoform 5 of Reticulon-4                                                                                                                                          |
| 4449                     | Q9NOC3           | 2                    | 3              | 2.1                   | 1192   | 129931 | 4.5  | Reticulon-4                                                                                                                                                       |
| 4450                     | Q6PD74           | 2                    | 4              | 7.3                   | 315    | 34594  | 4.6  | Alpha- and gamma-adaptin-binding protein p34                                                                                                                      |
| 4451                     | E7EX40           | 2                    | 8              | 7.2                   | 501    | 54833  | 9    | Uncharacterized protein                                                                                                                                           |
| 4451                     | Q4JIW2           | 2                    | 8              | 7.2                   | 501    | 54803  | 9    | Rab11-family interacting protein 1D                                                                                                                               |
| 4451                     | Q6WKZ4-1         | 2                    | 8              | 5.9                   | 612    | 65217  | 4.8  | Isoform 3 of Rab11 family-interacting protein 1                                                                                                                   |
| 4451                     | Q6WKZ4-3         | 2                    | 8              | 5.5                   | 649    | 70983  | 9.3  | Isoform 2 of Rab11 family-interacting protein 1                                                                                                                   |
| 4451                     | Q307T1           | 2                    | 8              | 5.5                   | 649    | 70953  | 9.3  | RAB11-family interacting protein 1C                                                                                                                               |
| 4451                     | UPI0000D624B1    | 2                    | 8              | 2.8                   | 1283   | 137167 | 5.4  | rab11 family-interacting protein 1 isoform 3                                                                                                                      |
| 4451                     | Q6WKZ4           | 2                    | 8              | 2.8                   | 1283   | 137195 | 5.5  | Rab11 family-interacting protein 1                                                                                                                                |
| 4452                     | Q9H8M7           | 2                    | 2              | 7.2                   | 445    | 49725  | 4.8  | Protein FAM188A                                                                                                                                                   |
| 4453                     | Q86WB0-3         | 2                    | 7              | 7.9                   | 431    | 47771  | 5.2  | Isoform 3 of Nuclear-interacting partner of ALK                                                                                                                   |
| 4453                     | C9J0I9           | 2                    | 7              | 7.4                   | 459    | 50562  | 5.8  | Uncharacterized protein                                                                                                                                           |
| 4453                     | A4D1L4           | 2                    | 7              | 7.1                   | 481    | 53603  | 6.2  | Nuclear interacting partner of anaplastic lymphoma kinase (ALK)                                                                                                   |
| 4453                     | Q86WB0-2         | 2                    | 7              | 7.1                   | 481    | 53559  | 6.4  | Isoform 2 of Nuclear-interacting partner of ALK                                                                                                                   |
| 4453                     | Q86WB0           | 2                    | 7              | 6.8                   | 502    | 55262  | 5.6  | Nuclear-interacting partner of ALK                                                                                                                                |
| 4454                     | Q7L8W6           | 2                    | 3              | 7.1                   | 267    | 30307  | 5.4  | ATP-binding domain-containing protein 4                                                                                                                           |
| 4455                     | Q68DQ7           | 2                    | 3              | 7.3                   | 385    | 42838  | 5.2  | Branched-chain-amino-acid aminotransferase                                                                                                                        |
| 4455                     | P54687           | 2                    | 3              | 7.3                   | 386    | 42966  | 5.3  | Branched-chain-amino-acid aminotransferase, cytosolic                                                                                                             |
| 4455                     | B7Z2M5           | 2                    | 3              | 7                     | 398    | 44100  | 5.4  | Branched-chain-amino-acid aminotransferase                                                                                                                        |
| 4455                     | UPI0001D27F89    | 2                    | 3              | 7                     | 398    | 44132  | 5.4  | branched-chain-amino-acid aminotransferase, cytosolic isoform 4                                                                                                   |
| 4456                     | P51531-2         | 2                    | 4              | 7.1                   | 1572   | 179280 | 7.3  | Isoform Short of Probable global transcription activator SNF2L2                                                                                                   |
| 4456                     | P51531           | 2                    | 4              | 7                     | 1590   | 181278 | 7.2  | Probable global transcription activator SNF2L2                                                                                                                    |
| 4457                     | Q13371           | 2                    | 4              | 7                     | 301    | 34282  | 4.7  | Phosducin-like protein                                                                                                                                            |
| 4458                     | Q86T04           | 2                    | 2              | 7                     | 383    | 42555  | 6.1  | Full-length cDNA clone CS0DJ014YO21 of T cells (Jurkat cell line) of sapiens (human) (Fragment)                                                                   |
| 4458                     | Q8NOZ6           | 2                    | 2              | 6.1                   | 440    | 48928  | 6.5  | Tetratricopeptide repeat protein 5                                                                                                                                |
| 4459                     | Q9BRX9           | 2                    | 2              | 7                     | 315    | 34343  | 5.6  | WD repeat domain-containing protein 83                                                                                                                            |
| 4460                     | B7Z1Q8           | 2                    | 2              | 8.7                   | 527    | 59344  | 5.6  | cDNA FLJ59617, highly similar to DCC-interacting protein 13 beta                                                                                                  |
| 4460                     | B7Z411           | 2                    | 2              | 7.4                   | 621    | 69730  | 5.1  | cDNA FLJ54016, highly similar to DCC-interacting protein 13 beta cDNA FLJ76257, highly similar to sapiens DIP13 beta (DIP13B), mRNA                               |
| 4460                     | A8K3E7           | 2                    | 2              | 6.9                   | 664    | 74466  | 4.9  | DCC-interacting protein 13-beta                                                                                                                                   |
| 4460                     | Q8NEU8           | 2                    | 2              | 6.9                   | 664    | 74493  | 4.9  | DCC-interacting protein 13-beta                                                                                                                                   |
| 4461                     | Q659C5           | 2                    | 2              | 7.1                   | 423    | 47494  | 6.1  | Putative uncharacterized protein DKFZp434E1212 (Fragment)                                                                                                         |
| 4461                     | E9PD44           | 2                    | 2              | 6.9                   | 434    | 48673  | 6.3  | Uncharacterized protein                                                                                                                                           |
| 4461                     | Q9HBU6           | 2                    | 2              | 6.6                   | 452    | 50968  | 6.5  | Ethanolamine kinase 1                                                                                                                                             |
| 4462                     | Q95551           | 2                    | 2              | 6.9                   | 362    | 40930  | 5.1  | Tyrosyl-DNA phosphodiesterase 2                                                                                                                                   |
| 4463                     | Q9H6D7           | 2                    | 2              | 6.9                   | 363    | 42400  | 5.7  | HAUS augmin-like complex subunit 4                                                                                                                                |
| 4464                     | Q16831           | 2                    | 2              | 6.8                   | 310    | 33934  | 7.9  | Uridine phosphorylase 1                                                                                                                                           |
| 4465                     | P29466-2         | 2                    | 2              | 7                     | 383    | 42888  | 6.2  | Isoform Beta of Caspase-1                                                                                                                                         |
| 4465                     | A8K257           | 2                    | 2              | 7                     | 383    | 42860  | 6.2  | cDNA FLJ75298, highly similar to sapiens caspase 1, apoptosis-related cysteine protease(interleukin 1, beta, convertase) (CASP1), transcript variant beta, mRNA   |
| 4465                     | A8K249           | 2                    | 2              | 6.7                   | 404    | 45099  | 5.9  | cDNA FLJ77899, highly similar to sapiens caspase 1, apoptosis-related cysteine protease(interleukin 1, beta, convertase) (CASP1), transcript variant alpha, mRNA  |
| 4465                     | P29466           | 2                    | 2              | 6.7                   | 404    | 45159  | 5.9  | Caspase-1                                                                                                                                                         |
| 4465                     | B2R8U9           | 2                    | 2              | 6.7                   | 404    | 45171  | 5.9  | cDNA, FLJ94074, highly similar to sapiens caspase 1, apoptosis-related cysteine protease(interleukin 1, beta, convertase) (CASP1), transcript variant alpha, mRNA |
| 4466                     | O75909           | 2                    | 4              | 6.9                   | 580    | 64240  | 8.4  | Cyclin-K                                                                                                                                                          |
| 4466                     | C9J1I3           | 2                    | 4              | 6.7                   | 600    | 66110  | 8.6  | Uncharacterized protein                                                                                                                                           |
| 4466                     | O75909-4         | 2                    | 4              | 6.7                   | 600    | 66137  | 8.6  | Isoform 4 of Cyclin-K                                                                                                                                             |
| 4467                     | P20248           | 2                    | 3              | 6.7                   | 432    | 48551  | 6.5  | Cyclin-A2                                                                                                                                                         |
| 4468                     | Q08431-2         | 2                    | 2              | 8                     | 312    | 35189  | 8.9  | Isoform 2 of Lactadherin                                                                                                                                          |
| 4468                     | UPI000013D7A2    | 2                    | 2              | 7.5                   | 335    | 37505  | 8.2  | lactadherin isoform b                                                                                                                                             |
| 4468                     | Q08431-3         | 2                    | 2              | 7.5                   | 335    | 37523  | 8.2  | Isoform 3 of Lactadherin                                                                                                                                          |
| 4468                     | B3KTO2           | 2                    | 2              | 6.6                   | 379    | 42460  | 7.8  | cDNA FLJ38589 fis, clone HCHON2010074, highly similar to LACTADHERIN                                                                                              |
| 4468                     | Q08431           | 2                    | 2              | 6.5                   | 387    | 43123  | 8.1  | Lactadherin                                                                                                                                                       |
| 4469                     | B3KTS4           | 2                    | 2              | 6.6                   | 709    | 80184  | 7.5  | cDNA FLJ38665 fis, clone HLUNG2003378, highly similar to Rho guanine nucleotide exchange factor 16                                                                |
| 4469                     | Q5VV41           | 2                    | 2              | 6.6                   | 709    | 80105  | 7.4  | Rho guanine nucleotide exchange factor 16                                                                                                                         |
| 4470                     | B7Z8M9           | 2                    | 3              | 7.4                   | 363    | 41127  | 8    | cDNA FLJ58824, highly similar to Periphilin-1                                                                                                                     |
| 4470                     | B7Z695           | 2                    | 3              | 6.6                   | 409    | 46732  | 8.5  | cDNA FLJ52742, highly similar to Periphilin-1                                                                                                                     |
| 4470                     | Q8NEY8-3         | 2                    | 3              | 6.2                   | 434    | 49624  | 8.7  | Isoform 3 of Periphilin-1                                                                                                                                         |
| 4470                     | E9PEG4           | 2                    | 3              | 6.2                   | 434    | 49655  | 8.7  | Uncharacterized protein                                                                                                                                           |
| 4470                     | Q8NEY8           | 2                    | 3              | 5.9                   | 458    | 52737  | 9.1  | Periphilin-1                                                                                                                                                      |
| 4471                     | Q2TAM5           | 2                    | 2              | 7.2                   | 377    | 42868  | 8.4  | RELA protein                                                                                                                                                      |
| 4471                     | E9PKH5           | 2                    | 2              | 6.5                   | 418    | 46697  | 8.4  | Uncharacterized protein                                                                                                                                           |
| 4471                     | Q04206-3         | 2                    | 2              | 5                     | 541    | 59068  | 6    | Isoform 3 of Transcription factor p65                                                                                                                             |
| 4471                     | Q04206-2         | 2                    | 2              | 5                     | 537    | 58807  | 5.9  | Isoform 2 of Transcription factor p65                                                                                                                             |
| 4471                     | Q04206-4         | 2                    | 2              | 4.9                   | 548    | 59910  | 5.7  | Isoform 4 of Transcription factor p65                                                                                                                             |
| 4471                     | Q04206           | 2                    | 2              | 4.9                   | 551    | 60219  | 5.7  | Transcription factor p65                                                                                                                                          |
| 4472                     | A0PJ61           | 2                    | 2              | 6.4                   | 440    | 49490  | 10.1 | RSL1D1 protein (Fragment)                                                                                                                                         |
| 4472                     | Q32O62           | 2                    | 2              | 6                     | 464    | 52165  | 10.2 | RSL1D1 protein (Fragment)                                                                                                                                         |
| 4472                     | O76021           | 2                    | 2              | 5.7                   | 490    | 54973  | 10.1 | Ribosomal L1 domain-containing protein 1                                                                                                                          |
| 4472                     | E9PE52           | 2                    | 2              | 5.7                   | 489    | 54844  | 10.1 | Uncharacterized protein                                                                                                                                           |
| 4473                     | Q9NSC1           | 2                    | 3              | 7.1                   | 325    | 36023  | 5.5  | Homer-3B protein                                                                                                                                                  |
| 4473                     | E9PCW9           | 2                    | 3              | 7.1                   | 325    | 35954  | 5.4  | Uncharacterized protein                                                                                                                                           |
| 4473                     | B2RA10           | 2                    | 3              | 6.4                   | 361    | 39905  | 5.6  | Homer log 3 (Drosophila), isoform CRA_b                                                                                                                           |
| 4473                     | Q9NSC5-2         | 2                    | 3              | 6.4                   | 358    | 39479  | 5.7  | Isoform 2 of Homer protein log 3                                                                                                                                  |
| 4473                     | Q9NSC5           | 2                    | 3              | 6.4                   | 361    | 39836  | 5.4  | Homer protein log 3                                                                                                                                               |
| 4473                     | Q5U0L9           | 2                    | 3              | 6.4                   | 361    | 39963  | 5.5  | Homer log 3 (Drosophila)                                                                                                                                          |
| 4474                     | Q5TZV8           | 2                    | 2              | 7.2                   | 442    | 48075  | 7    | Interferon-related developmental regulator 2                                                                                                                      |
| 4474                     | Q12894           | 2                    | 2              | 6.3                   | 506    | 54814  | 7.9  | Interferon-related developmental regulator 2                                                                                                                      |
| 4474                     | Q9UJ88           | 2                    | 2              | 5.3                   | 608    | 65598  | 8.6  | Interferon-related IFRD2 (PC4-B) protein                                                                                                                          |
| 4475                     | Q9HB40-2         | 2                    | 6              | 8.4                   | 296    | 32957  | 5    | Isoform 2 of Retinoid-inducible serine carboxypeptidase cDNA FLJ55993, highly similar to Retinoid-inducible serine carboxypeptidase (EC 3.4.16.-)                 |
| 4475                     | B4DP22           | 2                    | 6              | 6.2                   | 402    | 45132  | 6    | carboxypeptidase (EC 3.4.16.-)                                                                                                                                    |
| 4475                     | Q9HB40           | 2                    | 6              | 5.5                   | 452    | 50831  | 5.8  | Retinoid-inducible serine carboxypeptidase                                                                                                                        |
| 4476                     | E9PNJ4           | 2                    | 2              | 6.2                   | 512    | 57620  | 8.3  | Uncharacterized protein                                                                                                                                           |
| 4476                     | Q13586           | 2                    | 2              | 4.7                   | 685    | 77423  | 6.7  | Stromal interaction molecule 1                                                                                                                                    |
| 4477                     | E7EV76           | 2                    | 2              | 7.4                   | 461    | 51132  | 6.4  | Uncharacterized protein                                                                                                                                           |
| 4477                     | B4DN79           | 2                    | 2              | 7.4                   | 461    | 51142  | 6.4  | cDNA FLJ53367, highly similar to Transmembrane glycoprotein NMB                                                                                                   |
| 4477                     | B2R5R1           | 2                    | 2              | 6.1                   | 560    | 62613  | 6.6  | cDNA, FLJ92578, highly similar to sapiens glycoprotein (transmembrane) nmb (GPNMB), mRNA                                                                          |
| 4477                     | Q14956-2         | 2                    | 2              | 6.1                   | 560    | 62643  | 6.6  | Isoform 2 of Transmembrane glycoprotein NMB                                                                                                                       |
| 4477                     | Q14956           | 2                    | 2              | 5.9                   | 572    | 63923  | 6.6  | Transmembrane glycoprotein NMB                                                                                                                                    |



Table S1. Proteins identified in the OVCAR-3 tumor supernatant by two or more unique peptides.

| Protein or Protein Group | Accession Number | Unique Peptide Count | Spectrum Count | Sequence Coverage (%) | Length | MolWt  | pI   | Descriptive Name                                                                                             |
|--------------------------|------------------|----------------------|----------------|-----------------------|--------|--------|------|--------------------------------------------------------------------------------------------------------------|
| 4502                     | Q9GZR7           | 2                    | 3              | 2.9                   | 859    | 96332  | 9.1  | ATP-dependent RNA helicase DDX24                                                                             |
| 4503                     | E9PGJ9           | 2                    | 2              | 5.1                   | 573    | 63843  | 9.9  | Uncharacterized protein                                                                                      |
| 4503                     | Q9NX28           | 2                    | 2              | 5.1                   | 572    | 63701  | 9.9  | cDNA FLJ20475 fis, clone KAT07206                                                                            |
| 4503                     | Q6P1N0-2         | 2                    | 2              | 3.1                   | 950    | 103934 | 8.1  | Isoform 2 of Coiled-coil and C2 domain-containing protein 1A                                                 |
| 4503                     | Q6P1N0           | 2                    | 2              | 3                     | 951    | 104062 | 8.1  | Coiled-coil and C2 domain-containing protein 1A                                                              |
| 4504                     | P41214-2         | 2                    | 2              | 6.5                   | 460    | 51013  | 8.9  | Isoform 2 of Eukaryotic translation initiation factor 2D                                                     |
| 4504                     | P41214           | 2                    | 2              | 5.1                   | 584    | 64707  | 7.6  | Eukaryotic translation initiation factor 2D                                                                  |
| 4505                     | UPI000056D41D    | 2                    | 4              | 6.6                   | 472    | 52175  | 7.8  | UPI000056D41D UniRef100 entry                                                                                |
| 4505                     | Q6L8Q7-2         | 2                    | 4              | 5.8                   | 535    | 58890  | 6.9  | Isoform 2 of 2',5'-phosphodiesterase 12                                                                      |
| 4505                     | Q6L8Q7           | 2                    | 4              | 5.1                   | 609    | 67352  | 6.6  | 2',5'-phosphodiesterase 12                                                                                   |
| 4506                     | Q9BV38           | 2                    | 2              | 5.1                   | 432    | 47405  | 6.7  | WD repeat-containing protein 18                                                                              |
| 4507                     | B3KSN1           | 2                    | 3              | 5                     | 614    | 68900  | 5.8  | cDNA FLJ36670 fis, clone UTERU2004037, highly similar to Conserved oligomeric Golgi complex component 7      |
| 4507                     | P83436           | 2                    | 3              | 4                     | 770    | 86344  | 5.5  | Conserved oligomeric Golgi complex subunit 7                                                                 |
| 4508                     | B4E074           | 2                    | 2              | 5                     | 461    | 50729  | 7    | cDNA FLJ58655, highly similar to Notchless log 1                                                             |
| 4508                     | E9PEC6           | 2                    | 2              | 5                     | 462    | 50772  | 7    | Uncharacterized protein                                                                                      |
| 4508                     | Q9NVX2           | 2                    | 2              | 4.7                   | 485    | 53320  | 7.3  | Notchless protein log 1                                                                                      |
| 4509                     | Q5T8J2           | 2                    | 2              | 7.7                   | 286    | 32908  | 8.9  | Bystin-like                                                                                                  |
| 4509                     | Q13895           | 2                    | 2              | 5                     | 437    | 49601  | 8.1  | Bystin                                                                                                       |
| 4510                     | Q96JB2           | 2                    | 2              | 5                     | 828    | 94096  | 5.6  | Conserved oligomeric Golgi complex subunit 3                                                                 |
| 4511                     | Q9NVR5           | 2                    | 3              | 5                     | 837    | 91114  | 5.2  | Protein kintoun                                                                                              |
| 4512                     | E9PF19           | 2                    | 5              | 5.4                   | 411    | 45935  | 9.5  | Uncharacterized protein                                                                                      |
| 4512                     | B4DY50           | 2                    | 5              | 5.4                   | 411    | 45949  | 9.5  | cDNA FLJ55528, highly similar to Transducin beta-like 2 protein                                              |
| 4512                     | B2RB52           | 2                    | 5              | 4.9                   | 447    | 49828  | 9.4  | cDNA, FLJ95314, highly similar to sapiens transducin (beta)-like 2 (TBL2), transcript variant 1, mRNA        |
| 4512                     | Q9Y4P3           | 2                    | 5              | 4.9                   | 447    | 49798  | 9.4  | Transducin beta-like protein 2                                                                               |
| 4512                     | Q96E41           | 2                    | 5              | 4.9                   | 446    | 49525  | 9.2  | TBL2 protein                                                                                                 |
| 4512                     | Q8N2L6           | 2                    | 5              | 4.9                   | 447    | 49824  | 9.4  | cDNA FLJ90138 fis, clone HEMBB1000905, weakly similar to TRANSCRIPTIONAL REPRESSOR RCO-1                     |
| 4513                     | B4E014           | 2                    | 4              | 4.9                   | 649    | 75032  | 7.7  | cDNA FLJ54334, highly similar to Origin recognition complex subunit 3                                        |
| 4513                     | E7ENV6           | 2                    | 4              | 4.9                   | 649    | 75036  | 7.6  | Uncharacterized protein                                                                                      |
| 4513                     | Q9UBD5-2         | 2                    | 4              | 4.5                   | 712    | 82325  | 7.6  | Isoform 2 of Origin recognition complex subunit 3                                                            |
| 4513                     | Q9UBD5           | 2                    | 4              | 4.5                   | 711    | 82254  | 7.6  | Origin recognition complex subunit 3                                                                         |
| 4514                     | B4E2Z3           | 2                    | 4              | 4.9                   | 511    | 55940  | 5.2  | cDNA FLJ54090, highly similar to 4F2 cell-surface antigen heavy chain                                        |
| 4514                     | P08195-3         | 2                    | 4              | 4.4                   | 568    | 61816  | 5.2  | Isoform 3 of 4F2 cell-surface antigen heavy chain                                                            |
| 4514                     | UPI00004EC298    | 2                    | 4              | 4                     | 631    | 68101  | 5    | 4F2 cell-surface antigen heavy chain isoform b                                                               |
| 4514                     | P08195           | 2                    | 4              | 4                     | 630    | 67994  | 5    | 4F2 cell-surface antigen heavy chain                                                                         |
| 4514                     | P08195-4         | 2                    | 4              | 3.8                   | 661    | 71123  | 5    | Isoform 4 of 4F2 cell-surface antigen heavy chain                                                            |
| 4515                     | Q15050           | 2                    | 2              | 4.9                   | 365    | 41193  | 10.7 | Ribosome biogenesis regulatory protein log                                                                   |
| 4516                     | Q68BL7           | 2                    | 5              | 4.9                   | 652    | 73054  | 7.8  | Olfactomedin-like protein 2A                                                                                 |
| 4517                     | UPI000198C8F9    | 2                    | 2              | 9.3                   | 269    | 30349  | 6.7  | UPI000198C8F9 UniRef100 entry                                                                                |
| 4517                     | Q9BV44           | 2                    | 2              | 4.9                   | 507    | 57003  | 6.4  | THUMP domain-containing protein 3                                                                            |
| 4518                     | A1B0X2           | 2                    | 2              | 4.8                   | 442    | 51121  | 7.6  | Tricellulin isoform c                                                                                        |
| 4518                     | Q8N4S9-3         | 2                    | 2              | 3.8                   | 546    | 62797  | 7.2  | Isoform 3 of MARVEL domain-containing protein 2                                                              |
| 4518                     | Q8N4S9           | 2                    | 2              | 3.8                   | 558    | 64168  | 7.5  | MARVEL domain-containing protein 2                                                                           |
| 4519                     | Q9BTE6           | 2                    | 3              | 6.8                   | 412    | 45480  | 6.4  | Alanyl-tRNA editing protein Aarsd1                                                                           |
| 4519                     | C9J5N1           | 2                    | 3              | 5.7                   | 495    | 55066  | 6.5  | Uncharacterized protein                                                                                      |
| 4519                     | B4DI73           | 2                    | 3              | 4.8                   | 586    | 65702  | 6.5  | Alanyl-tRNA synthetase domain containing 1, isoform CRA_a                                                    |
| 4520                     | E9PKG6           | 2                    | 3              | 5.9                   | 338    | 40342  | 5.2  | Uncharacterized protein                                                                                      |
| 4520                     | D3DQX5           | 2                    | 3              | 4.8                   | 420    | 50223  | 5.1  | Nucleobindin 2, isoform CRA_a                                                                                |
| 4520                     | P80303-2         | 2                    | 3              | 4.8                   | 420    | 50201  | 5.1  | Isoform 2 of Nucleobindin-2                                                                                  |
| 4520                     | P80303           | 2                    | 3              | 4.8                   | 420    | 50196  | 5.1  | Nucleobindin-2                                                                                               |
| 4521                     | B7Z4B1           | 2                    | 3              | 5.3                   | 490    | 58839  | 9.2  | cDNA FLJ50801, highly similar to Coiled-coil domain-containing protein 55                                    |
| 4521                     | B7ZL27           | 2                    | 3              | 4.9                   | 534    | 63685  | 8.9  | CCDC55 protein (Fragment)                                                                                    |
| 4521                     | B2R9Y2           | 2                    | 3              | 4.7                   | 558    | 66389  | 9    | cDNA, FLJ94609                                                                                               |
| 4521                     | Q9H0G5           | 2                    | 3              | 4.7                   | 558    | 66390  | 8.8  | Coiled-coil domain-containing protein 55                                                                     |
| 4522                     | B8ZZG1           | 2                    | 2              | 4.7                   | 428    | 48758  | 8.8  | Membrane protein, palmitoylated 6 (MAGUK p55 subfamily member 6), isoform CRA_a                              |
| 4522                     | Q9NZW5           | 2                    | 2              | 3.7                   | 540    | 61117  | 6.2  | MAGUK p55 subfamily member 6                                                                                 |
| 4522                     | B9A001           | 2                    | 2              | 3.4                   | 582    | 65914  | 6.1  | Uncharacterized protein                                                                                      |
| 4523                     | C9JWC5           | 2                    | 3              | 7.5                   | 305    | 34866  | 7.5  | Uncharacterized protein                                                                                      |
| 4523                     | B4DVR0           | 2                    | 3              | 5.5                   | 420    | 47411  | 7.9  | cDNA FLJ51115, moderately similar to Tripartite motif-containing protein 22                                  |
| 4523                     | Q81YM9-2         | 2                    | 3              | 4.7                   | 494    | 56429  | 7.7  | Isoform 2 of E3 ubiquitin-protein ligase TRIM22                                                              |
| 4523                     | D3DQT1           | 2                    | 3              | 4.7                   | 494    | 56373  | 7.7  | Tripartite motif-containing 22, isoform CRA_a                                                                |
| 4523                     | A8K319           | 2                    | 3              | 4.6                   | 498    | 56892  | 7.6  | cDNA FLJ76655, highly similar to sapiens tripartite motif-containing 22, mRNA                                |
| 4523                     | Q81YM9           | 2                    | 3              | 4.6                   | 498    | 56947  | 7.7  | E3 ubiquitin-protein ligase TRIM22                                                                           |
| 4523                     | D3DQT0           | 2                    | 3              | 4.6                   | 498    | 56891  | 7.7  | Tripartite motif-containing 22, isoform CRA_b                                                                |
| 4524                     | Q3YEC7-5         | 2                    | 2              | 9.3                   | 258    | 29672  | 8.4  | Isoform 5 of Putative GTP-binding protein Parf                                                               |
| 4524                     | C6K8I5           | 2                    | 2              | 9.3                   | 257    | 29585  | 8.4  | Rab-like GTP-binding protein 1D                                                                              |
| 4524                     | C6K8I4           | 2                    | 2              | 7.6                   | 314    | 35809  | 7.7  | Rab-like GTP-binding protein 1C                                                                              |
| 4524                     | UPI000046FF02    | 2                    | 2              | 5                     | 484    | 53859  | 7.9  | UPI000046FF02 UniRef100 entry                                                                                |
| 4524                     | A8QVZ8           | 2                    | 2              | 4.6                   | 520    | 57397  | 8.3  | Chromosome 9 open reading frame 86                                                                           |
| 4524                     | C9JYJ3           | 2                    | 2              | 4.6                   | 521    | 57484  | 8.3  | Uncharacterized protein                                                                                      |
| 4524                     | Q3YEC7-2         | 2                    | 2              | 3.3                   | 730    | 79636  | 5.2  | Isoform 2 of Putative GTP-binding protein Parf                                                               |
| 4524                     | Q3YEC7           | 2                    | 2              | 3.3                   | 729    | 79549  | 5.2  | Putative GTP-binding protein Parf                                                                            |
| 4525                     | B4E1K0           | 2                    | 2              | 4.5                   | 673    | 77699  | 8    | cDNA FLJ58416, highly similar to Kinesin-like protein KIF23                                                  |
| 4525                     | Q02241-2         | 2                    | 2              | 3.5                   | 856    | 98105  | 8.5  | Isoform 2 of Kinesin-like protein KIF23                                                                      |
| 4525                     | UPI00015DFCE3    | 2                    | 2              | 3.1                   | 960    | 110099 | 8.5  | Kinesin-like protein KIF23 (Mitotic kinesin-like protein 1) (Kinesin-like protein 5).                        |
| 4525                     | Q02241           | 2                    | 2              | 3.1                   | 960    | 110059 | 8.5  | Kinesin-like protein KIF23                                                                                   |
| 4526                     | Q9UBT7-3         | 2                    | 2              | 4.9                   | 650    | 72616  | 7.1  | Isoform 3 of Alpha-catulin                                                                                   |
| 4526                     | Q9UBT7-2         | 2                    | 2              | 4.5                   | 718    | 80152  | 6.7  | Isoform 2 of Alpha-catulin                                                                                   |
| 4526                     | B2RBI4           | 2                    | 2              | 4.4                   | 734    | 81859  | 6.6  | cDNA, FLJ95528, highly similar to sapiens catenin (cadherin-associated protein), alpha-like 1 (CTNNA1), mRNA |
| 4526                     | Q9UBT7           | 2                    | 2              | 4.4                   | 734    | 81896  | 6.6  | Alpha-catulin                                                                                                |
| 4526                     | B3KMX6           | 2                    | 2              | 4.4                   | 734    | 81897  | 6.6  | cDNA FLJ12864 fis, clone NT2RP2003604, highly similar to Alpha-catulin                                       |
| 4527                     | B3KUM5           | 2                    | 2              | 4.4                   | 612    | 71321  | 5.8  | cDNA FLJ40245 fis, clone TESTI2023968, highly similar to GC-RICH SEQUENCE DNA-BINDING FACTOR                 |
| 4527                     | P16383-2         | 2                    | 2              | 3.6                   | 743    | 84847  | 6.2  | Isoform 2 of GC-rich sequence DNA-binding factor                                                             |
| 4527                     | P16383           | 2                    | 2              | 3.5                   | 781    | 89385  | 6    | GC-rich sequence DNA-binding factor                                                                          |
| 4528                     | B4E184           | 2                    | 6              | 4.4                   | 520    | 59613  | 5.3  | cDNA FLJ53267, highly similar to Optineurin                                                                  |
| 4528                     | B7ZA56           | 2                    | 6              | 4.4                   | 520    | 59560  | 5.2  | cDNA, FLJ79070, highly similar to Optineurin                                                                 |
| 4528                     | Q96CV9-2         | 2                    | 6              | 4                     | 571    | 65202  | 5.2  | Isoform 2 of Optineurin                                                                                      |
| 4528                     | Q96CV9           | 2                    | 6              | 4                     | 577    | 65921  | 5.2  | Optineurin                                                                                                   |
| 4529                     | O00186           | 2                    | 4              | 4.4                   | 592    | 67764  | 7.8  | Syntaxin-binding protein 3                                                                                   |
| 4530                     | Q6P3X3           | 2                    | 3              | 4.4                   | 843    | 96632  | 5.6  | Tetrapeptide repeat protein 27                                                                               |

Table S1. Proteins identified in the OVCAR-3 tumor supernatant by two or more unique peptides.

| Protein or Protein Group | Accession Number | Unique Peptide Count | Spectrum Count | Sequence Coverage (%) | Length | MolWt  | pI   | Descriptive Name                                                                                                                                                                             |
|--------------------------|------------------|----------------------|----------------|-----------------------|--------|--------|------|----------------------------------------------------------------------------------------------------------------------------------------------------------------------------------------------|
| 4531                     | B4DKY2           | 2                    | 5              | 4.3                   | 650    | 72763  | 5.2  | cDNA FLJ52322, highly similar to Tyrosine-protein phosphatase non-receptor type 12 (EC 3.1.3.48)                                                                                             |
| 4531                     | E9PBR5           | 2                    | 5              | 4.2                   | 661    | 74139  | 5.2  | Uncharacterized protein                                                                                                                                                                      |
| 4531                     | Q05209           | 2                    | 5              | 3.6                   | 780    | 88106  | 5.6  | Tyrosine-protein phosphatase non-receptor type 12                                                                                                                                            |
| 4532                     | Q9UBH6-2         | 2                    | 2              | 4.8                   | 631    | 73919  | 7.5  | Isoform 2 of Xenotropic and polytropic retrovirus receptor 1                                                                                                                                 |
| 4532                     | Q9UBH6           | 2                    | 2              | 4.3                   | 696    | 81535  | 8.4  | Xenotropic and polytropic retrovirus receptor 1                                                                                                                                              |
| 4533                     | B4DQ08           | 2                    | 2              | 4.2                   | 719    | 81947  | 8.1  | cDNA FLJ53406, highly similar to U3 small nucleolar RNA-associated protein 14 log A                                                                                                          |
| 4533                     | E9PEL7           | 2                    | 2              | 4.2                   | 719    | 82005  | 7.9  | Uncharacterized protein                                                                                                                                                                      |
| 4533                     | Q9BVJ6           | 2                    | 2              | 3.9                   | 771    | 87978  | 7.9  | U3 small nucleolar RNA-associated protein 14 log A                                                                                                                                           |
| 4534                     | Q96P63           | 2                    | 2              | 4.4                   | 405    | 46276  | 5.5  | Serpin B12                                                                                                                                                                                   |
| 4534                     | Q3SYB4           | 2                    | 2              | 4.2                   | 425    | 48446  | 5.4  | SERPINB12 protein                                                                                                                                                                            |
| 4535                     | Q9Y4R8           | 2                    | 6              | 4.1                   | 837    | 91747  | 5.8  | Telomere length regulation protein TEL2 log                                                                                                                                                  |
| 4536                     | E9PNS7           | 2                    | 2              | 4.5                   | 757    | 83489  | 6.1  | Uncharacterized protein                                                                                                                                                                      |
| 4536                     | B2RAF9           | 2                    | 2              | 4                     | 855    | 94751  | 6.5  | cDNA, FLJ94888, highly similar to sapiens suppression of tumorigenicity 14 (colon carcinoma, matriptase, epithin) (ST14), mRNA                                                               |
| 4536                     | Q9Y5Y6           | 2                    | 2              | 4                     | 855    | 94770  | 6.6  | Suppressor of tumorigenicity 14 protein                                                                                                                                                      |
| 4537                     | B7WP27           | 2                    | 2              | 4                     | 908    | 105524 | 7    | Uncharacterized protein                                                                                                                                                                      |
| 4537                     | Q9HCG8           | 2                    | 2              | 4                     | 908    | 105466 | 7    | Pre-mRNA-splicing factor CWC22 log                                                                                                                                                           |
| 4538                     | Q8IXB1-2         | 2                    | 2              | 4.3                   | 747    | 86136  | 7.4  | Isoform 2 of DnaJ log subfamily C member 10                                                                                                                                                  |
| 4538                     | Q8IXB1           | 2                    | 2              | 4                     | 793    | 91080  | 7.2  | DnaJ log subfamily C member 10                                                                                                                                                               |
| 4539                     | A2RRC9           | 2                    | 3              | 3.9                   | 1631   | 184517 | 7.5  | IQ motif containing GTPase activating protein 3                                                                                                                                              |
| 4539                     | UPI0000231C93    | 2                    | 3              | 3.9                   | 1631   | 184598 | 7.6  | ras GTPase-activating-like protein IQGAP3                                                                                                                                                    |
| 4539                     | Q86VI3           | 2                    | 3              | 3.9                   | 1631   | 184698 | 7.6  | Ras GTPase-activating-like protein IQGAP3                                                                                                                                                    |
| 4540                     | Q8N954           | 2                    | 2              | 3.9                   | 259    | 30199  | 5.2  | Coiled-coil domain-containing protein 75                                                                                                                                                     |
| 4541                     | B2RDL5           | 2                    | 2              | 3.6                   | 990    | 107277 | 6.3  | cDNA, FLJ96668, sapiens fucosylase (FUK), mRNA                                                                                                                                               |
| 4541                     | Q8N0W3-2         | 2                    | 2              | 3.5                   | 1090   | 118393 | 6.4  | Isoform 2 of L-fucose kinase                                                                                                                                                                 |
| 4541                     | Q8N0W3           | 2                    | 2              | 3.5                   | 1084   | 117623 | 6.3  | L-fucose kinase                                                                                                                                                                              |
| 4542                     | E9PCQ5           | 2                    | 2              | 3.8                   | 765    | 82479  | 7.7  | Uncharacterized protein                                                                                                                                                                      |
| 4542                     | Q8N3F8           | 2                    | 2              | 3.4                   | 863    | 93441  | 7.2  | MICAL-like protein 1                                                                                                                                                                         |
| 4543                     | E9PPE7           | 2                    | 2              | 5                     | 764    | 81488  | 4.6  | Uncharacterized protein                                                                                                                                                                      |
| 4543                     | A2RUM0           | 2                    | 2              | 3.7                   | 1025   | 109940 | 5    | Poly (ADP-ribose) polymerase family, member 10                                                                                                                                               |
| 4543                     | Q96K72           | 2                    | 2              | 3.7                   | 1025   | 109884 | 5    | cDNA FLJ14464 fis, clone MAMMA1000309                                                                                                                                                        |
| 4543                     | Q53GL7           | 2                    | 2              | 3.7                   | 1025   | 109998 | 5    | Poly (ADP-ribose) polymerase 10                                                                                                                                                              |
| 4543                     | E9PNI7           | 2                    | 2              | 3.7                   | 1037   | 111392 | 5    | Uncharacterized protein                                                                                                                                                                      |
| 4543                     | E9PK67           | 2                    | 2              | 3.7                   | 1016   | 109097 | 5    | Uncharacterized protein                                                                                                                                                                      |
| 4543                     | B4E0C4           | 2                    | 2              | 3.7                   | 1037   | 111406 | 5    | cDNA FLJ57250, highly similar to sapiens poly (ADP-ribose) polymerase family, member 10 (PARP10), mRNA                                                                                       |
| 4544                     | Q8WXA9           | 2                    | 10             | 3.7                   | 508    | 59380  | 10.4 | Splicing regulatory glutamine/lysine-rich protein 1                                                                                                                                          |
| 4545                     | Q9BRZ2           | 2                    | 4              | 3.7                   | 755    | 81488  | 7.7  | E3 ubiquitin-protein ligase TRIM56                                                                                                                                                           |
| 4546                     | P14384           | 2                    | 2              | 3.6                   | 443    | 50514  | 7.4  | Carboxypeptidase M                                                                                                                                                                           |
| 4547                     | P51511           | 2                    | 3              | 3.6                   | 669    | 75807  | 7.5  | Matrix metalloproteinase-15                                                                                                                                                                  |
| 4548                     | C9JP68           | 2                    | 2              | 3.5                   | 780    | 85605  | 5.1  | Uncharacterized protein                                                                                                                                                                      |
| 4548                     | UPI0000E0C769    | 2                    | 2              | 2                     | 1341   | 149425 | 5.9  | immunoglobulin superfamily member 1 isoform 3                                                                                                                                                |
| 4548                     | Q8N6C5-2         | 2                    | 2              | 2                     | 1327   | 147972 | 5.8  | Isoform 2 of Immunoglobulin superfamily member 1                                                                                                                                             |
| 4548                     | Q8N6C5           | 2                    | 2              | 2                     | 1336   | 148935 | 5.9  | Immunoglobulin superfamily member 1                                                                                                                                                          |
| 4549                     | Q53FX3           | 2                    | 2              | 3.5                   | 941    | 107768 | 6.9  | Vacuolar protein sorting 11 (Yeast log) variant (Fragment)                                                                                                                                   |
| 4549                     | UPI0000161C99    | 2                    | 2              | 3.5                   | 941    | 107809 | 7.1  | vacuolar protein sorting-associated protein 11 log                                                                                                                                           |
| 4549                     | Q9H270           | 2                    | 2              | 3.5                   | 941    | 107837 | 7.1  | Vacuolar protein sorting-associated protein 11 log                                                                                                                                           |
| 4549                     | Q658K0           | 2                    | 2              | 3.5                   | 940    | 107641 | 7    | Putative uncharacterized protein DKFZp564P2364                                                                                                                                               |
| 4550                     | Q8N4U5           | 2                    | 2              | 3.5                   | 519    | 58091  | 5    | T-complex protein 11-like protein 2                                                                                                                                                          |
| 4551                     | Q8ND04-3         | 2                    | 2              | 6                     | 588    | 65088  | 7.7  | Isoform 3 of Protein SMG8                                                                                                                                                                    |
| 4551                     | Q8ND04           | 2                    | 2              | 3.5                   | 991    | 109684 | 7.7  | Protein SMG8                                                                                                                                                                                 |
| 4551                     | Q8ND04-2         | 2                    | 2              | 3.4                   | 1023   | 113334 | 7.7  | Isoform 2 of Protein SMG8                                                                                                                                                                    |
| 4552                     | Q9H1H9-3         | 2                    | 2              | 3.5                   | 1749   | 196069 | 5.7  | Isoform 3 of Kinesin-like protein KIF13A                                                                                                                                                     |
| 4553                     | Q9Y5B0           | 2                    | 2              | 3.5                   | 961    | 104399 | 5.3  | RNA polymerase II subunit A C-terminal domain phosphatase                                                                                                                                    |
| 4554                     | A8K6X5           | 2                    | 4              | 3.4                   | 1068   | 122248 | 7.2  | cDNA FLJ78680, highly similar to sapiens dishevelled associated activator of morphogenesis 1, mRNA                                                                                           |
| 4554                     | Q9Y4D1-2         | 2                    | 4              | 3.4                   | 1068   | 122306 | 7.2  | Isoform 2 of Dishevelled-associated activator of morphogenesis 1                                                                                                                             |
| 4554                     | Q9Y4D1           | 2                    | 4              | 3.3                   | 1078   | 123473 | 7.2  | Dishevelled-associated activator of morphogenesis 1                                                                                                                                          |
| 4555                     | Q3KQU3-3         | 2                    | 2              | 5                     | 377    | 42105  | 9.2  | Isoform 3 of MAP7 domain-containing protein 1                                                                                                                                                |
| 4555                     | B5MDZ6           | 2                    | 2              | 3.4                   | 552    | 60987  | 9.9  | Uncharacterized protein                                                                                                                                                                      |
| 4555                     | Q6NX58           | 2                    | 2              | 2.8                   | 678    | 75668  | 10.3 | MAP7D1 protein (Fragment)                                                                                                                                                                    |
| 4555                     | Q3KQU3-4         | 2                    | 2              | 2.4                   | 808    | 89467  | 10.1 | Isoform 4 of MAP7 domain-containing protein 1                                                                                                                                                |
| 4555                     | Q3KQU3-2         | 2                    | 2              | 2.4                   | 803    | 88726  | 10.1 | Isoform 2 of MAP7 domain-containing protein 1                                                                                                                                                |
| 4555                     | Q3KQU3           | 2                    | 2              | 2.3                   | 841    | 92820  | 10.1 | MAP7 domain-containing protein 1                                                                                                                                                             |
| 4555                     | D3DPS3           | 2                    | 2              | 2.3                   | 840    | 92692  | 10.1 | Arginine/proline rich coiled-coil 1, isoform CRA_b                                                                                                                                           |
| 4556                     | Q92541           | 2                    | 3              | 3.4                   | 710    | 80314  | 8.2  | RNA polymerase-associated protein RTF1 log                                                                                                                                                   |
| 4557                     | B4E3T7           | 2                    | 3              | 3.5                   | 1090   | 122310 | 4.9  | cDNA FLJ55448, highly similar to Nuclear pore complex protein Nup133                                                                                                                         |
| 4557                     | B4E206           | 2                    | 3              | 3.3                   | 1140   | 127402 | 5    | Nup133                                                                                                                                                                                       |
| 4557                     | Q8WUM0           | 2                    | 3              | 3.3                   | 1156   | 128979 | 5.1  | Nuclear pore complex protein Nup133                                                                                                                                                          |
| 4558                     | B4E0F9           | 2                    | 5              | 6.1                   | 408    | 45499  | 9.3  | cDNA FLJ60383, highly similar to Ubiquitin-like PHD and RING fingerdomain-containing protein 1 (EC 6.3.2.-)                                                                                  |
| 4558                     | A8K024           | 2                    | 5              | 3.2                   | 793    | 89842  | 7.3  | cDNA FLJ78091, highly similar to sapiens ubiquitin-like, containing PHD and RING finger domains, 1 (UHRF1), mRNA                                                                             |
| 4558                     | UPI0000456BDE    | 2                    | 5              | 3.2                   | 792    | 89743  | 7.6  | UPI0000456BDE UniRef100 entry                                                                                                                                                                |
| 4558                     | Q96T88           | 2                    | 5              | 3.2                   | 793    | 89814  | 7.6  | E3 ubiquitin-protein ligase UHRF1                                                                                                                                                            |
| 4558                     | B2RBA9           | 2                    | 5              | 3.2                   | 793    | 89843  | 7.7  | cDNA, FLJ95411, highly similar to sapiens ubiquitin-like, containing PHD and RING finger domains, 1 (UHRF1), mRNA                                                                            |
| 4558                     | UPI0001AE63C5    | 2                    | 5              | 3.1                   | 805    | 91013  | 7.4  | E3 ubiquitin-protein ligase UHRF1 (EC 6.3.2.-) (Ubiquitin-like PHD and RING finger domain-containing protein 1) (Inverted CCAAT box-binding protein of 90 kDa) (Transcription factor ICBP90) |
| 4558                     | Q2HIX7           | 2                    | 5              | 3.1                   | 806    | 91116  | 7.4  | Ubiquitin-like with PHD and ring finger domains 1                                                                                                                                            |
| 4559                     | UPI0001C0B383    | 2                    | 3              | 3.9                   | 722    | 77731  | 5.4  | breast cancer anti-estrogen resistance protein 1 isoform 8                                                                                                                                   |
| 4559                     | B7Z7X7           | 2                    | 3              | 3.9                   | 722    | 77759  | 5.5  | cDNA FLJ5908, highly similar to Breast cancer anti-estrogen resistance protein 1                                                                                                             |
| 4559                     | B2RBL9           | 2                    | 3              | 3.2                   | 870    | 93405  | 5.6  | cDNA, FLJ95582, highly similar to sapiens breast cancer anti-estrogen resistance 1 (BCAR1), mRNA                                                                                             |
| 4559                     | UPI0001C0B382    | 2                    | 3              | 3.2                   | 888    | 95454  | 5.9  | breast cancer anti-estrogen resistance protein 1 isoform 4                                                                                                                                   |
| 4559                     | UPI00001FFC19    | 2                    | 3              | 3.2                   | 870    | 93291  | 5.6  | breast cancer anti-estrogen resistance protein 1 isoform 5                                                                                                                                   |
| 4559                     | Q6QEF7           | 2                    | 3              | 3.2                   | 888    | 95339  | 6    | Breast cancer anti-estrogen resistance 1                                                                                                                                                     |
| 4559                     | Q6P5Z4           | 2                    | 3              | 3.2                   | 870    | 93389  | 5.7  | Breast cancer anti-estrogen resistance 1                                                                                                                                                     |
| 4559                     | P56945           | 2                    | 3              | 3.2                   | 870    | 93372  | 5.7  | Breast cancer anti-estrogen resistance protein 1                                                                                                                                             |
| 4559                     | E9PCV2           | 2                    | 3              | 3.2                   | 888    | 95216  | 5.7  | Uncharacterized protein                                                                                                                                                                      |
| 4559                     | D3DUK1           | 2                    | 3              | 3.2                   | 888    | 95206  | 5.7  | Breast cancer anti-estrogen resistance 1, isoform CRA_a                                                                                                                                      |
| 4559                     | B4DIW5           | 2                    | 3              | 3.2                   | 888    | 95469  | 5.7  | cDNA FLJ55515, highly similar to Breast cancer anti-estrogen resistanceprotein 1                                                                                                             |

Table S1. Proteins identified in the OVCAR-3 tumor supernatant by two or more unique peptides.

| Protein or Protein Group | Accession Number | Unique Peptide Count | Spectrum Count | Sequence Coverage (%) | Length | MolWt  | pI  | Descriptive Name                                                                                                 |
|--------------------------|------------------|----------------------|----------------|-----------------------|--------|--------|-----|------------------------------------------------------------------------------------------------------------------|
| 4559                     | B3KWD7           | 2                    | 3              | 3.2                   | 888    | 95246  | 5.7 | cDNA FLJ42825 fis, clone BRCAN2016619, highly similar to Breast cancer anti-estrogen resistance protein 1        |
| 4559                     | E9PCL5           | 2                    | 3              | 3.1                   | 916    | 97877  | 5.6 | Uncharacterized protein                                                                                          |
| 4559                     | B4DEV4           | 2                    | 3              | 3.1                   | 916    | 97867  | 5.6 | cDNA FLJ56057, highly similar to Breast cancer anti-estrogen resistance protein 1                                |
| 4560                     | Q9UQ88-5         | 2                    | 2              | 6.3                   | 397    | 45229  | 9.2 | Isoform SV7 of Cyclin-dependent kinase 11A                                                                       |
| 4560                     | Q96CA8           | 2                    | 2              | 5.4                   | 464    | 52406  | 5.1 | CDC2L2 protein (Fragment)                                                                                        |
| 4560                     | P21127-4         | 2                    | 2              | 5.4                   | 461    | 51925  | 5.2 | Isoform 3 of Cyclin-dependent kinase 11B                                                                         |
| 4560                     | Q6P5Y5           | 2                    | 2              | 5.3                   | 475    | 53688  | 4.8 | CDC2L2 protein (Fragment)                                                                                        |
| 4560                     | Q4VBY6           | 2                    | 2              | 5.3                   | 475    | 53757  | 4.8 | CDC2L2 protein (Fragment)                                                                                        |
| 4560                     | P21127-10        | 2                    | 2              | 4.4                   | 565    | 63937  | 4.7 | Isoform SV11 of Cyclin-dependent kinase 11B                                                                      |
| 4560                     | Q5QPR4           | 2                    | 2              | 3.4                   | 746    | 86824  | 5.3 | Cell division cycle 2-like 2 (PITSLRE proteins)                                                                  |
| 4560                     | P21127-6         | 2                    | 2              | 3.4                   | 738    | 86063  | 5.3 | Isoform SV5 of Cyclin-dependent kinase 11B                                                                       |
| 4560                     | E9PGA8           | 2                    | 2              | 3.4                   | 735    | 85596  | 5.3 | Uncharacterized protein                                                                                          |
| 4560                     | E7ERC1           | 2                    | 2              | 3.4                   | 746    | 86755  | 5.4 | Uncharacterized protein                                                                                          |
| 4560                     | P21127-9         | 2                    | 2              | 3.3                   | 748    | 87138  | 5.4 | Isoform SV10 of Cyclin-dependent kinase 11B                                                                      |
| 4560                     | B4E3D9           | 2                    | 2              | 3.2                   | 772    | 90235  | 5.4 | cDNA FLJ59152, highly similar to PITSLRE serine/threonine-protein kinaseCDC2L1 (EC 2.7.11.22)                    |
| 4560                     | UPI0001AE7818    | 2                    | 2              | 3.2                   | 780    | 90949  | 5.4 | PITSLRE serine/threonine-protein kinase CDC2L2 (EC 2.7.11.22)                                                    |
| 4560                     | UPI0000160F88    | 2                    | 2              | 3.2                   | 771    | 90047  | 5.4 | (Galactosyltransferase-associated protein kinase p58/GTA) (Cell division cycle 2-like protein kinase 2) (CDK11). |
| 4560                     | UPI0000160F86    | 2                    | 2              | 3.2                   | 780    | 91009  | 5.4 | cyclin-dependent kinase 11B isoform 9                                                                            |
| 4560                     | Q9UQ88-4         | 2                    | 2              | 3.2                   | 770    | 90045  | 5.3 | cyclin-dependent kinase 11B isoform 8                                                                            |
| 4560                     | Q9UQ88-3         | 2                    | 2              | 3.2                   | 779    | 91055  | 5.3 | Isoform SV3 of Cyclin-dependent kinase 11A                                                                       |
| 4560                     | Q9UQ88-2         | 2                    | 2              | 3.2                   | 780    | 91018  | 5.4 | Isoform SV2 of Cyclin-dependent kinase 11A                                                                       |
| 4560                     | Q9UQ88           | 2                    | 2              | 3.2                   | 783    | 91362  | 5.4 | Isoform SV1 of Cyclin-dependent kinase 11A                                                                       |
| 4560                     | Q5QPR3           | 2                    | 2              | 3.2                   | 779    | 91007  | 5.3 | Cyclin-dependent kinase 11A                                                                                      |
| 4560                     | P21127-8         | 2                    | 2              | 3.2                   | 772    | 90256  | 5.4 | Cell division cycle 2-like 2 (PITSLRE proteins)                                                                  |
| 4560                     | P21127-3         | 2                    | 2              | 3.2                   | 781    | 91219  | 5.4 | Isoform 8 of Cyclin-dependent kinase 11B                                                                         |
| 4560                     | P21127-2         | 2                    | 2              | 3.2                   | 782    | 91332  | 5.5 | Isoform 2 of Cyclin-dependent kinase 11B                                                                         |
| 4560                     | E7EP51           | 2                    | 2              | 3.2                   | 778    | 90752  | 5.4 | Isoform SV1 of Cyclin-dependent kinase 11B                                                                       |
| 4560                     | B7ZVY7           | 2                    | 2              | 3.2                   | 782    | 91303  | 5.5 | Uncharacterized protein                                                                                          |
| 4560                     | P21127           | 2                    | 2              | 3.1                   | 795    | 92707  | 5.6 | Cell division cycle 2-like 1 (PITSLRE proteins)                                                                  |
| 4560                     | E7EUE4           | 2                    | 2              | 3.1                   | 797    | 91867  | 5.4 | Cyclin-dependent kinase 11B                                                                                      |
| 4561                     | P42338           | 2                    | 4              | 3.1                   | 1070   | 122762 | 7.1 | Uncharacterized protein                                                                                          |
| 4562                     | B4DG99           | 2                    | 3              | 3                     | 1024   | 115310 | 7   | Phosphatidylinositol-4,5-bisphosphate 3-kinase catalytic subunit beta isoform                                    |
| 4562                     | Q8NHU6           | 2                    | 3              | 2.8                   | 1098   | 123585 | 7.2 | cDNA FLJ60247, highly similar to Tudor domain-containing protein 7                                               |
| 4563                     | Q6ZMP0-3         | 2                    | 7              | 9.1                   | 219    | 24246  | 9.4 | Tudor domain-containing protein 7                                                                                |
| 4563                     | B4E1J6           | 2                    | 7              | 6.1                   | 329    | 36378  | 7.8 | Isoform 3 of Thrombospondin type-1 domain-containing protein 4                                                   |
| 4563                     | Q6ZMP0-2         | 2                    | 7              | 3.8                   | 523    | 56628  | 8.9 | cDNA FLJ54862, weakly similar to sapiens thrombospondin repeat containing 1 (TSRC1), transcript variant 2, mRNA  |
| 4563                     | B4DR13           | 2                    | 7              | 3                     | 658    | 73409  | 6   | Isoform 2 of Thrombospondin type-1 domain-containing protein 4                                                   |
| 4563                     | Q6ZMP0           | 2                    | 7              | 2                     | 1018   | 112450 | 7.6 | cDNA FLJ53165, weakly similar to sapiens thrombospondin repeat containing 1 (TSRC1), transcript variant 1, mRNA  |
| 4564                     | B4DTQ6           | 2                    | 2              | 3                     | 944    | 106506 | 6.9 | Thrombospondin type-1 domain-containing protein 4                                                                |
| 4564                     | Q70J99           | 2                    | 2              | 2.6                   | 1090   | 123282 | 6.7 | cDNA FLJ54883, highly similar to Unc-13 log D                                                                    |
| 4564                     | Q70J99-3         | 2                    | 2              | 2.5                   | 1142   | 128819 | 6.6 | Protein unc-13 log D                                                                                             |
| 4565                     | D6RD46           | 2                    | 18             | 3                     | 980    | 109935 | 6.5 | Isoform 3 of Protein unc-13 log D                                                                                |
| 4565                     | Q9UPQ0-4         | 2                    | 18             | 2.7                   | 1069   | 120496 | 6.6 | Uncharacterized protein                                                                                          |
| 4565                     | Q9UPQ0-2         | 2                    | 18             | 2.7                   | 1057   | 119078 | 6.3 | Isoform 4 of LIM and calponin logy domains-containing protein 1                                                  |
| 4565                     | Q9UPQ0           | 2                    | 18             | 2.7                   | 1083   | 121867 | 6.5 | Isoform 2 of LIM and calponin logy domains-containing protein 1                                                  |
| 4565                     | E9PHM7           | 2                    | 18             | 2.7                   | 1056   | 118950 | 6.3 | LIM and calponin logy domains-containing protein 1                                                               |
| 4566                     | C9JFV6           | 2                    | 3              | 2.9                   | 1162   | 124218 | 8.7 | Uncharacterized protein                                                                                          |
| 4566                     | Q92618           | 2                    | 3              | 2.9                   | 1163   | 124289 | 8.7 | Uncharacterized protein                                                                                          |
| 4567                     | P32019-2         | 2                    | 2              | 3.2                   | 913    | 103987 | 5.4 | Zinc finger protein 516                                                                                          |
| 4567                     | P32019           | 2                    | 2              | 2.9                   | 993    | 112852 | 5.6 | Isoform 2 of Type II inositol-1,4,5-trisphosphate 5-phosphatase                                                  |
| 4568                     | UPI000022C483    | 2                    | 2              | 5.2                   | 366    | 41735  | 8   | Type II inositol-1,4,5-trisphosphate 5-phosphatase                                                               |
| 4568                     | D6RDW3           | 2                    | 2              | 3                     | 624    | 70184  | 7.4 | guanylate cyclase soluble subunit alpha-3 isoform C                                                              |
| 4568                     | B3KU69           | 2                    | 2              | 2.8                   | 690    | 77353  | 7   | Uncharacterized protein                                                                                          |
| 4568                     | Q02108           | 2                    | 2              | 2.8                   | 690    | 77453  | 7   | cDNA FLJ39269 fis, clone OCBFB2010420, highly similar to Guanylate cyclase soluble subunit alpha-3 (EC 4.6.1.2)  |
| 4569                     | Q5T5P2-4         | 2                    | 13             | 4.4                   | 866    | 95123  | 8.2 | Guanylate cyclase soluble subunit alpha-3                                                                        |
| 4569                     | Q5T5P2-8         | 2                    | 13             | 4.2                   | 906    | 99494  | 8.5 | Isoform 4 of Sickle tail protein log                                                                             |
| 4569                     | Q5T5P2-6         | 2                    | 13             | 4.1                   | 932    | 102692 | 7.8 | Isoform 7 of Sickle tail protein log                                                                             |
| 4569                     | Q5T5P1           | 2                    | 13             | 4.1                   | 933    | 103666 | 9.1 | Isoform 6 of Sickle tail protein log                                                                             |
| 4569                     | UPI0001533DB3    | 2                    | 13             | 2.9                   | 1309   | 143053 | 9.1 | KIAA1217 (Fragment)                                                                                              |
| 4569                     | Q5T5P2-7         | 2                    | 13             | 2.8                   | 1349   | 147424 | 9.1 | sickle tail protein log isoform 3                                                                                |
| 4569                     | Q5T5P2-2         | 2                    | 13             | 2.8                   | 1344   | 146878 | 9.2 | Isoform 5 of Sickle tail protein log                                                                             |
| 4569                     | B9EGK4           | 2                    | 13             | 2.8                   | 1374   | 150523 | 9   | Isoform 2 of Sickle tail protein log                                                                             |
| 4569                     | B7ZM29           | 2                    | 13             | 2.8                   | 1349   | 147440 | 9.1 | KIAA1217 protein                                                                                                 |
| 4569                     | A6NLF3           | 2                    | 13             | 2.7                   | 1410   | 154447 | 9.1 | KIAA1217 protein                                                                                                 |
| 4569                     | C9JRK3           | 2                    | 13             | 2.6                   | 1461   | 161951 | 6.2 | Uncharacterized protein                                                                                          |
| 4569                     | E9PHU3           | 2                    | 13             | 2.5                   | 1534   | 168161 | 6.9 | Uncharacterized protein                                                                                          |
| 4569                     | B4DTY7           | 2                    | 13             | 2.5                   | 1532   | 167981 | 6.9 | cDNA FLJ57813, weakly similar to p130Cas-associated protein                                                      |
| 4569                     | Q5T5P2           | 2                    | 13             | 2                     | 1943   | 214114 | 7.1 | Uncharacterized protein                                                                                          |
| 4570                     | Q59HA5           | 2                    | 11             | 2.8                   | 1196   | 130790 | 5.8 | Sickle tail protein log                                                                                          |
| 4570                     | B4DS37           | 2                    | 11             | 2.7                   | 1213   | 132145 | 5.7 | Cyclin G-associated kinase variant (Fragment)                                                                    |
| 4570                     | Q5U4P5           | 2                    | 11             | 2.7                   | 1232   | 134410 | 5.8 | cDNA FLJ58258, highly similar to Cyclin G-associated kinase (EC 2.7.11.1)                                        |
| 4570                     | E9PGR2           | 2                    | 11             | 2.7                   | 1232   | 134464 | 5.8 | GAK protein                                                                                                      |
| 4570                     | O14976           | 2                    | 11             | 2.5                   | 1311   | 143190 | 5.7 | Uncharacterized protein                                                                                          |
| 4571                     | Q86VM9-2         | 2                    | 4              | 3.4                   | 757    | 84100  | 5.6 | Cyclin-G-associated kinase                                                                                       |
| 4571                     | C9JA72           | 2                    | 4              | 3.4                   | 757    | 84086  | 5.6 | Isoform 2 of Zinc finger CCCH domain-containing protein 18                                                       |
| 4571                     | B4DTK7           | 2                    | 4              | 2.7                   | 977    | 108978 | 8.4 | Uncharacterized protein                                                                                          |
| 4571                     | Q86VM9           | 2                    | 4              | 2.7                   | 953    | 106379 | 8.3 | cDNA FLJ61387, highly similar to sapiens conserved nuclear protein NHN1 (NHN1), mRNA                             |
| 4571                     | E7ERS3           | 2                    | 4              | 2.7                   | 977    | 108940 | 8.4 | Zinc finger CCCH domain-containing protein 18                                                                    |
| 4572                     | Q8WVK6           | 2                    | 2              | 7.6                   | 343    | 37501  | 5.9 | Uncharacterized protein                                                                                          |
| 4572                     | E1CJT9           | 2                    | 2              | 7.6                   | 343    | 37467  | 5.9 | IREB2 protein                                                                                                    |
| 4572                     | D3DW85           | 2                    | 2              | 2.7                   | 963    | 105046 | 7.1 | Iron-responsive element binding protein 2 variant                                                                |
| 4572                     | P48200           | 2                    | 2              | 2.7                   | 963    | 105044 | 7.1 | Iron-responsive element binding protein 2, isoform CRA_a                                                         |
| 4573                     | A6NDZ9           | 2                    | 2              | 2.6                   | 1038   | 109883 | 4.3 | Iron-responsive element-binding protein 2                                                                        |
| 4573                     | O15451           | 2                    | 2              | 2.6                   | 1021   | 109140 | 4.3 | Uncharacterized protein                                                                                          |
| 4573                     | Q8IZL8           | 2                    | 2              | 2.4                   | 1130   | 119700 | 4.3 | Proline and glutamic acid rich nuclear protein isoform (Fragment)                                                |
| 4573                     | A8K548           | 2                    | 2              | 2.4                   | 1130   | 119642 | 4.3 | Proline-, glutamic acid- and leucine-rich protein 1                                                              |
| 4573                     | B4DR36           | 2                    | 2              | 2.3                   | 1180   | 124868 | 4.4 | cDNA FLJ75008, highly similar to sapiens proline-, glutamic acid-, leucine-rich protein 1 (PELP1), mRNA          |
| 4573                     | Q8IZL8-2         | 2                    | 2              | 2.1                   | 1275   | 135495 | 4.4 | cDNA FLJ56414, highly similar to sapiens proline-, glutamic acid-, leucine-rich protein 1 (PELP1), mRNA          |
| 4573                     | Q8IZL8-2         | 2                    | 2              | 2.1                   | 1275   | 135495 | 4.4 | Isoform 2 of Proline-, glutamic acid- and leucine-rich protein 1                                                 |

Table S1. Proteins identified in the OVCAR-3 tumor supernatant by two or more unique peptides.

| Protein or Protein Group | Accession Number | Unique Peptide Count | Spectrum Count | Sequence Coverage (%) | Length | MolWt  | pI   | Descriptive Name                                                                                                                                                              |
|--------------------------|------------------|----------------------|----------------|-----------------------|--------|--------|------|-------------------------------------------------------------------------------------------------------------------------------------------------------------------------------|
| 4573                     | C9JFV4           | 2                    | 2              | 2.1                   | 1274   | 135512 | 4.4  | Uncharacterized protein                                                                                                                                                       |
| 4574                     | O60245           | 2                    | 2              | 2.6                   | 1069   | 116071 | 5.2  | Protocadherin-7                                                                                                                                                               |
| 4574                     | O60245-2         | 2                    | 2              | 2.6                   | 1072   | 116429 | 5.2  | Isoform B of Protocadherin-7                                                                                                                                                  |
| 4574                     | O60245-3         | 2                    | 2              | 2.3                   | 1200   | 130303 | 5.2  | Isoform C of Protocadherin-7                                                                                                                                                  |
| 4574                     | UPI0001CB27C3    | 2                    | 2              | 2.2                   | 1255   | 136570 | 5.2  | protocadherin-7 isoform d precursor                                                                                                                                           |
| 4574                     | UPI0001CB27C2    | 2                    | 2              | 2.2                   | 1247   | 135672 | 5.2  | protocadherin-7 isoform c precursor                                                                                                                                           |
| 4575                     | Q02413           | 2                    | 2              | 2.6                   | 1049   | 113748 | 5    | Desmoglein-1                                                                                                                                                                  |
| 4576                     | Q9BXW9-3         | 2                    | 3              | 3                     | 1249   | 140737 | 6.1  | Isoform 3 of Fanconi anemia group D2 protein                                                                                                                                  |
| 4576                     | Q9BXW9           | 2                    | 3              | 2.6                   | 1471   | 166461 | 6.2  | Fanconi anemia group D2 protein                                                                                                                                               |
| 4576                     | Q9BXW9-2         | 2                    | 3              | 2.6                   | 1451   | 164128 | 5.9  | Isoform 2 of Fanconi anemia group D2 protein                                                                                                                                  |
| 4577                     | B4DZ36           | 2                    | 2              | 2.5                   | 1156   | 129834 | 6.9  | cDNA FLJ58441, highly similar to Attractin                                                                                                                                    |
| 4577                     | O75882-3         | 2                    | 2              | 2.4                   | 1198   | 133701 | 7    | Isoform 3 of Attractin                                                                                                                                                        |
| 4577                     | C9J7K1           | 2                    | 2              | 2.3                   | 1268   | 140942 | 7.1  | Uncharacterized protein                                                                                                                                                       |
| 4577                     | C9IZD4           | 2                    | 2              | 2.3                   | 1272   | 141413 | 7    | Uncharacterized protein                                                                                                                                                       |
| 4577                     | O75882           | 2                    | 2              | 2                     | 1429   | 158536 | 7.3  | Attractin                                                                                                                                                                     |
| 4578                     | P11137           | 2                    | 3              | 2.4                   | 1827   | 199525 | 4.9  | Microtubule-associated protein 2                                                                                                                                              |
| 4578                     | P11137-3         | 2                    | 3              | 2.4                   | 1823   | 199082 | 4.9  | Isoform 3 of Microtubule-associated protein 2                                                                                                                                 |
| 4579                     | B7Z6Q8           | 2                    | 2              | 2.5                   | 935    | 104507 | 7    | Ephrin receptor                                                                                                                                                               |
| 4579                     | Q58F15           | 2                    | 2              | 2.4                   | 949    | 105744 | 6.2  | Ephrin receptor                                                                                                                                                               |
| 4579                     | A8K2P1           | 2                    | 2              | 2.3                   | 986    | 109831 | 6.6  | Ephrin receptor                                                                                                                                                               |
| 4579                     | P54764           | 2                    | 2              | 2.3                   | 986    | 109860 | 6.6  | Ephrin type-A receptor 4                                                                                                                                                      |
| 4579                     | B2R601           | 2                    | 2              | 2.3                   | 986    | 109846 | 6.6  | Ephrin receptor                                                                                                                                                               |
| 4580                     | O43314-2         | 2                    | 4              | 2.4                   | 1222   | 138106 | 8.1  | Isoform 2 of Inositol hexakisphosphate and diphosphoinositol-pentakisphosphate kinase 2                                                                                       |
| 4580                     | B4DGV1           | 2                    | 4              | 2.3                   | 1270   | 143477 | 7.5  | cDNA FLJ61589 (Fragment)                                                                                                                                                      |
| 4580                     | O43314           | 2                    | 4              | 2.3                   | 1243   | 140406 | 8.2  | Inositol hexakisphosphate and diphosphoinositol-pentakisphosphate kinase 2                                                                                                    |
| 4580                     | E9PGM8           | 2                    | 4              | 2.3                   | 1278   | 144399 | 7.9  | Uncharacterized protein                                                                                                                                                       |
| 4581                     | Q96S69           | 2                    | 2              | 8.5                   | 260    | 29060  | 6.5  | Pex1pQ261Ter                                                                                                                                                                  |
| 4581                     | Q96S70           | 2                    | 2              | 3.5                   | 632    | 71221  | 6.9  | Pex1pR633Ter                                                                                                                                                                  |
| 4581                     | B4DIM7           | 2                    | 2              | 2.3                   | 961    | 105955 | 6.3  | cDNA FLJ50168, highly similar to Peroxisome biogenesis factor 1                                                                                                               |
| 4581                     | E9PE75           | 2                    | 2              | 2.3                   | 961    | 105999 | 6.2  | Uncharacterized protein                                                                                                                                                       |
| 4581                     | O43933           | 2                    | 2              | 1.7                   | 1283   | 142867 | 6.3  | Peroxisome biogenesis factor 1                                                                                                                                                |
| 4582                     | Q6NUQ2           | 2                    | 9              | 2.3                   | 1002   | 111640 | 4.9  | Calmin (Calponin-like, transmembrane)                                                                                                                                         |
| 4582                     | Q96JQ2           | 2                    | 9              | 2.3                   | 1002   | 111651 | 4.9  | Calmin                                                                                                                                                                        |
| 4583                     | Q7Z3T8           | 2                    | 2              | 2.3                   | 1539   | 168903 | 4.8  | Zinc finger FYVE domain-containing protein 16                                                                                                                                 |
| 4583                     | UPI00015CFC08    | 2                    | 2              | 2.3                   | 1539   | 168860 | 4.8  | zinc finger FYVE domain-containing protein 16                                                                                                                                 |
| 4584                     | Q8IVG5           | 2                    | 2              | 2.3                   | 1584   | 184531 | 8    | Sterile alpha motif domain-containing protein 9-like                                                                                                                          |
| 4585                     | O75665-3         | 2                    | 3              | 2.3                   | 972    | 111745 | 5.9  | Isoform 3 of Oral-facial-digital syndrome 1 protein                                                                                                                           |
| 4585                     | A8K2T9           | 2                    | 3              | 2.2                   | 1011   | 116543 | 6.1  | cDNA FLJ78705, highly similar to sapiens oral-facial-digital syndrome 1 (OFD1), mRNA                                                                                          |
| 4585                     | O75665           | 2                    | 3              | 2.2                   | 1012   | 116671 | 6.1  | Oral-facial-digital syndrome 1 protein                                                                                                                                        |
| 4586                     | O60382           | 2                    | 2              | 2.2                   | 1791   | 191306 | 11.9 | KIAA0324 (Fragment)                                                                                                                                                           |
| 4586                     | Q9UQ35           | 2                    | 2              | 1.4                   | 2752   | 299616 | 12.1 | Serine/arginine repetitive matrix protein 2                                                                                                                                   |
| 4587                     | Q14004-2         | 2                    | 3              | 2.3                   | 1452   | 158434 | 9.7  | Isoform 2 of Cyclin-dependent kinase 13                                                                                                                                       |
| 4587                     | Q14004           | 2                    | 3              | 2.2                   | 1512   | 164922 | 9.7  | Cyclin-dependent kinase 13                                                                                                                                                    |
| 4588                     | Q5VU97           | 2                    | 6              | 2.2                   | 1274   | 142289 | 6.4  | VWFA and cache domain-containing protein 1                                                                                                                                    |
| 4589                     | Q86U86-6         | 2                    | 9              | 3.5                   | 856    | 99142  | 8.2  | Isoform 6 of Protein polybromo-1                                                                                                                                              |
| 4589                     | UPI00018814F4    | 2                    | 9              | 2.8                   | 1085   | 126292 | 6.9  | UPI00018814F4 UniRef100 entry                                                                                                                                                 |
| 4589                     | E7EVG2           | 2                    | 9              | 2.1                   | 1461   | 168505 | 6.6  | Uncharacterized protein                                                                                                                                                       |
| 4589                     | Q86U86-9         | 2                    | 9              | 1.9                   | 1609   | 184041 | 6.7  | Isoform 9 of Protein polybromo-1                                                                                                                                              |
| 4589                     | Q86U86-7         | 2                    | 9              | 1.9                   | 1597   | 183884 | 6.9  | Isoform 7 of Protein polybromo-1                                                                                                                                              |
| 4589                     | Q86U86-5         | 2                    | 9              | 1.9                   | 1582   | 182117 | 6.8  | Isoform 5 of Protein polybromo-1                                                                                                                                              |
| 4589                     | Q86U86-4         | 2                    | 9              | 1.9                   | 1582   | 181084 | 6.9  | Isoform 4 of Protein polybromo-1                                                                                                                                              |
| 4589                     | Q86U86-3         | 2                    | 9              | 1.9                   | 1602   | 183689 | 6.7  | Isoform 3 of Protein polybromo-1                                                                                                                                              |
| 4589                     | Q86U86-8         | 2                    | 9              | 1.8                   | 1652   | 189643 | 7    | Isoform 8 of Protein polybromo-1                                                                                                                                              |
| 4589                     | Q86U86-2         | 2                    | 9              | 1.8                   | 1634   | 187187 | 6.8  | Isoform 2 of Protein polybromo-1                                                                                                                                              |
| 4589                     | Q86U86           | 2                    | 9              | 1.8                   | 1689   | 192946 | 6.9  | Protein polybromo-1                                                                                                                                                           |
| 4590                     | Q8NG08           | 2                    | 2              | 2.1                   | 1087   | 123252 | 5.9  | DNA helicase B                                                                                                                                                                |
| 4591                     | C9J840           | 2                    | 2              | 2.5                   | 987    | 113561 | 6.8  | Uncharacterized protein                                                                                                                                                       |
| 4591                     | UPI000198C5A4    | 2                    | 2              | 2.4                   | 1056   | 121375 | 7.8  | UPI000198C5A4 UniRef100 entry                                                                                                                                                 |
| 4591                     | Q5MD60           | 2                    | 2              | 2.4                   | 1042   | 119405 | 6.6  | Mitogen-activated protein kinase kinase kinase 4 isoform                                                                                                                      |
| 4591                     | E7EX83           | 2                    | 2              | 2.4                   | 1038   | 119000 | 6.9  | Uncharacterized protein                                                                                                                                                       |
| 4591                     | E7ENQ1           | 2                    | 2              | 2.2                   | 1154   | 132166 | 7.5  | Uncharacterized protein                                                                                                                                                       |
| 4591                     | UPI000198C5A2    | 2                    | 2              | 2.1                   | 1170   | 134171 | 8    | UPI000198C5A2 UniRef100 entry                                                                                                                                                 |
| 4591                     | UPI000014131B    | 2                    | 2              | 2.1                   | 1166   | 133488 | 7.7  | mitogen-activated protein kinase kinase kinase 4 isoform 1                                                                                                                    |
| 4591                     | UPI000013E7B3    | 2                    | 2              | 2.1                   | 1166   | 133571 | 7.9  | Mitogen-activated protein kinase kinase kinase 4 (EC 2.7.11.1) (MAPK/ERK kinase kinase 4) (MEK kinase kinase 4) (MEKKK 4) (HPK/GCK-like kinase HGK) (Nck-interacting kinase). |
| 4591                     | UPI000003E780    | 2                    | 2              | 2.1                   | 1212   | 138505 | 7.5  | mitogen-activated protein kinase kinase kinase 4 isoform 3                                                                                                                    |
| 4591                     | O95819-4         | 2                    | 2              | 2.1                   | 1165   | 133401 | 7.7  | Isoform 4 of Mitogen-activated protein kinase kinase kinase 4                                                                                                                 |
| 4591                     | O95819-2         | 2                    | 2              | 2.1                   | 1211   | 138417 | 7.5  | Isoform 2 of Mitogen-activated protein kinase kinase kinase 4                                                                                                                 |
| 4591                     | E7ESS2           | 2                    | 2              | 2.1                   | 1187   | 136117 | 7.7  | Uncharacterized protein                                                                                                                                                       |
| 4591                     | B7Z388           | 2                    | 2              | 2                     | 1279   | 145900 | 7.9  | cDNA FLJ56564, highly similar to Mitogen-activated protein kinase kinase kinase 4 (EC 2.7.11.1)                                                                               |
| 4591                     | O95819           | 2                    | 2              | 2                     | 1239   | 142101 | 7.5  | Mitogen-activated protein kinase kinase kinase 4                                                                                                                              |
| 4591                     | E9PH72           | 2                    | 2              | 2                     | 1265   | 145188 | 7.4  | Uncharacterized protein                                                                                                                                                       |
| 4591                     | E7EN19           | 2                    | 2              | 2                     | 1272   | 144917 | 7.5  | Uncharacterized protein                                                                                                                                                       |
| 4591                     | B7Z3V5           | 2                    | 2              | 2                     | 1235   | 141097 | 7.5  | cDNA FLJ60617, highly similar to Mitogen-activated protein kinase kinase kinase 4 (EC 2.7.11.1)                                                                               |
| 4591                     | UPI000014130C    | 2                    | 2              | 1.9                   | 1320   | 151083 | 7.6  | Mitogen-activated protein kinase kinase kinase 4 (EC 2.7.11.1) (MAPK/ERK kinase kinase 4) (MEK kinase kinase 4) (MEKKK 4) (HPK/GCK-like kinase HGK) (Nck-interacting kinase). |
| 4591                     | O95819-3         | 2                    | 2              | 1.9                   | 1319   | 150913 | 7.4  | Isoform 3 of Mitogen-activated protein kinase kinase kinase 4                                                                                                                 |
| 4592                     | Q13017           | 2                    | 2              | 2                     | 1502   | 172459 | 6.6  | Rho GTPase-activating protein 5                                                                                                                                               |
| 4592                     | Q13017-2         | 2                    | 2              | 2                     | 1501   | 172331 | 6.6  | Isoform 2 of Rho GTPase-activating protein 5                                                                                                                                  |
| 4593                     | O75179-5         | 2                    | 7              | 3.1                   | 751    | 77825  | 4.8  | Isoform 5 of Ankyrin repeat domain-containing protein 17                                                                                                                      |
| 4593                     | B5MEE3           | 2                    | 7              | 1.9                   | 1181   | 124716 | 5    | Uncharacterized protein                                                                                                                                                       |
| 4593                     | O75179-3         | 2                    | 7              | 1.9                   | 1187   | 124637 | 4.9  | Isoform 3 of Ankyrin repeat domain-containing protein 17                                                                                                                      |
| 4593                     | C9JRC1           | 2                    | 7              | 1.9                   | 1186   | 124494 | 4.9  | Uncharacterized protein                                                                                                                                                       |
| 4593                     | O75179-4         | 2                    | 7              | 1.1                   | 2010   | 210591 | 6.5  | Isoform 4 of Ankyrin repeat domain-containing protein 17                                                                                                                      |
| 4593                     | E7EWI7           | 2                    | 7              | 1.1                   | 2010   | 210532 | 6.4  | Uncharacterized protein                                                                                                                                                       |
| 4593                     | UPI00002263B1    | 2                    | 7              | 1                     | 2352   | 246748 | 6.7  | ankyrin repeat domain-containing protein 17 isoform b                                                                                                                         |
| 4593                     | O75179-2         | 2                    | 7              | 0.9                   | 2602   | 274185 | 6.5  | Isoform 2 of Ankyrin repeat domain-containing protein 17                                                                                                                      |
| 4593                     | O75179           | 2                    | 7              | 0.9                   | 2603   | 274256 | 6.5  | Ankyrin repeat domain-containing protein 17                                                                                                                                   |



Table S1. Proteins identified in the OVCAR-3 tumor supernatant by two or more unique peptides.

| Protein or Protein Group | Accession Number | Unique Peptide Count | Spectrum Count | Sequence Coverage (%) | Length | MolWt  | pI  | Descriptive Name                                                                                                                |
|--------------------------|------------------|----------------------|----------------|-----------------------|--------|--------|-----|---------------------------------------------------------------------------------------------------------------------------------|
| 4594                     | P42695           | 2                    | 2              | 1.9                   | 1496   | 168890 | 7.5 | Condensin-2 complex subunit D3                                                                                                  |
| 4594                     | UPI000047C8C7    | 2                    | 2              | 1.9                   | 1494   | 168072 | 7.5 | UPI000047C8C7 UniRef100 entry                                                                                                   |
| 4595                     | Q5SRE5-2         | 2                    | 2              | 2                     | 1638   | 182292 | 6.8 | Isoform 2 of Nucleoporin NUP188 log                                                                                             |
| 4595                     | Q5SRE5           | 2                    | 2              | 1.9                   | 1749   | 196041 | 6.7 | Nucleoporin NUP188 log                                                                                                          |
| 4596                     | Q9HCE0           | 2                    | 2              | 1.9                   | 2579   | 292479 | 6.4 | UPF0493 protein KIAA1632                                                                                                        |
| 4597                     | A6QRH2           | 2                    | 2              | 1.8                   | 1266   | 142698 | 6.2 | Plexin B2                                                                                                                       |
| 4597                     | Q15031           | 2                    | 2              | 1.3                   | 1838   | 205126 | 6.2 | Plexin-B2                                                                                                                       |
| 4598                     | Q8N201           | 2                    | 3              | 1.8                   | 2190   | 244295 | 6.1 | Integrator complex subunit 1                                                                                                    |
| 4598                     | A4D212           | 2                    | 3              | 1.7                   | 2394   | 265754 | 6.7 | DKFZP586J0619 protein                                                                                                           |
| 4598                     | UPI0001AE702D    | 2                    | 3              | 1.7                   | 2404   | 266207 | 6.7 | Integrator complex subunit 1 (Int1).                                                                                            |
| 4598                     | A4D213           | 2                    | 3              | 1.7                   | 2408   | 266641 | 6.7 | DKFZP586J0619 protein                                                                                                           |
| 4599                     | Q7RTP6-4         | 2                    | 2              | 1.9                   | 966    | 109075 | 8   | Isoform 4 of Protein MICAL-3                                                                                                    |
| 4599                     | Q7RTP6-2         | 2                    | 2              | 1.9                   | 948    | 106837 | 8.2 | Isoform 2 of Protein MICAL-3                                                                                                    |
| 4599                     | E9PEF0           | 2                    | 2              | 1.9                   | 966    | 109047 | 7.9 | Uncharacterized protein                                                                                                         |
| 4599                     | Q7RTP6-3         | 2                    | 2              | 1.8                   | 976    | 109911 | 8.4 | Isoform 3 of Protein MICAL-3                                                                                                    |
| 4599                     | B2RXJ5           | 2                    | 2              | 1.7                   | 1073   | 121173 | 8.6 | MICAL3 protein                                                                                                                  |
| 4599                     | Q7RTP6           | 2                    | 2              | 0.9                   | 2002   | 224293 | 5.6 | Protein MICAL-3                                                                                                                 |
| 4600                     | UPI0001881A7B    | 2                    | 3              | 1.9                   | 1254   | 134592 | 5.7 | pleckstrin logy domain containing, family G (with RhoGef domain) member 2                                                       |
| 4600                     | Q9H7P9-3         | 2                    | 3              | 1.8                   | 1357   | 144720 | 5.7 | Isoform 3 of Pleckstrin logy domain-containing family G member 2                                                                |
| 4600                     | Q9H7P9           | 2                    | 3              | 1.7                   | 1386   | 147969 | 5.9 | Pleckstrin logy domain-containing family G member 2                                                                             |
| 4601                     | A8MXE8           | 2                    | 2              | 3.4                   | 942    | 101428 | 5.5 | Uncharacterized protein                                                                                                         |
| 4601                     | E7ETW1           | 2                    | 2              | 3.3                   | 966    | 104303 | 5.5 | Uncharacterized protein                                                                                                         |
| 4601                     | Q7Z5J4-3         | 2                    | 2              | 2                     | 1640   | 175342 | 9.1 | Isoform 3 of Retinoic acid-induced protein 1                                                                                    |
| 4601                     | E7EVZ3           | 2                    | 2              | 2                     | 1640   | 175376 | 9.1 | Uncharacterized protein                                                                                                         |
| 4601                     | Q7Z5J4-2         | 2                    | 2              | 1.7                   | 1862   | 198390 | 8.9 | Isoform 2 of Retinoic acid-induced protein 1                                                                                    |
| 4601                     | Q7Z5J4           | 2                    | 2              | 1.7                   | 1906   | 203350 | 8.8 | Retinoic acid-induced protein 1                                                                                                 |
| 4601                     | C9JWB0           | 2                    | 2              | 1.7                   | 1862   | 198465 | 8.9 | Uncharacterized protein                                                                                                         |
| 4601                     | A8MTC3           | 2                    | 2              | 1.6                   | 1993   | 212244 | 8.9 | Uncharacterized protein                                                                                                         |
| 4602                     | UPI0001DD21C3    | 2                    | 6              | 1.6                   | 1661   | 177912 | 6   | absent in melanoma 1-like protein                                                                                               |
| 4603                     | Q8IZH2           | 2                    | 2              | 1.5                   | 1706   | 194106 | 7.2 | 5'-3' exoribonuclease 1                                                                                                         |
| 4603                     | UPI0000480180    | 2                    | 2              | 1.5                   | 1693   | 192713 | 7.3 | 5'''-3''' exoribonuclease 1 isoform b                                                                                           |
| 4603                     | Q8IZH2-2         | 2                    | 2              | 1.5                   | 1694   | 192842 | 7.3 | Isoform 2 of 5'-3' exoribonuclease 1                                                                                            |
| 4604                     | Q9UG01-2         | 2                    | 2              | 1.8                   | 1525   | 172437 | 6.2 | Isoform 2 of Intraflagellar transport protein 172 log                                                                           |
| 4604                     | Q9UG01           | 2                    | 2              | 1.5                   | 1749   | 197575 | 6.1 | Intraflagellar transport protein 172 log                                                                                        |
| 4605                     | Q9Y3S1-3         | 2                    | 2              | 4.1                   | 779    | 84868  | 5.4 | Isoform 3 of Serine/threonine-protein kinase WNK2                                                                               |
| 4605                     | C9JGD6           | 2                    | 2              | 4.1                   | 779    | 84710  | 5.3 | Uncharacterized protein                                                                                                         |
| 4605                     | A6PVV2           | 2                    | 2              | 4.1                   | 790    | 85882  | 5.3 | WNK lysine deficient protein kinase 2 (Fragment)                                                                                |
| 4605                     | A6PVR3           | 2                    | 2              | 1.4                   | 2219   | 234470 | 5.9 | WNK lysine deficient protein kinase 2 (Fragment)                                                                                |
| 4605                     | UPI00001B09BB    | 2                    | 2              | 1.4                   | 2217   | 234378 | 5.8 | serine/threonine-protein kinase WNK2                                                                                            |
| 4605                     | Q9Y3S1-4         | 2                    | 2              | 1.4                   | 2254   | 238276 | 5.9 | Isoform 4 of Serine/threonine-protein kinase WNK2                                                                               |
| 4605                     | Q9Y3S1-2         | 2                    | 2              | 1.4                   | 2224   | 234946 | 5.9 | Isoform 2 of Serine/threonine-protein kinase WNK2                                                                               |
| 4605                     | Q9Y3S1           | 2                    | 2              | 1.4                   | 2297   | 242673 | 6.1 | Serine/threonine-protein kinase WNK2                                                                                            |
| 4606                     | B4DG55           | 2                    | 2              | 1.4                   | 1306   | 148375 | 8.4 | cDNA FLJ53905, highly similar to Phosphatidylinositol-4-phosphate 3-kinase C2domain-containing alpha polypeptide (EC 2.7.1.154) |
| 4606                     | O00443           | 2                    | 2              | 1.1                   | 1686   | 190678 | 8   | Phosphatidylinositol-4-phosphate 3-kinase C2 domain-containing subunit alpha                                                    |
| 4607                     | Q13395           | 2                    | 5              | 1.4                   | 1621   | 181674 | 7.1 | Probable methyltransferase TARBP1                                                                                               |
| 4608                     | Q9BU62           | 2                    | 2              | 9.1                   | 339    | 36378  | 9.7 | BAT2L protein                                                                                                                   |
| 4608                     | Q5JSZ5-5         | 2                    | 2              | 2                     | 1535   | 165526 | 8.8 | Isoform 1 of Protein PRRC2B                                                                                                     |
| 4608                     | Q5JSZ5           | 2                    | 2              | 1.4                   | 2229   | 242964 | 8.3 | Protein PRRC2B                                                                                                                  |
| 4609                     | Q96PE2           | 2                    | 2              | 1.4                   | 2063   | 221671 | 6.3 | Rho guanine nucleotide exchange factor 17                                                                                       |
| 4610                     | Q5DT20           | 2                    | 4              | 1.3                   | 2850   | 282360 | 10  | Hornerin                                                                                                                        |
| 4610                     | Q86YZ3           | 2                    | 4              | 1.3                   | 2850   | 282389 | 10  | Hornerin                                                                                                                        |
| 4611                     | O95425-2         | 2                    | 2              | 1.5                   | 1788   | 200846 | 6.9 | Isoform 2 of Supervillin                                                                                                        |
| 4611                     | O95425           | 2                    | 2              | 1.2                   | 2214   | 247744 | 7   | Supervillin                                                                                                                     |
| 4612                     | B7ZM65           | 2                    | 5              | 1.1                   | 1645   | 178188 | 9   | PHRF1 protein                                                                                                                   |
| 4612                     | Q9P1Y6-3         | 2                    | 5              | 1.1                   | 1648   | 178578 | 8.9 | Isoform 3 of PHD and RING finger domain-containing protein 1                                                                    |
| 4612                     | Q9P1Y6           | 2                    | 5              | 1.1                   | 1649   | 178665 | 8.9 | PHD and RING finger domain-containing protein 1                                                                                 |
| 4612                     | E9PJ24           | 2                    | 5              | 1.1                   | 1645   | 178216 | 9   | Uncharacterized protein                                                                                                         |
| 4612                     | B7ZM66           | 2                    | 5              | 1.1                   | 1647   | 178477 | 9   | PHRF1 protein                                                                                                                   |
| 4613                     | Q59FF5           | 2                    | 2              | 1.3                   | 1409   | 164920 | 9   | Myosin Va variant (Fragment)                                                                                                    |
| 4613                     | A8CDT9           | 2                    | 2              | 1                     | 1828   | 212257 | 8.6 | MYO5A variant protein                                                                                                           |
| 4613                     | UPI000188136E    | 2                    | 2              | 1                     | 1855   | 215389 | 8.5 | myosin-Va isoform 1                                                                                                             |
| 4613                     | Q9Y4I1-3         | 2                    | 2              | 1                     | 1880   | 218606 | 8.5 | Isoform 3 of Myosin-Va                                                                                                          |
| 4613                     | Q9Y4I1-2         | 2                    | 2              | 1                     | 1828   | 212271 | 8.6 | Isoform 2 of Myosin-Va                                                                                                          |
| 4613                     | Q9Y4I1           | 2                    | 2              | 1                     | 1855   | 215403 | 8.5 | Myosin-Va                                                                                                                       |
| 4613                     | E7ERV4           | 2                    | 2              | 1                     | 1852   | 215045 | 8.5 | Uncharacterized protein                                                                                                         |
| 4614                     | P78559           | 2                    | 4              | 0.9                   | 2803   | 305484 | 4.9 | Microtubule-associated protein 1A                                                                                               |
| 4614                     | UPI00015DFCF5    | 2                    | 4              | 0.9                   | 2805   | 305671 | 4.9 | Microtubule-associated protein 1A (MAP 1A) (Proliferation-related protein p80) [Contains: MAP1 light chain LC2].                |
| 4614                     | P78559-2         | 2                    | 4              | 0.9                   | 2805   | 305671 | 4.9 | Isoform 2 of Microtubule-associated protein 1A                                                                                  |
| 4615                     | Q04721           | 2                    | 4              | 0.9                   | 2471   | 265403 | 5.1 | Neurogenic locus notch log protein 2                                                                                            |
| 4616                     | Q461N2           | 2                    | 2              | 1                     | 1995   | 222935 | 7.1 | Ciprofibrate bound protein p240 isoform PRIC320-2                                                                               |
| 4616                     | B7ZML1           | 2                    | 2              | 0.7                   | 2897   | 326006 | 7   | CHD9 protein                                                                                                                    |
| 4616                     | Q3L8U1-3         | 2                    | 2              | 0.7                   | 2882   | 324127 | 6.9 | Isoform 3 of Chromodomain-helicase-DNA-binding protein 9                                                                        |
| 4616                     | Q3L8U1-2         | 2                    | 2              | 0.7                   | 2881   | 324056 | 6.9 | Isoform 2 of Chromodomain-helicase-DNA-binding protein 9                                                                        |
| 4616                     | Q3L8U1           | 2                    | 2              | 0.7                   | 2897   | 326022 | 7   | Chromodomain-helicase-DNA-binding protein 9                                                                                     |
| 4617                     | Q9C0G6           | 2                    | 2              | 0.7                   | 4158   | 475986 | 6   | Dynein heavy chain 6, axonemal                                                                                                  |
| 4618                     | UPI0001AE79C6    | 2                    | 4              | 0.6                   | 5706   | 590788 | 6.7 | Mucin-5B precursor (Mucin-5 subtype B, tracheobronchial) (High molecular weight salivary mucin MG1) (Sublingual gland mucin).   |
| 4618                     | Q9HC84           | 2                    | 4              | 0.6                   | 5762   | 596344 | 6.6 | Mucin-5B                                                                                                                        |
| 4618                     | E9PBJ0           | 2                    | 4              | 0.6                   | 5765   | 596691 | 6.7 | Uncharacterized protein                                                                                                         |
| 4618                     | A7Y9J9           | 2                    | 4              | 0.5                   | 6207   | 648809 | 6.8 | Mucin 5AC, oligomeric mucus/gel-forming                                                                                         |
| 4618                     | E7EVQ7           | 2                    | 4              | 0.5                   | 6205   | 648695 | 6.8 | Uncharacterized protein                                                                                                         |
| 4619                     | E9PFR5           | 2                    | 2              | 0.4                   | 4588   | 506278 | 5   | Uncharacterized protein                                                                                                         |
| 4619                     | UPI0000418CED    | 2                    | 2              | 0.4                   | 4591   | 506583 | 5   | Cadherin-related tumor suppressor log precursor (Protein fat log).                                                              |
| 4619                     | Q14517           | 2                    | 2              | 0.4                   | 4590   | 506283 | 5   | Protocadherin Fat 1                                                                                                             |
