# Supplementary material for: Identification of Multiple Novel Protein Biomarkers Shed by Human Serous Ovarian Tumors into the Blood of Immunocompromised Mice and Verified in Patient Sera
Source: PubMed Central journal article supplement (PMC3609810; doi:10.1371/journal.pone.0060129), 2013-03-27
Supplement: pone.0060129.s003.pdf [file pone.0060129.s003.pdf]

**Table S2.** Sample classification for ovarian cancer patient sera.

| Sample Code | Age | Sample Classification | Grade | Histotype <sup>1</sup> | 4h LC-MS/MS |           |
|-------------|-----|-----------------------|-------|------------------------|-------------|-----------|
|             |     |                       |       |                        | Pools       | MRM Pools |
| WCS-02      | 56  | Normal                |       |                        |             | Pool N    |
| WCS-04      | 50  | Normal                |       |                        |             | Pool N    |
| WCS-12      | 57  | Normal                |       |                        |             | Pool N    |
| WCS-13      | 73  | Normal                |       |                        |             | Pool N    |
| WCS-14      | 55  | Normal                |       |                        |             | Pool N    |
| WCS-15      | 54  | Normal                |       |                        |             | Pool N    |
| WCS-16      | 60  | Normal                |       |                        |             | Pool N    |
| WCS-18      | 53  | Normal                |       |                        |             | Pool N    |
| WCS-20      | 68  | Normal                |       |                        |             | Pool N    |
| B23-01      |     | Benign                |       |                        | Pool B      | Pool B    |
| B25-01      |     | Benign                |       |                        | Pool B      | Pool B    |
| B70-01      |     | Benign                |       |                        | Pool B      | Pool B    |
| B77-01      |     | Benign                |       |                        | Pool B      | Pool B    |
| B79-01      |     | Benign                |       |                        | Pool B      | Pool B    |
| B80-01      |     | Benign                |       |                        | Pool B      | Pool B    |
| B81-01      |     | Benign                |       |                        | Pool B      | Pool B    |
| B82-01      |     | Benign                |       |                        | Pool B      | Pool B    |
| B83-01      |     | Benign                |       |                        | Pool B      | Pool B    |
| B78-01      |     | Benign                |       |                        |             | Pool B    |
| 471         | 58  | Stage 1               | 3     | UN                     |             | Pool E    |
| 484         | 72  | Stage 1               |       | OT                     |             | Pool E    |
| 522         | 46  | Stage 1               | 3     | SP                     |             | Pool E    |
| 537         | 66  | Stage 1               | 1     | EN                     |             | Pool E    |
| 542         | 60  | Stage 1               | 2     | MC                     |             | Pool E    |
| 545         | 55  | Stage 1               | 3     | SP                     |             | Pool E    |
| 546         | 37  | Stage 1               | 1     | UN                     |             | Pool E    |
| 547         | 50  | Stage 1               | 1     | SP                     |             | Pool E    |
| 550         | 27  | Stage 1               | 0     | EN                     |             | Pool E    |
| 554         |     | Stage 1               |       |                        |             | Pool E    |
| 608         | 69  | Stage 1               | 2     | EN                     |             | Pool E    |
| 624         | 54  | Stage 1               | 1     | MC                     |             | Pool E    |
| 626         | 55  | Stage 1               | 3     | SP                     |             | Pool E    |
| 454         | 61  | Stage 2               | 1     | SA                     |             | Pool E    |
| 504         | 54  | Stage 2               | 3     | SP                     |             | Pool E    |
| 555         | 59  | Stage 2               | 3     | SP                     |             | Pool E    |
| 580         | 64  | Stage 2               | 2     | UN                     |             | Pool E    |
| 627         | 81  | Stage 2               | 3     | SP                     |             | Pool E    |
| 475         | 50  | Stage 3               | 3     | EN                     | Pool C1     | Pool L    |
| 476         | 28  | Stage 3               | 1     | MU                     | Pool C1     | Pool L    |
| 478         | 80  | Stage 3               | 3     | SP                     | Pool C1     | Pool L    |
| 536         | 28  | Stage 3               | 0     | SP                     | Pool C1     | Pool L    |
| 539         | 60  | Stage 3               | 3     | SP                     | Pool C1     | Pool L    |
| 541         | 69  | Stage 3               |       | SP                     | Pool C1     | Pool L    |
| 543         | 51  | Stage 3               | 2     | SP                     | Pool C1     | Pool L    |
| 553         | 54  | Stage 3               | 3     | SP                     | Pool C1     | Pool L    |
| 577         | 41  | Stage 3               | 3     | UN                     | Pool C1     | Pool L    |
| 487         | 62  | Stage 3               | 3     | UN                     | Pool C2     | Pool L    |
| 497         | 66  | Stage 3               | 3     | SP                     | Pool C2     | Pool L    |
| 500         | 49  | Stage 3               | 3     | SP                     | Pool C2     | Pool L    |
| 502         | 64  | Stage 3               | 3     | SP                     | Pool C2     | Pool L    |
| 503         | 63  | Stage 3               | 3     | SP                     | Pool C2     | Pool L    |
| 505         | 67  | Stage 3               | 3     | UN                     | Pool C2     | Pool L    |
| 508         | 68  | Stage 3               | 3     | SP                     | Pool C2     | Pool L    |
| 511         | 70  | Stage 3               | 3     | SP                     | Pool C2     | Pool L    |
| 514         | 53  | Stage 3               | 3     | SP                     | Pool C2     | Pool L    |
| 509         |     | Stage 3               |       |                        |             | Pool L    |
| 521         | 54  | Stage 3               | 3     | EN                     |             | Pool L    |
| 551         |     | Stage 3               | 3     |                        |             | Pool L    |
| 558         | 61  | Stage 3               | 3     | SP                     |             | Pool L    |
| 579         | 74  | Stage 3               | 3     | SP                     |             | Pool L    |
| 599         | 73  | Stage 3               | 3     | SP                     |             | Pool L    |
| 600         | 46  | Stage 3               | 3     | AD                     |             | Pool L    |
| 602         | 56  | Stage 3               | 3     | UN                     |             | Pool L    |
| 604         | 38  | Stage 3               | 0     | SP                     |             | Pool L    |
| 605         | 52  | Stage 3               | 3     | CC                     |             | Pool L    |
| 607         | 57  | Stage 3               | 3     | SP                     |             | Pool L    |
| 474         | 66  | Stage 4               | 3     | SP                     | Pool C3     |           |
| 482         | 68  | Stage 4               | 2     | SP                     | Pool C3     |           |
| 510         | 70  | Stage 4               | 3     | SP                     | Pool C3     |           |
| 517         | 57  | Stage 4               | 3     | SP                     | Pool C3     |           |
| 557         | 67  | Stage 4               | 3     | UN                     | Pool C3     |           |

<sup>1</sup>AD: Serous papillary adenocarcinoma; CC: Clear cell; EN: Endometrioid; MC: Mucinous; MU: Mullerian; OT: Other non-epithelial; UN: Undifferentiated; SA: Sarcoma; SP: Serous papillary
