# Supplementary material for: Identification of Multiple Novel Protein Biomarkers Shed by Human Serous Ovarian Tumors into the Blood of Immunocompromised Mice and Verified in Patient Sera
Source: PubMed Central journal article supplement (PMC3609810; doi:10.1371/journal.pone.0060129), 2013-03-27
Supplement: pone.0060129.s004.pdf [file pone.0060129.s004.pdf]

Table S3. Peptide transitions monitored by MRM.

| Accession                 | Gene Name   | Protein Description                                 | Peptide Sequence    | Precursor Charge | Transition |         |      |           | Area      |           |           |            | Normalized Amount |           |          |  |
|---------------------------|-------------|-----------------------------------------------------|---------------------|------------------|------------|---------|------|-----------|-----------|-----------|-----------|------------|-------------------|-----------|----------|--|
|                           |             |                                                     |                     |                  | Q1         | Q3      | CE   | Normal    | Benign    | Early     | Late      | Normal (N) | Benign (B)        | Early (E) | Late (L) |  |
| P18065                    | IGFBP2      | Insulin-like growth factor-binding protein 2        | MPCAEELVR           | 2                | 496.24     | 587.35  | 32.7 | 1066368   | 1592517   | 1984164   | 4200943   | 0.48       | 0.72              | 0.90      | 1.90     |  |
| P18065                    | IGFBP2      | Insulin-like growth factor-binding protein 2        | MPCAEELVR           | 2                | 488.24     | 587.35  | 32.4 | 207894    | 297010    | 392773    | 1308117   | 0.38       | 0.54              | 0.71      | 2.37     |  |
| P18065                    | IGFBP2      | Insulin-like growth factor-binding protein 2        | LEGACGVYTPR         | 2                | 676.32     | 692.37  | 35.2 | 1127067   | 1593738   | 2020452   | 4359782   | 0.50       | 0.70              | 0.89      | 1.92     |  |
| P18065                    | IGFBP2      | Insulin-like growth factor-binding protein 2        | TPCQQELDQVLER       | 3                | 539.26     | 644.37  | 26.9 | 696899    | 832768    | 984816    | 1888070   | 0.63       | 0.76              | 0.89      | 1.72     |  |
| P18065                    | IGFBP2      | Insulin-like growth factor-binding protein 2        | HGLYNLK             | 2                | 422.74     | 585.28  | 24.1 | 411038    | 625671    | 757242    | 1624984   | 0.48       | 0.73              | 0.89      | 1.90     |  |
| Normalized Protein Amount |             |                                                     |                     |                  |            |         |      |           |           |           |           |            |                   |           |          |  |
| Q14508                    | WFDC2 (HE4) | WAP four-disulfide core domain protein 2            | EGSCPQVNIINFPQLGLCR | 3                | 697.00     | 843.45  | 29.5 | 0         | 0         | 0         | 133199    | 0.00       | 0.00              | 0.00      | 4.00     |  |
| Q14508                    | WFDC2 (HE4) | WAP four-disulfide core domain protein 2            | DQCQVDSQCQPGQMK     | 2                | 848.84     | 576.28  | 39.4 | 0         | 0         | 0         | 31256     | 0.00       | 0.00              | 0.00      | 4.00     |  |
| Q14508                    | WFDC2 (HE4) | WAP four-disulfide core domain protein 2            | VSCVTPNF            | 2                | 462.22     | 547.25  | 19.5 | 5555      | 0         | 46985     | 215360    | 0.08       | 0.00              | 0.70      | 3.22     |  |
| Normalized Protein Amount |             |                                                     |                     |                  |            |         |      |           |           |           |           |            |                   |           |          |  |
| P02750                    | LRG1        | Leucine-rich alpha-2-glycoprotein                   | ENQLEVLVSWLHGLK     | 3                | 632.01     | 640.87  | 32   | 27779779  | 23079851  | 35225497  | 49782419  | 0.82       | 0.68              | 1.04      | 1.47     |  |
| P02750                    | LRG1        | Leucine-rich alpha-2-glycoprotein                   | ALGHLDLSGNR         | 2                | 576.81     | 661.33  | 29.6 | 64419206  | 50012202  | 80760604  | 109000000 | 0.85       | 0.66              | 1.06      | 1.43     |  |
| P02750                    | LRG1        | Leucine-rich alpha-2-glycoprotein                   | ALGHLDLSGNR         | 3                | 384.88     | 484.75  | 18.5 | 161000000 | 142000000 | 206000000 | 236000000 | 0.86       | 0.76              | 1.11      | 1.27     |  |
| P02750                    | LRG1        | Leucine-rich alpha-2-glycoprotein                   | DLLLPPDLR           | 2                | 590.34     | 725.39  | 24.1 | 268000000 | 213000000 | 300000000 | 400000000 | 0.91       | 0.72              | 1.02      | 1.35     |  |
| P02750                    | LRG1        | Leucine-rich alpha-2-glycoprotein                   | VAAGAFQGLR          | 2                | 495.28     | 620.35  | 20.7 | 69795002  | 50142589  | 76442196  | 111000000 | 0.91       | 0.65              | 0.99      | 1.44     |  |
| Normalized Protein Amount |             |                                                     |                     |                  |            |         |      |           |           |           |           |            |                   |           |          |  |
| O00468                    | AGRN        | Agrin                                               | SAGDVTDLAFDGR       | 2                | 662.31     | 678.36  | 34.7 | 21240     | 20463     | 23125     | 57167     | 0.70       | 0.67              | 0.76      | 1.87     |  |
| O00468                    | AGRN        | Agrin                                               | ALQSNHFELSLR        | 3                | 472.25     | 615.81  | 19.3 | 81869     | 60144     | 76506     | 116087    | 0.98       | 0.72              | 0.91      | 1.39     |  |
| O00468                    | AGRN        | Agrin                                               | AYGTGFVGLR          | 2                | 600.80     | 604.32  | 30.5 | 37500     | 22925     | 56351     | 83947     | 0.75       | 0.46              | 1.12      | 1.67     |  |
| Normalized Protein Amount |             |                                                     |                     |                  |            |         |      |           |           |           |           |            |                   |           |          |  |
| Q9UL46                    | PSME2       | Proteasome activator complex subunit 2              | QNLFQEAEEFLYR       | 2                | 843.91     | 927.46  | 39.2 | 25152     | 123990    | 58615     | 122028    | 0.31       | 1.50              | 0.71      | 1.48     |  |
| Q9UL46                    | PSME2       | Proteasome activator complex subunit 2              | QNLFQEAEEFLYR       | 3                | 562.94     | 598.33  | 22.2 | 70762     | 461121    | 196726    | 408713    | 0.25       | 1.62              | 0.69      | 1.44     |  |
| Q9UL46                    | PSME2       | Proteasome activator complex subunit 2              | CGFLPQNEK           | 2                | 511.24     | 544.27  | 27.3 | 200948    | 1403150   | 544058    | 800572    | 0.27       | 1.90              | 0.74      | 1.09     |  |
| Q9UL46                    | PSME2       | Proteasome activator complex subunit 2              | VEAFQTISK           | 2                | 562.30     | 895.49  | 27.1 | 14019     | 76818     | 46152     | 60069     | 0.28       | 1.56              | 0.94      | 1.22     |  |
| Q9UL46                    | PSME2       | Proteasome activator complex subunit 2              | DEAAYGELR           | 2                | 512.24     | 637.33  | 25.3 | 130474    | 893079    | 331613    | 681241    | 0.26       | 1.75              | 0.65      | 1.34     |  |
| Q9UL46                    | PSME2       | Proteasome activator complex subunit 2              | AFYAELYHIISNLEK     | 3                | 633.33     | 840.44  | 26   | 181002    | 987970    | 403268    | 1169079   | 0.26       | 1.44              | 0.59      | 1.71     |  |
| Normalized Protein Amount |             |                                                     |                     |                  |            |         |      |           |           |           |           |            |                   |           |          |  |
| P60174                    | TP11        | Triosephosphate isomerase                           | HVFGESDELIGQK       | 2                | 729.86     | 1222.60 | 35.1 | 16610     | 300536    | 150648    | 110683    | 0.11       | 2.08              | 1.04      | 0.77     |  |
| P60174                    | TP11        | Triosephosphate isomerase                           | HVFGESDELIGQK       | 3                | 486.91     | 558.36  | 20.1 | 357306    | 4395308   | 2130746   | 1155653   | 0.18       | 2.19              | 1.06      | 0.58     |  |
| P60174                    | TP11        | Triosephosphate isomerase                           | VVFEQTK             | 2                | 425.74     | 652.33  | 22.2 | 1344835   | 13244452  | 6559759   | 8390093   | 0.18       | 1.79              | 0.89      | 1.14     |  |
| P60174                    | TP11        | Triosephosphate isomerase                           | VVLAYEPVWAIGTK      | 2                | 801.95     | 928.53  | 37.7 | 444647    | 3170742   | 2063707   | 3075644   | 0.20       | 1.45              | 0.94      | 1.41     |  |
| P60174                    | TP11        | Triosephosphate isomerase                           | SNVSDAVAQSTR        | 2                | 617.80     | 661.36  | 29.1 | 228593    | 2044587   | 1042127   | 1371255   | 0.20       | 1.75              | 0.89      | 1.17     |  |
| Normalized Protein Amount |             |                                                     |                     |                  |            |         |      |           |           |           |           |            |                   |           |          |  |
| O95865                    | DDAH2       | N(G),N(G)-dimethylarginine dimethylaminohydrolase 2 | GAEIVADTFR          | 2                | 539.78     | 609.30  | 22.3 | 96778     | 277216    | 316482    | 320085    | 0.38       | 1.10              | 1.25      | 1.27     |  |
| O95865                    | DDAH2       | N(G),N(G)-dimethylarginine dimethylaminohydrolase 2 | TVVAGSSDAAQK        | 2                | 567.29     | 763.36  | 25.3 | 17841     | 54920     | 62043     | 65848     | 0.36       | 1.09              | 1.24      | 1.31     |  |
| O95865                    | DDAH2       | N(G),N(G)-dimethylarginine dimethylaminohydrolase 2 | LSDVTLVPVSCSELEK    | 3                | 592.64     | 629.35  | 23.8 | 8959      | 31544     | 43731     | 40851     | 0.29       | 1.01              | 1.40      | 1.31     |  |
| Normalized Protein Amount |             |                                                     |                     |                  |            |         |      |           |           |           |           |            |                   |           |          |  |
| P17900                    | GM2A        | Ganglioside GM2 activator                           | EVAGLWIK            | 2                | 458.27     | 616.38  | 21.4 | 181886    | 103882    | 140836    | 282443    | 1.03       | 0.59              | 0.79      | 1.59     |  |
| P17900                    | GM2A        | Ganglioside GM2 activator                           | TYGLPCHCPFK         | 3                | 460.55     | 558.26  | 16.6 | 1225603   | 594958    | 1463196   | 1802724   | 0.96       | 0.47              | 1.15      | 1.42     |  |
| P17900                    | GM2A        | Ganglioside GM2 activator                           | IESVLSSSGK          | 2                | 503.77     | 764.41  | 23   | 1288466   | 466123    | 1077162   | 1377983   | 1.22       | 0.44              | 1.02      | 1.31     |  |
| Normalized Protein Amount |             |                                                     |                     |                  |            |         |      |           |           |           |           |            |                   |           |          |  |
| P31946                    | YWHAB       | 14-3-3 protein beta/alpha                           | AVTEQGHELSNEER      | 3                | 533.59     | 714.82  | 43.7 | 703517    | 5297758   | 2833637   | 3450420   | 0.23       | 1.72              | 0.92      | 1.12     |  |
| P31946                    | YWHAB       | 14-3-3 protein beta/alpha                           | VISSIEQK            | 2                | 452.26     | 691.36  | 19.1 | 2834603   | 18189412  | 9621293   | 14512282  | 0.25       | 1.61              | 0.85      | 1.29     |  |
| P31946                    | YWHAB       | 14-3-3 protein beta/alpha                           | YLSEVASGDNK         | 2                | 591.79     | 690.34  | 30.2 | 60829     | 517712    | 276247    | 395114    | 0.19       | 1.66              | 0.88      | 1.26     |  |
| Normalized Protein Amount |             |                                                     |                     |                  |            |         |      |           |           |           |           |            |                   |           |          |  |
| Normalized Protein Amount |             |                                                     |                     |                  |            |         |      |           |           |           |           |            |                   |           |          |  |

Table S3. Peptide transitions monitored by MRM.

| Accession                 | Gene Name | Protein Description             | Peptide Sequence     | Precursor Charge | Transition |         |      | Area    |         |         |          | Normalized Amount |          |           |          |
|---------------------------|-----------|---------------------------------|----------------------|------------------|------------|---------|------|---------|---------|---------|----------|-------------------|----------|-----------|----------|
|                           |           |                                 |                      |                  | Q1         | Q3      | CE   | Normal  | Benign  | Early   | Late     | Normal (N)        | Benign B | Early (E) | Late (L) |
| Q04917                    | YWHAH     | 14-3-3 protein eta              | AVTELNEPLSNEDR       | 2                | 793.89     | 830.40  | 39.4 | 135890  | 774538  | 580709  | 918029   | 0.23              | 1.29     | 0.96      | 1.52     |
| Q04917                    | YWHAH     | 14-3-3 protein eta              | ELETVCNDVLSLLDK      | 2                | 874.44     | 1176.59 | 38.3 | 33971   | 109047  | 86337   | 169145   | 0.34              | 1.09     | 0.87      | 1.70     |
| Q04917                    | YWHAH     | 14-3-3 protein eta              | NCNDFQYESK           | 2                | 652.76     | 654.31  | 32.4 | 12340   | 28287   | 29926   | 39502    | 0.45              | 1.03     | 1.09      | 1.44     |
| Q04917                    | YWHAH     | 14-3-3 protein eta              | YLAEVASGEK           | 2                | 533.77     | 790.39  | 24.1 | 142278  | 1008920 | 792586  | 1246138  | 0.18              | 1.27     | 0.99      | 1.56     |
| Q04917                    | YWHAH     | 14-3-3 protein eta              | NSVVEASEAAYK         | 2                | 634.31     | 668.33  | 29.7 | 9050    | 40021   | 34819   | 46843    | 0.28              | 1.22     | 1.07      | 1.43     |
| Normalized Protein Amount |           |                                 |                      |                  |            |         |      |         |         |         | 0.29     | 1.18              | 1.00     | 1.53      |          |
| P25786                    | PSMA1     | Proteasome subunit alpha type-1 | NQYDNDVTWSPQGR       | 3                | 593.61     | 730.36  | 23.9 | 56917   | 238183  | 226500  | 319455   | 0.27              | 1.13     | 1.08      | 1.52     |
| P25786                    | PSMA1     | Proteasome subunit alpha type-1 | IHQIEYAMEAVK         | 3                | 483.25     | 593.30  | 21.9 | 73522   | 192050  | 129185  | 228584   | 0.47              | 1.23     | 0.83      | 1.47     |
| P25786                    | PSMA1     | Proteasome subunit alpha type-1 | IHQIEYAMEAVK         | 3                | 477.91     | 577.30  | 19.6 | 0       | 28381   | 46105   | 30402    | 0.00              | 1.08     | 1.76      | 1.16     |
| P25786                    | PSMA1     | Proteasome subunit alpha type-1 | FVFDRLPVSRR          | 3                | 444.92     | 543.81  | 19.8 | 3544765 | 8988152 | 6862773 | 11598107 | 0.46              | 1.16     | 0.89      | 1.50     |
| P25786                    | PSMA1     | Proteasome subunit alpha type-1 | ETLPAEQDLTK          | 2                | 673.35     | 501.76  | 31.1 | 1208544 | 2950503 | 2238974 | 4122633  | 0.46              | 1.12     | 0.85      | 1.57     |
| Normalized Protein Amount |           |                                 |                      |                  |            |         |      |         |         |         | 0.40     | 1.16              | 0.94     | 1.50      |          |
| P20618                    | PSMB1     | Proteasome subunit beta type-1  | LSEGFSIHTR           | 3                | 382.87     | 517.26  | 16.4 | 83046   | 59162   | 76524   | 151111   | 0.90              | 0.64     | 0.83      | 1.63     |
| P20618                    | PSMB1     | Proteasome subunit beta type-1  | GAVYSFDPVGSYQR       | 2                | 773.37     | 806.42  | 42.7 | 285951  | 630046  | 617877  | 1477014  | 0.38              | 0.84     | 0.82      | 1.96     |
| P20618                    | PSMB1     | Proteasome subunit beta type-1  | DVFISAAER            | 2                | 504.26     | 533.27  | 25   | 461828  | 1733014 | 2394713 | 4394982  | 0.21              | 0.77     | 1.07      | 1.96     |
| P20618                    | PSMB1     | Proteasome subunit beta type-1  | DVYTGDLR             | 2                | 505.25     | 531.29  | 27   | 524283  | 512736  | 767559  | 1634706  | 0.61              | 0.60     | 0.89      | 1.90     |
| Normalized Protein Amount |           |                                 |                      |                  |            |         |      |         |         |         | 0.52     | 0.71              | 0.90     | 1.86      |          |
| P49721                    | PSMB2     | Proteasome subunit beta type-2  | VAASNIVQMK           | 2                | 538.79     | 835.43  | 26.3 | 65829   | 47288   | 121125  | 213424   | 0.59              | 0.42     | 1.08      | 1.91     |
| P49721                    | PSMB2     | Proteasome subunit beta type-2  | VAASNIVQMK           | 2                | 530.79     | 890.48  | 22   | 6634    | 12324   | 6732    | 10879    | 0.73              | 1.35     | 0.74      | 1.19     |
| P49721                    | PSMB2     | Proteasome subunit beta type-2  | YYTPTISR             | 2                | 500.76     | 573.34  | 22.9 | 858517  | 797441  | 1375063 | 2646199  | 0.60              | 0.56     | 0.97      | 1.86     |
| P49721                    | PSMB2     | Proteasome subunit beta type-2  | FILNLPTFSVR          | 2                | 653.88     | 706.39  | 28.4 | 823794  | 2317631 | 1345557 | 2866281  | 0.45              | 1.26     | 0.73      | 1.56     |
| Normalized Protein Amount |           |                                 |                      |                  |            |         |      |         |         |         | 0.55     | 0.77              | 0.92     | 1.76      |          |
| P28070                    | PSMB4     | Proteasome subunit beta type-4  | FEQGVVIAADMLGSYGSLAR | 3                | 671.68     | 810.41  | 45.1 | 0       | 0       | 15487   | 39081    | 0.00              | 0.00     | 1.14      | 2.86     |
| P28070                    | PSMB4     | Proteasome subunit beta type-4  | AIHSWLTR             | 3                | 328.52     | 400.21  | 15.5 | 0       | 120293  | 224303  | 464891   | 0.00              | 0.59     | 1.11      | 2.30     |
| P28070                    | PSMB4     | Proteasome subunit beta type-4  | QPVLSQTEAR           | 2                | 564.80     | 691.34  | 29.2 | 498522  | 540332  | 804003  | 1602987  | 0.58              | 0.63     | 0.93      | 1.86     |
| P28070                    | PSMB4     | Proteasome subunit beta type-4  | FQIATVTEK            | 2                | 518.79     | 648.36  | 23.5 | 122040  | 372343  | 841132  | 1705739  | 0.16              | 0.49     | 1.11      | 2.24     |
| Normalized Protein Amount |           |                                 |                      |                  |            |         |      |         |         |         | 0.18     | 0.43              | 1.07     | 2.32      |          |
